# Supplementary material for: Transcriptomic Analysis of MDBK Cells Infected with Cytopathic and Non-Cytopathic Strains of Bovine Viral Diarrhea Virus (BVDV)
Source: Viruses. 2022 Jun 11;14(6):1276. doi: 10.3390/v14061276 (PMC9228727; doi:10.3390/v14061276)
Supplement: Supplementary file 1 [file viruses-14-01276-s001.zip]

Archive with 14 entries (14 files):
- Figure S1_PCA - cp strain.pdf
- Table S10_KEGG pathway enrichment result of the DEGs 24h p.i. with cp strain.xlsx
- Table S11_KEGG pathway enrichment result of the DEGs 72h p.i. with cp strain.xlsx
- Table S12_KEGG pathway enrichment result of the DEGs 24h p.i. with ncp strains.xlsx
- Table S13_KEGG pathway enrichment result of the DEGs 72h p.i. with ncp strains.xlsx
- Table S1_Differentially expressed entities between infection with subtype 1f and 1b.xlsx
- Table S2_Differentially expressed entities 24h p.i. with cp.xlsx
- Table S3_Differentially expressed entities 72h p.i. with cp.xlsx
- Table S4_Differentially expressed entities 24h p.i. with ncp.xlsx
- Table S5_Differentially expressed entities 72h p.i. with ncp.xlsx
- Table S6_GO enrichment results of the DEGs 24h p.i. with cp strain.xlsx
- Table S7_GO enrichment results of the DEGs 72h p.i. with cp strain.xlsx
- Table S8_GO enrichment results of the DEGs 24h p.i. with ncp strains.xlsx
- Table S9_GO enrichment results of the DEGs 72h p.i. with ncp strains.xlsx
