# Supplementary material for: Transcriptomic Analysis of MDBK Cells Infected with Cytopathic and Non-Cytopathic Strains of Bovine Viral Diarrhea Virus (BVDV)
Source: Viruses. 2022 Jun 11;14(6):1276. doi: 10.3390/v14061276 (PMC9228727; doi:10.3390/v14061276)
Supplement: Supplementary file 1 [file viruses-14-01276-s001.zip › Table S1_Differentially expressed entities between infection with subtype 1f and 1b.xlsx]

## Sheet: Arkusz1
Gene_ID	p (Corr) ( [1b] vs [1f] )	p ( [1b] vs [1f] )	Regulation	FC (abs)	FC	Log FC	GeneSymbol	Description	Sequence
A_73_P079836	0.0415601	5.62966e-06	down	2.70441	-2.70441	-1.43531		Rep: WD40 repeat-containing protein - Dictyostelium discoideum (Slime mold), partial (7%) [TC420204]	TCCAGTGAATCAGGGAAGGAGAAAGTGGTTACTAGCCAGGCTTACTACTAGCATAAGTCT
A_73_P032096,A_73_111060|281733	0.0468252	8.90822e-06	down	1.61536	-1.61536	-0.69186	CXADR	Bos taurus coxsackie virus and adenovirus receptor (CXADR), mRNA [NM_174298]	GTAGAGTATTTTGCAGTTGCCAAGTAAATGCTGGCCCTGCGCTTTAGGTGATATTTTCCT///GTCACCCATGCTGTCCTCTGGAAATATGAACATCCGTACATTTTGCTACCAGCCTCAAAA
A_73_P037291|518635	0.0226405	8.61444e-07	down	3.50019	-3.50019	-1.80743	MFSD11	Bos taurus major facilitator superfamily domain containing 11 (MFSD11), mRNA [NM_001075777]	GAAGAGAAAAGCCTCATTGGACTTTCTGGCATTTTCATCGGCATTGGAGAAATTTTAGGT
A_73_P086946	0.0415601	3.65596e-06	down	2.04621	-2.04621	-1.03295		solute carrier family 44 member 1 [Source:HGNC Symbol;Acc:HGNC:18798] [ENSBTAT00000009435]	CCAGGCAGAGAATTTTATATGGATAAAGTACTGATGGAGTTTGTGGAAAACAGTAGGAAA
