# Supplementary material for: Transcriptomic Analysis of MDBK Cells Infected with Cytopathic and Non-Cytopathic Strains of Bovine Viral Diarrhea Virus (BVDV)
Source: Viruses. 2022 Jun 11;14(6):1276. doi: 10.3390/v14061276 (PMC9228727; doi:10.3390/v14061276)
Supplement: Supplementary file 1 [file viruses-14-01276-s001.zip › Table S2_Differentially expressed entities 24h p.i. with cp.xlsx]

## Sheet: Arkusz1
Gene_ID	p (Corr) ( [1] )	p ( [1] )	Regulation	FC (abs)	FC	Log FC	GeneSymbol	Description	Sequence
A_73_P042021|281212	0.000573456	5.20153e-06	up	147.527	147.527	7.20484	GRO1	Bos taurus chemokine (C-X-C motif) ligand 1 (melanoma growth stimulating activity, alpha) (GRO1), mRNA [NM_175700]	GTTCAAGCAAACAGATAGGTCACGATCACTGTTAATGTAGGGAATGTATGTATACATTTA
A_73_P107676,A_73_118449,A_73_P108356|280828	0.000899887	3.93504e-05	up	79.1612	79.1612	6.30672	CXCL8	Bos taurus C-X-C motif chemokine ligand 8 (CXCL8), mRNA [NM_173925]	TGTTAAGCTTACCAATGGAAACGAGGTCTGCTTAAACCCCAAGGAAAAGTGGGTGCAGAA///TCTTGCCCTTATTATGCAATGATGTGTTGTATCATGTGAATCTTGAGACTGTCTTTCCTA///AATCCTGCTTTTTTGTTTTCGGTTTTTGTATATCTTGCAACCCTCGCCTGCTGGCCAGGA
A_73_118029	0.00136334	0.000101809	up	65.7764	65.7764	6.0395			GTGTTGCATTGCATTTATTTCAGTTGTATTTATGTACATGTATACCTGTCATGCTTCTGG
A_73_107923,A_73_P074896,A_73_P101196,A_73_P110776|281309	0.00130468	9.24537e-05	up	44.9907	44.9907	5.49155	MMP3	Bos taurus matrix metallopeptidase 3 (stromelysin 1, progelatinase) (MMP3), mRNA [NM_001206637]	ACAAAGGATTTACCCAGAGATGCTGTTGATTCTGCCATTGAAAAAGCTCTGACAGTCTGG///GACCCAAATGCAAAGAAAGTGACACATGTGTTGAAGAGTAACAGCTGGTTGAATTGTTAG///TTTTGGCGGAAATCTTTCAGGACATTCGAACCTGAATTTCATTTGATCTCTTTCATTCTG///GTGGAAGATTTTCCAGGGGTTGAATCAGAGGTGGATGCTGTTTTTGAAGAATTTGGGTTC
A_73_P033386,A_73_104667|539571	0.000655957	1.34648e-05	up	34.9064	34.9064	5.12542	ESM1	Bos taurus endothelial cell specific molecule 1 (ESM1), mRNA [NM_001098101]	GTTGTGAATGTGTGTGTGAGGCTCTTTTAATGTAAGCTGAATAAGCTGTTTGGATTTCTT///TATAGTATATGGACATATGATTTTTGGAGACCAAGTGTGATTTAGGGTGGGTCCACAAAA
A_73_111876	0.000609441	7.15434e-06	up	33.985	33.985	5.08683		PREDICTED: Bos taurus follistatin (FST), transcript variant X1, mRNA [XM_005221516]	TTAAAGGCTAGTCTGCTGTACCTTTTCAACTAGTTCTTTTCACCCAATGTGTCATGAAAA
A_73_103483	0.00449683	0.000837308	up	29.1292	29.1292	4.8644		Rep: SNAP25 homologous protein SNAP33 - Arabidopsis thaliana (Mouse-ear cress), partial (5%) [TC409969]	TCTTCACTGTAACCCTTTCTCATCCCACATCAAAAGTTACCACAGAAGGTTTCCTTTGTA
A_73_106541|327681	0.000691745	1.70447e-05	up	23.6868	23.6868	4.56601	FST	Bos taurus follistatin (FST), mRNA [NM_175801]	TGAAGACCAGGACTACAGCTTTCCTATATCTTCCATTCTAGAGTGGTAAACCCTCCACCA
A_73_108688|613667	0.000530718	3.87886e-06	up	22.2561	22.2561	4.47613	CXCL3	Bos taurus chemokine (C-X-C motif) ligand 3 (CXCL3), mRNA [NM_001046513]	ATGTCTTGCTTGTAAGGCATAATGCCTTGTTTAATGTTTACTATGTGGTGTTTCTCTTTG
A_73_101022|281096	0.00243105	0.000310311	up	20.0725	20.0725	4.32715	CSF3	Bos taurus colony stimulating factor 3 (CSF3), mRNA [NM_174028]	TCTGGGGTCCCACAAATTTGCTGGGGAAACTTCGTCAAGACTTTTTTCAAGCACATTTTG
A_73_P291891,A_73_P064036|281376	0.00634669	0.00140884	up	19.048	19.048	4.25157	LOC281376	Bos taurus serpin family B member 2 (SERPINB2), mRNA [NM_001192079]	CTAAACAAATGTCTAGCATTATGTATCACATACATGTGGCTGTAACTTATGTAAGGTTGC///AAAGAATGACCTGTTTCTGTCTGAAGTATTCCATCAGGCTTCGGTGGAAGTGAACGAGGA
A_73_P086136|507688	0.00108398	6.25154e-05	up	18.6538	18.6538	4.2214	GLDC	Bos taurus glycine decarboxylase (GLDC), mRNA [NM_001192951]	CACTGAAGAAATCTTTTTCCTCCTCCTAATTTACTCAATCTGTAATAGCATTTCTGAGTG
A_73_P064581|505184	0.00385179	0.000660453	up	17.582	17.582	4.13603	SERPINB2	Bos taurus serpin peptidase inhibitor, clade B (ovalbumin), member 2 (SERPINB2), mRNA [NM_001192051]	TTTATTGTGCACAAGATAACCAAGAGCATTCTCTTTTGGGGTAGATTTGCATCACCCTAA
A_73_P032056|540846	0.00411223	0.000732739	up	17.223	17.223	4.10626	ETV1	Bos taurus ETS variant 1 (ETV1), mRNA [NM_001046492]	TAAATATCCACTTGGAGACTATCTGCCTTGGGCATTTTCCCCCTAGCATTTCTGTGTCTC
A_73_107068|785576	0.00266288	0.000364304	up	14.3133	14.3133	3.83928	FGF21	fibroblast growth factor 21 [Source:HGNC Symbol;Acc:HGNC:3678] [ENSBTAT00000015438]	CTTTCGGGAGCTGCTTCTTGAAGATGGATACAACGTCTACCAGTCGGAGACCCTGGGCCT
A_73_P338001,A_73_116746|523822	0.000860842	3.46617e-05	up	14.0938	14.0938	3.81699	TNFRSF11B	Bos taurus TNF receptor superfamily member 11b (TNFRSF11B), mRNA [NM_001098056]	TTCTCAGGCGCTTGAGGAGGGAACAATGATTTCTTTCTCATCACCAAGGACTAGCTTTGA///ATCTGGTCCAGTATCTACTGCCTCTATTTTCTCTTGTTACTGCTTGCAGTAATTCAACTG
A_73_P035636,A_73_P205422|506412	0.00128369	8.95981e-05	up	13.66	13.66	3.77188	SAA2	Bos taurus serum amyloid A2 (SAA2), mRNA [NM_001075260]///Hw_liver_53_050812_F09 Bos taurus CF-24-HW liver cDNA library Bos taurus cDNA, mRNA sequence [DV784023]	TGATGCCAGAGAAAATATTCAGAGATTCACAGACCCTCTGTTTAAGGGTACGACCAGTGG///TTCTACTAATACTTCGCTTCCCAAGCATCCACCTCCCGTAGATATAAGGATACGCAATGA
A_73_106079|281735	0.000655957	1.31679e-05	up	13.6236	13.6236	3.76804	CXCL5	Bos taurus chemokine (C-X-C motif) ligand 5 (CXCL5), mRNA [NM_174300]	GTTAAAATTGTACTTTTTAAATGTATCTCAATGGTTTATAGTGCTTCTTTTGTTCTTTGG
A_73_113527|281368	0.00287823	0.000414164	up	11.9668	11.9668	3.58097	OLR1	Bos taurus oxidized low density lipoprotein receptor 1 (OLR1), mRNA [NM_174132]	TGTAGATAGTATTGTTATCATTTGTTGTTCTTATTTTCAAAGTCTTCTGCTAGTATGTAG
A_73_P287371,A_73_P052021|509585	0.00178925	0.000173744	up	11.881	11.881	3.57059	ACKR3	Bos taurus atypical chemokine receptor 3 (ACKR3), mRNA [NM_001098381]	GACTTTTCTGTGCTGCCTAAAGGTTTCATAATGGGGATTTGTATTTAAATCTTAAGACTC///CTTCCGTTTTGACTAAGGATGACATTAATTGTTAGCTGTTTTGAAAGCCTCTCTCTATAT
A_73_119163|533129	0.0102784	0.0027961	up	11.6577	11.6577	3.54321	ETV4	ETS variant 4 [Source:HGNC Symbol;Acc:HGNC:3493] [ENSBTAT00000010973]	CAGGCTCTGGGGTATCCAGAAGAACCGGCCAGCTATGAATTACGACAAACTGAGTCGCTC
A_73_P038001|281499	0.000509628	1.65091e-06	up	11.3122	11.3122	3.4998	SPP1	Bos taurus secreted phosphoprotein 1 (SPP1), mRNA [NM_174187]	GAAGACAAACACCTGAAAATTCGTATTTCTCATGAATTAGATAGTGCCTCTTCTGAGGTC
A_73_102135	0.0137081	0.00411044	up	11.1051	11.1051	3.47315		1264598 MARC 7BOV Bos taurus cDNA 5', mRNA sequence [DN521695]	GGGGCTGGGAAACAGAATGTATACTGCATGTTTGTTTCTCCTTTTGGGTGACAATGACAG
A_73_P103746,A_73_121270,A_73_P117406|404070	0.000629314	9.25937e-06	up	11.0436	11.0436	3.46514	MT2A	Bos taurus metallothionein 2A (MT2A), mRNA [NM_001075140]///Hw_loin_23_050701_B04 Bos taurus CF-24-HW loin cDNA library Bos taurus cDNA, mRNA sequence [DV797790]	GCGGGGAGAGCCTGCTCCCCGGTGTAAATAGAACAACGTGTACAAACCTGCATATTTTTT///CCTGAAGGCGGGGAGAGCCTGCTCCCCGGTGTAAATAGAACAACGTGTACAAACCTGCAT///GGATTGAAAAATGTTCTTAAACGCTTTTCCGCGAAACACCACAATCCCTTCCCCCTTTAA
A_73_P087826|100295476	0.00986442	0.00262737	up	10.5384	10.5384	3.39758	EREG	epiregulin [Source:HGNC Symbol;Acc:HGNC:3443] [ENSBTAT00000013571]	ATCGAAAAAGTAAAGAACCCAAGAAAGAATATGAAAGAGTGACCTCAGGGGATCCGGCAT
A_73_P050366,A_73_P111946,A_73_P150176|507988	0.00171225	0.000158283	up	10.5218	10.5218	3.39531	CYP3A4	Bos taurus cytochrome P450, subfamily IIIA, polypeptide 4 (CYP3A4), mRNA [NM_001099367]	GCTTGATTTACTTTGTGGTAAAACTCAGAAATAAAGACAGCCTTCATCTATTGCACTTGC///GCCTGAGGAGTTCCGTCCTGAAAGGTTCAGTAAGAAGAACAAGGACAGCATAAATCCTTA///TTGTGGAGAATGTCAAGAAGCTCTTAAGATTTAGTATCCTCGATCCCTTTCTTCTCGCAG
A_73_P399596,A_73_P060826,A_73_P397591,A_73_P060851,A_73_P060831,A_73_110703,A_73_P154997|281474	0.00109178	6.3887e-05	up	10.5115	10.5115	3.3939	SAA3	Hw_loin_34_050705_F11 Bos taurus CF-24-HW loin cDNA library Bos taurus cDNA, mRNA sequence [DV793268]///Bos taurus serum amyloid A 3 (SAA3), mRNA [NM_181016]	TTGTAGTTGGCTTCTTTCATGTCTTGGTAAGCTCTCCACATGTCTTTAGCCCCTTGACCA///ACTGACCTAGAGAGTTCTCTGTCCTCAGAAGGCAGCAGATCTAATAAATGCTCAAGAGAT///TTGTCTGCACCCCTGTAGTTGGCTTCTTTCATGTCTTGGTAAGCTCTCCACATGTCTTTA///TAAGTAACGCCAGAGAGACTATTCAGGGAATCACAGACCCTCTGTTTAAGGGTATGACCA///TGATCAGTAACGCCAGAGAGACTATTCAGGGAATCACAGACCCTCTGTTTAAGGGTATGA///GGCTGTGAGTCCCTAAGGGCAGAGACACTGACCTAGAGAGTTCTCTGTCCTCAGAAGGCA///CCCCAAGATCGAACCCGGCCA…
A_73_121188	0.00219437	0.000259337	up	10.4886	10.4886	3.39074		BE04006X1A02 Normalized and Subtracted bovine embryonic and extraembryonic tissue Bos taurus cDNA clone BE04006X1A02 5, mRNA sequence [CN436084]	CCCCATCTTTCAGAGTGATGTCATTTCTACATTTGATATGCTTGTATTTCTGTAGGATGT
A_73_120777|508869	0.00100015	5.13644e-05	up	10.2019	10.2019	3.35077	RND1	Bos taurus Rho family GTPase 1 (RND1), mRNA [NM_001046016]	AGTCGGGGGGAGGGGGGAGTGTTTCAATCTGTTCTATGTTCTGTGTTTAAAGAAGAAAAC
A_73_P031116,A_73_104460|286836	0.000852578	3.34846e-05	up	10.1521	10.1521	3.34371	DEFB4A	Bos taurus defensin, beta 4A (DEFB4A), mRNA [NM_174775]	CAGAAACTGCGCCCTTCAACACACCGTCTAAAATTTAAACGAGAATAAATTTTGTTCAAA///AAAGCTGCCGTTGGAATATGGGTGTCTGTATTCCGTTCTTGTGCCGTGTAGGCATGAGAC
A_73_P298116,A_73_118686|508692	0.000863518	3.4868e-05	up	10.0986	10.0986	3.33609	OSR2	Bos taurus odd-skipped related transciption factor 2 (OSR2), mRNA [NM_001034328]	TTATCTGCAAGTTTTGCGGCAGACACTTTACCAAATCCTACAACCTGCTCATCCACGAGA///TGTACCTTGTTGGATGCACCTAGGTATGGGAAATGGAAGCCAAATTTATCTTTAAAGACT
A_73_104856	0.00126541	8.66163e-05	up	10.0345	10.0345	3.3269		Rep: PEA3 protein - Canis familiaris, partial (41%) [TC473986]	CTGGGGTTTCACCTCCACTACATCTGCCAGATCCTAATAAAGGCCCCTGCTTCTCCTGTG
A_73_P040981|404071	0.000592948	5.59121e-06	up	9.98475	9.98475	3.31973	MT1A	Bos taurus metallothionein-1A (MT1A), mRNA [NM_001040492]	GCCCTGTGGGCTGTGCCAAGTGTGCCCAGGGCTGTGTCTGCAAAGGGGCCTCGGACAAGT
A_73_P103046,A_73_P167587|618238	0.0017978	0.000177875	up	9.92051	9.92051	3.31041	M-SAA3.2	Bos taurus mammary serum amyloid A3.2 (M-SAA3.2), mRNA [NM_001242573]///CR850558 Normalized and Subtracted bovine endometrium tissues (bcbp) Bos taurus cDNA clone bcbp0005.d.02 5', mRNA sequence [CR850558]	AGAGAGTTCTCTGTCCTCAGAAGGAAGCAGATCTAATAAATGCTTAAGAGATGGAAAAAA///TTTCCAGTAACGCAGAGAACTATTCAGGGATCACAGACCCTCTGTTTAAGGTATGACCAG
A_73_115013,A_73_103117|541166	0.00145404	0.000115557	up	9.9142	9.9142	3.3095	ETV5	Bos taurus ETS variant 5 (ETV5), mRNA [NM_001192834]	CATAGTCTATACATAGATGCATATTTTACCCCAAGCTGGCTAGAGGTTAATTTGTTGTAA///AATTTTAGGAGAAGGTGATTAACACTTTTGACAGTATTTTGTTTTGCTTTGATTCGGGGG
A_73_101129|407165	0.000757385	2.47312e-05	up	9.70486	9.70486	3.27871	LOC407165	LB03510.CR_L01 GC_BGC-35 Bos taurus cDNA clone IMAGE:8677971 5', mRNA sequence [EV679641]	AGTGAAAGGTCAAGAGCCAGTGAAAGGTCAAGATCCAGTGAAAGGTCAAGATCCAGTCAA
A_73_104964|538751	0.00279977	0.00039499	up	9.66333	9.66333	3.27252	AREG	Bos taurus amphiregulin (AREG), mRNA [NM_001099092]	CAGCAAATCCCAAGAAAACAGAACCTTTTCGTTCTGATGGTTTTAAACTTTCAATTGTCA
A_73_P035016,A_73_107706|280826	0.000738098	2.21444e-05	up	9.63972	9.63972	3.26899	IL6	Bos taurus interleukin 6 (IL6), mRNA [NM_173923]	TATCCTCATCCTGAGAAACCTTGAGAATTTCCTGCAGTTCAGCCTGAGAGCTATTCGGAT///AATGGCTATGTGGCTTGAATGTCCTTATTGTTTTGGAGACAAATCATTTCTTGAAATGTG
A_73_114984|281095	0.000760856	2.49314e-05	up	9.31948	9.31948	3.22025	CSF2	Bos taurus colony stimulating factor 2 (CSF2), mRNA [NM_174027]	CTGGCTTGTTCAGGGCCATGTTGACCCTGATACAGGTGTGGCAGGGGAAACGGGAAATGT
A_73_P467773,A_73_P102956,A_73_113931|510668	0.00152809	0.000126273	up	9.31558	9.31558	3.21965	CCR7	Bos taurus C-C motif chemokine receptor 7 (CCR7), mRNA [NM_001024930]	GCTTTCAGTTCATTAAGAGAGCACATTTTACTCATTACAAATAAAACTTTTCCCTGGAGG///TGTACGCCTTCATTGGCGTCAAGTTCCGCAGCGACCTCTTCAAGCTCTTCAAGGACCTGG///GCACATTTTACTCATTACAAATAAAACTTTTCCCTGGAGGAAACAACTTTAAAAGAAAGG
A_73_117821,A_73_P268996|533630	0.00054871	4.26275e-06	up	9.2052	9.2052	3.20245	PSPH	Bos taurus phosphoserine phosphatase (PSPH), mRNA [NM_001046355]	AAGAAGAAGGAATTGATGAGCTGGCCAAATTCTGTGGAGTTGAGGATGCCGTGTCAGAAA///ACACCTTCACTATTGGGAATGTGGATTAGGCAGCTTTAAATGAAATTGGTTTTCCCTTTA
A_73_100334,A_73_P089051,A_73_108732|518974	0.00100916	5.42296e-05	up	9.09592	9.09592	3.18522	ATP6V0A4	Bos taurus ATPase, H+ transporting, lysosomal V0 subunit a4 (ATP6V0A4), mRNA [NM_001205851]	GGGCTAAACTTTACAGGATTAGGAACTTTCTCATGAATTTTCACTCCAGGTGAGGAAGAA///AATGAGGGGAGTGGGAGTGCCAAACTCATGTTTTCATGTAATTAAACTTTTGGGGCATTC///TGGAGTGTCCAACCCATGTTCAGAAATGGCACGTGGAGTATGCAGGTATTGAAAACGAAT
A_73_P052466,A_73_P309571|540455	0.00054871	4.4109e-06	up	9.02465	9.02465	3.17387	PIMREG	Bos taurus PICALM interacting mitotic regulator (PIMREG), mRNA [NM_001099109]	GAAGCCAGTGTGTGACTTTCCTGGATCACACTGGTTTTTCATAATAAAGACTCTTTCTGT///CACACACTATTCAGTAGCGATTTCTGCCCTTTGTAAATTATTTAAGAAATCTGCTTTGTC
A_73_107945	0.0048962	0.000947711	up	8.88	8.88	3.15056		703941 MARC 6BOV Bos taurus cDNA 5', mRNA sequence [CB449724]	TCTATTTGACTTGTTTCCCAAGCACACTCTAGTAATTTTGTCTCTTAATGCATCTTGTGA
A_73_107799|534781	0.000559365	4.91754e-06	up	8.6029	8.6029	3.10482	PBK	Bos taurus PDZ binding kinase (PBK), mRNA [NM_001102178]	GACATGTCAGTTACCTGAAGGTGTATTATCCTATTTTGTACTCCATTGTATTGAGTCTTG
A_73_100846,A_73_P101186,A_73_P110031|281308	0.000573456	5.31359e-06	up	8.58599	8.58599	3.10198	MMP1	Bos taurus matrix metallopeptidase 1 (interstitial collagenase) (MMP1), mRNA [NM_174112]	ACAACTTCAGGAATGTATGAGCAACCACCACTACCATCCTGATACCCAAGGGACAACTTT///AATTTCCAAGATTATAACTTGTACCGGGTGGCAGCGCATGAATTTGGCCATTCCCTTGGA///AACCACCACTACCATCCTGATACGCAAGGGACAACTTTGTTATAAAGTGTTTTACGTTTG
A_73_107648|617047	0.00065224	1.08276e-05	up	8.57738	8.57738	3.10054	C27H8orf4	Bos taurus chromosome 27 open reading frame, human C8orf4 (C27H8orf4), mRNA [NM_001035490]	CAGTTACTGCAGTAAGCATTAGGAAGCGAATATGAGACACTTAATAGTTTATAAAGATGC
A_73_P134091	0.0108464	0.00301233	up	8.54963	8.54963	3.09586		Rep: GTP-binding protein Era - Methylobacillus flagellatus (strain KT / ATCC 51484 / DSM 6875), partial (6%) [TC468499]	CAGTATTTGAGAGAGAACGACGACAGAGCATTGCAAGGAAATAGTGTTTTATCCATTAAA
A_73_P042946|338034	0.000920955	4.18538e-05	up	8.39632	8.39632	3.06976	MYBL1	Bos taurus v-myb avian myeloblastosis viral oncogene homolog-like 1 (MYBL1), mRNA [NM_176635]	AGAAGATATTTGAGTACTTATACAGCTACAGGCAGCACTTCAAGAGCTCTCATACTGTGA
A_73_P031501	0.000655515	1.12491e-05	up	8.07781	8.07781	3.01397		Bos taurus chemokine (C-X-C motif) ligand 2 (CXCL2), mRNA [NM_001048165]	GTTAAGAAAATCATCGATAAGATGCTAAACAAGGCTAGTGCCAACTGATCAAGAGAGATG
A_73_P110576,A_73_P052371,A_73_P120886|281666	0.00065224	1.08561e-05	up	8.07357	8.07357	3.01321	CCL20	C-C motif chemokine ligand 20 [Source:HGNC Symbol;Acc:HGNC:10619] [ENSBTAT00000028430]///Bos taurus C-C motif chemokine ligand 20 (CCL20), mRNA [NM_174263]///C0009291L22.Q1KM13R KN510 M. bovis infected Bos taurus DC [FE011604]	AGAGTCAAAAGGATGTAAAAATGGATGCTCCCTGGAATGGAATTGGGCAGAGCCCAAGAA///ACATGCTCAGTCAAAGAGTCAAGAGGATGTAAAAATGGATGCTTTTTGGGATGGAATTGG///CAATAGCACTGACATCAAAGCAGCCAGGAGCAAATTCTTGCTGCTGCACATCATTTTCAA
A_73_P039036,A_73_P100786|783935	0.0026214	0.000353403	up	8.03733	8.03733	3.00672	DEFB5	Bos taurus defensin, beta 5 (DEFB5), mRNA [NM_001130761]	AATGAGGAGTCAGAAACTGCGCCCTTCAACACACCGTCTAAAATTTAAACGAGAATAAAT///AGTAGTAAGAAATCCTCAAAGCTGCCGTTGGAATATGGGTGTCTGTATTCCGATCTCGTG
A_73_P340221,A_73_104807|614893	0.000468303	1.16332e-07	up	7.7011	7.7011	2.94506	CDCA7	Bos taurus cell division cycle associated 7 (CDCA7), mRNA [NM_001037488]	GCCCCATGCCGTCCTTTTATTTCCAGTGATTTTCCTCCATCATTTAGTTTGGGAATCTTT///CTGTAGCTCTGCCGGTTCGGTTCAGTGTTTGGTGCATAATTGGACCTTGAATCAATACAT
A_73_P048841|504598	0.00235734	0.000295699	up	7.29664	7.29664	2.86723	SLPI	Bos taurus secretory leukocyte peptidase inhibitor (SLPI), mRNA [NM_001098865]	GCAGAAGAAGCCAACAAATGTCTGTTGACTTATCAATAAATAAATGAGCATGTTTCTCTC
A_73_P061596,A_73_119265|531389	0.00125151	8.34944e-05	up	7.15248	7.15248	2.83844	FOSL1	Bos taurus FOS like 1, AP-1 transcription factor subunit (FOSL1), mRNA [NM_001205985]	CAAACTGGAGGATGAGAAATCTGGACTGCAGCGAGAGATTGAGGAGCTGCAGAAACAGAA///TCTGAGAAGACTTTAGCTACAAGCCTCCACAGCGTGGGCAGCTGCTATTTATTTTCCTAA
A_73_P044296,A_73_120451|539159	0.000642332	9.85156e-06	up	6.99253	6.99253	2.80581	CTH	Bos taurus cystathionine gamma-lyase (CTH), mRNA [NM_001024567]	CTACTGGATGATCTAGATCAAGCTTTGAAGGCAGCTAACCCTCCAAATGCAAGTTCCAAC///CAGGTCAATTCTGTTCAGATCTTTTTATTAATTTTGATATACATGTGCCTCTGAAGGAGG
A_73_P100626,A_73_115413|286837	0.00324	0.000499392	up	6.93745	6.93745	2.79441	TAP	Tracheal antimicrobial peptide [Source:UniProtKB/Swiss-Prot;Acc:P25068] [ENSBTAT00000063757]///Bos taurus tracheal antimicrobial peptide (TAP), mRNA [NM_174776]	AAACAGATTGGCACCTGTGTTGGCCGGGCCGAAAAATGCTGTAGAAAGAAGTAAAAGAAG///AAGACACAGCCGGGATCAATGCCCAGTCAGAACGTGCGCCCTTTGACGGAGCGTCTAAAA
A_73_P031111|505518	0.000645456	1.01668e-05	up	6.86429	6.86429	2.77911	C15H11orf34	Bos taurus chromosome 15 open reading frame, human C11orf34 (C15H11orf34), mRNA [NM_001113538]	AGCTCGACTCAATATACCATAGTGACCTATAAGGGAAAAGAATCTTAAAAAGAGTGGATA
A_73_109696,A_73_P032806,A_73_P084511,A_73_P399386|530411	0.000655957	1.22823e-05	up	6.75314	6.75314	2.75556	UHRF1	Bos taurus ubiquitin like with PHD and ring finger domains 1 (UHRF1), mRNA [NM_001103098]	AGGAAGGAACAAAGTTGGACTTCTCAGTGTTTTTATTTTGGTTTTAAACAAAAAGCCTGC///CAGAACAGGGATATTTTTAAGTCACATAACTGCAGACAAACTGGAGCAATACTGTTTTAA///TTTCTGAGCAAAGTGGAGGAGACGTTCCAGTGCATTTGCTGCCAGGAGCTGGTGTTCCGC///CAACTCACCAATTGGGAATTACAAGAGGGAAACCTTTTAAAATGAATAAACACCTTTTCC
A_73_116071|504404	0.00183689	0.000184486	up	6.6983	6.6983	2.74379	BEND7	BEN domain containing 7 [Source:HGNC Symbol;Acc:HGNC:23514] [ENSBTAT00000027718]	CCCAAGAGACTGGGTTCAGATTCTGCAGGATCAAATCAAACTGGCGAGAAGAAGGTTAAA
A_73_105193|539466	0.000708225	1.97837e-05	up	6.59308	6.59308	2.72095	PPP1R3C	Bos taurus protein phosphatase 1 regulatory subunit 3C (PPP1R3C), mRNA [NM_001076164]	GGCTAGCACCCACAATTTTTCTAGTCTAAATATTTCACTCTTCTGTAGCTATCCTCTGTG
A_73_114392	0.00364059	0.000602563	up	6.55445	6.55445	2.71248		276080 MARC 3BOV Bos taurus cDNA 5', mRNA sequence [BF652500]	ATTGACAGCATTTGTAAGTGATTGTGCAATCTTGTGTAATGGTCTTTTGATTCTTTTGGG
A_73_P334656,A_73_P422111,A_73_110185,A_73_P270481|505080	0.000629314	9.4072e-06	up	6.4836	6.4836	2.69679	TGM3	Bos taurus transglutaminase 3 (TGM3), mRNA [NM_001101848]	AGAAGAAATAGAGCACCCTGTAAAGATCGCATATGCTCAGTACGAGAAGTACCTGAAGGC///ACTAAATCCCTGAATCCCGAAGAAGAAATAGAGCACCCTGTAAAGATCGCATATGCTCAG///CCCTGGGTCATTGTGGAGGTGCGGGGGATGATGGTTAGCCATCCATTGTGACACTCACAA///AAACGATCCCAAATATGTTGGCCGGGTTCTCAGTGCAATGATCAATGGCAATGATGACAG
A_73_115691,A_73_P045631|327679	0.000489803	7.53796e-07	up	6.42669	6.42669	2.68407	CCNB1	Bos taurus cyclin B1 (CCNB1), mRNA [NM_001045872]	GCAAAGGTGTAACTTGTGAACTTTGGAATACTACCTGCAAATAAAACTCCATGTGCCATC///GGAATACTACCTGCAAATAAAATTGGCACCATGTGCCATCTGTACATATTATATGTTACA
A_73_P052251,A_73_P117421|281667	0.000741523	2.31138e-05	up	6.41129	6.41129	2.68062	CCNA2	Bos taurus cyclin A2 (CCNA2), mRNA [NM_001075123]	CTCAACCCACCAGAGACACTAAATGTGTAACAGTGAAAAGACTGCCTTTGTTTTCTAAGA///AGAGATATACCCGCCAGAAGTAGCAGAGTTTGTATACATTACAGATGACACTTATACCAA
A_73_112747|618677	0.000912019	4.05751e-05	up	6.18523	6.18523	2.62883	GDF15	Bos taurus growth differentiation factor 15 (GDF15), mRNA [NM_001206298]	ATGGCCGCGTGTCACTCACGCCTTTTGACGACCTCGTGGCCAAGGACTGTCACTGCGTGT
A_73_107137	0.000677244	1.60528e-05	up	6.07348	6.07348	2.60252		4079280 BARC 9BOV Bos taurus cDNA clone 9BOV14_A01 5', mRNA sequence [CK964716]	GTCCTGCCTTGACGAGCACCGTGTTAAAACCTCCTCATATTGTGATGATTGGGCATTAAA
A_73_P038566,A_73_P351456|616965	0.000836901	3.11816e-05	up	6.0004	6.0004	2.58506	FAM72A	Bos taurus family with sequence similarity 72 member A (FAM72A), mRNA [NM_001101263]	CAACCAAAGGCATTTTGTCAGTAGTGATACCGAAACAGACCAAGTTATGATTTTGTAAAT///GGTTATCACATGTTATATTGGCGATAACTATGTTAATATGGAGCAAAACTGTGAATCAGC
A_73_119056,A_73_P160687|516864	0.0117063	0.00334626	up	5.93702	5.93702	2.56974	ALDH1L2	Bos taurus aldehyde dehydrogenase 1 family member L2 (ALDH1L2), mRNA [NM_001191391]	CTTAGGTGAGGAAGCTCTAAACGAATACCTCAAAACCAAGACTGTGACGTTGGAGTACTA///CAAATTTGAAGACTTCATCCAAAAGGTCGTGAGGAAACTGAGAGGAGAGGATCAGGAAGC
A_73_115534|101905331	0.00975778	0.00259184	up	5.92832	5.92832	2.56762	TUNAR	Bos taurus TCL1 upstream neural differentiation-associated RNA (TUNAR), long non-coding RNA [NR_131934]	ATCTCACGGGTTCCGTGTGGTTCTAGAAAGACTGTGTGAGAATTCTGAACAGTGTACACA
A_73_115487|100271839	0.000783216	2.69261e-05	up	5.88587	5.88587	2.55726	C23H6orf141	Bos taurus chromosome 23 open reading frame, human C6orf141 (C23H6orf141), mRNA [NM_001145653]	GAGTCATTACACTCCACTTGCTGATCTTATTCTTGTTGGTCATCACTAGCACTTGATGTG
A_73_115605|767985	0.000468303	5.236e-07	up	5.87776	5.87776	2.55527	CKS2	Bos taurus CDC28 protein kinase regulatory subunit 2 (CKS2), mRNA [NM_001113319]	CCTGTGCATGAGCTGTATTCTTCACAGCAACAGAGCTCAGTTAAATGCAACTGCAAGTAG
A_73_P088621	0.000468303	6.23786e-07	up	5.87036	5.87036	2.55345		anillin actin binding protein [Source:HGNC Symbol;Acc:HGNC:14082] [ENSBTAT00000046371]	CTTAAGAGCATCAGATTTGCTGGTTGCATTTTATGCTTTAAATACAAAAGGATATGTGCC
A_73_P032941|615857	0.000742775	2.33778e-05	up	5.8657	5.8657	2.5523	PRR11	Bos taurus proline rich 11 (PRR11), mRNA [NM_001098137]	TAACTCCCAGCAATGATCCATAAAATGTACAGATAAAATGACCCCAATCCTTTTGAAGTA
A_73_P251556,A_73_110397|282259	0.0036583	0.00060953	up	5.84174	5.84174	2.5464	IGFBP1	Bos taurus insulin like growth factor binding protein 1 (IGFBP1), mRNA [NM_174554]	TCATGCTTCTGTCTTAAAGAGCATAGGAAAATACTGCCTAGCAAGTAGCAATGATTTTTT///TATCTGCCAAACTGCAACAAGAATGGATTCTATCACAGCAAACAGTGTGAGACGTCGCTG
A_73_P337026	0.00412681	0.000736594	up	5.78812	5.78812	2.5331		Rep: YvfS2 - Bacillus licheniformis (strain DSM 13 / ATCC 14580), partial (11%) [TC416404]	CAAAAATTGGAGAGATCCCAAAAGAATTTCCTCAAAAATTCTTGTGGTTCTCTAGGTTGT
A_73_P100016,A_73_P047296|281496	0.000512795	2.90571e-06	up	5.77102	5.77102	2.52883	SOD2	Bos taurus superoxide dismutase 2, mitochondrial (SOD2), mRNA [NM_201527]	TTGACGTGTGGGAGCATGCTTATTACCTTCAGTATAAAAATGTCAGGCCCGATTATCTGA///CACCCCGTGGTCTTTAATTATTTTCTGATCACATGTTACATAGGGTAAACACTAACCATT
A_73_107734	0.000468303	4.16663e-07	up	5.67882	5.67882	2.50559		Rep: PREDICTED: E2F family member 8 isoform 3 - Pan troglodytes, partial (36%) [TC438982]	ATGGCCTCAGACTGATTTGGAGAACACATTCTCTGAAAATACTGTAAATACGTTGGGGGT
A_73_P047286|282521	0.000699123	1.82711e-05	up	5.64425	5.64425	2.49678	SERPINE2	Bos taurus serpin family E member 2 (SERPINE2), mRNA [NM_174669]	TTTTTCATCCGACATAATCCTACAGGTGCTGTCTTATTCATGGGGCAGATAAACAAACCC
A_73_113925,A_73_P116681|506132	0.00146937	0.000118305	up	5.5343	5.5343	2.4684	CH25H	Bos taurus cholesterol 25-hydroxylase (CH25H), mRNA [NM_001075243]	AGCATCTGATCTCTGTAAAAGTGAAGCATGGTCCTGCTGGGCAGTGACTCAGATTATTGT///TGCGCGGTTCCATTTAAGAAAGGTTAGTTTGCGGATCGCTGCTAGTTAGATCAATAGAGC
A_73_115779,A_73_P264276,A_73_114364|615850	0.00559495	0.00116122	up	5.48684	5.48684	2.45597	PTPN5	Bos taurus protein tyrosine phosphatase, non-receptor type 5 (PTPN5), mRNA [NM_001102293]	GTGGTATACGATGGCGTGGAGATCACCGTGCGGAAAGTCATCCACACTGAGGATTACCGG///ATTTCCTCATCTAGAAACTACAAGGAGTGAGAGCAAGAGAACCACACTGCTGATGACTCC///ACGGCAGACAGAGACATTTGGTGTCTTTTTATAATTTGCTCATGGTCATTGAATAGAGCA
A_73_104810	0.0006265	8.54893e-06	up	5.48627	5.48627	2.45583		Rep: Pulmonary surfactant-associated protein B - Ovis aries (Sheep), partial (16%) [TC463829]	TTCTGGTTAAAGTTTCAGAGTATGCAAGTATCACCATGAACCAAATGCTTTACAAGCTAT
A_73_P060081,A_73_P446826,A_73_P388821|513594	0.000853184	3.37689e-05	up	5.47407	5.47407	2.45261	CEP55	Bos taurus centrosomal protein 55kDa (CEP55), mRNA [NM_001205761]	TAAGTGCAATATCCAATATCCAGCCACCGAACACCGAGATCTACTCGTCCACGTTGAATA///TCAATCTCTGCCTACCTTGGAGCCAGTCGCCGTTCCCTGGCGCTCACTTTGTGCCTGTCC///GCAGATGTACAACATCTAGAAGATGACAGGCATAAAACAGAGAAAATACAGAGGCTCAAG
A_73_105265|613987	0.00768089	0.00185458	up	5.46604	5.46604	2.4505	TMEM100	Bos taurus transmembrane protein 100 (TMEM100), mRNA [NM_001046522]	TGTAATGATGTGTCAGATCATTAAAAAAGGTAAAATGTGTAGCTACTAGATCACATGGGG
A_73_103870	0.000694336	1.7335e-05	up	5.45726	5.45726	2.44818		PREDICTED: Bos taurus chromosome 23 open reading frame, human C6orf132 (C23H6orf132), mRNA [XM_015459822]	GGATGTGGACTCCCAGCTGTATCTTGCTCTGGGGTTGGCAGGGAAGGACTGATTCTCTCT
A_73_P289031,A_73_107653|504437	0.000512795	2.47575e-06	up	5.41746	5.41746	2.43762	AURKA	Bos taurus aurora kinase A (AURKA), mRNA [NM_001038028]	TGCCTTGTCTTACTGTCATTCAAAGAGAGTTATTCACAGAGACATTAAAGCAGAGAACCT///GCCATGAGAATCGTGCTAATAACTTCACTGGTTATAGAATCAATCCGCAGGCAAGGTTTG
A_73_P114061	0.0181649	0.00595152	up	5.37706	5.37706	2.42682		signal peptide, CUB domain and EGF like domain containing 2 [Source:HGNC Symbol;Acc:HGNC:30425] [ENSBTAT00000027416]	GCTGCCTCTAGTAGCAGTGACTGGTTAGAGTTCAATTTTTATAGATAATACAGGTATTTT
A_73_111885	0.000468303	4.99066e-07	up	5.35952	5.35952	2.4221		Rep: NUDIX hydrolase - Mesorhizobium sp. (strain BNC1), partial (12%) [TC447681]	TATTTATTTTTGGCAGTCTTGAAAGCTGGGTGATGTAATGAGCAGATATTTGGTTATCTG
A_73_P033841|507439	0.00054871	4.59754e-06	up	5.29214	5.29214	2.40385	NMUR2	Bos taurus neuromedin U receptor 2 (NMUR2), mRNA [NM_001035048]	AATGGGAAGAAAGAGAATATGGTGGAAGGTCCAAAGAGTCAACCTACACTACTTATTTGT
A_73_111202|617034	0.0215029	0.00740194	up	5.28809	5.28809	2.40275	CD83	Bos taurus CD83 molecule (CD83), mRNA [NM_001046590]	CTGGACAAGATCCCATGGTTTCTGCTTTTTCTGTTGTAAACCAAGAGGTTGTCATATGTG
A_73_115733|517539	0.00133307	9.756e-05	up	5.25755	5.25755	2.39439	MTHFD2	Bos taurus methylenetetrahydrofolate dehydrogenase (NADP+ dependent) 2, methenyltetrahydrofolate cyclohydrolase (MTHFD2), mRNA [NM_001075755]	AAGATCCCATAACTGCTAAACCCAAGTTGGTTGGAGATGTGGATTTTGAAGGAGTCAAGA
A_73_117937,A_73_P154547|280932	0.000854931	3.39682e-05	up	5.21457	5.21457	2.38255	SST	Bos taurus somatostatin (SST), mRNA [NM_173960]///LB02820.CR_K21 GC_BGC-28 Bos taurus cDNA clone IMAGE:8227343, mRNA sequence [DV911406]	ACCTCCCTAATCCCTCCAATCCTCAATAAGACCCTCGTGTTAGAAATTGAAGACTGTAAA///TGCAGAAACATTTGAGTTTTTAAAGCTTCTTTGTGTAATTTTGTGGCTGTAGCAACAGCC
A_73_P134601	0.00448696	0.000834346	up	5.19679	5.19679	2.37762			GGACGTGAGCAGCGCTTATCAGAAATGCGCTTCGGGAACTCCATCCTGTGATACAAACAG
A_73_107738,A_73_P425526,A_73_P333276,A_73_P452126,A_73_105268,A_73_P055396|282358	0.000573456	5.31638e-06	up	5.19071	5.19071	2.37593	SLC2A3	Bos taurus solute carrier family 2 member 3 (SLC2A3), mRNA [NM_174603]	AAATGGAAAAGCCTTAGTGCATTGCCTTGCATACTTAATAAATTATGTTGCTTGCGTTCA///GCATGGAATTTTTTCCAGTTCTCAGTGACCAGGTTGTGAATAATTTCCAAATGGATTTTT///GAAAGTCCTAGATTCTTGCTCATTAACAGAAAGGAGGAGGAGAAGGCAAAGGAGATCCTC///ATTGGAGGATGCATGATGTGGTGTATGAAGTTTGCACGTTGCCTCTTAACATTTCTATCC///CGCTCAGAGGATCCCAAGGCTGGGGTTAGTCGTTGTGTTCAATGGCTTTTAAAAATTCAT///TTCAAAGTTCCTGAGACCCGTGGCAGGACTTTTGAGGAAATTACACAAGTCTTTGAAGGA
A_73_120952	0.00230131	0.000282891	up	5.10511	5.10511	2.35194		Rep: LOC495153 protein - Xenopus laevis (African clawed frog), partial (9%) [TC448570]	GCTTGTGAAACGCAGTATGTGTTTTCGGTCAAAACAATAAAAGAGGTTTATTTTTCACTG
A_73_P226857,A_73_P416091,A_73_111747|514679	0.00054871	4.71946e-06	up	5.08279	5.08279	2.34562	KIF20B	Bos taurus kinesin family member 20B (KIF20B), mRNA [NM_001105258]	GGAACAAAAGGTTTCCATACGCCCATCATCTAAGAAAACTTATTCTTTACGGAGTCATGC///TGTGAAGTGTCGACAGAAAATAATCAAAGCACTCGATTTCCAAAACCTGAGTTAGAGATT///GTTGCATCAAATCCCTTTGTATATACATTGGTATTTTATACTGGTATAATTTTAATTCAA
A_73_113805,A_73_P320316|538789	0.00078895	2.75606e-05	up	5.05642	5.05642	2.33812	NDC80	Bos taurus NDC80, kinetochore complex component (NDC80), mRNA [NM_001206583]	CTCCTTACAATGAAGTCTCATGACCACATCCTCCCAAGCCCGTGAAGTATTTTTATAGCT///CAATGAAACAGGAGAATTCTCGACTACAGAATATTGTTGACAACCAGAAGTACTCGGTTG
A_73_121264	0.00175133	0.000165426	up	5.03809	5.03809	2.33288		Rep: A-kinase anchor protein 6 (Protein kinase A-anchoring protein 6) (PRKA6) (mAKAP). - Rattus norvegicus, partial (8%) [TC414419]	GCTGAGGAACTGTCTCCATCATCATACATGTAGAAAAAATATCTGAACATTTAAGTGGTA
A_73_P485558	0.000509628	1.89617e-06	up	5.01458	5.01458	2.32613			GTCATTAAAAAGGAGCATGTACTGGCTGCAGCAAAGAATTTTGTAAATGAATTTGAGTAC
A_73_P321311,A_73_108598,A_73_P041596,A_73_P154337|514407	0.012193	0.00353502	up	4.98062	4.98062	2.31633	GMFG	Bos taurus glia maturation factor gamma (GMFG), mRNA [NM_001024537]///960544 MARC 1BOV Bos taurus cDNA 3', mRNA sequence [CK772108]	ACCTGAACTCAAACCCCCTAGGGCCTGAACATCCCAAACCTTAAAGAAATTAAAATGCAA///CCCTAGGGCCTGAACATCCCAAACCTTAAAGAAATTAAAATGCAACAACTCAGAGACCCT///AACCCCCTAGGGCCTGAACATCCCAAACCTTAAAGAAATTAAAATGCAACAACTCAGAGA///AAGAGATGAATGTGCTTACACACCTCAAAACTAATGAAGATGGGGGTTTTGGGCCCTCAC
A_73_P117536	0.0205195	0.00697833	up	4.96007	4.96007	2.31036		LB0272.CR_I14 GC_BGC-27 Bos taurus cDNA clone IMAGE:8281816, mRNA sequence [DV887566]	GCTTAGATTGTAATGAATAGACCAGCCAGCCAGCCTAATCCATTAACTTGGGTCTGGGAT
A_73_108945|524925	0.000468303	6.08079e-07	up	4.92938	4.92938	2.30141	TTK	Bos taurus TTK protein kinase (TTK), mRNA [NM_001205913]	TATGTTCTGGGCCAACTTGTTGGCCTGAATTCTCCTAATTCCATTTTGAAAGCTGCTAAA
A_73_117641|509786	0.0019205	0.000200704	up	4.92794	4.92794	2.30098	BCL2L15	Bos taurus BCL2 like 15 (BCL2L15), mRNA [NM_001075417]	CTGAAGAAGAGATGGAGCTGTTTCCCAGCCTGAACAGAACTTCTTTGACTGATCAGATGA
A_73_P350516,A_73_P389096,A_73_P040976|282369	0.000667089	1.46831e-05	up	4.90457	4.90457	2.29413	SLC7A5	Bos taurus solute carrier family 7 member 5 (SLC7A5), mRNA [NM_174613]	TTTGAGACTGTTGGGGCCTCAGTTTTCTTGGGTGTACATGGGGCACTGCCCTCTGCCTCT///TTATCATCTCGCTCCCGATCGTCACCCTGGTGTACGTGCTGACGAACCTGGCCTACTTCA///GCTTTGGGATGGGGAGTTTTGTGTTTTGTTGGGGTAATTTGTTTTTTAAGAATTGGAATT
A_73_P499223,A_73_P066891|523367	0.00104838	5.84918e-05	up	4.90155	4.90155	2.29324	SHCBP1	Bos taurus SHC binding and spindle associated 1 (SHCBP1), mRNA [NM_001192579]	GACTTATTGTTGACTACCAAAATCTGTTGACTCAATGTGAGGAGAGTTACAGGAAATTTT///ATTGTGGGGAACCAGTTCAAGTGGAATGGGAAAGGGAGTTTTGGCACATTTCTTTTCTGA
A_73_110467	0.000782204	2.66133e-05	up	4.88437	4.88437	2.28817		Rep: LOC510809 protein - Bos taurus (Bovine), complete [TC397039]	TAGTATTGAGTGCTTGAAAATCTTAGAGGTTTTTCCATCCACTGTGTGGTTGAATCTTCT
A_73_117773|520351	0.000489803	9.88062e-07	up	4.85192	4.85192	2.27855	NXT1	Bos taurus nuclear transport factor 2 like export factor 1 (NXT1), mRNA [NM_001075805]	TTTTGAAGTAGTAAAATTCTCTATTTTTCTATTTGCCCAGGAGAGACTCTGGTTCTGGAA
A_73_107660|281061	0.000468303	5.52494e-07	up	4.79433	4.79433	2.26133	CDK1	Bos taurus cyclin dependent kinase 1 (CDK1), mRNA [NM_174016]	TGTGTTGTGTCAAGAGCAGATAATTGTACTTTTACTGTTCATCTCTGGTTTTGTCTTGTA
A_73_P109331,A_73_114692|280840	0.042793	0.017851	up	4.76553	4.76553	2.25264	LIF	Bos taurus leukemia inhibitory factor (LIF), mRNA [NM_173931]	ACGTCTTCCAGAAGAAGAAGCTGGGCTGTCAGCTCCTGGGGAAGTACAAGCAGGTCATCG///GCATGATTGTCTATTTATTTTGATGCCCTATTTATATTAACTTATTGGTGCTTCAAATGG
A_73_P209352	0.00837392	0.00208548	up	4.74915	4.74915	2.24767			ACTAAAACATTTCTTTCCTTAGTGCCTTGACCTTTTGGACGACCTCTTACGATAGCTGCC
A_73_P432521,A_73_P045826|510809	0.00178013	0.000171197	up	4.74206	4.74206	2.24551	MIS18A	Bos taurus MIS18 kinetochore protein A (MIS18A), mRNA [NM_001098010]	TCTACTAACTGTACGTGTGGCCACAAGAGCAAGTGGGGTGACTCCTCCCTGTTAGGCAGG///GGCTGTATTTGATGGTAAAGAGGTGATTGTTTCCTAAACTCCAGTTTTAAAGTCATGATT
A_73_P036237,A_73_P085581|508043	0.000655957	1.25933e-05	up	4.71778	4.71778	2.23811	PTTG1	Bos taurus pituitary tumor-transforming 1 (PTTG1), mRNA [NM_001034310]	TGTAAAAGGCACTGTCTTTGCAATTCTCTGAACATTCAACAATGGTGGGAGGAGGGCACT///ACTCTGGATGTTGAATTGCCACCTGTTTGCTGTGACTTAGATATTTAAATTTCTTAGCAC
A_73_P101016,A_73_103048,A_73_P101211|281914	0.000655957	1.29312e-05	up	4.71398	4.71398	2.23695	MMP13	Bos taurus matrix metallopeptidase 13 (MMP13), mRNA [NM_174389]	TATGCTTCCTGATGATGATGTCCAAGGGATTCAGTCTCTCTATGGTCCAGGAGATGAAGA///TGGAAAGCATTTGAGATAACACTTCCAGACATTTGGGGGGTGAGTTATGGGAGAAGGAGA///TGCATCCTCAGCAGGTTGAAGCAGAGCTGTTTTTAACAAAATCGTTTTGGCCAGAACTTC
A_73_P038251,A_73_P262576,A_73_P369076,A_73_102507|282291	0.000699123	1.80851e-05	up	4.70572	4.70572	2.23442	NFKBIA	Bos taurus NFKB inhibitor alpha (NFKBIA), mRNA [NM_001045868]	GTCTGACGTTATGAGCTTCAGAAAGAAGCTAAAAGAACATGGACTTGTATATTTGTACAA///AGGTGTGTGTTCCCCTCCTGTAAATAGTGTACATAGTGTATTTTGTCAGTAATTATTTTG///ATTGAAGTGTGGGGCTGATGTCAACAGAGTCACCTACCAGGGCTACTCCCCGTACCAGCT///GTGGGGTTAAAAGTCACTACCTGTCAAGGTGTGTGTTCCCCTCCTGTAAATAGTGTACAT
A_73_P113531	0.00169566	0.000155676	up	4.68995	4.68995	2.22957			TTCAGTAAAATGGCGGAAGAGAAGCTGACCCACAAGATGGAAGCCAATAAAGAGAACAGA
A_73_114779|508363	0.00875953	0.00221589	up	4.67492	4.67492	2.22494	CLSPN	Bos taurus claspin (CLSPN), mRNA [NM_001192177]	GCGCCTCAAAATAGATGATAGTACTTCAGAATCGAAGCAAAGCATCTTCCGTTACTTGGA
A_73_102392|100848433	0.000699123	1.85694e-05	up	4.66673	4.66673	2.22241	LOC100848433	PREDICTED: Bos taurus uncharacterized LOC100848433 (LOC100848433), miscRNA [XR_139278]	TCTTTGAATTGTTAGTTATTGATGGCCTCACTTATAAACACTAAATTCTGTCACCTCCTG
A_73_P172892	0.00255059	0.00033683	up	4.64684	4.64684	2.21625		Rep: Sodium- and chloride-dependent creatine transporter 1 - Rattus norvegicus (Rat), partial (3%) [TC414461]	CATAGTTGTTTGGTGATTGTTACCTGCAGAAAATAAAACTGAGCTTTTGTGCTGTCTCTG
A_73_103456,A_73_P458976,A_73_P115791|617914	0.000512795	3.55186e-06	up	4.64561	4.64561	2.21587	MAFF	Bos taurus MAF bZIP transcription factor F (MAFF), mRNA [NM_001103300]	TTTTCTGACTTACAGTAAGCGAGTTATCCGCCTTCTGTATTTTGTAGACTTCCTGAATAA///GTACCTTCTGCGAACATGTCTGTGGATCCCTTATCCAGCAAAGCGCTGAAGATCAAGCGT///TTATCCAGCAAAGCGCTGAAGATCAAGCGTGAGCTGAGCGAAAACACGCCGCACCTGTCG
A_73_P203092	0.00129386	9.10962e-05	up	4.62712	4.62712	2.21011		GB	GAGAACATCTGCAACAACTCCCGAGAGAAGATCTATAACCGTTCATTGGGGTATTATTAA
A_73_P031796,A_73_P504623|505455	0.00133168	9.66181e-05	up	4.60159	4.60159	2.20213	IER3	Bos taurus immediate early response 3 (IER3), mRNA [NM_001075202]	TTTATTTTAACTTATGCAGGAGTGCGAGATGTGCACCTTGCTGCAAATGCAGGTCTCTGG///GTGGGGAATGAGTGCGTCGTTAACTTATTTCTCATTGCTCCTAAATATATTTATGTGTAT
A_73_101185,A_73_P297471|515158	0.000568571	5.12831e-06	up	4.59342	4.59342	2.19957	SPDL1	Bos taurus spindle apparatus coiled-coil protein 1 (SPDL1), mRNA [NM_001076854]	ATTGTCTTTATCTGAGGATACCTTCTTGCAGCCTATTTTCCTTCTACTCATTGTGCCGGG///AGAGCGAGAGAAAGAAGCGGTTTCTTACTATGATGCCTTAGAGAAAGCTCGTGTAGTGAA
A_73_106768,A_73_112104|617811	0.00054871	4.65827e-06	up	4.59144	4.59144	2.19895	ARHGAP11A	PREDICTED: Bos taurus Rho GTPase activating protein 11A (ARHGAP11A), mRNA [XM_870134]	GGTTCTCCCAAAAATCCTATTGGAAAACTTCAACTACTACCAACAAGTAAACCTGTAGAC///AGGCTGCTTCTCTCCTAAAATCAGCCGTAAAGAAAAGGTTCGAAGATCTCTTCGTTTGAA
A_73_118484,A_73_P104066,A_73_P069766,A_73_P330406,A_73_P348881|514739	0.000738098	2.23504e-05	up	4.57271	4.57271	2.19305	MAP1B	Bos taurus microtubule-associated protein 1B (MAP1B), mRNA [NM_001206119]	GTGTGCAATATCCCCTCTTCCATTGAGGATATTTGATGTAAAAGAAAAAAGAATCAGTTC///TGAAAAAAGACAAACCTGTGAAAACCGAGACCAAACCTCCAGTGACAGAAAAGGAGACGC///CTCAACATCATGGTTTTAGCAAGCAGCAGCACAGTGGTTATGCAAGATGAATCCTTCCCT///AAACAAGTAAAACTGAAACAGAGGGCTGACAGCCGTGAGAGTTTGAAACCAGCCGCAAAA///AAAGTTTTGTCTCCATTACGGAGCCCTCCCCTAATTGGATCCGAGTCTGCATATGAAAGT
A_73_P032451|511845	0.000515165	3.58956e-06	up	4.50933	4.50933	2.17291	ABL2	Bos taurus ABL proto-oncogene 2, non-receptor tyrosine kinase (ABL2), mRNA [NM_001143855]	CCTGTCCTTAACAACTTACTGTCATGTGTACAGGAAATCAGTGATGTGGTGCAGAGGTAG
A_73_P043661|787125	0.000468303	3.6583e-07	up	4.506	4.506	2.17185	CENPW	Bos taurus centromere protein W (CENPW), mRNA [NM_001111261]	CTGCAGCAAAGGTAATTCTAAAGAAGAGCAGAGGTTAGAAGTCAAAGAACACATATTTGA
A_73_P039786,A_73_P328201|281668	0.000629314	8.94064e-06	up	4.50177	4.50177	2.17049	CCNB2	Bos taurus cyclin B2 (CCNB2), mRNA [NM_174264]	AAGTATGCAAGCAGCAAACTCCTGAAGATCAGCACGATTCCTCAGTTGAACTCAAAAGCC///TCAGCTCTGCAGTGACTACGTAAAGGATATCTACCAGTATCTAAGGCAGCTTGAGGTTCT
A_73_104677|614675	0.00122796	8.00071e-05	up	4.49476	4.49476	2.16825	PDLIM1	Bos taurus PDZ and LIM domain 1 (PDLIM1), mRNA [NM_001035455]	CTCTGCTGCAAATGGACATCAGCCAAATTCAAACCAAACTGAATTTAATATGTCTGATGA
A_73_106148,A_73_P496078|505165	0.000489803	1.04183e-06	up	4.47633	4.47633	2.16232	RRAD	Bos taurus RRAD, Ras related glycolysis inhibitor and calcium channel regulator (RRAD), mRNA [NM_001045913]	ATGCCCTGGAGGGAGGCTGTTCAGTGCAGTGGCTATTTGTTTACATGCAGATTTTTGTAA///TTTGACTGCAAGTTCATCGAGACGTCGGCTGCACTGCACCACAACGTCCAGGCACTGTTC
A_73_117177,A_73_P082991,A_73_P269401|508167	0.000509628	1.72641e-06	up	4.45263	4.45263	2.15466	RRM2	Bos taurus ribonucleotide reductase regulatory subunit M2 (RRM2), transcript variant 1, mRNA [NM_001244181]	ACCACAAGGCTGTAGGAAGACATCAGACTCACTGCTTCTGAGCAGATTTTAAAGTTTACT///AATACGGATATTGAGTACTGCACAAGTGTTCAGTGATTTCAATAAAACTGTTCTTGTGTC///TGAATTGCACTTTGATGAAGCAGTACATTGAGTTCGTGGCAGATAGACTTATGCTGGAGC
A_73_104613,A_73_P381176|508271	0.000667089	1.46882e-05	up	4.44569	4.44569	2.15241	DSN1	Bos taurus DSN1 homolog, MIS12 kinetochore complex component (DSN1), mRNA [NM_001100323]	GAAGTGAACAGTAGCGTGGAGTTATACCTCAGTGTTAACAGCCAATAAAACAGCAACTAA///ATAAATCGTCTGCCTCCCTGAAGAGGACTGAACGTGTTTCAAAGGAACGAATTCACCTTG
A_73_P134721,A_73_P074601,A_73_P035216|783871	0.000655957	1.26084e-05	up	4.42206	4.42206	2.14472	PI3	Bos taurus peptidase inhibitor 3, skin-derived (SKALP) (PI3), mRNA [NM_001080353]	TCAAAGGACAAGATCCAGTCAAAGGTCAAGATCCAGTCAAAGGACAAGATCCAGTCAAAG///CAAGATCCAGTGAAAGGTCAAGATCCAGTGAAAGGTCAAGATCCAGTCAAAAGGCAAGAC///CTTGAGCATGGACTGCCTCCCTCATGGACTTTCCAATAAAAGACTGCTTTCAACTCCAAA
A_73_P362936,A_73_P483443,A_73_101534,A_73_P276621|506294	0.00078895	2.74496e-05	up	4.41634	4.41634	2.14285	KIF22	Bos taurus kinesin family member 22 (KIF22), mRNA [NM_001101868]	AGAGATCTACCAGGAAAAGGTATTAAACCTCTTGGAACCTTCATCGGGAGACCTGGTGAT///AATGAGAGCCTGCAGCTTCCTGTCTTGGCACCTGTTAAATTGTCTCAGAAAGAACTGCTA///CCTTCAGCCAGGTTGAGGACCTGGAACGCGTGGAGGGTATATCAGGGAAACAGATGGAGT///TGGAAATTGAGAGGCTTAAGATGAAGCAAAAAGAACTAGAAGCCAAAGTGCTGGCCCAGG
A_73_P440816,A_73_106263|518752	0.000509628	1.60304e-06	up	4.40186	4.40186	2.13811	ARG2	Bos taurus arginase 2 (ARG2), mRNA [NM_001017942]	ACCAACTTCCAACTCCCAGCTCACCAGATGAATCAGAGAGTGAAGAACGTGTAAGAATTT///TAGTACTGTACTGTATTTGGTTTTTTGACGCTCACAGGGTATTAATATGTTGGAGCGCTA
A_73_P071821,A_73_120143|506390	0.000964329	4.76232e-05	up	4.3931	4.3931	2.13524	EXO1	Bos taurus exonuclease 1 (EXO1), mRNA [NM_001304987]	GAGTCCTGTTTGGAAATGAGGCCATTCTGAAAGATTTGTTCTTAGATCTATGCTATTTAT///GTAGTTGGAAGGGTTAAAGATCACTGCATAAATGGGACAGTGCTCTGTCATCCCTGAAGA
A_73_P120931	0.0142907	0.00434387	up	4.3821	4.3821	2.13162		LB0307.CR_L03 GC_BGC-30 Bos taurus cDNA clone IMAGE:8134805, mRNA sequence [DV934598]	GTGTGCGTAAATGACAAGGAACTTAGGTGAATTTTCTTAGGGAGTGAGTCGGTAGTGTGA
A_73_P302166,A_73_P195587,A_73_P030881|525136	0.00217582	0.000253305	up	4.36485	4.36485	2.12593	POC1B	Bos taurus POC1 centriolar protein B (POC1B), mRNA [NM_001099031]	GTACCCTTAAGGTGAAATAATTCACCTACCTCTAAAATAGCATTTTATGTGCAGAGAATG///TGTAACCGATTTGCAGACCTCTACTCCCCCTGTTGTGGACATCCTTTCTTTTGATTCTAC///GGTACCTGAATGTAAGGACTTTAAAAGAACATTTATTGGCATCATTGTCTACCTGTTTCT
A_73_P080246,A_73_P080251|286815	0.000700634	1.90012e-05	up	4.36013	4.36013	2.12437	GCH1	GTP cyclohydrolase 1 [Source:HGNC Symbol;Acc:HGNC:4193] [ENSBTAT00000009020]	TGGTTGAAGCAACACACATGTGCATGGTAATGCGAGGAGTGCAGAAAATGAACAGCAGAA///CCTGGAGGGCGGCCACGGCCATGCAGTTCTTCACCAAAGGCTACCAGGAAACCATCTCAG
A_73_105892	0.0371668	0.0149425	up	4.35833	4.35833	2.12378			TGGTTTTCGGACTCTGCTGGCGCCTGTTCACCTTGTGCTGTTGGTGGACGTTTGGCTGAT
A_73_107600	0.00389353	0.000671757	up	4.34877	4.34877	2.12061		Rep: neuralized-like - Gallus gallus, partial (13%) [TC421248]	TGTTAGTGTGAGGGTAGTTGCTGCCTCCTTTGTGAACTTGGATCACCGTGATTGTGAATA
A_73_117049	0.000704573	1.93331e-05	up	4.33753	4.33753	2.11687		Rep: PREDICTED: NIMA (never in mitosis gene a)-related kinase 2 isoform 3 - Macaca mulatta, partial (14%) [TC418342]	TGAGCTTTCATTTGTCCCCCTCTTTCTCACTAAATAAAAGGATTGGTTAGTTCTCCAAAA
A_73_P046036,A_73_105828|281402	0.000654701	1.10995e-05	up	4.31474	4.31474	2.10927	PIM1	Bos taurus Pim-1 proto-oncogene, serine/threonine kinase (PIM1), mRNA [NM_174144]	GTAAATGTGTGTACAGTTGGCATGGTAGTGTACAAAAGGATTGTAGTTGATCTAATTCTT///TGTGTTCTGAGCAGCATGTAGCCTGCTGGTTTTATCTGAGTGAAATACTGTACAGGGGAA
A_73_P353321,A_73_100444|507498	0.000622805	8.03512e-06	up	4.29849	4.29849	2.10383	CKAP2L	Bos taurus cytoskeleton associated protein 2 like (CKAP2L), mRNA [NM_001098901]	TCAGAACAGGATGGTCATCCTGGTATCAAATTACAGATCGCCCCAATCCCTCGGATAAAT///ACCTAAGCCCCAGAGACTCCCCATTTGCCTTTCCCAATCAGAATCAGTGTAAATATAATG
A_73_119746,A_73_P043186|519504	0.000966475	4.7921e-05	up	4.29015	4.29015	2.10103	NUF2	Bos taurus NUF2, NDC80 kinetochore complex component (NUF2), mRNA [NM_001099011]	TCTTTGGCAATATAAATCTTCTGTGGACAAAATGCAGCAGTTAAATACTGCACACCAGGA///GCAGGTATTCATGTCTCTGCTCCTTTTGTAAGTAGTGGTTGAAATAAACAATTGCATTTG
A_73_112820	0.0182132	0.00597217	up	4.28904	4.28904	2.10066		715751 MARC 6BOV Bos taurus cDNA 5', mRNA sequence [CB457642]	AAATCGTTTTGACTCCAGAGTTTACCTAGTCTGGTTCCACTACCATAGTTATGTGCAGCT
A_73_P052376|338078	0.0167936	0.00537823	up	4.28468	4.28468	2.09919	STC1	Bos taurus stanniocalcin 1 (STC1), mRNA [NM_176669]	AACTAAGGGGGTAGAAGTAGTTTTACTCAACATCAAAACTTAAGATGGGCCTGTATGAGA
A_73_P111571,A_73_P254341,A_73_117206|513055	0.00149019	0.000121366	up	4.25598	4.25598	2.08949	RGS2	Bos taurus regulator of G-protein signaling 2, 24kDa (RGS2), mRNA [NM_001075596]	GCCAAAACTGTCCTGATGGCAGCTAAACTTTGAAGTGGTCTTTGAATACTTTTAATAAAT///GCAGGAGCTTAAGACTGAAAGATAACAATGTAACACTATTGGTCCAGAAGCATTTACAAT///GTACTAGAATGAGTGCTTTTGTGTAGAAAATGACAATGTCCATTATGAGTGCCAAAACTG
A_73_102874	0.000509628	1.52648e-06	up	4.25513	4.25513	2.0892		Rep: MGC139093 protein - Bos taurus (Bovine), complete [TC393173]	TCAAGCGTTTATAAGACTAAGTGGCACTGTATATTTTATAACCTCGTTGAGAAGACTAAG
A_73_103769	0.0357628	0.0142134	up	4.24681	4.24681	2.08638		Rep: Mucin 13 - Sus scrofa (Pig), partial (96%) [TC421120]	AGTCTTTCTTTAATGTTAACAGTATCCTTGCTTGTGTCTAATGTCCTGTCTCCGTGCAAG
A_73_P054461	0.000798917	2.82976e-05	up	4.24292	4.24292	2.08506			TGAATGGAGTTCCTCTCACGATCTTTGATGAGGAGAGGAAGCTTGAGCAGCTATTACATG
A_73_P165872	0.0221829	0.00771792	up	4.22995	4.22995	2.08064		C0009283F22.Q1KM13R KN510 Bos taurus rectum from E. coli unchallenged animals Bos taurus cDNA clone C0009283F22 3', mRNA sequence [FE005800]	TCAACATAGATCAGAGTAGACATTCTGGATCAAGTTCGGAGTAACGGCCAAACTCTCGCA
A_73_108119	0.000609441	7.64834e-06	up	4.22752	4.22752	2.07981		CR451603 Normalized and Subtracted bovine embryonic and extraembryonic tissues (bcaz [CR451603]	TGTGTGACATCACATGTTAAGAATTCCTGCTCTAGAGTAGTAGCCTTCAAAATTTGAAAG
A_73_114117	0.00521701	0.00104455	up	4.21876	4.21876	2.07682			ATCTTCCCATTTCCTATCTTTTTGTATCTGAAGTCTTCCTAATGTACTGCACAAACCATG
A_73_P068391	0.0313503	0.0120506	up	4.20806	4.20806	2.07315		calcium voltage-gated channel auxiliary subunit gamma 8 [Source:HGNC Symbol;Acc:HGNC:13628] [ENSBTAT00000009879]	AGAAGAACCACTACTCATACGGCTGGTCCTTCTACTTCGGCGGGCTGTCGTTCATCCTGG
A_73_111881,A_73_P406311|506404	0.00159632	0.000139897	up	4.20515	4.20515	2.07216	CENPK	Bos taurus centromere protein K (CENPK), mRNA [NM_001192093]	CATGACCCATATGTCAAAATTAGTGATTCTTTTTGGCCACCTTATATTGAACTGCTCCTG///ATTCCCCTGAATGAAGAAATTCTGGTAACGTTAGGAAAAGAAGAGTTCCAAAAATTGAGA
A_73_115772|539797	0.0198112	0.00666204	up	4.20157	4.20157	2.07093	RTKN2	Bos taurus rhotekin 2 (RTKN2), mRNA [NM_001192310]	TCCAAGGCAGAAAACTATCAAAGACATTTTGGACCCTAGATCATGGTGGTGGACGCAAGT
A_73_112872|540641	0.00230289	0.000283347	up	4.18552	4.18552	2.06541	NOCT	Bos taurus nocturnin (NOCT), mRNA [NM_001082454]	GCATGCCCTTGGGAAGGAACCCCGTTAGCTCACATTAAAACCTTTTCCATTAAAACCTAC
A_73_100890,A_73_115302|531476	0.000740076	2.27859e-05	up	4.17998	4.17998	2.0635	JDP2	Bos taurus Jun dimerization protein 2 (JDP2), mRNA [NM_001193245]	GACCGACAGCGTCAAGACACCTGAGTCAGAAGGCAACCCTCTGCTTGAGCAGCTTGAGAA///GGGAGGGGGTGGGGTGTGTTTCCATCCTGGTAAACCCTTCATAGTACTCAGTCCTGTATC
A_73_P072416,A_73_P151666,A_73_P321236|533089	0.00278771	0.000392758	up	4.17403	4.17403	2.06144	CENPF	Bos taurus centromere protein F, 350/400kDa (CENPF), mRNA [NM_001256586]	ATGCAGAAGATGCTGAATTTGAGCCAGAGGGGCTTCCAGAAGTTGTAAAGAAAGGGTTTG///GTTTTTATGTGGATTCTACACTAAAAAATGCAAGTAACATTTTCTTGCAAGGGACAGCTC///CAAGTGAATAAACTTCAAGAACTCCAACTGCAACTGGAGAAAGCAAAAGTGGAATTAAAT
A_73_P069431,A_73_P104361|507661	0.00109178	6.37535e-05	up	4.16788	4.16788	2.05931	MIS18BP1	Bos taurus MIS18 binding protein 1 (MIS18BP1), mRNA [NM_001244171]	GGTATTGGAAAACTTTTCACAAAGGCTATGGAGTCTTTAGATGAAGAAGAGAACGATTAT///CCTCTGTTTATATAGTACATTACTCACCCTTTCTCTCCAGTTAGGTTGTTCAAATAAAGT
A_73_101638	0.00552354	0.00114019	up	4.14804	4.14804	2.05243			GACAGCAACTTCATAGTTGGAGAATGATGTCTCTTCAAACTGCTTTTGATAAGCAGAAGA
A_73_117353|527854	0.000677244	1.60388e-05	up	4.14717	4.14717	2.05213	KIF20A	Bos taurus kinesin family member 20A (KIF20A), mRNA [NM_001046288]	AGCACTCCCCACAGGTGGGTCTGCTGCTCAGTTTAAGAAACAGGTTTCTTTAAAGCTTTA
A_73_112965	0.000509628	2.12753e-06	up	4.13322	4.13322	2.04727		Rep: MGC148774 protein - Bos taurus (Bovine), complete [TC396507]	CCTCTTTTTTAGAGTGTATTTCCCAAAAAAGTATCCTTGGTGAAGTTTTGCTTGTTTTCC
A_73_P409606,A_73_P041301|514209	0.000877613	3.62642e-05	up	4.122	4.122	2.04335	ASNS	Bos taurus asparagine synthetase (glutamine-hydrolyzing) (ASNS), mRNA [NM_001075653]	TTTGACAATGCCGTTAAGAAACGTTTGATGACCGACAGAAAGATTGGCTGCCTTTTATCA///TAGGATTTTACAGGACTATATTGAACATCAGGTTGATGATGCAGCGATGGCAAGCGCAGC
A_73_110222|517587	0.00528589	0.00106438	up	4.11504	4.11504	2.04091	INHBE	Bos taurus inhibin beta E subunit (INHBE), mRNA [NM_001205842]	TCTACCTTGACCGTGATGGCAACGTGGTCAAGACAGATGTGCCGGATATGGTGGTAGAGG
A_73_101535	0.00120245	7.68642e-05	up	4.10904	4.10904	2.0388		DEP domain containing 1 [Source:HGNC Symbol;Acc:HGNC:22949] [ENSBTAT00000040383]	AACCTCTGAAAGTGAAGCAGCACTTTTCGGTGACAAACCTACAATCAAGCAACCAATGCT
A_73_P311171,A_73_P033556,A_73_P323316,A_73_P331891|507226	0.000974645	4.89524e-05	up	4.10841	4.10841	2.03858	TPX2	Bos taurus TPX2, microtubule nucleation factor (TPX2), mRNA [NM_001098898]	CGAAGAACTAAAACAGCAGAAAGAAGCAGCTTGCTTCAAGGCTCGTCCAAACACTGTCAT///AGCCTCTGTATCAGCGCAGTGTAATTTCTATTGCCCTTATCCCACCTCTCTTTTTCTATT///ATTTGGAACAGAAGGAAAAGCAGCATGTAAAAATGAAAGCCAAGAGATGTGGTACTCCTG///CATAGATTCCTGGTTTGATGAGAAGGCTAATCTGGAGAATAAGTTTACTGGGAAGGATGG
A_73_111540,A_73_P463231,A_73_P030861|507703	0.000509628	2.10201e-06	up	4.10054	4.10054	2.03581	SKA1	Bos taurus spindle and kinetochore associated complex subunit 1 (SKA1), mRNA [NM_001075327]	TTATAACATAATGTCCTTGTGAGCTTTTGAACCAGCTAACAGGGTTTAGAGACTGTTCCT///TACCCAGAACTTTGTTAACGGATCAGATCTTGACCCTGAAGAACCGGTCAAAGTTGAGGA///CTTTTGAACCAGCTAACAGGGTTTAGAGACTGTTCCTATAGTTTGCTTACATGTAATATT
A_73_P073241,A_73_101019,A_73_P283071,A_73_P082986|281365	0.00102679	5.61429e-05	up	4.08208	4.08208	2.0293	ODC1	Bos taurus ornithine decarboxylase 1 (ODC1), mRNA [NM_174130]	TTACTGCTGCTTCTACCTTCAATGGATTCCAGAGACCCACCATCTACTATGTGATGTCAG///CACCAATGTGGAAGACTGGGAGATGGGGTCACACTTATCTGTGTTCCTATGGAAACTATT///AAAGAGCTAGATATTGATGTCATTGGTGTCAGCTTCCACGTGGGAAGTGGCTGTACTGAT///ATGCTCTTTGAGAACATGGGTGCTTACACTGTTGCTGCTGCTTCTACCTTCAATGGATTC
A_73_107743	0.00800854	0.00196829	up	4.06701	4.06701	2.02397		Rep: Cell division control protein 6 homolog (CDC6-related protein) (p62(cdc6)) - Homo sapiens (Human), partial (24%) [TC452408]	CCGCTTCACAAAGGTACAACGACCTGCTTCTTTGGGACATTGCTTTTAATTGTCCTGCTT
A_73_104390	0.000877613	3.65708e-05	up	4.06149	4.06149	2.02201		Rep: Noelin precursor - Rattus norvegicus (Rat), complete [TC402099]	TGGTTTCCAAAGGGAAAGAAATGCTCCTGTGGGCAGCAGTGTGCGGAAAGTACATTTTTT
A_73_120945,A_73_P448166|508561	0.000667089	1.50679e-05	up	4.05994	4.05994	2.02146	FAM83D	Bos taurus family with sequence similarity 83 member D (FAM83D), mRNA [NM_001083393]	AAACTCAAAACTCTGTTTCTTAGGTGTGTCCCTTCTTGAGGATATCTGTGTTCTTAGCAT///AACTACCTCAGTTTTAATTCTGGAAGTTTTGCCAGATCATCCGCTAACTTGCTGGCGGTT
A_73_110958	0.00106072	6.01087e-05	up	4.03711	4.03711	2.01332		PREDICTED: Bos taurus microtubule associated serine/threonine kinase like (MASTL), transcript variant X1, mRNA [XM_010811135]	CATTGAGGTTTTCTGCATACTTACCCACCAAAAGAGAAAAACTCAAATTTAAATGTACCG
A_73_P030711,A_73_P248641|768319	0.000690961	1.69259e-05	up	4.02712	4.02712	2.00975	MT1E	Bos taurus metallothionein 1E (MT1E), mRNA [NM_001078134]///LB0041.CR_D11 GC_BGC-04 Bos taurus cDNA clone IMAGE:7961629, mRNA sequence [DT829120]	GTCTCTTACTACCTTGATGCGATACGACATTCCTTTTTCTATGAAATATGTGAATTGCAA///AGACTCTAATTTTGAATGGAGAGTACTGAGGCTCCAGACTATCCTTGTTGTCCTCAGCCA
A_73_P304291	0.00561938	0.0011696	up	4.02509	4.02509	2.00902		Hw_loin_66_050829_D04 Bos taurus CF-24-HW loin cDNA library Bos taurus cDNA, mRNA sequence [DV793344]	TCTGTGGTATTTGTGACAAAATGGGAAGAAGAGACATAGTGATTAAGGCCTAGTTGGTGG
A_73_P060361|507061	0.00230455	0.000284605	up	4.024	4.024	2.00863	DUSP5	Bos taurus dual specificity phosphatase 5 (DUSP5), mRNA [NM_001304282]	TTACCTCATGAAGACCAAGCAGTTCCACCTGAAGGAAGCCTTTGATTACATCAAGCAGAG
A_73_100990,A_73_P088256|540444	0.00170039	0.000156248	up	4.0231	4.0231	2.00831	HMGB2	Bos taurus high mobility group box 2 (HMGB2), mRNA [NM_001037616]	TTGTGTATGGTAGCACAGCAAACTCATAGAAATTAGCATCAATAGCAACTTTTGGGTTTT///CTAAGCTAAAGGAGAAATACGAAAAGGATATTGCTGCATACCGTGCCAAGGGCAAGAGTG
A_73_113998|540874	0.00292328	0.000425301	up	4.01185	4.01185	2.00427	DEPDC1B	PREDICTED: Bos taurus DEP domain containing 1B (DEPDC1B), transcript variant X1, mRNA [XM_005221501]	CACTAAAAAACCCCTTCCAACCATTTCAAAGAACTAGAAGTTTTCGGATGTAATACTTGG
A_73_P085155	0.0244266	0.00875142	up	4.00964	4.00964	2.00347		Rep: PREDICTED: PHD finger protein 15 - Pan troglodytes, partial (24%) [TC413183]	AGATATTCCACCTGCAGATGAAACTTATCGAACAGGATCTGTGTCGAGGTCTGTCTACCT
A_73_106599	0.000509628	1.96379e-06	up	4.00549	4.00549	2.00198		Rep: MGC148979 protein - Bos taurus (Bovine), complete [TC393345]	ATACACAGTAGTAGGACTCCTCTCACACATAAATACCACCAGTAAAACTGTTTTGTAAGT
A_73_P103706,A_73_P232472,A_73_119214|540737	0.000655957	1.27951e-05	up	4.00401	4.00401	2.00144	PCLAF	Bos taurus PCNA clamp associated factor (PCLAF), mRNA [NM_001015678]	TTTGCCACCTGATCACACAGATGATGAAAAAGAATAGAACTTTCTTATTCACCCTTGAAA///GGCAAAAAGGAATTGGAGAATTCTTCACTTCTGTCCCCTAAAGATTCAGAAAAAGAGAAT///AAAGTAATGTTAATTAAACTGAACCTATACCCTTTTTAAGAAAGGGGGCCAAAGAGGCAA
A_73_P033042,A_73_P496063|513551	0.000609441	6.64488e-06	up	4.00392	4.00392	2.00141	CENPN	Bos taurus centromere protein N (CENPN), mRNA [NM_001038099]	GGCCCATTAAGTTATTATTGCAAGAGGTAGCCTACTAGGTGATTCAGTTATACAAAATAA///AAAGCCAAACCAGTACAAACCTGCTTACGTGGTATACTATTCCCAAACTCCATATGCCTT
A_73_P072501|534849	0.000977064	4.92325e-05	up	3.99849	3.99849	1.99946	ASPM	Bos taurus asp (abnormal spindle) homolog, microcephaly associated (Drosophila) (ASPM), mRNA [NM_001206506]	TGTAAGAACCACAATGGTTTCAAGACTCAAACCAGACTGGGTTTTGAGAAGAGATAATGT
A_73_P065771|515301	0.00196129	0.000209048	up	3.99645	3.99645	1.99872	CDC6	Bos taurus cell division cycle 6 (CDC6), mRNA [NM_001192407]	CGATGGAGTCTTCATTTTAGTACTTTATACACTCAGGTCTGAAAGCAAGTGACCTTTTTT
A_73_108505,A_73_114894|506962	0.000509628	1.33971e-06	up	3.98974	3.98974	1.9963	UBE2C	Bos taurus ubiquitin conjugating enzyme E2 C (UBE2C), mRNA [NM_001037449]///LB03017.CR_A20 GC_BGC-30 Bos taurus cDNA clone IMAGE:8138398, mRNA sequence [DV929568]	TGCCGAGCTCTGGAAAAACCCCACAGCCTTTAAGAAGTACCTGCAAGAAACTTACTCAAA///TGGACCTTGGGGAGATTTTAAGTAGAAGACAAAGCTTTGTGCAAATGACTTGCTCTCTCA
A_73_P057821,A_73_P169132|781334	0.000738098	2.24052e-05	up	3.97576	3.97576	1.99123	TMSB4	Bos taurus thymosin beta 4, X-linked (TMSB4), mRNA [NM_001113231]///Hw_Fat_57_050812_F09 Bos taurus CF-24-HW fat cDNA library Bos taurus cDNA, mRNA sequence [DV779394]	AAGAGAAAAATCCACTGCCTTCGAAAGAAACGATTGAACAGGAGAAGCAAGCAGGCGAGT///TTTCCCCAAAACCCCCCACATTTTTCGTTGGAAACAGTTGTCCCAAAAATAAAATTGTTT
A_73_108757|510012	0.000775749	2.6128e-05	up	3.97542	3.97542	1.99111	STIL	Bos taurus SCL/TAL1 interrupting locus (STIL), mRNA [NM_001206662]	GCACTCTTGTGGGTTGATGTTAATGTAACATTTCAACATGTAGCACTAGCTGTCACAGAA
A_73_113651	0.000609441	6.24235e-06	up	3.97135	3.97135	1.98963			TGCTGTAATTCTGTCCTGATCATCCTCCTCTTTGGGTTCCCGTTTCCTTTTATATGCGTA
A_73_120504	0.000700634	1.89895e-05	up	3.96244	3.96244	1.98639		179533 MARC 4BOV Bos taurus cDNA 5', mRNA sequence [BE681761]	CCCGGCTCCAGAACACTACTGTAACTACCTACCCAATAAAGCCCAAGGGCACGTGCTGGT
A_73_P387626,A_73_114599,A_73_P285741|515376	0.000698085	1.75502e-05	up	3.95773	3.95773	1.98467	CDC20	Bos taurus cell division cycle 20 (CDC20), mRNA [NM_001082436]	AACAGTGAGACGCCCACCAAGAAGGAACATCAGAAAGCATGGGCTTTGAATCTGAACGGT///TACAGTGGCATCCGCAGCAGCAGATGAGACCCTGCGACTGTGGCGCTGCTTTGAGCTGGA///ATCAGAAAGCATGGGCTTTGAATCTGAACGGTTTTGACATGGAGGAAGCCAAGATCCTTC
A_73_P440391,A_73_P322206,A_73_109610,A_73_P475228|504477	0.000510569	2.40944e-06	up	3.93361	3.93361	1.97585	NCAPH	Bos taurus non-SMC condensin I complex subunit H (NCAPH), mRNA [NM_001034213]	CATACTTTATTCTTGTAGAAAAGAATTCCCCAGTAGGACTTGTCCTTTAATAGCTACCAA///TTCTTAAACAGAAAGATGCCGAACCGACCAACTTTAAAGTAGCTGCCGGCACTTTGGATG///AATTGAAATTCAGTATGCCAAGACTGCCAAAAAGATGGACATGAAGAAGCTGAAGCAGAG///TCCCCAGTAGGACTTGTCCTTTAATAGCTACCAAAACCTTGTATATAAAGCATATATACA
A_73_P441411,A_73_P060071,A_73_P391586,A_73_P142536|508467	0.000852578	3.34392e-05	up	3.93044	3.93044	1.97469	KIF11	Bos taurus kinesin family member 11 (KIF11), mRNA [NM_001192185]	GAGTGTACATTTCTGAAGAAAATTTTAGAGCTATGAGTGGAAAACTAACTGTTCAAGAGG///CCAGAACTTGAGCCTTGTGTGTAGATTAAAAATGAGTAGAAAATATCAAGGCAATACTGT///AAGATCAGAAGAAGGAAATGGATGGCTTTCTTAGTACATTGTGTAACAATCTACATGAAC///GCCAGAGTTTTATCTAGAAATCTTTGACACTTTTCTGTGGTTATCTCTAAAATCACTGTC
A_73_102967,A_73_P485463|616028	0.000666125	1.43912e-05	up	3.91185	3.91185	1.96785	NUSAP1	Bos taurus nucleolar and spindle associated protein 1 (NUSAP1), mRNA [NM_001046571]	TGTTGTACCTGAGTGGAGTGTCTGTGTTTTGTACGGCTTGAGATTTTCATGAATAAAATT///ATAAAAAACCAGTGTTTGATCTCAAAGCAAGTTTGTCTCGTCCTCTCAACTATGAGCCAC
A_73_117497,A_73_P257126|515287	0.000888726	3.83211e-05	up	3.88514	3.88514	1.95797	CDCA2	Bos taurus cell division cycle associated 2 (CDCA2), mRNA [NM_001046194]	TTCTGTACCTCTACACTTGCCAATCCTAAAAGTACCACCCAGTCAAGAGGCTGCAAAAGA///CCTTCAGAGAACAAAGAGCGAAACCAAAGTAAGACGCAGCTTGAGGCTGCAGAAAAGTTT
A_73_P038541,A_73_P127621|615827	0.00123983	8.19462e-05	up	3.88435	3.88435	1.95767	CKS1B	Bos taurus CDC28 protein kinase regulatory subunit 1B (CKS1B), mRNA [NM_001113311]///C0009286O11.Q1KM13R KN510 Bos taurus rectum from E. coli unchallenged animals Bos taurus cDNA clone C0009286O11 3', mRNA sequence [FE008243]	CTGTCCTCACTTGCTAACATCTTCCTGATGACATTATTGTGTTGCCTTCTTGTTTCTCAC///GTATTTGTCCGAATAGTAAATTTGTTTGTGCGACATGATCACTCTGCCTGAGGACCTTCA
A_73_P064616|100295656	0.00071998	2.07996e-05	up	3.87783	3.87783	1.95525	C19H17orf67	chromosome 17 open reading frame 67 [Source:HGNC Symbol;Acc:HGNC:27900] [ENSBTAT00000049635]	GGGTTTTGGTCATTGCTTTTTTGTCCTCTCTCGTTTTCTGCTCTAATAAATACTGGTGTT
A_73_P253106,A_73_111942|510538	0.00130048	9.19631e-05	up	3.87179	3.87179	1.953	ASF1B	Bos taurus anti-silencing function 1B histone chaperone (ASF1B), mRNA [NM_001075453]	AATTCTTTCTGTCTTGTGTCCTTTCTCTCTTCTACACATACTATATACTCCACCTGCGGG///ATTGCAGTTTGTGTATTAAAGGGTTTTTATATTAAATATTTGGTTGGTCTGAAAATAAAA
A_73_115355	0.0012282	8.0286e-05	up	3.86675	3.86675	1.95112		Rep: Protein CASC5 - Homo sapiens (Human), partial (6%) [TC405059]	TTATTAAGAGAAAGCAGTAGCACTCAGCTATTGGAGTGGTTGCCATCTTCTCTTAAACAC
A_73_107424|513523	0.000878626	3.71149e-05	up	3.86035	3.86035	1.94873	ORC1	Bos taurus origin recognition complex subunit 1 (ORC1), mRNA [NM_001014918]	TCATATATCACTGCCATCAAAAATTCCTCGTTTCTGGAACAGAGCTTCCTGAGAGCCATC
A_73_116652|538238	0.000721264	2.09551e-05	up	3.85751	3.85751	1.94767	PLK1	Bos taurus polo like kinase 1 (PLK1), mRNA [NM_001038173]	ACGTGGCTGTTGAATTCGGGACTGTGCTTGCCTTTATACACATTAAACATACGTGAATCT
A_73_115001|505991	0.0068884	0.00158788	up	3.84915	3.84915	1.94454	CHAC1	Bos taurus ChaC glutathione specific gamma-glutamylcyclotransferase 1 (CHAC1), mRNA [NM_001098882]	CGCCATCGTGGACGCTGTAGGCACTATGCTGCCCTGCTTCTGTCCCACTGAGCAGGCTTT
A_73_P043156|768315	0.00390925	0.000676784	up	3.84616	3.84616	1.94342	C2CD3	Bos taurus C2 calcium-dependent domain containing 3 (C2CD3), mRNA [NM_001078130]	CAACAGCATGACATGAATTTGTTGCCATCCTCACAAGTAAAATTTCCAAAGTAGAATATC
A_73_P037131,A_73_P417811,A_73_108199|287016	0.00054871	4.62741e-06	up	3.83316	3.83316	1.93853	H2AFZ	Bos taurus H2A histone family, member Z (H2AFZ), mRNA [NM_174809]	TTGGTTTTGTACAGACATTATTTCCACTCTGGTGGATAAGCTCAATAAAGGTCATATCCC///AGCAGAAGTTATAGTAACAAACATTTGGTTTTGTACAGACATTATTTCCACTCTGGTGGA///TCTTCCCTTTAAATTACTGTTAATTCTGTCTGTAGATCACAAAGTTAAAAGGCCCAAGTG
A_73_P167012	0.00151532	0.000124451	up	3.83193	3.83193	1.93807		Rep: Major facilitator superfamily MFS_1 - Stenotrophomonas maltophilia R551-3, partial (5%) [TC403445]	CTAGGAGCAACTCAAGTTTCTTGTTAGTCTGCACATGTGGGTGTCTGTAGTGACCACAAA
A_73_P211697,A_73_P104631|618541	0.00643092	0.00143543	up	3.81758	3.81758	1.93266	LOC618541	Rep: Uncharacterized protein YMR317W - Saccharomyces cerevisiae (Baker's yeast), partial (3%) [TC460016]	ACCTCATCCAGGTATAGGAGCCCCAGTGATTCTGGAGGAACTCCACCTCATCCAGAAGGC///CAGCTGATAGAAGTAGTACGGTATTCTGTGTTTAACATTAAATTTCTTCCCCGTTTCAAA
A_73_119360|615553	0.000966475	4.78608e-05	up	3.81064	3.81064	1.93003	RMI2	Bos taurus RecQ mediated genome instability 2 (RMI2), mRNA [NM_001099720]	GGGTCAGGTCTTGTTCCCCATTGCTGTAAACTTTTGCTGGAGTTGATTTCTACCACCAAT
A_73_P043591|507185	0.000726174	2.13906e-05	up	3.80728	3.80728	1.92876	SLC51B	Bos taurus solute carrier family 51 beta subunit (SLC51B), mRNA [NM_001077867]	GGAGTGTTCGCAGACAGAGTGAGTGAACTGCAATCAAACTAAAACCCTGTTTTGAAAAAA
A_73_117178,A_73_P038706|514559	0.0186413	0.00615479	up	3.80242	3.80242	1.92692	TTL	Bos taurus tubulin tyrosine ligase (TTL), mRNA [NM_001113233]	CTTACTTTACGCTCTCATTCTTTGAAAAGATCTGAATTATATCCTAAGGCAGCGCTCTGA///AGTAGTATCTTACTACAAATCAAACATATAATCAGGAGCTGCCTCATGAGCGTGGAGCCC
A_73_P038461,A_73_P282791|512743	0.000512795	2.75852e-06	up	3.80226	3.80226	1.92686	LY6G6E	Bos taurus lymphocyte antigen 6 complex, locus G6E (LY6G6E), mRNA [NM_001081520]	CCTGCTAGGAAAGATTAATTTGGTAAATCAAGAAGGAAGGTTTGGGGAACTATGAAGAGT///TTGGTCTTTTCTAGATGCTTGTTTCTGATGCATTCTGTAATCCCCAGCTCTCTGGCAAGG
A_73_112864|514618	0.000765889	2.53897e-05	up	3.79846	3.79846	1.92541	RACGAP1	Rac GTPase activating protein 1 [Source:HGNC Symbol;Acc:HGNC:9804] [ENSBTAT00000016988]	TAGGACGACAAGGCAACTTTTTTGCTTCTCCAATGCTCAAGTGAAGTCGTGTCTCCTGTT
A_73_P064691	0.0293134	0.0110613	up	3.79575	3.79575	1.92439		BRCA1 interacting protein C-terminal helicase 1 [Source:HGNC Symbol;Acc:HGNC:20473] [ENSBTAT00000061499]	GACACAAAGTTGAAAAGACTCATGCCTATTAAAGAAAGTAAAGTTGATGACCTTGGTAGT
A_73_P368986,A_73_P384926,A_73_113109,A_73_P362991|505791	0.000699123	1.77958e-05	up	3.78849	3.78849	1.92162	TROAP	Bos taurus trophinin associated protein (TROAP), mRNA [NM_001024477]	TTTGATCCCTGATCCTTTTTTCTCCTTTTTAGTTGTAGTCGTCATGACCACCCTCCAAGC///TAAAAGAAACCCGAGATAAAACCCACACCAGGGACGGCTGTGACTCCTGCCTGATGCCCT///CCCTGTCCTGTCTTGCTCCTTCCTTTTAACCTTATTTATTTTCCACACCGTGGATTGGAA///TAGAACTCTGAATGCCCCTGAAAAAATACCGGGGGCTTTTCACCTTTCTGGACTGTTACA
A_73_105181,A_73_P316381|505886	0.0258903	0.00945611	up	3.78361	3.78361	1.91976	IQGAP3	Bos taurus IQ motif containing GTPase activating protein 3 (IQGAP3), mRNA [NM_001098880]	CATGTGGCTTATAAGCCACAGAATCCCATGATTTTCTAGCCTGATGGGAAGGACTGAACT///AAGAATGTTAACTCCATTGTGAAGATCCAGGCATTTTTCCGAGCCAGAAAAGCCCGGGAT
A_73_104010,A_73_P381316|517007	0.000961174	4.72247e-05	up	3.75605	3.75605	1.90922	CHTF18	Bos taurus chromosome transmission fidelity factor 18 (CHTF18), mRNA [NM_001192460]	TACCTAGGTGTTGCTTTCTCTCTCCTAGAAAGTGTACAAAAGCACCAGCGTTCTCGCAAA///GAGATGGAAGAGATGACACCTCCTGATTCCCCGACTCTGGACATCACTCCCCCACCAAGT
A_73_P056456|527837	0.00243675	0.000312088	up	3.7559	3.7559	1.90916	CDCA4	cell division cycle associated 4 [Source:HGNC Symbol;Acc:HGNC:14625] [ENSBTAT00000044237]	TCAGGTGTTTGATACGCTGGAGAGCCACAGCCCGGGCACGGTGGAGGAGCTGTTTTCCGA
A_73_117182	0.000748197	2.39909e-05	up	3.75551	3.75551	1.90901		Rep: AD036 - Homo sapiens (Human), partial (12%) [TC431837]	TCTGTCCGTGCCTTATGAAAGTGTCTGTGCACTTTTAACCCTCTTTAAGAGCAACTTTAA
A_73_106743|508105	0.0268272	0.00988202	up	3.75473	3.75473	1.90871	TNFAIP3	Bos taurus TNF alpha induced protein 3 (TNFAIP3), mRNA [NM_001192170]	AATGCCAAGTGCAATGGCTACTGCAATGAGTGCTTTCAGTTCAAGCAGATGTACGGCTAA
A_73_113797,A_73_P482568,A_73_P341251|516326	0.00186934	0.000190739	up	3.74737	3.74737	1.90588	LMNB2	Bos taurus lamin B2 (LMNB2), mRNA [NM_001276353]	CTTTCTTTACCCAGAGCCACTGAAAACTATTTTTATATCATTGGCTTCTTTAATCCTTCC///TTCCGGAAGATGCTGGACGCCAAAGAACGAGAAATGATGGAAGTGCGGGACATGATGCAG///AGGTGACCACGCGCGAGGTGAGTGGCATCAAGACATTGTACGAGGCAGAGCTGGCTGACG
A_73_P119681,A_73_119893|508861	0.000609441	7.74632e-06	up	3.74711	3.74711	1.90578	SAT1	Hw_liver_30_050721_F07 Bos taurus CF-24-HW liver cDNA library Bos taurus cDNA, mRNA sequence [DV784703]///Bos taurus spermidine/spermine N1-acetyltransferase 1 (SAT1), mRNA [NM_001034333]	TTATAAGTGGGGGGAAACAAGGGGACACCACCCCGCGGGATAATTTTTAAAGAGTTTTTT///CTTCATTCTTGTGAGTCATTTAAATGTGTACAATGTACACACTGGTACTTAGAGTTTCTG
A_73_P385176	0.0156024	0.00487678	up	3.7453	3.7453	1.90508		Rep: Isoform 3 of Q8IVF7 - Homo sapiens (Human), complete [TC398467]	GTGTTCTGTCATGTTTGACTTTGAGGCTCTGGAGAGTGGTGACGATGGTGCGTTTGACAA
A_73_P105746,A_73_P051261,A_73_P264716,A_73_P476998|537027	0.000798917	2.82709e-05	up	3.73929	3.73929	1.90276	BUB1B	Bos taurus BUB1 mitotic checkpoint serine/threonine kinase B (BUB1B), mRNA [NM_001145173]	GAAGTTGTGGGATCTTCTGTACCACAGCGAAGCACACTGGCTGAACTAAAAAGCAAAAAA///TCACCTGAACAAAGCTTTTTGGAAAGTGGGGAAGTTAATCAGTCCTGGGGCTTTCCTCTT///GGTTTTCCGGAAGAAATTAAAAGAGCGAAGAGAAGCTGAGCTACTGACCAGTGCAGAGAA///TTTTTAACCTCAGTGGCTTTCCGACTGTACAAACCCTGGAAGGACAAAAGATCCTGGCTA
A_73_102040,A_73_P100681|513497	0.0006265	8.573e-06	up	3.73514	3.73514	1.90116	CDKN1A	Bos taurus cyclin dependent kinase inhibitor 1A (CDKN1A), mRNA [NM_001098958]	TTCAAAGCCCCACCCACAGTGCTGAGTATACAGCAGGTGCTCAATAAATATTCCTGATGA///TGCACCCTCGTGACTCGCTCCCCCGAGCGGCCCGAGGGGACCCCCGGTGGGCCTGGCGCC
A_73_P502353	0.0250028	0.00903207	up	3.7324	3.7324	1.9001		PREDICTED: Bos taurus testis specific protein, Y-linked 3-like (LOC786811), partial mRNA [XM_001254382]	ATTGTCAAGGAGTACCTGATGAAGGTCACTGGATACCACGCATCTCATTTCACTCCAGTT
A_73_P489870|786089	0.0162508	0.00514254	up	3.70346	3.70346	1.88887	LOC786089	PREDICTED: Bos taurus N-acetyltransferase ESCO2 (LOC786089), transcript variant X2, mRNA [XM_015463324]	CACCAGATGGCAAGTTATTTGCAACCAACTACACACCTAATTTCCTTGTATACAATTTTA
A_73_P422206,A_73_P047316,A_73_P376781|100140639	0.00112558	6.72037e-05	up	3.69169	3.69169	1.88428	RAD54L	Bos taurus RAD54 like (S. cerevisiae) (RAD54L), mRNA [NM_001130766]	AAGGTACTTATATGTTCGCTTAGATGGCACGATGTCCATTAAGAAGCGAGCCAAGGTTGT///TTTTCTCTTGGCGAATTGAAGGAGCTGTTTACCTTGGATGAGGCTAAGCTCAGTGACACA///TCTATGACAAGTGTGTGGAAGAGGAAGATGGCTTTGAAGGTACCTTGGACATATTTCCCC
A_73_101999,A_73_P292076|280741	0.00071998	2.07632e-05	up	3.68799	3.68799	1.88283	CA4	Bos taurus carbonic anhydrase 4 (CA4), mRNA [NM_173897]	TTGACCTCTGGTCTCAGCCCTTAAGAGGGCTTGGCCTCTGTCCCTCAGGCTTCTCAGATT///CTGTTCTATGACGACCAGCAGAAAGTGAATATGACGGACAACGTCAGGCCCGTGCAGAGC
A_73_109270|414925	0.000700634	1.89659e-05	up	3.67051	3.67051	1.87598	BIRC5	Bos taurus baculoviral IAP repeat containing 5 (BIRC5), mRNA [NM_001001855]	CATTATCTCACATTGATGTCTGCAGATCCTGTGACCATCTCTTTTACCCCATCAGATCTG
A_73_P092956|540863	0.00170118	0.000156576	up	3.67009	3.67009	1.87582	CCDC18	coiled-coil domain containing 18 [Source:HGNC Symbol;Acc:HGNC:30370] [ENSBTAT00000026887]	GACTTCAGTACTCTGAGTGGAATGCTAAGATACATAAACAAAGAAGTGCGACTATTAAAA
A_73_P030501,A_73_P331986|780881	0.000627527	8.76474e-06	up	3.66144	3.66144	1.87241	ARHGEF39	Bos taurus Rho guanine nucleotide exchange factor 39 (ARHGEF39), mRNA [NM_001079800]	ATGTCCTTTGACCAGCTCTTAAAGAATCAGGACATCAAGTCCGACTCAGCTGAATCAGCT///ATAAGTGAGACTGCCCAGAGAGTCCACACCATTGGTCAGAAACAGAAGAATGAACAGCAT
A_73_106343	0.000652018	1.06949e-05	up	3.65791	3.65791	1.87102		Rep: Vav-like protein C9orf100 homolog - Bos taurus (Bovine), complete [TC396290]	TTTGTCTCAGCTATGCAATATGAGAAAAGGGATTTTTGTGCCCTTAAGGCTGGCATGACT
A_73_P282306,A_73_100761|520842	0.000609441	6.5626e-06	up	3.65467	3.65467	1.86974	KLF4	Bos taurus Kruppel like factor 4 (KLF4), mRNA [NM_001105385]	AGGAAACCAAAAGACAAACTCAAGGAAAAAACAAACAGATGGGGTCTGTGACTGGATCTT///TTATGCACTGTGGTTTCAGATGTGCAATAATTTGTACAATGGTTTATTCCCAAGTATGCC
A_73_P373386,A_73_P047436,A_73_P210261|780876	0.000667089	1.50092e-05	up	3.62975	3.62975	1.85987	LOC780876	Bos taurus MAD2 mitotic arrest deficient-like 1 (yeast)-like (LOC780876), mRNA [NM_001079796]	GAGGGTTGACATAAGTTACTGCACAGATTGCATCAGTACTGCAGTGTTACTTCCTTTGGA///GAGTCTATAAAGCTGTGGATATTCCCACTTTTCAAATTGTTGTGATACAGAACTCTTAAG///CCTGAGCTCATAAAATACCTAAATAATGTGGATCAACTAAAAGTGCACCCAGAGAAAAGT
A_73_P109101,A_73_117851|281605	0.00383104	0.000653849	up	3.62814	3.62814	1.85923	ADRB2	Bos taurus adrenoceptor beta 2 (ADRB2), mRNA [NM_174231]	AATATACATCCTTCTAAACTGGTTGGGCTACATCAACTCCGCTTTCAATCCCCTTATCTA///TTGTAGGCAGGGACTTGAGGGGCAGCTTTGGTTGTTTTCCTGAGCAAAGTCTAAAGTTTA
A_73_P090491,A_73_105437|520448	0.00698747	0.00161937	up	3.61216	3.61216	1.85286	KCNMB4	Bos taurus potassium calcium-activated channel subfamily M regulatory beta subunit 4 (KCNMB4), mRNA [NM_001192523]	GTATGGAGTATCTGTTTCAGAAATCCTATAGAAGTTAATTTTCTTCGGGGAAGTAACAGT///CAGGGAATTGATAAAAACAGTGCGTGAACATACGTGTTGGTAAGGGAAGTTGATATATAT
A_73_P034106|528920	0.0201242	0.00680177	up	3.60807	3.60807	1.85123	EVI2A	Bos taurus ecotropic viral integration site 2A (EVI2A), mRNA [NM_001034568]	GTTATGCCAGATGCTTTCATCTTTACATGTGGTGTACATAAGAAAGTCGTTTTCTACTAT
A_73_P421496,A_73_110414|618849	0.0006265	8.18717e-06	up	3.60771	3.60771	1.85108	HMGA1	Bos taurus high mobility group AT-hook 1 (HMGA1), mRNA [NM_001076523]	CCGGAAAACCACCACAACTCCAGGGAGAAAACCAAGGGGCAGACCCAAAAAACTGGAGAA///CATTATTTGTCCCAGCCTGGGGCTCCCCTCTGGTTTCCTATTTGCAGTTACTTGAATAAA
A_73_P034876,A_73_P407237|616317	0.000857835	3.43121e-05	up	3.59511	3.59511	1.84603	STMN1	Bos taurus stathmin 1 (STMN1), mRNA [NM_001034790]	TGTCCCGATCTTACAGACGCTACTGTACTTGAATGGTTAATAAAACTGCACAGTGCTGTT///CCCAATTCTGTCCCGATCTTACAGACGCTACTGTACTTGAATGGTTAATAAAACTGCACA
A_73_P167523,A_73_120432,A_73_P053796,A_73_P036041|526682	0.0276185	0.0102534	up	3.59488	3.59488	1.84595	CYP3A5	Bos taurus cytochrome P450, family 3, subfamily A, polypeptide 5 (CYP3A5), mRNA [NM_001075888]	TGCCAAGAAGCTCTTAAGATTTGATATCCTTGATCCATTTCTACTTTCAGTAGTACTCTT///TGGAAACGTTCTATCCTACCGAAAGGGTGTTTGTGAGTTTGATGAAGAATGTTTTAAAAA///TTTTCTGAAGGTTGTGCTCAGAGATGAGACCATAAGTGGAGCTTGACTTCCCTTAAGGAC///GGACTTGATTTACTTTGTGATAAAACTCAGAAATAAAGACGGCCTTCATCTATTGCACTT
A_73_107699|505011	0.00084294	3.21444e-05	up	3.59361	3.59361	1.84543	SPC25	Bos taurus SPC25, NDC80 kinetochore complex component (SPC25), mRNA [NM_001034230]	AGTAAGGCAGACCAACAATTTTTCAGCTTTTCTTGCCAACGTTCGGAAAGCTTTTACTGC
A_73_P278121,A_73_P087161|337870	0.000489803	1.04388e-06	up	3.58607	3.58607	1.8424	MAD2L1	Bos taurus MAD2 mitotic arrest deficient-like 1 (yeast) (MAD2L1), mRNA [NM_001191513]	CTACTACAATTCATAAAGTAAATAGCATGGTAGCCTACAAAATTCCTGTCAATGACTGAG///GAGCCTATAAAGCTGTGGATATTCCCACTTTTCAAATTGTTGTGATATAGAACTCTTAAG
A_73_106251	0.00500773	0.000977708	up	3.58477	3.58477	1.84188		Rep: LOC788858 protein - Bos taurus (Bovine), complete [TC446482]	TCCCCTTGTATTGCTAGCACCTCTTCTAATATTAGACACACATATAGGCATTCACAACTG
A_73_P091611|513643	0.0106846	0.00294685	up	3.58309	3.58309	1.8412	FOXM1	forkhead box M1 [Source:HGNC Symbol;Acc:HGNC:3818] [ENSBTAT00000021101]	AATGACAGCCTCAGCAAAATCTTGCTGGACATCAGCTTCCCTGGCCTGGAGGAGGACCTG
A_73_114366	0.00273457	0.000379547	up	3.57741	3.57741	1.83892		Rep: Coiled-coil domain-containing protein 18 (Sarcoma antigen NY-SAR-24). - Canis familiaris, partial (83%) [TC425564]	GCTGGTTCAACTCAGGGAGAAAATTTATAGTTAAAAGAAGACGCTGATGTGATGAAAAGT
A_73_P161142	0.00126146	8.58823e-05	up	3.57577	3.57577	1.83826		Rep: Nucleosome-binding protein 1 - Homo sapiens (Human), partial (18%) [TC418218]	TCTCCAGAAGTTTTTCATCTTGCAAATGTGAATCTATACCCAAGAGCAATTTCTTTCCAT
A_73_113068,A_73_P447341,A_73_P327701|511654	0.00141628	0.000110064	up	3.57061	3.57061	1.83617	CHAF1B	Bos taurus chromatin assembly factor 1 subunit B (CHAF1B), mRNA [NM_001098014]	AGAGATATGTCACCTCTTGTATTTAGGATACTTTTTCCCTCGGAGATGTGAACATCTTAA///AGGAGACAGTACTTTGAGGTTTATTCCATTGGGTTTTAGTGTGTTGGATTATTTGATCAA///AATGTGACAAACACGACTTACGTTTTCTCCAGGAAAAATCTTAAAAGGCCCATCGCCCAC
A_73_P041516,A_73_P095106,A_73_P348536|520192	0.000742422	2.33384e-05	up	3.55338	3.55338	1.82919	EPHA4	Bos taurus EPH receptor A4 (EPHA4), mRNA [NM_001083441]///ephrin type-A receptor 4 precursor [Source:RefSeq peptide;Acc:NP_001076910] [ENSBTAT00000013238]	AACTGTTTCCCAAAATCCAGGTTGGCTGCAGTCTTATAAATATCTATAGAATCCTAACAA///TATAAGGATAACTTCACTGCTGCTGGTTATACCACGCTAGAGGCTGTAGTGCACATGAAC///TGGAAGTTCGAGGCTCCTGTGTCAACAACTCTGAAGAGAAGGATGTGCCAAAAATGTACT
A_73_P037501,A_73_P208327|282151	0.0227575	0.00798485	up	3.55262	3.55262	1.82888	BCL2A1	Bos taurus BCL2 related protein A1 (BCL2A1), mRNA [NM_001037100]	CTACACAGAGAACTTTGATGATGTAACTTAACATTCTGAAGTTATGGGAATTTTCTCCCC///CATTGTTAACTGGGGCAGGATTGTAACCATATTCGCCTTTGAAGGTATTCTTACCAAGAA
A_73_P110736,A_73_P082126|493716	0.0138184	0.00415457	up	3.54829	3.54829	1.82712	IL18RAP	interleukin 18 receptor accessory protein [Source:HGNC Symbol;Acc:HGNC:5989] [ENSBTAT00000047919]	TTGTCAGCGTTATTAAGAAAAGCAGGAGGGGAATCTTCATCTTGAGCCCCAACTACGTCA///AGCATTATTAAGAAAAGCAGGAGGGGAATCTTCATCTTGAGCCCCAACTACGTCAGTGGA
A_73_P067596|615288	0.0113601	0.0032088	up	3.54283	3.54283	1.8249	SELENOV	Bos taurus selenoprotein V (SELENOV), mRNA [NM_001163244]	AAGCTACAGACAATTGTCAACCTGCTCAATGAGGAGTTCAAGAAAAAGGTAGCAGGCAAC
A_73_110835|510244	0.00161498	0.000142899	up	3.53495	3.53495	1.82169	CDKN2D	Bos taurus cyclin dependent kinase inhibitor 2D (CDKN2D), mRNA [NM_001046050]	TATGGAAAATATTGTTGTGTGTGTAATTTAATGTTTTTACCCATTAAATTAAGACTTGTG
A_73_P041896,A_73_108911|617851	0.0262381	0.00961112	up	3.5348	3.5348	1.82163	PADI2	Bos taurus peptidyl arginine deiminase 2 (PADI2), mRNA [NM_001105452]///peptidyl arginine deiminase 2 [Source:HGNC Symbol;Acc:HGNC:18341] [ENSBTAT00000004411]	GGTTTGTATGTTGTTGCTGTGGCCAGTAAATGTTTAACCCAATAAATCTGAAATTTTAGC///TTCTTCCCAAACATGGTGAACATGATCGTACTCGACAAGGACCTGGGGATCCCCAAGCCG
A_73_P349691,A_73_P503348,A_73_108541|513155	0.000609441	7.42451e-06	up	3.53448	3.53448	1.8215	MMD	Bos taurus monocyte to macrophage differentiation associated (MMD), mRNA [NM_001075601]	GTGATTGAGCTCTTTTTCTATCTCACAATGGGCTTTTCTCCTGCCTTGGTGGTAACATCA///TCTGGTGCCCAGTGGTTTAGTTATTGTCACTTAGCTTTATATTATCGGTTTGATAGTCAT///AAGTATATTAACTTTTGTGGATTCATTTGAAATCTGCGCAAAAGTACCACTGGCAAAACC
A_73_P265541,A_73_119397,A_73_P285376|509161	0.000509628	1.87356e-06	up	3.53204	3.53204	1.8205	DLGAP5	Bos taurus DLG associated protein 5 (DLGAP5), mRNA [NM_001076822]	GGAAGAAATTTCAGATATTGTGGAAGGAATGGAACTAAATTCAGTTACAACACAGGATGT///GATGCAGAACCTGTGGATACTGAGGGCCTGCTGTTAAGAGATGTAAGCATCCTTGAATTT///GAAGGAATGGAACTAAATTCAGTTACAACACAGGATGTTTTGATGATTAGCCCTGAAAAA
A_73_115109|507948	0.00124954	8.30953e-05	up	3.53188	3.53188	1.82044	PTCH2	patched 2 [Source:HGNC Symbol;Acc:HGNC:9586] [ENSBTAT00000033308]	CCCCGCCAATCTCTCACCACATAAATTATTTATATGGAGATGTTTATTTTTGTAGTTTGG
A_73_P090136,A_73_P090141|506740	0.000750779	2.42532e-05	up	3.5289	3.5289	1.81922	ESPL1	Bos taurus extra spindle pole bodies like 1, separase (ESPL1), mRNA [NM_001045949]	CCTCCAAACTTAGGTTTGGCCCTGAAGATAAATATTTTAAGTAATTTTCCGGTGTTTTAC///CTCAAATACCTTATTGGGGCTGCACCTGTAGCCTATGGCTTGCCTGTCTCCCTGCGGTGA
A_73_P489323,A_73_P105371|783509	0.0267949	0.00986811	up	3.52201	3.52201	1.8164	LOC783509	Rep: Sodium- and chloride-dependent creatine transporter 1 - Rattus norvegicus (Rat), partial (3%) [TC414461]	TCCATCGTCTTCTGTCTGGAGCAGCTTTCCCTGGTGATTCGGTCCTTGCAGCACTTTGGG///GTCTACATAGTTGTTTGGTGATTGTTAACTGCGGAAAATAAAACTGAGCTTTTGTGCAAA
A_73_P434721,A_73_P091391,A_73_P282516|509972	0.00241666	0.000307126	up	3.52041	3.52041	1.81574	LOC509972	1384444 MARC 7BOV Bos taurus cDNA 5', mRNA sequence [DN538715]///Hw_loin_51_050810_D10 Bos taurus CF-24-HW loin cDNA library Bos taurus cDNA, mRNA sequence [DV793724]	AGAGACAGACTTACTCATTCTGTATGTCAGCTGCCCAAAAGGATGGATTGGATTTGGGAA///CTTCAAGGCGTTTTTAGGGAATTTCACACACCATCCCTAAGAGATGCATTAAAAATTGTT///AGAAGATACAAAGGCATTTTTGACCATTGGATTGGCCTTAGCAGAGAATCATCACATCAT
A_73_105243,A_73_P037486|538515	0.000655957	1.33308e-05	up	3.51197	3.51197	1.81228	FAM107A	Bos taurus family with sequence similarity 107 member A (FAM107A), mRNA [NM_001083488]	AACCAGCTGGAGAAACCACCAGAAAAGGAAGAGGACCACGCCCCTGAATTCATTAAAGTC///GTTTTTACATGTCTGTCCGGCAAGAGTCATGCTAAAAATGCACAACCCCTGAGTAAAGAC
A_73_113268,A_73_P285541|444863	0.00800854	0.0019683	up	3.49543	3.49543	1.80547	GYPC	Bos taurus glycophorin C (Gerbich blood group) (GYPC), mRNA [NM_001002886]	AACAGCAGGTGCCAGAGCTCCAAGGCACCTTTGTCTCCCGTAGATGCAGCTCTGATTGGA///ACAACGGTGGCAACAGCAAAAAGGAGTACTTTATCTGAAGGACTTTACCAGGACTCAGCT
A_73_P206072	0.000609441	7.61591e-06	up	3.48738	3.48738	1.80214		Rep: Peptidase S1 and S6, chymotrypsin/Hap precursor - Methylobacterium sp. 4-46, partial (7%) [TC412565]	AGAGGCAGATTTGCATATCAGGTATATCCAAAAGAGATACTAGCGTTGTGTTAAAAAGTT
A_73_P064811,A_73_P314276,A_73_103110,A_73_P383426|513059	0.0036943	0.000618677	up	3.4855	3.4855	1.80137	ATAD5	Bos taurus ATPase family, AAA domain containing 5 (ATAD5), mRNA [NM_001206489]	GGAATTCATCTTAACATTTCAAAAGAGACTATGAACACTTTGGCAGCTGACTTCCCTTAA///TGAAGAAGTAAGAAATCTTTTGTTGGAGGAAATTAGGTGGTCAAATCCCAGATTTCCTTT///GCTGACTTCCCTTAATATTCTACATTAACGATGCCTTCTACGGAGTCTCATGTGGCTCTC///AGGATACAGTCAGAAGTGGTTCTGTGAGTGACCCTGAAACCTATGAAATTTCCCAGCAGA
A_73_P165962	0.000924144	4.21937e-05	up	3.48108	3.48108	1.79953		Rep: Sacsin - Homo sapiens (Human), partial (98%) [TC398123]	GTAGGTTATAAAAGAGGAATTATCAGCTTGTGTCTTCCCCATGAATAATTCAGAACTGAT
A_73_P079931,A_73_P148301|534330	0.000512795	2.95843e-06	up	3.47256	3.47256	1.796	PIF1	Bos taurus PIF1 5'-to-3' DNA helicase (PIF1), mRNA [NM_001206052]	TGCAGGAACTACCAGGCGAAGTACACAGCTTTGAGGCCATGGACAGTGACCCTGAGCAAG///CTGCTCTTTTGGGAAGGGCATTGTTTGTGGGAGTATGGATATTCTCAGACTGTATTTATT
A_73_118250	0.000629314	8.97119e-06	up	3.46709	3.46709	1.79373		centromere protein E [Source:HGNC Symbol;Acc:HGNC:1856] [ENSBTAT00000011898]	GAATGGGATGCATTCCCATAATCTAGAATGGTGATAGCAATATACCTTCTTCTTAAACGT
A_73_P042091,A_73_P154382|613895	0.000699123	1.79984e-05	up	3.46205	3.46205	1.79163	TEX30	Bos taurus testis expressed 30 (TEX30), mRNA [NM_001076295]///Hw_Fat_47_050805_F08 Bos taurus CF-24-HW fat cDNA library Bos taurus cDNA, mRNA sequence [DV779494]	TGTCTCTTGAGAGTACTGTCATAGTTGTATAAAGATGATGTACAAATATTGAAGGTGGTC///TAATAGGGGTTTTTCTTTATAATAAAAAGAAAAGGTCCCTCCCCTGGTGGGAAGAAAAAA
A_73_P037081|613376	0.000700634	1.90728e-05	up	3.46036	3.46036	1.79092	RPIA	Bos taurus ribose 5-phosphate isomerase A (RPIA), mRNA [NM_001035433]	CTTGGCAGGGTGAGGGTTAAATCCAGTCTTCTGAAGTATTGTTATTAAATGTCTTTTTAA
A_73_P249091	0.0201622	0.00681644	up	3.45645	3.45645	1.78929		Rep: LOC518291 protein - Bos taurus (Bovine), partial (56%) [TC406419]	GCCCTGATGATCTTATCAGAAATTGATTGTATTTGTGTCAGTCCATTTCTAGAGTATTCT
A_73_107533,A_73_P216612|538436	0.00104479	5.81321e-05	up	3.45333	3.45333	1.78799	CCNE2	Bos taurus cyclin E2 (CCNE2), mRNA [NM_001015665]	ACACTTGACCTAAACTTCTATTTTCTTAAGGCAGAAAAGCAGTAAATGTATACTGACTCC///AACAGCAGTACTTGTTTACAAAGATGACTTCATTCCCAATACTGGCTGGATAAAAGCCAG
A_73_P128991	0.0288417	0.0108468	up	3.44986	3.44986	1.78654			CAATGTCCATATTCAAGTACCTCCGTTACTTCACACGTACTATCCTGGATGCTAGATCCG
A_73_P091746|618398	0.00313331	0.000472828	up	3.44501	3.44501	1.78451	DMC1	Bos taurus DMC1 dosage suppressor of mck1 homolog, meiosis-specific homologous recombination (yeast) (DMC1), mRNA [NM_001191338]	ACTTCCAGGAGCCGGCGGCTACTCAGGAGGAAAGATTATTTTCATCGATACAGAAAATAC
A_73_P154447,A_73_117932|767924	0.000592948	5.6291e-06	up	3.44444	3.44444	1.78427	SMIM3	Bos taurus small integral membrane protein 3 (SMIM3), mRNA [NM_001244119]	TTGATCAGCTTTGAAGAACCATAGGCCCTTATTACTGATGAGAGCCTTCAAGGTGGTGAG///AAACCAGGAGCATCTGGAGATTGGTTAAATTATGTAAGAAGATAGCACAGGTTATCAGGA
A_73_P466483,A_73_P470418,A_73_P097241,A_73_104712|614056	0.000714636	2.03708e-05	up	3.44158	3.44158	1.78307	SGO1	Bos taurus shugoshin 1 (SGO1), mRNA [NM_001081617]	AAAGTCCAAACTGAAAGAAGCCCACGATGTCATGTTAAAGCTGCGGAGAGAGTGTTACCT///TCGCCTCATTTTAGCCTGAAGGATATCACTAATGTCCCTTTGTATCCTGTGATGAAAGCC///GATTTGTGTTTCTTGAATTCGCCTATTTTCAAGCAGAAAAAAGATTCCAGACACTGTTCT///TATGTTAGATGCTATTGAAATTCATCCTGCACCTGCTTCTGTGGCGCCAAGAGGGAATCT
A_73_P034726,A_73_P306106,A_73_P365636|538465	0.000512795	3.03024e-06	up	3.44133	3.44133	1.78296	TRIB3	Bos taurus tribbles pseudokinase 3 (TRIB3), mRNA [NM_001076103]	TGGAAAGTCTCAGGTTCAGGACCCTACATTAACACTATGGGTTTATATGCCATGAGTGTG///AGTGCAAAACATGAGGCTGGTCCTCATCTTACTGAAAAGAGTAATTTGGAGTGAGGGCCT///TGGAGCTGGATGATGACCTAGACACTGAGTGTCCCAGCCAGAAACAAGCTCGAAGTGGGC
A_73_P407901,A_73_P332701,A_73_P050571|515249	0.00129353	9.09179e-05	up	3.44121	3.44121	1.78292	CKAP2	Bos taurus cytoskeleton associated protein 2 (CKAP2), mRNA [NM_001098032]	ATGGAAAACAACCCTCCTAGAAATGTGTTTCAAGACTGTGAAAAAGAGCAAGATGACAAA///ATGTTAAAAGACCATTATCCTTGCGTGTCTTCACTGGAACAGTTAACAGAGTTGGGCTGT///GCTGATGGGTCTTTGGAACTTTAAATCTGAGTTCCTTTCTTAAGTTCCTTTTTTAACTTG
A_73_117790|281817	0.0026437	0.000359288	up	3.44103	3.44103	1.78284	HINT3	Bos taurus histidine triad nucleotide binding protein 3 (HINT3), mRNA [NM_174341]	GTCATTGACTTTGTTTTAATGGCTCCTGTCTAAGGTATAAGATACTCTAGATAAAATCCC
A_73_120394	0.0314483	0.0120977	up	3.4324	3.4324	1.77922		olfactory receptor family 10 subfamily J member 1 [Source:HGNC Symbol;Acc:HGNC:8175] [ENSBTAT00000064894]	TGACTTTGATCATCAGTGTTTTCGTGCTCGTTGTGCCTATGGGTCTGGTCTTCATCTCTT
A_73_119874	0.000750779	2.42958e-05	up	3.43079	3.43079	1.77854		Rep: TonB-dependent receptor precursor - Pseudomonas fluorescens (strain PfO-1), partial (3%) [TC432201]	ATGATTGCAATCGCTCCCGGACCATGTCTCGGTTTGGGGTGTGTTGTATGTGTTATATTA
A_73_102591,A_73_P316251,A_73_P401146|514777	0.000489803	1.00102e-06	up	3.42805	3.42805	1.77739	BUB1	Bos taurus BUB1 mitotic checkpoint serine/threonine kinase (BUB1), mRNA [NM_001102011]	AGGTTTATATTTTGCGTAAAATAAGCAAAATTTCCCCAAATGTATCCAGCGGACTTCATG///TCTGTGGCAGACAAAGCTGATGTTCAGCAGGTTGTCATGTATTGCAAGGAGAAGCTTATT///TGAAAGCGCTTAAAACACTGACCTGTTCACTTTAAGCCAGAAAAGAGCCACGTCAGGTTT
A_73_110441,A_73_P104841|530961	0.00512582	0.00101767	up	3.42082	3.42082	1.77434	BARD1	Bos taurus BRCA1 associated RING domain 1 (BARD1), mRNA [NM_001192701]	CAAAGTCTGGATGGCTCCTTCCAGCTGGTTTATAGATTGTGTGATGTCCTTTGAGTTGCT///CTGTGAAAAATGATGAAAATGCTCAGCAGACCTCCATGTACGAATTTGTCTCTCCGAGCC
A_73_P211552,A_73_P090241,A_73_P368151|516929	0.00109501	6.41769e-05	up	3.41468	3.41468	1.77175	CSRNP2	Bos taurus cysteine-serine-rich nuclear protein 2 (CSRNP2), mRNA [NM_001192458]	AAACACAGGACTTCCAGGAGTTCATTGCCGAGAACGAGACGGCGGTGATGCACCTGCAGA///AAGATATTGATGTGGAAAATGTGGAGGTGGATGATTACTTCTTCCTGCAGCCTCTGCCCA///AGAGGAAGTTTGATGATGTGGATGTGGGCTCATCAGTTTCCAACTCCGATGATGAGATCT
A_73_P046746,A_73_P373176|514564	0.000941886	4.39829e-05	up	3.41174	3.41174	1.77051	ZWINT	Bos taurus ZW10 interacting kinetochore protein (ZWINT), mRNA [NM_001040529]	GACTGGCTTTTGTGATTCTCTGTTGTATGTTTTGTTCTGGTTCATTGATTTGTAGTAGTA///AAGAGCTGAAGGCCACATATCAAGAACATGTGGAGGTTATCACAAATTCCCTGACCGAAG
A_73_P036571,A_73_P481590|788039	0.00100602	5.34105e-05	up	3.40918	3.40918	1.76942	ARL4C	Bos taurus ADP ribosylation factor like GTPase 4C (ARL4C), mRNA [NM_001102348]	AGACATCTTCCAGATGGTTTGGACCCTGTCCATGTGTAGGTCATTATCACACAAAGAGAC///CAGCGGAGACTTCGCAGGAGACAAAGCCCATCGGGAGAGACGCGATGCCCGGCCGGCGCG
A_73_P148791	0.0149433	0.00461042	up	3.40569	3.40569	1.76795		Rep: Solute carrier family 25 member 40 - Bos taurus (Bovine), complete [TC453560]	AAGTGTGCTAGATCAAGAACTACCAAGGCAGTTTCCTTGAAGAAGAGCTTTTGGTCACTG
A_73_103299|615527	0.000468303	1.62727e-07	up	3.40255	3.40255	1.76662	CENPL	Bos taurus centromere protein L (CENPL), mRNA [NM_001034782]	TCTGTTTTCCTCACAGTGCCTTTGGAGTTACCCAGATGAAAGCCAAGAAGGATCTAGAAG
A_73_P445756,A_73_117023|504282	0.000747096	2.36781e-05	up	3.40184	3.40184	1.76632	PLK3	Bos taurus polo like kinase 3 (PLK3), mRNA [NM_001075153]	TTTTATCACTGAAAACATGGAACTGAAGATGGGGGATTTTGGACTGGCAACCCGGTTGGA///ATTGACATTTATTTATTGGGATGTGAGCCCCACGAAGGGCCTCCTTCTGGGATAATAAAC
A_73_P120611,A_73_106737|505716	0.000655957	1.35573e-05	up	3.39873	3.39873	1.765	RELT	RELT, TNF receptor [Source:HGNC Symbol;Acc:HGNC:13764] [ENSBTAT00000021927]	TGAGGAGAACCGCTATGTGGTCCGGCTAAGTGAGAGCAACCTGGTCATCTGAGGAGCTGT///TTATTTATTGAAACTTGGCTGTTGTCACATCCTTGTGTCTCACATACTCATCCATTGTTG
A_73_117200|616874	0.00194598	0.000205656	up	3.39671	3.39671	1.76414	CENPQ	Bos taurus centromere protein Q (CENPQ), mRNA [NM_001078065]	CAAATAGATAATGGGGTACTCTCTCTTCCTGAACTTTCTCAAAAGAGTCTCAGAGCACCC
A_73_102351,A_73_P327121|529235	0.000468303	1.29066e-07	up	3.3947	3.3947	1.76328	DDIT4	Bos taurus DNA damage inducible transcript 4 (DDIT4), mRNA [NM_001075922]	TACATGAAGATACTCGCTGTTCATGAATACACTTGATGTTCAAGTATTAAGACCTATGCA///TCTTTGTTTTTGTTTTTTGATCATAGCTTCACTACTGACCTGTTCGAGGCAGCTATCTTA
A_73_101891|512361	0.0140511	0.00424484	up	3.38858	3.38858	1.76068	LAPTM5	Bos taurus lysosomal protein transmembrane 5 (LAPTM5), mRNA [NM_001046118]	CACCAACACCCCTTGTGCTACTGCTTTGTGTGATGGGGAAGAAGTTTTAATAAAGCAGCA
A_73_105523|540666	0.00220417	0.000261638	up	3.38811	3.38811	1.76048	HDAC8	Bos taurus histone deacetylase 8 (HDAC8), mRNA [NM_001076231]	CTTCAGTTTCACCTCCAAAGTCATGACGGTGTCCCTGCACAAATTCTCTCCAGGATTTTT
A_73_P083576,A_73_P083571,A_73_P083581,A_73_P040741|507002	0.00146575	0.000117246	up	3.38455	3.38455	1.75896	OLFM1	olfactomedin 1 [Source:HGNC Symbol;Acc:HGNC:17187] [ENSBTAT00000061530]///Bos taurus olfactomedin 1 (OLFM1), mRNA [NM_001101879]	AGGAAATTGGCGCCTATGACTACGATGAACTGCAGAGCAGAGTGTCCAATCTTGAAGAAA///GAGTACATCGACATCCCCTTCCAGAACAAGTACTCGCACATCTCCATGCTGGACTACAAC///TTGCAGTACGTGGAGAAGATGGAGAACCAGATGAAAGGGCTGGAGTCCAAGTTCAGACAG///TGACTCAAAGCATGTAACCTTAAGATGTTGCATTCTAAACTGACAATAAAGACCTTTCCC
A_73_107637|519016	0.00108511	6.28122e-05	up	3.38151	3.38151	1.75767	CDT1	chromatin licensing and DNA replication factor 1 [Source:HGNC Symbol;Acc:HGNC:24576] [ENSBTAT00000054406]	AGGAGGAAGCAGCTGTGCCCTCCCATGCCCCGGATCTTGTATTTGGTCTCTAGACTGTCA
A_73_P492433	0.00433437	0.000791951	up	3.37941	3.37941	1.75677		GB	TTTTCACAGGAAATAGGCCTGGCATCTCTGGGAGCATCGGATGAAGATGTTCAGAAACTA
A_73_P081071	0.0391214	0.0159536	up	3.37477	3.37477	1.75479		Hw_loin_14_050628_F04 Bos taurus CF-24-HW loin cDNA library Bos taurus cDNA, mRNA sequence [DV795077]	CTGGGTGTGGGTGCTTGTATTTTTCTATTTCCAGTCACTTTAAGGTTGTTCACAAACTAA
A_73_P102951,A_73_114618|497011	0.00197647	0.000211981	up	3.35579	3.35579	1.74665	ID1	Bos taurus inhibitor of DNA binding 1, HLH protein (ID1), mRNA [NM_001097568]	ACGTCATCGACTACATCTGGGATCTGGAGTTGGAGCTCAACTCGGAATCCCACGTCGGGA///CAATGATCACCGACTGAGAATATTGTTTTACAATAGTTCTGTGGGGTGTTTTCTTTTTTG
A_73_P051021|538846	0.00054871	4.18912e-06	up	3.35465	3.35465	1.74616	JAM2	Bos taurus junctional adhesion molecule 2 (JAM2), mRNA [NM_001083736]	CAGAGCTCACTCACCTGGTATGTGTCCTTGACTTCTTCATTAAACATCATTTTGAGAGTC
A_73_P287931,A_73_107052|526377	0.000645456	1.01697e-05	up	3.35348	3.35348	1.74566	GMNN	Bos taurus geminin, DNA replication inhibitor (GMNN), mRNA [NM_001025337]	AACTGCCAAAGTTTACCTCCGCTGTAGTTCTTTGTAGCAGAACAAATAACTTTATAATGA///TGTGTTTTTAATCTATGGTGTTCTGTGTAAATAGCATTTTCTCAGTTGTCAGACATGACC
A_73_110308,A_73_102385,A_73_P443496,A_73_P302656|537127	0.000489803	9.06709e-07	up	3.35034	3.35034	1.74431	KIF4A	Bos taurus kinesin family member 4A (KIF4A), mRNA [NM_001206105]	ACGGCGATGGGAATGATGAGGAATGGAAGCCAACAAAATTAGTTAAGGTGTCCAAGAAGA///CGAGGCTGAGGCTGTCTTATCTCGAGGTTGTCTCAGCTTAATGGCAGAGCCTGCTCTGTG///CTCAGAGTCGAAAGATGTAGCAACAGAAACCCAAGGAAATAAAGCTCCGGGGAAGAAAAA///TCAGAGGATTCCATTAAAAAGCAGATTGAAAGCCTAGAGACTGAAATGGAACTCAGGAGT
A_73_P030731|525072	0.0101577	0.00274122	up	3.34825	3.34825	1.74341	PLA2G4A	Bos taurus phospholipase A2, group IVA (cytosolic, calcium-dependent) (PLA2G4A), mRNA [NM_001075864]	GTGTATGAGTGTAATTCACTGACTGGATTTATTCATGCCATGAGACAACACTAGTTTTTA
A_73_115493	0.000766072	2.55653e-05	up	3.33939	3.33939	1.73958		Rep: MGC143103 protein - Bos taurus (Bovine), complete [TC415580]	CTGACTGTCCTGTGACCAAGCCAATGCCGGCAGCCACCCTCCTCCAGGATTCTTGTAAAT
A_73_107593,A_73_P253761|353300	0.00137421	0.0001043	up	3.3392	3.3392	1.7395	RHEBL1	Bos taurus Ras homolog enriched in brain like 1 (RHEBL1), mRNA [NM_181668]	CTGTCCTCTAGCTCTGTTTTTGCTAAATATATGAACTGTGATAACCTATGGGGTTGGTAT///ATTTATGGAGTCATCTGCTCGAAATAATCAGCTGACTCAAGGCATCTTCACCAAAGTCAT
A_73_117450,A_73_101712,A_73_P301026|767818	0.000738098	2.24729e-05	up	3.33525	3.33525	1.7378	PRC1	Bos taurus protein regulator of cytokinesis 1 (PRC1), mRNA [NM_001076543]	TGGTTCTTGGAAGCTTACAGGTGTGGATTTGGTCTGTTAGTCATGCGTATACATGTACTG///ACAAGAACTGAAAATTCTTCAAGAACAAGATCAAGAACTGTGTGAAATTCTTTGCATGCC///GTTATATTTCACCTTTGAGTAGGAAAATGACTGTGTCCATCCTTGGGGTATGGGACATGA
A_73_100415,A_73_P437446|512459	0.0140278	0.004233	up	3.33273	3.33273	1.7367	GAD2	Bos taurus glutamate decarboxylase 2 (GAD2), mRNA [NM_001205723]	AATAACCTAGCTCACTAAGCTGTTTCAATTCTCTAGGTAGACAATTAAGTTGTCACAAAC///TGACCTTGAAAGAAGGATCCTTGAAGCCAAACAAAAAGGGTTTGTCCCTTTCCTTGTGAG
A_73_109654|618239	0.00100662	5.39014e-05	up	3.33032	3.33032	1.73566	MND1	Bos taurus meiotic nuclear divisions 1 (MND1), mRNA [NM_001038223]	CTTTGACTACATAGACTAAAACGTTCCATGTTGTTGATGGTGAAGGAGCTATGTGCTCGT
A_73_P066551|100302388	0.0207718	0.00709414	up	3.32218	3.32218	1.73213	SMIM5	Bos taurus small integral membrane protein 5 (SMIM5), mRNA [NM_001163000]	AGAAAACCATCAGGGATTCTTTGCCGACCTGCACTTTTTAACAAAGCACAGAGCGTAGTC
A_73_115943,A_73_P338101,A_73_P368881|540245	0.000844201	3.23902e-05	up	3.31726	3.31726	1.72999	NR4A2	Bos taurus nuclear receptor subfamily 4 group A member 2 (NR4A2), mRNA [NM_001076208]	TGTTACGTGGGTGGCATGAGTTGAAGAAGGCAAAGGCTTGTAAATTTATCCAATGCAGTT///AGAGTTTGTCAAGTTTAGCATGGACCTCACCAACACTGAAATCACTGCCACCACTTCTCT///TTCTAAGACCTCCTTCCATGCACTTCAGAGAAACTGGAAAGAAACCTAAAACTGTCCAGA
A_73_112707|615813	0.00591443	0.00126905	up	3.31384	3.31384	1.7285	ITPKA	Bos taurus inositol-trisphosphate 3-kinase A (ITPKA), mRNA [NM_001083519]	AGAGCTACCTGCAGTTGCAGGACTTGCTCGACGGTTTCGATGGGCCTTGCGTACTAGACT
A_73_P494203	0.000933561	4.29815e-05	up	3.3128	3.3128	1.72805			ATACTAATTGCCATTTCTTCAAGCCCTGCAGCATGTCATACTCAGAGCATCAGCATTAGC
A_73_P406076,A_73_106618,A_73_P074391|535369	0.000699123	1.81525e-05	up	3.31105	3.31105	1.72729	E2F1	Bos taurus E2F transcription factor 1 (E2F1), mRNA [NM_001206079]	TAAGAGCAAACAAGGCCCCATCGACGTTTTCCTGTGCCCTGAGGAGAGTGTGGGTGGAAC///GCGAGGCCTTGGCCTGCTTGTTGGCAGGACAGCGAGAGCACTTCTATCGTCTTAAAGGTT///GAGGGCATCAGAGACCTCTTCGACTGTGACTTTGGGGACCTCACTCCCCTGGATTTCTGA
A_73_P412806	0.00288347	0.000415796	up	3.30427	3.30427	1.72433		PREDICTED: Bos taurus phosphodiesterase 4D, cAMP-specific, transcript variant 1 (PDE4D), mRNA [XM_588063]	CGGTGAGCTGCACTGACCTCTACATTTTGTATGATATGTAAAACAGATTTTTTGTAGAGC
A_73_P050266|788085	0.000512795	3.47196e-06	up	3.302	3.302	1.72334	TMEM158	Bos taurus transmembrane protein 158 (TMEM158), mRNA [NM_001081626]	AAGTCGATCTATCCAGTGACGTGGCCAGATGGGCGTTTCTTCTTGTACTCTGTGTTTTTT
A_73_P385296,A_73_P248741,A_73_110891,A_73_P339766|514405	0.000682395	1.64891e-05	up	3.29688	3.29688	1.7211	PLK4	Bos taurus polo like kinase 4 (PLK4), mRNA [NM_001083427]	AAATTGCAACTCGAAGTGCACATGGACTTGAATCTGATATTTGGTCCTTGGGCTGTATGT///TTCATGGGGCAATCAAGAACAAGAAACCAGTAATAGTGGAAGGGGAAGAGTAATCCAAGA///TATTGTTATCCCTACTTTAGACATGTTAAGAATCATGGACAAAACATGCTGGAGTTTCTG///AGAATGATCATAAATAGTGCTGCTTCTCCAAAACAGGCACCAGTACTTAATCCTCCTGTG
A_73_114387,A_73_P277251|538949	0.00156515	0.000132653	up	3.29333	3.29333	1.71955	ESCO2	Bos taurus establishment of sister chromatid cohesion N-acetyltransferase 2 (ESCO2), mRNA [NM_001101182]	TAGCTTCACTCTGGCAGTAAGACTCTAGGGAAGTAGTGTCCAGGTCATAACTCTGTAGAA///AGGTTTGAGACAAGGCAAGCGCCAAAGTGTGTGTTAGTAGAAAAAGAACTGAACGTTGAG
A_73_109512|540135	0.000655957	1.31634e-05	up	3.29132	3.29132	1.71866	PHLDA1	Bos taurus pleckstrin homology like domain family A member 1 (PHLDA1), mRNA [NM_001105631]	GCCATTCTGGCGGTCAAGTCCACGCGGCAGAAGCAACAGCACTTGGTCCAGCAACAGCCT
A_73_P039976|505103	0.00132248	9.47217e-05	up	3.29015	3.29015	1.71815	PHGDH	Bos taurus phosphoglycerate dehydrogenase (PHGDH), mRNA [NM_001035017]	TGCTTGTGTCTCCTCTGACTCCTATCTTTCTGTGGTACAGCAATCACCTCCCAATAAAGA
A_73_111209,A_73_P251601|618880	0.00131205	9.32258e-05	up	3.28989	3.28989	1.71804	VRK1	Bos taurus vaccinia related kinase 1 (VRK1), mRNA [NM_001038224]	TCATGTGAGTCTTGTGGAAGTGGGGGTAACAATGAAGTACCTATGTGTTTGAAAAGCAGA///ATATTCTTTTGCAAGGACTGAAAGCTATAGGAAGTAAGGATGATGGCAAGCTGGACCTCA
A_73_P426281,A_73_P040781|523998	0.0143057	0.0043506	up	3.289	3.289	1.71765	NEK2	Bos taurus NIMA related kinase 2 (NEK2), mRNA [NM_001046270]	AAAGCTGCAGGACTCCAGCCCTGTGTTGAGTGAGCTGAAACTGAAAGAAATACAGTTACA///GCCCGATCCGGTTGCATGTATATGTCAAAGTGTGATTGTTTAATATCTACATATGCTCTG
A_73_P107666,A_73_P049591,A_73_100958|327712	0.00811107	0.00200021	up	3.2794	3.2794	1.71343	CCL5	Bos taurus C-C motif chemokine ligand 5 (CCL5), mRNA [NM_175827]	CAACCCAGAGAAGAAGTGGGTGCGAGAGTACATCAACGCTTTGGAGTTGAGCTAGGGTGG///AACCTGAACTTGCGCCAACTTTGCTTCTCGCTCTTGTCCTAAGCAGCTTGGGAGGCTCCC///CCCCATCTCGGTCCCTCACTGGGGAGGGCTGCACTGGCAAATAAGAAGAAATCAGCTGTT
A_73_P040961|618810	0.00131434	9.34881e-05	up	3.27394	3.27394	1.71103	PHLDA2	Bos taurus pleckstrin homology like domain family A member 2 (PHLDA2), mRNA [NM_001076521]	TCTTAACGTTTGTACTCCACCACCATTCCAATAAAGCACTCGGTTCATTCTCTTTTCTAT
A_73_101651,A_73_P353301|513678	0.00120798	7.73722e-05	up	3.27384	3.27384	1.71098	CHEK1	Bos taurus checkpoint kinase 1 (CHEK1), mRNA [NM_001098023]	TGATTGGTCTTTCAAATAGAAGTTGAGCATAAACTCTAGTGCTTAACTACCTTTACTTGG///ATAATCCCTGAAGAGTTGTCTTCCCTCTAGCCAAACATTTTCCAATTCTTTTGTATATTC
A_73_118081,A_73_P087106|540944	0.000655957	1.34792e-05	up	3.27201	3.27201	1.71018	TRAF1	Bos taurus TNF receptor associated factor 1 (TRAF1), mRNA [NM_001192801]	CGGGTCAGGACCTCTGAGCCACCCGCAGATGCTGTCCTTTTGTGTGTATAAAACCAGAGA///ACGTGAAGGACGACACCATGTTCGTCAAGTGCGTCGTGGACACTAACACTTAGAGCGGCG
A_73_P291166,A_73_P078201|536628	0.00126246	8.60024e-05	up	3.27011	3.27011	1.70934	ACSL4	acyl-CoA synthetase long-chain family member 4 [Source:HGNC Symbol;Acc:HGNC:3571] [ENSBTAT00000054636]	GTCCCGGAAATCATGGATAGAATTTATAAGAATGTTATGAGCAAAGTCCAAGAGATGAAT///ATACCATGAAACTGGAGCGATTTGAAATCCCAATCAAGGTTCGATTAAGCCCAGAGCCCT
A_73_104207|539251	0.0137978	0.00414521	up	3.2615	3.2615	1.70553	AUNIP	Bos taurus aurora kinase A and ninein interacting protein (AUNIP), mRNA [NM_001083742]	GATTCCCGGCGCGGAGCAAACATGAAAGCAGTAAAACAAAGCTCTTGCCCTATTCCTGGG
A_73_108548,A_73_P376061,A_73_P405546|531369	0.00062678	8.64785e-06	up	3.26135	3.26135	1.70547	TTF2	Bos taurus transcription termination factor 2 (TTF2), mRNA [NM_001080735]	TTGGCTTTCAGTTTCACCTTCAAGCCTGATGCCCTTCTCCAAGCGAGGATGAATTATCAT///TCAGAACAACTTGTTGGACATGTATTCACTGCTGAAATTTCTCCGTTGTTCTCCATTTGA///AGAAGAGGAAACTAAGCCTTTGCCTCCAATTGTTCACAGTCAACACTCAATAAGCCAGCC
A_73_P251741,A_73_P050896|408005	0.000609441	7.74674e-06	up	3.25152	3.25152	1.70111	HEY1	Bos taurus hes related family bHLH transcription factor with YRPW motif 1 (HEY1), mRNA [NM_001001172]	TTGCAGATGACGGTGGATCATCTGAAAATGCTACACACTGCAGGAGGGAAAGGCTATTTT///GTTGCCAACATCACCTTAAAGTCATCGGTAAAATAAAAAGGAAAAAGGTACACTTTCAGA
A_73_P506178,A_73_121147|510420	0.00152536	0.000125798	up	3.24247	3.24247	1.69709	MYBL2	Bos taurus MYB proto-oncogene like 2 (MYBL2), mRNA [NM_001075448]	CCTTCCTTCAACTTGTTGGTGCATTTTCTTGAAAGAATAAAAGTTGTCTTTTTCCTGGGC///GTTCTCATGTTTACAGGGGGCTGGGGGCCGATTCTGGGCTGTGAGTGAGAATCACACTCA
A_73_P033981|513666	0.00421549	0.000758519	up	3.23463	3.23463	1.6936	HIST2H2AC	Bos taurus histone cluster 2, H2ac (HIST2H2AC), mRNA [NM_001081720]	CCAAAGAAAACCGAAAGCCATAAAGCCAAAAGCAAATAAAGCCTTTTCAAAGTAAGCCAA
A_73_121134|506746	0.000644373	9.98096e-06	up	3.23273	3.23273	1.69275	TRIP13	PREDICTED: Bos taurus thyroid hormone receptor interactor 13 (TRIP13), mRNA [XM_002705602]	CAGATGTAAAATGAATCGGCCAATAATTGGTGTATTCCACAGAACCTTGTTTTGCTTTTA
A_73_P044516|513043	0.000699123	1.803e-05	up	3.22921	3.22921	1.69118	NXT2	Bos taurus nuclear transport factor 2 like export factor 2 (NXT2), mRNA [NM_001100353]	GCTGGAACTACTCTTATATGGACTAGACTGTATTTTTGACATGCGCATATTTTTGTAACT
A_73_104838	0.000910102	4.03166e-05	up	3.22895	3.22895	1.69107		Rep: DNA topoisomerase 2-alpha - Sus scrofa (Pig), partial (18%) [TC421298]	TTTCCATTTATAAACTTTTCAAGACCTTCCTGCATTCATTACATGTGTGTGACTTGAGTG
A_73_P082152,A_73_P082146|788926	0.000468303	3.61662e-07	up	3.22189	3.22189	1.68791	HK2	hexokinase 2 [Source:HGNC Symbol;Acc:HGNC:4923] [ENSBTAT00000060994]	AGAAAATGATCAGCGGCATGTACCTGGGCGAGATTGTTCGTAACATCCTCATCGATTTCA///GAGTTTGGTTCCCAAGCCTTGGCTCTCCTGAGATAAATACAATTTGTTCACACTTTTCAC
A_73_118320,A_73_P349171|518653	0.000781904	2.65733e-05	up	3.21387	3.21387	1.68431	POLE2	Bos taurus DNA polymerase epsilon 2, accessory subunit (POLE2), mRNA [NM_001105383]	TAGAAGATAGCAAACTTCAAGGGTTTTGAGATTCTTAGACCATCTGAAGAAACAGAATTC///CTTCAAGGGTTTTGAGATTCTTAGACCATCTGAAGAAACAGAATTCATCAATCATCTGCT
A_73_110539,A_73_P042626|513727	0.00393283	0.000683314	up	3.20885	3.20885	1.68206	OVOL1	Bos taurus ovo like transcriptional repressor 1 (OVOL1), mRNA [NM_001081521]	AGAGATAGGACTTCCTTCCCAGATGAGGTATGGGAAGGTGATTCTCTCATCCCTCGCCTC///AGTTGCAAAGCTCTGTGTTGTCTGTTTTATTTTATAACTTTCCCCTCAGCTAGCAAAATA
A_73_119522	0.00134161	9.92066e-05	up	3.20506	3.20506	1.68035		Rep: Liprin-alpha-1 (Protein tyrosine phosphatase receptor type f polypeptide-interacting protein alpha-1) (PTPRF-interacting protein alpha-1) (LAR-interacting protein 1) (LIP.1). - Bos Taurus, partial (24%) [TC452184]	CCTAAAATACTGTGTTGAAAAGTGTGGATGTACATCATGGTAAATCAGCTGTACTGGAAT
A_73_P077206,A_73_P451641,A_73_104029|503620	0.000709557	2.00475e-05	up	3.20412	3.20412	1.67993	FLT1	Rep: Isoform sFlt1 of P17948 - Homo sapiens (Human), partial (41%) [TC407676]///Bos taurus fms related tyrosine kinase 1 (FLT1), mRNA [NM_001191132]	CGGATCTCCAAATTTAAAAGCACGAGGAATGATTGTACCGCACAAAATAATGTAAAACAT///ATTGACCAACGCAATCCCCACAATAATGTATTCTACAGCATCCTTGTTATTGACAAAGTG///GGACTTCTTCCAGGAAGATATTTCTGCTCCAAAGTTTAATTCAGGGAGTTCTGATAATGT
A_73_P282676,A_73_P502973,A_73_115286|506932	0.0015602	0.000131937	up	3.20025	3.20025	1.67818	CHST1	Bos taurus carbohydrate sulfotransferase 1 (CHST1), mRNA [NM_001083648]	TGGACCTTGTTTATTTCTTCCAGTCTGTGGCAACGCTGTCTGTCTGTCTGTCTGAGTTTT///TTTGACCTCACATGCTGGAGAAGCAGCCCCATGAAGGTGCCCAGCCATGCAATGTTCCTG///TGGTTTTCTGATTGATCTTGGGGTCCATCTGTGATATCTCTTTGTGCCAAAAAAGAAAAA
A_73_P092526|614974	0.000682395	1.64769e-05	up	3.1995	3.1995	1.67784	HIST2H2AB	histone cluster 2 H2A family member b [Source:HGNC Symbol;Acc:HGNC:20508] [ENSBTAT00000045062]	GAAAGGGTGGGGGCCGGCGCACCTGTGTACTTGGCGGCAGTGCTGGAGTACCTGACCGCG
A_73_P060806|786629	0.0255633	0.00929488	up	3.19604	3.19604	1.67629	E2F8	Bos taurus E2F transcription factor 8 (E2F8), mRNA [NM_001191234]	TAATTTTCCCTCTTTTCAAGTAACACCTTTGAAGCTAATGGTCTCACCAACTTCCATGGC
A_73_P271891	0.00054871	4.27131e-06	up	3.19067	3.19067	1.67386		Rep: Peptidase S1 and S6, chymotrypsin/Hap precursor - Methylobacterium sp. 4-46, partial (7%) [TC412565]	TGTCTCATGTAATTTGCATTACATTGGTGGGTTGTTCTAGTACTGTATTTGGCTTCTTCT
A_73_P395436	0.00143709	0.000112895	up	3.18981	3.18981	1.67347		Rep: Chromosome-associated kinesin KIF4A (Chromokinesin). - Canis familiaris, partial (9%) [TC464697]	AACAGCACCCTTAGTTGTCTTTCATGTTGCTGGGAGGTAAATGAAATCTTTTTAAATGTT
A_73_102626|520088	0.00108867	6.30622e-05	up	3.18761	3.18761	1.67247	MELK	Bos taurus maternal embryonic leucine zipper kinase (MELK), mRNA [NM_001111260]	AACTGTTTACTTTCTTGGAGTCACTTCCATACATGATTGTAAGCTCTTAACTATGTCTTC
A_73_P031591,A_73_P172857|534254	0.00242775	0.000309613	up	3.18582	3.18582	1.67166	MTFR2	Bos taurus mitochondrial fission regulator 2 (MTFR2), mRNA [NM_001017948]	CCAAGATAGTCATACTTTGAATCATAGATTGAACCCCCTAAAAAACTTGAGGTGATAAAG///AACTTCTTCCTTTAGAACCTTGTCCCAGGCCTAATTTTGAGCTGGTTCCGCTCTTGAACT
A_73_P258181,A_73_P037121,A_73_P324326,A_73_P254421|528013	0.000509628	1.15348e-06	up	3.1852	3.1852	1.67138	SMTN	Bos taurus smoothelin (SMTN), mRNA [NM_001076879]	TGATGCAAACTAAGACCTTCTCCTCTTCATCATCCAAGAAGATGGGCAGTATCTTCGACC///TGTCGCGGCACCTTCCCACGCAAACACGCAGCGTTTTGATAAATTATTGGTTTTCAACGA///AACAAGATGCTGGATCAGACTACGGACTTTGAGGAGCGGAAGCTCATCCGGGCTGCACTG///ACCATGTGAGGTGCCGAAGCCAGAGGAACAGAAGCAGCAGGTGGAGGTCCCAGAGCCAAC
A_73_P093871|617456	0.00178925	0.000173895	up	3.18047	3.18047	1.66924	HJURP	Holliday junction recognition protein [Source:HGNC Symbol;Acc:HGNC:25444] [ENSBTAT00000042677]	AGATAAAGCACGTGCGGGAGTTCGATATCAAAAAGAAGGCTTCTCAGTGAAGTTCAACCC
A_73_P365411,A_73_P340631,A_73_112202|526331	0.00102736	5.62853e-05	up	3.17772	3.17772	1.66799	GALNT16	Bos taurus polypeptide N-acetylgalactosaminyltransferase 16 (GALNT16), mRNA [NM_001101127]	TGATTGACAAGTCCTGGTTTAACCACTTGGGAAAGTATGATGCTCAGATGGACATCTGGG///TTGGGACGGGAATCTTGGGCCTCTCTTACTGAAAGTAAGAGGACTGCCATTCAGCCTTTC///TGATTGGACCGGGCTCAGCACCTGTCAGCCTCCTTTGGGACTCAGCCCTGTTCTGTTTTT
A_73_116285,A_73_P038186,A_73_P209012|506097	0.000242025	9.21088e-09	up	3.17044	3.17044	1.66468	NFIL3	Bos taurus nuclear factor, interleukin 3 regulated (NFIL3), mRNA [NM_001075240]	CAGCAGTTGCATTTCTGTCATCAAGCACTCTCCTCAGAGTTCTCTGTCTGATGTTTCAGA///TTATCACTCTGCCTTGTGTATAGTCAAATAGTCCATCGCAAAGACTGTATATATTGAACA///TAATTCTACAGCTGTGTACTTTCAAGACTACCAGACTTCCAAATCCACTGTGAGCGCCTT
A_73_P063246,A_73_P063241,A_73_P303386,A_73_P467728|541135	0.0018306	0.000183349	up	3.16169	3.16169	1.6607	KIF15	Bos taurus kinesin family member 15 (KIF15), mRNA [NM_001192832]	AGGTGTTTTGGTGAAACCCTATCAACGCTTAATTTTGCTCAAAGAGCCAAGCTGATTAAA///CAGGCTTACTGAGGAGTCAGAAAAGTTGCGTGCTGAAAATTTATTTTTAAAAGAAAGGAA///CTATGACAACTTACAAGAAGTGATGAAGTTTGAAATTGACCAACTTTCAAAAAGCCTCCA///GGACTGTACATAAGGGAGCATATTAAGAAGGGGGTCTTTGTTGTTGGTGCAGTAGAACAG
A_73_P169364,A_73_P203047,A_73_P044891,A_73_P494510|534910	0.000609441	6.77399e-06	up	3.15687	3.15687	1.6585	CD200	Hw_FAT_14_050513_C01 Bos taurus CF-24-HW fat cDNA library Bos taurus cDNA, mRNA sequence [DV775461]///Bos taurus CD200 molecule (CD200), mRNA [NM_001034620]	CATTGGACCAAGCTGGTGACTTTTTCAGTATCTTTTGCTTTCTTGTCTGTATCCAGTGAC///CACTCTCTTTGTACAGCCGACAGTATTCCTTCACTATCAACTATCTGAATATCACCTAAA///TAATTCTTCTGGTCTTAATCTCAATTCTACTCTACTGGAAACGTCATCGGAACCAAGATC///CAGTATCTTTTGCTTTCTTGTCTGTATCCAGTGACTTAGGAACTAAAACTTAAGTTGTCT
A_73_P090316,A_73_P405576,A_73_P440926,A_73_117317,A_73_P099886|539882	0.00100694	5.39951e-05	up	3.14468	3.14468	1.65291	TUBA1B	Bos taurus tubulin, alpha 1b (TUBA1B), mRNA [NM_001114856]	TATGACATCTGTCGTAGAAACCTCGACATTGAACGCCCAACCTACATGAATCTTAACCGC///AAGAAGGAGAGGAATATTAATTACCATTCCTTTCAGCCTTGCAGCATGTCATACTCAACC///ATCTTAACCGCCTTATTAGCCAGATAGTGTCCTCCATCACTGCTTCCCTGAAGTTTGATG///CGCTTTCAACTATGATCATGTATTGCTTTTCCATGTGTGTCTGTAACACTTATGTCCTGT///ACCTCGTCTTGGACCGAATTCGGAAACTGGCTGACCAATGCACAGGTCTTCAAGGCTTCT
A_73_109317|511755	0.00193017	0.00020267	up	3.13829	3.13829	1.64998	SFXN3	Bos taurus sideroflexin 3 (SFXN3), mRNA [NM_001101946]	AGTGAGATCCTCTAAGAGCACCTTCCTGCTTCCCGCAACCAACCGCCACCAGTAATAAAA
A_73_P042831|613904	0.00734881	0.00174358	up	3.13718	3.13718	1.64947	VGLL4	Bos taurus vestigial like family member 4 (VGLL4), mRNA [NM_001099128]	TATTCGCAAAAGCCACGTGGTGGGGTTTCTATTGTGTTTCGTTACTTGCTTGGTCTTCGT
A_73_110791	0.00136332	0.000101746	up	3.13356	3.13356	1.6478		Rep: Endoplasmic reticulum resident protein ERp27 precursor - Bos taurus (Bovine), partial (45%) [TC440382]	TTTGTCACTGAGCAGCCATGTGACTTGGGCAGGTCACAAAACACTTTCTTGGCTTCAATT
A_73_P466233,A_73_113885|507864	0.000655957	1.24857e-05	up	3.13348	3.13348	1.64777	KNSTRN	Bos taurus kinetochore localized astrin/SPAG5 binding protein (KNSTRN), mRNA [NM_001038055]	GGTGAAGGTATAGATAGCAATAACAGGTATGAAACAATACACCTTGGAGCTTTTAATCTA///CTGCAGTAGGATTAAAGATAGTTGATGTTGGAATGGCAATTCCTCCCTTAAGCAAGCATT
A_73_110658,A_73_P389796|511595	0.000826387	3.03495e-05	up	3.11471	3.11471	1.6391	PARP8	Bos taurus poly(ADP-ribose) polymerase family member 8 (PARP8), mRNA [NM_001192298]	ATATGGGTCGTCCCAAATACTGATCATGTCTGCACAAGATTCTTTTTTGTCTATGAAGAT///TTGTGGAAAAAGCAAATCTAAACTGAAATCGGAGCAGGACGGGATCTCCAAGACGCACAA
A_73_113610	0.00065224	1.0795e-05	up	3.11397	3.11397	1.63875		LB01361.CR_G22 GC_BGC-13 Bos taurus cDNA clone IMAGE:8440944 5', mRNA sequence [EH156889]	GCTAACAGCAAAGAAATAAGCTATTCTTGAATGATACAGGGATTTGGAAGAGCATAATTC
A_73_P322881,A_73_101356,A_73_P362916|281860	0.000779426	2.63111e-05	up	3.10781	3.10781	1.6359	IL1RN	Bos taurus interleukin 1 receptor antagonist (IL1RN), mRNA [NM_174357]	ATCTGGAGATGAGATCAAGCTCAAGTTAGAGGCCGTGAACATCACTGACTTGAACCAGAA///TGGAAAGTGTCCTGTTCTCTGTGACTTAAGCTTTGTTTTAAGATAAAAACTTGAAACCTC///GGATACCACTGAGCAATTAACGCTTTCACTTTTCAACCTTTAACAATGAAAAGTTGGCCT
A_73_103273	0.0329955	0.0128549	up	3.10758	3.10758	1.63579		PREDICTED: Bos taurus uncharacterized LOC100847429 (LOC100847429), miscRNA [XR_139471]	GGCTTGCTTGGCAGGAGCCGGTCTTTGCATGTAGCCCCTTTCCAATGTGCTGTGTACCAT
A_73_P492663|618216	0.0427116	0.0178061	up	3.10509	3.10509	1.63464	HIST1H2BA	PREDICTED: Bos taurus histone cluster 1, H2ba (HIST1H2BA), mRNA [XM_010818521]	ATCTCTTCAAAGGCCATGAGCATCATGAATTCGTTTGTCAGTGACATTTTCGAGCGCGTC
A_73_P102196,A_73_114399|415112	0.000509628	2.04897e-06	up	3.09917	3.09917	1.63188	AGR2	Bos taurus anterior gradient 2, protein disulphide isomerase family member (AGR2), mRNA [NM_001040500]	AGCTTTAAAGAAGGCATTTGCTGAAAATAAAGAAATCCAGAGATTGGCAGAGCAGTTTGT///AACCAGAGGAGGTTTTGAAAAACTCTGGAGAACGCTGAAGCACTGGTGAACCTACTGATT
A_73_P295366,A_73_111297|518896	0.00332395	0.000521186	up	3.09227	3.09227	1.62867	ADD2	Bos taurus adducin 2 (ADD2), mRNA [NM_001099009]	ATTCCGTACCCCATCCTTCCTGAAGAAGAGCAAAAAGAAGGAGAAACTGGAGTCCTGATT///CCATCACTATCCTTTCATACCTTTCTGCGGGACATTGATCTATGAGCATTGTTGGCTCCT
A_73_120990|534148	0.015145	0.00469866	up	3.09199	3.09199	1.62853	BLM	Bloom syndrome RecQ like helicase [Source:HGNC Symbol;Acc:HGNC:1058] [ENSBTAT00000027057]	AAGCACAAACCGTACTAAATGGGCATTTAAAGGTAGACTTTATGGAAACGGAAAATTCCA
A_73_104642,A_73_108628|614497	0.00119892	7.58154e-05	up	3.09118	3.09118	1.62816	AKAP2	PREDICTED: Bos taurus A-kinase anchoring protein 2 (AKAP2), transcript variant X1, mRNA [XM_005210503]///Bos taurus A-kinase anchoring protein 2 (AKAP2), mRNA [NM_001193034]	GCGCGAGAGAATGGATGATAGTAGTTACACCTCTAAGTTACTGTCTTGCAAGGTGACTTC///TAACCACTTCAATGTTATTATCCTGCTTTGGTTTTATAGTGATTGTGAGGCATTCAATGC
A_73_P096321,A_73_109263|539374	0.000938673	4.36875e-05	up	3.09079	3.09079	1.62797	FAM43A	family with sequence similarity 43 member A [Source:HGNC Symbol;Acc:HGNC:26888] [ENSBTAT00000057417]///PREDICTED: Bos taurus family with sequence similarity 43, member A (FAM43A), mRNA [XM_586734]	ATGAGGGCCGAGCTTTCGCAGCTTATTAACGACCTGGGCGAGCTCAGTTTTGGCAACGAC///CTGTGTTCTCAGAGTCCAATGTTTATATCTTTTGCTGTGCAAAAGGGACATGTAAAATGT
A_73_103849,A_73_P259141,A_73_P471573|504535	0.000609441	6.20415e-06	up	3.08952	3.08952	1.62738	CHAF1A	Bos taurus chromatin assembly factor 1 subunit A (CHAF1A), mRNA [NM_001101842]	TAATCTGCCCTTTAATAAAGCATTATTGTGATGTGACCTGCATGGGGAGGGCCTAGTCGT///ACTCAAGAGGAAGTCGGCGGGTAGCATGTGCATCACCCAGTTCATGAAAAAGCGCCGGCA///ACTAAGAAACTGGTCAGAGGCTCTGCAGAGAAGAACAAGATGAAACTGCAAAGGGATAAG
A_73_P048896,A_73_120282|280943	0.0384769	0.0156098	up	3.0783	3.0783	1.62213	TNF	Bos taurus tumor necrosis factor (TNF), mRNA [NM_173966]	TTGTCTAAATGATGCTGATTTGGTGACTGATTTGTCGCTACATCACTGAACCTCCGCTCC///TCCAGCTGGAGAAGGGAGATCGCCTCAGTGCTGAGATCAACCTGCCGGACTACCTGGACT
A_73_P373301,A_73_P339471,A_73_108872,A_73_P414386|504585	0.000643251	9.91462e-06	up	3.07618	3.07618	1.62114	SPAG5	Bos taurus sperm associated antigen 5 (SPAG5), mRNA [NM_001205549]	CAATTTCTGAGCTAAGAAACTGAAAGCTGGAGTCTGTTGCACCCCTTTTTACCTGCAACA///TACCCCAACATCAGGACCAATTGGCTTAGAGCCAGCTCTGTTTATAAAATAAAGTATATT///GGCAGATGAAGACCCAGAATCTACTCCTGTGCCCTTGCTTGGAAGTGACAAGAGTGCCTT///TGGAAAAAGGTGTCAATACCTCAGTCATGCTAGAAAATCTCCGCCAGAGCTTATCCCTTC
A_73_103345	0.00159131	0.00013917	up	3.07485	3.07485	1.62052		Rep: Cell division cycle associated 5 - Bos taurus (Bovine), partial (52%) [TC430567]	CCAGATGATGTTCAGTTGATGTTGTTACTACAGACTTTTCTCTGTCCCTGAAAAACTAAG
A_73_P306466,A_73_P037491|531234	0.000509628	2.32402e-06	up	3.06877	3.06877	1.61766	NCAPG	Bos taurus non-SMC condensin I complex subunit G (NCAPG), mRNA [NM_001102376]	CATTGCTCAGAGAGTAATGCTCCTTCAACAAGGTCTCAATGACCGATCAGATGCTGTGAA///GATGGAGGTGGAGTCCTTTGAAAAATGGCCTTTAAAATTATGTTCAGTTCTTTGCTTTAA
A_73_113219,A_73_P333671|539606	0.000742422	2.32755e-05	up	3.06679	3.06679	1.61673	PYCR1	Bos taurus pyrroline-5-carboxylate reductase 1 (PYCR1), mRNA [NM_001014957]	CCTTTCCTAGCCTGACCCACAGACGCTGTCAGCTCTGTCTCTTAACTTTTTAGGATAAAT///ACACATCATCCCCTTCATCCTGGATGAGATCGCCGCCAACATTGAGGCTCGGCACATCGT
A_73_111317	0.00195317	0.000207107	up	3.06552	3.06552	1.61613		interleukin 24 [Source:HGNC Symbol;Acc:HGNC:11346] [ENSBTAT00000010325]	AAGCAGCTGTGACCAAAGCCTTTGGAGAAATGGACATTCTCTTGAGCTGGATGGAGAAAT
A_73_P055595	0.0239052	0.00850909	up	3.06241	3.06241	1.61467		GB	ATCGTTCTTAATAATGCTGTGATGTATTTTGCAGTTGGGCTTTTCGGTGCTGTCCCCCTG
A_73_112230,A_73_P307936|281357	0.0287959	0.0108177	up	3.06183	3.06183	1.61439	NPR2	Bos taurus natriuretic peptide receptor B/guanylate cyclase B (atrionatriuretic peptide receptor B) (NPR2), mRNA [NM_174126]	GCAGTAGCCATCATCTCTCCACACATCAGAAGTGGACATTGTCACATGAGATGGAAATCA///TTTCTCCATAACAGCATTATTGCATCCCATGGGAGTCTCAAGTCCTCAAACTGTGTGGTG
A_73_107639|531488	0.0356735	0.014167	up	3.05543	3.05543	1.61138	WASF1	Bos taurus WAS protein family member 1 (WASF1), mRNA [NM_001034017]	GTGGTGCTTGTTCTTTGAAAATGTTTGGTCATTCCAGTGTTTTGCTTTCTTTTCCTTAAG
A_73_P493233	0.0060084	0.00130005	up	3.04902	3.04902	1.60834			AAATTTAGGAAAAACCAGACCTTGACTACAGGGCACTTTAACCTGCCGTTGAATTTGTGA
A_73_P052436,A_73_P400206|782916	0.0114336	0.00324	up	3.04805	3.04805	1.60789	ERCC6L	Bos taurus ERCC excision repair 6 like, spindle assembly checkpoint helicase (ERCC6L), mRNA [NM_001102530]	AAGCACTTGACATAAAAAGCTCAGATCCTGAAGTCATGCTCATGACTTTAAGTTTGTATA///CAAATCTAGATCAACTAGAGGATGATGAGGTTTTACATCATTGCAATCCCTCGCCTGCTA
A_73_P253676,A_73_111719|507095	0.000706072	1.95355e-05	up	3.04777	3.04777	1.60775	SPRY1	Bos taurus sprouty RTK signaling antagonist 1 (SPRY1), mRNA [NM_001099366]	ATGACTTAAAGGGCTCCTTGAAAGAGGACCTGACGCAGCACAAGTTCATTTGTGAACAGT///GGCCACTTCGTTAGTTAACAGCTGGGTAGTTCTAATCTTTTCTGTTTCATTGCCTTAACC
A_73_120005|529195	0.00588931	0.00125895	up	3.04637	3.04637	1.60709	MEFV		TACAAATCACTTTTGTACCTGGATTAATGAACTGTGGCTGGACCTCATAAATAAATCGCT
A_73_118171	0.00102293	5.567e-05	up	3.04486	3.04486	1.60637		HW_Fat_71_050831_D03 Bos taurus CF-24-HW fat cDNA library Bos taurus cDNA, mRNA sequence [DV776025]	TTTTTTCAAAGTGTAGGTTTGTGAATAGATTTTAGCATGATGAAACTGTCATTACAGTGA
A_73_120356,A_73_P308711,A_73_P093211|100124505	0.00281548	0.000399991	up	3.03784	3.03784	1.60305	PDE4B	Bos taurus phosphodiesterase 4B (PDE4B), mRNA [NM_001102546]	TGTTTCCAATTTAATGCTGCCGTCTTTCTCTTGCACTGCCTTCTGTGCTAACACCTGCAT///AATTCAGAACTTGCTTTGATGTATAATGATGAGTCTGTGTTGGAAAACCATCACCTTGCC///AGAAGTTTCAGTTTGAACTAACCCTCGAAGAGGAGGATTCTGAAGGCCCCGAAAAAGATG
A_73_P509143,A_73_P363601,A_73_115499|513053	0.00178925	0.000173731	up	3.03636	3.03636	1.60234	OLFML2B	Bos taurus olfactomedin like 2B (OLFML2B), mRNA [NM_001100354]	AAGTCTTTGCTGCTAGTTCTCTGCTTCGCTCTGGTTACGACTCTGGGCTGGGGGTACAGC///ATCATCAAGTATGACCTGAAGCAGCGCTACGTGGCTGCCTGGGCCATGCTCCATGACGTA///AAGGTTTCGTCATCAGGGTCTTGTAGGCAGATGGCACCAGGAGCAGGAGTGAAGGAGGCA
A_73_102944	0.00154375	0.000128137	up	3.0351	3.0351	1.60174		LB02829.CR_N23 GC_BGC-28 Bos taurus cDNA clone IMAGE:8230873, mRNA sequence [DV914254]	AGCTAGGACGTTTTTGTAGAACTGATAATGTACCTGAATCCTTTTTGAGAGAGTTGAGGT
A_73_P193927,A_73_103787,A_73_P328111|540718	0.00439292	0.000806662	up	3.02827	3.02827	1.5985	SH3RF2	Bos taurus SH3 domain containing ring finger 2 (SH3RF2), mRNA [NM_001083753]	AATAAAATGGATGACGTGACGTTACTTGATCTTCTGGAGTGCCCCGTGTGCCTTGAAAAG///GTCCACTGCCTCGGCCACGCAGACTGCGTTTCCCAGCAAATGAATCTACAGGTGGCTTTT///GAGTTGGCATCTTCCCCAACAACTATGTCATCCCCATTTTCAGAAAGACATCTAGCGTTC
A_73_P278221,A_73_114794|539090	0.00191213	0.000199174	up	3.02729	3.02729	1.59802	SPRY2	Bos taurus sprouty RTK signaling antagonist 2 (SPRY2), mRNA [NM_001076147]	AGTTGTGCCGTACTATACGGCACATTCACAAAATATTATACTAATATGTTGTACATTCGG///AGGCATCTTACAGATTTTGCCCCTTTTATGAGGATGTGATAGTTGCTGCCAATGAGGGGT
A_73_104350|618042	0.00348056	0.000559783	up	3.02314	3.02314	1.59605	VGF	VGF nerve growth factor inducible [Source:HGNC Symbol;Acc:HGNC:12684] [ENSBTAT00000013014]	ACACCTAGGTGAGGCATTGGCACCCTTGTCCAAGGCGTACCAAGGCCTGGCTGCTCCCTT
A_73_P374401,A_73_P447551,A_73_P082546|514255	0.000672094	1.5526e-05	up	3.01963	3.01963	1.59437	SLC20A1	Bos taurus solute carrier family 20 member 1 (SLC20A1), mRNA [NM_001191185]	GCTTTGCCAGTGTTCTATGCTTGCACGGTTGGAATCAACCTCTTTTCCATCATGTACACT///ATCACACCGTGCACAAAGACTCTGGCTTGTACAAAGAGCTCCTCCATAAGTTACATCTTG///CTTGTGCTCTAACTGCTTTCGTGCTAAATATGACTTGTCTCAAAACTAGCTATGTAAAAT
A_73_119727,A_73_P071761|534587	0.0015714	0.00013377	up	3.01779	3.01779	1.59349	LIN9	lin-9 DREAM MuvB core complex component [Source:HGNC Symbol;Acc:HGNC:30830] [ENSBTAT00000047257]	AGATAAACCACTTTTTGAAGGTGATAATGACTTCTGTGTGTGTCTAAAGGAATCTTTTCC///AAATTCATGTTGCACATATTCAGAGCGGCCTGAGCCAGATGGGAAACTTACATGCCTTTG
A_73_118936|514749	0.000975359	4.91094e-05	up	3.01682	3.01682	1.59303	RAD51	Bos taurus RAD51 recombinase (RAD51), mRNA [NM_001046179]	ACCTGGAATGATGTAATAAACCCCACAGTGACAGTCTCTGGAATGAAAGCTTGGTTCTTA
A_73_105536,A_73_P034641|281983	0.00103501	5.70851e-05	up	3.01582	3.01582	1.59255	PLAUR	Bos taurus plasminogen activator, urokinase receptor (PLAUR), mRNA [NM_174423]	TTCCCAGCTGTCCAGAGAGAGGGCTGTGAGAACCAGAGGAGAAAAGCTAGCAAAAGCTGC///TCCTGGAGCTTCAAAACCTGCCACCAAACGGCTTGCAGTGTTACAGCTGTGAGGGGAACG
A_73_117003	0.00117804	7.28543e-05	up	3.01481	3.01481	1.59207		Rep: DNA replication complex GINS protein PSF2. - Bos Taurus, complete [TC430523]	TTACGCTCAGTTGAGACATTCTGTAATTCCTTATCTGTGTCTGGGAGCCAGCTGCCTTTT
A_73_P072811,A_73_P037366|522920	0.00193617	0.000203686	up	3.01079	3.01079	1.59014	ATAD2	ATPase family, AAA domain containing 2 [Source:HGNC Symbol;Acc:HGNC:30123] [ENSBTAT00000061524]///Bos taurus ATPase family, AAA domain containing 2 (ATAD2), mRNA [NM_001099020]	GTAATCAGCCAATGTATTTATCAGCATCGCAGGGACTATGACAAAACAGCACTCATTCAG///TTCTGACTCAGGAAATGCTGTCCACCCTGAGCCAACAGAATGATTAAAAGTTTTCCCAGC
A_73_P060536	0.000655957	1.17827e-05	up	3.0081	3.0081	1.58885		CR851842 Normalized and Subtracted bovine endometrium tissues (bcbp) Bos taurus cDNA clone bcbp0007.e.13 5', mRNA sequence [CR851842]	CTTTTTTCTAATAACCTCATGTAATTGGACCAAGGAAGAGTTGCTAGATGAATTCAGTGA
A_73_P076916,A_73_P466498,A_73_P076911|525628	0.00235297	0.000294486	up	3.00181	3.00181	1.58583	DIAPH3	Bos taurus diaphanous related formin 3 (DIAPH3), mRNA [NM_001192614]	GTTTCTAAAAACGAACCCATTCCTGAAGTTGAAGCCCTGCTGGCAAGATTACGAGCTTTA///CAGGCTTCACATCAGAAATGAATTTATGCGTTGTGGATTGAAAGAGATATTGCCAAATTT///GACTGAAGACTGTTTCTGGGTAAAAGCAAATGAAAATAAGTATGAAAGTGTGGATTTGCT
A_73_P051166|767819	0.00260585	0.000350871	up	2.9937	2.9937	1.58193	HASPIN	Bos taurus germ cell associated 2, haspin (GSG2), mRNA [NM_001076544]	ACAGAGAAGCAGAATTTATCCATGATTTTCAAAGGGAAAATAAATGTCTCCATGGCTACT
A_73_108220|515343	0.00132375	9.53163e-05	up	2.99351	2.99351	1.58184	NEIL3	Bos taurus nei like DNA glycosylase 3 (NEIL3), mRNA [NM_001034490]	TTTTCCAGTGGGCACAAAATGGGCCAGGAATAAACATTATTCCAGGTTGCTAATTTTCTA
A_73_P062821|104975684	0.00247301	0.000319244	up	2.99328	2.99328	1.58173	LOC104975684	u4g05ca.r1 cattle subcutaneous adipose tissue cDNA library Bos taurus cDNA clone u4g05ca 5', mRNA sequence [ES346562]	ACAAGGCCAAGGGCAAGTAAAGTGTTCACGTTCCCACGGCACTTTTACTTTCAGTTACCC
A_73_103878	0.000512795	2.85429e-06	up	2.99005	2.99005	1.58017		Rep: Membrane-bound O-acyltransferase domain-containing protein 1 (EC 2.3.-.-) (O-acyltransferase domain-containing protein 1). - Canis familiaris, partial (31%) [TC412699]	TGGCTCCTTTGGGAAACTTCTGCTAGGTGATATTCTATGTGGGAGAAGGAAATGTGGTAT
A_73_113369	0.000935152	4.31346e-05	up	2.97808	2.97808	1.57438		Rep: Predicted protein - Chlamydomonas reinhardtii, partial (6%) [TC426014]	ACCCCGCAGATTCTCCTGGTTCTAACCCAGGGGGTGTTTGCGTCACCCCCTTTTACTTGT
A_73_P248671,A_73_106202,A_73_P248516,A_73_P190092|282386	0.00224811	0.000272158	up	2.97661	2.97661	1.57367	TMSB4X	Bos taurus thymosin beta 4, X-linked (TMSB4X), mRNA [NM_001002885]	GTAAAAAGCTGGTCCAAGGTGTTCTGCGGACTGTAAAATGCAGTTTAATTGGAGTGCCAT///AAAGCTGGTCCAAGGTGTTCTGCGGGCTGTAAAATGCAGTTTAATCAGAGTGCCATTTTT///GCGGGCTGTAAAATGCAGTTTAATCAGAGTGCCATTTTCTTTTGTTGTTCAAATGATTTT///CTGTAATCCTATGTTACGCTATACTGAATACGCATCTTCACCCGCTCCATCTTTTTTCTT
A_73_110535,A_73_P123276,A_73_P375061|541054	0.0009208	4.17717e-05	up	2.97552	2.97552	1.57314	BTG3	Bos taurus BTG anti-proliferation factor 3 (BTG3), mRNA [NM_001034722]	CATGTTGAGCGAAGGTAGAATAAGCCTGACTACACATTAAAAGTTCATACTTAAAGTAGT///GGAAGAATAAACCATATCGCCCAGTTCCAGTAACATGGGTACTTCCTCCTGGAATGCATT///GTAGGAGTGGATGATCTAGCACCTTTGAGCATTTACTTTATGGAAAGTATGTAAGTTATT
A_73_119456,A_73_P387291,A_73_P343236,A_73_112061|616148	0.0100061	0.00268241	up	2.97051	2.97051	1.57071	LBH	Bos taurus limb bud and heart development (LBH), mRNA [NM_001099152]	GATGAACCTCCTGTAACTTCTATCTGTTCTTTTTTGAGGCTCAGGGAGAAACTAGCATTT///TATTATTTTTTGCTGGTCGCTAGATCCCTTTGTATGACCACATGGAGTCTGAGCAGGCCA///TGATCTGGAGGTTTTTTAAGAGGCTGCACTTTTGAGCGTTCCCCTGATTATCCTCTTTGC///AGGAGTTCTTGGTCCAGGAGGATGCGCAGGACAACTGTGAAGAGACAGCGAGTGAAAACA
A_73_106569,A_73_P105685|614970	0.00112048	6.6521e-05	up	2.96641	2.96641	1.56872	LOC614970	PREDICTED: Bos taurus histone cluster 1, H2 (LOC614970), mRNA [XM_003583895]///LB0131.CR_G07 GC_BGC-13 Bos taurus cDNA clone IMAGE:7986945, mRNA sequence [DT721576]	GGCAAGTAGAAGCCTGGCATTGCTTGGAACTCAAACCTGTTCAAACCAAAAGGCTCTTTT///TATATTTTATGTTGGTGAGTTTATACTCTCATCATGTCTGGTCGTGGCAAGCAAGGAGGC
A_73_P349741,A_73_108433|537667	0.00205115	0.000228721	up	2.96501	2.96501	1.56804	LYAR	Bos taurus Ly1 antibody reactive (LYAR), mRNA [NM_001031769]	CATAATGAATCTATCCTGGAGCAGGTGTGGAATATCTTTTCCGAAGCTTCCAGCAGTGAA///AACCCCACCCTGAAGTTGTTAAAGGACAAGGTCAAGCTTGTAAAATGAACATCTTTATAT
A_73_P108116,A_73_P210392,A_73_P043911|281203	0.000619708	7.96173e-06	up	2.95936	2.95936	1.56528	GNG2	Bos taurus G protein subunit gamma 2 (GNG2), mRNA [NM_174072]	TTTTTAGCAAAGTGGGCGCCTTTCTAGTCCACAGCATTTAAAGAGAGGGAGGAGAACCAT///TAGGGAGAAGAAGTTTTTCTGTGCTATCCTTTAAGTCTTCAGGAGGAACCTGAGGAGCCT///AGTATGAAAGCTGATCCACACCCCAAGTTAAGAGATCTGATGTCTGGAGAACTGCCTAGA
A_73_100558	0.000686005	1.67089e-05	up	2.95881	2.95881	1.56502		PREDICTED: Bos taurus lipase, endothelial (LIPG), mRNA [XM_586851]	CTCCTTTGGCTTGAGCATCGGCATTCAAATGCCCGGGGGTCACATCGACATCTACCCCAA
A_73_112246	0.00591222	0.00126768	up	2.95541	2.95541	1.56336		GB	CCATGCTAAGCGTGTCACCATCATGCCTAAGGATATTCAGCTGGCACGGCGAATTCGTGG
A_73_P038856,A_73_P319631,A_73_P084671|540643	0.000654701	1.10494e-05	up	2.95199	2.95199	1.56169	LMNB1	Bos taurus lamin B1 (LMNB1), mRNA [NM_001103295]	GGGAAGGGTTTCTCCTAAAACGCATTAGTTGTGTTTTTTAAGATAGTGTAACTTGCTTAA///TAAAGGGCGTTTTATGTTTGATTGATTCGCGGTCCTCCCCCTTTGCCCTTTGTGTTGTAA///ACATCAGTGAGTTACAAATATACCTCAAGATATGTGCTGAAGGCAGGCCAGACTGTTACA
A_73_P212107,A_73_P063896,A_73_105157,A_73_P354726|506809	0.000952655	4.52109e-05	up	2.9465	2.9465	1.559	GATA2	Bos taurus GATA binding protein 2 (GATA2), mRNA [NM_001192114]	AGTCAATTGTACGTGGCCACAAGAGCCCTTGCTGTGGAACAAAGAAAACCTACAAACCAA///AGATGTCCAGCAAGTCCAAGAAGAGCAAGAAGGGGTCCGAGTGCTTCGAGGAGCTGTCCA///GTCTGTAAAAACTGTATGCTCTCTTCCTACTCCTTCAAAGTGAATACTGTTAAGAATAAT///ACGAGGTGGACGTCTTCTTCAACCACCTCGACTCGCAGGGCAACCCCTACTACGCCAACC
A_73_P077361	0.00194795	0.000206097	up	2.94423	2.94423	1.55789			TGATGAAACCTACTGCATTGAGAACGAGGCCCTTTACAACATATGTTTCCACACCCTCAG
A_73_P079071,A_73_P102501|282856	0.000838235	3.12632e-05	up	2.94196	2.94196	1.55678	PCK2	Bos taurus phosphoenolpyruvate carboxykinase 2, mitochondrial (PCK2), mRNA [NM_001205594]///Rep: Phosphoenolpyruvate carboxykinase - Bos Taurus, complete [TC425177]	TAGGCTTGCAGAAACTATGAGCAACTTAACAACACTCTCATCCTCTGGGTGCTATGGGAT///CAGGCCCCAGAGCTTTCCCCACATGCTGCCTAATAATGAAATGCTCATTTATATAAAAAA
A_73_P330976,A_73_103057|616799	0.0138991	0.00418677	up	2.94154	2.94154	1.55657	GINS4	Bos taurus GINS complex subunit 4 (GINS4), mRNA [NM_001082460]	TAACTGAGAAATGAGGCCATGGGACCTTAGAAGACACATTTTTGGAAACCCTGCATGCCA///CTTCATTTTCTCCAGAGCATTCTCACCCTTCTCAGCCATTCATTGAAAAACGTTCAGTGA
A_73_117645	0.0369106	0.0147995	up	2.93412	2.93412	1.55293		CR455524 Normalized and Subtracted bovine embryonic and extraembryonic tissues (bcaz [CR455524]	GTCACCAGGGATCCAGAACCACCATCAATTGTGAAGTTTGCTCTATCTAGAACAGTTTAA
A_73_P249841	0.00117807	7.29063e-05	up	2.92746	2.92746	1.54965		Rep: Endonuclease/reverse transcriptase - Sus scrofa (Pig), partial (6%) [TC432766]	TGCTCTGGTTCTCTCCACCTTGTTTTACTTAGACTCTGGTTCAATAAATATGAGCTGATT
A_73_P180392,A_73_P039506|781721	0.00145463	0.000115923	up	2.92562	2.92562	1.54874	C16H1orf21	Bos taurus chromosome 16 open reading frame, human C1orf21 (C16H1orf21), mRNA [NM_001081547]	TATTTTCTAAAAGACGAGGTAGTGGTGAACTCAGATATCCAACTTCTGTTCTAGACTGGT///GCTCAGATGCAGACGGAAGTGTGATCACAATCATTTTGAATCCCTCTTGCCCACTTTTTT
A_73_114382|614434	0.000655957	1.32903e-05	up	2.92301	2.92301	1.54746	CDCA3	Bos taurus cell division cycle associated 3 (CDCA3), mRNA [NM_001035449]	CCTAAACTGCCAACCCTGGGACTCAGAGCTTTGTTGGTTTTCTTTGTGTCTGATGTACTT
A_73_108609,A_73_P147861|540500	0.000512795	2.9911e-06	up	2.92094	2.92094	1.54643	GALNT14	Bos taurus polypeptide N-acetylgalactosaminyltransferase 14 (GALNT14), mRNA [NM_001192732]	GACACCTTCAACTACATTGAGTCAGCCTCAGAGCTCAGAAGGGGGGTTTGACTGGAGCCT///CAGGACTCCAGTGAAAGATGAAGAGTGGAGGTTGTTTTCAAAACAAATAAAGAACCTTAA
A_73_P128631,A_73_108556|506604	0.000609441	7.37284e-06	up	2.92062	2.92062	1.54627	ISG20	interferon stimulated exonuclease gene 20 [Source:HGNC Symbol;Acc:HGNC:6130] [ENSBTAT00000065058]///interferon stimulated exonuclease gene 20 [Source:HGNC Symbol;Acc:HGNC:6130] [ENSBTAT00000019639]	AGCACGACTTCAAGGCGCTGAAGGAGAACATGAGCGACTACGCCATCTATGACACGGCTG///TCTTCAGAACAAAAACTTTGTTGCTTTTGTAAAATGCATTTTTAGCAGTAAAATAGCTCT
A_73_P299331,A_73_114269,A_73_P452391,A_73_P168812|529062	0.000972805	4.85736e-05	up	2.91786	2.91786	1.54491	ANKRD28	Bos taurus ankyrin repeat domain 28 (ANKRD28), mRNA [NM_001205960]	GTGACTGCTTGAATACTGTATTTACTTGCACTCTTTCAGTACATCAAGATTCCTGTATAT///ATGATGCCTATCTCGTCAAGTAGCCCTTTATCATCCCTGACGTTCAATGCCATTAACCGT///TGCAGCATTTAAGGGCCATGTAGAATGTGTGGATGTTCTCATTAATCAGGGAGCCTCAAT///AGCAAATAACCTCCTTTAACAAGACAAACAGTACCGTTTAGTTCAGGAGCTAAGTATAGC
A_73_P411486,A_73_P085696|782605	0.00298426	0.000438622	up	2.91761	2.91761	1.54478	ELL2	Bos taurus elongation factor, RNA polymerase II, 2 (ELL2), mRNA [NM_001191146]	GAATATCTCACCTGACAAATAGAGTGCCGCCAACATTAAACGGCCATTTGAATCCCACCA///GGCACTAGAGCTCTGCTTGGACCAGAAGATGTGAATAAACTTAAGCTTATTTATTTAAAA
A_73_112719|506946	0.000655957	1.15914e-05	up	2.91637	2.91637	1.54417	DTYMK	Bos taurus deoxythymidylate kinase (DTYMK), mRNA [NM_001098893]	TCCAGAGGTCCTATCGGGGCTGCTGAAACCCTCAGCGTGTCCGCAGGCATCATCAATAAA
A_73_117943,A_73_P172352|509117	0.000468303	5.66319e-07	up	2.91625	2.91625	1.54411	SPC24	Bos taurus SPC24, NDC80 kinetochore complex component (SPC24), mRNA [NM_001075391]	CACTCAGTGGGAATCAGCCGTGGTGGGTGGTCAGTGCCTTGGTGGTGAGATGAGCTTAAA///GATCTCGAAAGACAAGAGAAGGAAGTTGATGAGGACACGACAGTCACCATCCCTTCAGCT
A_73_P042981,A_73_P335251,A_73_P287811|100125276	0.000509628	1.45406e-06	up	2.91549	2.91549	1.54374	GNG4	Bos taurus G protein subunit gamma 4 (GNG4), mRNA [NM_001103324]	ACTTGTGGTTTGTGCCCTTTTCTGTATGTATGTTGTACTTCAATAAAAAGTGTGCTTAGC///TTACATCAAGTGAGAAACCCGGCAAAGCTGTTCGCAAGTAGTTATGTAAGTTACTCTTAG///TGCGTGACTTCAAAGATCCATGGTTCAGTTGGAAGAATCATATAAAATCACCCGCAAAAA
A_73_120869|518768	0.000667089	1.4753e-05	up	2.91222	2.91222	1.54212	POM121C	Rep: PREDICTED: nuclear pore membrane protein 121 isoform 3 - Macaca mulatta, partial (30%) [TC415327]	CCAGCCAGACCACGTCCTTTGCCTTCAGTGTGACCAGCACGCCGGACAGCAAACCTGTGT
A_73_114064|522347	0.0396426	0.0162234	up	2.91063	2.91063	1.54133	MASP1	Bos taurus mannan binding lectin serine peptidase 1 (MASP1), mRNA [NM_001076968]	TTCACTCCTCTGTAAGGTTCCTCTGAGCTGTTTCCTCCATCAGGGAACCAAAATGGAAAT
A_73_P043981|515080	0.0010692	6.08331e-05	up	2.90848	2.90848	1.54026	FBXO5	Bos taurus F-box protein 5 (FBXO5), mRNA [NM_001082435]	CGACGGTTATGATTGCTTATTACATCAATTGAGATCGATCATGAAGGCTAGTTAGAAAAA
A_73_111142	0.03862	0.0156884	up	2.90831	2.90831	1.54018		Rep: Crossover junction endonuclease EME1 (EC 3.1.22.-) (hMMS4). - Bos Taurus, complete [TC393320]	ATTATGTCAGAGCTGTCACAGACAATGTGGCTTTGCAAGGATCCACCTTGTTTATTGGCA
A_73_101654,A_73_P108296|282653	0.000609441	7.58827e-06	up	2.90686	2.90686	1.53946	AQP1	Bos taurus aquaporin 1 (Colton blood group) (AQP1), mRNA [NM_174702]	TCTGCTCTGCATATATGCCTCTTTGGAATTGGAATTTCATTATATGTTAAGAAAATAAAC///GAGGAGTATGACCTGGATGCCGACGACATCAACTCCAGGGTGGAGATGAAGCCCAAATAA
A_73_P466793	0.0467873	0.0198841	up	2.89922	2.89922	1.53566		PAS domain containing serine/threonine kinase [Source:HGNC Symbol;Acc:HGNC:17270] [ENSBTAT00000001044]	TTCAGGGACTGGACAGACCGAACTTCTTCCAACTGTTCGTGTGCCACGTCTGAACTCGGG
A_73_109494,A_73_P191402|538437	0.000655957	1.24462e-05	up	2.89909	2.89909	1.5356	GEM	Bos taurus GTP binding protein overexpressed in skeletal muscle (GEM), transcript variant 1, mRNA [NM_001083732]	AAACACAAAACATAAATACTTCCAGCATTTTGGGTTGACCGTTGTATGCCGCAGCTCTGC///TATGAACCAACACTGATGGTTGATGGGGAAATTGCAACAATTATCCTCCTGGACATGTGG
A_73_P389491,A_73_P227087,A_73_P045446|515310	0.000955479	4.65449e-05	up	2.89808	2.89808	1.5351	DUSP6	Bos taurus dual specificity phosphatase 6 (DUSP6), mRNA [NM_001046195]	AATCTCTTTGAGAATGCAGGAGAGTTCAAATACAAGCAGATCCCCATCTCGGATCACTGG///ATTCACCCTAGAGGAACAAAACTGTCTGGGCAGCTTCATTCAGAGAGATTCATTGACACC///TCAATTTTGCATATAGAGGAGCCAAAGAGAGGTTTCAGCTCTGTATTTGTAGTATCAGTT
A_73_P361531,A_73_101596|533161	0.00124359	8.23508e-05	up	2.8946	2.8946	1.53336	KIF2C	Bos taurus kinesin family member 2C (KIF2C), mRNA [NM_001101147]	AATAAGCAGCAAGAAACGGCCCCAGTGACGACTGCAAATAAAGATCTATTTGGTGTCATA///TAGTTCAGCTCTGCTGGCTCTGGCCTGCCTTCCACACCCTTGGTCCGGCCACTAATATAT
A_73_100864	0.000910549	4.04057e-05	up	2.89321	2.89321	1.53267		PREDICTED: Bos taurus transcription factor SOX-9-like (LOC100336535), miscRNA [XR_083993]	GAGCAGGGTCAGCCCACTGACAAACTTTAATTCCTAATTACTTCTGTGGCTGGAGAGTTT
A_73_P039921,A_73_P419311,A_73_118793,A_73_P430131,A_73_P072841|504367	0.000745537	2.35215e-05	up	2.8901	2.8901	1.53112	MCM4	Bos taurus minichromosome maintenance complex component 4 (MCM4), mRNA [NM_001075158]	TGAAGATATTCGGGGACAGTCTGACATAGCAATCACCAAGGACATGTTTGAAGAAGCGCT///CCATGTTAACTTGTATTGCTTTGCTCTAATGTGTAAAGCTTCTTCCTCAATAAGTGATAG///ACAATGGGGTTCCATGTTAACTTGTATTGCTTTGCTCTAATGTGTAAAGCTTCTTCCTCA///CTAATGTGTAAAGCTTCTTCCTCAATAAGTGATAGAGTAAGTAATACTTGGTTATCTGGC///ATTGAAAACATCCAGCTGCCCCACACGCTCTTATCAAGGTTTGACTTGATCTTCCTCATG
A_73_120950,A_73_P269256|525741	0.00288849	0.000416961	up	2.888	2.888	1.53007	CAMKV	Bos taurus CaM kinase like vesicle associated (CAMKV), mRNA [NM_001075876]	TGTGGGTCTGCTCTGGTGTATGAAGGTCGGTGGGCTGTGTACCTGCTGAACCTGGCAAAT///AAATCCTGGCTGGTGATTATGAGTTTGACTCTCCATACTGGGATGACATTTCACAGGCAG
A_73_P062261|107131316	0.00894879	0.00227966	up	2.88619	2.88619	1.52917	LY6G6D	lymphocyte antigen 6 family member G6D [Source:HGNC Symbol;Acc:HGNC:13935] [ENSBTAT00000053636]	AGACGTAACTTATACGACCCACAGGGACTGCTGCGTTGGCGACCTGTGCAACAGTGCTGT
A_73_116123	0.00158717	0.0001376	up	2.88599	2.88599	1.52907		PREDICTED: Bos taurus histone H2A type 1-A-like (LOC521825), miscRNA [XR_084054]	TGCAGTTAGCTATCCGTAATGAAGAGGAGCTCAACAAGCTGCTGGGCGGTGTGCCCATCG
A_73_P129216	0.000783216	2.69756e-05	up	2.88352	2.88352	1.52783		Rep: Rogdi protein - Xenopus tropicalis (Western clawed frog) (Silurana tropicalis), partial (5%) [TC429980]	GGTTTCTTAAGGCATCAGCCACCCATTTCCTTGTATGAATCTGTAATAAACCTTTCTCTG
A_73_P079376|101904911	0.0424832	0.0176943	up	2.87846	2.87846	1.5253	LOC101904911	Rep: Olfactory receptor MOR223-6 - Mus musculus (Mouse), partial (96%) [TC399347]	AGTTGCTTCATGTTAATTCTGCTCTCCTATGCCAACATAGTCCACGCCATCCTGCAGATT
A_73_P451601	0.0470763	0.0200302	up	2.86391	2.86391	1.51798		PPFIA binding protein 2 [Source:HGNC Symbol;Acc:HGNC:9250] [ENSBTAT00000021483]	TGAAACGTATCAGGAACGCTTAGCACGCCTAGAAGGAGATAAGGAGTCCCTCATATTACA
A_73_P050176,A_73_P346321|617577	0.0163533	0.00519054	up	2.86275	2.86275	1.5174	MPIG6B	Bos taurus megakaryocyte and platelet inhibitory receptor G6b (MPIG6B), mRNA [NM_001078081]	CACTGCTAAGCCTCGGTAAATGAATGAAAATGAATGTCCCTGGAAATGTCATTTCCTCCT///TTTATCTGCAAGGGTCGCCAAGAGGAGGAGAGCCGTACGGAACTTCATGTGCTGGGAGAC
A_73_P497543,A_73_114809,A_73_P259286|513592	0.000468303	2.94046e-07	up	2.856	2.856	1.514	KPNA2	Bos taurus karyopherin subunit alpha 2 (KPNA2), mRNA [NM_001034449]	CCAAATGAACGGATTGAAATGGTTGTGAAAACTGGTGTTGTACCCCAACTTGTGAAGCTT///AACAGTTCCAAACTGTACATACTGTATGAAGCTTCTCCTCTCAATGGGTTTCTTGTTTCT///CAGATTCTTCCTACTTTAGTTCGTCTCCTGCATCACGATGATCCAAAAATATAAGCTGAT
A_73_P087296	0.00114682	6.97016e-05	up	2.85354	2.85354	1.51275		centromere protein E [Source:HGNC Symbol;Acc:HGNC:1856] [ENSBTAT00000011898]	TTTGATAACTCAGGTTTAGGCCTTTGTCCAGAAGAACAAACTGCTGAAGTGGAGACCGAG
A_73_P102586,A_73_P377856,A_73_P298996,A_73_108229|514386	0.00065224	1.08884e-05	up	2.85075	2.85075	1.51134	BIRC3	Bos taurus baculoviral IAP repeat containing 3 (BIRC3), mRNA [NM_001035293]	CTAAGAAAATGCCCTATTTGTAGAGGTACAATCAAGGGTACAGTTCGTACATTTCTTTAT///ACTTAATACAATTTAAAGGACAAGAGTTCATTAGTCGAGTTCAAGCCAAGTTACCCTCAT///CTGCCAGGGTGATTAGTGAACAAGAACATGATGTTATTAAACAGAAAACACAAACATCTT///ATCAGGAACACAAATTCCTTTGCTTTTTCCATCAGTGTCCTATACATAGAAGGTCTTGAT
A_73_100296|540933	0.000609441	6.30317e-06	up	2.84915	2.84915	1.51053	HELLS	helicase, lymphoid-specific [Source:HGNC Symbol;Acc:HGNC:4861] [ENSBTAT00000007848]	TTGGAGCTAAAAGAATGTCTTCAAAAAGTTCTTGTTCACATCTAGTGATCTGTATTGGTG
A_73_P061371	0.000655957	1.33812e-05	up	2.84077	2.84077	1.50628		Rep: Uncharacterized protein INCENP - Homo sapiens (Human), partial (25%) [TC433901]	AATCTTTCAGAAGAGCAAGCCCCGCTACCATAAGCGCACCAGCTCCGCAGTGTGGAACTC
A_73_P275101,A_73_104859|615937	0.00141833	0.000110278	up	2.8402	2.8402	1.50599	RAD51AP1	Bos taurus RAD51 associated protein 1 (RAD51AP1), mRNA [NM_001076403]	ACTCTGATTTTAGTGGGAGTGAAGATGATGAAAGCTTCACTGTGAGAAGAAGTAAAGTTA///CCTGTCCCGCTTAGCACGGGTTAAACCTCTGCATCCAAATGCCACCAGTAGCTGCGTGTA
A_73_P453251,A_73_114880,A_73_P463406,A_73_P266676,A_73_P376846|511056	0.000700634	1.90669e-05	up	2.83963	2.83963	1.5057	HAUS8	Bos taurus HAUS augmin like complex subunit 8 (HAUS8), mRNA [NM_001075487]	CACTTTACGGCACTTAGCCTAGGCCGTATAGTTAATTTTGTGTGATAATCTCATTTGATA///CTAGCCGTATAGTTAATTTTGTGTGATAATCTCATTTGATAATTTAACAAATAAAAACTG///AGTCTACCTTGCTGGAGGGGCATGACACTGCCTTGTCTGACCTGGATCTCTCAGCCATTC///AAACTCCAGAAAAAGGCTTATGAGTTGAAGCGCAGGCTTCTCCTCTGTCAGAAGAAGAAG///GGCCAAGGACACTGGGTTTCTTTCCCGTTTTTGACACTTATGAATAAAGTCACCTTAAAC
A_73_111787,A_73_103831,A_73_P046536|281874	0.0104734	0.00286906	up	2.83629	2.83629	1.504	ITGAL	integrin alpha-L precursor [Source:RefSeq peptide;Acc:NP_937864] [ENSBTAT00000045080]///Bos taurus integrin subunit alpha L (ITGAL), mRNA [NM_198221]	CTCAAAGATGGAAACTATGTCCAGTGACTTGGCTCCCAGTGTCAACGACAATGCTTGTAT///AGGAGAAGATGGAGGCGAACGTAGATGCTTCCAGTGAAATCCCTGGAGAAGATGCTGGGC///CTGTTGTTGCTGTTCCTGATTTTCATAGCTCTGTACAAGGTTGGTTTCTTCAAACGGAAC
A_73_112550|520341	0.0036052	0.000594098	up	2.83525	2.83525	1.50348	TNFRSF9	Bos taurus TNF receptor superfamily member 9 (TNFRSF9), mRNA [NM_001035336]	TCCACTGTCAGGAGAAAGAATGATGACAATCATCATCATGGCCCAAGTTTGGGGTCAAGA
A_73_105843|353120	0.0060084	0.00130019	up	2.83358	2.83358	1.50263	BRCA1	Bos taurus BRCA1, DNA repair associated (BRCA1), mRNA [NM_178573]	ATCTGTTGCTATGGACCTTTTACCAATATGCCCACAGATCAACTAGAGTGGATGGTGCAG
A_73_P259246,A_73_112169|510916	0.00591464	0.00126999	up	2.83279	2.83279	1.50222	DBF4	DBF4 zinc finger [Source:HGNC Symbol;Acc:HGNC:17364] [ENSBTAT00000019578]	TGTATTTACTCAAGAAGTCAAGCACTTCTGCAAGAGATGTGGGGAAGAGAGTAGGTGTTG///CATCTCAATGGAAACAAAAGTTAGATACTGTGCTTTTTCCAGCAAAGCATCTGAAAGAAA
A_73_P170382	0.016662	0.00532276	up	2.83106	2.83106	1.50134		AV615142 Bos taurus adipocyte cell line Bos taurus cDNA clone E1AD009G04 3', mRNA sequence [AV615142]	AGGCCTGTCAGATAGTGTGACTTTTCATCTTGGGCCAATAAATAACTGTTGGACGAATGC
A_73_P464446,A_73_117930|614212	0.00117894	7.31944e-05	up	2.82818	2.82818	1.49988	LMO4	Bos taurus LIM domain only 4 (LMO4), mRNA [NM_001034751]	TCGGCACGTCCTGTTACACCAAGAGCGGCATGATCCTTTGCAGAAACGACTACATTAGGT///TCAGGCTCATAGCAGCTACTGTGTAGAAATTCCCCCCTACTTCTAATTTGCTGAATGAAG
A_73_102004,A_73_P066071|511170	0.00212493	0.000242197	up	2.82449	2.82449	1.49799	KIF18B	Bos taurus kinesin family member 18B (KIF18B), mRNA [NM_001192283]	TGCCATCATTCCCCCTCGTTTATAATGCCGTCCAGGCAGGAAGCTAGCTATGGGGGGCTT///TTGCAAAACTGGGCTTCCACGAATGCATTGGCTGGGACAGTGTGCCCCAGGAGCTGAACA
A_73_111423|513642	0.00248623	0.00032237	up	2.81395	2.81395	1.4926	RHNO1	Bos taurus RAD9-HUS1-RAD1 interacting nuclear orphan 1 (RHNO1), mRNA [NM_001075631]	TTGTTTCCAGTTGAAATAACCTGCAAATATTAACTAGGGTGGGAAAATGATTTCTTGTCC
A_73_P053146	0.0221105	0.00768683	up	2.81077	2.81077	1.49097		GB	ATACAATAAAGAAACCACCTCCTTCCACTTGGAGAAAGCCTCAGTCCAAGAGTCAGACTC
A_73_106382	0.00158796	0.000137728	up	2.80722	2.80722	1.48914		Rep: Uncharacterized protein INCENP - Homo sapiens (Human), partial (25%) [TC433901]	ACAGCACTCTGTAAATAGATTGTTAGAGTTCAGCTGAATTTTAGCCTCTAGTGTTTGAAA
A_73_P280126,A_73_116188,A_73_P052471|509921	0.00199521	0.000217395	up	2.80486	2.80486	1.48793	SKA3	Bos taurus spindle and kinetochore associated complex subunit 3 (SKA3), mRNA [NM_001110067]	TTTGGACTTAAAAATGTGAAAACTAACAGGAACTAAAAGAATACCTGCAGCTTGGGGGTC///TGGAAATTTAAACATTACTGTTTGCCACTCAAATGAGGCCACCTTCAGTCTTCTCGGGGC///ATCCTTCCATTATGGAAACTGAACAGAATGAGATGAACGCAAGCCTGGTCTCACTTTGTT
A_73_120079|615932	0.0242592	0.0086702	up	2.80306	2.80306	1.487	CCNB1IP1	Bos taurus cyclin B1 interacting protein 1 (CCNB1IP1), mRNA [NM_001046565]	AACAGTTTTTTCAGTTTTGCCTCCCCAAATAATGAATTAGAGCAGCAGCCAGTCTCTAGC
A_73_113043	0.001019	5.51851e-05	up	2.79589	2.79589	1.48331		Rep: Beta-2-microglobulin precursor - Bos taurus (Bovine), partial (31%) [TC455884]	CTCTTGCATTGCTTAGTTGCCTGTGTGTCAAAATACCTTGTGGACGTTGAAAACTATTTG
A_73_120116,A_73_P457976,A_73_P270066,A_73_P308141|510743	0.000924147	4.23018e-05	up	2.79332	2.79332	1.48198	ARHGAP18	Bos taurus Rho GTPase activating protein 18 (ARHGAP18), mRNA [NM_001110772]	TTTTAATTAAGAGCAGCCTGTGGATATGATCACTTAAATACCTTTGTGATGATTTGTGCC///CAAAACAAGAGATTCTGGCCTTTTTTGTGTCCCATTGCAGTATTGGTAGAACAAGATCAG///CCTGTCAGAAACTGCCAATTCTTACTGCACTGTTTAAGACTTACGTATTCAGAATAAATA///CACACTGAGCCTTAAAAAGTTCTAGATTTGTGCTGCTGCCAGATTATGTGAATTATTATT
A_73_100504	0.00426028	0.00077274	up	2.78799	2.78799	1.47922		Rep: Chromosome undetermined scaffold_140, whole genome shotgun sequence - Paramecium tetraurelia, partial (6%) [TC425668]	GAAACATCTGGGCTTTATTCTTCAAGCGTTGGAGGTTGATGTGTCCTGTCAAGGGGTAAA
A_73_108581,A_73_P384886|515029	0.000916889	4.14547e-05	up	2.78451	2.78451	1.47742	UPP1	Bos taurus uridine phosphorylase 1 (UPP1), mRNA [NM_001098976]	CAGCGGCTAGTAGGCCAATTCATCAAGAAGCGCCTGATGCAGGCCTGATCCCCCAACATT///ATGGGCGTCCCCTCCATCGCTATCATGCTGCATGAGCTCATCAAGCTGCTGTACCATGCT
A_73_P086771|540823	0.00158856	0.000137962	up	2.7842	2.7842	1.47726	ZNF367	Bos taurus zinc finger protein 367 (ZNF367), mRNA [NM_001206033]	TTCATTGGAAGCAGTTCTCACAGAAAGCACTTTCTGAATAAGACACTTGTATGGGGGAAA
A_73_115189,A_73_P110176|526704	0.00276158	0.000385103	up	2.78385	2.78385	1.47708	VNN1	Bos taurus vanin 1 (VNN1), mRNA [NM_001024556]	TGCTGAATGGGAAGGCGGAAAGAAAAAACAGCAGAGGAAAACCACGAGGATTCTTCATAA///TGCTGAATGGGAAGGCAGAAAGAAAAAAGCAGCAGAGGAAAACCATGAGGATTCTTCATA
A_73_P073961|529876	0.00203255	0.000224867	up	2.78034	2.78034	1.47526	WDR37	Bos taurus WD repeat domain 37 (WDR37), mRNA [NM_001205968]	AATTCCATAAAATTTCATCCATCAGAACAGTTGGCCCTCACCGCCTCTGGAGATCAGACT
A_73_P046726,A_73_115786|281990	0.00199313	0.000216426	up	2.77982	2.77982	1.47499	POLD1	Bos taurus DNA polymerase delta 1, catalytic subunit (POLD1), mRNA [NM_174427]	TGTGTAATCGCATTGACATCTCGCAGCTGGTCATTACCAAGGAGCTGACTCGCGCTGCCG///CAGCCTGCACGAGGACGTCATCTGCACCAGCCGGGACTGTCCCATCTTCTACATGCGCAA
A_73_120639|507390	0.00080199	2.84463e-05	up	2.77827	2.77827	1.47419	BCL2L11	Bos taurus BCL2 like 11 (BCL2L11), mRNA [NM_001075310]	CATGTGGCCGATTTTCCAACGGAAGCTTGATGTGAATGTAAATGAGGGAGGGATTCTCTT
A_73_119943	0.000879957	3.74847e-05	up	2.77801	2.77801	1.47405		Rep: Retinoblastoma-like protein 1 (107 kDa retinoblastoma-associated protein) (PRB1) (P107). - Canis familiaris, partial (10%) [TC450212]	TTTTTTGTGTAGTATCTACACATGTTACAAGCCAAATACCATCAAGTCTGTCTTGAATCC
A_73_106300|100139053	0.00178925	0.000173404	up	2.77735	2.77735	1.47371	LIN54	Bos taurus lin-54 DREAM MuvB core complex component (LIN54), mRNA [NM_001205481]	GCGATGCTTAATGAGTGTCATCAACTCTGCAGGAAAAGCAAAAAGTGACCCTTGTGCCAT
A_73_115461,A_73_P145901|614159	0.00953343	0.00250708	up	2.77668	2.77668	1.47336	C24H18orf54	chromosome 18 open reading frame 54 [Source:HGNC Symbol;Acc:HGNC:13796] [ENSBTAT00000010737]///Bos taurus chromosome 24 open reading frame, human C18orf54 (C24H18orf54), mRNA [NM_001206167]	TTTTCACATCGCTTAAACTGACAGTTAACTATAAGCCATACGTTATTCTGTGATTGGTTC///TTATCTCGCCTGAGAGACCTGGTTGATGATACCAGTGGGAAACAGTCACCGAAAATATGA
A_73_P061176	0.0022059	0.000262851	up	2.77607	2.77607	1.47304		Histone H4 [Source:UniProtKB/Swiss-Prot;Acc:P62803] [ENSBTAT00000056505]	TCTGGTCTTATCTACGAAGAGACTCGTGGGGTGCTCAAAGTGTTTCTGGAAAATGTGATC
A_73_P446936,A_73_P089751,A_73_P106231|516644	0.000709557	2.01237e-05	up	2.77577	2.77577	1.47289	NCAPG2	Bos taurus non-SMC condensin II complex subunit G2 (NCAPG2), mRNA [NM_001192449]	TTTACAAGCTATACAAGCCCATCCTTTGGAGAGGATTAAAGGCCAGAAACTCGGAAGTCC///ATGTATCATATTGCTTGCAGACTCTGAGTAATAAAGTGGTGGCAACACCTGTTTGTGTAC///AAAGTTAAGGCTGTGAGGGCTGCTAAGTTTTGGAAAATATGCCCCATGGAGCACATTCTG
A_73_104593,A_73_P328146|538691	0.0156575	0.00489857	up	2.77479	2.77479	1.47238	HS3ST1	Bos taurus heparan sulfate-glucosamine 3-sulfotransferase 1 (HS3ST1), mRNA [NM_001076122]	GGCATTTTGTATTGTTTTTCATGGTTGTTAACATGTGTAATATGTCTCTATATGAAGGAA///AGGCGCGGCTCAGTAATCAGAAGCCTGCAATACCCATGTGTCACTGATCTGGAGACGTCC
A_73_121098,A_73_113467|541070	0.00119265	7.47765e-05	up	2.77117	2.77117	1.47049	MYLIP	Bos taurus myosin regulatory light chain interacting protein (MYLIP), mRNA [NM_001102253]	CTTTCCATATTGCCTTAATGTAGCAGTAATGTGTTTATGCATTTGTTTCTTTGCACAGAC///TCAACCTGGGCAAGAAGTATGTCTTCGATATTAAAAGAACCTCCAAGGAGGCGTATGACC
A_73_P328376,A_73_111771,A_73_P461831,A_73_P096566|504746	0.00141136	0.000109063	up	2.77001	2.77001	1.46989	ECT2	Bos taurus epithelial cell transforming 2 (ECT2), mRNA [NM_001097573]	GATTGCATTTTAAGTTTCCTGGGTTTTTCGGATGAAGAGAAAACCAATATGGAAGAAATG///TACCACTTTAATAGTGAATGATCCTTTATTGCCATATTTTAAAAGCAGTTGTAGTAGGAA///TTCTCACCGAAGTTTAGTTCAGCGAGTTGAAACAATTTCTCTAGGTGAGCACCCCTGTGA///CCTGCCTTCTTTGAAAGGAGAAGCCATACTTTAAGTAGATCTACAACTCATTTGATATGA
A_73_P418956,A_73_P262266,A_73_120153|515845	0.00102679	5.61079e-05	up	2.76477	2.76477	1.46716	FANCD2	Bos taurus Fanconi anemia, complementation group D2 (FANCD2), mRNA [NM_001192429]	ACTTTGTGAAAGATGGGAGTACACGGACTTCGCAGGAATCACACCAAAAATTGGGTTCTC///CTTCAGTATCCTCATCAACCTTGATAAAGGTGTTTGATAGTCGTCCTGGTCTGTTTGCGT///AGTCATGATTCTAGGCTTTGGGAGCTGGTTTTGAAACTCTGGATTTATTCTACAATTTAA
A_73_P169862	0.00220085	0.000260742	up	2.76232	2.76232	1.46588			CCATGAGCATGAAGTCTGTTTAAATTTCTTTCATTGGTGTCTGATAGTTTTTAGTGTTGG
A_73_105924,A_73_P109016,A_73_P109011,A_73_P103351|281375	0.000609441	6.2586e-06	up	2.76222	2.76222	1.46583	SERPINE1	Bos taurus serpin family E member 1 (SERPINE1), mRNA [NM_174137]	ACTCAGTACCCCCACGTGTGGGGTCCATGGCTCTTGAAATTGCTTTTTCACTTTTGATAT///TGTGGGGTCCATGGCTCTTGAAATTGCTTTTTCACTTTTGATATAGAAGCAAGTAAAAAA///ATCGTCAACGACTGGGTGAAAAGACACACAAAAGGCATGATCAGCGACTTACTTGGTGAA///GAGATGTCCAAGAGGAAGAAAGTCCGGAGCAAAGAATTTTTATTAATTCATTTTTCTGGA
A_73_P072451|535008	0.0148234	0.00455601	up	2.75718	2.75718	1.46319	BATF3	Bos taurus basic leucine zipper ATF-like transcription factor 3 (BATF3), mRNA [NM_001193235]	TGCGTGCTGCAGCTAAGACCCAGCTCGGCCAAACACATAAATAAAAATATTAAAAAAGGC
A_73_105264	0.00259731	0.000348926	up	2.75296	2.75296	1.46099		Rep: minichromosome maintenance deficient 8 - Rattus norvegicus, partial (11%) [TC481596]	ATGGGCTGTGCATATCAAATGTCCATCTGGGTAAACAGTCACAGGGTTACATTTAAATAT
A_73_P182072	0.0275327	0.0102111	up	2.75034	2.75034	1.45961		LB0046.CR_B13 GC_BGC-04 Bos taurus cDNA clone IMAGE:8029455, mRNA sequence [DT830227]	AAGAAAAACAGTGTGAGTTCGGAGGCATATTCTACGACAATCAGCAGAAAAGCCGGCGTA
A_73_102219	0.0259926	0.00950404	up	2.74376	2.74376	1.45616		PREDICTED: Bos taurus kinesin family member 25 (KIF25), mRNA [XM_015464911]	TCGGAGGTGATGCAAAGTTACAGGTGATCGTGTGCGTGTCCCCAGGCCAGAGGCACGTGG
A_73_100372	0.0015158	0.000124605	up	2.73648	2.73648	1.45232		Rep: Cell division protein kinase 2 - Bos taurus (Bovine), complete [TC466205]	TTATATTTCAGTTTATAGTAGTTTTTTAAGTGGGAATGGGTGGGGATTTGTTGCCATGTG
A_73_105570|524236	0.0011587	7.08642e-05	up	2.73612	2.73612	1.45213	LOC524236	PREDICTED: Bos taurus histone H2A type 1 (LOC524236), mRNA [XM_005197411]	AGGGTGGCAAGGCTCGCGCTAAAGCCAAGACTCGCTCTTCACGTGCTGGGCTCCAGTTTC
A_73_P097671|100196898	0.00256473	0.000340516	up	2.73216	2.73216	1.45004	LOC100196898		TTGAAGTACCTACAGCAGTCAGAGTGTTATGTCTCTGCTTCGGAGGGAACGTCAAGAAAA
A_73_P066301	0.00884929	0.00224735	up	2.72965	2.72965	1.44872		PREDICTED: Bos taurus notum pectinacetylesterase homolog (Drosophila) (NOTUM), mRNA [XM_604035]	TTTGGCTACAAAGTCTACCCAACTCTGCGCTGCCCGGTGTTCGTGGTGCAGTGGCTGTTT
A_73_P382521,A_73_103443|504652	0.0025615	0.000339832	up	2.72751	2.72751	1.44759	TK1	Bos taurus thymidine kinase 1 (TK1), mRNA [NM_001097572]	ATCGGAGGAGCAGACAAGTACCACTCCGTGTGCCGCCTATGCTAATTCAAGAAGGCCTCG///GCTTGTCTTCTAAGGAGGTGGGGGCTGTGTGTGTGTGTGGAACTGGTAACTAATATTAAA
A_73_P050566,A_73_120800|280827	0.00442326	0.000815767	up	2.72739	2.72739	1.44752	IL7	Bos taurus interleukin 7 (IL7), mRNA [NM_173924]///Rep: Interleukin-7 precursor - Bos taurus (Bovine), complete [TC400018]	GAATTTGGAAGAGAATAAATCTTCAAGGGAACAGAAAAAACAGAATGACCTGTGTTTCCT///GTAGTACCGGAAGATGGACTTAAACAATGGAAACCAAATCCTGCAATCAACAAAACTATT
A_73_P277316,A_73_104627,A_73_P265271|515499	0.00107668	6.15454e-05	up	2.72187	2.72187	1.4446	PCNA	Bos taurus proliferating cell nuclear antigen (PCNA), mRNA [NM_001034494]	AGTCAAATCTGGTCTTGTTAACTGAGTAATACTTCTGCCTTACCTAGGAATAATCCTTAT///TTTTTTAGCCTAGGGAGCCTTGTACAGGAGTCTTGGAAGTGTTAGTAGATCTGTGATAGG///CTCACTGTATCCAGTAGATAAATTACCTTCCTGGTGTGTTAGGGAAGGAGACTGACAGCA
A_73_P127466,A_73_P113056,A_73_P065781|787696	0.00496993	0.000968035	up	2.71968	2.71968	1.44344	TOP2A	topoisomerase (DNA) II alpha [Source:HGNC Symbol;Acc:HGNC:11989] [ENSBTAT00000061367]	GCAAGAGCTAGAAACATTGAAGAGAAAGAGTCCATCAGATTTGTGGAAAGAAGACTTGGC///CTCGGGCAAAATCTGTAAGAACAAAGAAACCTATAAAGTACCTTGAAGAATCAGATGAAG///CGACATGTTGATTATGTAGCTGATCAGATTGTGACTAAACTTGTTGATGTTGTGAAGAAA
A_73_P102076,A_73_P101626,A_73_118714,A_73_P122971,A_73_P410296|281227	0.00143709	0.000113295	up	2.71846	2.71846	1.44279	HMMR	Bos taurus hyaluronan mediated motility receptor (HMMR), mRNA [NM_001206621]	CAAAACTTCAGGAGGAATTGAATAAAGTTCTGGGTATCAAACACTTTGACCCTTCTAAGG///AGAGAACGGGACGAAAATCTAAATTCTGAGATACAAAGCTTAAAAGAGAGGTCTATTCTT///CAGGAGGAATTGAATAAAGTTCTGGGTATCAAACACTTTGATCCTTCAAAGGCTTTTCTT///CCTTAGAGAATTCGTCTAGCTGCTTAACATCTGTTTGATTCCTGGGTGTTTGATTAATAT///TTTGTCATGTTTCCCCATTGATGGACCAACAGCAACTATTTTAATCAGGATAACTTTTCT
A_73_P041171	0.00957771	0.00252318	up	2.71387	2.71387	1.44035		Rep: SP140 protein - Homo sapiens (Human), partial (27%) [TC462863]	GTGAGAAAACCCAAGAAGAGAAGAAGTAAGAGTGCATGCAATTTTATTTGCTTTTGATAC
A_73_P092531	0.0394608	0.0161336	up	2.71276	2.71276	1.43976			TTACCAAAGAAATTTAAGGGCCATAAAGCCAAAAGCAAATAAAGCCTTTTCAAGTAAGCC
A_73_P333536,A_73_P204697,A_73_P113186|100299171	0.000854931	3.39513e-05	up	2.71191	2.71191	1.43931	GINS2	GINS complex subunit 2 [Source:HGNC Symbol;Acc:HGNC:24575] [ENSBTAT00000061540]	TCGGGACATGACAGAGATACTCACGTTTCTGGAACTCTAGACCACTTCTGAATCTACGAA///TACATGGAGCTCACCAAACTGCTGTTAAATCATGCTTCGGACAACATCCCGAAAGCAGAT///GAAACTTTTACACCTATGCCCAGCCCTTACTACATGGAGCTCACCAAACTGCTGTTAAAT
A_73_P053139	0.0182817	0.00600369	up	2.71	2.71	1.43829		Rep: PREDICTED: MAD2-like 1 - Pan troglodytes, partial (84%) [TC450007]	ATGGCAGTTTGATATTGAGTTCATAAGATGTAAAAGATGCAATAGTGCACCCAGAGAAAA
A_73_P159902|517354	0.000512795	2.80573e-06	up	2.70804	2.70804	1.43725	CX3CL1	PREDICTED: Bos taurus chemokine (C-X3-C motif) ligand 1 (CX3CL1), mRNA [XM_595523]	TCCTTTGCAGACAGATGCTGAGAGAGTGCACATGCGGCTCTGGTCCACAGAGAGAGGGAA
A_73_P052006,A_73_P069761|530773	0.0036943	0.000619325	up	2.70331	2.70331	1.43473	LOC530773	Bos taurus germinal histone H4-like (LOC530773), mRNA [NM_001145871]	TAATACGATTGTCGTCTCTTTCTTGTTGAAAATGTCTGGCAGGGGCAAAGGAGGGAAAGG///TGTTCTTGGAAAACGTGATCCGCGATGCAGTGACGTACACGGAGCACGCCAAGCGCAAGA
A_73_105757,A_73_P261571|541250	0.000468303	4.20774e-07	up	2.70019	2.70019	1.43306	PSRC1	Bos taurus proline and serine rich coiled-coil 1 (PSRC1), mRNA [NM_001046501]	ATTCTGTGACTCCTAATGGGCCAGTTTATAATAAGCTTACTCCATCAGTCTGCATTTTTT///TAGAAGAAGATGTAAAGTTTATAGCGGATGAGACCTTGGACTTTGGGGGGCTGTCACCAT
A_73_P086951|510535	0.0190335	0.00631792	up	2.69911	2.69911	1.43249	FSD1L	Bos taurus fibronectin type III and SPRY domain containing 1 like (FSD1L), mRNA [NM_001192260]	TACTAATCGCAGCAGTTTACAAGTGGTGGAAGTCAGGTTTGCTACCTTCTGCTCTAAGGT
A_73_115275,A_73_P467788|523047	0.0006265	8.4342e-06	up	2.69751	2.69751	1.43163	SUV39H1	Bos taurus suppressor of variegation 3-9 homolog 1 (SUV39H1), mRNA [NM_001046264]	CTCTTGTATATCCCCTTGGCCCTCCCAGTCTGGGAATGGGCGTCAATAAAACAGGTTATT///AACCACGGCAGAATCTCAAGTGTGTGCGCATTCTCAAGCAATTTCACAAGGACTTGGAAA
A_73_P059306,A_73_P048101|616082	0.00107657	6.14986e-05	up	2.68974	2.68974	1.42746	DUPD1	Bos taurus dual specificity phosphatase and pro isomerase domain containing 1 (DUPD1), mRNA [NM_001105444]	AAAGGAAAGAAAATCCCTTGGCTCCAAAATGACATCCGGAGAATCGAAGACAGGCCTCAA///GTATAACTGAATCACTTTGCTGTACAGCAGAAATGAATGCAACACTGTAAATCAACTGTA
A_73_P072751,A_73_P128706|613491	0.015096	0.00468117	up	2.68731	2.68731	1.42616	TMEM71	transmembrane protein 71 [Source:HGNC Symbol;Acc:HGNC:26572] [ENSBTAT00000022779]	ATGTTGTCAAGTCATCCTTTTTCAGCCTTGCCAACTATTTCAAAGCCACCACGGGCACTT///TTTGACTGTTCTCTGACTGATGACTGGGAGTCACAGAAGCTGAATGCAGAGTCTGTGAAA
A_73_103276|504548	0.00216814	0.000251995	up	2.68171	2.68171	1.42315	LOC504548	PREDICTED: Bos taurus ubiquitin D-like (LOC504548), mRNA [XM_580689]	TCTCATATGACTCAATAATCATTGAGTCAAACTGACACTCTGCCTGTAGACAATAGTGAA
A_73_P138256	0.0194104	0.00648235	up	2.68169	2.68169	1.42314		010127BEMN064228HT BEMN Bos taurus cDNA, mRNA sequence [DY042833]	ACACCGTTTGTAAGACCTTCTTAGACTGGAAATAAAATTGTTTTTTCTTACCGTCGTGTC
A_73_P073991|507507	0.00178137	0.000171384	up	2.68118	2.68118	1.42287	MCM8	Bos taurus minichromosome maintenance 8 homologous recombination repair factor (MCM8), mRNA [NM_001193036]	TATGTAAAAGGACTACCAAGCCAGGCTGTCCTGGGTTTGTTGTGAAGAATATGCAAAAAA
A_73_P149416	0.0012793	8.91944e-05	up	2.68006	2.68006	1.42227		157099 MARC 4BOV Bos taurus cDNA 5', mRNA sequence [BE668381]	GAACTAAGATCACATGTGATAGGCAGCTCAGCCAAAAAATAAAAATATCCTGCAGCTGGA
A_73_P093896|507344	0.00187187	0.000191205	up	2.67947	2.67947	1.42195	GBX2	Bos taurus gastrulation brain homeobox 2 (GBX2), mRNA [NM_001192145]	AAGATCGTCGTCCCCATACCCGTCCACGTCAGCAGGTTCGCTATCAGAAGTCAGCATCAG
A_73_109859	0.00276948	0.000387767	up	2.67501	2.67501	1.41955		4097030 BARC 10BOV Bos taurus cDNA clone 10BOV36_D13 5', mRNA sequence [CK956820]	TGGAGGGTCTTATTTATGCCTGTTTCTGTGTAACTGTCTTCGGGGCTGAAGGTCGCGTGC
A_73_P042216|768238	0.00390086	0.000674032	up	2.67458	2.67458	1.41931	C17H4orf46	Bos taurus chromosome 17 open reading frame, human C4orf46 (C17H4orf46), mRNA [NM_001078113]	AAGGGGACACATGGATGGGCAAAGGATAGTTTTATTTAACATATTAAGTCACAGTTCTTG
A_73_105006,A_73_P273901,A_73_P090191|528390	0.000592948	5.61463e-06	up	2.66776	2.66776	1.41563	NR4A1	Bos taurus nuclear receptor subfamily 4 group A member 1 (NR4A1), mRNA [NM_001075911]	TCCTACTTGCTCTCTTCCTGCCCTCCTTCCACGTGTACATAGACTCACTCTAGGAGGAAG///TTTATCCTCCGTCTGGCCTACCGGTCTAAACCAGCCGAGGGGAAGCTCATCTTCTGCTCA///ATGCTGTAAATAAGCCGAATGCTGCTGTAAATACAGGAAGGAAGAGGTTGAGGTGGGAGT
A_73_110113,A_73_P043316|286849	0.000655957	1.17065e-05	up	2.66632	2.66632	1.41485	CD40	Bos taurus CD40 molecule (CD40), mRNA [NM_001105611]	CGAGCGGTTCATTGCTGACAGATGTCATTCGGTGGCTGCTCTGAGCCCAGGAGGCATATA///TTCTCCAACGTGTCATCTGCTTTTGAAAAGTGTCACCGTTGGACAAGCTGCGAGAGAAAA
A_73_107277	0.0012252	7.92013e-05	up	2.66446	2.66446	1.41384		Rep: LOC506727 protein - Bos Taurus, complete [TC394932]	TTGGGGAATAAAGCAGTACAGTTTCTGACCATTTAGAGATTATAGTCTAGTGAGTGAGAC
A_73_113353	0.00097315	4.87019e-05	up	2.65994	2.65994	1.41139		LB02725.CR_D08 GC_BGC-27 Bos taurus cDNA clone IMAGE:8315482, mRNA sequence [DV892904]	CTATCTTGTGTGCACTAGAAATCAGTTGCTTGATGGTAGCTATTAAACCTAAGATTACTG
A_73_117953	0.0460285	0.0194915	up	2.65865	2.65865	1.41069		membrane spanning 4-domains A10 [Source:HGNC Symbol;Acc:HGNC:13368] [ENSBTAT00000002270]	TGCCTCTTGTCCCTGACTCACCATTGGAGCTCAAGGAACAGTCGATGATGCCTCCACCGT
A_73_105245|520327	0.0398446	0.0163419	up	2.65767	2.65767	1.41016	KYNU	Bos taurus kynureninase (KYNU), mRNA [NM_001191308]	GAGCCAGATGGCATTCGAGTGGCTCCAGTTCCTCTCTACAATTCTTTCCATGATGTTTAT
A_73_P042221,A_73_116098|281386	0.000852758	3.3591e-05	up	2.65264	2.65264	1.40743	SERPINF1	Bos taurus serpin family F member 1 (SERPINF1), mRNA [NM_174140]	TTTCATCTTTGTACTGAGGGACACAGACACAGGGGCCCTTCTCTTCATAGGCAAAATTCT///AAACACTAGAGGGATGGCAGATTATATATTATACGAAGGCTGCCCCTACATTTCAATGTA
A_73_P038106|524530	0.000667089	1.4718e-05	up	2.64835	2.64835	1.40509	CCND1	Bos taurus cyclin D1 (CCND1), mRNA [NM_001046273]	GTGTTTTCCTTTGCTCTTTTTCCCTTCCGTCTCTGACTTAAGCAAAAGAAAAAAGTACCC
A_73_P495063	0.00105816	5.97828e-05	up	2.64649	2.64649	1.40408			TGTTGTACCATGGCAATGTGATTCCCAAAGATGTCGATGCTGTCATTGCCACCATCAAGA
A_73_P263711,A_73_104179,A_73_P106101,A_73_106727|535183	0.00241	0.00030579	up	2.64625	2.64625	1.40395	ZEB1	Bos taurus zinc finger E-box binding homeobox 1 (ZEB1), mRNA [NM_001206590]	GCACTGAATGTGGAAAAGCTTTCAAATACAAACACCATCTAAAAGAGCACTTAAGAATCC///TGGTCATTTTCTAGTTTTTTACCAGACTCCCCATCTCACAATAAAATGCATCAACAAGCC///AATCATCATTAACTACAGTCTTGAACAACCTAGCCAACTTCAAGTTGTTCCTCAGAATTT///AGTGGAAATCAGGATGAAAGGCAAGACACTAGCTCAGAAGGAGTATCCAACGTAGAGGAT
A_73_P350906,A_73_P033626,A_73_P190912|615087	0.000512795	2.95616e-06	up	2.64017	2.64017	1.40063	TUBB	Bos taurus tubulin beta class I (TUBB), mRNA [NM_001046549]	AGAATAAGAACAGCAGCTACTTCGTGGAATGGATCCCCAACAACGTCAAGACAGCTGTTT///GGGGGATTCTAGAACAGTGCCTGGCACATAATAGGCGCTCAATAAATATTTGTTGTTTCT///AGAACACTGATGAAACCTACTGCATTGACAACGAGGCCCTTTACGACATATGTTTCCGCA
A_73_P095846	0.00301613	0.000446178	up	2.63815	2.63815	1.39953		Histone H4 [Source:UniProtKB/Swiss-Prot;Acc:P62803] [ENSBTAT00000056505]	TCTTATCTATGAAGAGACTCGTGGGGTGCTGAAAGTGTTTCTGGAAAATGTGATCCGGGA
A_73_P327771,A_73_P044906,A_73_P323816|513605	0.00134008	9.89405e-05	up	2.63778	2.63778	1.39933	GTPBP2	Bos taurus GTP binding protein 2 (GTPBP2), mRNA [NM_001083421]	TAAGTCCTCTCTTGTTTTAGTAGTTTGCAGTGAGCATCCCTTTCCCTCTGTTGCAGGGAA///GGACTCAGGGATTTGGTTGAGGTTTCTCTGCGTGTATGTATATATATATATATATACACA///AGTCTTTCTGAATATTTTGCCTCCACTCACCAATAGCAAAGAGCAGGAGGAGCTCATGCA
A_73_P084721,A_73_101212|533359	0.000655957	1.35069e-05	up	2.63202	2.63202	1.39617	MXD3	Bos taurus MAX dimerization protein 3 (MXD3), mRNA [NM_001193259]	TGACTGTGTCCGATACACCACACTGAGCCTTCTGCGCAGGGCCAGAATGCACATCCAGAA///TTCCTAAACAAGGGCCCCTGGCCTTTGCCCCACGCATACTGTATTTTCATTAAAAGCCTC
A_73_116234|509022	0.023278	0.00821675	up	2.63129	2.63129	1.39577	ARHGAP22	Rho GTPase activating protein 22 [Source:HGNC Symbol;Acc:HGNC:30320] [ENSBTAT00000010363]	TGGTCCAGCACCTGATGACCATCCTGATCCGCAAACACAGCCAGCTCTTCACTTCGAGGA
A_73_P045611,A_73_P405046|516328	0.000777179	2.62057e-05	up	2.62923	2.62923	1.39464	USP1	Bos taurus ubiquitin specific peptidase 1 (USP1), mRNA [NM_001046224]	CCCCTTCTACATCTCCTACATCTACTCCTTACTTGCTATTTTATAAGAAATTATAGAGTG///CCTTGGATTTCACAGATTCTCAAGAAAATGAAGAAAAGACTTCTGAATATAAAGGGTCTG
A_73_P030821,A_73_111845|614354	0.00603736	0.00131082	up	2.62653	2.62653	1.39316	CERS3	Bos taurus ceramide synthase 3 (CERS3), mRNA [NM_001099389]	TAAGGGTCTGTATTACCAAGCTAAGTAAGTGGAAGCTGAGACCACAGGGACTAGTAAAGC///TTTGGAGATGAGTTTTTATTGGTCTCTCTTATTTAGCCTTGGCTCTGATATCAAGAGAAA
A_73_P034831|512660	0.00317309	0.000481927	up	2.62567	2.62567	1.39269	SEMA3C	Bos taurus semaphorin 3C (SEMA3C), mRNA [NM_001101082]	CTTAATGTTGTCTTAAGTGGGACTTATGCTTCCATTAATAAAGGTCTGTCTTCAATGATC
A_73_P281781,A_73_107315|508022	0.000596698	5.72263e-06	up	2.62185	2.62185	1.39059	CDCA8	Bos taurus cell division cycle associated 8 (CDCA8), mRNA [NM_001083652]	AGGAACCTCATGTTCTCAGGAGGACTGCCAATCACTCTGACCAGAGAGCCCTGTGCAGCT///GCCATGCCCAGTAGTTTTGTCTCAAGCTGATTTGTGGACCAGTATTGTGTATTATCCCTG
A_73_100500	0.00900786	0.00230922	up	2.6195	2.6195	1.38929			TTTCCAGCCCAACCATCAAGGACAAACCTGTTCAGATCCGTCCTTGGAATTTGAGTGATA
A_73_P050306|534090	0.00177613	0.00017007	up	2.61608	2.61608	1.38741	BDH1	Bos taurus 3-hydroxybutyrate dehydrogenase 1 (BDH1), mRNA [NM_001034600]	GGCAAACATGGTGCATCTGTCTTTCTGGAGTTGATTTTATACAAAGATTTTAGGTAGATA
A_73_116830|535385	0.0165401	0.00526997	up	2.60973	2.60973	1.3839	UNC45B	unc-45 myosin chaperone B [Source:HGNC Symbol;Acc:HGNC:14304] [ENSBTAT00000003766]	GTAGGAGCTAACAGGTCCTACTTTAAATATGTAAAGTAGTGTGACTATAAAGTTTAGTGC
A_73_P089961,A_73_P193122,A_73_P293396|786159	0.000825657	3.02857e-05	up	2.60816	2.60816	1.38303	NCAPD2	Bos taurus non-SMC condensin I complex subunit D2 (NCAPD2), mRNA [NM_001206711]	AACCGAGTTGAGCTGCTTTCCTTGGAATGTATATATATATGTGTGTTTGTCAGTTTTCTT///CATTCCTTTTGTAAAATGCTTGTTTGCCTGTCTCCTTGGTTTTTTAATGCATAAATGGTC///TTCTTTGTGATGGTGTTCCAATTTGGGGTACCTCAGGCCCTGTTTGGGGTGCGCCGCATG
A_73_107504|506032	0.00221953	0.000266418	up	2.60305	2.60305	1.3802	C19H17orf75	chromosome 17 open reading frame 75 [Source:HGNC Symbol;Acc:HGNC:30173] [ENSBTAT00000027955]	TGTGAAGTCCTGCAAGCCGTGGTGTTTAAAACTGTGGTAGTTTGGTAACTGTCATAGGAT
A_73_113697,A_73_P039731|790210	0.000761389	2.49778e-05	up	2.59949	2.59949	1.37823	LRR1	Bos taurus leucine rich repeat protein 1 (LRR1), mRNA [NM_001105025]	GTTGTGGGGTTATCTTTTAATGTTAAACAGATATTGATCCCAACCACTCTGTTCATAGAA///ACTGAAGCACCCATTATTTCTTACTTCTGTTCTCTAGCCTGTTATGTAAATTCTTGTGAT
A_73_P321876,A_73_121274|507620	0.0016231	0.000144607	up	2.59527	2.59527	1.37589	PALB2	Bos taurus partner and localizer of BRCA2 (PALB2), mRNA [NM_001205615]	AAGAAAGTCAGCGTGCACCTCTCTGTTAGATCACCATGAACTACTTTTGCCAACTACTGG///TGGGAGAGAGGGTATATAAGTGGATTTTTGTGATTCCTCACATTTGCACATTTCCTTTTA
A_73_P088996|613784	0.0302429	0.0115326	up	2.59155	2.59155	1.37382	SLC35B4	Bos taurus solute carrier family 35 member B4 (SLC35B4), mRNA [NM_001192941]	CAATAATTCTGAACTGTATCAGGTTCCAGTCGTTGGTGTGACAGTGCCCATCATGTGGTT
A_73_119785	0.00513624	0.00102056	up	2.59116	2.59116	1.3736			GTGATGTTGCACAAAATGCAGAGAAACCAAGAAGGGGGAGGGTTAATGTATTAAATGTGC
A_73_P400776,A_73_P111606,A_73_106763,A_73_P277371,A_73_P343436|515911	0.00299079	0.000440264	up	2.58549	2.58549	1.37044	STRA6	Bos taurus stimulated by retinoic acid 6 (STRA6), mRNA [NM_001075730]	TTGGAAGATACTGGCTCTGCTGTATTACCCTGCCCTCTACTATCCGCTGGCTGCCTGTGC///GGTATGCCCTTAGAGATTATGAAAGAGGTTAATGTGCTCTCTGTAAAAAACTTGTGCTTG///GTTGGTATGCCCTTAGAGATTATGAAAGAGGTTAGTGTGCTCTCTGTAATAAACTTGTGC///TCTGGTTGGATCGAAGTCTATCAGCACTATGAGCCTCGAGCCTCGGGAAGGCTCTGGTCT///GAGAGCTAAAAGCAAGAAAGTAACCTTTAGGATTAAAGAGAAACGTTTCTTTGTTTGGGT
A_73_P078291	0.00287636	0.000412801	up	2.58206	2.58206	1.36852		LB0044.CR_D12 GC_BGC-04 Bos taurus cDNA clone IMAGE:30957683, mRNA sequence [DT829342]	CTGCTGAAAATGGAGGGGCCAAAATTATAGAGGCACCAGTTCCTGAAAGAGAAATAGAGG
A_73_P256241|615784	0.00159016	0.000138991	up	2.58069	2.58069	1.36776	MZT1	Bos taurus mitotic spindle organizing protein 1 (MZT1), mRNA [NM_001206331]	GTGGATTTATGTTGTATTAGGCTAAAAGTTGACAGAATTTCCGCTACCATGTATGGATTT
A_73_P038796,A_73_P353841|514346	0.00819095	0.00202685	up	2.57529	2.57529	1.36474	SDS	Bos taurus serine dehydratase (SDS), mRNA [NM_001075662]	TATGAAGGTTTATCGGGAACATCCCATTTTCTCTGAAGTTGTCTCGGACCAGGAAGCTGT///TCTGGGAAGGCCACTCTTCCATCGTGAAGGAGCTGAAGGAGACGATGACCGAAAAGCCAG
A_73_111517|529769	0.00104935	5.86654e-05	up	2.57448	2.57448	1.36428	TRAIP	Bos taurus TRAF interacting protein (TRAIP), mRNA [NM_001102124]	GATGGGCAATGGTGGTAGGGAGAGGAGGGGGGAAATTTCTATGTGAAATAAAAAAGATGC
A_73_P386986,A_73_P093911,A_73_P193172,A_73_P416951|530657	0.0021286	0.000243857	up	2.57329	2.57329	1.36361	COL6A3	collagen type VI alpha 3 chain [Source:HGNC Symbol;Acc:HGNC:2213] [ENSBTAT00000018479]///collagen type VI alpha 3 chain [Source:HGNC Symbol;Acc:HGNC:2213] [ENSBTAT00000065192]	ACTCAATGGACCAATGTGCGCTGGTCCAGAGCATCAAAGATAAATGCCCTTGCTGTTACG///ATGACTTTAGATGGAAAGCCTGTGTATGGAGAAGAAACAAGAATCCAGCTTTTTCATCCC///TAAAATCTGCAGGAATTGCGAGCTTAGGGGTTGGAGACCGAAATATTGACAGAACAGAGC///ATAACGTTACTTCAAGTCCTACATCTAAACTGGTGACCACAACGAAGCCGGTGATCACCA
A_73_P154252,A_73_113661|614629	0.000966475	4.79265e-05	up	2.56457	2.56457	1.35872	BOLA3	UMC-bof_0A02-006-d08 Ovarian Follicle bof Bos taurus cDNA 3', mRNA sequence [CX954338]///Bos taurus bolA family member 3 (BOLA3), mRNA [NM_001035452]	ATATGAATATATATTCCACCCCACTACCTTTCTAAAACACAAACGATGGCATGTCAAACA///TACTGCTAAAACTTCGGATGACTCTTCCTACCACCGTGCTTCCTCAGCATATGACAAAAA
A_73_P132636,A_73_P070276|617312	0.000512795	2.65307e-06	up	2.56238	2.56238	1.35748	CEP72	centrosomal protein 72 [Source:HGNC Symbol;Acc:HGNC:25547] [ENSBTAT00000015158]	ATCTCTGGAGGAGAGCAGTAGCTTGAAGTCGCTTTTGTTGAGCATGAAGAAAGATGTGAG///CAAGAAAGCAGCTCTTTAGGGCGATTAAAGAAAATAATTTATGGTGTAACAGGCAACCTT
A_73_P048061|538479	0.0149188	0.00459985	up	2.56222	2.56222	1.3574	KCNJ12	Bos taurus potassium voltage-gated channel subfamily J member 12 (KCNJ12), mRNA [NM_001024690]	TTTAGATGTTTTATGTTTCTTTACAACGCCTGGGAATGTTGGCGGGAGAGTGGGTGGCTT
A_73_110312	0.000986668	4.99417e-05	up	2.56167	2.56167	1.35708		Rep: Endonuclease YhcR - Stigmatella aurantiaca DW4/3-1, partial (3%) [TC407766]	TAACTGAATTATTTTATTTCTTATGTTCACGTGAGAAACATATGCCAAATGATTAGTGGA
A_73_P086441,A_73_P434996|782201	0.000542939	4.00861e-06	up	2.56157	2.56157	1.35703	GNE	Bos taurus glucosamine (UDP-N-acetyl)-2-epimerase/N-acetylmannosamine kinase (GNE), mRNA [NM_001191143]	AACAGCTTTAGGTCTTGGGGTTGTGAACATCCTCCACACTATGAATCCTTCCCTTGTGAT///TGAAATAATCTCCAGGTCCTGGTTGAAACATTCCATGTTGACTCCTGGGAGGGAAACTTG
A_73_105328|505766	0.00563543	0.00117551	up	2.55972	2.55972	1.35599	BMP2K	Bos taurus BMP2 inducible kinase (BMP2K), mRNA [NM_001304265]	ATGAGGAAGTTCTCCAGGGAGAACAAGGAGATTTTAATGACGACGACACTGAACCGGAAA
A_73_P034751|505284	0.000609441	7.41149e-06	up	2.55923	2.55923	1.35571	CENPH	Bos taurus centromere protein H (CENPH), mRNA [NM_001034236]	ACAGCATTCCTGGAAATCTCAGCTCCCATTTGTAATACTTCTGTGTATTTGTTTATCAAC
A_73_116813|504637	0.000677244	1.58597e-05	up	2.55756	2.55756	1.35477	RFC4	Bos taurus replication factor C subunit 4 (RFC4), mRNA [NM_001045894]	ATGAACATCTGCAGCTGATCAGCCTCTGTGCTACTGTGATGCAGCAGTTAACTCAGAATT
A_73_102485,A_73_P494958|519217	0.00289026	0.000417466	up	2.55566	2.55566	1.35369	CDK2	Bos taurus cyclin dependent kinase 2 (CDK2), mRNA [NM_001014934]	AGGCGGAATTGAAAGGACGCTTCAGTATTAGATGCACTTAAGTCAGCCTCCACTACCCTC///GGAATTGAAAGGACGCTTCAGTATTAGATGCAATTAAGTCAGCCTCCACTACCCTCTCTC
A_73_100836,A_73_P070011|386587	0.000991589	5.04376e-05	up	2.55178	2.55178	1.3515	GDNF	Bos taurus glial cell derived neurotrophic factor (GDNF), mRNA [NM_001192849]///PREDICTED: Bos taurus glial cell derived neurotrophic factor (GDNF), transcript variant X2, mRNA [XM_005221583]	GTGTTGCAGACCCATCGCCTTTGATGACGACCTGTCCTTTTTAGATGATAACCTGGTTTA///ACTCTAAGATGAAGTTATGGGATGTCGTGGCTGTCTGCCTGGTGCTGCTCCACACCGCGT
A_73_101979	0.00249926	0.000325581	up	2.55143	2.55143	1.3513		Rep: Reverse transcriptase-like - Bos taurus (Bovine), partial (16%) [TC443361]	GCATATATAAAGGAAGCTTTTTTCCCTCCCCTGAAATAGTTCCTGGCATGTGGTAGGCAC
A_73_117295,A_73_P255511|509802	0.000888661	3.82193e-05	up	2.55082	2.55082	1.35096	SNRPA	Bos taurus small nuclear ribonucleoprotein polypeptide A (SNRPA), mRNA [NM_001046039]	ACCCAGAGTCTGTCCCCAGACATTGCACCTGGCGCTGTTAGGCTGGAATTAAAGTGTTTT///ATGAGAAGATCAAGAAGGATGAGCTGAAGAAGTCCCTGTATGCCATCTTCTCCCAGTTTG
A_73_P076471|787385	0.0456516	0.019285	up	2.54927	2.54927	1.35008	LOC787385	GB	GCTTTAATTTCTGCAGTTCCATTGTCATTCATCACTTCTTCTGTGATAGCCCCCCACTTT
A_73_P050891,A_73_114349|338066	0.000884096	3.78242e-05	up	2.54925	2.54925	1.35007	ADGRE5	Bos taurus adhesion G protein-coupled receptor E5 (ADGRE5), mRNA [NM_176661]///adhesion G protein-coupled receptor E5 [Source:HGNC Symbol;Acc:HGNC:1711] [ENSBTAT00000029084]	CATCTTTGTGATTACTGTCTGGAAACTCACTCAGAAGTTTTCTGAAATCAACCCTGACAT///TTTTAGGTTAAGCTAAAACTGAGGCTGGGTGGGAGAGGGGCAGGGCCCTTCTCAGCTCCT
A_73_113726	0.000623455	8.06724e-06	up	2.54769	2.54769	1.34919		Rep: Glycolate oxidase subunit GlcE - Pseudomonas aeruginosa 2192, partial (5%) [TC451272]	AGCAAGGTGAGTTCACTGGAGGAGGTGTGAGCTTGCCGAGTGAACACCGGCTGAGTTTGT
A_73_117217	0.000609441	6.89078e-06	up	2.54355	2.54355	1.34684		Rep: TMPO protein - Bos taurus (Bovine), complete [TC464635]	AATGTGTACTTGGTCTTTTGTCTGTGTCTGTTTAATTCCACTAGAATAAATGTGTCCTTG
A_73_100920	0.00433128	0.000791223	up	2.53697	2.53697	1.34311		Rep: Membrane protein - Oenococcus oeni ATCC BAA-1163, partial (7%) [TC469465]	CACCTTTGGAAAAGGAATGCAAATAAAGAGCTGTCCCTGGAAACTAAATGTGAATTTCTG
A_73_101695,A_73_P093801|527379	0.00156515	0.000132573	up	2.53661	2.53661	1.3429	ZMYM1	Bos taurus zinc finger MYM-type containing 1 (ZMYM1), mRNA [NM_001205509]	CATTGGCAGATACTCATGATGCCCTGCCCATTGTGAACTCTGATGTATTACAAGGTAAAA///ACAAGAAAAGCTTAGTGGCTTAGCCCTAATGGCCGTTGAGCAGGAATTGGTAGATAAACT
A_73_107919,A_73_P296451|512098	0.0128901	0.00380483	up	2.53365	2.53365	1.34122	CES1	Bos taurus carboxylesterase 1 (monocyte/macrophage serine esterase 1) (CES1), mRNA [NM_001075554]	GAGTGGGAGAGGTCAGGGAGGGGGAGTTTCTGTTTCTGTGGCCTCGATTTGGAAATAAAC///AAGACTGTCTTTACCTAAATATATACACCCCTGCTGACTTGACGAAGAGAAGCAGGCTGC
A_73_P073341|509563	0.000945336	4.44318e-05	up	2.53214	2.53214	1.34036	DSCC1	Bos taurus defective in sister chromatid cohesion 1 homolog (S. cerevisiae) (DSCC1), mRNA [NM_001205657]	GCACTGCTCACAAAATATGCTCGATCTTCAATGCAAAATGGTGTTAAAGTTTATAACTCA
A_73_116739|535225	0.00797887	0.00195615	up	2.53172	2.53172	1.34012	LIMK1	Bos taurus LIM domain kinase 1 (LIMK1), mRNA [NM_001206904]	ACCCCGAATGCTTCATCTGCCTCACATGTGGAACCTTCATCGGTGACGGGGACACCTACA
A_73_115883|510898	0.0172223	0.00557188	up	2.53083	2.53083	1.33961	DNAJC9	Bos taurus DnaJ heat shock protein family (Hsp40) member C9 (DNAJC9), mRNA [NM_001205686]	AGCAGACAAAAGGATCGGCAAAAGGAAATGGACAATTTTCTGGCTCAGATGGAAGCAAAG
A_73_119702|538558	0.00195317	0.000207286	up	2.5254	2.5254	1.33651	BRI3BP	Bos taurus BRI3 binding protein (BRI3BP), mRNA [NM_001099087]	TGAGAATGCCGTGCTGCCCTTGTGTTTCGTGGTGGCCATCTACTTCATGACCGGTCCCAT
A_73_108208|616114	0.00241696	0.000307869	up	2.52118	2.52118	1.3341	NDC1	NDC1 transmembrane nucleoporin [Source:HGNC Symbol;Acc:HGNC:25525] [ENSBTAT00000043246]	AACATTAAGATTTGCATTTAGAGCATCACTGAAAACAGCCATCTATAGGATAACTACCAC
A_73_108930	0.000509628	1.58135e-06	up	2.52046	2.52046	1.33369		Rep: CDH8 protein - Bos taurus (Bovine), partial (11%) [TC439222]	TTTTGGCAAAGCAATCCGTACATTTCTCTTATTTATTAAATCACTGGCTTTGGTGTTACG
A_73_P205237	0.00120414	7.70346e-05	up	2.51904	2.51904	1.33287		PREDICTED: Bos taurus matrix metallopeptidase 25 (MMP25), mRNA [XM_010819231]	CCTCTCAGACGTCATGAAGTCAGGTTCACAAAAATGCCACATGGTATTGAATTATGTTTT
A_73_P473583,A_73_P045976,A_73_P392036|527084	0.0012282	8.03502e-05	up	2.51843	2.51843	1.33253	CCDC77	Bos taurus coiled-coil domain containing 77 (CCDC77), mRNA [NM_001102106]	TATTATCAGAAGAAGATGTCTGAGTGTGAGGCAGAGAACGAGGACTTGCTGAAGAAGCTG///CCACTTTGGTAAGAGTGAGTGAAAAATTCAGTATTTTACCAGTGCCATGTGTGTGTGTTT///ACATAAAGATGCCACTTTGGTAAGAGTGAGTGAAAAATTCAGTATTTTACCAGTGCCATG
A_73_111842|282355	0.00126051	8.54832e-05	up	2.51625	2.51625	1.33127	SLC1A5	Bos taurus solute carrier family 1 member 5 (SLC1A5), mRNA [NM_174601]	ACTCATAACACGTTGTTGTTACTCTGAGGATGTTTATAACAATAAAACTGTCAGTTTGTA
A_73_115089	0.0404232	0.0166333	up	2.51088	2.51088	1.3282			AAACAACTTCAACACGATAGACAACTGCTTAAAGTCCTGCTGTCCTGACTGCATGAAGAC
A_73_P045526,A_73_P253751|538735	0.0011693	7.19256e-05	up	2.5078	2.5078	1.32642	HYLS1	Bos taurus HYLS1, centriolar and ciliogenesis associated (HYLS1), mRNA [NM_001046439]	TGTGACCTTGCAAATGGTGTGATGCCCAAGAAACTTACGTCCTTCCCTCTTTTTCCTTCT///CTTTGTCGTGCAGAAGCCCAGTCCAAGCCTCAGCATATATATGTTCCAAACAATTACCTA
A_73_P047966,A_73_P122226,A_73_P372906|615626	0.00173292	0.00016204	up	2.50765	2.50765	1.32634	PTMA	Bos taurus prothymosin, alpha (gene sequence 28) (PTMA), mRNA [NM_001039953]	CGAGGATAACGATGTGGATACCAAGAAGCAGAAGACTGATAAAGATGACTAGACAGCAAA///TCCTACTCTGACTTTACTTGTGGTGTGACCATGTTCATTATAATCTCAAAGGAGAAAAAA///CTGTCCTACTCTGACTATACTTGAGGTGTGACCATGTTCATTGTAATCTCAAAGGAGAAA
A_73_P079781|787969	0.00359667	0.000591186	up	2.50439	2.50439	1.32446	KNL1	PREDICTED: Bos taurus cancer susceptibility candidate 5 (CASC5), mRNA [XM_001790629]	AACCAGAATATCAGACCATTGGCCACGATCCCAGAATCTAAATATTCTGGTCCAGTTATG
A_73_115636	0.000958057	4.67798e-05	up	2.50097	2.50097	1.32249		222135 MARC 2BOV Bos taurus cDNA 5', mRNA sequence [BF074664]	TGGTTTTTCTTTACCAGTTTCTGGCTTTTACTCTCAATATATTTTTGCTAAACTTGTTTC
A_73_P041381,A_73_113296,A_73_P270306|360192	0.00068142	1.62342e-05	up	2.4992	2.4992	1.32147	AURKB	Bos taurus aurora kinase B (AURKB), mRNA [NM_183084]	TTGGTGTTTTTTGAAGCATGAATAGGTGTTGAGTTTCACCTAATGCTTTTTCTGCATGTG///GCATCGTCAAGGTGGACTTAAAGTTCCCTCCTTCTGTGCCCTTGGGAGCCCAGGACTTCA///TTGCGTCTCTACAACTATTTCTATGACCGGCGAAGGATCTACTTGATTCTGGAGTATGCC
A_73_104899,A_73_P340111|614841	0.0474948	0.0202426	up	2.49661	2.49661	1.31997	FAM174B	Bos taurus family with sequence similarity 174 member B (FAM174B), mRNA [NM_001076350]	TCTTCAGTTAGTAACATCCGTTGTTTCTCTGCCCTGTCAGCGTTCTACGTTGTTGGTCTT///ATTTGACATCAAATACAGGTAAAACTTGTTCACCAGCGTGTCGGCATCCTGTGGCAAGCT
A_73_103502,A_73_P064101|519541	0.00536204	0.00109077	up	2.49596	2.49596	1.31959	RNF125	Bos taurus ring finger protein 125 (RNF125), mRNA [NM_001205859]	AATATAAGGCTGAGTATGTGGGTGAAGGATCTTTATTTGCAAATCGGATGACGTTGTGTG///GATGGGCAGAAAAATGTACAACACATTATATGTTCGTCCATGTCTATTGTTGTATCGCAT
A_73_P494638	0.035818	0.0142517	up	2.49535	2.49535	1.31924			CACACACTCTTGGCATCTTGGGCAGAATCATGCTTTGTGAAAGATGTGGTTATCTCCTCA
A_73_117815,A_73_P269226|541175	0.00207989	0.000233831	up	2.49181	2.49181	1.31719	DUSP10	Bos taurus dual specificity phosphatase 10 (DUSP10), mRNA [NM_001034725]	TTTTGATGCCGTTGAGATTTACTTCCCACCAACTGACAAAGCAGGGAGTCTAAAGAAGTC///ATGACTGTTCTCCATCAGGAGATGAAGAGGAAGGAGTATGGATTCTTTCTTTTCTTTTTT
A_73_110133|507631	0.00132715	9.57828e-05	up	2.49114	2.49114	1.31681	TYMS	Bos taurus thymidylate synthetase (TYMS), mRNA [NM_001037816]	CTAAATCTGAGCAAGCTGGGTAACACCCATCCGTCATGTTAATGCCTAGTGTGGTTATGA
A_73_P354381,A_73_P390616,A_73_116873|513195	0.00102679	5.61271e-05	up	2.49104	2.49104	1.31675	CENPT	Bos taurus centromere protein T (CENPT), mRNA [NM_001101969]	ACAAGGCTGGACTGAACCACTACGCAAAACTCTTTAACTTCTATGCTAAGATGCCCATGG///AACATCATACTAACTGCTCCAGAATCTTCCATTGTAATGCCAGAGGCTGTGGTGAAGCTG///TGGGGTTGCTTGGCGCCACATACACTTCTAGGTTTCCTCCCCACCCCTCAGCATCAATAA
A_73_119107,A_73_P073356|617904	0.001942	0.00020455	up	2.48977	2.48977	1.31601	MTBP	Bos taurus MDM2 binding protein (MTBP), mRNA [NM_001193177]	AAAGCAGCGTGAGGTGATTTCTGTGGATGAACTCAAAAGTCTGCTAACATGCACAAGGGA///TCATTCCCTTTGGATGATTATAAATTGGACGGATCTATTATATACCACTTCCTTCCTTAG
A_73_105304	0.0102784	0.00279572	up	2.48954	2.48954	1.31588			GAAAACCTAAGCAGACACGGAGCATTATCAGGATCAGCCACACACGTGTTTCCTTCTATT
A_73_P108491,A_73_P108486,A_73_104879|281032	0.0011795	7.33485e-05	up	2.488	2.488	1.31499	BTG1	Bos taurus BTG anti-proliferation factor 1 (BTG1), mRNA [NM_173999]	ATCAGGTTACCGTTGTATTCGCATCAACCATAAAATGGATCCTCTGATTGGACAGGCAGC///AGGCCGCCGTGGCTCGTTTCTTCCACTTTCCTGCCGCCTCCTGTGTCGAAAATAACTTTT///GTAACTCTCCTTGTACTTAATTGGGTTAAAAGTCTTTTCCACAAACCACCATCTATTTTG
A_73_119506,A_73_P251961|538445	0.000802546	2.85125e-05	up	2.48731	2.48731	1.31459	RNF138	Bos taurus ring finger protein 138 (RNF138), mRNA [NM_001038174]	AGAATCTTTTCAAGTAAACATTTGAAGGCTGTAGACACCTCTGCATCTTTGTACCTGCAA///GAATACAGGTTCTTCTGGGCATCCTACTTTTAAGTGTCCCTTGTGTCAAGAATCAAATTT
A_73_P048536,A_73_102347,A_73_P264501|506970	0.000677244	1.61089e-05	up	2.48636	2.48636	1.31403	MCM5	Bos taurus minichromosome maintenance complex component 5 (MCM5), mRNA [NM_001075290]	ATCATCCAGGACTTCACCAAGCAGAAATACCCGGAGCACGCCATCCACAAGGTCCTGCAG///TGGTGTCTGCCCTGGCTGCAGATCCAGGAAATGTGCTTTTGGAAATTTATAGAAGTAATA///TGTCGTCTGTATTGATGAGTTTGACAAGATGCGAGAGGATGACCGTGTGGCAATTCATGA
A_73_109635,A_73_P055506|507695	0.00054871	4.37026e-06	up	2.48598	2.48598	1.31382	FAM101A	Bos taurus family with sequence similarity 101, member A (FAM101A), mRNA [NM_001205617]	GCGTGGTCTCTCCACAAAGATGCTTTCTGATTAACAAAGAAATAACTTAAGGAATGACTG///ATAGACACATCTATTTTATCAGCACCTATTTGGGAAGACAACTTGGGCCTGGCTCTCGGA
A_73_101276|515194	0.000700874	1.91516e-05	up	2.48521	2.48521	1.31337	MRPL39	Bos taurus mitochondrial ribosomal protein L39 (MRPL39), mRNA [NM_001080730]	AATGGTAACTGAAGATCAAACTAAGCCTACAGAGAAGAGTGCATCTACCTAGTAACTTCC
A_73_P388156,A_73_104548,A_73_P253101|505727	0.00109062	6.35046e-05	up	2.48469	2.48469	1.31307	NOV	Bos taurus nephroblastoma overexpressed (NOV), mRNA [NM_001102382]	GTACCGATGCCCCAAACTTATCCTTGGGTCTTAGTTAGGCAAACTCATGAACAAGATATA///AGACTGCAAACTTAAATGTATACATCCTTCTATTGTCACCCTATGTGTTCAGCTTTTCTC///AGTGACTCAACTCTGAACTTCAAATTCTGAGATCTGATGAAACATATAGTTCTCCAACTT
A_73_P089046|518832	0.0163005	0.00516448	up	2.48462	2.48462	1.31303	SVOPL	Bos taurus SVOP like (SVOPL), mRNA [NM_001192500]	TCTATTACCATGGGATGCACGGCTTTATTCTTCCTGCTCCTCAATATTTGCACCTCAAGC
A_73_120710,A_73_P100726|281743	0.000468303	3.05511e-07	up	2.48458	2.48458	1.313	EBD	Bos taurus enteric beta-defensin (EBD), mRNA [NM_175703]	CTGTTTCACGCCCTCAGTAAAATGCTGCAGGTGGAGGTAAAAGAAGGAGAAGATGCGGCC///GACAGAAACTGCGGCCTTCGACAGAAAGTCTAAAATTTAAACCAGAATAAATTTTGTTCA
A_73_P040761|539222	0.00301613	0.00044614	up	2.48426	2.48426	1.31282	PBX3	Bos taurus PBX homeobox 3 (PBX3), mRNA [NM_001046453]	ATAATTTAAATGCTAATGGAGGCTGGCAGGACGCAACAACTCCATCTTCTGTGACTTCTC
A_73_P047516,A_73_108138|507203	0.00282553	0.000402281	up	2.48422	2.48422	1.3128	ANP32E	Bos taurus acidic nuclear phosphoprotein 32 family member E (ANP32E), mRNA [NM_001075306]	GGGCCTCTCATACTTGATGAAAGAAGAAATTCAGGATGAAGAAGATGATGATGACTATGT///GTGTGCAATAGAGTGATCACATCTTCTTTGTTTCTTCTTGTATGATAGCTATCCCTCCAG
A_73_P037661|529760	0.000655957	1.3714e-05	up	2.48307	2.48307	1.31213	ADORA2B	Bos taurus adenosine A2b receptor (ADORA2B), mRNA [NM_001075925]	GACCCCAAAGTGAAAATTTTACTAAGGTGGGTTATGTAACTGTGTTTCTGTATGAGGTGA
A_73_P308056,A_73_112059|615953	0.00105872	5.9923e-05	up	2.48272	2.48272	1.31192	CENPM	Bos taurus centromere protein M (CENPM), mRNA [NM_001038686]	AAGCTGGCCCACACCTACCGGAGCCCTCTGCTCTTCTGTGACCTAGAGATAGAAGACTTC///AACATCACTGAACTCATCCACCACTTTGATTTTGTAGATGAGGAAACTGACTCCAAACAG
A_73_106403	0.0109339	0.00304766	up	2.4798	2.4798	1.31022			TTAATCCTCACTGCCATTTTGTCTATGGGCTGATGTTTTAATATTGGAGTCATAATACAG
A_73_P422291,A_73_P042641,A_73_P405176|614673	0.00601028	0.00130105	up	2.47953	2.47953	1.31006	NUPR1	LB0242.CR_F23 GC_BGC-24 Bos taurus cDNA clone IMAGE:8631769 5', mRNA sequence [EH204295]///Bos taurus nuclear protein 1, transcriptional regulator (NUPR1), mRNA [NM_001114515]	ACCAAACACAAACAAAGCTTTAGAAGACGGGAGAGGGAGAGACAGACAGACAGACATTAT///AGAAAGAAGAAACCGGAGCTCCCCAGGGTGACGGTGACAATAAACAAAGTGTAGCAGCTG///TGAAGATGCCGTCCTAGACGAGTACGACCTCTACAGCCTGGCTCATTCTTACCCGGGAGT
A_73_P462686,A_73_100293,A_73_P255366|516303	0.00105484	5.92455e-05	up	2.47871	2.47871	1.30959	ERRFI1	Bos taurus ERBB receptor feedback inhibitor 1 (ERRFI1), mRNA [NM_001077930]	ACAGTCAGCTGTTGGGTTGAGAGTATCTGTGTGGAGATGTGTGTTGTGGGTTTCTTTTTT///GAAGGTTAAAACATGCTTTAGAAAAAGGCACTGATTTCTGCATCTTTGTGTACAGTATTG///TGAATAAACAAATACAACACAAGCTGGCCCTTGTGTTGCTGGGTCCCTCTTCAGTATTTC
A_73_P398711,A_73_P037296|513389	0.000648663	1.03164e-05	up	2.47625	2.47625	1.30816	DGKD	Bos taurus diacylglycerol kinase delta (DGKD), mRNA [NM_001035282]	AAGTGTGTAAGTTCAAGGCCCACAAGCGCTGCGCTGTGCGTGCGACCAGTAACTGCAAGT///CCACATCTGGGGTTGTAAATACAGTTGTTCTGTGTATAAATAAAACAAGCCTGTTTTTGA
A_73_P280561,A_73_P030076|515706	0.00303569	0.000450687	up	2.47292	2.47292	1.30621	TDRKH	Bos taurus tudor and KH domain containing (TDRKH), mRNA [NM_001105375]	GGAGCCAAAATAACCTGTGACAAAGAATCAGAAAGAACATTGCTACTATCAAGACTTATA///ACTGCTACCTGGAAAGCCAGAAATACTGGCTTAGATAACCCAGAATAAGGAAACAATAAA
A_73_P066681|540072	0.0399911	0.0164159	up	2.4728	2.4728	1.30614	RFWD3	ring finger and WD repeat domain 3 [Source:HGNC Symbol;Acc:HGNC:25539] [ENSBTAT00000005847]	ATAGTGGTAAACCCAGTGATGATGGCAGCTGATGAGCTGTAGATCCTTTCCTAATGCCAA
A_73_P138226	0.00382162	0.00065056	up	2.4688	2.4688	1.30381		Rep: Homeobox protein Mohawk - Homo sapiens (Human), partial (77%) [TC425262]	CAGTCTTGATATAAATTGTAGGACACTTTTTCATGTAACATAACATTTGGGGGTTGGGTT
A_73_108249|538986	0.00216246	0.00025068	up	2.467	2.467	1.30276	FIGNL1	Bos taurus fidgetin like 1 (FIGNL1), mRNA [NM_001206714]	GCGACCTAGTGTATCTCCTGAAGATTTAGAGCTTTATGAAAACTGGAACAGGACTTTTGG
A_73_P122681,A_73_119995,A_73_P041156|768320	0.0040814	0.000722119	up	2.46686	2.46686	1.30268	DEFB7	LB0172.CR_J15 GC_BGC-17 Bos taurus cDNA clone IMAGE:8121425, mRNA sequence [DT807753]///Bos taurus defensin beta 7 (DEFB7), mRNA [NM_001102362]	TCTGAGTTTAATCTTACCCTTGATATTTCCGGAAATGGGATGAAAATATGTAGGAAGGAA///TGCCGATCAGGTGCCCTGGACACAGGAGACAGATTGGCACCTGTTTAGCGCCCCAAATAA///CTGCGCCCTTCGACAGAACGTCTAAAATTTAAACCAGAATAAATTTTGTTCAGTTAAAGA
A_73_P083226|521431	0.00323259	0.000497812	up	2.46566	2.46566	1.30197	SCAI	Bos taurus suppressor of cancer cell invasion (SCAI), mRNA [NM_001192538]	TTAGCATCCATTCTGGATGTGCGAAACGTGTTCCTTGAGAATACCATAGACGACTATTAA
A_73_102314	0.00505307	0.000994301	up	2.4655	2.4655	1.30188		Rep: Baculoviral IAP repeat-containing protein 5 - Bos taurus (Bovine), complete [TC455727]	TGTGTGTGTGTGGAACAGGATTTTCATGTAAAGAGGAATTGGGACAAAGCCCTCAGCCAA
A_73_P354216	0.000747096	2.37544e-05	up	2.45184	2.45184	1.29386		Rep: PREDICTED: PHD finger protein 15 - Pan troglodytes, partial (24%) [TC413183]	CTTGAGGCTGCCACTCTGATGTGGTTTTATTTTTAATATAAAAAGTGTTGCGAATTCCAA
A_73_P087916,A_73_105168,A_73_P272036|519739	0.000838835	3.16364e-05	up	2.45106	2.45106	1.29341	GPAT3	Bos taurus 1-acylglycerol-3-phosphate O-acyltransferase 9 (AGPAT9), mRNA [NM_001192514]	GAATTACAGCAAAATGATTGTGGGCAATGGATCTCTCAAGTCGGAACTGGACTGAATGCC///TCAGAGTGTTATTTCTCTTCTGGGAACCATGTACAAAATGTGACACTGTCTTACGGTGAA///CTCTTCTGGGAACCATGTACAAAATGTGACACTGTCTTACGGTGAATATAAATAAATTCA
A_73_P039791,A_73_P487808,A_73_P260601|534900	0.00259295	0.000347358	up	2.45079	2.45079	1.29325	TUBA3E	Bos taurus tubulin, alpha 3e (TUBA3E), mRNA [NM_001038163]	AAGTTAGACCTCATGTACGCCAAGCGCGCCTTCGTGCACTGGTACGTGGGGGAGGGCATG///AGGAAGACGCGGCCAACAACTATGCCCGTGGCCACTACACCATCGGCAAGGAGATCGTCG///AGATGGTCAAGTGTGACCCTCGCCACGGCAAGTACATGGCCTGCTGCATGCTGTACCGGG
A_73_117679,A_73_P279546|521798	0.0167736	0.00536989	up	2.44942	2.44942	1.29244	DCST2	DC-STAMP domain containing 2 [Source:HGNC Symbol;Acc:HGNC:26562] [ENSBTAT00000014066]	TGGCCGGACGGTGTTCCTGCCTGGTTCCATTTATCAGCTACTTCAGCCAGCATCAGACCT///ACTTGCCAGTGTGGTCCAGGTGTTCTGCATCATCCCTGGCTATATCCAGACCTTCCTGCG
A_73_P090751|520938	0.0130933	0.00387677	up	2.44822	2.44822	1.29174	LOC520938	GB	AGTCTTTATCCTGACACCCTTCTCACTGATCATAGTGTCCTATGCCTGTATTCTTGTCAC
A_73_P059206|540969	0.00128298	8.95003e-05	up	2.44688	2.44688	1.29094	DNA2	Bos taurus DNA replication helicase/nuclease 2 (DNA2), mRNA [NM_001192802]	CTTCCATCAGGAGAACATGAAAGCCTTTTTCATCTATTGGGTGATTTCCAAAGAAAATAA
A_73_P493883|536048	0.00288035	0.000414579	up	2.44645	2.44645	1.29069	MAK	Bos taurus male germ cell associated kinase (MAK), mRNA [NM_001046415]	TTGCCCACAATGCTGATACGGGTAGGACTTTAAAAGTATTGAATAAACTTTATTTGCCAA
A_73_P240945,A_73_P262746,A_73_121412|534497	0.000699123	1.78141e-05	up	2.4457	2.4457	1.29024	PMP22	Bos taurus peripheral myelin protein 22 (PMP22), mRNA [NM_001101156]	TATAATACATAACAATGCACCGCCTTTATCACGCCCACATTTCCTTATGGTCGGAGCATC///GGGGGGTGGTTAGTGTTGATTGAAGATGTATATAATATCGACGGTTTATAAAACCTATTT///TAGATGTATATACGGGGCCCTTCTGATGCCAAGACTCCAGACCTTGTTTTTTCCCTCTTT
A_73_P062891,A_73_P377241|541284	0.00109178	6.37072e-05	up	2.44553	2.44553	1.29015	MBOAT1	Bos taurus membrane bound O-acyltransferase domain containing 1 (MBOAT1), mRNA [NM_001192857]	ATCAAACCACAAGCTCATAATCAAAGGTGGCCTCAGACTCTGAACTCTCTTAATAAAAAA///GATTATATAGCCTTCATTGAGGGGAGACACACACACATGAAGTTGCTGGAAGTGAACTGG
A_73_113023	0.033682	0.0131826	up	2.44536	2.44536	1.29005			GGTTTTGCATATTTCTTGTTAAACTTCTTCCTAAATAGTCAGTCATCTTTGTTGCTATTA
A_73_100620|541211	0.0191124	0.00635151	up	2.44512	2.44512	1.2899	DIXDC1	DIX domain containing 1 [Source:HGNC Symbol;Acc:HGNC:23695] [ENSBTAT00000040095]	ACTGTCAAGGAAGAGGTTTTCCACGATGATGATGCCATTCCTGGATGGGAAGGGAAAATT
A_73_107711	0.000512795	2.82863e-06	up	2.44367	2.44367	1.28905		Rep: Hexokinase-2 - Sus scrofa (Pig), partial (24%) [TC432931]	TCTCAAACCCTTGAGCACTCAGTCTAGTGAAGATGTTGTCATGTACAATAAAGAACTAGT
A_73_P045981,A_73_P438076|507901	0.000884096	3.78835e-05	up	2.44289	2.44289	1.28859	GTSE1	Bos taurus G2 and S-phase expressed 1 (GTSE1), mRNA [NM_001101890]	CTCCGGATGAGTCTGGATTTTTTGCATGTAAAATAGCAAGTGACCCATCTTTTAAGTTAA///TTACTTTTTCACAAAGTGTCACTGTAGAAGTCACCTTGGATGAAGCACAGCCCCCTGAAG
A_73_110355,A_73_P427021,A_73_P112056,A_73_P047046|286842	0.0012782	8.88174e-05	up	2.44197	2.44197	1.28804	BASP1	Bos taurus brain abundant membrane attached signal protein 1 (BASP1), mRNA [NM_174780]	AAAGTCTGCGTTCATTGCAGTTCCAGTTTTCTCTTCCATTCTGTGTCACAGACACCAACA///ATTTCTCATGACGAGTTAATGCATGTCCGTGGTTGGGTGCACCTGTAGTTCTGTTTATTG///GTCAAACCTGCCGAGACCCCGGCAGCTAATTCCGATCAAACCGTAGCAGTGAAAGAGTAA///TAATGCATGTCCGTGGTTGGGTGCACCTGTAGTTCTGTTTATTGGTCAGTGGAAATGAAA
A_73_102781	0.0345055	0.0135955	up	2.44184	2.44184	1.28797		Rep: Expressed protein - Cryptococcus neoformans (Filobasidiella neoformans), partial (4%) [TC406643]	CCTCAGCCATCTAATCCCCAAGCTTTCTCTCTGACTGGTTTTCTTTCCTTTGATTAAATG
A_73_121113,A_73_P459601|614348	0.000690961	1.69348e-05	up	2.44085	2.44085	1.28738	RGCC	Bos taurus regulator of cell cycle (RGCC), mRNA [NM_001102276]	GTTAGAGACTGACTTGGGTTACCTGCTTGCAGCGTATTAGAGCAGATGACTCATGCTAAT///GAGAAGTTTCAGAAAGCTCAGAGGATCTGATGAAATCAGCTACAGAATATGCTGCTGGAG
A_73_103407|100296588	0.0153112	0.00475953	up	2.43851	2.43851	1.286	C3H1orf162	PREDICTED: Bos taurus chromosome 3 open reading frame, human C1orf162, transcript variant 1 (C3H1orf162), mRNA [XM_002705653]	TCATCCATCACTTTCCATTTTAACAAATTTTGGACTACGACCAGACGAAACCACAGCTGG
A_73_119049	0.0405837	0.0167132	up	2.43808	2.43808	1.28574		RAD51 paralog C [Source:HGNC Symbol;Acc:HGNC:9820] [ENSBTAT00000020012]	TTGTTGCTACTGCATATTCATTGCAAACAGAAGGTTCATTGAATTCCCGGAAGCGATCAC
A_73_P307621,A_73_103360|509981	0.000912	4.05048e-05	up	2.43734	2.43734	1.2853	NIP7	Bos taurus NIP7, nucleolar pre-rRNA processing protein (NIP7), mRNA [NM_001192239]	ACATTGACTTAAAGCAAAATCGTCGCAAGGACTTGTGGCTGTGTGGAAGGGCCTAGTTTT///TGGAAGGGCCTAGTTTTGTTTCCTGTGTCTCTGTAAGCGCCACCGTCATGTTGAATTTTT
A_73_P491438	0.000960715	4.7129e-05	up	2.43579	2.43579	1.28439		Rep: Ferritin heavy chain - Trichosurus vulpecula (Brush-tailed possum), partial (67%) [TC440418]	AGAAGGCGGTCTGGCAGAGTACGCTTTTGACAAGCTCACCCTGGACACCAGTGACAAGGA
A_73_112967	0.00193617	0.000203634	up	2.43193	2.43193	1.2821		Rep: CLRN3 protein - Bos taurus (Bovine), complete [TC419569]	TCAAAATAGAAATGTCATTTTGTGGTGAGTTCTGAAAACCCCATCAGCTGACGCTCTGCT
A_73_P050391,A_73_P346001|508893	0.0055731	0.00115382	up	2.43036	2.43036	1.28117	TLE4	Bos taurus transducin like enhancer of split 4 (TLE4), mRNA [NM_001081583]	CTTCAGCTATCTACTTGGAAGATCATGGATAACCCTACTTAACAGTGAAAGGAATCTTTA///TTAACGAAAAATCTACTACTCCTGTGTCGAAGTCCAATACCCCTACTCCACGAACTGATG
A_73_113753,A_73_P165212|540105	0.00243535	0.000311324	up	2.42981	2.42981	1.28084	FMNL3	Bos taurus formin like 3 (FMNL3), mRNA [NM_001191506]	ATGGAGCTGATCCGGCGGGAATGCAGCATACATGACAACAGCGTCCTGCGCAACTTCCTT///GGCAGAGGGAGGAGAGGAGAAAGCAAGTATCCCTTCTTTTTTCCCCTTACTTTTTGAATC
A_73_104216|537926	0.00285733	0.000408655	up	2.429	2.429	1.28036	CEP78	centrosomal protein 78 [Source:HGNC Symbol;Acc:HGNC:25740] [ENSBTAT00000036653]	TGATTTTGAATTTCAAGAAAGCATCCATACTCTATCACGCCTGACATAGGTCTAAATCTT
A_73_115262,A_73_P269726,A_73_P269391|512427	0.000509628	1.94989e-06	up	2.42646	2.42646	1.27885	NASP	Bos taurus nuclear autoantigenic sperm protein (NASP), mRNA [NM_001038088]	ACTGCATGTTAAGAGAGGGAGCAGAGCCTGCCTCCCAGTGGAAAGTGTTTTTGTATATAA///TTGTGTTACTGATATTTCCCACCTTGTCAGAAAGAAGAGGAAACCAGAGGAAGAGAGCCC///GCCTCCCAGTGGAAAGTGTTTTTGTATATAATGTATTTTTTCACTTTTGGGGGATTCTTT
A_73_120172|616753	0.00248648	0.000322497	up	2.42451	2.42451	1.2777	CISH	Bos taurus cytokine inducible SH2 containing protein (CISH), mRNA [NM_001046586]	AGTTTAGTAGTCTTTTTATTTTCACTGCTTTTTCTGTAATGACAATAAAATTGTACCTTT
A_73_P492868	0.0203637	0.00690749	up	2.42426	2.42426	1.27754		GB	GGAAACTCAAAGCCCACACGTACATGTGTCTCCCCTATTTGTGCTGTGCTCATTCTATAT
A_73_121007	0.00356166	0.000581772	up	2.42367	2.42367	1.2772		Rep: Predicted integral membrane protein - Alteromonas macleodii 'Deep ecotype', partial (7%) [TC442762]	GAATGCCACATGCTCACAGGATAACAATGTGTTCTCATTAAAAAATACATCCCACTGCGA
A_73_108466	0.00204988	0.000228335	up	2.42114	2.42114	1.27568		Hw_FAT_19_050524_C11 Bos taurus CF-24-HW fat cDNA library Bos taurus cDNA, mRNA sequence [DV777378]	TCCTCTCGTCACCAGTTTCTCTGCTGCATGAATTTGTGTTTTGCTGTAAGACAGCATGAG
A_73_P227212,A_73_103805,A_73_P167577,A_73_P162642,A_73_P292142|512584	0.000987808	5.0037e-05	up	2.41837	2.41837	1.27403	SNRPA1	Bos taurus small nuclear ribonucleoprotein polypeptide A' (SNRPA1), mRNA [NM_001098948]///Hw_Fat_34_050805_H02 Bos taurus CF-24-HW fat cDNA library Bos taurus cDNA, mRNA sequence [DV779750]	TCTGCCTTGTCTGACAGAACTCATTCTCACCAATAACAGTCTTGTGGAACTGGGTGATCT///CAGATTTTGAAATCTAAAACCCAGTTTTCTACCAGTAGTACAAATAAAGGACACTCTCTG///CCGACAATGAAATCAGGAAACTGGATGGTTTTCCTTTGTTGAGAAGACTAAAAACATTAT///CCGGAAAGGGGGAAAAGGGGAAATTTTGGAAACCGGTAAAATTTTTTGTTTAAAAATTCT///CCTGTAACCAATAAGAAGCATTACAGACTCTATGTGATTTATAAAGTTCCACAAGTCAGA
A_73_119751	0.000734176	2.18226e-05	up	2.41582	2.41582	1.27251		Rep: Atherin - Homo sapiens (Human), partial (41%) [TC424121]	CCTTTTCTTTCTGTTCATTGTCGCTCCAGCTGGCCGTATTGCTTTTTAATATTGCACCGA
A_73_P092281,A_73_120379,A_73_P104981,A_73_P104976|505940	0.000509628	1.18656e-06	up	2.41522	2.41522	1.27215	ARHGEF2	Bos taurus Rho/Rac guanine nucleotide exchange factor (GEF) 2 (ARHGEF2), mRNA [NM_001098881]///Rep: MGC152523 protein - Bos taurus (Bovine), complete [TC428068]	TAGTCCACGAGATTTCACCCGAATGCAGGACATCCCGGAAGAGACTGAGAGCCGAGATGG///TGTTGTCTGTGATACTCACAAGGATAAAAATGAAGGGACACTTAGGTTCCAGCAGCTGTT///CGTAGGCAGTGGGCCATTATTTGGATTGTATTGTCTTTTACCTTCATTTTCTAAAAATGA///TATGCACAGGTTCAGCATCCATGGATTCAACCAAGCATGGGTCAAAAATACTCGAAAAAA
A_73_118705|510798	0.000877613	3.65182e-05	up	2.41473	2.41473	1.27186	LOC510798	Rep: LOC510798 protein - Bos taurus (Bovine), complete [TC397026]	TTACAGGAGACCAAGAGAAAAACAAGACAGTTAACATTTTTCTTGGTTGACCTATACATC
A_73_119169,A_73_P107696|539542	0.00510782	0.00101083	up	2.41472	2.41472	1.27185	HHEX	Bos taurus hematopoietically expressed homeobox (HHEX), mRNA [NM_001105424]	TTGCCTTAAATCCAGAGCTATCTCTGAGTTCTTGTCTGGGGGATGTAGGTATCTTTTTGT///AACTGGAAAGTTTGGACAATTCTTGCGACCAGAGGCAAGACTTGCCTAGTGACCAGAATA
A_73_107474,A_73_P059651|617866	0.00100647	5.36281e-05	up	2.41401	2.41401	1.27143	CENPU	PREDICTED: Bos taurus MLF1 interacting protein (MLF1IP), mRNA [XM_870192]	TTCTAGTTAACACCAAGTACTAAGTTTTTAAATGTTTTACAGTGTTGACACCTCGTCAGC///GTTCAGACTGTATGTATGACCTTGAGCTTGTCACCAGAATTTAATATTGCTTTGTCATTA
A_73_103215	0.00378783	0.000642933	up	2.41082	2.41082	1.26953		Rep: Pseudouridylate synthase 7 homolog - Bos taurus (Bovine), partial (11%) [TC479685]	CTGGTGTTCTGTGTTTATCCACCTTTTCTGTGCTTAGGCCACACCACGCCTTCCTTTTTT
A_73_101054,A_73_P377061,A_73_P440986|512531	0.00533127	0.00108042	up	2.40987	2.40987	1.26895	MARS	Bos taurus methionyl-tRNA synthetase (MARS), mRNA [NM_001038091]	ACTTATCATAGAAAGTCACTTTAATGGATATGGACAATAATAAATAAATGTACAATCTAA///TGTGACAAGTGTGGCAAGCTCATTAATGCCATTGAGCTCAAGAAGCCTCAGTGTAAAGTC///ATGTTTGTGTCCAAGTTTTTTGGGGGTTTTGTGCCTGAGATGGTGCTCACCTCTGATGAT
A_73_105875	0.00131635	9.37753e-05	up	2.40932	2.40932	1.26863			GAAATTTAGTGACGGAAGCAGTTGTAGCCTTGAATGTGATTTCTTTAATGTTTCATGTTG
A_73_112709|506759	0.00542976	0.00111195	up	2.40877	2.40877	1.2683	IFI16	PREDICTED: Bos taurus interferon, gamma-inducible protein 16, transcript variant 2 (IFI16), mRNA [XM_863928]	TATATGGAAACCTGCTCAGAGCTGTTCTTCTAAAAACCTGGATGTCATTAATATTGATGT
A_73_P389801	0.000832465	3.09136e-05	up	2.4076	2.4076	1.26759		Rep: LOC201725 protein - Homo sapiens (Human), complete [TC479855]	CTACATAATGCTCTGTTATGTATGTTTCAACTGTCTTGAAGTCTATGGTGTATCCTTGTA
A_73_P116016,A_73_P435481,A_73_P280791|533634	0.00212263	0.000241377	up	2.40613	2.40613	1.26672	OSBPL6	oxysterol binding protein like 6 [Source:HGNC Symbol;Acc:HGNC:16388] [ENSBTAT00000019160]	AAACGGGAAACGTAGAGCTAGCCGACATATCACGCTCTGAATGAATAAATAACTATGCAC///CCAGTAACATTAACCTGTGGAATATATTGAGAAACAACATTGGTAAAGACCTGTCTAAAG///GGTCCATGGAAGCATCGATGTGGGACTCTCTGTCATGTCAATTAAAAAGAAAGCTCGGAA
A_73_P488353	0.0483448	0.0206815	up	2.4045	2.4045	1.26574			TTGTTCCCTCACTGTGGGAATCTCTAATGTGAAGATGAATTCTATGACAAAGTCTTTTTT
A_73_P071871|784034	0.000695392	1.74139e-05	up	2.40426	2.40426	1.26559	C16H1orf112	chromosome 1 open reading frame 112 [Source:HGNC Symbol;Acc:HGNC:25565] [ENSBTAT00000019683]	GGTGAAGAGTTAGTGGACTAGACCATTTTGTCAACTAGGTAAATGAGTTGAATATGATAT
A_73_103946|403090	0.0276306	0.010261	up	2.4017	2.4017	1.26406	LAP	Bos taurus lingual antimicrobial peptide (LAP), mRNA [NM_203435]	GGAAGTAAAAGAAGGCGAAGACGTGGCCAGACTGGATGCGGAGTCAGAAACTGTGCCCTT
A_73_P435111,A_73_P263871,A_73_P036201|506194	0.00409796	0.000726453	up	2.39756	2.39756	1.26157	TACC3	Bos taurus transforming acidic coiled-coil containing protein 3 (TACC3), mRNA [NM_001100305]	ATGGAAAAGTCGTTCTCCGACCTTTTCAAGCGGTTTGAGAAACAGAAGGAGGTGATCGAA///AATCAACAGTTCACCAAGGAAACAGACACCAAAACGACCCATGGAATTCTCCAGAAGCCA///GTGTGTATGTGTGTGTGTCTGTCTGTCTGTCTAGGTTTTTCTTCTCTATTGACGTCTTTT
A_73_P399086,A_73_106795|540206	0.025243	0.00913902	up	2.39751	2.39751	1.26154	MASTL	Bos taurus microtubule associated serine/threonine kinase like (MASTL), mRNA [NM_001113765]	TGAAGCCAGACAATATGCTTATTTCTAATGAAGGTCATATTAAACTAACAGATTTCGGCC///TACCCCAACCAGATGACGAAACAGATACATCTTATTTTGAAGCCAGGAATAATGCTCAGC
A_73_101604	0.00143644	0.00011267	up	2.39442	2.39442	1.25968			GCCCATGTCTGCTAGAGTAGGCCGAATATGTATTTCATGGACTCTATAAGAACATCCAAT
A_73_P034111|505618	0.000852758	3.36425e-05	up	2.39243	2.39243	1.25848	RNASEH2C	Bos taurus ribonuclease H2 subunit C (RNASEH2C), mRNA [NM_001045921]	AAACCACAGGAAACCTCTTCAGTGTGAAGCCAGAGTCCTTCACCCAATAAAGGAGCTTTT
A_73_P375496	0.0142541	0.00432897	up	2.38884	2.38884	1.25631		Rep: Uncharacterized protein INCENP - Homo sapiens (Human), partial (23%) [TC458403]	TTGAATGTTGAGGTGCCCCAGAAAGTCAGCCCAGAAGAGGAGGAACCCAGCAAGGAAGCT
A_73_119970	0.00287488	0.000412272	up	2.38692	2.38692	1.25515		PREDICTED: Bos taurus DIX domain containing 1 (DIXDC1), transcript variant X4, mRNA [XM_010812389]	AGGCTTCTGATTATCAAAGTGATAACCAGTTTTAACTGCCTGTATGTACCAGATTTGTGA
A_73_119395	0.0180249	0.00588991	up	2.38467	2.38467	1.25379		Rep: Girdin - Homo sapiens (Human), partial (8%) [TC434982]	GACTGTGCCAATTTTCTTATTTTGCAAAGTGCAGTCTTCCTGTAACCCATGGAGCTGGAA
A_73_109950,A_73_P488193,A_73_P203242|508788	0.00143876	0.000113584	up	2.38463	2.38463	1.25376	SNRPD1	Bos taurus small nuclear ribonucleoprotein D1 polypeptide (SNRPD1), mRNA [NM_001035065]	CTGTTTCACAGGGAAGAATGTTCAAGTTTTTTGTACAGGCTTTGTTTGTTTGTAGCAGTT///AGCTTACCTCTGGATACACTACTCGTGGATGTGGAACCAAAGGTGAAGTCTAAGAAAAGG///CACAAGTCCACGGAACAATCACAGGTGTAGATGTCAGTATGAACACACATCTTAAAGCAG
A_73_P359481,A_73_115963,A_73_P345456|516513	0.0193714	0.00646624	up	2.37851	2.37851	1.25006	MYO1G	myosin IG [Source:HGNC Symbol;Acc:HGNC:13880] [ENSBTAT00000008366]	TGAGGATGAGGAGCTGCAAGAACTACACCTTCAGAGAAACCCTGCAGTGTATAATTTCAC///CTGAGAGGTTCTCCACCTGCACCCACACCAGTGACAGATCGCAGTCTCGCTGTGCAATAA///ATTGATAAGAACAGAGACTTCCTCTTCCAGGACTTCAAGCGTCTGCTGTACAACAGCAAG
A_73_P079911|516557	0.00133108	9.63507e-05	up	2.37774	2.37774	1.24959	SAV1	Bos taurus salvador family WW domain containing protein 1 (SAV1), mRNA [NM_001191362]	CTGGTACCTGCAAATCCTTACCATACTGCAGAAATTCCTGACTGGCTTCAGGTTTATGCT
A_73_P045641,A_73_P419076|510267	0.00152157	0.000125254	up	2.3748	2.3748	1.24781	TMPO	Bos taurus thymopoietin (TMPO), mRNA [NM_001098005]	GAGGCGGGCATTATGATTTTTGTTTACTCTTGAAATGGTTAATTTTATCCTTGTGGTTGA///CTGAATTATCTTCTGTTACCAAAAACAAATTTTGCCAAGGTTTTTTGCCCTGTATTTCCC
A_73_105672	0.0260343	0.00952456	up	2.37452	2.37452	1.24764		Rep: Calcium/calmodulin-dependent protein kinase kinase 1 - Homo sapiens (Human), partial (5%) [TC440668]	CTATGAGTGTGTATGAGCGTGTCCTCCTGCATGCATGTTCTGACCTCTGAGGTCCCTCTG
A_73_P404531,A_73_118758,A_73_P101236|281408	0.00098048	4.94419e-05	up	2.37271	2.37271	1.24653	PLAU	Bos taurus plasminogen activator, urokinase (PLAU), mRNA [NM_174147]	GAAATTCCAAGGGGAACACTGTGAGATAGATACATCGAAAACCTGCTATCAGGGGAATGG///CTGAGTTCATCCAATCCTCACTGAGTGAGGCAAGGACCACTCCTGTACACTGAATATTTA///AAATTGGCCTAAAGCAGTTTGTCCAGTTCTGCATGGTGCAGGACTGCTCTGTTGGAAAAA
A_73_P151706	0.00585569	0.00124865	up	2.37005	2.37005	1.24492		Rep: PHD finger protein 19 - Homo sapiens (Human), partial (12%) [TC462683]	AACTGACTCACTTGATTGGAAAGAAGTGCCTTGACTGGGGCGAGGGGTGTGCCAGATGGG
A_73_P489668	0.0078818	0.0019242	up	2.36975	2.36975	1.24474		GB	CAGGTGCTGGGGCGCTGGCGACCCCGCCAGGCGTCGGGTCAGGAGGGTCTGTCTGTGTGA
A_73_P086911|100139803	0.0182106	0.00597062	up	2.36846	2.36846	1.24395	TMEFF1	Bos taurus transmembrane protein with EGF-like and two follistatin-like domains 1 (TMEFF1), mRNA [NM_001205476]	CGACGACAGAAGCAAAACCTAGGTCATTTTACTTCAGATACGTCATCCAGAATGGTTTGA
A_73_109914,A_73_P412076|512027	0.00125224	8.39242e-05	up	2.36831	2.36831	1.24386	SIT1	Bos taurus signaling threshold regulating transmembrane adaptor 1 (SIT1), mRNA [NM_001206418]	TGGCAGAACACCAGTCTCCATCCTGCCGTCTCTGTCGTGTGCCAAAGTTTTTAAATAAAA///ACTGTTTCCCAACCACCCCCTGAAGACAGGCAGCCCTTTCTCAGTCACAGGACTGATGGT
A_73_108215,A_73_P388626,A_73_P396146|510932	0.000655957	1.38388e-05	up	2.36662	2.36662	1.24283	SLC29A1	Bos taurus solute carrier family 29 member 1 (Augustine blood group) (SLC29A1), mRNA [NM_001034398]	CGTGTTCCTACCCATCATGAACCCTGTACATTTGCCATTTTACTGCCTTTTTTATACTCA///TTTCAATGTCTTTGACTGGCTGGGCCGGAGCCTCACAGCCATCACTATGTGGCCTGGGAA///TTCATGACAGCCACTAAGTATTTCACAAACCGCCTGGACATGTCCCAGAATATGTCCTTG
A_73_112690|281904	0.000509628	1.28401e-06	up	2.36658	2.36658	1.2428	LOXL4	Bos taurus lysyl oxidase like 4 (LOXL4), mRNA [NM_174384]	ATCTTCACAGGTCTGACGCTCTCATGCCAATAAAGGTTGCTCACTATGGACTGCTACAAA
A_73_112669,A_73_P466673,A_73_P252296|541071	0.000699123	1.80337e-05	up	2.3664	2.3664	1.2427	NCOA7	Rep: MGC151725 protein - Bos taurus (Bovine), complete [TC399001]///Rep: MGC151725 protein - Bos taurus (Bovine), partial (16%) [TC397303]	ACATGCGTGGCCCTTCATTTATGGATACTGAGTGTATGTAATGCAGTGCTAGCCCAATAT///CCTGGATTTAGAACCCTGCTGTTGAAAAGAAATGTTTTGCTTCTTATAAAATCTCTTGTG///GATTGTTTAGGGTGATCTGTATATGTATGTGCTGCTTAATGTCCATATATATACACACAC
A_73_100307|616242	0.00110162	6.48434e-05	up	2.35969	2.35969	1.23859	FEN1	Bos taurus flap structure-specific endonuclease 1 (FEN1), mRNA [NM_001035113]	GAGTGGTTCTCACGGCCTTCCTGAAGCATTTGAGTTGAAACTTTGGGATAAGATGCTGTT
A_73_P169012,A_73_117632|777788	0.000655957	1.2911e-05	up	2.35826	2.35826	1.23772	DDIT3	Bos taurus DNA damage inducible transcript 3 (DDIT3), mRNA [NM_001078163]	GCTTAGGGTCGACGATAGAAAAGGGTCTTAGCGTGTATATAGATTGTACATTTATTTATT///TCTCCAGAGTCCAGTCAGAGCTCCCTGGCTCAGGAGGAAGAAGAGGAAGACCAAGGAAGA
A_73_P508008	0.00269285	0.000371399	up	2.35821	2.35821	1.23769		PREDICTED: Bos taurus teashirt zinc finger homeobox 3 (TSHZ3), mRNA [XM_015467408]	CCTGTTTTGTTGTTGACATGAACCACATTATGTGACTCTTCATATAACCCTCTTTTCTAC
A_73_107191|514162	0.000655957	1.25229e-05	up	2.35714	2.35714	1.23704	BORA	Bos taurus bora, aurora kinase A activator (BORA), mRNA [NM_001205779]	CCTGAATGTGAAAAATCAAGGGCTTAATTCAGTGACACAGAAACAACAGAAAAGCTCCTG
A_73_121402,A_73_P444431,A_73_P090666|506240	0.00585569	0.00124848	up	2.35621	2.35621	1.23647	PRIM1	Bos taurus primase (DNA) subunit 1 (PRIM1), mRNA [NM_001145865]	ATTCGGGAAACCACCAAAGGAAAATGTTCAGATTCCTGGAAGGAGCAATAATGGGAGGAT///CAGATTCCTGGAAGGAGCAATAATGGGAGGATATAAGTGAATGCAGATTAATCTGGAAAA///AAGGGTGGTCAAGATGTTAAAAAGAAAGTTCACCTAAGTGAAAAAATTCACCCTTTTGTC
A_73_P149791,A_73_120415,A_73_P274186|614103	0.000509628	1.95293e-06	up	2.35414	2.35414	1.2352	DCTPP1	CR454741 Normalized and Subtracted bovine embryonic and extraembryonic tissues (bcaz [CR454741]///Bos taurus dCTP pyrophosphatase 1 (DCTPP1), mRNA [NM_001038202]	ATTCTAAATCTTTCCTAAAAGGTCATGGAACTGGCGCTACACTTCTTGAGGTCCAAGGCC///GTCATGGACCTGGCGCTACACTTCTTGAGGTCTAAGGCCCCAGAACCTCCAGAAGATAGC///TCAGGTCTCAACCTAGAAACATGGGCACAGAACCTGCAGCTCAGCATGGCCTCTGAGCAG
A_73_106555|541125	0.000609441	7.08266e-06	up	2.35112	2.35112	1.23335	ELK3	Bos taurus ELK3, ETS-domain protein (SRF accessory protein 2) (ELK3), mRNA [NM_001081542]	TTTTTGGCTTTCAACTGTATGAGAATTGCCTTAGAACCTCTTTTGAACTGAAATTCAGTG
A_73_P491668|100138344	0.00630871	0.0013968	up	2.34874	2.34874	1.23189	FAM180B	Bos taurus family with sequence similarity 180 member B (FAM180B), mRNA [NM_001302936]	TCTTAGCCCTTGGGACTTTGAACATCTGCTCCTCACAGGCGTGTCCTGTGTCTACCGGCT
A_73_121440,A_73_P108921,A_73_P102766,A_73_P103401|407998	0.00258881	0.000345738	up	2.34487	2.34487	1.22951	F11	Bos taurus coagulation factor XI (F11), mRNA [NM_001008665]///Rep: Coagulation factor XI precursor (EC 3.4.21.27) (Plasma thromboplastin antecedent) (PTA) (FXI) [Contains: Coagulation factor XIa heavy chain; Coagulation factor XIa light chain] - Bos taurus (Bovine), partial (60%) [TC394151]	TGGGTAGAGACAAGCTATGAATAAGTGAGTGTGAATGTGGACTCCAGAATTTCTGTAAGG///GGAACTCTTTTGGGAAGAAAGAACTTAACTGAATTTGATGGCAGGTTTCAGAATAATCAA///TTGATGACCAATGAAGAATGCCAGGCAGGTTACAGAGAGCACAGAATAACCAGCAAGATG///GCCTTCAGATTTCCTGCGAGTGTTTGGAGTATTTATGAATATTAGCAAAAGTTACAGTAA
A_73_116846,A_73_P066506|618617	0.000629314	9.43744e-06	up	2.34089	2.34089	1.22706	UBALD2	PREDICTED: Bos taurus family with sequence similarity 100, member B (FAM100B), mRNA [XM_870950]///UBA like domain containing 2 [Source:HGNC Symbol;Acc:HGNC:28438] [ENSBTAT00000018321]	GGAGTTCCCAAATCAAATCATCTCACCAGGGTGAAATTTTAATTTAAAACTTAAAAGAGA///ACGTTTTTCCAAGAAACCAACATTCCCAACGGTCACCACCACCACCAGATGATGTGTACC
A_73_119711|617142	0.000904753	3.98985e-05	up	2.34063	2.34063	1.2269	HSF2BP	Bos taurus heat shock transcription factor 2 binding protein (HSF2BP), mRNA [NM_001035493]	CCAGTTCACGTTTATCTTTCAACCTTTTGGTGAACCTATTATTTCAGATGACATTGGACA
A_73_P464881,A_73_121406,A_73_P034521|408010	0.000509628	2.2556e-06	up	2.3399	2.3399	1.22645	GARS	Bos taurus glycyl-tRNA synthetase (GARS), mRNA [NM_001097566]	ACTGATGAGATTGGTGTGGCTTTCGGCATAACCATTGACTTCGATACAGTGAACAAGACC///TTGATGTCTGATAAGAAGTGTTCTGCTGAGAAGAAATCAGAGATGGAAAGTGTCTTGGCC///GAGGCAATCGAAGAATGAGAACAGTTTTGGCAACTTATGACCATTTGCTCTAATAAAAGA
A_73_P033426|520564	0.00178925	0.000174059	up	2.33981	2.33981	1.22639	LITAF	Bos taurus lipopolysaccharide induced TNF factor (LITAF), mRNA [NM_001046252]	GCACAAGGAATGCATGTGAATAATACTGTGTAGAAATCAAAGCCTAGACATTGATCAAAA
A_73_108878|512417	0.0310385	0.0118928	up	2.33974	2.33974	1.22635	SLC22A15	Bos taurus solute carrier family 22 member 15 (SLC22A15), mRNA [NM_001193093]	GAGCGAGAGTGATGAAGAGGAAGAGTTTTACGATGCTGATGAGGAGACTCAGATGATCAA
A_73_P056746,A_73_107155,A_73_P060026,A_73_P203406,A_73_P486833,A_73_P189542,A_73_P082681|507912	0.000783216	2.69725e-05	up	2.33715	2.33715	1.22475	RPA2	Bos taurus replication protein A2 (RPA2), mRNA [NM_001045984]	GAGGAACACATCTATTCCACCGTGGATGATGATCATTTTAAATCCACAGACGTAGAATAA///CTGGCTTCCTGGGGCAGAGGAGAGAAAGAAATGTGTGTTGTACAAAATCAGTACGTTCAT///AACCAACTCCAACACATGCCTGTAGCCTCAATCAAGCTAGCTGTGGATTTTCTAAGCAAC///AAGGATTGAACTTTCAGGATCTCAAGAACCAACTCCAACACATGTCCGTAGCCTCAATCA///TGAAACTTACTACTACTCTCCTGTGTTTTTGATGGACTTCCCTGGTAGCTCAGACGGTAA///TTGTCATAGTAGCTGCCAAAGTGTGTTTTTATAAACATGGGGTTCTAGAGCGCTGGCTTC///AACGAGGGACACATCTATTCC…
A_73_116297	0.000955479	4.62984e-05	up	2.33188	2.33188	1.22149		Rep: EH-domain containing 4 - Mus musculus (Mouse), complete [TC448711]	TTTTTTCCAGGTAAACATGGGCCGAATTTAAGTGTACCAGGCGACATGTTAATTAGCCAA
A_73_P396941,A_73_108919|617703	0.00129764	9.15101e-05	up	2.3315	2.3315	1.22126	UBE2S	Bos taurus ubiquitin conjugating enzyme E2 S (UBE2S), mRNA [NM_001076472]	AAGATCTTCCACCCGAATGTGGGCGCCAATGGCGAGATCTGCGTCAATGTGCTCAAGAGG///TAAATTATGGCTGGGGTGGGGGAGGGCACGAGGGCACTGGGACCTGGATTTGTTTTTCTA
A_73_100576|524808	0.00314069	0.000474187	up	2.3276	2.3276	1.21884	HIST1H2AC	GB	ATGTCTGGGCGAGGGAAGCAAGGAGGAAAAACCCGAGCAAAAGCGAAGACCCGCTCTTCG
A_73_P370971,A_73_108517|767978	0.00151448	0.000124324	up	2.32323	2.32323	1.21613	NCAPH2	Bos taurus non-SMC condensin II complex subunit H2 (NCAPH2), mRNA [NM_001077043]	AGACATGGAGGTTCTGTACTGGAAGCACGTGAAGGAGCAGCTGGAGACGCTCCGGAAGAT///GGTTGGGCTTTACAGCTTGTCCCCCACGGACACCGGGTGTGCGTCTGCTCAGTCTGCTTT
A_73_P392836,A_73_101663|535171	0.000609441	6.63877e-06	up	2.32284	2.32284	1.21589	MPP6	membrane palmitoylated protein 6 [Source:HGNC Symbol;Acc:HGNC:18167] [ENSBTAT00000020351]	TATACTCAAAGAGCCTCACTTCCAGTCACTCTTGGAGGCCCATGATATTGTGGCATCAAA///CAGGGTCTGCTTCATGTGGGAGATATCATTAAAGAAGTCAATGGCCATGAAGTTGGAAAC
A_73_P292471,A_73_P042563,A_73_P071611,A_73_P154537,A_73_P448246,A_73_P202982|282691	0.00711601	0.00166445	up	2.32074	2.32074	1.21459	HMGB1	Bos taurus high mobility group box 1 (HMGB1), mRNA [NM_176612]///Hw_liver_44_050806_C11 Bos taurus CF-24-HW liver cDNA library Bos taurus cDNA, mRNA sequence [DV789388]	CTGCGGATGATAAGCAGCCTTATGAGAAGAAGGCTGCTAAGCTGAAGGAAAAGTATGAAA///TGTCTCTGATGCAGCTTATACGAATAATTGTTGTTCTGTTAACTGAATTCCACTCTGTAA///TCTGATGCAGCTTATACGAATAATTGTTGTTCTGTTAACTGAATACCACTCTGTAATTGC///AAGCGGGTTCTGGGTGGGGCCACGGCAAAAATTATTTTAATTTGGGGAAGGGGATTTTTT///GCCTTATGAGAAGAAGGCTGCTAAGCTGAAGGAAAAAGTATGAAAAGGATATTGCCGCAT///AAAGTATGAAAAGGATATTGCCGCATACCGAGCTAAAGGGAAGCCTGATGCAGCAAAAAA
A_73_P064141,A_73_P167202|518030	0.00782798	0.00190218	up	2.31931	2.31931	1.2137	TAF4B	Bos taurus TATA-box binding protein associated factor 4b (TAF4B), mRNA [NM_001205844]	AGTAGGGGAGACCATTGTTTACAGTTATAAACTTTTACTAAGTCGTGCTTATATATCCCA///TGAGCACTGCAATACCTACCAGTCAGTTTTCTCAAGCTTCCATTCTAAAGCAAGTTACCC
A_73_111579|783596	0.021962	0.00761829	up	2.31921	2.31921	1.21364	KPNA5	karyopherin subunit alpha 5 [Source:HGNC Symbol;Acc:HGNC:6398] [ENSBTAT00000019262]	CCCCAGTATTGTACCCCAAGTGGATGAAAATCAGCAACAGTTTGTATTTCAGCAGCAGGA
A_73_103414,A_73_P030691|507731	0.000808134	2.8818e-05	up	2.31817	2.31817	1.21299	CDC25C	Bos taurus cell division cycle 25C (CDC25C), mRNA [NM_001097996]	TTGATGAAACTGGTCATTTGGAGTCTACAGGACCTGAGCAAGTACGGTTAGCTGGAATGA///GTGATTGTGATGCATGTCAAGGCTTGAGAACTACAGCTCTGGAATTAAAGAAAACCTTTT
A_73_P063916	0.00530619	0.00107089	up	2.31521	2.31521	1.21114		minichromosome maintenance complex component 2 [Source:HGNC Symbol;Acc:HGNC:6944] [ENSBTAT00000019121]	TGTTTGTTTATTCTGCTCTGTCTTCTGGGGACTCATCTTCTAGGGCTGCATTTTCAGCAC
A_73_P192542,A_73_P049681|528386	0.0316007	0.0121701	up	2.3144	2.3144	1.21064	CAVIN4	Bos taurus muscle related coiled-coil protein (MURC), mRNA [NM_001103264]	ATCTTGGGTTTGAGTTGGGTCTTAAAACATTTCCTGGAAAATTCTTCTCTGATTATCTTC///CATTTCCTCTTCACCATGCGTGAATACGTAAAATAGTGAATTGTTCCTCTCATTATCTTT
A_73_P059486|518907	0.0168367	0.00539715	up	2.31369	2.31369	1.2102	KBTBD11	kelch repeat and BTB domain containing 11 [Source:HGNC Symbol;Acc:HGNC:29104] [ENSBTAT00000024334]	ATCTACGTGTCCGGGGGCTCACTTTTCTACCGCCTGCTCAAGTATGACCCGCGGCGTGAC
A_73_109284|512715	0.00126584	8.70999e-05	up	2.31321	2.31321	1.20989	TUBE1	Bos taurus tubulin epsilon 1 (TUBE1), mRNA [NM_001101962]	AACGTCAAACATTTGTCTTCCAAAACAGTCTTGTTTTCTAAAATTAAGAGAACAGAGCGC
A_73_P221982|100336967	0.0169578	0.00545145	up	2.31246	2.31246	1.20943	DOK6	docking protein 6 [Source:HGNC Symbol;Acc:HGNC:28301] [ENSBTAT00000064953]	TTCAAACAAGGGAAGGAGAAATGATCTATCAGAAGGTCCATTCTGCGACACTGGCCATAG
A_73_111084|615440	0.00179714	0.000176638	up	2.30636	2.30636	1.20562	NDUFAF4	Bos taurus NADH:ubiquinone oxidoreductase complex assembly factor 4 (NDUFAF4), mRNA [NM_001083516]	CCGGAAGGCAAGAAAGCAATAGAATCAAAATGAAGAGAATCTTGACAGGACTTTTCCTGT
A_73_P055206|786490	0.0106412	0.00292988	up	2.30417	2.30417	1.20425	EMP1	epithelial membrane protein 1 [Source:HGNC Symbol;Acc:HGNC:3333] [ENSBTAT00000050559]	TCGGCATCCTTTATCTGGTCCTGAGAAAGAAATAAGGCTGAACACATTTACTGGGGACCT
A_73_P454051,A_73_102000|616613	0.0006265	8.52499e-06	up	2.30293	2.30293	1.20347	FAM216A	Bos taurus family with sequence similarity 216 member A (FAM216A), mRNA [NM_001035480]	AGGAGATGCCCAACCACGGTCCAGTGTCCGACTGGACGGAATGCAGTTCTTCCGCAGAGC///ATGTGCCAAAGGTGGGGGAAGGGATTGTGAATTGTGTCCTCTCTCTACATTTAAGACAGA
A_73_P050131,A_73_P259596,A_73_P404441|520174	0.000973086	4.86552e-05	up	2.29977	2.29977	1.20149	NUP43	Bos taurus nucleoporin 43 (NUP43), mRNA [NM_001103096]	GCAAAAGAAAGTACATTTGAATAGTGTCACATTTTCTATCAGTTGATGAGTTCTGCCAGA///AGTTCACTTTCACCCATCCAACCCAGATCATCTGTTCACTTGTTCTGAAGATGGATCTCT///TGCTGAATTGGACATTGTGCAATAAAATAGGATTTGACATTGGTAAGTGAGCCAGCTTTC
A_73_113665	0.0361612	0.0144263	up	2.29813	2.29813	1.20046			TCCTTCAGGCCACTCTGAACGTGAAGAGCGAACAAATAATTCAGCCCAGCAAATCTGTAT
A_73_101183|541233	0.0056403	0.00117696	up	2.29768	2.29768	1.20018	RCOR2	Bos taurus REST corepressor 2 (RCOR2), mRNA [NM_001206075]	TCCACCAGCCTGGAGTAAGGAGGGTTGGGAACATATGCAGACATGGGTTTATTTTTCAAT
A_73_P382501,A_73_119225,A_73_P251636|518050	0.000750779	2.43381e-05	up	2.29654	2.29654	1.19946	ANXA3	Bos taurus annexin A3 (ANXA3), mRNA [NM_001035325]	TACAAGAAGAGTCTTGGAGATGAGATTAGTTCTGAAACATCTGGTGATTTCCGGAAAGCT///ATACTACCCACATTGCATTTCTGCTTTGGAAGTGAGAATCGTTGTATCGTTCTAAAGCAC///ATAGCATAAAAGGAGAATTGTCTGGCCATTTTGAAGACTTACTGCTGGCCATAGTTCGTT
A_73_P254081,A_73_P288306,A_73_101506,A_73_P051741|540329	0.00130813	9.28473e-05	up	2.29612	2.29612	1.1992	PPM1K	Bos taurus protein phosphatase, Mg2+/Mn2+ dependent 1K (PPM1K), mRNA [NM_001046474]	ATCAAGAAACTGATTAGATTTAAAAAGTGAACTGTAAGTGGTGACCCTAGAACTCACTAG///TTGTGCAGAAAAGGAAAACCCATGAAGCTGACCATCGACCACACTCCAGAAAGAAAAGAC///AACTGATTAGATTTAAAAAGTGAACTGTAAGTGGTGACCCTAGAACTCACTAGACCAGTA///GAATTTGCCATGTGGCTATTACCATGTGGGTATCGGTATGGTGTAAATTATATTAATGTA
A_73_114350	0.000878626	3.73431e-05	up	2.2958	2.2958	1.19899		Rep: AT-hook-containing transcription factor. - Bos Taurus, partial (6%) [TC446870]	AACCCTGTAGCAGCTCAGACCTCAGCTTTTCTGGAATGTGTGTGCATCACTGATATTTGT
A_73_102792	0.0450909	0.0190087	up	2.29556	2.29556	1.19885		GB	AGCAGTCCCCAGGTGGGTTTTTTCTTTGTCCTGTGTGCCCAGATGCCTGGGGCAGGAAAA
A_73_P135151,A_73_P033571|615282	0.00114143	6.91997e-05	up	2.29542	2.29542	1.19876	CDKN3	LB00415.CR_D18 GC_BGC-04 Bos taurus cDNA clone IMAGE:8032964, mRNA sequence [DT832175]///Bos taurus cyclin dependent kinase inhibitor 3 (CDKN3), mRNA [NM_001040582]	AATTTTCCAAGAGGAGGAATTCATTGGTTCAGACAGCTGCTATTTTTTACAGCATTGTTT///AGCTAGCTGCACACCTTTCATCAAGAAATTCACTATCAAGATCTGTATCTAGATAAAAGA
A_73_117800|539935	0.00100647	5.37614e-05	up	2.29308	2.29308	1.19728	GJB3	Bos taurus gap junction protein beta 3 (GJB3), mRNA [NM_001104995]	CCTTTCAGGGACTTGAGATGGATGTACTGATAGGAACATCCCCAAGGCATTTTCCTTGAA
A_73_108228|786336	0.0026214	0.000353563	up	2.29024	2.29024	1.1955	PTMA	Prothymosin alpha Prothymosin alpha, N-terminally processed Thymosin alpha-1 [Source:UniProtKB/Swiss-Prot;Acc:P01252] [ENSBTAT00000003305]	GGCCTGTTTGATGTATGTGTGAAACAATGTTGTCCAACAATAAACCGGAATTTTATTTTG
A_73_120592|534029	0.0355959	0.0141294	up	2.28963	2.28963	1.19512	IP6K1	Bos taurus inositol hexakisphosphate kinase 1 (IP6K1), mRNA [NM_001076010]	TTGTCATCTATGACGGCAAGGAGTGCCGGTCTGAGTCCTACCTGGACCGCAGGTCTGAAA
A_73_108093|539455	0.00513624	0.0010204	up	2.28686	2.28686	1.19337	RNF141	Bos taurus ring finger protein 141 (RNF141), mRNA [NM_001040566]	AATCTTGGGTGGTATCTGATGCACCCACTGAAGATGATATGGCTAACTATATTCTTAACA
A_73_P046141|286851	0.0438856	0.018402	up	2.2831	2.2831	1.19099	GUCA1B	Bos taurus guanylate cyclase activator 1B (GUCA1B), mRNA [NM_174786]	ATCTTCCTTCTGGTGGATGAAAATGGAGATGGTCAGCTGTCCCTGAATGAGTTCGTTGAA
A_73_P456036|530930	0.00267036	0.000366366	up	2.28244	2.28244	1.19058	RHOBTB3	Rho related BTB domain containing 3 [Source:HGNC Symbol;Acc:HGNC:18757] [ENSBTAT00000005786]	GCTGACATTCAGGATTCCAGTATCATCCAGACCACCCAGGATCTCTTTACTATCAACAGA
A_73_P076161,A_73_P406931|537566	0.00125043	8.33451e-05	up	2.28174	2.28174	1.19013	KIF18A	Bos taurus kinesin family member 18A (KIF18A), mRNA [NM_001192909]	GTCAGTGTGGTGGCAGCTTAGTTTTACTATGCTTCAAGTTGATTAGAACATTTTAGAAAA///TTCTCTTCAAGAACAGCAACACAGACAGACAGAAGCAGTATTGAATGCATTACTTCCGGC
A_73_113814	0.00126051	8.5532e-05	up	2.27982	2.27982	1.18892		4068326 BARC 10BOV Bos taurus cDNA clone 10BOV15_P15 5', mRNA sequence [CK944151]	TTAACTCTCCAACAAACAATAAGTCTCTCTCCTGGGGTGGTGCTGGAAGGTTTAAAGATT
A_73_P069586,A_73_P042111,A_73_109216,A_73_P261866,A_73_P069581|281576	0.00280736	0.00039745	up	2.27753	2.27753	1.18747	WARS	Bos taurus tryptophanyl-tRNA synthetase (WARS), mRNA [NM_174218]///tryptophanyl-tRNA synthetase [Source:HGNC Symbol;Acc:HGNC:12729] [ENSBTAT00000006139]	GTGTCCTTCATGTACCTGACCTTCTTCCTGGAGGATGATGACAAGCTGGAGCAGATCAGG///GGCTTTGCTAAACTTTAAATTCCAAGATCTCACAGCTTAAAAGCTGCCTTTAACGTTTCT///ATGGGTGAAACTTTCCAGTTTACTTACTAAACTCCAGGCCATGCATGTACTGTACTCCAG///TACAAGAACGTGGTGAAGATCCAGAAGCACGTCACCTTCAACCAAGTGAAAGGCATTTTC///TTATTGGCCCAGGTCTGTAAGTTCTGTGTTTCTCTCAGCGCTGTTTCTTCCCTTGAATGT
A_73_P059446|100298658	0.0253195	0.0091744	up	2.27694	2.27694	1.18709	LOC100298658	GB	TCACCTCATTGTCCTCTCCCTGATGTACGGCAGCTGTGTGTTTATTTATGTGAAACCGAA
A_73_P066991,A_73_106102|282363	0.000766299	2.56055e-05	up	2.27604	2.27604	1.18653	SLC6A2	GB///Bos taurus solute carrier family 6 member 2 (SLC6A2), mRNA [NM_174608]	GCAGAGTTCTCTGTCTGTAAAAGCAAGGGTTGAATCAGAGAATTGAAGGTCTCACCCAGT///GGTTTCTTATACTCTCGGAAATCTAGATTTGTGGGTTCTTGTTCTGACTGTGAGAGGCCC
A_73_P072581,A_73_112937,A_73_P261536|515472	0.00252921	0.000332081	up	2.27592	2.27592	1.18645	RECQL4	Bos taurus RecQ like helicase 4 (RECQL4), mRNA [NM_001098037]	TTTCCGGGCTCTGGGCTCCGTCATCATCTACTGCCACAGGCGAGAGGACACAGAGCGTGT///ACTTTGAAGAAGAGTCAGAACAGCCAGGGGGCCTGGAGACAGAGGATGACCCCGAGCTGG///TGTCAGTGCAAGGAAGTGTCAGCCTGTTGACCGTCAAGGCAAGAAGCGGAGACAGAGTGG
A_73_P260471,A_73_108724|538680	0.000996608	5.09379e-05	up	2.274	2.274	1.18523	BCL11A	Bos taurus B-cell CLL/lymphoma 11A (BCL11A), mRNA [NM_001076121]	CAACACGCACAGAACACTCATGGATTAAGAATCTACTTAGAAAGCGAACACGGAAGTCCC///CCAAACCCCTTGTTTCTATACATTCTATGTTGTCTTTTAAGAAGTGTGCTTAACATTGAC
A_73_P184682,A_73_107250|617091	0.0006265	8.60734e-06	up	2.27167	2.27167	1.18375	ENC1	Bos taurus ectodermal-neural cortex 1 (ENC1), mRNA [NM_001078067]	ACTGCTTCCATTGCTGTTTCTCGTAATATCGTATCTTAGAAAATAGGGTTTAAGACCAAT///TGAGTATGTGGTTCACATACAAAACTGTGTAAGTTGAAGAAGTAAAGTGTTCGTGTTCAT
A_73_109972	0.0015178	0.000124885	up	2.27096	2.27096	1.1833		PREDICTED: Bos taurus TATA-box binding protein associated factor 4b (TAF4B), transcript variant X1, mRNA [XM_010818755]	GCTTAGCTTTATTTTTTGGTAAAGTGCAGCACACTCCCATATTTGTGTATAATCTTCTTG
A_73_P075686|788295	0.0102734	0.00279316	up	2.26914	2.26914	1.18214	OR52D1	PREDICTED: Bos taurus olfactory receptor, family 52, subfamily D, member 1 (OR52D1), mRNA [XM_001255397]	GGGTCTGGATTCTATTCTTATTTCTGTCTCCTATGGCTTCATCCTCCATGCTGTCTTTCA
A_73_P118641,A_73_P051026|509613	0.000878626	3.68565e-05	up	2.26839	2.26839	1.18167	EIF4EBP1	Bos taurus eukaryotic translation initiation factor 4E binding protein 1 (EIF4EBP1), mRNA [NM_001077893]	TCTTCTTCGTGGACACCAGCACATACCTCCGTGTGCCTCCAACTCTGCAGGAACTAGTAC///TGTGTGGGGAAAGCTCCCCACCCCCTCCCTTCCTGAGAAAGGAAATAAAAGCCACCTTCG
A_73_104939|505805	0.00143709	0.000113197	up	2.26735	2.26735	1.18101	LY6G6C	Bos taurus lymphocyte antigen 6 family member G6C (LY6G6C), mRNA [NM_001077856]	ATACATACCTCATCCCCATGCCCACCCCTTTCCATTTCGAGTAATAAACATGTAGAGCCG
A_73_P361491,A_73_P150321|512319	0.0107834	0.00298641	up	2.26669	2.26669	1.18059	JADE2	jade family PHD finger 2 [Source:HGNC Symbol;Acc:HGNC:22984] [ENSBTAT00000028903]	AAACATGCCATCTGCAAGCTCCAGGAGCAGATATTCCACCTGCAGATGAAACTTATCGAA///ACAGCCTGGAAATGAGGACTATCTTAGCAGACAACGATGAGGTCAAGTTCAAGTCGTTCT
A_73_100395|535742	0.025852	0.00944019	up	2.2664	2.2664	1.1804	SRC	Bos taurus SRC proto-oncogene, non-receptor tyrosine kinase (SRC), mRNA [NM_001110804]	TCCGGAAGCTGCCCTCTATGGCCGGTTCACCATCAAATCAGACGTGTGGTCCTTTGGGAT
A_73_P062651	0.00344503	0.000550717	up	2.26569	2.26569	1.17995		histone cluster 1 H4 family member l [Source:HGNC Symbol;Acc:HGNC:4791] [ENSBTAT00000033375]	CAAAACTGTTACCGCCATGGATGTGGTGTACGCGCTCAAGCGCCAGGGACGTACCCTTTA
A_73_P066906|618400	0.00906933	0.00233257	up	2.26543	2.26543	1.17978	GPT2	Bos taurus glutamic pyruvate transaminase (alanine aminotransferase) 2 (GPT2), mRNA [NM_001193187]	TAAAGACGGTTCTACAGAAGGTGAAGGACTTTCACATAAAGTTCCTGGAGGAGTACGCGT
A_73_P133146	0.00251281	0.000328685	up	2.26428	2.26428	1.17905		1360576 MARC 7BOV Bos taurus cDNA 5', mRNA sequence [DN532522]	TGGCGGTTGCTTTATGTTTCCTACAATGTATCTGCCTTATGTTTGGAAATAAAAATCTCT
A_73_107762	0.0170125	0.00548006	up	2.26353	2.26353	1.17858		Rep: Uncharacterized protein C7orf46. - Canis familiaris, partial (7%) [TC435602]	TTCTCTCTCCTAACAAATGAGGCTATTTTCATGTTAGTCAAAACCTTAAAGTACAGTAGC
A_73_P296232,A_73_109640,A_73_P244305,A_73_P276266,A_73_P253846|614773	0.00116231	7.13505e-05	up	2.26242	2.26242	1.17787	ZFP36L1	Bos taurus ZFP36 ring finger protein like 1 (ZFP36L1), mRNA [NM_001101234]	GGACTGCAAATTGAGTTTCTTTCTCTTTTGGGCTTTCCAACTAGGACTGAAAATGTATGT///CCACACATTAAGATGAATGTAATTATTATTCCTCTTGCTGGTCACTACCGTCGCTTTCTA///GAAGACTGCAAAAGCGGATGAAAGATTGTGACATAAGTGGGACTTTGTGATTTAATTTTT///GTAAAAGTTCTGTGACAGTACAGAAGGAAAACAACTTCTTATGTATAGCTTCTAAAAGGG///TTTGGACAACTCAAGACGCCTGCCCATTTTCAGCAGACTTTCCATCTCAGATGACTAAAC
A_73_P058056,A_73_P356801|522613	0.00113917	6.88281e-05	up	2.2621	2.2621	1.17766	PKMYT1	protein kinase, membrane associated tyrosine/threonine 1 [Source:HGNC Symbol;Acc:HGNC:29650] [ENSBTAT00000006206]	AGCAGCAGACGTGTTCAGCCTGGGCCTCACCATCCTGGAGGTGGCATGCAACATGGAGCT///TGTGTGGACTCCAGTGGTCCCTTCTGCCTGGCTGTGTCTAATAAAAGGTATTTGAATCTT
A_73_119268	0.0409886	0.0169283	up	2.26124	2.26124	1.17711		Rep: Isoform 2 of Q6NUP7 - Homo sapiens (Human), partial (89%) [TC466804]	AATATTTCTTTGCAAAGTGCTTTCTGTTTCTAAATAAAAGCTGTGCCTTCTGAAACCTGC
A_73_P113611,A_73_P104091,A_73_P070711,A_73_P052791|519148	0.0099753	0.0026732	up	2.25928	2.25928	1.17586	STX2	syntaxin 2 [Source:HGNC Symbol;Acc:HGNC:3403] [ENSBTAT00000061491]	ATGTCGAAGAAGTGAAGAAAAACCACAGCATCATTCTTTCTGCACCAAACCCAGAAGGAA///TCGAAGAAGTGAAGAAAAACCACAGCATCATTCTTTCTGCACCAAACCCAGAAGAAAAAA///GCTGTGTCACTGGTTCTGTTGGCTGTGATTGCTCTAATTATTGGTTTATCAGTTGGCAAG///TCAATGAAATTGAGTCCCGTCATAAAGACATCATGAAGCTGGAGACAAGCATCCGTGAGC
A_73_P037606|517812	0.00288241	0.000415314	up	2.25875	2.25875	1.17552	MCM6	Bos taurus minichromosome maintenance complex component 6 (MCM6), mRNA [NM_001046234]	GCTTCTCCGAATACTGCCGAATCTCTAACCTTATTGTGCTTCACCTCAGAAAGATGGAAG
A_73_P434156	0.000699123	1.85263e-05	up	2.25839	2.25839	1.17529		Rep: DMT superfamily drug/metabolite transporter - Bacillus pumilus (strain SAFR-032), partial (12%) [TC423059]	GGGGAAGTGCTGAATAGTATTAAACATTTTTGTCTTCCTTTACCTTTTATCTCCTACCTA
A_73_P090946|615240	0.000721264	2.1008e-05	up	2.25726	2.25726	1.17457	SNRPF	Bos taurus small nuclear ribonucleoprotein polypeptide F (SNRPF), mRNA [NM_001195027]	CCTTTATATCAGGGGTGTTGAAGAAGAAGAAGAAGATGGGGAAATGAGAGAATAGCATCT
A_73_P405626,A_73_P487753,A_73_P308246,A_73_110273|513870	0.00185247	0.000187394	up	2.25631	2.25631	1.17396	HPCAL1	Bos taurus hippocalcin like 1 (HPCAL1), mRNA [NM_001098964]	TTGTCTTGCCATTTAAGCTTTGCTTGCAAAAGTGGATGCCTCCTCAATCATCCCTGCTCT///TGGAGCAGAAGCTCAAGTGGGCCTTCAGCATGTATGACCTCGACGGCAACGGCTACATCA///TTTGACACCAATGGCGACGGCACCATCGACTTCAGGGAGTTTCATCATCGCGCTGAGCGT///AGGTGTCTCTGTGAGGCTTGTCCTCCCTGTTGATTGGTCTGGCATTTCCTGTATTAAAAT
A_73_103541,A_73_P399856|539704	0.00806215	0.00198455	up	2.25351	2.25351	1.17217	HIRIP3	Bos taurus HIRA interacting protein 3 (HIRIP3), mRNA [NM_001192296]	GCAGCGCGAAGAGGCAGCCGAGGTGGCTTCTTTGGACATTACCAACATCATCAGCAGTTC///GAAAAAGGTTCCGTTTCAATTCAGAGTCAGAGCCCAGCTCTGCAGCCTCCAGTCCAGACC
A_73_106081	0.00071998	2.07788e-05	up	2.25346	2.25346	1.17214		Rep: Tubulin beta chain - Homo sapiens (Human), partial (27%) [TC468202]	AAATGATACGTATCAACCCCTTCTGTACTTATATGGAAAGGTATGTGCTGCCACCTAAAC
A_73_114133|507449	0.00975676	0.00259069	up	2.25253	2.25253	1.17155	RASD1	Bos taurus ras related dexamethasone induced 1 (RASD1), mRNA [NM_001206261]	GAACAAGATCTTACCTAAGTGTTTGTACTGCATGTTGAGTCTTTAAAGTTATCGTTACTG
A_73_P337221,A_73_P038976|540693	0.000931587	4.2722e-05	up	2.25171	2.25171	1.17102	AP1S3	Bos taurus adaptor related protein complex 1 sigma 3 subunit (AP1S3), mRNA [NM_001103296]	CTCCTTTTTCTTTCCTCATCTCCCAAAGGAAGTACTTGCTGCTGCCTATTATTATTGTGA///GATCCTGGGTACGTCTTACATGGACCTTGGTGAAAATAATCATGTTTTCTTTATATCATT
A_73_P078771	0.000970437	4.83779e-05	up	2.24659	2.24659	1.16773		PREDICTED: Bos taurus protein WWC3-like (LOC523454), miscRNA [XR_083529]	CACCACCGAAATATGTAACCTTCTGTTGTGGGAATAAGTTATAATCAGTATTCATCTCTA
A_73_112257,A_73_P274826|527394	0.00900137	0.0023012	up	2.24657	2.24657	1.16772	PYGO1	pygopus family PHD finger 1 [Source:HGNC Symbol;Acc:HGNC:30256] [ENSBTAT00000012057]	TGCCATCTTATGTGAAGCCTCTTGTCAGAAATGGTTTCATCGGATCTGCACTGGAATGAC///CAATCAGATTCCTCCGCAGAATGCTAGCCAAGTATCTAACCCTGACTTGGCATCTAACTT
A_73_108437	0.000655957	1.38425e-05	up	2.24544	2.24544	1.167		PREDICTED: Bos taurus jade family PHD finger 2 (JADE2), transcript variant X6, mRNA [XM_005209396]	TTCAGGACCCCCTCTGCAATCCTCATGTGTTGGCAAACGCAGTTAATAAAGCAGTGTTTT
A_73_102824|533523	0.0469848	0.0199859	up	2.2446	2.2446	1.16646	DDR2	Bos taurus discoidin domain receptor tyrosine kinase 2 (DDR2), mRNA [NM_001083720]	TTTCACCTTTTGCCAGGAACAGCCCTATTCCCAACTGTCAGATGAACAGGTCATTGAGAA
A_73_P115686|510453	0.0497371	0.0214216	up	2.24157	2.24157	1.16451	ZBTB39	zinc finger and BTB domain containing 39 [Source:HGNC Symbol;Acc:HGNC:29014] [ENSBTAT00000056411]	ATTTTCCTCTTCTCCTGCGACATGTGTGAAACTAAGTTCTTTACCCAGTGGCAACTGACC
A_73_P252881,A_73_P252266,A_73_P033631|509107	0.00214109	0.000246165	up	2.24093	2.24093	1.1641	ATF4	Bos taurus activating transcription factor 4 (ATF4), mRNA [NM_001034342]	TTTTGATATCCTGTTCAGTAAAGATGACCTGGAAACCATGCCAGATGAGCTCTTGGCCAC///TAAAAGAGGAGGATGCCCCCTCAAATAATGAAAGTGGCATCTGTATGAACCCTGACTCCT///GGGTAGTCAGGAGTATGTGCGCTTGTATATAGAAGGCTGAAGCTGTGTTTTAATAAATTA
A_73_P381221,A_73_P074471|524870	0.0066899	0.00152048	up	2.23865	2.23865	1.16263	RBL1	Bos taurus RB transcriptional corepressor like 1 (RBL1), mRNA [NM_001192602]	TTGGTGACTTTGATGAGAGGATCTTTTTGGGAGCAGATGCAGAAGAGGAAATTGGAACCC///CTGAAGGTAGTAAACATCACTGAGTTACAAGAAAAGGTACACCAAAGTTAAGTGGATTTT
A_73_P354796,A_73_P072446,A_73_108364|506867	0.000629314	9.21493e-06	up	2.23792	2.23792	1.16216	NSL1	Bos taurus NSL1, MIS12 kinetochore complex component (NSL1), mRNA [NM_001101876]	TACATCTGTTGGACCTAAAATATGACCCTGATCCAGCCCCTCGGTTGGAAAACTTGAGAT///AAAGACTGCCCCCAGAGAAAATGGTATCCGTTGCGGCGAAAGAGAATTAATCTTGATACA///ACCTTCATTCCTTTACAGAGGAATTTACTAATCACGAGGTTGGAAAATAATGTACTTCTC
A_73_P183837|100297155	0.00720519	0.00169383	up	2.23641	2.23641	1.16119	HMGA2	PREDICTED: Bos taurus uncharacterized LOC100297155 (LOC100297155), mRNA [XM_002704288]	TCTCCCAAGTGGGTAACCCCAGACTCATTTCCTACATTTACTATTGGTGAGATTTCCAAG
A_73_104904,A_73_P102691,A_73_P332021,A_73_P043901|281119	0.000924144	4.20923e-05	up	2.23632	2.23632	1.16113	DNMT1	Bos taurus DNA methyltransferase 1 (DNMT1), mRNA [NM_182651]	GTGTTTGTGGCCTTGGCTGACATGAAACTCTTCAGTGAGATTTGCCTATCGGCTAATTTG///GAGGCAGACGATGACGAGGAAGTGGATGACAATATTCCAAAGATGCCATCACCCAAAAAA///ATCGGCTAATTTGACTTAGTGATCAAACTGTGCAGTACTTTGTCCATTCTGGATTTTAAA///GGAGGCTGCCAAGGACTAGTTCTCTCCTCCTATCACCCATGTTTCTGCCACCAGAGATCC
A_73_118868|614322	0.00514802	0.00102388	up	2.23365	2.23365	1.1594	RUNDC3A	Bos taurus RUN domain containing 3A (RUNDC3A), mRNA [NM_001076322]	TCAGGAAGCTGCTTCTTCCGGTGACCCCGATGCCTGGTTAGCTCCCAGCTGGACTCTCCT
A_73_P148826,A_73_P420006|507323	0.00439856	0.000808367	up	2.23268	2.23268	1.15878	RIMKLA	ribosomal modification protein rimK like family member A [Source:HGNC Symbol;Acc:HGNC:28725] [ENSBTAT00000023262]	ATGGCTGTGCTTCAGCTCAGGGAGTTGCAGAGAGCGTCTATGCCATCAACAGCGGGTCTA///TTAGTCAACCGCCCACAGAGCATTCTAAACTGCATCAACAAATTCTGGACATTCCAGGAG
A_73_103419	0.00248298	0.00032176	up	2.23065	2.23065	1.15746		PREDICTED: Bos taurus Wolf-Hirschhorn syndrome candidate 1 (WHSC1), transcript variant X1, mRNA [XM_613048]	CGCTGTTTGGGGGGAAATAGCATTTTAAGGTCGGAAATTGTGTCTGAAAGATTGTATGAG
A_73_111419,A_73_P381056|529336	0.00179921	0.000178339	up	2.22839	2.22839	1.156	TNFAIP8	Bos taurus TNF alpha induced protein 8 (TNFAIP8), mRNA [NM_001083711]	AGCATGTGAGTTGAAGTTGTGACTGCTCATGATTTATTTGAAGACGGAGCTCTGCTGATT///GAAGGGAAGAACGAATCTTGCTACAAGAACATGAGAATGAATGCATTTCAATGTTTAGTA
A_73_P040616,A_73_P115796|100126444	0.00137019	0.000103425	up	2.22742	2.22742	1.15537	PCP4L1	Bos taurus Purkinje cell protein 4 like 1 (PCP4L1), mRNA [NM_001110445]	GAGCAGAGTTGGAATAACCACTCTGTGTGATTTTAGCATGTGTAATAATTATGAGAACAA///GCCCTTGCTATTCAGGGCAAGTTCCGGCGATTCCAGAAAAGGAAAAAGGATCCCAGCTCC
A_73_P069199,A_73_P129969|532938	0.00442519	0.000816562	up	2.22623	2.22623	1.1546	ARID3B	Bos taurus AT rich interactive domain 3B (BRIGHT-like) (ARID3B), mRNA [NM_001193048]	TGAGGACCCAGTATATGAAATATCTCTATGCCTACGAGTGCGAGAAGAAAGCCTTGAGCT///TATGGCCAAGCAGATCCTGGACCTGTACATGCTGTATAAGCTGGTGACGGAGAAGGGGGG
A_73_106247,A_73_P048411|538143	0.000512795	2.58167e-06	up	2.22508	2.22508	1.15386	RHOV	Bos taurus ras homolog family member V (RHOV), mRNA [NM_001076099]	GCGCCCGTGCTGCTGGTGGGTACCCAGGCCGACCTGAGGGATGATGTCAATGTACTGATT///CTCCAAAATCATAGCCTAGAAGACAGGGCAATGTGGAATCTGCAAATAAAGCCTTAAGTT
A_73_P066116|535946	0.00360377	0.000593588	up	2.22494	2.22494	1.15377	KANSL1	KAT8 regulatory NSL complex subunit 1 [Source:HGNC Symbol;Acc:HGNC:24565] [ENSBTAT00000034753]	GACTATTGGCATTAAAGCTTCAGAAATCTCTGTGTTTGATATTCAAACATCATATGCCGA
A_73_114926,A_73_P253061|514440	0.000788587	2.73706e-05	up	2.22401	2.22401	1.15316	RAD18	Bos taurus RAD18, E3 ubiquitin protein ligase (RAD18), mRNA [NM_001035295]	TTCACTTGAGTAAATCGAATCTTAACACTTTGAATTCCAGCTATGAAATGGAGAGAATGC///CCTAAAGGCACAGAACAATAAAATACTGGGCATATTCTTCAGAAATAGCTTTTACAGAAG
A_73_P305307,A_73_P203427,A_73_P034866|539753	0.00071998	2.08506e-05	up	2.22091	2.22091	1.15115	BTF3L4	Bos taurus basic transcription factor 3 like 4 (BTF3L4), mRNA [NM_001098106]///Hw_loin_16_050628_E05 Bos taurus CF-24-HW loin cDNA library Bos taurus cDNA, mRNA sequence [DV796127]	GACATTGATGAGGAGGAGGATGATGTTCCAGATCTCGTAGAAAATTTTGATGAGGCGTCA///TTTTCTCCCCCAATAATAAAGAAAATTTTTAAAGTGGGGAGAGGGGCGCCCAATAAACCC///GGAAACCAGTTTTATTTATCCTCCTCCTTACCCCAGTAGAAATAAAGCAAATCTTTACAT
A_73_P492777	0.0180198	0.00588681	up	2.22086	2.22086	1.15112		PREDICTED: Bos taurus melanoma antigen family B, 4-like (LOC782703), mRNA [XM_003585379]	TTCCACGGTAGGGTCCCTAGTTCCTTCCCAGACCTTTATGACGAGGCGCTGAGAGATCAG
A_73_103344,A_73_P185257,A_73_P198972,A_73_P087446|768210	0.00128646	8.99389e-05	up	2.21905	2.21905	1.14994	RELL1	Bos taurus RELT like 1 (RELL1), mRNA [NM_001078098]	TGAGTTGGCTACCACCTTGATGTAAAAATTTGTAAAGGGAATTTTTCACCATTTTGAGTG///ACATTTTAGCAGCAATGGTAGAAGATAACAACGTGTGTGATCCTGAAAGCCCAGTGACGC///GTGCCTTGGGGCACTTCCTTTATTGCAAAAAGAAAACACAGTTCTCATTTATCTCAAAAG///TACAAAAGTGGAACCCAAGTCCAATCAGAAGGAGCGGAGAAGTTTGATGTCAGTTAGTGG
A_73_120681|507032	0.000609441	7.66154e-06	up	2.21864	2.21864	1.14967	PDCD2L	Bos taurus programmed cell death 2-like (PDCD2L), mRNA [NM_001192129]	TCAAAATGATCAGGCGCCCATGGAAGAGTTTTGTATTATCCAAGAGGACCCAGATGAATT
A_73_P052701	0.00804723	0.00197943	up	2.21769	2.21769	1.14906		LB0044.CR_D12 GC_BGC-04 Bos taurus cDNA clone IMAGE:30957683, mRNA sequence [DT829342]	GAAACCAAGAAAGAAGATGTTAAAGACTACAACAACGAAACTGCTGAAAATGGAGGGGCC
A_73_111694	0.02868	0.0107556	up	2.21711	2.21711	1.14868		Rep: MGC143310 protein - Bos taurus (Bovine), complete [TC394318]	GTCCTGCCGGAGCCTAGGAAGAAACTCCGTGTAGAAAAAACCCCAGTGACACCCAGTGGA
A_73_P064411|615119	0.00745369	0.00178258	up	2.21684	2.21684	1.14851	CTIF	cap binding complex dependent translation initiation factor [Source:HGNC Symbol;Acc:HGNC:23925] [ENSBTAT00000025156]	TCAGCAGAACAAGATGGACAAGTTGATCGAGATTCTGAACAGCATGCGGAACAATAGCAC
A_73_P135311	0.00577107	0.0012194	up	2.21609	2.21609	1.14802		PREDICTED: Bos taurus teashirt zinc finger homeobox 3 (TSHZ3), mRNA [XM_015467408]	CTATGTATAAAATATTGGCATGTAAACAGCACAGACACTCTGTGCCCTGTTTTGTTGTTG
A_73_P333356,A_73_P080716|533428	0.0478202	0.0204013	up	2.21467	2.21467	1.14709	GALC	Bos taurus galactosylceramidase (GALC), mRNA [NM_001206020]	GTGAAAATCATAGCGAGTGATAATCTCTGGGAGCCATTTCTGCTTCTATGCTGCTTGACC///AGGGGAAACAGCTGACGCTTTAACATGACCTGATGTGTCCCATACATAGGACATGAAGTA
A_73_P447591,A_73_109219|505200	0.00217694	0.000253766	up	2.21336	2.21336	1.14624	CCNF	Bos taurus cyclin F (CCNF), mRNA [NM_001098870]	TAGCTGAGAACACATGTGGCCCGAGTGTCCAGACACAGCTCCTCATCCCCCCATCTGTTT///TTTTCAGGGCTCTTGACTCCCTGTGGGATCTATCTTTTTTGCTGCTGTAGGCAAATCTGA
A_73_120169	0.0259581	0.0094888	up	2.21297	2.21297	1.14598		Rep: PREDICTED: lymphocyte antigen 6 complex, locus H - Bos taurus, complete [TC398048]	GAGGGGCTTGTCGGAGGATGTCTCCCACTCCGTTTTAAGTTTGCTCTGCTGCTCTGCGAT
A_73_P072006|540889	0.0066899	0.00152034	up	2.21156	2.21156	1.14506	PHF13	Bos taurus PHD finger protein 13 (PHF13), mRNA [NM_001206041]	ATAAACTGTACATAGCCAGTGACTGAATAAAATCCTTGTTGGCCAGAGCTGCTGCTGGAG
A_73_103853,A_73_P093996,A_73_P030961|407241	0.013387	0.00398206	up	2.2107	2.2107	1.1445	KLF15	Rep: LOC407241 protein - Bos taurus (Bovine), complete [TC395213]///Bos taurus Kruppel like factor 15 (KLF15), mRNA [NM_001082425]	TGTATATTTTCTTTGGTTCTTCATAAAAATATATTTGCCAATAAAAAGAAGAAAGAACTT///ATGCACAGGTGCACTTTCCCTGGCTGCAGCAAGATGTACACCAAGAGCAGCCACCTGAAG///GCCCTGATCTAGAAGTGCATTCCTTGTTTTGTCTAGAAATTAATATCAAATGAACTAGCT
A_73_116230	0.0361488	0.0144107	up	2.21049	2.21049	1.14437		Rep: Uncharacterized protein C20orf74 - Homo sapiens (Human), partial (3%) [TC419871]	TAATTCAGAACCACCGTGAAGTCATGACATTTGAGGATTTCACAGCCCAGGTCTTCTGTC
A_73_P446736,A_73_114234,A_73_P354131,A_73_P072471|614583	0.000944772	4.43334e-05	up	2.20882	2.20882	1.14328	SERTAD4	Bos taurus SERTA domain containing 4 (SERTAD4), mRNA [NM_001193037]	ATCCTATAACAACATCCAAGATCACATACTTTAAGAGGAAGTATGTGGAAGAAGAGGATT///TCGTCATTTGGACAATGTCCACAAGGACCAATTTTTAAAACCTGTTCTTGTGTTATGGCT///CAAGGACCAATTTTTAAAACCTGTTCTTGTGTTATGGCTGAATAGTCTAGTGATGTTTTG///AGGAAAAAGGAGCCTTCACCGAGTAACAAACTGTGCTGCAGCAAAGGCAGTAAAATATGA
A_73_P046661,A_73_120868,A_73_P407231|504244	0.000655957	1.19328e-05	up	2.20881	2.20881	1.14327	TUBA1C	Bos taurus tubulin, alpha 1c (TUBA1C), mRNA [NM_001034204]	TATTTGTGTTCCGTGGAGCTGCCCACTGTGGCCCTGTCTTATCAATAAAGGTGATATTTC///TTCCAGCCCCGCAGAACCGTACAAGTCTCCGTTATGCGTGAGTGCATCTCCATCCACGTT///TTTTGTAGCAGAGATCACCAATGCTTGCTTTGAGCCAGCCAACCAGATGGTGAAATGTGA
A_73_P179552,A_73_111597,A_73_P094821,A_73_P104186|532412	0.000920955	4.18658e-05	up	2.20851	2.20851	1.14307	SGO2	Bos taurus shugoshin 2 (SGO2), mRNA [NM_001191290]	GTATTCTGCCTAGATGGAAAAGCTTTCTTATATCCAGCAACTAAATATCCAGCAACTAAA///GCCAGATATATGAGGATAATGATAAAGATGTGCATGGCCAAGAAAGCTACACAAAAAATC///GCTTTACTGCATAAGTAAGATGCTGTGAAATGAGCTGTTTGTGTATGCTTATAATCACAT///TAACCCTTCCTAATGGCTTTGATCAGGGTGACAAACAAAGTATGCAGTGTAACCAAAAAA
A_73_P382771,A_73_P030726,A_73_P290261,A_73_P336876|615657	0.00243372	0.000310837	up	2.20332	2.20332	1.13968	ATG4D	Bos taurus autophagy related 4D cysteine peptidase (ATG4D), mRNA [NM_001099146]	AAGTGGGCAGATGATGCTGACTCAGGGCCTTCTGCTTCATTTCCTGCCCAGAGACTGGAC///TTTTAATTTATGTCATGTTAGGTGTGGGAGCTTGAACTCCCCCCTGACAAGTGCAGCTGA///ATGCTGGAGACAGAAAGGAGTTTGAGACGCTCTGCTCAGAGCTGACCAGGGTCCTCAGCT///AGAAACTCTCAACCCCGTGTACGTGCCCTGCGTGAAGGAGCTTCTTCGTTCAGAGCTGTG
A_73_109262,A_73_P455516,A_73_P294306|507197	0.00125708	8.44404e-05	up	2.20311	2.20311	1.13954	SHMT2	Bos taurus serine hydroxymethyltransferase 2 (SHMT2), mRNA [NM_001034282]	CCTCTGATCAGAGGCGACACCAGACGTGATTAGCAGGCGCAACAAATTCAATTTGTTAAA///AGAGGAAGGGGTGGGTAGGCACCCTTCTTTCTGTTTCTATCTAATAAAATACTAACCTGC///TATCTTCTTCGAGTCTATGCCTTATAAGCTGAACCCCCAAACCGGCCTCATTGACTATGA
A_73_100200,A_73_P049211|281736	0.00665742	0.00151005	up	2.20233	2.20233	1.13903	CXCR4	Bos taurus C-X-C motif chemokine receptor 4 (CXCR4), mRNA [NM_174301]	GAAATCACTTAGGCTAGAAATGATTCTCAGCTATTTGTAAATAAGTGATCTCTCCATTCC///GTCTGAATCTTCAAGTTTTCACTCCAGCTAACACTGGACTTTTGTACATTAAAGAACTTT
A_73_P442411,A_73_117746|539378	0.0104217	0.00284741	up	2.20188	2.20188	1.13873	SACS	sacsin molecular chaperone [Source:HGNC Symbol;Acc:HGNC:10519] [ENSBTAT00000002433]	AACAACTGCAGGAATGTGTGCAACATCACGACACTGGATGAAGATATGGTCAGGACTAGA///AGGTTCACGTCTGAGGTTGCCATGAGGGTGATGGAATGTACTGCCTGTATCATCATAAAA
A_73_107679	0.0019795	0.000213663	up	2.20117	2.20117	1.13827		PREDICTED: Bos taurus uncharacterized LOC100847254 (LOC100847254), miscRNA [XR_139287]	CTCAAAGTTTTGAAAAGCTATTAGCCAGGATCATGGTGTAATAAGACATAACGTTTTTCC
A_73_P080476	0.0020199	0.000221701	up	2.19968	2.19968	1.1373		Rep: Tetratricopeptide repeat protein 9A - Homo sapiens (Human), partial (60%) [TC433951]	CTTCAAGGAGATGGAAGAGTTGAGAAATAGTCATAGGAGATTATTACCAATGACACCTTT
A_73_106104,A_73_P067761|522670	0.000840866	3.19085e-05	up	2.19959	2.19959	1.13723	RELB	PREDICTED: Bos taurus v-rel reticuloendotheliosis viral oncogene homolog B (RELB), mRNA [XM_600955]///RELB proto-oncogene, NF-kB subunit [Source:HGNC Symbol;Acc:HGNC:9956] [ENSBTAT00000055496]	TCCTTCCCCAGGCTTGAAGGTGGGGGGCGGGGTAGGTTGTTTGTTCAGAGTCTTCCTAAT///GGAAAAAACCAGTCTTCCTGGATCAATTCCTGCCCAGCCATGGCTCAGGACCGTACCTCC
A_73_P385486,A_73_111078,A_73_P349846,A_73_P074021|505847	0.000825141	3.02095e-05	up	2.19846	2.19846	1.13649	CDC25B	Bos taurus cell division cycle 25B (CDC25B), mRNA [NM_001191415]	TATGAAAGCAGCTAAACTAAGGCCAGCCACTTCTGGATTCTGAATCTTGGGAAATGGGCA///CTTCTTGAAGGCTCTGCTGAGTCATCTAGAAGGGTCTTGGTTCAATAAAGCACTGAGCAA///CAGTTGTTAAAGATACAAACATTCATAACCCACTTGGCCCTGGCTTCTGTGGCTCGGAAA///ACCCTGCAGCCTGGATAAGAGAATCATCCTCATTTTCCACTGTGAATTTTCATCTGAGCG
A_73_103821|613732	0.000645456	1.01614e-05	up	2.19748	2.19748	1.13585	CENPS	Bos taurus apoptosis-inducing, TAF9-like domain 1 (APITD1), mRNA [NM_001038576]	TTCCATGTCTTATTGAAGTGCATGAAAAGGGCATGTGTTTGAATGGTATATGTTGGAAAT
A_73_P363976	0.00383929	0.000656052	up	2.19678	2.19678	1.13539		RAD51 paralog C [Source:HGNC Symbol;Acc:HGNC:9820] [ENSBTAT00000020012]	GAGATATTACAGGTACTGTGTTTTGCAAATGTGGAAAGCTGATCTCATGTGGCTAATCTG
A_73_P079566	0.00970816	0.00257187	up	2.19438	2.19438	1.13381		olfactory receptor family 4 subfamily K member 1 [Source:HGNC Symbol;Acc:HGNC:14726] [ENSBTAT00000052685]	TTTTGCTCATTTCTTACACTATCATTCTTGCTACTGTCCATCGCCAAGCCTCTGGTGGGA
A_73_107643|615387	0.00133505	9.8061e-05	up	2.19388	2.19388	1.13348	CDK2AP1	Bos taurus cyclin dependent kinase 2 associated protein 1 (CDK2AP1), mRNA [NM_001076369]	CTGCCTTTTCTGAGGGTTGACCCAAACATCTGGAAGAAAATGGAACTGTTTGCGTCTTTG
A_73_P260951,A_73_121459,A_73_P355511|509348	0.0026332	0.000356701	up	2.19274	2.19274	1.13273	LBR	Bos taurus lamin B receptor (LBR), mRNA [NM_001100329]	TGTCACAAAAAGACCTGCATTGTTGAGAACCTCTGAAGTGACAGCCACACAGTCAAAGGA///CGTGGTCCCTCCCATGCGGTTTCAATCACATTCTGCCGTATTTCTACGTGATTTATTTCA///ATCACATTCTGCCGTATTTCTACGTGATTTATTTCACCATCTTGCTGGTGCACCGGGAAG
A_73_106801,A_73_P245891|505169	0.00488604	0.000945	up	2.19211	2.19211	1.13232	GATA3	Bos taurus GATA binding protein 3 (GATA3), mRNA [NM_001076804]	TCTGTGTTCTCACTCCCCGAATCTGGATCCCATTTGTGAATAAGCCATTCAGACTCACAT///GCTTCCCTTTTACAATTTGGCCCGTTTTTGTCCTCCCGTACCTAATTTTGGGAATTTCTT
A_73_103097|535623	0.00848615	0.00212373	up	2.19162	2.19162	1.132	RHBDL3	rhomboid like 3 [Source:HGNC Symbol;Acc:HGNC:16502] [ENSBTAT00000027954]	CAGTCGCTGTGGTGGATTTTTGTGGCCATGTACACCGTCTTCGTGCTGTTCGCTGTCTTC
A_73_P117871,A_73_P468363,A_73_P432926,A_73_P034286|515452	0.000827634	3.04268e-05	up	2.1915	2.1915	1.13192	UQCC3	Bos taurus ubiquinol-cytochrome c reductase complex assembly factor 3 (UQCC3), mRNA [NM_001075714]	CAAAACACAAGTCAGATCTGTGGTTTGTGTGAGTGGATAACCAAATGATGTTCTTGAAAT///TGCAGGAAGCAGCGGCCACGCAAGAGAACGTCGCCTGGAGAAAGAACTGGATGAGTGGCG///TACGTTTTAACGTCCACATCGCGGGCTGTGGCTAACTGAAGGAACCAATAAATCATGTTC///ATGATGTTCTTGAAATTATAAGTAGCCTGGAAACTCTTGTGCAATAAACACCCATAGAGG
A_73_121296	0.00225721	0.000273603	up	2.18923	2.18923	1.13042		Rep: E3 SUMO-protein ligase PIAS2 - Homo sapiens (Human), partial (46%) [TC461335]	TCGGCCGTTAGAACGCTTGTTTGGAGTTCCGTGTCCTCAGTTTACCTTTTGATCGTTAAA
A_73_P106036,A_73_P080001|516077	0.00152809	0.000126314	up	2.18771	2.18771	1.12942	BNIP2	Rep: BCL2/adenovirus E1B 19 kDa protein-interacting protein 2. - Canis familiaris, partial (84%) [TC405401]///Bos taurus BCL2 interacting protein 2 (BNIP2), mRNA [NM_001040534]	CCATCCCTCTTGGTTTATAGAAACCTTCTGGGTGTAAAAAACCATTATAAGGAAATTTTC///GACTGTTCACTGCTGTATTGGTTTGCAGATCTCTTGAATTTAGTTCTTTACTAGCTAATT
A_73_P053181	0.0276152	0.010249	up	2.18755	2.18755	1.12932		PREDICTED: Bos taurus melanoma antigen family B, 4-like (LOC782703), mRNA [XM_003585379]	TTCCCAGACCTTTATGACGAGGCTCTGAGAGATCAGGTGGAGAGAGCAGGGCAGAGAGGT
A_73_120391	0.00122741	7.97493e-05	up	2.1864	2.1864	1.12856		Rep: Ras-related protein R-Ras2 precursor - Homo sapiens (Human), complete [TC417910]	GAATGTGTACAACAGTTTCATGAAGTTTATAAAGCGTACCCTTGTATAGCTTCAGGTGCT
A_73_P352351	0.000655957	1.17228e-05	up	2.18509	2.18509	1.12769		LB011144.CR_I18 GC_BGC-11 Bos taurus cDNA clone IMAGE:9070364 5', mRNA sequence [EV615604]	AGCTTTTGGTCACTGGAGGCTAATGCCTAAGAAGTTTAGTTTATGAATGTAAGAATGAAA
A_73_P434341,A_73_P330751,A_73_109214|100125317	0.000629314	9.46787e-06	up	2.18415	2.18415	1.12707	ERO1A	Bos taurus endoplasmic reticulum oxidoreductase 1 alpha (ERO1A), mRNA [NM_001103348]	CAGGATGCAGAAAACCAAATGTTACTTCTGGAAATACTTCATGAAATCAAGTCATTTCCT///GCTGTTCTTCAGTGGACCAAGCATGATGATTCCTCAGACAACTTCTGTGAAGTTGATGAT///TGAAAAGTGCCTGTTTCTGGACAGTGGAGGCCAAAGAATGGAATTGCATTCAAAGGCATA
A_73_101141	0.0173283	0.00561004	up	2.18322	2.18322	1.12645		PREDICTED: Bos taurus ferritin light chain-like (LOC615291), miscRNA [XR_084139]	GAATTATTCCACCAAGGTAGAGGCCGCCATCAACCACCTGCTCTACATGCACCTGCAGGC
A_73_109585,A_73_P400706|615542	0.00170039	0.000156281	up	2.18221	2.18221	1.12579	MAD2L1BP	Bos taurus MAD2L1 binding protein (MAD2L1BP), mRNA [NM_001076381]	CGTGCACACAATGGCTAAATTATCTTCCCCTGGTGGCGCCATGTCACCCATCTGCTTGGA///GTCGCTTTACTTGTGAGCTTCTAAAACATATCATGTACCAACGCCAGCAACTACCTCTGC
A_73_113752,A_73_P049266|768073	0.00100015	5.13191e-05	up	2.18148	2.18148	1.12531	OSGIN1	Bos taurus oxidative stress induced growth inhibitor 1 (OSGIN1), mRNA [NM_001077129]	AGTGCCGAGCCAGGAGGACTTCCAGGCCCCGCTCTTTCCAGAATCAGGTCCCAAATAAAA///AGATGCTGTACCCCGAGTACCACAAGGTTCACCAGATGATGCGCGAGCAGTCCATCCTGT
A_73_P089221	0.016662	0.00532262	up	2.17775	2.17775	1.12284			TGTGCCAGCAGTTACTCCACGGTGCTGCACGGCCACCTCCTTTCTATGCAAAAAAGCAGG
A_73_P105706,A_73_108835|527595	0.0387376	0.0157525	up	2.17761	2.17761	1.12274	MCM10	minichromosome maintenance 10 replication initiation factor [Source:HGNC Symbol;Acc:HGNC:18043] [ENSBTAT00000021822]	CAAAAGATCTTAATTATGGGGGAAGCTCTTGACCTGGGAACCTGTAAAGCAAAGAAAAAA///AAAGACAGGTCCAAAGATAGGAGGAGAAACCTTGTTACCAAGAGGAGAAGAACATGCCAA
A_73_P126336	0.00154632	0.000128997	up	2.17538	2.17538	1.12127		LB01637.CR.1_A15 GC_BGC-16 Bos taurus cDNA clone IMAGE:8325113 5', mRNA sequence [EH169447]	GGTGGAAGGCGTTTATTTTATTAGCTAACCAAATATCATTGAGAGGAATTTGAACTACTG
A_73_103645|534176	0.00979808	0.0026039	up	2.17486	2.17486	1.12092	MNAT1	Bos taurus MNAT1, CDK activating kinase assembly factor (MNAT1), mRNA [NM_001105409]	CCGTAAGCCTCATCTGATGGAAGATATGAATAATTCACCTATGTGAGTTTGAGGTTGACA
A_73_P045516,A_73_P057012|768057	0.000655957	1.24519e-05	up	2.17483	2.17483	1.1209	HIGD1A	Bos taurus HIG1 hypoxia inducible domain family member 1A (HIGD1A), mRNA [NM_001077114]	GTGAATTCTCGTCTAACCTGAATTTACATTCCATGGTGATAACATGGTAAATGTAGTGTT///GGCTGGTTGGCTCTTGAGGAACCCTTTCAGAACAGTGCATGGAATACAACATTATAAACC
A_73_108344,A_73_P087796|515407	0.000700122	1.88113e-05	up	2.17381	2.17381	1.12023	MOB1B	Bos taurus MOB kinase activator 1B (MOB1B), mRNA [NM_001192412]	CTTGGTTGTTTTTATCTACTCTTGGAGGGCTTGTTTGGGTTCCTTTTTCTTTAATCTGAA///GATGGGGACCTATGCAAATTATTCCTCAAATCAAGCTGTGTGGAGTGTATTTGAATTTTG
A_73_P046146,A_73_P104176,A_73_P113266|404118	0.00622762	0.00137038	up	2.17352	2.17352	1.12003	CEACAM1	Bos taurus carcinoembryonic antigen related cell adhesion molecule 1 (CEACAM1), mRNA [NM_205788]///carcinoembryonic antigen-related cell adhesion molecule 1 precursor [Source:RefSeq peptide;Acc:NP_991357] [ENSBTAT00000007371]	TCAGCCTCCCCATCTCCAACAAATACAGAAACAATTTATTCAGAAGTGAAAAAACAGTAA///CTAGAAGTAACTAGAAAACAACTTCTCAGTGTTCATAAGTGTATCTTGATGGAAACTGCA///AGGACAAAAGGACTCTCACTGTGTTCAATGTGACAAGGAATGACACAGGACCCTATGTGT
A_73_P094881	0.00339556	0.0005381	up	2.17312	2.17312	1.11977		393882 MARC 4BOV Bos taurus cDNA 5', mRNA sequence [BI536679]	CATAGACAGCTGCTATATCAAATACTCACATCCTTTGTCCATTATGTTGCATCATTACAA
A_73_P341141,A_73_119930,A_73_117651,A_73_P049806,A_73_P351951|540803	0.00251281	0.00032864	up	2.17218	2.17218	1.11914	MRAS	Bos taurus muscle RAS oncogene homolog (MRAS), mRNA [NM_001098118]	GAATTTTTCCAGCCATGCCAAAACTGACCTCATTATGAAAGTAGAGTGACCGAGAGACTG///GGACCCTCCACTGCCTAACTGCATTGAAGACCATTCTAACCATGACCCTTGGCCCGAGGA///TCCTGCGCGTCAAGGACAGGGAGTCATTCCCGATGATCCTCATGGTCAAAAGGTCGATCT///TCTCGATGAAGCTTGAGCCTTTTGTGTAACTTTTATTAAGTCTTTGTGTATCCCAACTCA///AACGTCGACAAAGCCTTCCACGACCTGGTTAGAGTAATTAGGCAGCAGATTCCGAAAAAA
A_73_P381386	0.0155264	0.00484949	up	2.17111	2.17111	1.11844		RAD51 paralog C [Source:HGNC Symbol;Acc:HGNC:9820] [ENSBTAT00000020012]	ATCGCTTTTCCTTTTCGTCATGACCTAGATAACCTGTCCCTTCGTACTCGATTATTAAAT
A_73_120389|529404	0.00054871	4.62389e-06	up	2.17039	2.17039	1.11795	CCDC50	Bos taurus coiled-coil domain containing 50 (CCDC50), mRNA [NM_001038147]	AGCAATTAGGATTTTGTGGAGGTAATGATCAAAGTAAAACAATGTTTGGATGCAATGCAG
A_73_112397|615863	0.00686726	0.00158013	up	2.17027	2.17027	1.11788	ZC3H12D	zinc finger CCCH-type containing 12D [Source:HGNC Symbol;Acc:HGNC:21175] [ENSBTAT00000009713]	AGGCTCATGCTCCTCATCCAGAGATTCCAAAGGTCCAGTGCGCCCGTGGGGAAGCGCTGA
A_73_P492313|782159	0.0388462	0.0158217	up	2.16814	2.16814	1.11646	LOC782159		ATCTTCATGAATGGTAACCGTGCCACTGAGGAGAAGATCTGGGAATTCCTCAGTATGTTG
A_73_P046751,A_73_P097306|518897	0.00164242	0.000146819	up	2.16794	2.16794	1.11632	CHEK2	Bos taurus checkpoint kinase 2 (CHEK2), mRNA [NM_001034531]///Rep: Protein kinase CHK2 isoform a - Bos taurus (Bovine), complete [TC458705]	TATGGGACGGCTGCTTTTCCACAACCATTGACACACAATTCAAAATGTGATGGAACCTGG///CCTTGACTTTAGTCACATGAAATTGATTTTAGACTTCTGACCTCCAGACTTAACAGAATA
A_73_P128421,A_73_103980|504797	0.00281673	0.000400276	up	2.16472	2.16472	1.11418	TRERF1	transcriptional regulating factor 1 [Source:HGNC Symbol;Acc:HGNC:18273] [ENSBTAT00000020376]	GGGACTGCCCGCTTGTTTTGTAATCATTTTAAACTACCTGTTTAAAAAGTGGTCTTTTTT///AGTCCAAGACGGTGGCTCAGTGTGTGGAGTACTATTACACGTGGAAAAAATCATGAGGTT
A_73_P143106	0.0169532	0.00544933	up	2.16365	2.16365	1.11347		1184848 MARC 7BOV Bos taurus cDNA 5', mRNA sequence [DN284561]	CAATAAAAGATTTTGTATCACCTGCTTTGTATCGTCTGCTTGTGCAAATAAAGTTTCCTG
A_73_113688	0.00129386	9.10567e-05	up	2.16279	2.16279	1.11289		Rep: SMC2 protein (Structural maintenance of chromosomes 2) (SMC2 structural maintenance of chromosomes 2-like 1 (Yeast), isoform CRA_a) - Homo sapiens (Human), partial (27%) [TC418952]	TCACACTGTTAATATAGTATACCTGTTGACTTCAACCTGGTCGGCAGTGGCTATTAATTA
A_73_103669|511219	0.0400745	0.0164619	up	2.16084	2.16084	1.11159	LRRC71	Bos taurus leucine rich repeat containing 71 (LRRC71), mRNA [NM_001105357]	AAGGGACCCCATCAGTAAATGCAGGCACAAAGAGGAGGAGCCCGTGGCTTCTTCCACCTA
A_73_P247056,A_73_102963,A_73_P334336|505149	0.0018851	0.000194344	up	2.16077	2.16077	1.11155	DYRK3	Bos taurus dual specificity tyrosine phosphorylation regulated kinase 3 (DYRK3), mRNA [NM_001100298]	CAAAACTTCTGGAACAATCCAAACGTGCCAAGTACTTTATTAACTCCAAGGGCCTGCCTC///GTTAAAAGAACTCTTCACAAGGGCTAAATTACCTAACCAGCTTGTATTGGCCATCCTGGA///TAAAACCGGTAGCATGAACGTGATTCACATGCTAGAAAGTTTCACATTCCGGAACCATGC
A_73_113188	0.002487	0.000322708	up	2.15945	2.15945	1.11066		Rep: Predicted protein - Physcomitrella patens subsp. patens, partial (12%) [TC423328]	TGTGTGCTCATCCCATCATTTGAAACCCTTCGTATAAAACATTGTAGTATCATTTGGAAA
A_73_P069356,A_73_P069366|503579	0.04142	0.0171459	up	2.15836	2.15836	1.10994	FOXA1	Bos taurus forkhead box A1 (FOXA1), mRNA [NM_001206029]	TCAGCCCTGGAGCCAGCCTACTACCAAGGTGTGTATTCTAGACCCGTTCTAAACACTTCT///AACATGTTCGAGAACGGCTGTTACTTGCGCCGCCAGAAGCGCTTCAAGTGCGAGAAGCAG
A_73_117737|516026	0.00112048	6.64732e-05	up	2.15815	2.15815	1.1098	GPRC5A	Bos taurus G protein-coupled receptor class C group 5 member A (GPRC5A), mRNA [NM_001034515]	ACACACGGGCAGGGGGTTGTTTCTTGTAAAATAAGTTATTCGCCATTCTTCCCTCCAGAT
A_73_P088061,A_73_P142476,A_73_117511|540769	0.0081919	0.00202758	up	2.15812	2.15812	1.10978	NSD2	nuclear receptor binding SET domain protein 2 [Source:HGNC Symbol;Acc:HGNC:12766] [ENSBTAT00000010497]	AGAGCTGACCTTCAACTACAACCTCGACTGTCTGGGCAACGAGAAGACGGTGTGTCGCTG///AAGGGCTGGGGCCTGGTGGCCAAGCGGGACATCAGGAAGGGGGAGTTTGTGAACGAGTAT///CAAGCAGGCACCCACGAAAGCTGAGAAAATTAAGCTGTTGAAACCCATTTCAGGGAAGTT
A_73_105161,A_73_P286741,A_73_P398906,A_73_P089556,A_73_P441781,A_73_P433506|509106	0.000667089	1.47721e-05	up	2.15808	2.15808	1.10975	EZH2	Bos taurus enhancer of zeste 2 polycomb repressive complex 2 subunit (EZH2), mRNA [NM_001193024]	TCTCACCAGCTGCAAAGTGTTTTGTACCAGTGAATTTTTGCAATAATGCAGTGTGGTACT///GATTTTTGCTAAGCGAGCCATCCAGACTGGTGAAGAGCTGTTTTTCGATTACAGATACAG///AGAGAATGTGGGTTTATAAATGATGAAATTTTTGTGGAGCTGGTGAATGCTCTTGGTCAG///TACTGTGGGCGATTTAGAAAAGGAAAATGCAGTTTGAAATTCTGAATTTGCAAAGTACTG///TTTGTGAAAAATTTTGTCAGTGTAGTTCAGAGTGTCAGAACCGCTTTCCTGGCTGCCGCT///CTGCAAAGTGTTTTGTACCAGTGAATTTTTGCAATAATGCAGTGTGGTACATTTTTCAAC
A_73_114997|507139	0.000573456	5.32513e-06	up	2.15806	2.15806	1.10973	GCA	grancalcin [Source:HGNC Symbol;Acc:HGNC:15990] [ENSBTAT00000024550]	ATCAGTCCCTTGGCAAACACGCCTCAGTCTTTCTAAATGAAGAGTTAGTAAACCACATAC
A_73_P061773	0.00393732	0.00068449	up	2.15671	2.15671	1.10883			TATGGACCTTTCCCAGAGAACTTTACAGGTCCTAATCAAACAGGAAATTCAGAGGAAGAG
A_73_P077221	0.0287482	0.010791	up	2.15434	2.15434	1.10725		RAS like family 11 member A [Source:HGNC Symbol;Acc:HGNC:23802] [ENSBTAT00000006899]	ATGCGTTCCGGCATCTGTGCAGAGAAGTAAGCAAGCTGCACAACCTGGGGTCAGAGAGGA
A_73_112435	0.00370948	0.000622152	up	2.15298	2.15298	1.10633		PREDICTED: Bos taurus chromosome 13 open reading frame, human C20orf112 (C13H20orf112), mRNA [XM_001253180]	CAACCCCCAGATAATTACCTTTCAAGTCTTAGGTGAGCAGAATCGCATATTTATTGAGAA
A_73_120503	0.00185203	0.000187205	up	2.14999	2.14999	1.10433		Rep: Ubiquitin carboxyl-terminal hydrolase 1 - Bos taurus (Bovine), partial (20%) [TC404989]	TTTAGAATGCATTTTCCTTAGTAGAGACTAGTGATACATTAGCTTCTGGGAACAAACTTG
A_73_105698,A_73_P131006|523360	0.00537315	0.00109422	up	2.1499	2.1499	1.10427	CARD14	Bos taurus caspase recruitment domain family member 14 (CARD14), mRNA [NM_001205901]	TGAGCTGGATAAAGTGCCCTGTCTATATAGCAGCCTGGCCCCCGAAAGCTGGAGTGACCT///AGTGTCTGTGTCCTGCACAGGATGGAGATTTTCCCCATCATTATCCATGTCTCCATCAAT
A_73_113635,A_73_P050361|616923	0.00519542	0.00103817	up	2.14662	2.14662	1.10207	VAMP4	Rep: Vesicle-associated membrane protein 4 - Bos taurus (Bovine), complete [TC398831]///Bos taurus vesicle associated membrane protein 4 (VAMP4), mRNA [NM_001076438]	CATGCTGAAAGATGTGTATAACCATTCCATCGATATTTGCAAGATTCCTCTCATATTAAC///GGCTTTGGTTGCTGTTATCCTTTTGTTAGTGATTATCATTCTTATAGTTGTGAAATACCG
A_73_P376666,A_73_P423661,A_73_P061711|532126	0.00948447	0.00248915	up	2.14426	2.14426	1.10048	ANO1	Bos taurus anoctamin 1 (ANO1), mRNA [NM_001192717]	TATCATCTTCATGATCGCCGTGACCTTTGCCATTGTCCTTGGCGTCATCATCTACAGAAT///TCCAGAACAACCTGTTTGAGATCGGCATCCCGAAAATGAAGAAGTTCATCCGCTATCTGA///GTTGTTTTTGCACAAAACCATTATGCAGGGAATCCTGTTTAGTGTTCAGCGTTAATCAAA
A_73_P060281|782444	0.00365625	0.000608961	up	2.14398	2.14398	1.10029	TRIM8	Bos taurus tripartite motif containing 8 (TRIM8), mRNA [NM_001191476]	AGACAGAGGACGTCAGCTTCATGAAGAACACCAAGTCTGTGAAAATCCTAATGGACAGGA
A_73_P084006	0.0052804	0.00106247	up	2.14018	2.14018	1.09773		LB02743.CR.1_F08 GC_BGC-27 Bos taurus cDNA clone IMAGE:8625994 5', mRNA sequence [EW684810]	CCGGGCACATCCTGTACTCCCTGACAAAGGAGTATGGGGTGGAACAGGGCTTATTCCTTT
A_73_105576|616634	0.00120245	7.68442e-05	up	2.13733	2.13733	1.09581	HIST1H2AH	PREDICTED: Bos taurus histone cluster 1, H2ah (HIST1H2AH), mRNA [XM_010818503]	AAACTGAGAGCCATCACAAGGCCAAATAAAGAGGTTAGGAAAGGTGAAAAAACCAACGGC
A_73_P053841,A_73_P113586,A_73_P070426|537817	0.00165797	0.000149479	up	2.13694	2.13694	1.09555	TBC1D9	TBC1 domain family member 9 [Source:HGNC Symbol;Acc:HGNC:21710] [ENSBTAT00000029790]	TGAATCAGGGGCAATTTATCGAGCTTTGTAAGACGATGTACAACATGTTCAGCGAGGACC///TTCTTCTATGAAGGAATCAAAGTGATATTCCAGTTGGCCCTGGCTGTGCTCGATGCAAAC///ATTCCAGTTATTAGATGAGAATGGAGACTCTCTGATCAACTTCCGAGAGTTTGTCTCGGG
A_73_118406,A_73_P065881|508530	0.00300536	0.000444125	up	2.13684	2.13684	1.09548	PSMC3IP	Bos taurus PSMC3 interacting protein (PSMC3IP), mRNA [NM_001244194]	AAGGCCTGGATGCCAAAATCTTGGCTCTCACGGCTAAGGTGCAGAGCTTGCAGCAGAGCT///AAGAAGCAGTTCTTTGAGGAAGTTGGGATAGAGACGGATGAAGATCACAACGTCAAGCTC
A_73_100385,A_73_P109846,A_73_P154502,A_73_P252656|614988	0.00137019	0.000103458	up	2.1367	2.1367	1.09538	TPPP3	Bos taurus tubulin polymerization promoting protein family member 3 (TPPP3), mRNA [NM_001034774]///Hw_loin_56_050811_E12 Bos taurus CF-24-HW loin cDNA library Bos taurus cDNA, mRNA sequence [DV798727]	TGCTCTGGCCAAGTGCCTAATTCTTTCCTGGACCTCAATAAAGACACCTTTTGTACCAAT///TAAGCTGCTGCTCTGGCCAAGTGCCTAATTCTTTCCTGGACCTCAATAAAGACACCTTTT///CCCTCTTCTTGTTAAAATGTTTCCAATTGTCTTGTCGGGGTTAAAATATTAGATGGGTTT///ATTGCTGGGCGGCAGGACATCCTGGATGACAGTGGCTACGTGAGTGCCTACAAGAATGCA
A_73_101554	0.00351159	0.000567179	up	2.13583	2.13583	1.09479		Rep: Brca2 protein - Canis familiaris (Dog), partial (5%) [TC401368]	CGACCAGTTCTTCATCCTTAAGTCAGCATGACTACAAGAAAAACAGAACCCTCTGTGCAC
A_73_114871|528492	0.0172953	0.00559681	up	2.13486	2.13486	1.09414	MPL	Bos taurus MPL proto-oncogene, thrombopoietin receptor (MPL), mRNA [NM_001192663]	TGCCCTTCTGGCTGCACTTCATAACACTGATCTTTCACCACTGCTGCTGGCATCCATCTG
A_73_116120,A_73_P429116|540262	0.0138982	0.00418596	up	2.133	2.133	1.09288	DLK2	Bos taurus delta like non-canonical Notch ligand 2 (DLK2), mRNA [NM_001083494]	TCCTCAGCTGGGTTACACACACTGAGGGACCTCAGCCTCATGCCACAAATATTATTTTTT///TTTGACTGTCTCTGCCCCAGCGGCTATGGTGGCAAGACTTGTGAGCTAGTCTTACCGGTC
A_73_P074136|507969	0.000609441	7.65967e-06	up	2.12926	2.12926	1.09035	SLCO4A1	Bos taurus solute carrier organic anion transporter family member 4A1 (SLCO4A1), mRNA [NM_001192727]	TAATTGTCTTTACCTTCCTCAGCAGCATTCCTGCACTAACAGCAACTTTACGGTGCGTCT
A_73_P499893,A_73_P115716,A_73_120956|615510	0.0305271	0.0116678	up	2.12919	2.12919	1.0903	PARPBP	PARP1 binding protein [Source:HGNC Symbol;Acc:HGNC:26074] [ENSBTAT00000061381]	CAAGTGGATAATTCACCAATGAAACCCTTAAGAGAAAGCATCTATAAGTCAATGGAAGAG///TTAGATGAAATTCTTGGAGAAGTCTCAAATCCAAGCATTGCGGGGGGTCGGATACTCTCA///CAAAAAGCAATAGATGTACCACCAAGGACAAATTGATTACTGGCCAGACAAAGTTGACTC
A_73_103936|511466	0.00100208	5.17712e-05	up	2.12699	2.12699	1.08881	SSSCA1	Bos taurus Sjogren syndrome/scleroderma autoantigen 1 (SSSCA1), mRNA [NM_001038528]	TAGCCTTATCCGGGCGTGTGCTGAAGCCCTGCGTAGTCTGCAGCAGCTGCAACACTAAAA
A_73_116108	0.00133168	9.70904e-05	up	2.12639	2.12639	1.08841		PREDICTED: Bos taurus MID1 interacting protein 1 (MID1IP1), transcript variant X1, mRNA [XM_005228294]	AGCAAATGTGTTAACGAAACTTGACAAAAGTTTGTTGCTTTCTAATCTGCCAATGAATGG
A_73_109149	0.0012282	8.01496e-05	up	2.1263	2.1263	1.08834			TATCAAATTAATCAGTGCAGCCAACCTTATTTATGAACCACATCTTTGAAACTGTGCAGT
A_73_116977,A_73_P311731,A_73_P489228|538772	0.00277444	0.000389382	up	2.12475	2.12475	1.0873	DARS2	Bos taurus aspartyl-tRNA synthetase 2, mitochondrial (DARS2), mRNA [NM_001102222]	TACTTTCCCTGAATCTCTCTTCTTGTCAGAATCCTAGGAGATAAATATATGTGGAAGATA///GCAACCAGCTTCACCACAAGAATCCTATAAAATAACCTGGATAATGACATTTATACTATC///TTTACTCAGATCGACATAGAGATGTCCTTTGTAGACCAGACGGGCGTCCAGAGTCTAATT
A_73_P043846|615135	0.0104712	0.0028673	up	2.12381	2.12381	1.08665	IPMK	Bos taurus inositol polyphosphate multikinase (IPMK), mRNA [NM_001035462]	CGTCATACAGAGCTTGGTGCATATCTAAATTCATGCTTCTGTTTCATTCTTACTCAAAAC
A_73_115687	0.00630969	0.00139756	up	2.1226	2.1226	1.08583		Rep: Complex: S. cerevisiae Tsc13p coimmunoprecipitates with Elo2p and Elo3p - Aspergillus niger, partial (8%) [TC447072]	AACAGCACATTGTGATGACAACACAGAATGGATTCATCTTGTATCATTATAGGCAGAAGG
A_73_P086071|538833	0.0011468	6.96566e-05	up	2.12161	2.12161	1.08516	HAUS6	HAUS augmin like complex subunit 6 [Source:HGNC Symbol;Acc:HGNC:25948] [ENSBTAT00000031479]	GTAGCCCAGTCAGTTTAACTGTGATGCACTTAATTTGAAGCAGTGACATAAAATAAAAAC
A_73_P324666,A_73_113698,A_73_P259316|539524	0.00327109	0.000508291	up	2.12131	2.12131	1.08496	HSPB8	Bos taurus heat shock protein family B (small) member 8 (HSPB8), mRNA [NM_001014955]	TCCCCCTTACTCACCGTTTGGAGAGAGCAGTTTCAACAATGAGCCTCCTCAGGACGGCCA///CTAGTGGTGTTGTGTATATGGGTGGGACGTGCGTGTCATTGTTATTTGAATTGTGCTGTT///ATCTTATCTTGCAGCTAATGCAAGAGTTACTTTTCTCTGGGGACCGGGATTCCCATTCTG
A_73_P032546|787569	0.00792904	0.00193941	up	2.12118	2.12118	1.08487	LARP6	Bos taurus La ribonucleoprotein domain family member 6 (LARP6), mRNA [NM_001099205]	TTGGCATGAAGCCACCCAAAAAGAAACCATCCAAAGAGAAGAATCAGGACGAAGAACCCA
A_73_119412,A_73_P098776,A_73_P101206|282871	0.000933332	4.29085e-05	up	2.12117	2.12117	1.08486	MMP9	Bos taurus matrix metallopeptidase 9 (MMP9), mRNA [NM_174744]	GGGAGGTGGGCTGGGCCCTCTCTTCCCACCTTCCTTTCTTATTAGAATGTATTTAATAAA///AAAGTTGTGGTCTCTGGGCAAAGGCGTTGTGATCCCGACCTACTTCGGAAACGCGAAGGG///AAGATTTTCTTCTTCTCTGGGCGCCAAGTATGGGTGTACACCGGCGCGTCGTTGCTAGGC
A_73_110628	0.00179297	0.000175357	up	2.12079	2.12079	1.0846			GTCTTTCCAGGATGTCTGTTTGTACAGCTACAAGACAGATGTTAGCATATAGTAGATGTT
A_73_P370611,A_73_119709,A_73_P324791|515476	0.000509628	1.61912e-06	up	2.11945	2.11945	1.08369	ORC6	Bos taurus origin recognition complex subunit 6 (ORC6), mRNA [NM_001046201]	CTGGAGATTCAGTTACTCCACCACAGAAGAAAAAGAAGACAGTGATTGAACCTTCAGCAA///AAAGACAGTCTTCTGCCCTATCCATAATATGAAATTCAGGCTGAATGGAGTCTAAAGATT///AACAAGAAGATGTATCAGAGTTGTCTTAAATCTTTTGAGTGTTTATTGGGCCTGAACTCA
A_73_102649,A_73_P435441,A_73_P105266,A_73_P112641|767904	0.000655515	1.12931e-05	up	2.11934	2.11934	1.08362	MGC126945	Bos taurus uncharacterized protein MGC126945 (MGC126945), mRNA [NM_001076983]	TCGCAGGATTCGCGGTCGAACTTGAAGGTCATCGTTGGCAACCACAACCACAGTGAGCTG///ATATTTTGGTATCGCGTCCTGACCTCGGGAGGGACCTTTATCAATCTGTCGGTTATCTGG///CCCCACCATTGTGTAATGGTATCATAGGTGTTTGTGTATCATCGTATTGTTTATTTACAT///ACCTTTATCAATCTGTCGGTTACTTGGACGACACGCAGTTCGTAAGATACAACAGCGACA
A_73_P284321,A_73_120314|512651	0.00153375	0.000127132	up	2.11767	2.11767	1.08248	CDC23	Bos taurus cell division cycle 23 (CDC23), mRNA [NM_001080266]	GGGCACTGGATAGACAGACATGACTCATCATTCTTTGATGTGCTGAGCATGACTACTTTG///GCAGAGCAAGGAGACAGGATTACAGAGTTTCACAGATATTTGGGTGTGTAACTTTTGTGA
A_73_104330,A_73_P250311|104976701	0.00463168	0.000875535	up	2.11263	2.11263	1.07904	MIC2	Bos taurus CD99 molecule (MIC2), mRNA [NM_001281907]	CAGCGGGTCAAGTGCATTGTGGAACACAGCGGGAATCACAGTGCACACCTCATACCCTTG///ATGGAAATGGAGTTAAGCAAGCATTACCAGGCCTATGTGCAGGGAGAACTTTGTTGGAGA
A_73_P053792	0.00197899	0.000213068	up	2.11226	2.11226	1.07879			TTTGGGAGGAGAAGTTCAGGAAATACCCAAGAATGTCCTTAAAGCAACTGAGCAGGCTGA
A_73_116281|511100	0.0104621	0.00286437	up	2.10931	2.10931	1.07677	OIP5	Bos taurus Opa interacting protein 5 (OIP5), mRNA [NM_001205692]	ACCTATATTCTACCCATGCTGCCCTGGCTGCCTTGAGAGGCCACTTCTGCCTTTCCAGTG
A_73_106549	0.000655957	1.36025e-05	up	2.10573	2.10573	1.07432		Rep: Telomeric repeat binding factor (NIMA-interacting) 1 - Bos taurus (Bovine), complete [TC393537]	TTGTTTTTCTTATTAAAGTTTTATACATTACTTTCTCATTGTTCCTGAGTTTGTTGTCTT
A_73_103044,A_73_P455571|282599	0.013688	0.00410077	up	2.10505	2.10505	1.07386	LRRC25	Bos taurus leucine rich repeat containing 25 (LRRC25), mRNA [NM_174688]	CTAGAAGGGGAGGAGAGACCCCAATGCGGATGGGGATGGGAGAGTCAATTTGTGAACTCT///AGACATCGGATGGACCAGAACCTGAGCAAAACCTGGGCTTCTCAGGATGGCTCCAGGTCT
A_73_101598|510080	0.000655957	1.17524e-05	up	2.10502	2.10502	1.07383	ANTXR2	Bos taurus anthrax toxin receptor 2 (ANTXR2), mRNA [NM_001076826]	CTTGAATCTTTTGCTCGAGTTTATTTATGTCACTGGCTGGCTGGATCCAAAGTCATGTGT
A_73_P038011,A_73_P304731,A_73_108074|538580	0.00360177	0.000593121	up	2.10403	2.10403	1.07316	KIAA1524	Bos taurus KIAA1524 ortholog (KIAA1524), mRNA [NM_001103284]///KIAA1524 [Source:HGNC Symbol;Acc:HGNC:29302] [ENSBTAT00000022784]	CTGAATGAGTCACTCAAGCAGCAAAATGAAAAAACTATTGCCCAATTGATAGAGAAAGAA///AATGCCTTGTCTAGGATTATTGGCAAATCTTTGCCGGCACAATCTTTCTGTTCAAACGCA///AGCAAGAGGAGTTAAACAAACATTCTCATATGATAGCAATGATCCACAGTCTAAGTGGTG
A_73_P475588	0.0013401	9.8993e-05	up	2.10273	2.10273	1.07226		Rep: PREDICTED: centrosomal protein 152kDa isoform 2 - Pan troglodytes, partial (9%) [TC488821]	CTACTTGAGATATTAATGTTGCCTTCATCTTCCAAAGACTTTGGTGCTGTGTGTGTAATC
A_73_P042371,A_73_P081151|613548	0.0016154	0.000142999	up	2.10237	2.10237	1.07202	MARCKS	Bos taurus myristoylated alanine rich protein kinase C substrate (MARCKS), mRNA [NM_001076276]///myristoylated alanine rich protein kinase C substrate [Source:HGNC Symbol;Acc:HGNC:6759] [ENSBTAT00000002691]	TTTCCTTCAAGAAGTCTTTCAAGCTGAGCGGCTTCTCCTTCAAGAAGAACAAGAAGGAGG///TGGTATGTTTTTGATTACAGCAGACAATGCTTTCTTTTCCAGTCGTCTTTGAGAATAAGG
A_73_101904,A_73_P151281|539780	0.0355408	0.0140968	up	2.10169	2.10169	1.07155	NAIP	NLR family apoptosis inhibitory protein [Source:HGNC Symbol;Acc:HGNC:7634] [ENSBTAT00000004317]	CCTCAGTCTAAACATTTCATCCTTTCCTGGAAATGGATACTGCCATTCTCTCCAATCATT///CATGTTAAGTTGGCTCCTGGATGCAGAAGACATCACACTGCTTACTGCCACAATAAAAAA
A_73_P050791,A_73_P262656,A_73_P277531,A_73_117291|539043	0.00182569	0.000182527	up	2.10138	2.10138	1.07133	ODF2	Bos taurus outer dense fiber of sperm tails 2 (ODF2), mRNA [NM_001038180]	ACAAGATCCTTAAAGATGAGATGAACAAAGAGATTGAAGCGGCACGGAGGCAGTTCCAGT///AATACAATGTGAGAAGGCTCAAGCAAAGACAGCATCTGAGCTTTCCAAGTCCATGGAGAC///TGACAGTTTAATGAACGCGGTTGGTTGTCTCAAGTCTGAGGTCAAGATGCAGAAAGGAGA///ACTTCCTTTTTCTTGGCTGCCGCTTTCTGAAAGGAGTGAGCTATCATCAGTGCTGTGAAA
A_73_P401916	0.0344928	0.0135879	up	2.09359	2.09359	1.06598		Rep: Fibroin 2 - Dolomedes tenebrosus (Nursery web spider), partial (3%) [TC462953]	AAACCTTCGACTGCGTCTGGCGTTTCTGAGCTCCAGTGGGCTAGGGCCTGCGGGTTTCCT
A_73_P063366,A_73_P402791|509083	0.0287328	0.010783	up	2.09307	2.09307	1.06562	PDZRN3	PDZ domain containing ring finger 3 [Source:HGNC Symbol;Acc:HGNC:17704] [ENSBTAT00000024807]	GCAAAATCGCCAGACGGCACTAGAGTATACAATTCATTCCTCTCGGTGACTACTGTATAA///TTGGTGGCCGGCCGTGTGTGGACAACCAAGATGGATCGTCCAGTGAAGGAATCTTTGTAT
A_73_P066096,A_73_P330496,A_73_114275|513486	0.00697339	0.00161538	up	2.0923	2.0923	1.06509	RDM1	Bos taurus RAD52 motif containing 1 (RDM1), mRNA [NM_001192351]	TAGAACTGAAGAGGAACTACAGGATTTAATTCAAGTCAGCTGCTTTTCCTGGAAGCCGTG///CTTTCTGACCCTGAAGAAGAAACGGAAAATGAAGATATGGTGGCACCTCTTAAGAGGCAA///AGACTTAAGCTTTGAGGAGCAAGAGTTCACAGTGCCAGAACTGGACTAGCACTTCTGAAT
A_73_P308726	0.00110357	6.5116e-05	up	2.09096	2.09096	1.06417		Hw_Fat_64_050830_H08 Bos taurus CF-24-HW fat cDNA library Bos taurus cDNA, mRNA sequence [DV780844]	CTCCTGCTTATCCAAGTAGAGATTGTTTAAGGAAACTTGAGACCCTTGGTTAAAGGTATT
A_73_103956	0.000629314	9.21283e-06	up	2.08809	2.08809	1.06218		Rep: Sperm-associated antigen 1 (Infertility-related sperm protein Spag-1) (HSD-3.8). - Bos Taurus, partial (28%) [TC400063]	CAAAAGGGAAAATGAAGAACTCTTTATATTGAGAGCTCCCTTGTTACTTGGGTCAAAGTA
A_73_P357336,A_73_104164,A_73_P424641,A_73_P046211|537412	0.00065224	1.08971e-05	up	2.08788	2.08788	1.06204	SMARCB1	Bos taurus SWI/SNF related, matrix associated, actin dependent regulator of chromatin, subfamily b, member 1 (SMARCB1), mRNA [NM_001040557]	AGGCGACTAGCCACTGTGGAAGAGAGGAAGAAAATAGTTGCATCGTCACATGGTAAAAAA///TATAGAAGCCCCCGGCAGGGCAAGCAACACTTTCTAAATAAAAAGGCAACAGGTTCTGTT///TGGAGAAGAAGATCCGGGACCAGGACCGGAACACAAGGCGGATGAGGCGTCTGGCCAACA///AGTTCGAGTGGGACATGTCGGAGAAGGAGAACTCGCCCGAGAAGTTCGCTCTGAAGCTGT
A_73_P087816,A_73_118556|536269	0.0297194	0.0112625	up	2.08764	2.08764	1.06187	MTHFD2L	Bos taurus methylenetetrahydrofolate dehydrogenase (NADP+ dependent) 2-like (MTHFD2L), mRNA [NM_001206095]	TTGGAGATGTGGACTTTGAAGCTGTTAAGAAGAAGGCTAGCTTTATCACTCCAGTTCCGG///TTTTTTCATGGGTAGAATCATTGTGGATCAGATGATTCACACAATCTTATGCATTTCCTG
A_73_114274,A_73_P251396|527845	0.000840866	3.19373e-05	up	2.08751	2.08751	1.06178	ACOT9	Bos taurus acyl-CoA thioesterase 9 (ACOT9), mRNA [NM_001034560]	TCTTCCATGGAGATGAAGGATATATTCAGCTTTTAGGATGGTGCAGAAAAGAGGAATGAG///TTAGATGGGCAGCGGCATTTCAAATCTATGAGTGCACCAGTGACCTTGAAAAGGAACTAC
A_73_103822,A_73_P491358,A_73_P107626|539013	0.000704573	1.93205e-05	up	2.08283	2.08283	1.05855	CDYL	Bos taurus chromodomain Y like (CDYL), mRNA [NM_001102223]	CTCGCGGAGAGCTTACAGAGTGTAAATCTGCCTTTACTTGGATTGGTTGGTGCAGTATTT///TCGTTGACAAAAGGAAAAACAAGAAAGGGAAGACGGAATATTTGGTTCGGTGGAAAGGCT///GGACTTGAGACAGCCAAGCTATTTATTGCCAAGGAGTTTTTAAGTACTGTAACTTTAAAA
A_73_P102521,A_73_P356916,A_73_103367|326577	0.000938013	4.34807e-05	up	2.08258	2.08258	1.05837	SLC1A4	Bos taurus solute carrier family 1 member 4 (SLC1A4), mRNA [NM_001081577]	AAGTGCATTGAAGAAAACAATGGTGTAGACAAGAGGATCAGCCGGTTCATTCTCCCCATC///TTGGGCCATTTTATTCACGGAGGAATTGTTCTGCCACTTATTTATTTTGTCTTCACGAAA///GCTGTTCATCTCTTTTCAATATGTGACACTTGCCTTAAAACATAGCAGTCTTCAAAATGA
A_73_P336686	0.00273907	0.000380901	up	2.08017	2.08017	1.0567		PREDICTED: Bos taurus DIX domain containing 1 (DIXDC1), transcript variant X4, mRNA [XM_010812389]	CTGATTATCAAAGTGATAACCAGTTTTAACTGCCTGTATGTACCAGATTTGTGAACTAGT
A_73_P325296,A_73_P325611,A_73_120947|767842	0.00304974	0.000453353	up	2.08002	2.08002	1.0566	C6H4orf32	Bos taurus chromosome 6 open reading frame, human C4orf32 (C6H4orf32), mRNA [NM_001076961]	GTCCTGTTTCTAAAATTTATTCTGTATGTCCTCAGCATCTTCCATACTGAAGCAGAAAAA///CAAGTCAGTAATTGGCCAGGCATGTTATTTATGTGTCTTATTCAACACTTTTGGGGTTTT///TTGACATTATTCGTGTCCAGTAGAGTTGCGAGGTTTTTAACAGAAGTCATGAGATTTTGT
A_73_P490218	0.00822575	0.00203922	up	2.07989	2.07989	1.0565			ATCACCTTTTCCCTCCAAGGCAACTCAGTGGTAAGACAGGAGTGGAGGTGGCTGTCTGCG
A_73_112926,A_73_P365991,A_73_P256416|506601	0.00286104	0.00040973	up	2.07945	2.07945	1.0562	RCAN3	Bos taurus RCAN family member 3 (RCAN3), mRNA [NM_001045945]	TCTAAGTGATCAAAAGTCATGATGTTTTATTATTTGGCTTGGCTTTCATGCTGTACCTTC///TTTAGAAGAGTCCGAATAAATTTCAGCAAGCCTGAGGCAGCAGCAAGGGCTCGAATAGAA///TGTAGAAAAGTGTTGTAACTAAGAATGCTTTGCTTCAGGTCAGGTGGCCGTACTGGCTTT
A_73_108623	0.00394444	0.00068708	up	2.07773	2.07773	1.05501		Rep: Histone-lysine N-methyltransferase SUV39H2 (EC 2.1.1.43) (Suppressor of variegation 3-9 homolog 2) (Su(var)3-9 homolog 2) - Bos taurus (Bovine), partial (13%) [TC433216]	GGCGATCTCTGCTGAATACCTCTGGTCTCCACAGTAAAAACAAGATTATCTCTTTAGAGC
A_73_103203|520924	0.000705488	1.93851e-05	up	2.07578	2.07578	1.05365	NUP205	Bos taurus nucleoporin 205 (NUP205), mRNA [NM_001130931]	CTTTCTTTATATATGGACTTCTTTTCTGTAAACTTCTTTGCCTGGTGCCGTGCTCACTAG
A_73_P079806,A_73_P487618,A_73_112194|505206	0.00188692	0.000194753	up	2.07447	2.07447	1.05274	EHD4	Bos taurus EH domain containing 4 (EHD4), mRNA [NM_001192053]	TTATCAGCAGGTTGCCAGAAATCTACATTCAGCTACAGCGAGAATACCACATCTCTGCAG///AGAGACATCCAGAGCCTTCCCCAGAAGGCGGCAGTGCGCAAACTCAATGACCTCATCAAG///CCTCAGAGAGCAACGGGAGGCAGCAAAGACCAGCTTATTTATTTTGTTCCCTGCTTAATT
A_73_P032691|515723	0.00408593	0.000723488	up	2.07402	2.07402	1.05243	STK40	Bos taurus serine/threonine kinase 40 (STK40), mRNA [NM_001075727]	GGTCAGCAGAGGTACCGCGAAGCTACCTTTTGGAATGATTGCTTGATTGTTTGGTTTTTT
A_73_P252856,A_73_108553,A_73_P274741,A_73_P332341|533297	0.000609441	7.54566e-06	up	2.07381	2.07381	1.05228	YBX3	Bos taurus Y-box binding protein 3 (YBX3), mRNA [NM_001098074]	CCTTTTCTGTTCATTTTGGATGCTGGTGCTAAACTTCCAAGTGTCATGATTTAAAAAAGA///ATAAGGGGAGGGTAACATTTTGCTTTCTTATGTAACTCTCTTCGAAAATGTGCAGTACCA///AAATAACCCACGGAAATACCTGCGCAGTGTAGGAGATGGAGAAACCGTAGAGTTTGATGT///GAACACCAAAGAAACGTCCAAGCAATAAAGTGGAAGATTAATAACCAAGATGTGGACATT
A_73_P290406,A_73_111543,A_73_P419731,A_73_P326556|100124507	0.0037113	0.00062288	up	2.07342	2.07342	1.05201	LIG1	Bos taurus DNA ligase 1 (LIG1), mRNA [NM_001102548]	TAAGATTAAACTCCCATCGGTCACATCCTTCATCCTAGACACAGAAGCTGTAGCTTGGGA///TGGTGTTGCCCTGTGTGTGTGTGAGGGGATGGTTTCAGCGGGGGTCTGGGGTTCGGTCAT///ATGATCCTGAAGCAGACTTTCTGTGAGGTACCTGACCTGGAGCGGATCGTCCCCGTGCTT///TTTCAAGATGTTCTGAAAGAGCAGGGCGAGGACAAGGATCCAGAAACTAAGAAGAAGAAG
A_73_P471298	0.0220373	0.00765519	up	2.07327	2.07327	1.05191		Rep: Poly (ADP-ribose) polymerase family, member 4 - Homo sapiens (Human), partial (8%) [TC478516]	GCCGAATCTTTTTTCCTGTTCTGCAAGTCTTCTCCCTTGTCCACTTGTAAAGTCTGTCTT
A_73_P205107	0.00610991	0.00133425	up	2.07245	2.07245	1.05134		Rep: Bromodomain containing 2 - Homo sapiens (Human), partial (20%) [TC410911]	ATGAGGTTTATGACGTCATCGCTTCCGCCGACCAATAGAAAACGCTCCCGCGGAGAGGTG
A_73_P041356|538314	0.00164242	0.000146828	up	2.07154	2.07154	1.0507	TBCCD1	Bos taurus TBCC domain containing 1 (TBCCD1), mRNA [NM_001083730]	GAAGGTGCTCTTGCTGCTCTCAACTTTGGAGATTTTTCTTCCTATTTAAGACCTTTATGT
A_73_P051161,A_73_P264691|536936	0.00560989	0.00116551	up	2.06976	2.06976	1.04946	SUV39H2	Bos taurus suppressor of variegation 3-9 homolog 2 (SUV39H2), mRNA [NM_001037479]	CCTCCTTCAGTGTTTAAGTGTTAAACTGATGATGTAACAGTTGCTAAGATTGAACATTCA///TATGAGTGCAACTCAAGATGTCAATGTGGACCCGACTGTCCCAACAGGATCGTACAAAAA
A_73_111853|533462	0.00161684	0.000143786	up	2.06951	2.06951	1.04929	SAP30L	Bos taurus SAP30-like (SAP30L), mRNA [NM_001191372]	ACAGCTTGAGTGATGATGAAGCACACCTTCAAGGAATGAAGTATAATATTAATGCACAGG
A_73_P112131	0.00825342	0.00204702	up	2.06939	2.06939	1.04921		GB	ACATGGTAGGGTCCCTAGTTCCTTCCCAGACCTCTATGACGAGGCTCTGAGAGATCAGGC
A_73_P052501|379035	0.00326086	0.000505783	up	2.06935	2.06935	1.04918	TERC	Bos taurus telomerase RNA component (TERC), telomerase RNA [NR_001576]	GGAAAAGCCTCGGCCTACCGCCATCCACCATCCAGTCTGCAACAAACAAAAAATGTCAGC
A_73_P153066|618071	0.0479885	0.0204932	up	2.06875	2.06875	1.04876	LOC618071	Bos taurus uncharacterized LOC618071 (LOC618071), mRNA [NM_001206718]	TAAATTCTGTACGACCCCCGGTCAACTCTCTCTTCTCGCAGCTCTGGTCCCAAGGCTGGT
A_73_P104596,A_73_P050071|512508	0.000708854	1.98822e-05	up	2.06812	2.06812	1.04832	MPHOSPH6	Bos taurus M-phase phosphoprotein 6 (MPHOSPH6), mRNA [NM_001075564]	CATGAAGTTCATGCAAAGGGGACTGGACTCGGAAACCAAGAAACAACTAGAAGAGGAAAA///CTCTTCGGGCTAAGTATTTTCATGCTACAAAGTCAATGTCAATGTGTGGAATTAAGTTTT
A_73_P096696,A_73_P096691,A_73_P039466|353350	0.00192626	0.00020177	up	2.06791	2.06791	1.04817	SMC4	Bos taurus structural maintenance of chromosomes 4 (SMC4), mRNA [NM_001105326]	ACACGAGTAGCTTACCAAAAAGATAGAAGATGGAGAGTGGTAACATTACAAGGGCAAATC///GTACTTCATGGATGAGATTGATGCAGCCCTTGATTTCAAAAATGTTTCTATTGTTGCATT///GTATACCTACCAAGAGTGAGAATATCATAAGGGATACAACAACTAAAAACAATGCCCTTG
A_73_115802|512301	0.023159	0.00816418	up	2.06756	2.06756	1.04793	HAMP	Bos taurus hepcidin antimicrobial peptide (HAMP), mRNA [NM_001114508]	CTGCATCTTCTGCTGTGGCTGCTGTCGTAAAGGCACATGTGGGATGTGCTGCAGGACATA
A_73_109021	0.0025439	0.000335366	up	2.06611	2.06611	1.04692		AM032400 KN-252-spleen, Bos taurus Bos taurus cDNA clone C0006008e01 5', mRNA sequence [AM032400]	TGTAATGGCCACTGACCTTCTCATGGGATGCAGGTGAAATCACTTGTCAACGCAAAATGT
A_73_P338506,A_73_119227|100139879	0.00122741	7.97934e-05	up	2.06566	2.06566	1.0466	NUP37	Bos taurus nucleoporin 37 (NUP37), mRNA [NM_001191327]	AGAGAAGAATGGAACAATTCGGTTTTATGATCTTTTGGCTCAACAGGCTATTTTATCACT///CCACAAGCTGTTGTTTTGGGTGACTGAAATGTAGAATAAATTTTCTATGTACTTAGATCC
A_73_P076931,A_73_P457026|515082	0.0201695	0.00682167	up	2.06543	2.06543	1.04644	OLFM4	olfactomedin 4 [Source:HGNC Symbol;Acc:HGNC:17190] [ENSBTAT00000030920]	CCTTCTGAATTATGATCTTGTCTTCCGGCAGATACCCCAGTAAACTTTCATGTGTTAGGG///TTTTCCGGAAGCACAGTGATCATTGACCAGTTGGAAGTGGAGATCAGGAATATGACTCTC
A_73_111244	0.00136332	0.000101709	up	2.06426	2.06426	1.04563		Rep: Cyclic AMP-dependent transcription factor ATF-4 (Activating transcription factor 4). - Bos Taurus, partial (79%) [TC406862]	AATAAATTATTTTGTAGTGAAAGTACTACTGCACAGTCTGGTCTGTTGCCTCTGGTAAGA
A_73_P104621	0.0026694	0.000366031	up	2.06344	2.06344	1.04505		Rep: CDH8 protein - Bos taurus (Bovine), complete [TC394118]	CGCGATCATGGAAGAGTTAATTTCTTATGAAGCTATTCATATAGTTAAGGGGTTTTTTGG
A_73_108291	0.0150502	0.00465895	up	2.06312	2.06312	1.04483		Rep: 39S ribosomal protein L22, mitochondrial precursor (L22mt) (MRP-L22). - Bos Taurus, partial (8%) [TC483330]	CTCTGCCTGAAATTCTGCATGGTCATCTTCCCCAGTTCCTGCAAGTCTTTATTCAAGTGA
A_73_P130776,A_73_P036196|514937	0.000954734	4.56002e-05	up	2.0617	2.0617	1.04383	TIMM10B	LB01627.CR_B04 GC_BGC-16 Bos taurus cDNA clone IMAGE:8087814, mRNA sequence [DT815376]///Bos taurus translocase of inner mitochondrial membrane 10B (TIMM10B), mRNA [NM_001040530]	TTGCCCTGATGAAAGAAAATGGGAACCTCTATCTAGCTGTCGTTAAATCTGTCTGACTGA///GTCCGAGAGCTGGGTACTGTTGCTCCTCTTCCTGGAGCTAATAAACCCACTTTTCCTCTG
A_73_102463,A_73_P428971|505102	0.0024113	0.000306139	up	2.06108	2.06108	1.0434	TONSL	Bos taurus tonsoku like, DNA repair protein (TONSL), mRNA [NM_001075188]	CACCTCTGACTGGCCAGCCCCATGGTGTGCCCTGCCCAGGCCTCTAATAAAGAAGCCACT///AAACCTTTGCAGAAAGCTTCAGTCTGCCGGACCCTGAAGTATGTGCTGGCGGTGGTCCAG
A_73_P062661,A_73_P062706,A_73_P038366,A_73_P165502|616790	0.00173173	0.000161709	up	2.06087	2.06087	1.04325	HIST1H2AG	Bos taurus histone cluster 1, H2ag (HIST1H2AG), mRNA [NM_001098720]	AACAAGCTGCTGGGCAAAGTCACCATCGCTCAGGGTGGTGTCCTGCCCAACATCCAGGCG///TGGCCATCCGCAACGACGAGGAGCTCAACAAGCTGCTGGGCAAAGTCACCATCGCTCAGG///TGGATTACTTCGCACCAGTTTAGGTCTCAATCAAACCAAAGGCTCTTTTCAGAGCCACTT///TGCAGCTGGCCATCCGCAACGACGAGGAGCTCAACAAGCTGCTGGGCAAAGTCACCATCG
A_73_P033956,A_73_115978|281350	0.000848582	3.27482e-05	up	2.06039	2.06039	1.04292	NGF	Bos taurus nerve growth factor (NGF), mRNA [NM_001099362]	CGCCCCTCCCTACCTCAACCTGTAAATTATTTTAAATTATAAGGACTGCATGATAATTTA///ACAGCGGGTGCCGAGGCATCGACGCGAAGCACTGGAATTCGTATTGCACCACGACCCACA
A_73_P093246|522059	0.00199575	0.000217531	up	2.06012	2.06012	1.04273	RAVER2	ribonucleoprotein, PTB binding 2 [Source:HGNC Symbol;Acc:HGNC:25577] [ENSBTAT00000043383]	GAATCACAACACACATTGGAGAAGTGCATTGCTTATTCTCAGCCTTTTGGTGATTATGCA
A_73_121358	0.000655957	1.346e-05	up	2.05859	2.05859	1.04166		Rep: Predicted protein - Neurospora crassa, partial (9%) [TC472894]	TCTTCACTTTGGGCATTTCCTGAAACCTCCCCCAGCATGACTGCGACTCCAGACCTTGGA
A_73_P109441,A_73_P112166|787369	0.0350245	0.0138413	up	2.05806	2.05806	1.04128	LOC787369	PREDICTED: Bos taurus olfactory receptor, family 5, subfamily D, member 13-like (LOC788476), mRNA [XM_001255525]	TGATCTACAGCCTCAGGAACAAAGATGTGAAAAAGTCAGTGAAGAAATTAATCAACATGA///ATTGTGTTCCTAACTCCAGAAGTTCATCGCTCATGGTCAAGGTGGCCTCTGTCTTTTACA
A_73_P487918	0.00158355	0.000136831	up	2.05796	2.05796	1.04122		GB	TTTCATTGCCATGTCAACGTTCACATCGGGGCAGGAATGGAAAGCGTTTACACTGTAATC
A_73_100860	0.000512795	3.52825e-06	up	2.05761	2.05761	1.04097		Rep: Uncharacterized protein C6orf150. - Canis familiaris, partial (71%) [TC401706]	TAACAATGATGGTGGAGTTGGGCTATATTGGTTTTCTACTGTTGCATTAAACTTACCATG
A_73_115229,A_73_P058206,A_73_P457711|518795	0.00139635	0.000106951	up	2.0565	2.0565	1.04019	SOCS1	PREDICTED: Bos taurus suppressor of cytokine signaling 1, transcript variant 2 (SOCS1), mRNA [XM_864316]///suppressor of cytokine signaling 1 [Source:HGNC Symbol;Acc:HGNC:19383] [ENSBTAT00000005753]	AAACCAGGGGTTGGGGAGGGTCTCTGGCTTTATTTTTCTGCTGTGCAGAATCCTATTTTA///ACCTTCCTGGTGCGCGACAGCCGACAGAGGAACTGCTTCTTCGCCCTCAGCGTGAAGATG///TATACTCAGTATCTTTGCACAAACCAAGGGTTGGGGAGGGTCTCTGGCTTTATTTTTCTG
A_73_103132,A_73_P262801|540154	0.00539572	0.00110017	up	2.05623	2.05623	1.04	TRIM59	Bos taurus tripartite motif containing 59 (TRIM59), mRNA [NM_001080310]	TCCTGAAATGAAGATCTCTTCAAAAAGGATTCCCTGTGCCTGGCCTGATAAAGAGGAAAA///CCTAACAGCTCTTTGTGATGTTGGCAATCTGATTAAATCAAGAATATACTCCACAAATTG
A_73_P104731,A_73_P043076,A_73_P384106|784133	0.00137019	0.000103361	up	2.0562	2.0562	1.03998	RAP2B	Bos taurus RAP2B, member of RAS oncogene family (RAP2B), mRNA [NM_001102531]	AGCATGTACGTTTCTCATTGATTTTGGTTGACGCATATTTCCCCATTGAAGCAGCCCGTG///GGATGGCAGGGCAAAAGATTCTAATATGCTCTTACTGAGTACTGTAAAATAAAAGCTTTT///GAGCCAAAAGAAGTTAAAGGCCACAGGTTTCTTAAAGCTGTATTAACATATTTTGCCTTA
A_73_109036,A_73_P060586|511863	0.00184192	0.000185341	up	2.05522	2.05522	1.03929	DPYSL4	Bos taurus dihydropyrimidinase like 4 (DPYSL4), mRNA [NM_001163783]	GACAGACACCAGTGCACAGACGGCCAGATTTATGAGATCTTCAGTGTCATCCGGGACCTG///AGTTGATTAGAGACGCCGTCCTGTGTGCCAAGGGCACTGTAGTCAGGAACCTGCATGCCA
A_73_118246,A_73_P290566,A_73_P073546|407183	0.000875889	3.61343e-05	up	2.05508	2.05508	1.03919	PFKFB3	Bos taurus 6-phosphofructo-2-kinase/fructose-2,6-biphosphatase 3 (PFKFB3), mRNA [NM_001077837]	AAGCTGTGCCAGCTTTCAAACGGAAAGCCTGTCGGAAATTTGTATATTTTGCAGTTGCCA///TTGTAGAAGAAAAATGCATGTTTCTCTGATTGGGACTCAGTGGGGAGCAGGGACAGGATT///TTCATGAAGAGAATTAACTGCTATGAGGCCAGTTACCAGCCCCTCGACCCTGATAAATGT
A_73_P070906	0.0012341	8.09708e-05	up	2.05488	2.05488	1.03905		Rep: replication factor C 5 - Bos Taurus, partial (44%) [TC461106]	TATTGACCAAAATGGCAGACATTGAGTACAGACTTGCTGTTGGCACCAGTGAGAAGATTC
A_73_P067606,A_73_103627,A_73_P124696|538548	0.000738098	2.25246e-05	up	2.05471	2.05471	1.03894	FBL	Bos taurus fibrillarin (FBL), mRNA [NM_001205400]	TAATTGCATTGACTCCACAGCTTCCGCAGAGGCTGTCTTTGCCTCTGAAGTGAAAAAGAT///TGGATCGCCAGAGAGTCTGTAGCTACTGTTACACGTTTGTTTTTGTATTAAAAGACTCAT///AATCCGTTTACGGAGAGAAGAGAGTCTCGATTTCGGAGGGAGATGACAAAATTGAGTACC
A_73_118743	0.00302958	0.000449318	up	2.05347	2.05347	1.03806			GAGCAGCAAAACCCAGTCTGTACAGCAAGCTGTGCCTCTCCAAATCCTGATTTTGAAATA
A_73_P099971,A_73_P099051,A_73_114897,A_73_P034851,A_73_P100056|326598	0.00239292	0.000302803	up	2.05301	2.05301	1.03774	LGALS1	Bos taurus galectin 1 (LGALS1), mRNA [NM_175782]///BP109087 ORCS bovine utero-placenta cDNA Bos taurus cDNA clone ORCS12790 3', mRNA sequence [BP109087]	AACTACCTGTCTGCAGGTGGTGACTTCAAGATCAAGTGTGTAGGCCTTTGAGTGACATAT///TGAAGGAGATGCATACCTCCACGACACTTCCAGGCTGGAAGGGGAAGGCAGATTCCCTCT///TACCTGTCTGCAGGTGGTGACTTCAAGATCAAGTGTGTGGCCTTTGAGTGACATATGGGC///TCAAGTGTGTGGCCTTTGAGTGACATATGGGCCAGCCAGCCCATGGCCCCAATAAAGGCA///TGCCTGATGGATACGAATTCAAGTTCCCCAACCGCCTCAACCTGGAGGCCATCAACTACC
A_73_P056731,A_73_111779,A_73_P389851,A_73_P109736|539149	0.000655957	1.24117e-05	up	2.05261	2.05261	1.03746	TUBB4B	Bos taurus tubulin beta 4B class IVb (TUBB4B), mRNA [NM_001034663]	TTCTTTCCTGTCTTGACATCACGCGCTGTACAGCCACCACCATTAAAGCGTTTTCATAGT///GCCCGCTCTGATAGTCTGTCTCACTGTGTGTGTGTTCTTTCCTGTCTTGACATCACGCGC///AGACCTACTGCATTGACAACGAGGCGCTGTACGACATCTGCTTCCGCACCCTGAAGCTGA///AACAAGAACAGCAGCTACTTCGTGGAGTGGATCCCCAACAACGTGAAGACGGCCGTGTGC
A_73_P510583,A_73_113937|613948	0.0035145	0.000567782	up	2.05149	2.05149	1.03667	SLC25A40	Bos taurus solute carrier family 25, member 40 (SLC25A40), mRNA [NM_001076299]	TGCAGTTGTGTGCTGAATGATGTACAGAGTCTAAAAGAATTCCCAAGTCTTTTATACACG///GAATGGATTTTCTGGATTATTTACAGGACTGATTCCTCGTTTAATTAAAATTGCTCCTGC
A_73_P451816,A_73_108064,A_73_P287446,A_73_110595,A_73_P031416,A_73_P290141|527349	0.000852578	3.34334e-05	up	2.04973	2.04973	1.03543	RGS3	Bos taurus regulator of G-protein signaling 3 (RGS3), mRNA [NM_001077973]	CACAGCGGCCGAGTTCTGGAGCAAATAAAAGGCCTGTGTTATTTTTTGTTCTTGAAAAAA///AGGCTCAATGCACCACCTTTCCCTCTTCTTCACAGGACACAGGAAGATGAGCGGGCCTGA///AAGTCTTACACGGGCCTGGGGAAGAAGTGTCGGCTGATGAAGACGGTGCAGACCATGAAG///TCAGACCACACAGCGGCCGAGTTCTGGAGCAAATAAAAGGCCTGTGTTATTTTTTGTTCT///AATATTTTAACCAACGCCTTGTGAAAAAGCCGCCTTGCTGAGAAGGTGGGCACCATATTC///AACCAGAAGAAGATGAGTCCCCCGCTTTAGGGGCCACGTGGGTAGAGCTCAGTGTTCACA
A_73_P047651|535288	0.000655957	1.35914e-05	up	2.04888	2.04888	1.03484	ZNRD1	Bos taurus zinc ribbon domain containing 1 (ZNRD1), mRNA [NM_001046400]	ATCGTCATGTGTGGATTACCATTGTCCCCAGAGTACTCCTACCCTCATTGAGTTTCCTTA
A_73_P087221	0.013629	0.00407638	up	2.04885	2.04885	1.03482		PREDICTED: Bos taurus prematurely terminated mRNA decay factor-like (C6H4orf21), mRNA [XM_588126]	CACAACTGGACCATCTCCTTAAAGATTATCTTGAAAAACAAGCAGAAGAAAAACAGAAGA
A_73_P032706|617129	0.00108207	6.22798e-05	up	2.04733	2.04733	1.03375	MCUR1	Bos taurus mitochondrial calcium uniporter regulator 1 (MCUR1), mRNA [NM_001102309]	TTAGCAGGATCTGTATTTACGTGCCTAACAGTAGCTCTGGGATTTTATCGCCTGTGGATA
A_73_P109771,A_73_P111806,A_73_113152|505376	0.000631481	9.56833e-06	up	2.04722	2.04722	1.03367	FBXO15	Bos taurus F-box protein 15 (FBXO15), mRNA [NM_001035021]	GGACTAACTGGTTTTGTTCCTGGTGTTTGTCGTGAGTTAAAATAAAGCACTGGTCTGTTC///ACTGGTTTTGTTCCTGGTGTTTGTCGTGAGTTAAAATAAAGCACTGGTCTGTTCGGTAAA///CGGACTAACTGGTTTTGTTCCTGGTGTTTGTCGTGAGTTAAAATAAAGCACTGGTCTCCT
A_73_P073446|513420	0.038493	0.0156193	up	2.04694	2.04694	1.03347	BTBD3	BTB domain containing 3 [Source:HGNC Symbol;Acc:HGNC:15854] [ENSBTAT00000025703]	TGAAATTGACTTGGCTGCTGACACGGTCTTGGCCACTCTTTATGCTGCCAAAAAGTACAT
A_73_P252196,A_73_100435|616311	0.00463168	0.000875206	up	2.04679	2.04679	1.03337	PMF1	Bos taurus polyamine modulated factor 1 (PMF1), mRNA [NM_001038212]	TCTATCCAGGAGGAAATCTCTGAAATCAAAGCTGAGGGAAACCTGGAAGCTGTCCTGATT///ACGACGTTCAGATTCCTCCCTGTTTTCTCCTAACTTGAGGACTCTTGGCCAGCTCCTGCC
A_73_P084746,A_73_107353|513032	0.0122013	0.00353788	up	2.04632	2.04632	1.03303	N4BP3	Bos taurus NEDD4 binding protein 3 (N4BP3), mRNA [NM_001205742]	AGGCGGAACTGGCTCAGAAGCTAGCTGAGATCTTCAGCCTGAAGACACAACTTCGGGGCA///TGTGAGGAGGGGAGGCTGGAATGGGAACTTTGGCCTCCCCAGAATAAAATCACATTTTCT
A_73_P038571,A_73_P170807|509437	0.000619189	7.90873e-06	up	2.04337	2.04337	1.03095	RSRC1	Bos taurus arginine and serine rich coiled-coil 1 (RSRC1), mRNA [NM_001075404]	GGGCAGTCCTGTGGCCTAAAGTAATATTCATGTGGTTGAATTAACAGTAACATTGGAAAT///GTTCAGCAAACATTCAGATCAAGTAAAGAAATCAAAAAGGCAGTGGAAGCTAGTGAAGTG
A_73_104872	0.00161573	0.00014321	up	2.04305	2.04305	1.03073		PREDICTED: Bos taurus coiled-coil domain containing 34 (CCDC34), mRNA [XM_010812770]	GCCTTGGAACTCTATGCAAAATACAAAGATAGTAGATGTGGGAAATTACATGCTTTTACC
A_73_101003	0.00621364	0.00136636	up	2.03985	2.03985	1.02847			TGGACCCCAAGCAGCTGGTCATCAACCTGCCTCATAAAGGAAGTGGACATCTACACGGTC
A_73_P108956|281020	0.00390729	0.000676147	up	2.03946	2.03946	1.02819	BCL2	Bos taurus BCL2, apoptosis regulator (BCL2), mRNA [NM_001166486]	TGTGGAGCTGTATGGCCCTAGCATGCGGCCCCTGTTTGATTTCTCCTGGCTGTCTCTGAA
A_73_P245286,A_73_107607|514688	0.00366751	0.000611903	up	2.03944	2.03944	1.02817	PPP1R15A	Bos taurus protein phosphatase 1 regulatory subunit 15A (PPP1R15A), mRNA [NM_001046178]	TATCGACCAGGAGAAGACACGGAGGAAGAAGATGAGTATGAGGACGAAGATAATGAATCA///GTAGTTTTTGTGTTAACTATTTATTTATTTGAATGTAGGTTTATATAATAAATAAAGCTT
A_73_P277341,A_73_106703|537689	0.00214636	0.000247321	up	2.03775	2.03775	1.02698	AFG1L	Bos taurus lactation elevated 1 (LACE1), mRNA [NM_001192915]	TTCAGGTCACTGACATTGCTGATGCCATGATTTCTGAAACAGCTTTTTGAAATCTGTTCA///TGCAGGAAAACTCTACTACCTCACAAGTGAAGCTGATGTGGAGGCTGTCATGGATAAGTT
A_73_P068136|504258	0.00572749	0.00120474	up	2.03764	2.03764	1.0269	SIGLEC10	Bos taurus sialic acid binding Ig like lectin 10 (SIGLEC10), mRNA [NM_001206277]	AGCAATTGGGATGAGAACAGAGTGTGGTCTGTCTCTCTCTCTTTTTAATCCTCCGAGGAT
A_73_118041|282654	0.00408884	0.00072444	up	2.03742	2.03742	1.02674	TNXB	Bos taurus tenascin XB (TNXB), mRNA [NM_174703]	TTCGATTTCTCAGTGCCCTTCACGGAAATGAAGCTGAGACCAAGAAGCTACCGGCCCCTG
A_73_P191282|781658	0.0160505	0.00506266	up	2.03602	2.03602	1.02575	CORT	Bos taurus cortistatin (CORT), mRNA [NM_001204896]	CTCCACCCATAACTACTCATGCAAAGAAGTGTAACCATGGATCTGAATAAAATGTATTAA
A_73_P032041|506275	0.00140023	0.000107666	up	2.03449	2.03449	1.02467	WBP4	Bos taurus WW domain binding protein 4 (WBP4), mRNA [NM_001075251]	GTGTTTTTTGGACATAATAGAGACTGTACATCTGTAAAAGCTCCTCTGTGTTTGTTTTAC
A_73_P060746|618360	0.00132715	9.56539e-05	up	2.034	2.034	1.02432	DDIAS	DNA damage induced apoptosis suppressor [Source:HGNC Symbol;Acc:HGNC:26351] [ENSBTAT00000015454]	ATTTTCAGAAAACTGGTCACCGTCAGCACCTGAAAGTAAAAGTGCGTGGTCTCCTGAACT
A_73_P047636,A_73_P378296|506727	0.00793158	0.00194033	up	2.03332	2.03332	1.02384	NFKBIE	Bos taurus NFKB inhibitor epsilon (NFKBIE), mRNA [NM_001130746]	CTTCTGGGGAAGGGGAAGTTCAATAACATGACACTAAAACGGCAGAGACTTTTAACTCCC///TTGGACATTCAGAACAACCTTTACCAGACAGCACTTCATTTGGCTGTACATCTGGACCAG
A_73_100379	0.00176695	0.00016864	up	2.03207	2.03207	1.02295		Rep: Nuclear receptor coactivator 3 - Homo sapiens (Human), complete [TC398959]	TTTGAGCAGGACTGAATTTTAACCTGAAGTGTGATATCTGCCTGTTTTCTTTCCCTCCTC
A_73_P078776|523454	0.0102507	0.00278192	up	2.0319	2.0319	1.02283	WWC3	WWC family member 3 [Source:HGNC Symbol;Acc:HGNC:29237] [ENSBTAT00000018367]	ATAGCATTTTTTACAAGACCAAGGATTAACGTACCTCCTCTGCCTGCCGATGATGTTTGA
A_73_P044426|787049	0.000944772	4.43079e-05	up	2.03148	2.03148	1.02253	FAM122B	Bos taurus family with sequence similarity 122B (FAM122B), mRNA [NM_001083794]	GAGATGCTAGCCTTCAGATGAGCTTTGGTGACAGTACTTTATTTTTATATATGGTCTAAT
A_73_P326136,A_73_P182002,A_73_P253661,A_73_P044081|520277	0.000512795	3.33733e-06	up	2.03099	2.03099	1.02218	CALM3	Bos taurus calmodulin 3 (CALM3), mRNA [NM_001046249]	AAAGCAACAAAAGATTTGTCCCAAGCTGCATGATTGCTCTTTCTCTTCCTCCCGAGTCTC///ATTGGCTGCTCTTGTGAAGCATCAGACTGGCTCCTTGAGGCGGGGTGAGTGGGGCCAGCT///TTTATACTCCTTAAAACTCTTAATTTTGTCTGAAACCATGCCGGGCTAGCTGAGGGGCGG///GTAAGGGCAGGTAGGCGTGAAGCTGTGGACGTTTTCGGAGTGTTTTGGTTTTTCTTTTTT
A_73_110580|616377	0.000797817	2.81768e-05	up	2.02965	2.02965	1.02123	CDA	Bos taurus cytidine deaminase (CDA), mRNA [NM_001193110]	AGTTTGGCACCGACTGGGCTGTCTACATGACCAAGCTGGACGGCACGTATGTTGTCAGGA
A_73_P168932	0.0191351	0.00636181	up	2.02713	2.02713	1.01944			GAAGTGTGATGTGATCATTAGGGTATTTTTTCAGTTTGTTGTGTTGTGAACCAAATCCAT
A_73_P490583	0.0191754	0.00637818	up	2.02683	2.02683	1.01923		CES007147 Bos taurus skin cDNA library Bos taurus cDNA clone CCL007147 5', mRNA sequence [CF762825]	GATAGTGGTCTGCAGTCCGGGCGCTCTGGCTGTGGCCAGGGATCTGGAGGCTGCTGCTGA
A_73_115139,A_73_P071411|528108	0.00764521	0.00184235	up	2.02491	2.02491	1.01786	SCARF2	PREDICTED: Bos taurus scavenger receptor class F, member 2 (SCARF2), mRNA [XM_606519]///scavenger receptor class F member 2 [Source:HGNC Symbol;Acc:HGNC:19869] [ENSBTAT00000025815]	AGTCTGGAGCCGCCGGGCGGGAGGCTGCATCTCGCTGGTTCAGGCCCCGCGGCCCTCCTG///TCCTTCTCCTCCTTCGATACCACAGACGAAGGCCCCGTGTACTGCGTACCCCACGAGGAG
A_73_P205932	0.00796513	0.00195097	up	2.02435	2.02435	1.01746		Rep: Prostaglandin F synthase-like1 protein. - Bos Taurus, partial (62%) [TC462112]	GGCTTTTCTTATGATTTTCCTGTAGAAATGTGTGTGTGTGTTTTCACTTACAAAGGGAAA
A_73_P421121	0.00125871	8.46931e-05	up	2.02349	2.02349	1.01684		minichromosome maintenance complex component 2 [Source:HGNC Symbol;Acc:HGNC:6944] [ENSBTAT00000019121]	ATCGGGGAGAAGATCTTTGCCAGCATCGCTCCTTCCATCTACGGGCACGAGGACATCAAG
A_73_P396381	0.0300259	0.0114168	up	2.02327	2.02327	1.01669		immunoglobin superfamily member 21 [Source:HGNC Symbol;Acc:HGNC:28246] [ENSBTAT00000025516]	AACTATTTCCAGTCTTGTTCTTAGTCTCTTTCTGTCCGTGTCTTGGCTCCTTCGGTCAAT
A_73_P110346,A_73_116270|286872	0.000999566	5.11652e-05	up	2.02255	2.02255	1.01618	MSX1	Bos taurus msh homeobox 1 (MSX1), mRNA [NM_174798]	GGTGGCTCTCAAGATTCCCTTTGGAAGGGATTGTTGTAATATACTGTATATTTGAAATTT///CTTCTGTTTCTATTTAACAGTACATGTGGGTGGCTCTCAAGATTCCCTTTGGAAGGGGAT
A_73_102379|515639	0.00054871	4.50667e-06	up	2.02024	2.02024	1.01453	RASSF8	Bos taurus Ras association domain family member 8 (RASSF8), mRNA [NM_001024549]	GCTGTAATGCCAAGCCTTCATTTTTATTTGTAGCATTTTGAGAGCATTAGGAAAGTGTTA
A_73_118566|521795	0.020589	0.00700979	up	2.0199	2.0199	1.01428	SLFN11	GB	ATACAACATTCTTGTCTGTCTGGCATCCAGAGCGAATCAACAGCTACATATTCTGTGGCA
A_73_P086671,A_73_108008|513392	0.000509628	1.97476e-06	up	2.01979	2.01979	1.0142	KIF24	Bos taurus kinesin family member 24 (KIF24), mRNA [NM_001193229]	TTGTGATCCAGCTAGATGAAATCATGGTTCTGAAGTCCAAGTGCATCCAGAGTCTGAGGA///ATCTGCCCCACCAGCCCTCGGGAGGTTAGCTTCTGAAAATGTAAAATGAATAAACCGTAA
A_73_116866	0.0121546	0.00351973	up	2.01689	2.01689	1.01213			CTGAGAATTTGCACTTTAAGTATTTGTGTGCGTGGTTTTAGCCAAATGAAGTGTTATCAG
A_73_118377	0.000655957	1.31856e-05	up	2.01676	2.01676	1.01204		HW_Fat_55_050811_G08 Bos taurus CF-24-HW fat cDNA library Bos taurus cDNA, mRNA sequence [DV780751]	GTTTTACTCTGGTCTGTAAGTTATTCAAAATTACCTTTTCATATCTGTGGCCTTGAGTTC
A_73_P184962	0.00588818	0.0012583	up	2.01655	2.01655	1.01189		LB02720.CR_M21 GC_BGC-27 Bos taurus cDNA clone IMAGE:8313791, mRNA sequence [DV891585]	ACAACTGCATTTGTTAACGTCACGTCAGGGAATGAGAATCGCGGAAAGACTCTGCTTGAT
A_73_P423381,A_73_P048721|519474	0.000863339	3.48279e-05	up	2.01626	2.01626	1.01168	TERF1	Bos taurus telomeric repeat binding factor 1 (TERF1), mRNA [NM_001076865]	AAGTGTTAGTGACAGACAGTCTGCGGTAACTGAATCCTCATGGGGTACAGTATCCTTATT///CACACCTTATTGGACAACTTTTGAGTTTTTACCAACGTGGTCTTTAGAGAATTTGTCAAA
A_73_P205457|789200	0.0493679	0.0212194	up	2.01541	2.01541	1.01107	PRR33	PREDICTED: Bos taurus uncharacterized LOC789200 (LOC789200), mRNA [XM_001256022]	GTCCTGAACCCCCAGCCCAAGAACTTCAACCGGACGGCGGCTGGCTGGAGGCTCCACTGA
A_73_109017	0.00198675	0.000215188	up	2.01433	2.01433	1.0103		Rep: UPF0491 protein C1orf80 homolog - Macaca fascicularis (Crab eating macaque) (Cynomolgus monkey), partial (5%) [TC415655]	CACGTTGATTAGCTTTTTTCCTACATCACATTGTTATTCTTTCTGATAGTGATTCTAGGG
A_73_112437	0.0454182	0.0191691	up	2.01411	2.01411	1.01014		Wnt family member 7B [Source:HGNC Symbol;Acc:HGNC:12787] [ENSBTAT00000012540]	CTTCCTGCGCATCAAGCAGCTGCGCAGCTACCAGAAGCCCATGGAGACGGACCTGGTGTA
A_73_121229|504763	0.00117807	7.30353e-05	up	2.01397	2.01397	1.01004	FAM49A	Bos taurus family with sequence similarity 49 member A (FAM49A), mRNA [NM_001075172]	GGCAGAATTTGGAGACGTTGATCTTTGCTACTGGAGTTCCTAACGCCTGTAACAATCAGA
A_73_104842	0.00410957	0.000730753	up	2.01334	2.01334	1.00959		PREDICTED: Bos taurus uncharacterized LOC100847194 (LOC100847194), miscRNA [XR_139442]	ATTCTGTTGGTGCATTGCTTTTCTGTATTCAACTTTCCTATGAATTGAGCTGTGAACCGA
A_73_P037781,A_73_P270741|535190	0.000509628	2.16304e-06	up	2.01328	2.01328	1.00955	TRIM13	Bos taurus tripartite motif containing 13 (TRIM13), mRNA [NM_001038165]	GAGTTTTACTTTGGTGGTGCTGAACAATGTGGCAGAATTTGTGTGCAAATATAAACTATT///AGTTGCTGACTAAAGATTCGGATAAAGTGAAGGAGTTTTTTGAGAAGTTACAATACACGT
A_73_P068846,A_73_106717|507483	0.0015602	0.000131928	up	2.01237	2.01237	1.00889	ASB7	Bos taurus ankyrin repeat and SOCS box containing 7 (ASB7), mRNA [NM_001192151]	CTTCAAAACCTAAAACTACTTGATGAACTACCAATTGCCAAGGTCATGAAAGACTACTTA///TTGCCTTGCACAAAGTATATCCTATGCAATTTCTGATTTGCTGTGAAGTCAGAAAGCAGG
A_73_109398,A_73_P092251,A_73_P100586|522383	0.00243974	0.000312721	up	2.01221	2.01221	1.00878	NES	Bos taurus nestin (NES), mRNA [NM_001206591]	CCTCCATAGACCTGCCATGTTGTGGCCCCGTCTGGCTCATCCCCGCCTGAATAAAGTAAT///TTCCTGAAGTTCAGTCAGAGAGAAGGTGATGGAGACTCCTGGTCCTCAGGGGAGGACTAG///AAGCGGTTCCAAGGCTTCCCTCAGCTTTCTGGACCCTAAGCTGGAGCTACATTTCCCTGG
A_73_112785,A_73_P097061|100335468	0.0132239	0.00392398	up	2.01151	2.01151	1.00828	TSPEAR	Bos taurus thrombospondin-type laminin G domain and EAR repeats (TSPEAR), mRNA [NM_001206810]	GTGATCTCTTCCCGGAGGAATTTTCCATCGTTGTGACCTTGAAAGTCCCCAGCCTCCCCC///CCTCACATATTTGTACCAGCTATTTATTGTGTTCTGTCTATTTATGATGCTTCCTACAGA
A_73_113394|538615	0.000609441	7.67892e-06	up	2.01142	2.01142	1.00821	THAP1	Bos taurus THAP domain containing 1 (THAP1), mRNA [NM_001034648]	AGTCTTTGTAAGAAATGGGAGGCAGCTGTCAGAAGGAAAAACTTTAAGCCCACCAAGTAC
A_73_P286311,A_73_106849|541271	0.0353581	0.0140068	up	2.01112	2.01112	1.008	TUBB1	Bos taurus tubulin beta 1 class VI (TUBB1), mRNA [NM_001144100]	TGTGCTCAACTCTGACGCCTGCTTCTGCATCGACAACGAGGCGCTCTACGACATCTGCTT///CCAGGATTTGGTGTCCGAATACCAACAGTTTCAAGATGCCAGAGCAGATGTGGAAGAGGA
A_73_114743|282005	0.00100015	5.13859e-05	up	2.01101	2.01101	1.00792	PROCR	Bos taurus protein C receptor (PROCR), mRNA [NM_174437]	AGATTTGGGAAGAGACACTGGTGCAATAGAGGTAGTGGTAACCAGAGAAATGATGAAAGT
A_73_P063886|511901	0.00258881	0.000345532	up	2.01075	2.01075	1.00774	H1FX	H1 histone family member X [Source:HGNC Symbol;Acc:HGNC:4722] [ENSBTAT00000052022]	TCCGTCAAAGAAGAGGAAGAATAGCAAAAAGAAGAATCAGCCGGGCAAGTACAGCCAACT
A_73_P034926,A_73_P279606,A_73_P345726,A_73_P265101|510368	0.00786893	0.00191722	up	2.00846	2.00846	1.00609	LRRFIP2	Bos taurus LRR binding FLII interacting protein 2 (LRRFIP2), mRNA [NM_001038070]	TGAGCTTTGGCATTCAGATAGCCACCTTTGTATTTTCTAATTTATGAGAGAATGAAACAG///ATACCCTAAAGGATGTTATTGAAGAGCAGGAGGAACAGATGGCGGAATTTTATAGAGAAA///AAGACCGATTTTCTGCAGAAGATGAAGCTTTGAGTAACATTGCCAGAGAGGCAGAGGCAA///AAACTCGCTGGGGAAAAGGAAGAGCTACTATCACAGATTAGAAAGCTGAAGCTGCAGTTG
A_73_P105876,A_73_P082346,A_73_P082341,A_73_P109261,A_73_106334|337925	0.0134145	0.00399279	up	2.0078	2.0078	1.00561	SLC8A1	Rep: SLC8A1 protein - Bos taurus (Bovine), partial (36%) [TC480952]///Bos taurus solute carrier family 8 member A1 (SLC8A1), mRNA [NM_176632]///solute carrier family 8 member A1 [Source:HGNC Symbol;Acc:HGNC:11068] [ENSBTAT00000018452]	GGTGCACTAATTGTGCTGTTCCTTATAAATGGTACACATTATTGACACAGACAAATAAAG///TTCTGAGAACATCTGGAGCACGTGGAAATGTTATCGTTCCCTATAAGACCATTGAGGGGA///TTTTCTGTCACTCTCTTCACCATTTTTGCTTTCATCAATGTGGGGGTGCTGCTGTATCGG///TCACAATAACAGATGAATATGATGACAAGCAGCCACTGACCAGCAAAGAGGAGGAAGAGA///ACAAAGTCCTTTCTTATCTCTTCAGCGCTGGACTGTGATTAGCAAGGCCCTGATTCTGAT
A_73_P092706|539794	0.0362942	0.0144964	up	2.00666	2.00666	1.0048	DCLRE1B	DNA cross-link repair 1B [Source:HGNC Symbol;Acc:HGNC:17641] [ENSBTAT00000004713]	TACAAATGAGAAATTCCTTTCTCTGGAAACTGGGGAGGAAATTGGTGTAGGGCCCTACTT
A_73_P440316,A_73_P279291,A_73_117691,A_73_P421616|535383	0.000619708	7.97158e-06	up	2.00657	2.00657	1.00473	RAPGEF3	Bos taurus Rap guanine nucleotide exchange factor 3 (RAPGEF3), mRNA [NM_001080302]	AACTGTGTTGTTCAGCCAGGGGGACAAGGGCACCTCGTGGGACATTATCTGGAAGGGATC///ATCAGAGTTGGGGACAAAGTCCCCTATGACATCTGCCGGCCAGACCACTCCATGCTAACC///GGGGACAGAGAGGCCCTGGAGTGAGTGGGAGAGCAGAGCGTTTTCTCTCTTTGTGTTCAA///AACATGGTGCTCAAGAGGATGTATCGGTCCCGAAGCTGCTCCTACCAGCTGCTGCTCGAA
A_73_P040461,A_73_P318881,A_73_102312|539924	0.0009208	4.17394e-05	up	2.00621	2.00621	1.00447	MCM7	Bos taurus minichromosome maintenance complex component 7 (MCM7), mRNA [NM_001025345]///PREDICTED: Bos taurus minichromosome maintenance complex component 7 (MCM7), transcript variant X1, mRNA [XM_005225185]	CAAGCTGCACTTGTTTTACTTATTCTTTTTTCCTAATAAAGCGTGTGTCCATTTGCTGCT///AACTTATCTGGAAGCTCATCGGATTGTGAAGATGAGTAAGAGTGAGGAGGATGAGTCTGG///TTACTTATTCTTTTTTCCTAATAAAGCGTGTGTCCATTTGCTGCTTCTGTTAAAACAGGG
A_73_P032306,A_73_P064971|617294	0.00146937	0.000118279	up	2.00216	2.00216	1.00156	RPH3AL	Bos taurus rabphilin 3A like (without C2 domains) (RPH3AL), mRNA [NM_001035494]	TTTGGCAGAAAAACACTTAATTCAGGGTGCAGGCGATGCTTCTGGAAAACCCTTCCTGTA///TCTCCCAGCCAGAAACGGCCCCTGTGGTTGTGTAAGATCTGCAGTGAGCAGAGAGAGGTA
A_73_102001|538690	0.0015561	0.000131411	up	2.00215	2.00215	1.00155	ID3	Bos taurus inhibitor of DNA binding 3, HLH protein (ID3), mRNA [NM_001014950]	ATGCGATGTATATTAAACTTTTTATAAAAGTTAACATTTTGCATAATAAACGGTTTTTAA
A_73_P080756,A_73_102973|517053	0.00187814	0.000192569	up	2.00099	2.00099	1.00071	TDP1	Bos taurus tyrosyl-DNA phosphodiesterase 1 (TDP1), mRNA [NM_001193155]	CTTTCAGACGTGAACGTTGGTTATCCTTTCAATGGTCACTGTTGACATTCTCACTTGAAA///GCAGCACAGACTCAGTTTCAGAAGCTTCACCTTGCAAAAGACAGAAGACCGGTTCCCAGG
A_73_P443111,A_73_100084|539760	0.00292026	0.000424547	up	2.0008	2.0008	1.00058	ILF2	Bos taurus interleukin enhancer binding factor 2 (ILF2), mRNA [NM_001038187]	AATATCTACCTGGGATGGAGTGATAGTGACACCTTCAGAAAAGGCTTATGAGAAGCCACC///CCAGCTCCTGAAACCTCTCTCAGCCAGTACTTTGTTGTTGAAATGTTGTGAACTGTGTTT
A_73_118080|353245	0.00820657	0.00203241	up	1.99942	1.99942	0.999584	CEP57	Bos taurus centrosomal protein 57 (CEP57), mRNA [NM_181450]	GGACCACAAATAAGAAGGACTTCGCCAAACCGAGACCTGGAGAAAAAAGCAGGAAAAATC
A_73_108314	0.00132154	9.45036e-05	up	1.9988	1.9988	0.999133		Rep: IRX3 protein - Bos taurus (Bovine), partial (36%) [TC423352]	GTGTGAACCAAATTGTACAAGAAAGTATCTATTTTTGGCTAAATAAATGAGCTGTTGCCA
A_73_P103866,A_73_P056316|767890	0.0242557	0.00866801	up	1.99879	1.99879	0.999127	LOC767890	Rep: Membrane transport protein XK (Kx antigen) (Kell complex 37 kDa component) (XK-related protein 1). - Canis familiaris, partial (89%) [TC393286]	CCTCAAAGTACCCCTAAAGGAATATAATAATTAGCAATGAGTTGTAGAACCTTTTTTGGC///TGGGTCCTAAAGCCCTTTTCTCGACGCTTCTGTGGAAAACCTTCACATCCCTTCAAAAAT
A_73_P049336,A_73_P411651|521806	0.0128698	0.00379688	up	1.99836	1.99836	0.998819	DLX1	Bos taurus distal-less homeobox 1 (DLX1), mRNA [NM_001099017]	CAAAATTTCCTCATCTCGGGAAGAACGCGTGATCACTTTTCCTGGTTAAGAAGAAAGATC///AAGGCGGTGTTTATGGAGTTTGGGCCGCCCAACCAGCAAATGTCTCCTTCTCCCATGTCC
A_73_120018|505302	0.000886201	3.80526e-05	up	1.99624	1.99624	0.997288	DUSP12	dual specificity phosphatase 12 [Source:HGNC Symbol;Acc:HGNC:3067] [ENSBTAT00000028997]	TCCGTGGCAGATTGTGTAGTTTTTAGGCTGTTAACATTTCATTTGCAATGTGAGAAGATA
A_73_P461961,A_73_109431,A_73_P111061|506277	0.00164993	0.000148315	up	1.99475	1.99475	0.996209	TMA16	Bos taurus translation machinery associated 16 homolog (TMA16), mRNA [NM_001035034]///Rep: Reverse transcriptase-like - Bos taurus (Bovine), partial (21%) [TC424383]	GTGCTAGTGATGCAGTGCCCAAGAAGTGTAAGAAGAAAGCTGTGACAACTATAGATGGAG///AACTGAAAGATGAGTCCAGTGACACAGATGAGGAAATGACTGCGGTGGCTTAAGTGTCTT///CTTAGCAGGCACACACATGCACAGCAGATGTATGTTTAAGTAAATAAGAAATTGAGTTTT
A_73_P064466|529318	0.00630326	0.00139494	up	1.99322	1.99322	0.9951	MEX3C	mex-3 RNA binding family member C [Source:HGNC Symbol;Acc:HGNC:28040] [ENSBTAT00000019818]	GAAAAGAGAACGCCATCATGTCCAGTTTGCCAGACAGCTGTTACTCAGGCAATCCAAATT
A_73_P057466|540146	0.029436	0.0111253	up	1.99316	1.99316	0.995061	SPIN4	spindlin family member 4 [Source:HGNC Symbol;Acc:HGNC:27040] [ENSBTAT00000023863]	GTGGCCAAGCCATCTGTCTACTTCATTAAGTTTGATGATGATATTCACATTTATGTCTAT
A_73_103226	0.000655957	1.29067e-05	up	1.99292	1.99292	0.994882		Rep: Histone H3 methyltransferase DOT1 variant c - Mus musculus (Mouse), partial (3%) [TC456101]	CTCGCTGGGGCCCAGCTCCAGCCTGTACTGTCCATAGTTTTAGATAAAGTATTTATCATT
A_73_P070656,A_73_105894|785457	0.00347505	0.000558103	up	1.99172	1.99172	0.994014	POLE	Bos taurus DNA polymerase epsilon, catalytic subunit (POLE), mRNA [NM_001191429]	TCAGAAGAAAGTCACAGGCTCTCGGAACTCTACTGAGCTCTCAGAAATGTTTCCTGTTCT///CCCTCGGGGAGCAGGTCACACAGCCCAGAAGTGTGAACCAGTCAGAGCAAGAATTGACTT
A_73_101115|767858	0.00682193	0.00156451	up	1.9916	1.9916	0.993927	MIS12	Bos taurus MIS12, kinetochore complex component (MIS12), mRNA [NM_001076969]	AAAGGAGTTTCTCAGTAGGTGGACGGTATGGGATTTATATCGACGATATTCTTAATCCTA
A_73_P404801,A_73_P049286,A_73_P262346|100125914	0.00862759	0.00217003	up	1.99137	1.99137	0.993759	NT5DC1	Bos taurus 5'-nucleotidase domain containing 1 (NT5DC1), mRNA [NM_001105485]	CAGAACAATGGTCAAAAACCATTTGATTTTTGGAAGGACATAGTTGCTGGTATACAACAT///CTCCATTGGTCTTATCAAATGCTGGAAAACTGACAGCCAAATAAACTATCTTTACCAAAA///TAAACCTGGCTGGTACTCCCAAGGGAACGCTGTCCACCTTTATGAACTTCTGAAGAAAAT
A_73_P324341,A_73_107634,A_73_P365756|532824	0.00465908	0.000882488	up	1.99131	1.99131	0.993717	EEFSEC	Bos taurus eukaryotic elongation factor, selenocysteine-tRNA specific (EEFSEC), mRNA [NM_001083464]	AAGAAGATGCAGAAGACCCTGGAGAGCACCAAGTTCCGCGGCGCACCTGTCATACCTGTT///CGTCTTGAAAGGCTCCGGGTGTCCCAGGCTGCCCAGTTGGCAGCCGCAAATAAATGCCCA///AGCCCGTGCTGGACTCCTTCGACTTCTCCCGCGAGTACCTCTTCCAGGAGCAGTACCTCT
A_73_P146266	0.00571244	0.00119875	up	1.99088	1.99088	0.993409		Rep: Uncharacterized protein ENSP00000339522 - Homo sapiens (Human), partial (5%) [TC419868]	GTTTTTACATGGGTTTGTTTTCAATAAAGTGTGACACTGCTGTCCAAAAGCCGACAAAAA
A_73_P044936,A_73_P170362|519269	0.000698085	1.75261e-05	up	1.99057	1.99057	0.993178	RRAS2	Bos taurus related RAS viral (r-ras) oncogene homolog 2 (RRAS2), mRNA [NM_001099010]	GCATTTCACTGTTCTTGGCATTTTAATTTAACTCTTTTTCACAGCCATGTTGAGAGTGAA///CAAAATACCAAAATGCCTATTGGATTTATAGGGTTAAAAACTGCGTGTAAAGCCTTTGCT
A_73_106078	0.00532709	0.00107717	up	1.98965	1.98965	0.992514		CR848869 Normalized and Subtracted bovine endometrium tissues (bcbp) Bos taurus cDNA clone bcbp0001.m.21 5', mRNA sequence [CR848869]	GTGTGAGTATATATTTGCGTTTTAAATTTCAAAGAAAGCTATATTGTCTAACAGGGGACC
A_73_P272761,A_73_109047|538719	0.00747421	0.00178862	up	1.98952	1.98952	0.992422	ERI2	Bos taurus ERI1 exoribonuclease family member 2 (ERI2), mRNA [NM_001205577]	TGATCCCAGCATATATGGTGGGGAGCCTAAAAATTCAATAAAACCTTACAAGAAAATTCC///TAGTTCTATCTGATTCCCCAGGAGGACTCACTTTTAGTTCTTTAGAAACAAACCTTATTT
A_73_118769	0.00230383	0.000283727	up	1.9893	1.9893	0.992264		Rep: PREDICTED: interferon regulatory factor 2 binding protein 2 isoform 2 - Pan troglodytes, partial (81%) [TC398729]	AGATACCTTTCCTTGGCCACCAAGTATTTTAAAAGTGTGCCACCTTTTAACCTTTACTTT
A_73_102298	0.00051854	3.6798e-06	up	1.98923	1.98923	0.992209		Hw_loin_8_050812_G06 Bos taurus CF-24-HW loin cDNA library Bos taurus cDNA, mRNA sequence [DV794512]	ATAGCATATGCCGCACAGTCTCTGAATAGGGGCCAACATGATAGCCTTGAAACCTGTAAA
A_73_P202857,A_73_P047236,A_73_P061777,A_73_P203707|506916	0.000682395	1.64832e-05	up	1.98699	1.98699	0.990585	NUP54	Bos taurus nucleoporin 54 (NUP54), mRNA [NM_001075285]	CAACATTGTATGCCCATTTTGAACAAACCAATATTAAAACACAATTGCAGCAACTTGGTG///GCCTGTACTCTGCTTTCCATAGCAAGTAAATATGAAATGTCTACTTTGCACATAACAAAA///AAAGATGACTTAGAAGATATCAAGTTGGTAGAACATGGATTGAATGAAACCATCCACATC///GTGCCCTTTCTGCTCCAACACTACTGGGAGATGATAGAGATGCTATTTTGGCAAAATGGA
A_73_P178337,A_73_108889|539464	0.000655957	1.27373e-05	up	1.98649	1.98649	0.990221	PCDH18	Bos taurus protocadherin 18 (PCDH18), mRNA [NM_001102229]	CTTGTAATATGAGAGGTGTCCCAAGGAAATAGAATCTTGTCCTTTAAATGGATAACTGTA///TCTCTGTGTGGAATGCCTTGGTAAGGGACATTGGTGTTATGACTGTTCTCGTTTATGACC
A_73_100840	0.038279	0.0155164	up	1.98624	1.98624	0.990043			CCTGTGTGTATATATGCAGAAAAGTATAATCGGTGTGGTCATGAACTAAAGAGCTGTTTA
A_73_P090561	0.000667089	1.50201e-05	up	1.98491	1.98491	0.989071		methionine sulfoxide reductase B3 [Source:HGNC Symbol;Acc:HGNC:27375] [ENSBTAT00000060985]	ACGACGTGATCAATTCTGATGCGATCACATTCACAGACGACTTTTCCTATGGGATGCACA
A_73_114327,A_73_P253136|509965	0.00123983	8.20044e-05	up	1.98332	1.98332	0.98792	CMPK1	Bos taurus cytidine/uridine monophosphate kinase 1 (CMPK1), mRNA [NM_001046044]	AAATCCGTAGCAGTGGAACCTTGAAATGCATGTACTTAGATTTATAAAAGTGATTCGGTT///ATTCCAAAGGAACTTTTTGTGTAGTCAGTTCTTGCACAATGTGTTTGGTAAACAAACTCA
A_73_P345276,A_73_P038151|514216	0.00173292	0.000162041	up	1.98314	1.98314	0.987789	TCF19	Bos taurus transcription factor 19 (TCF19), mRNA [NM_001083684]	CAGAGTTCTACTTGTTTCAGCAAGTCCGAGTCAAACCTCAAGATTTTGCTGCCATTACCA///TTCTCAGAGCTTTGCTTCCATTTCCAAATAAAGAATGAGCAGCTTTATACGCTCTAAAGT
A_73_115815	0.00992267	0.00265128	up	1.98314	1.98314	0.987783		Rep: Monocyte to macrophage differentiation-associated - Bos taurus (Bovine), partial (57%) [TC465726]	GATAATTCTTGTATAGTGCCTTCCTCTCAGCCCTACCCTGATAACGCCAGTAATAAAGGC
A_73_P037106,A_73_P101576|282107	0.000629314	9.48425e-06	up	1.98193	1.98193	0.986907	UBE2A	Bos taurus ubiquitin conjugating enzyme E2 A (UBE2A), mRNA [NM_001105325]///Rep: Ubiquitin-conjugating enzyme E2 A - Homo sapiens (Human), complete [TC462528]	ACATGTTGGCTGTGACAGGCTTGTCTTTTGTGAAAATAAATCCTGATGAATCGCAAAAAA///TTTTAACATCCATACAGTCTCTACTGGATGAACCCAATCCCAATAGTCCAGCAAATAGCC
A_73_P461321,A_73_P044456,A_73_P444066|539594	0.000726174	2.13608e-05	up	1.98142	1.98142	0.986534	BUB3	Bos taurus BUB3 mitotic checkpoint protein (BUB3), mRNA [NM_001076177]	TAACGAGTTCAAACTGAACCAACCCCCCGAGGACGGCATCTCCTCAGTGAAGTTCAGCCC///CACGGAACATCCTGAAGATGGTATCTTCATTCGCCAAGTGACAGATGCAGAAACAAAACC///TGTGCAGCTTGAGGTCTTTCTGTAAAATAACCTAAACCTGTTATTTCCATGCTGTCTAAT
A_73_108242	0.00147216	0.000118665	up	1.98075	1.98075	0.98605		Rep: MGC152581 protein - Bos taurus (Bovine), complete [TC405494]	AAATTTCTTACGGGGGAATTTTTTGTTCGTTTATTTTAGTAGCTGATGCTGGCACATCAT
A_73_119770	0.00188058	0.000193097	up	1.98054	1.98054	0.985897		Rep: Erythrocyte membrane protein band 4.1 like 4B - Homo sapiens (Human), partial (22%) [TC456631]	GTCTGTGTTTATTGTATTGCCGTGTACCTTATGTTTCTTTGTTATTTAATGAATGGGACC
A_73_103782|614512	0.00201274	0.000220685	up	1.98033	1.98033	0.98574	FANCL	Bos taurus Fanconi anemia complementation group L (FANCL), mRNA [NM_001076332]	AGTTGAAGGCGAAGTACCCTGCTGAATCACCAGATTGTGTTGTGGATTTTCCTGTTCCAT
A_73_P034646,A_73_P308751,A_73_P464031|615074	0.00178925	0.000173862	up	1.97975	1.97975	0.98532	PRKAR1A	Bos taurus protein kinase cAMP-dependent type I regulatory subunit alpha (PRKAR1A), mRNA [NM_001076358]	CCGTTTTTATTTTGGAGCATTACTGAGTGCTCACACAGTTAAATAAATAGAAGGGTTCTC///TATTGCTGGAGAGACTGTTATTCAGCAGGGTGACGAAGGGGATAACTTCTACGTGATTGA///TTTTGGAGCATTACTGAGTGCTCACACAGTTAAATAAATAGAAGGGTTCTCTGGAAAAAA
A_73_P074581	0.0172172	0.00556861	up	1.97961	1.97961	0.985218		regulating synaptic membrane exocytosis 4 [Source:HGNC Symbol;Acc:HGNC:16183] [ENSBTAT00000004383]	ATAACCAGGTGCTGCTGTTTCCTGAGAGTCCCCAGGGCAAAGTCCTGCAGGTGATCGTGT
A_73_P086466|509776	0.00230455	0.000284856	up	1.97869	1.97869	0.984542	DCAF10	DDB1 and CUL4 associated factor 10 [Source:HGNC Symbol;Acc:HGNC:23686] [ENSBTAT00000019879]	GTCAAATAAGGAACTCTACTGGTGTTCGACTTCTGTATACTTCAATTTAGGTGAAGTATT
A_73_P108906,A_73_111882|281584	0.00365307	0.000606997	up	1.97856	1.97856	0.984453	ABCA4	Bos taurus ATP binding cassette subfamily A member 4 (ABCA4), mRNA [NM_174221]	TCTCCTGGGTGTGAACGGAGCTGGCAAAACCACCACATTCAAGATGCTCACTGGGGACAC///GTGGCCTCCATACTGCTCTCATTTCAAGTGGATCTGCTTTTTGTGTGTGTGTACGTATGT
A_73_P058871,A_73_117006|104968570	0.0230864	0.0081333	up	1.97685	1.97685	0.983203	ZNF316	zinc finger protein 316 [Source:HGNC Symbol;Acc:HGNC:13843] [ENSBTAT00000005167]	CACCTGCTCACCCACATGAAGACGCACCGCGGCGCGGCGGGCGCGCCGGTCCAGGCGCCC///CGGGCGGAACGAGCTTTGGCTCCGAGCCGACGGCCGCCTTCGCGGGGCCTTCGGGCGCCT
A_73_P078471|508424	0.00127341	8.80573e-05	up	1.97684	1.97684	0.983197	PIM2	Bos taurus Pim-2 proto-oncogene, serine/threonine kinase (PIM2), mRNA [NM_001206378]	CCCTGCCTGGATTATTTAAAAAGCCATGCGTGGAAACCCACTATTTAATAAACGTAATAG
A_73_116724,A_73_P082731|786476	0.000631481	9.61304e-06	up	1.97499	1.97499	0.981843	SERTAD2	PREDICTED: Bos taurus SERTA domain containing 2 (SERTAD2), transcript variant X2, mRNA [XM_010810111]///SERTA domain containing 2 [Source:HGNC Symbol;Acc:HGNC:30784] [ENSBTAT00000033010]	GGTTTGGGCTGTAATCTGAACAATTGGACAGATTAAATGTACATGGAAATGAGCAGTCTT///ACTTGACCCTGGACGACATCCTGTTCGCCGACATTGACACGTCCATGTACGACTTCGACC
A_73_P154492,A_73_P037371|507646	0.000844201	3.23245e-05	up	1.97482	1.97482	0.981724	TM4SF4	Hw_Liver_12_H09 Bos taurus CF-24-HW liver cDNA library Bos taurus cDNA, mRNA sequence [DV785258]///Bos taurus transmembrane 4 L six family member 4 (TM4SF4), mRNA [NM_001034306]	GGGCAGAGTTATTTCTTCTCCTTTCCACCAGCTCAGTTCAACTTAGAATTTTATGTTAGT///GCACTGCTTCTTTGTACATAGAGATGTTAATATCTTTGGAAGTTTTACAGAACTCAAAGG
A_73_P047081|783855	0.0062924	0.0013898	up	1.97462	1.97462	0.981577	TIFA	Bos taurus TRAF interacting protein with forkhead associated domain (TIFA), mRNA [NM_001081621]	GTGTGTGCCATTGAGGTTTTAGTATGGGAAGACTTACTTATTATTTGAGCAATAATACCT
A_73_P494513	0.000666125	1.43994e-05	up	1.97288	1.97288	0.980304			ATTCAACAAGGTCTAAAATCCATCATGGATCAGTGCCCTTAAGTAAAAGTTTGAAAGACA
A_73_P040456,A_73_P477028|509120	0.00171225	0.000158251	up	1.97178	1.97178	0.979502	RCC2	Bos taurus regulator of chromosome condensation 2 (RCC2), mRNA [NM_001101911]///regulator of chromosome condensation 2 [Source:HGNC Symbol;Acc:HGNC:30297] [ENSBTAT00000064882]	GTTTTATAAGTGATTCAACGCCAACTACCTTTTCTGTATGCTTTCCAAAGTGGGTTTTTT///TCCTGGGATGACGGTGACAGTGGGCGTGTTTCTCTTTCCCAGGTGGTCTGTTTTTCTGGG
A_73_116206	0.00181703	0.000180832	up	1.97014	1.97014	0.978298		Rep: Predicted protein - Nematostella vectensis (Starlet sea anemone), partial (6%) [TC404351]	GGGACTTACAGCTATTACTATATTCTTAGACTAACCTGTCCATCTTTGCAGCTTTCTGGG
A_73_P068791,A_73_P085876,A_73_P085882,A_73_P102871,A_73_P085871|445419	0.00186151	0.000189296	up	1.96967	1.96967	0.977954	FZD3	Bos taurus frizzled class receptor 3 (FZD3), mRNA [NM_001192964]	ATTGGATGCTACTTTTATGAGCAAGCTTACCGCGGCATCTGGGAAACAACGTGGATACAA///TAATCCTATGACTCACATCACACATGGCACCAGCATGAATCGGGTTATTGAAGAAGATGG///GATCTCATAACAAAGCCTGTACCATGCTTTTTATGGTACTCTACTTTTTTACTATGGCTG///TACCATGCTTTTTATGGTACTCTACTTTTTTACTATGGCTGGCAGCGTTTGGTGGGTAAT///ATGACTCACATCACACATGGCACCAGCATGAATCGGGTTATTGAAGAAGATGGAACCAGT
A_73_120610	0.00265188	0.000361409	up	1.96735	1.96735	0.976255		LB0289.CR_G20 GC_BGC-28 Bos taurus cDNA clone IMAGE:8223022, mRNA sequence [DV915946]	GCATCTGTGTTCTGGGCCTCATCTTGACTCTGCCCAGATCGCTCTAATTTTATACACAAA
A_73_112862	0.0173566	0.00562391	up	1.96723	1.96723	0.976168		716426 MARC 6BOV Bos taurus cDNA 5', mRNA sequence [CB458268]	CCGGCAACTTTGAGCTAGCCGAGTACATCAAGAACCACAAGGAGACCGACGTTGTGCCCT
A_73_118151	0.00655878	0.00148394	up	1.96548	1.96548	0.974885		Rep: Yarrowia lipolytica chromosome D of strain CLIB122 of Yarrowia lipolytica - Yarrowia lipolytica (Candida lipolytica), partial (3%) [TC425768]	GCATTCCGTCGTGTGCCTTATTCTTGGAGAATCTGTATACGGCCTGCCTATAGAGATATA
A_73_102170,A_73_P353001,A_73_P033286|540111	0.00112253	6.67725e-05	up	1.96508	1.96508	0.974589	NUP160	Bos taurus nucleoporin 160 (NUP160), mRNA [NM_001105630]	TGTGGACCTTATGACTCACAATTACTATGAGCTTCTGTATGCCTTTCACATCTATCGTCA///AGATCATAAACTACGAATGTGGTCTTACAAGGACCAAATGTGCCTGATGGTGGCTGACAT///CAGATTTAGAGGCATTCATGGCCACAAATTTGGGGAAACATGAAAAAATAAACTCTTGAA
A_73_P033316,A_73_P395676|539332	0.000825141	3.01101e-05	up	1.96499	1.96499	0.974519	CFL2	Bos taurus cofilin 2 (CFL2), mRNA [NM_001076154]	GAGATCAAACTCCCCACCCTCACAAAAATGGCCACGTTGCAATAAAAATTGTGGCATATT///CACTTGAAGGAAAACCCTTATAAAGCAAGTCAAGTGCCATCTGGATCTTAAAGAGCTTCC
A_73_P043091|780933	0.00336809	0.000531184	up	1.96462	1.96462	0.974249	LOC780933	Bos taurus cationic trypsin (LOC780933), mRNA [NM_001113727]	TACGTGAGCTGGATTAAGCAGACCATCGCCTCCAACTAAATAGCTTCATCTCTTCATGAC
A_73_P075536	0.0460947	0.0195318	up	1.96406	1.96406	0.97384			ATATTTGTGTCATCCTGGTCTTCTACGTGCCTGGAATATTCTCCTTCCTCACTCACTGCT
A_73_P275036,A_73_P035536|510219	0.0035309	0.000572716	up	1.96245	1.96245	0.972653	TOMM40	Bos taurus translocase of outer mitochondrial membrane 40 (TOMM40), mRNA [NM_001075438]	AGTCTTGGAGTCCAGGAAGCGATTCTGGAGTCAAGGGGCCTATGGGATTCTGAGCACCAG///TATGTCGCTAGCTGGGAAATACACATTGAACAACTGGTTGGCGACAGTAACATTGGGTCA
A_73_102197	0.00197477	0.000211561	up	1.9622	1.9622	0.97247		Rep: Ribosomal protein S8 - Halimeda cuneata, partial (13%) [TC417845]	CGATTAGCATTGAAGTTACTTTTAAAGGTCACTAAGAGAGTCATCCTTTTATTCAACTGC
A_73_P035406,A_73_P503963,A_73_P244825|617530	0.000672094	1.55003e-05	up	1.96017	1.96017	0.970982	CEBPG	Bos taurus CCAAT/enhancer binding protein gamma (CEBPG), mRNA [NM_001034801]	GCCCTGAAGAGCTGATTAGCTAAAAATGTTAGACGTGTAACTTGAATATCTGGTTTTAAA///TACTGAAAGATTTGTTTCTTGAGCACGCACACAACCTCGCAGATAACGTGCAACCCAGTA///ATAACGTGCAACCCAGTAGCACTGAAAATACGACAAATCCTGACAAGGCAGGACAGTAGA
A_73_116707|616283	0.00792587	0.00193803	up	1.95995	1.95995	0.970818	LIN7B	Bos taurus lin-7 homolog B, crumbs cell polarity complex component (LIN7B), mRNA [NM_001046577]	TCCAGCGAGTCCTGCAGAGCCGCTTCTGCTCTGCCATCCGAGAGGTGTATGAGCAGCTCT
A_73_102141|512578	0.0208628	0.00713565	up	1.95912	1.95912	0.970209	KCTD15	Bos taurus potassium channel tetramerization domain containing 15 (KCTD15), mRNA [NM_001075568]	AGATGCTGATGTACAATTGTCGTGTGTTTGTGTAAACACATTATGTTCCTAGTTCATGCC
A_73_P304471,A_73_P037096|615037	0.00663519	0.001504	up	1.95869	1.95869	0.969892	BMP2	Bos taurus bone morphogenetic protein 2 (BMP2), mRNA [NM_001099141]	CATATGCCCGAAGCTTTGGAAAACAATAGCAGTTTCCATCACCGAATTAATATTTATGAA///AAGATGAAAAGTCTACATGGAAGGTTACTCTGGCAAAGTGCTTAGCACATTTGCTTTTTT
A_73_P310321,A_73_P064816|528033	0.00326086	0.000505997	up	1.95777	1.95777	0.96921	CRLF3	Bos taurus cytokine receptor like factor 3 (CRLF3), mRNA [NM_001192650]	TTCAGAGTTGAAACTGTGGGACAACCAGACAGAAGAGACAGTATAGGAGTGTGTGCAGAA///GGTTCTCTTTACTTTGGATGCTCATTTTTCTATCCTGGGTGGAAAGTGCTGGTGTTCTAG
A_73_114332|535881	0.0174402	0.00566296	up	1.95776	1.95776	0.969207	SLC8A2	solute carrier family 8 member A2 [Source:HGNC Symbol;Acc:HGNC:11069] [ENSBTAT00000014410]	GCTCTTTCTGGGCCTATGGTTCCTTTACATCCTCTTCGCCAGCCTAGAGGCTTACTGCCA
A_73_108761|540044	0.0204947	0.0069652	up	1.95748	1.95748	0.968999	GPR84	Bos taurus G protein-coupled receptor 84 (GPR84), mRNA [NM_001038568]	TGGGGCGCTATCTCCTCATTGCCCACCCTAAGCTCTTTCCCCAAGTTTTCAGTGCCAAGG
A_73_P205997	0.0113654	0.0032115	up	1.9572	1.9572	0.968793		LB00466.CR_H14 GC_BGC-04 Bos taurus cDNA clone IMAGE:8052640, mRNA sequence [DT842913]	TTTGGTTTAAGAATAGAAGAGCCAAGAGTCGGAGAAATGAGAGAGCAGCCGTGGTTCAAG
A_73_P047866|532884	0.0105438	0.00289315	up	1.95698	1.95698	0.968628	MNS1	Bos taurus meiosis specific nuclear structural 1 (MNS1), mRNA [NM_001046338]	GAGTAGGACTCCTCCAGTGTCTCTGGATTTTCTAAAACATTTCTGTATCATTTATAAACA
A_73_P087551	0.00324515	0.000500679	up	1.95667	1.95667	0.968401		histone cluster 4 H4 [Source:HGNC Symbol;Acc:HGNC:20510] [ENSBTAT00000063932]	TTTCTGGAGAATGTTATTCGGGACGCGGTCACCTACACAGAGCACGCCAAGCGCAAGACG
A_73_104192|513008	0.0329844	0.0128483	up	1.95601	1.95601	0.967911	SLC45A1	Bos taurus solute carrier family 45 member 1 (SLC45A1), mRNA [NM_001192339]	TGGTGGATGGAGGCGGGACAGGTCTCCTGTTGGGATGTAAATATGTGATAAGACAATAAA
A_73_P110131,A_73_120833|529166	0.0308524	0.0118109	up	1.95584	1.95584	0.967786	CBLN3	Bos taurus cerebellin 3 precursor (CBLN3), mRNA [NM_001079603]	ATTTTTATTCCACTTGCTTGCATGGGACCTTGTGCCAGACATCCAAGGTGAAGAGTAGAG///TCTACAGCTTCCGGTTCCATGTGGTGAAGGTGTACAACCGCCAGACTGTCCAGGTGACCT
A_73_P411221,A_73_117062|519613	0.0026457	0.000359761	up	1.95569	1.95569	0.967678	REEP4	Bos taurus receptor accessory protein 4 (REEP4), mRNA [NM_001034533]	AAGGTTCGGACAAGAAAAAAGACCGCACCCTCAGACATGGACAGCTAGGGTCTGCGGAGC///GTTGCTGATTGTACGGTTTGTGTTGGTGAATGAGGCTAGGTTTGTGGAAGTTTTGATAAA
A_73_120138	0.00397505	0.000694075	up	1.95567	1.95567	0.967664			TTGGTATCCTTCCTCCAGAGTGTAAGCACAATGAAGACAGGGATTTTGTATTTTTTAATC
A_73_P092536,A_73_P094811|504599	0.000415278	4.74134e-08	up	1.95485	1.95485	0.967057	LOC504599	Bos taurus histone H3.2 (LOC504599), mRNA [NM_001166569]	AACCTGTGCGCCATCCACGCCAAGCGCGTGACCATCATGCCCAAAGACATCCAGCTGGCT///TGAAGACACGAACCTGTGCGCCATCCACGCCAAGCGCGTGACCATTATGCCCAAAGACAT
A_73_P383126,A_73_P104951|790482	0.0087747	0.00222258	up	1.95225	1.95225	0.965141	SYCE3	Bos taurus synaptonemal complex central element protein 3 (SYCE3), mRNA [NM_001206333]	AAAGACTTGGAAAAGCTGTTGGAAGAGATGGAAAAAATCTCAGTGCAGGCCACGTGGATG///CCCAACTCACGGCCTGGGCACAGAGCTTGTTTCTCAATAAACTTATTTTCAAGCAAAAAA
A_73_P473873	0.0128814	0.00380128	up	1.95085	1.95085	0.964102		PREDICTED: Bos taurus ring finger and FYVE-like domain containing 1, transcript variant 4 (RFFL), mRNA [XM_867129]	TGGTGAAGGTTTCCATTTAGAAGAAAAAGTGTTAAAACAACCTAACCCTAAGCACCACCC
A_73_109083,A_73_P095251,A_73_P384201,A_73_P494748|537511	0.00503459	0.000986805	up	1.95016	1.95016	0.963589	PHC2	Bos taurus polyhomeotic homolog 2 (Drosophila) (PHC2), mRNA [NM_001192908]	CAGGAGATTTTCCTTTCCAGATTGTTGTGGTGTCTCTGCAGCCCTTTCCTGCACTGTGAC///TCAAGCTGGGGCCAGCCCTTAAGATCTACGCACGTATCAGCATGCTCAAGGACTCCTAGG///AATAAACCACCACAGGCCATTGTGAAACCCCAAATCCTGACGCATGTTATCGAAGGGTTT///AGTTTAAGCGTTCCAAGCACTTTTGTTCCATGGCTTGTGCAAAAAGGTACAACGTGGGGT
A_73_P067671|538483	0.0194551	0.0065023	up	1.94999	1.94999	0.963468	CIC	PREDICTED: Bos taurus capicua transcriptional repressor (CIC), transcript variant X4, mRNA [XM_005219390]	TCTCGTTTTGAGTTTGACGAGTGCGAAGCAGCGGTGATGCTGGTGTCCCTGGGCAGTTCT
A_73_116103	0.00603533	0.00130992	up	1.94987	1.94987	0.963378		Rep: Xanthine:oxygen oxidoreductase - Tragelaphus oryx (Eland) (Taurotragus oryx), partial (4%) [TC446487]	TGCTCTAGCAAGTGTTACAAGGCATGCTTGCCCTTGCTGATTTTGACCTCCTTAATGAGA
A_73_P492728	0.0274168	0.0101587	up	1.94966	1.94966	0.963223		GB	TTCAACGAGTGGCTGGGTTCATTTTTGTCTGGTTGCGTGTCCAGCCCCCAGTACCTGGTC
A_73_P368251	0.00258471	0.000344091	up	1.94817	1.94817	0.962123		PREDICTED: Bos taurus KIAA1217 ortholog (KIAA1217), mRNA [XM_590767]	TTAAATGAAGCATGTGTTACCAAAAAAGAGAGTATGGCGAGAGAGAAGGGTGTGTGTGAG
A_73_121317	0.00220652	0.000263429	up	1.94763	1.94763	0.961719		PREDICTED: Bos taurus neuropilin 2 (NRP2), transcript variant X1, mRNA [XM_005202752]	CTGTTAAAGGTATTTGACCATCCACTGGCTGAGCCAGATCAAGGGAACTTGAGAGCTTTT
A_73_P418131,A_73_115279|536654	0.0262768	0.00963129	up	1.94731	1.94731	0.961483	GNAQ	Bos taurus guanine nucleotide binding protein (G protein), q polypeptide (GNAQ), mRNA [NM_001110002]	GAGAAAATTATGTATTCCCACCTAGTTGACTATTTCCCGGAATACGATGGACCCCAGCGA///CATCCCTTCCTCTTGATTTTTCCCACATTACGATGGCCTTTATCATAGTTCCATTCTTGG
A_73_104170	0.0158061	0.00496271	up	1.94601	1.94601	0.960522		BS320011000H11 Subtracted Lewin Cattle Spleen Bos taurus cDNA clone BS320011000H11 5', mRNA sequence [BM365292]	CAAGTGAACCTACCTAGATCTCAGTGTGTGTCGCTACAACCTTTTACCCAAAGGCTCTTT
A_73_P137566	0.0275302	0.0102091	up	1.94581	1.94581	0.960372		1184112 MARC 7BOV Bos taurus cDNA 5', mRNA sequence [DN283875]	TTGGTGGTGGTGTGAGTTCTGTTGACTTTACAGTATGGTTTCTTGGTGTTTTCTCTTGGT
A_73_P069751|326597	0.000738098	2.21993e-05	up	1.94581	1.94581	0.960369	CALM	Bos taurus calmodulin-like (CALM), mRNA [NM_001166508]	GATGGTCAAGTAAACTATGAAGAGTTTGTACATATGATGACAGCAAAGTGAAGACATTGT
A_73_P058946	0.0150545	0.00466141	up	1.94569	1.94569	0.960286		forkhead box K1 [Source:HGNC Symbol;Acc:HGNC:23480] [ENSBTAT00000025710]	AGTTAACTTCTGTTCCCGAGTACCGCTATTCCCAAAGCGCACCTGGCTCTCCGGTCAGTG
A_73_115939|281456	0.000960927	4.7176e-05	up	1.94559	1.94559	0.960211	RHCG	Bos taurus Rh family C glycoprotein (RHCG), mRNA [NM_174172]	TGTAAGCCAGTGTCTTCCATACCCCCTGAATCCCCTAGACCTCTCTGTGCCATGCAGATG
A_73_110077	0.0015714	0.000133779	up	1.94542	1.94542	0.960083		Rep: Serine/threonine-protein phosphatase PP1-gamma catalytic subunit (EC 3.1.3.16) (PP-1G) (Protein phosphatase 1C catalytic subunit). - Bos Taurus, complete [TC409121]	TGGTGAGTTGTGTGACATCATCTGTATCCATATTTTTTGTCTGGGTTTATTTGAACTTGG
A_73_115912	0.0145853	0.00446228	up	1.94457	1.94457	0.95945		Rep: WD repeat-containing protein 63 - Homo sapiens (Human), partial (19%) [TC461158]	TAGAGGTGTTTTGGGGGTCTGTGGGAATTTTCTTTTTGCTCATTATTTTTTATGTAAGGT
A_73_P247536	0.000655957	1.3754e-05	up	1.9445	1.9445	0.959398			ACATAACCTACTCTAAGAACGAAGTTGTCACCGCAGATAGGTCCTCATTAGCAAGGAGTC
A_73_P202072,A_73_P492573,A_73_P440681,A_73_P035391|511908	0.000783216	2.67331e-05	up	1.94447	1.94447	0.959377	EHD1	Bos taurus EH-domain containing 1 (EHD1), mRNA [NM_001015578]	AAGAACCACGAGGACAAGATCCGTGTGGTGCTGAACAAGGCCGACCAGATTGAGACGCAG///AGCATAAGCATCATTGACACGCCGGGGATCCTGTCTGGAGAGAAGCAGCGCATCAGCAGA///ATGGTAAAGTCCAAGCTCCCCAACACTGTGCTGGGGAAAATCTGGAAGCTGGCCGACGTG///GGGGTGATACTCACATGTGAATGACGGAATTTTGTGCATAAGAACTATGGATATTTTTAA
A_73_P414166,A_73_103147,A_73_P072956|504480	0.00174502	0.000163939	up	1.94408	1.94408	0.95909	SGK3	Bos taurus serum/glucocorticoid regulated kinase family, member 3 (SGK3), mRNA [NM_001193021]	ATCTGAGGATGAGGATGAAAGAAGTACTCAGAAGCTACTCTCTACCTCACAGAACATCAA///ATCTTCCTAATTGGTTGATAAGTAACAAGACTATTGCACTGTCTGTTTACCTAATTGGGA///GCAGATGATGCCTTTGTTGGTTTCTCTTACGCGCCTCCTTCAGAAGACTTATTTTTGTGA
A_73_P062691	0.000699123	1.85894e-05	up	1.94381	1.94381	0.958884		Histone H2B type 1 [Source:UniProtKB/Swiss-Prot;Acc:P62808] [ENSBTAT00000045227]	ATGGGAATCATGAACTCCTTCGTCAACGATATCTTCGAGCGCATCGCTGGCGAGGCGTCG
A_73_P503513	0.00126541	8.69277e-05	up	1.94372	1.94372	0.958822		PREDICTED: Bos taurus ankyrin repeat domain 11 (ANKRD11), mRNA [XM_612059]	TGGTTCCACTTTTGATCGACTCAAGAGAATAAAACTAAGGCGTCTACCCCTCAGCAACAG
A_73_P303471,A_73_P119391|506408	0.00351887	0.000569257	up	1.94347	1.94347	0.958633	LOC506408	zinc finger protein 786 [Source:HGNC Symbol;Acc:HGNC:21806] [ENSBTAT00000019646]///PREDICTED: Bos taurus zinc finger protein 786 (ZNF786), mRNA [XM_582851]	AAGAAGCTCATTACTATTTCCAAGTAGATCCTCTTCAGAGCCACCGTTCCTGTAAACCCT///AAGCATGGGGTGACTGTTAAATGTCAGCTCTTCTCTTCATAGTATGAACATAAGCAGGGG
A_73_P309631,A_73_P080256,A_73_117509|540681	0.00344503	0.000550921	up	1.94254	1.94254	0.957945	WDHD1	Bos taurus WD repeat and HMG-box DNA binding protein 1 (WDHD1), mRNA [NM_001192766]	AGAAGGAATGGTTCGATTTAAAGTACTGTCATCTGAAGAAAGGAAGGCATGGGCTGCCAG///AAACCTTTAGATCTTTCTACGAATCAGAAACTGTCAGCTTTTGCTTTTAAGCAGGAATAG///ACTGACTGGAGGCCACTGTCATGTCCCATTGCAAGCTGGATTGATTTTGTTTCTTACCTT
A_73_106899|613918	0.0107856	0.00298743	up	1.94205	1.94205	0.957578	FAM155B	family with sequence similarity 155 member B [Source:HGNC Symbol;Acc:HGNC:30701] [ENSBTAT00000045942]	TCTACATCCTTGTCCTCGTGCTCCTGCATACCATGGTGTCCTTCTCCAGCAGCCAGAGTG
A_73_P204152,A_73_P080536,A_73_P462076|505848	0.00375874	0.000636709	up	1.94189	1.94189	0.957464	ELMSAN1	ELM2 and Myb/SANT domain containing 1 [Source:HGNC Symbol;Acc:HGNC:19853] [ENSBTAT00000012216]	ACTTTTAATAAGACCCAGAATCAGGAGAACACTTTCCCTTGTAAAAAATGCGGCAGGTAA///GCAAAACGAATACAATTCAATAAACGGCCCTTTTTATTTATAAAGGTCCCAGGAGCAGTG///TGGCATGGGGGTCGCTACCTACTACAACCACCCGGAGCCTCTGAAGCTAGAGAAGGTGGG
A_73_P116816,A_73_119688,A_73_P383931|615342	0.000709557	1.99719e-05	up	1.94181	1.94181	0.957402	BNIP3	Hw_Fat_52_B05 Bos taurus CF-24-HW fat cDNA library Bos taurus cDNA, mRNA sequence [DV781287]///Bos taurus BCL2 interacting protein 3 (BNIP3), mRNA [NM_001076366]	CCCCTTTCATACACTGTAAAAATTGCTGGTTGTAATTGCTTTCCTTTTTCCCACCCAAAA///CATCTTCTCTGCGGAGTTCCTCAAGGTCTTCCTGCCGTCGCTGCTGCTGTCCCACCTGCT///CAACGAGCATGTTGTTGATTAATACCTACTGTAATAATTCGGTAGTAACCTTCTTCAGAT
A_73_105277	0.000655957	1.39549e-05	up	1.94139	1.94139	0.957088			TTTAACTATACATTGTCCCCAAAGTGCCTGTGCATTGTGCAGAAAAGAAACCTGGGTAAC
A_73_P190947|785690	0.0006265	8.20552e-06	up	1.94009	1.94009	0.956123	GEN1	Bos taurus GEN1, Holliday junction 5' flap endonuclease (GEN1), mRNA [NM_001205450]	TCTGGGAGTTACATTTACTTTCAATGTGAAGATACTTTCAACTGCTCTTCCAGTTTCAGT
A_73_106171|529171	0.00930927	0.00241801	up	1.9385	1.9385	0.95494	SLC16A6	Bos taurus solute carrier family 16, member 6 (monocarboxylic acid transporter 7) (SLC16A6), mRNA [NM_001192672]	GACTTTCTGGAGATGGACCTGGGGAAGACCGAGCACAGAGCTCCTGCAAGAACGGAGCCC
A_73_P367701,A_73_P264976,A_73_112201|535702	0.0012782	8.86258e-05	up	1.93841	1.93841	0.954875	KLF5	Bos taurus Kruppel like factor 5 (KLF5), mRNA [NM_001083727]	AAGGGTTACCTTACAGTATCAACATGAACGTCTTCCTCCCTGACATCACTCACCTGAGAA///TTAATACCAAAGTGTTTGGTCCTTGTCCGAATCTGGAATGCTTGCTATATGCTGGCTTGA///TAATGGAGCAAACAGCTGTATAGTTGTAGAATTTTTTGAGAGAATGAAATGTTTATATAT
A_73_P046316,A_73_P369656|514456	0.00785272	0.00191178	up	1.93786	1.93786	0.954466	GPD1L	Bos taurus glycerol-3-phosphate dehydrogenase 1-like (GPD1L), mRNA [NM_001100363]	TGAGTGTGTGTTCCTTTCTCATTCTATGGATGTTTCTATGAACCAAAATTAAAGGCCCTT///TTCTGCAGACTCCAAATTTTCGAATTACGGTGGTGGATGATGCAGACACGGTTGAACTGT
A_73_P492223	0.00151567	0.000124536	up	1.93633	1.93633	0.953322		GB	AACCTCATCCCAACCATGACCAGGAAGATGAAGGAATCTCTCTCATCCATTGGGAAATAG
A_73_P169352,A_73_P049981,A_73_P114341|786612	0.0010194	5.5323e-05	up	1.93487	1.93487	0.952235	PJA1	Bos taurus praja ring finger ubiquitin ligase 1 (PJA1), mRNA [NM_001080366]	ATACAATGAAAACGAGAGCAGCAGTGAGGGGGATAATGATTCTGGTCAGGAGTTTCTGCA///ATGGGTTAATGTTCCTGTAATTGCAGTGCCGTAAAAGCTTATTAAAGTTCTCCTTTTGGT///TCACAGTTCTCTAGTTTTAACCATGATGTGAGAGAGGAGCTTGACAAGTTAGACCCAGCC
A_73_P077386|617043	0.000852758	3.36876e-05	up	1.93449	1.93449	0.951953	LOC617043	GB	ACAAACGCTCGACTATCACATCCAGGGAGATCCAGACCACCTTGCGCTTGCTGCTTCCTG
A_73_P041761,A_73_P463886|512633	0.00526619	0.00105841	up	1.93389	1.93389	0.951503	MFSD2A	Bos taurus major facilitator superfamily domain containing 2A (MFSD2A), mRNA [NM_001101959]	GCCTAGCCTGGAACACTAATGTAGAAACGTTGTATACAGAGACTAATTAATAACTTAATG///GAAAAAACAGTTGTCCATTTGCAACAAACTATGCTATGCAGTTGGGGGAGCCCCGTATCA
A_73_104714|510276	0.00137019	0.000103367	up	1.93374	1.93374	0.951396	RASSF1	Bos taurus Ras association domain family member 1 (RASSF1), mRNA [NM_001075442]	TGGGGGTGATAGTCATCAGGGCCTGGGGTCTGAGAGAAATGGCTAAATAAAGATTTAAGA
A_73_103807	0.0021286	0.00024384	up	1.93348	1.93348	0.951202		Rep: inositol polyphosphate-5-phosphatase F - Bos Taurus, partial (44%) [TC426442]	CAAGTATTGGTTTGTCTGGTATCTTTAGAGCCTTACTCTGTTGAAGTGATTGTCAGCTAA
A_73_106933|617971	0.0182029	0.00596686	up	1.93313	1.93313	0.950939	LOC617971	lysine demethylase 4D [Source:HGNC Symbol;Acc:HGNC:25498] [ENSBTAT00000002234]	AAAGGCACTCAAGAGCTGACTGCCCCCATCGGAGCTAAGAGGGGCCTTGCCTTAGACCGC
A_73_116785	0.00110162	6.49351e-05	up	1.93233	1.93233	0.950339		PREDICTED: Bos taurus uncharacterized LOC515736 (LOC515736), transcript variant X1, mRNA [XM_005222461]	CAGCCAAATGAACTGAAGCAATCTGGAATCTCCAGGCCTATCTGCATTTCAGAGATCATT
A_73_P108216,A_73_P106601,A_73_115087|317776	0.00830337	0.0020646	up	1.93229	1.93229	0.950308	MYB	MYB proto-oncogene, transcription factor [Source:HGNC Symbol;Acc:HGNC:7545] [ENSBTAT00000045964]///Bos taurus MYB proto-oncogene, transcription factor (MYB), mRNA [NM_175050]	TAATGTCAACTGAGAACGAACTCAAAGGACAGCAGGCACTTCCAACACAGAACCACACAT///GGAGAAGAGCCTATTTTTGTTGTGGTACAACAGTTGAGAGCAGCACCAAGTGCATTTAGG///GCTCATTTATGGTCAATAACATTGGAGGTACGTTTATTGTACCAAACCATTTTATGAGAG
A_73_P440026,A_73_P044436|538366	0.0046046	0.000865509	up	1.93135	1.93135	0.94961	SNX18	Bos taurus sorting nexin 18 (SNX18), mRNA [NM_001083731]	GGTTGATCTAATGAGGGACCAGAAATAATTTCTACTATTCCAAATGCTGATGGAAAAAAG///CAAGAGAAAAGCCATCATAATGTGTATGCTGGTCATTTTGATCAGTGTGGTACAATTTTT
A_73_109357|518321	0.00246424	0.000317174	up	1.93115	1.93115	0.949459	C1QBP	Bos taurus complement C1q binding protein (C1QBP), mRNA [NM_001034527]	GCAGCAAGGTGCTGAACACCTTAATTTTATGGCAGGCTTTGGCCAGTGAACAAAACCTAA
A_73_P115741,A_73_P260226,A_73_P033036|613907	0.00390729	0.000676061	up	1.92951	1.92951	0.948235	BHLHE41	Bos taurus basic helix-loop-helix family member e41 (BHLHE41), mRNA [NM_001076297]	GAATCCGTGCTCCACTTGAGAGGGGACCAGGGTTCACGCGGAATAATAATATTAATAAGT///AGATAATTGCTTTACAGAATGGGGAACGATCTCTGAAATCGCCCATTCAGTCCGACTTGG///AAACACCCTTAACGTTTTTAAGGGAGGAAGTGTAAGAGATGCACGACAGGCTTTAAAAAA
A_73_P460221	0.00189622	0.000196507	up	1.92945	1.92945	0.94819		Rep: Chromobox protein homolog 5 - Homo sapiens (Human), complete [TC402841]	ACCAGGCATTTACATACTGTGTGTAATTCCCACCATTTTTTCCTTTGCCCTGTTCTCTCT
A_73_107544|510995	0.0146269	0.00447835	up	1.92902	1.92902	0.947872	KIFC1	Bos taurus kinesin family member C1 (KIFC1), mRNA [NM_001101936]	CTACAGCTTTGTGGCAAGTTACGTAGAGATCTACAACGAGACTGTCCGAGACCTGCTGGC
A_73_P078746	0.0128465	0.00378715	up	1.92819	1.92819	0.94725		Rep: Ribose-phosphate pyrophosphokinase 2 - Rattus norvegicus (Rat), partial (52%) [TC480619]	CCCGACCATGCCCAACATCGTGCTCTTCAGCGGCAGCTCACACCAGGACCTGTCCCAGCG
A_73_P192928,A_73_117320|782669	0.00146937	0.000118154	up	1.92816	1.92816	0.947227	HNRNPA3	Bos taurus heterogeneous nuclear ribonucleoprotein A3 (HNRNPA3), mRNA [NM_001205429]///heterogeneous nuclear ribonucleoprotein A3 [Source:RefSeq peptide;Acc:NP_001192358] [ENSBTAT00000028757]	AAGTGGTGGATATGGTAGCAGAAGGTTCTAAAAACTCAGAAGAAAAGGGTAGGTATCTTT///CCAAATGCGTTAGAGGAACTGTAAAAATCTGCCACAGGAGGAACGATGATCCATAGTCAG
A_73_P092046,A_73_P092041,A_73_115948|515770	0.00253109	0.000333041	up	1.92816	1.92816	0.947226	PPOX	Bos taurus protoporphyrinogen oxidase (PPOX), mRNA [NM_001192426]	TTGGTCCATCTACACAAGAACTCTATCCCCCAGTATACATTAGGCCACTGGCAAAAACTG///ATCTACACAAGAACTCTATCCCCCAGTATACATTAGGCCACTGGCAAAAACTGGAGTCAG///CACTTCTTCTTGCCCCTGGTGGCAGGGATTCTCTCACCCATGAAAATAAAAGTTGCTAAA
A_73_P185687,A_73_P386141,A_73_100227,A_73_P352541|510019	0.00174364	0.000163519	up	1.92812	1.92812	0.947193	FAM49B	Bos taurus family with sequence similarity 49 member B (FAM49B), mRNA [NM_001046047]	GGAGTTTGAGTAATTTGTTCAAGGGTACCAAGTTGATAAGAGGGACAGGAACAGAATCAC///TTATAACCAGGTGAATGTGGTTCTAAAAGATGCAGAAGGCATCCTGGAGGACTTGCAGTC///AAACTGTGATGTGTGCGTAGAATATTACGTATGCATGTTCATGTTTAAAGAATGGCTGTT///GACAGTATTCTGCAGTGACTGAAAATGCACAGTTTTTAGTGATTGCAATTACAATCTCAT
A_73_105533|782104	0.00288091	0.000414769	up	1.92773	1.92773	0.946904	MYO15A	myosin XVA [Source:HGNC Symbol;Acc:HGNC:7594] [ENSBTAT00000035016]	TAGCTGCCCCTATGTGGAGGTTGCACTTGGGGATGTCACTGCCCAGCACACCGTGCAGCT
A_73_P259896,A_73_P048781|504831	0.00266297	0.000364441	up	1.92769	1.92769	0.946873	CNBP	Bos taurus CCHC-type zinc finger nucleic acid binding protein (CNBP), mRNA [NM_001034224]	TTGTATTATTTTCTCTGAATCCTCTTCACTGGCCAAAGGTTGGCAGACAGAGGCTACTCC///CTGTGTTTCATTTGCTGTAATCAGTTTTTAAAAGTCAGATGGAAAAAGCAACTGAAGTCC
A_73_107131,A_73_P034956,A_73_P386186,A_73_P408991,A_73_P367086|282658	0.00319949	0.000489128	up	1.9271	1.9271	0.946429	ARPP19	Bos taurus cAMP regulated phosphoprotein 19 (ARPP19), transcript variant 2, mRNA [NM_174705]///Bos taurus cAMP regulated phosphoprotein 19 (ARPP19), transcript variant 1, mRNA [NM_001113255]	TAATAATAAGCTAAGTGAATTAGACTTGTGACAGAGCAATTTACGTGATAGGTGGAACAG///CGACTGTTGAATTCACTTTTGTGCCATTTTTGTAAATACAGTAGTTTTGCACAACCTCTC///AAGTGTGCATGTGCATCAACTGTTGAATTCACTTTTGTGCCATTTTTGTAAATACAGTAG///CAAAAATGAAGAACAAGCAACTTCCTACTGCAACCCCGGATAAGACAGAAGTCACTGGTG///CTTTTGGGTTTTGTAAACAGAAGTTTAAGACCACAAGTTAGAAGAGAGGTCACATATTTC
A_73_109028	0.0355422	0.0140987	up	1.92585	1.92585	0.945496		Rep: Cytochrome b-245 heavy chain (p22 phagocyte B-cytochrome) (Neutrophil cytochrome b 91 kDa polypeptide) (CGD91-phox) (gp91-phox) (gp91-1) (Heme-binding membrane glycoprotein gp91phox) (Cytochrome b(558) subunit beta) - Bos taurus (Bovine), complete [TC439209]	CATTGTGTTTATTAATTTGAATACTTGTAGATGTTGTGTGTGAATAGTTTGGGAGAGGGG
A_73_102174	0.0429214	0.017916	up	1.92543	1.92543	0.945178		PREDICTED: Bos taurus zinc finger and SCAN domain-containing protein 5B-like (LOC532036), miscRNA [XR_083964]	TATAGGATCAAGCCCTACGTGTGCCCCGAGTCCCAATTGCCTTCTGTCAGCTGGGGACTT
A_73_120593,A_73_P308906|531593	0.0407338	0.016793	up	1.92517	1.92517	0.944983	CALY	Bos taurus calcyon neuron specific vesicular protein (CALY), mRNA [NM_001075953]	CCTCCTGCCCGGCGTGAGCCGTTAGTTCTGTCGCTTTTCTCTGAGTAAAGATTCCACCCT///TGATCATGTACAAGGCCATCTGGTACGACCAGTTCAGCTGCCCAGACGGCTTCCTGCTTC
A_73_105829,A_73_P046071|540979	0.00141154	0.000109295	up	1.92514	1.92514	0.944965	STK35	Bos taurus serine/threonine kinase 35 (STK35), mRNA [NM_001113768]	AGAGAAGTTTTGAGTGGACACTGCATTTGAACTGAGTCTCTTAAGATTTTTAGAAACACT///TCTTGAAAGATATGTTAGCTGCTAACCCACAGGACCGGCCTGATGCCTTTGAACTTGAAA
A_73_120433	0.000812288	2.92753e-05	up	1.92503	1.92503	0.944882		Rep: RNA-binding protein MEX3C - Homo sapiens (Human), partial (74%) [TC399160]	TGCAACTAATAAGCCAAGGAATCGACATATATTAGGTGCGTGTACTGTTTCTAAAAACCA
A_73_110692	0.000655957	1.30738e-05	up	1.92417	1.92417	0.944239		ADP ribosylation factor like GTPase 6 interacting protein 4 [Source:HGNC Symbol;Acc:HGNC:18076] [ENSBTAT00000002087]	AGCTTCCTCTGCAATTCAGGGAGTGGAGGTCGGGGGTAACTGGCCGAGTCAGCTCCTCCA
A_73_119503|614542	0.0138145	0.00415287	up	1.92338	1.92338	0.943641	NEU2	neuraminidase 2 [Source:HGNC Symbol;Acc:HGNC:7759] [ENSBTAT00000027552]	AGATTGTCTTTGTCATGTTCACCCTGCAGCAAGCCTTCCCAGCTGCGTTTTTGCTGCAGT
A_73_P038136|526430	0.00162122	0.000144315	up	1.92251	1.92251	0.942991	NCK2	Bos taurus NCK adaptor protein 2 (NCK2), mRNA [NM_001099036]	GGGGTCTTGAGACCTCCTAAACTGCATACTCAGTTTTTTGGATATTGTAATAAAAAAGTA
A_73_P069946|614206	0.00119027	7.42898e-05	up	1.92216	1.92216	0.942725	LOC614206		ACAAGTGCTCGACTATCACATCCAGGGAGATCCAGACCACCGTGAGCTTGCTGCTACCTG
A_73_P095296|618218	0.00142597	0.000111468	up	1.92194	1.92194	0.942562	NKAIN1	sodium/potassium transporting ATPase interacting 1 [Source:HGNC Symbol;Acc:HGNC:25743] [ENSBTAT00000026850]	AGAAGACGTCGCATTTACAACTGCAGCCTCTGTACACGTCTGGGTAGCGATTGCCCCACG
A_73_P409336,A_73_P035376|540937	0.00263804	0.000358016	up	1.92164	1.92164	0.942341	MARCH5	Bos taurus membrane associated ring-CH-type finger 5 (MARCH5), mRNA [NM_001034715]	AGCCCTTGTTTTTCCTACTATTGCGACAATAGTTGGTAAACTAATGTTCAGTAGTGTTAA///CAGCAATATTTACGTCAGGCACACCGCAAAATCCTAAATTACCCAGAGCAAGAAGAAGCA
A_73_116011,A_73_P038351|507122	0.000609441	6.30913e-06	up	1.92154	1.92154	0.94226	CDC45	Bos taurus cell division cycle 45 (CDC45), mRNA [NM_001024490]	GTTATGGACATGGTTTTAGACGCAGAGACAATGGTTTTTAACGGAATAAAATGGCGCCTT///ATGATTGAAGAGTCTGCAAATAAGTTTGGCATGAAGGACATGCGCGTCCAGACTTTCAGC
A_73_114787	0.0163359	0.00518313	up	1.92029	1.92029	0.941322		Rep: Nucleoporin 88kDa - Bos taurus (Bovine), partial (8%) [TC442860]	GGCGGGATCAACTCAGATTTATAATAGTCATTTCTTCCCCTGGTCTAATCAAAAGTAGGT
A_73_P367066	0.00196447	0.000209735	up	1.92009	1.92009	0.941173		Rep: ABC transporter, permease - Bacillus thuringiensis subsp. konkukian, partial (5%) [TC455428]	GCAGCTCATTTTCACCCATGGATCATCACATTCTTCATTTGTAAACATCTGAGGTTTTTA
A_73_102589,A_73_P102536|789216	0.00071998	2.06128e-05	up	1.91957	1.91957	0.940783	IRF1	Bos taurus interferon regulatory factor 1 (IRF1), mRNA [NM_001191261]	GCGCCTTGGTGTGATTTAAAATTGGAAGTATCATCTGACCACTAAGTCATGTGTGACCAC///ATCTGGATTAATAAAGAGGAGATGATCTTCCAGATCCCATGGAAGCACGCTGCGAAGCAT
A_73_P138981	0.000835202	3.10865e-05	up	1.91841	1.91841	0.939911		BovGen_12269 normal cattle brain Bos taurus cDNA clone RZPDp1056D0214Q 5', mRNA sequence [CO883944]	TTTTCCCCCCAGCCCTGTTCAAATTAACACAGTCGATAATAAAGGAATGAGTATCGTTAC
A_73_P107746|100174924	0.000730828	2.16283e-05	up	1.91801	1.91801	0.939613	LOC100174924	Rep: Probable HIT family protein - Pseudomonas aeruginosa (strain PA7), partial (10%) [TC446956]	TCTGTTTGACCATGACACTGCTGTAGAATCATAACCTGTTAATCAGTGTATTACTTTCTA
A_73_P297461,A_73_100056|518859	0.00160492	0.000141128	up	1.91794	1.91794	0.939558	NUDT21	Bos taurus nudix hydrolase 21 (NUDT21), mRNA [NM_001035331]	AGCCTTGTTTGCAGTCCCTAAAAATTACAAGCTGGTAGCTGCACCGCTATTTGAACTGTA///TTTTGATGTTATCTCTTTCCCAGTCCTGAAATTAGCACCTGCTTTCTATTGTCTGAATAG
A_73_P193572	0.00259919	0.000349621	up	1.91778	1.91778	0.93944		coiled-coil domain containing 34 [Source:HGNC Symbol;Acc:HGNC:25079] [ENSBTAT00000028456]	AGAAGTGAAGGATCTATCAGGAAAGAAGACTAAAAGGCCTGTGATAAGCCAGCCACACAG
A_73_111525	0.00280243	0.000395898	up	1.91639	1.91639	0.938391		PREDICTED: Bos taurus guanine nucleotide binding protein (G protein), gamma 2 (GNG2), transcript variant X1, mRNA [XM_005211654]	AGCAGAAAAACCTGAATGTGATGTGTACACTTTCACCCCCTCATAGACAATGTATTTGTT
A_73_121027,A_73_P361841|510586	0.00178673	0.000172785	up	1.91627	1.91627	0.938303	PEA15	Bos taurus phosphoprotein enriched in astrocytes 15 (PEA15), mRNA [NM_001075456]	GCGGAGTGTAGTAAATTTCTCTGTAAGGCAAAATAATCTAAAAAGACTAACCTGCCCTCC///GTGTGTACATATATATTCTACATATATGTATATTAAACCCGCACTGCCATGTGTACCCTT
A_73_P299406	0.011191	0.00314612	up	1.91608	1.91608	0.938159		Hw_Fat_46_050805_F12 Bos taurus CF-24-HW fat cDNA library Bos taurus cDNA, mRNA sequence [DV781241]	CATCATACTTTCTAGAAGTACTTTGCTCTGAGTACCTTGATAAGAATTGGAATATACCAC
A_73_P206192,A_73_P042781|535379	0.00145404	0.000115614	up	1.915	1.915	0.937341	ABCA1	Bos taurus ATP binding cassette subfamily A member 1 (ABCA1), mRNA [NM_001024693]	TTATGACTGAGGTGAATAAGACCTTCCAGGAACTGGCTGTGTTTCATGATCTAGAAGGCA///GACGTTGCAGTCCTCACATCTTTCCTGCAGGATGAGAAAGTGAAAGAAAGTTATGTATGA
A_73_P096276|514466	0.0247252	0.00890169	up	1.91486	1.91486	0.937238	ZDHHC19	Bos taurus zinc finger DHHC-type containing 19 (ZDHHC19), mRNA [NM_001075671]	CCTCTCCCCTGGCGGGAGTACTGAGATCCCAAGCGCATTAAATACCCTTTGCCTACGTTT
A_73_P122786	0.00193617	0.000203741	up	1.91436	1.91436	0.936864		PREDICTED: Bos taurus ethanolamine kinase 2 (ETNK2), mRNA [XM_612564]	TTTGTAAATGATCATCATTTCCTGCATTAAAATGGTCACGTATGGGCCAACCTGACAGCC
A_73_P084276|101902412	0.00461282	0.000868108	up	1.91313	1.91313	0.935932	ANGPTL8	angiopoietin like 8 [Source:HGNC Symbol;Acc:HGNC:24933] [ENSBTAT00000045880]	ATGGTTGAGGAAGGCTGTAGGAAGGATATGCCCCTTCATGCCTACACATTCCCTATTAAA
A_73_102305	0.0490668	0.0210657	up	1.91241	1.91241	0.935392		CR850431 Normalized and Subtracted bovine endometrium tissues (bcbp) Bos taurus cDNA clone bcbp0010.n.23 5', mRNA sequence [CR850431]	GACTCAACATTTCCCATGCCCCACATGCTGACGTTGCCAATATGCGCCTCCTTTAGGAGT
A_73_P048911,A_73_P415896|614151	0.000509628	1.85457e-06	up	1.91199	1.91199	0.935077	MRPL30	Bos taurus mitochondrial ribosomal protein L30 (MRPL30), mRNA [NM_001035443]	GCCCAACAGCTTCAGAGTAAAAAGTGGAAGTCATTTCTATTTAAAGATGGTGAGAAAGTT///TGAAAATAGTTAAACATTTGATAAGAATCAAGCCCCTGAAGCTGCCCCAGGGTCTCCCAA
A_73_P127796,A_73_104956|534848	0.0126467	0.00370964	up	1.91148	1.91148	0.934688	POLA1	Bos taurus DNA polymerase alpha 1, catalytic subunit (POLA1), mRNA [NM_001206065]	AATATACCTTGTGCTGTTGAAACACCACCAGGAAAACTGGCTGCTTCACTTTGGCATTCC///AAAGTATGCTGCTCTGATTGTTGAGCCAACATCAGATGGGAATTACGTCACGAAACAGGA
A_73_P044121,A_73_P321116|533251	0.012127	0.00350943	up	1.91106	1.91106	0.934377	RANBP1	Bos taurus RAN binding protein 1 (RANBP1), mRNA [NM_001034586]	CAACGCCGAGAATGCACAGAAATTTAAGACGAAGTTTGAAGAATGCAGGAAAGAGATTGA///AGATGAAGAGGAACTTTTTAAAATGCGGGCCAAGCTGTTCCGGTTTGCTTCAGAGAACGA
A_73_101066,A_73_P376651|510813	0.0234301	0.00827937	up	1.90969	1.90969	0.933336	LGALS9	Bos taurus galectin 9 (LGALS9), transcript variant 2, mRNA [NM_001015570]	GAAGCCTGCCACGAGGGATGCCCTTCTTCCGAGGCCAGAGCTTCTCGGTGTGGATCATGT///AACCTTCAAACCGGCTATAACGACAGTGACATTGCCTTCCACTTCAATCCTCGGTTTGAA
A_73_P493118	0.00219838	0.000260282	up	1.90778	1.90778	0.931895		GB	TTATGGTTGATACAGACCTCTAATGTTTTGGGTTCCTGTTTTCCCACCATTTCCCCTTTC
A_73_115482	0.0189225	0.00627028	up	1.90773	1.90773	0.931858		Rep: Mitochondrial dimethyladenosine transferase 1, mitochondrial precursor (EC 2.1.1.-) (S-adenosylmethionine-6-N', N'-adenosyl(rRNA) dimethyltransferase 1) - Bos taurus (Bovine), partial (21%) [TC433629]	TTCAGACTGTTTTAGTGACGATTATACACTTTGGGTGGAACAGTTATTCTCCCACTGCAG
A_73_P490653	0.000691745	1.70965e-05	up	1.90697	1.90697	0.931279			AAACACTCGACTATCACAAACAGGGAGATCCAGAACGCCGTGCGCTTGCTGCTACCTGGG
A_73_102731	0.000772416	2.59275e-05	up	1.90695	1.90695	0.931264		Rep: IpaD - Shigella dysenteriae, partial (11%) [TC417381]	TCTCAGGAAAAAGTACTTGTTCTTTTTGTTCCTGGCTTTCCTCAGTTTGTGAGATAACTC
A_73_P494402	0.00280736	0.000397267	up	1.90681	1.90681	0.931161			CCATACGTTACATACGGGGTACCCAAATTGAAGTCTGTAAATGAATTGATCTACAGGCGT
A_73_P059891|531459	0.00188979	0.000195696	up	1.90646	1.90646	0.930899	PSD3	pleckstrin and Sec7 domain containing 3 [Source:HGNC Symbol;Acc:HGNC:19093] [ENSBTAT00000039724]	GCTGGTCGTGGAGCAAAACAAGAGGTTTTCAAGATCTTTCTGGTAAATCCATGAATATAT
A_73_P346701,A_73_P034901,A_73_116708|286811	0.00217292	0.000252636	up	1.90608	1.90608	0.930605	EIF6	Bos taurus eukaryotic translation initiation factor 6 (EIF6), mRNA [NM_174830]	AGACAGACAGTGGCTGACCAGGTGCTGGTAGGAAGCTACTGTGTCTTCAGCAACCAGGGA///TGAAGACCAGGATGAGCTGTCTTCTCTTCTTCAGGTCCCCCTTGTGGCGGGCACTGTGAA///AGGTCCTATGGCTTCTGGCTGAGAGCTCTGTTGTCTGTGCCACCCCATTAAAGGGCAGCT
A_73_113769,A_73_P030211|768014	0.00770947	0.00186495	up	1.90606	1.90606	0.93059	KIF2A	kinesin family member 2A [Source:HGNC Symbol;Acc:HGNC:6318] [ENSBTAT00000065595]///Bos taurus kinesin family member 2A (KIF2A), mRNA [NM_001077073]	TCTCCAGTTCAAGCTGCAAAAAAGGAATTTGGACCCCCTTCACGTAGAAAATCGAATTGT///CTCGCTACTGTAACATAACAATCATTCAGCTGTAAGGGCCATTTGAAAGTTTGAAATCTT
A_73_P037151,A_73_117646|533029	0.00161581	0.000143342	up	1.90574	1.90574	0.930349	GMIP	Bos taurus GEM interacting protein (GMIP), mRNA [NM_001083465]	TTACTCAGGGTCAATATAGGTCATGGGATCCTTGAGACAGGGGTGCTTTTTGCTACTTTG///GCACACCAGGCTCAGCTCGTCGAGTTCCTCATTGTGCACTATGAGCAGATCTTTGGGCCT
A_73_P348596,A_73_113063,A_73_P283236|282855	0.00227991	0.000278437	up	1.90531	1.90531	0.930022	PCK1	Bos taurus phosphoenolpyruvate carboxykinase 1 (PCK1), mRNA [NM_174737]	AAATTTGACCAACAAGGTAACTTGCGGGCCATCAATCCAGAGAATGGGTTTTTTGGCGTC///ATATACCATGGTTCCTTACCTTTACATAATTTCAACATTTTCCCCTAACACTTCTTGGGA///GCACATGCGTGTGTGTCTGTGTACTGTCGTCTAAAACGTATTTAATGACTTTGGAAAAAT
A_73_P054346|101906662	0.0198028	0.00665468	up	1.90487	1.90487	0.929693	DEFB3	Bos taurus defensin beta 3 (DEFB3), mRNA [NM_001282581]	GAAACTGCGCCCTTCGACAGAACGTCTAAAATTTAAACCAGAATAAATTTTGTTCAAAGT
A_73_112324,A_73_P257151,A_73_P281726|534063	0.0015178	0.000124877	up	1.90319	1.90319	0.928421	EIF2B3	Bos taurus eukaryotic translation initiation factor 2B subunit gamma (EIF2B3), mRNA [NM_001083474]	CCCCAGAACTACAGATGTTGGCTGGCCCACCTGTTTGACTCTGTATTTATTTCCCAATAA///ATCATCTGCAACGATGCCGTAATTGAGAAGGGAGCAGACATCAAGAACTGCCTAATTGGA///AGTTTTATAAAAGAAGCCAATACACTGACCCTTGCTCCCTATGATACCTGCTGGAACGCC
A_73_P483523,A_73_P080541|533096	0.0079893	0.00196023	up	1.90318	1.90318	0.928408	ENTPD5	Bos taurus ectonucleoside triphosphate diphosphohydrolase 5 (ENTPD5), mRNA [NM_001192752]	TTGTATGGAATTATGTTTGATGCAGGGAGCACTGGGACGCGAATTCACGTTTACACCTTC///AATCTTTGAGGTTCCTTGTATATCAGAGAGCCAAAAGTAACAGCTTTGGAACTTAATCTT
A_73_P135586,A_73_P032801|615712	0.0011693	7.19577e-05	up	1.9007	1.9007	0.926532	EXOSC2	Bos taurus exosome component 2 (EXOSC2), mRNA [NM_001046561]	AAGCCAGAAATAATGGAGGAAATTGTGATGGAAACACGCCAGAGGCTTTTGGAACAGGAG///CAGGCCCTTAAAAGCATTCCGAGTTCCAGCCGAATACACTCCTATCCTGGAATCAAAAAA
A_73_P030116,A_73_P203467|538477	0.00114143	6.9188e-05	up	1.90061	1.90061	0.926466	RALA	Bos taurus RAS like proto-oncogene A (RALA), mRNA [NM_001034644]///LB02628.CR_H14 GC_BGC-26 Bos taurus cDNA clone IMAGE:8220352, mRNA sequence [DV883783]	AATGTCGACAAGGTATTTTTTGATTTAATGAGGGAAATTCGGGCCAGAAAGATGGAAGAC///TTAGAAACTGAAAGATACCTGGTTACATCATTCTGGGTTGTATCTGGCATCCTCATGGTG
A_73_120696	0.0110352	0.00308511	up	1.90045	1.90045	0.926338		LB0058.CR_E14 GC_BGC-05 Bos taurus cDNA clone IMAGE:8010328, mRNA sequence [DT853423]	CCCGCCATGTATTGTCGTCTCACCCTCCGTGGCCAGTCCTTGTGAAGGCACCAGCTCAGA
A_73_P433346,A_73_P326706,A_73_101531|514339	0.00223384	0.000269496	up	1.90036	1.90036	0.926272	SLC6A12	Bos taurus solute carrier family 6 member 12 (SLC6A12), mRNA [NM_001101994]	TGTGGTCTTCTCCATCCTGGGCTTCATGTCCCGGGAGCAGGGGGTGCCCATCTCTGAAGT///TCTCCTGCCTTGTTAACAAGCCCCATGGAGCGCTTGCTGCATGTGCCAACCTTTAAAAAA///CCTGGCCACTTTTTTCTTCTCCTTGAGCAAGTACACACCTCTCAAATACAACAACGTCTA
A_73_P069051	0.00119713	7.51735e-05	up	1.90016	1.90016	0.926118		Rep: Tubulin alpha-1A chain - Homo sapiens (Human), complete [TC401267]	ACAGACCCAAGCTATCCATTTCTCTGATGGGTTTGAATAAAGTATTCCCTGTCTTAAATG
A_73_101376	0.00100602	5.33534e-05	up	1.9	1.9	0.925999		Rep: LOC113230 protein - Homo sapiens (Human), partial (71%) [TC400707]	TCCTTCTGGCCTTGTCTGTTAGAGGACAGGGATCCTCGGCTGGGCCTACTCCCCAATAAA
A_73_P039956|540818	0.00359952	0.000591948	up	1.89949	1.89949	0.925613	GABPB2	Bos taurus GA binding protein transcription factor beta subunit 2 (GABPB2), mRNA [NM_001076242]	GGGTAGTCTGCTGTCAGAACAACTTGCTTTCAAACATTTATTTATGTAATGTCAAGCTTT
A_73_P092461	0.01025	0.00278133	up	1.89936	1.89936	0.925513		tudor and KH domain containing [Source:HGNC Symbol;Acc:HGNC:11713] [ENSBTAT00000028777]	AGTTTATCAGAAGCTGCCTCTATGTCTGGTGATGATAATCTTGAAGATGACTACTTACTC
A_73_114555|534326	0.0369107	0.0148056	up	1.89879	1.89879	0.925077	ADGRG6	PREDICTED: Bos taurus adhesion G protein-coupled receptor G6 (ADGRG6), transcript variant X3, mRNA [XM_614057]	ACATCGATCATTCCTGTCCATCAGGTCATTGATAAGGTCAAGGGTTATTGCAATGCTCAT
A_73_P104086,A_73_114773,A_73_P446141,A_73_P090091|538885	0.00252921	0.000332014	up	1.89828	1.89828	0.924692	CBX5	Bos taurus chromobox 5 (CBX5), mRNA [NM_001193213]	GGAGAAATCAGAAAGTAACAAGAGGAAATCCAATTTCTCAAACAGTGCTGATGATATCAA///CGGAAAACAAAGAGAAAGAAACAGCAAAGAGCTAAAGGAGGGGGTGGTCTCTGTCATTTC///GATTGCCCTGAGCTAATTTCTGAGTTTATGAAAAAGTATAAGAAGATGAAGGAGGGTTAA///TTATGAAGAGAGACTGACGTGGCATGCATATCCTGAGGATGCGGAAAACAAAGAGAAAGA
A_73_P267546,A_73_108225|514221	0.00212493	0.000242689	up	1.89619	1.89619	0.923103	COQ10B	Bos taurus coenzyme Q10B (COQ10B), mRNA [NM_001075654]	TGATATGTCTGCAGCACCATGCATCCTTATTTTCTATTTATTGTGTGTATTCACTTTCGA///ACTGCCTTTGAAAGAAGAGCGTGTAAGCTGTATGGTCCAGAAACAAACATACCTCGGGAA
A_73_113820	0.0326208	0.0126592	up	1.89502	1.89502	0.922214		Rep: Solute carrier family 25 member 40 - Bos taurus (Bovine), partial (32%) [TC467632]	AATCACAAACTCAAGGCCAAAAAACCACTACTTACTGTACTACTTGAGTGAACTGTTGTC
A_73_P400781,A_73_112099|513362	0.0102171	0.00276929	up	1.89309	1.89309	0.920746	NPNT	nephronectin [Source:HGNC Symbol;Acc:HGNC:27405] [ENSBTAT00000029948]	GATACACAGTTGTAATTTTGACCATGGGCTTTGTGGATGGATCCGGGAAAAAGACAGTGA///GAAAGCCACAGTACTGAGCTCATGAAAAGGTCTCTCTGTTTATGGCAAGCCTAGAAGTGT
A_73_113792|533577	0.00102679	5.61496e-05	up	1.89308	1.89308	0.920734	C8H9orf40	chromosome 9 open reading frame 40 [Source:HGNC Symbol;Acc:HGNC:23433] [ENSBTAT00000017603]	GTGCAGTTGTAGGGGAAGTACTTATGTGTGCATTCTTAAGAAAAATGTATGTGTAGGTTC
A_73_P042156|527312	0.00154663	0.000129237	up	1.89302	1.89302	0.920692	NSMCE4A	Bos taurus NSE4 homolog A, SMC5-SMC6 complex component (NSMCE4A), mRNA [NM_001038678]	GTGGGTGCTGAAATCCAAAAAGGAAAGCAGCATGTATTGTATATATTGTATGATCAAACA
A_73_100366,A_73_P257646|526006	0.0153973	0.00479041	up	1.89275	1.89275	0.920481	ENO2	Bos taurus enolase 2 (ENO2), mRNA [NM_001101125]	CCCCGTGCCATGTTTCACAGCTGCCAGCACCTCTGTGGCGCTGAAATGAACACTTCCATT///TTACCGCGATGGCAAATATGACTTGGATTTCAAGTCTCCTGCTGATCCTTCCCGATACAT
A_73_109764,A_73_P135776|615897	0.000938673	4.369e-05	up	1.89244	1.89244	0.920247	TOMM5	Bos taurus translocase of outer mitochondrial membrane 5 homolog (yeast) (TOMM5), mRNA [NM_001143740]///970193 MARC 4BOV Bos taurus cDNA 3', mRNA sequence [CK847546]	ATACCTGTGATATCAGCCTCAATGAATGTTGGTATAATTGTACATCATGATGTCAAACTC///CCAAGAGTCAGTGAAGAATCTCTACCATAAATAAAGAGGACTGAGGAGTGAAGCCTGGGA
A_73_P465753	0.0141239	0.00427115	up	1.89241	1.89241	0.920228		PREDICTED: Bos taurus OTU domain containing 1, transcript variant 2 (OTUD1), mRNA [XM_608638]	GGCACTACTTAATTTGCAAGCTGATTTCTCAGTGTAAATTTGTTCATTCCTGGTAATCTA
A_73_P284116,A_73_107683|533681	0.00119256	7.466e-05	up	1.89226	1.89226	0.920114	TMEM156	Bos taurus transmembrane protein 156 (TMEM156), mRNA [NM_001083469]	TAAATATGAACCTACATCTACCCTCTTACGAGGAAGTGATTTCTGAGAAAACTACGAACA///GTTGGTTGTTTATACATTTGCTTGCATCTGTAAATCTTGCCTCTTTTCGGCACTGAGATG
A_73_110727,A_73_P144951|513751	0.00155072	0.000129837	up	1.89137	1.89137	0.919433	DCTN6	Bos taurus dynactin subunit 6 (DCTN6), mRNA [NM_001075638]	TGATGACAGGACCTTTACTTTAATCAGTTTTTCTACTTGCATCAACTTTCCCAAAATAGC///AGACCATGAAAGGAAGCTCAACTCCAGTTAAGAACTAAGAACAATAGATGACATCAAGAT
A_73_P082541,A_73_119574|536359	0.00687513	0.00158246	up	1.89008	1.89008	0.918444	AP3S1	Bos taurus adaptor-related protein complex 3, sigma 1 subunit (AP3S1), mRNA [NM_001046416]	GAACTGGATTTAATTTTCCATGTAGACAAGGTTCACAATATTCTTGCAGAAATGGTGATG///CTTCCTGAGATCCCAAGAAATATTAACATTGGTGACATCAGTATAAAAGTGCCAAACCTG
A_73_P384496,A_73_118348,A_73_P043496|282082	0.000699123	1.83804e-05	up	1.88907	1.88907	0.91768	SSRP1	Bos taurus structure specific recognition protein 1 (SSRP1), mRNA [NM_001101041]	TACCTGTTTTCTCCTATGAAATGCAGTCCTTGGGTTCTGTGCCATCTGAAACAGCTTTCC///GTCCCAGCCCCAGTCTCCCCACCCGTGTTTTGGTACCTGTTTTCTCCTATGAAATGCAGT///CTGTAGCTCCTAACTGGGGCCTATTTCTACTTTTATTTTGTATTTCTGGTCTGTGAAAAA
A_73_112287|444868	0.00143559	0.000112509	up	1.88861	1.88861	0.917326	SLBP	Bos taurus stem-loop binding protein (SLBP), mRNA [NM_001045880]	GTAAATAGCACTAAGTGGGCCTTCTATCTATAATACTCCAAAAGTTAAGGCAGCAGAGGA
A_73_114512,A_73_P375041,A_73_P321781|519357	0.00353399	0.00057416	up	1.88829	1.88829	0.917079	DDB2	Bos taurus damage specific DNA binding protein 2 (DDB2), mRNA [NM_001075788]	AAGCTCAGGAAAGATCATGTATCAGCTGTATGACCCAGAATCTTCTGGTATCAGGTCGCT///ATCAGCTGTATGACCCAGAATCTTCTGGTATGGTGTCGCTCAATGAATTCAATCCCATGG///AGCCCAGCTCCTGACTACTGACCAGAAAAGTGAGATCCGGGTTTACTCTGCTTGCCAGTG
A_73_105254|523154	0.000870072	3.55631e-05	up	1.88795	1.88795	0.916822	GALE	Bos taurus UDP-galactose-4-epimerase (GALE), mRNA [NM_001206208]	CTAATTTATACTGCTATGAAGAAGCATCCCAAAGTATTTAAAATAAACAGTTTTCTTACA
A_73_P128361	0.00133722	9.84785e-05	up	1.88746	1.88746	0.916449		fibrosin like 1 [Source:HGNC Symbol;Acc:HGNC:29308] [ENSBTAT00000056742]	AAGGCATCTGTGGGCTCCGAGAAGCTCTTTGCCCCAGCAGCCGATAAAGGCCACACGCTG
A_73_P089811|534252	0.00432297	0.00078921	up	1.88699	1.88699	0.916087	TBC1D15	TBC1 domain family member 15 [Source:HGNC Symbol;Acc:HGNC:25694] [ENSBTAT00000030419]	CATGATCATTCTTTGAAGAGACACTTTGTTACAACTCTTTTTCAAGTACTTGAAAGGTGG
A_73_109545	0.00174364	0.00016364	up	1.88632	1.88632	0.915573			GCACAGCTAGCCTATAAATCTCTACAATTCTGTGAATTTCAACACTTGTTGAAATAGCTG
A_73_P401801	0.00550111	0.00113221	up	1.88467	1.88467	0.914316		C-X3-C motif chemokine ligand 1 [Source:HGNC Symbol;Acc:HGNC:10647] [ENSBTAT00000034627]	AATTGAGCTTTTCAACGAGGCTGCCTTCACCACCGCCACGTCTTGGCAGAGTTCTGCTGC
A_73_P073106,A_73_113447|519993	0.0238979	0.00850195	up	1.88376	1.88376	0.913618	LRP12	Bos taurus LDL receptor related protein 12 (LRP12), mRNA [NM_001192981]	TCTTGCTTAGAAGCAACGCTGAAAACTGAAACGAGTGATGATGAAGCTTTGTTACTTTGT///TTATTTTGCCCTTGAAAAAATTGACGTATCTTAGAAGATTCAGTAACTCTAGCAGCTCTC
A_73_118016	0.000512795	3.51689e-06	up	1.88315	1.88315	0.913148		Rep: Zgc:110361 - Danio rerio (Zebrafish) (Brachydanio rerio), partial (4%) [TC458001]	CGCCAGAATAGACGGCACCTGGGATCTGAGTGGCCCACCAGGACCTTTCTGCATTCTTTA
A_73_112199|532333	0.0104281	0.00285221	up	1.88224	1.88224	0.912453	CAVIN2	caveolae associated protein 2 [Source:HGNC Symbol;Acc:HGNC:10690] [ENSBTAT00000024617]	AACTGATACAGCTATGTCCTTATTTTATAATAATGTACCCCATATGTTATATTGTTGAAC
A_73_P148351|618737	0.015009	0.00463704	up	1.8822	1.8822	0.912421	LOC618737	112556 MARC 1BOV Bos taurus cDNA 5', mRNA sequence [AW669262]	ATTCGTTGTGATCGCGGTCTTGGTCCTCAACGCTCTGCTGACCTGAGATCCCAGAAAGCC
A_73_P110541,A_73_101127|506029	0.000765889	2.53116e-05	up	1.88105	1.88105	0.911536	STRADB	Bos taurus STE20-related kinase adaptor beta (STRADB), mRNA [NM_001192081]	CTCCAGGGAAACTTTGGAATTATTACTCTAACTACATTTAGTATCATCTGTAGATGACAG///CTAGAATTATACTTGAAAATACAGTTGGTGCACTGGAGAATCTGTCATTTAAAACCACTC
A_73_P067426|530449	0.0013862	0.000105722	up	1.88099	1.88099	0.911491	WDR62	WD repeat domain 62 [Source:HGNC Symbol;Acc:HGNC:24502] [ENSBTAT00000019966]	TTCCAGGAAGCCCTGGACCTTTACCACCTGATGGTCTCCAGTGATGAGGTGAACGCCGAA
A_73_P297136,A_73_P095411|517520	0.0485147	0.0207733	up	1.88028	1.88028	0.910949	CEP85	centrosomal protein 85 [Source:HGNC Symbol;Acc:HGNC:25309] [ENSBTAT00000012597]	CTTGAAAAGAAACTCTCTGCTTCACAAGTTGAAGTCCAGCTCATCAGAGAGTCACTCAGA///GTGAGTTACTAATTAACTGCAGGTAAATCCTCACAGACTGTTACCGGTAACAAGCTGATG
A_73_P063336	0.00712846	0.00166872	up	1.87988	1.87988	0.91064		contactin 4 [Source:HGNC Symbol;Acc:HGNC:2174] [ENSBTAT00000060980]	ATTCGAATTCCAAAGATATCAAATGCCTATGCAAGAGGAGCCGGGCCGTCCACTTCAAAT
A_73_P490198	0.00166402	0.000150405	up	1.87807	1.87807	0.909254		GB	ACAAGAGCTCGACTATCATATCCAGGGAGATCCAGACCGCCATGCGCTTGCTGCTACCTG
A_73_118846	0.00460672	0.000866609	up	1.87743	1.87743	0.90876		Rep: Keratin associated protein - Bos taurus (Bovine), partial (8%) [TC418634]	TAGCCACCAGCTACAGCCTGTAAAAAATCAGCTGTTTGAGAGCCTTGTGAGTTGTCTGTT
A_73_117599|538758	0.00252822	0.00033176	up	1.87724	1.87724	0.908616	C10H15orf41	Bos taurus chromosome 10 open reading frame, human C15orf41 (C10H15orf41), mRNA [NM_001015668]	CCCCATGTTGACATTATATTCTTTATAATGTTGAGTGAGTTTGGAAATATTAGTAAAAAT
A_73_P460511,A_73_103400,A_73_111571|505078	0.0282478	0.0105545	up	1.87635	1.87635	0.907933	APOL3	Bos taurus apolipoprotein L, 3 (APOL3), mRNA [NM_001100297]	GAGCTTTGAAAATGGAAGAAAGCCAAAGATTTAGGACTGTAGAGATCCAGCACAAGTAGC///AGACTGTAAAGCGTTCAGGTGCTGCTATGTTTTCCCACAAAGGTTCAGCTTTAACAAATA///ATGGTCTCTAACTCTACTTCTCCAGCATCAACTCACATTTGAACTCAGCAGGCAGTGACT
A_73_120220,A_73_P074016|527211	0.000512795	3.21683e-06	up	1.87629	1.87629	0.907883	SMOX	Bos taurus spermine oxidase (SMOX), mRNA [NM_001205439]	GTGCCTTCAATACTTTGCATTTTGGGATAATAAAAGAGGCTTGCCCTTCCTGTGCTCCTC///TTGTTATTGTAAGTGCCTTCAATACTTTGCATTTTGGGATAATAAAAGAGGCTTGCCCTT
A_73_104173|614335	0.00857987	0.00215509	up	1.87602	1.87602	0.907678	RAB3IL1	Bos taurus RAB3A interacting protein (rabin3)-like 1 (RAB3IL1), mRNA [NM_001046532]	ACCCCCTAGTGGCCATACTTCACCCCATTCCCAGATGGCCTCCCCAACGAAGGCTAGTGG
A_73_P063416|505750	0.0294061	0.0111072	up	1.87549	1.87549	0.907268	LRIG1	leucine rich repeats and immunoglobulin like domains 1 [Source:HGNC Symbol;Acc:HGNC:17360] [ENSBTAT00000030750]	GTCAGCACTTGCTTCTTTCCAACGGACACATCCCCCAAGCCTGTGACTCTGGTTCCGAGT
A_73_P042421|532659	0.00356559	0.000583044	up	1.87535	1.87535	0.907162	LRRC59	Bos taurus leucine rich repeat containing 59 (LRRC59), mRNA [NM_001034578]	TTGTTATACAAAGCTGTGTAAAGGCAAGACGCGTTTCTACTAAAGGTCAGCTGTCACTAC
A_73_P058351,A_73_P487728,A_73_P185677,A_73_119650|532864	0.00157892	0.000135622	up	1.87506	1.87506	0.906936	REXO5	Bos taurus exonuclease NEF-sp (MGC134577), mRNA [NM_001038154]	AGGCTGTTTAAGAGTTTTGGTCCAGTCCAGTTAATGACTCTTGTTCTTGAAACACATCAG///GCCGCTGAGGCGACGAGATCCCATTGGGATCTTGAGGAAAAGCAGCAACCTATAGCCAAG///TATGTGAATTGCTGAAGTATGCAGTTCTGGGCAAATCCAGCTTTCCTAAACCGAGCTGGT///TCCACAGGCTGCCAGACGTCTCTATATAGCAGACAGTTTGTGGAAACATTGTACTCACTT
A_73_111391|281249	0.00421686	0.000758925	up	1.87484	1.87484	0.906768	IL18	Bos taurus interleukin 18 (IL18), mRNA [NM_174091]	TCAAAGAAGTGTTCCAGGACATGATGATAAGATACAATTTGAGTCTTCATTGTACAAAGG
A_73_104611|539207	0.0079893	0.00195957	up	1.87483	1.87483	0.906759	BHLHE23	basic helix-loop-helix family member e23 [Source:HGNC Symbol;Acc:HGNC:16093] [ENSBTAT00000014445]	AGACAAGTGCGCCGCCTTCTCCGGGACGCCCTCGGCGCTTTGCAAACACTGTAACGAGAA
A_73_108250,A_73_P081861|530858	0.00342836	0.000546429	up	1.8744	1.8744	0.906431	PRKN	Bos taurus parkinson protein 2, E3 ubiquitin protein ligase (parkin) (PARK2), mRNA [NM_001199065]	TCCAAAGAAACAATCAAGAAGACCACCAAGCCCTGTCCCCGCTGCCACGTGCCGGTAGAA///TTGCTGGGAAGATGTCTTAATCCCAAACCGAATGAGTGGTGAATGTCAGTCTCCAAACTG
A_73_103516	0.00532653	0.00107682	up	1.87344	1.87344	0.90569		Rep: PP4377 - Homo sapiens (Human), partial (66%) [TC417834]	GTGTCCCCGCGTATTTATTTGTTGTAAATATTTGAGTATTTTTATATTGACAAATAAAAT
A_73_P094306,A_73_P035469|613729	0.00203043	0.000224274	up	1.87203	1.87203	0.904606	HMGB3	Bos taurus high mobility group box 3 (HMGB3), transcript variant 1, mRNA [NM_001076285]	CCATATATCAACAAGGCTGCGAAGCTGGAGAAGTATGAGAAGGATGTCGCAGACTATAAG///GGAGAAGTATGAGAAGGATGTCGCAGACTATAAGTCTAAAGGGAAGTTTGATGGCGCCAA
A_73_109273	0.00313331	0.00047293	up	1.87182	1.87182	0.904441			TAGTTTGGTGGAGTGCATTAGCTTTACCTGTAATGTTTGATGTTTTTGAGTATGCATTCA
A_73_P031396|100125941	0.00103262	5.67868e-05	up	1.8714	1.8714	0.90412	CLRN3	Bos taurus clarin 3 (CLRN3), mRNA [NM_001105504]	GACCTTCTGACCCGGCCTCACTCTCTTAAGTAATAAAGGCTTGTGTTACACGCCAAAAAA
A_73_P032541,A_73_115164,A_73_P341646|524920	0.00323259	0.000497861	up	1.87102	1.87102	0.903826	MYEF2	Bos taurus myelin expression factor 2 (MYEF2), mRNA [NM_001102085]///PREDICTED: Bos taurus myelin expression factor 2 (MYEF2), transcript variant X1, mRNA [XM_005211820]	CCACGGTTGGAACATTCTTACATCTGTTTTGCTGAATCTCCTAGTAAACATCATTTTTTA///TCCAATAATTCCAAGTTCATATAGAACTGATAATGTTGTAAGCCCCAAGTACAGTAACAG///CTAATGAGAGAAAAAGTTGGTGAGGTTACATACGTGGAGCTCTTTAAGGATGCGGAAAAA
A_73_P076051,A_73_117931,A_73_P369406|537616	0.00372623	0.000625812	up	1.87083	1.87083	0.90368	POLD3	Bos taurus polymerase (DNA-directed), delta 3, accessory subunit (POLD3), mRNA [NM_001167904]	TGTGGACCTGAAGAAATCTAGCAAAAAAGCAGAGCCTGTTAGGATGCAACAGAAAGAAAA///AAACCTCTGGTGCTGGTGGAGTTCTGTCTTTGCAAGGATAATGCAAATCCTGTGATCACT///GCCTGAAACAAAAATCTGCCTGTAATCCTCTTATCCTCCATTATAAAGTACACTGACACA
A_73_P068211	0.0379729	0.0153574	up	1.86972	1.86972	0.902819			ATTTCTGTGTGTTTTCCCTTTATCAGTCCCTTTCTGCTCATGAGCCGTGACTCCACTGTA
A_73_P508288,A_73_103838,A_73_P289196,A_73_P118836|510942	0.000655957	1.38452e-05	up	1.86967	1.86967	0.902785	CHRAC1	Bos taurus chromatin accessibility complex 1 (CHRAC1), mRNA [NM_001075478]///Hw_Liver_15_0520_D07 Bos taurus CF-24-HW liver cDNA library Bos taurus cDNA, mRNA sequence [DV789970]	TCACTTACGTTATGTTCTTCCCTGGCTGAGACGGAGCATAATGCACCTCTGCCATAAATA///CCAGTTGTGTCGACTCACATATGTATATTTTGAAATTAGTTCTTGTAAACAGCTAGATCC///CACTCACCTATAGTGACTTATCAAATACTGCAGAAGAGTCGGAAACTTTTCAGTTTCTTG///TCCTTTTGTTTCATAATTTTGGCACCCTATTTCCTACAAAAAAGGGCAAGGGGGAAAAAA
A_73_P145826	0.00326086	0.000505844	up	1.86919	1.86919	0.902414		Rep: Sprouty-related, EVH1 domain-containing protein 2 - Homo sapiens (Human), partial (85%) [TC447549]	AGTGTAGTATTTTCCCAGTCCGCTTTGCCATACTTAATGTCAATCATCTGAGAGAAATTA
A_73_108871|517598	0.0298493	0.0113292	up	1.86887	1.86887	0.902163	XKR4	XK related 4 [Source:HGNC Symbol;Acc:HGNC:29394] [ENSBTAT00000060990]	GAATGTTCGCCGTCTCCTCCTAGGCTGCAGTACAAAGACGATGCTCTCATTCAGGAGCGG
A_73_119252,A_73_P234142,A_73_P447561|513585	0.000754999	2.45958e-05	up	1.86876	1.86876	0.902081	C14H8orf33	Bos taurus chromosome 14 open reading frame, human C8orf33 (C14H8orf33), mRNA [NM_001046153]	AAGGATGTCCTCTCAAGTGGTATGGCGCTCCATACCATTGAGTCCCATTGCTGTAATAAA///AGTTTAGGTTTAATTTCTTTTAGCCTCTTCCCTAGAGTGGCCACCTCTGCAGTGATGTGG///AAGCAGAAAGAACAAGCTCTTGGAGCCATCCGAACCTTGCGCAGCCAGAGAACCCCTCTG
A_73_P251271,A_73_P045876|509793	0.00215326	0.000248466	up	1.86846	1.86846	0.901849	NLE1	Bos taurus notchless homolog 1 (NLE1), mRNA [NM_001014887]	ATGGAGGAGATGAGAAGCCCCCCAGGTCTCTGGGATCCCCATCTGGACTCAGCTTCTGCC///TCGCTAGCACGAGCATGGGCAGCAGAAGGCTGGGCGATGACCAGCTGCTGCCTTTTCTAA
A_73_P107251,A_73_P280851,A_73_108770|539175	0.000655957	1.39396e-05	up	1.86842	1.86842	0.901821	DUSP1	Bos taurus dual specificity phosphatase 1 (DUSP1), mRNA [NM_001046452]	ATGAGGCAATTGACTTCATAGACTCCATCAAGAATGCTGGTGGAAGGGTGTTTGTGCACT///TCTTGTCCCTGTTTCCTGAAGACACTTTTCATGCTTGACCTACCTACCAGTATTACCATT///TGTCCTGTAAATATATCCTAAGCAGGTTTGTTTTCAGCACTGGAAAGCACCAGTGTTGAT
A_73_121222	0.00854575	0.00214164	up	1.8681	1.8681	0.901574		Rep: D-beta-hydroxybutyrate dehydrogenase, mitochondrial precursor - Bos taurus (Bovine), complete [TC430294]	GCATTTTTGGCCCAAAGAGGATATGTGAATTGCCTTTTATTGCTTATAAGTCAATTTTGC
A_73_P090321,A_73_P363486,A_73_P099793|404053	0.000726527	2.14286e-05	up	1.86794	1.86794	0.901449	TUBA1A	Bos taurus tubulin, alpha 1a (TUBA1A), mRNA [NM_001166505]///Rep: Tubulin alpha chain - Torpedo marmorata (Marbled electric ray), partial (69%) [TC435833]	AACCTGAATAGGCTGATAGGTCAAATTGTGTCCTCCATCACTGCTTCCCTGAGGTTTGAT///TTGTTACAGACCCAAGCTATCCGTTTCTCCGATGGGTTTGAATAAAGTATTCCCTGTCTT///TGGTTTTCCACAGCTTTGGTAGGGGGGAACTGGTTCTTGGGTTCACCTCCCCTGCTGATG
A_73_P066351|511515	0.0302467	0.0115365	up	1.86757	1.86757	0.901166	AATK	apoptosis associated tyrosine kinase [Source:HGNC Symbol;Acc:HGNC:21] [ENSBTAT00000025356]	TGTGTCCTTCTTCGACGACGTCACTGTCTACCTCTTTGACCAGGAAAGCCCCACCCGAGA
A_73_P064471	0.00219685	0.000260017	up	1.86754	1.86754	0.901138		adaptor related protein complex 3 sigma 1 subunit [Source:HGNC Symbol;Acc:HGNC:2013] [ENSBTAT00000048949]	CTAGATTTAACTTTCCATGTAGACAAGATTCACAATATTCTTGCAGAAATGGTGATGGGG
A_73_P086796,A_73_P049426|504630	0.00323259	0.000498003	up	1.86656	1.86656	0.900378	CENPP	Bos taurus centromere protein P (CENPP), mRNA [NM_001105615]	GACCTCAGCATAATAATGGAGCCTACGGAATATTCAGAATTAAGTGAATTTGTGTCTAGG///CATTTGCTCTTTTCCACTTAGAAACCTTACCTTTAGAACATGTTTATGCAATTATGGCAC
A_73_P048456|614282	0.00743834	0.00177607	up	1.86511	1.86511	0.899257	ARL10	Bos taurus ADP ribosylation factor like GTPase 10 (ARL10), mRNA [NM_001076320]	AGGAGTTTGTGAATGAAGTGGATGTGCTGGTGTTCATGGTGGACTCGGCTGACCGGCTGC
A_73_119515	0.00271657	0.000375808	up	1.86495	1.86495	0.899139		PREDICTED: Bos taurus mastermind-like domain containing 1 (MAMLD1), mRNA [XM_001789628]	TGACATTTTAATTGCCACCTGGTATTTTGCCTCTGCTTTTGAAATCTGGCATCTGTTTCA
A_73_111925|541283	0.00607642	0.001323	up	1.86464	1.86464	0.898896	IFRD1	Bos taurus interferon related developmental regulator 1 (IFRD1), mRNA [NM_001034729]	CCTTGACCACTGAGGGCAGTAACACTAATTTTATCTGCTGTGTAAGACCTTGTGCTCTTT
A_73_112687	0.0193942	0.00647457	up	1.86462	1.86462	0.898881		Rep: MGC151861 protein - Bos taurus (Bovine), complete [TC446933]	CTGGGAGTGAGTGTCCTCCTGTGTTACTACTTGAGCCCACTCACTCATTCAAAAAACATT
A_73_121102	0.00312943	0.000471869	up	1.8644	1.8644	0.898709		Rep: Retinitis pigmentosa 9 protein - Homo sapiens (Human), partial (39%) [TC418932]	GTTCTGCCGTAGGTTCCACCTCCAGGGTGGAGCTACTTGTGTAGAGCTCAGGCCTGATTT
A_73_P060479	0.00915256	0.00236317	up	1.86325	1.86325	0.897818			TTGAATCGACGGAACAGCTACCGTCTCGACCTTCTCAATTAGACGTGTCTTTTTCTGCAT
A_73_121228,A_73_P382786,A_73_P252581|404169	0.00062678	8.70723e-06	up	1.8631	1.8631	0.897707	PKIG	Bos taurus cAMP-dependent protein kinase inhibitor gamma (PKIG), mRNA [NM_205812]	GCCCTTTCTACCAAGATAAGTGATACCTAGGACCCAGGAAATAAATGCTGACGATTTGTG///CGGGCACACTTTCACGACGCTGTAACCACAAGGATGTAATTTATTCAGGGGGCGCTGGGA///AGCCTTTCCAGCCTTTTGAGTCAGGACACCTTCTTACCCCGTTTTTTAAAAAGCACTTTT
A_73_P069266,A_73_P103631|508575	0.00679571	0.00155565	up	1.86271	1.86271	0.8974	G2E3	Bos taurus G2/M-phase specific E3 ubiquitin protein ligase (G2E3), mRNA [NM_001038671]///Rep: G2/M phase-specific E3 ubiquitin-protein ligase - Homo sapiens (Human), partial (43%) [TC397822]	GCTCTTCCTATCACCAGTACATATAAAGAATTTCAAGAAAGTATGGACTTCGCCATAAAA///GAACAAAATTGGGAATGTTGCGAATGTAGAAGTATTCTCTACAGTGCAGGTAATATTTTG
A_73_114564,A_73_P046186|538050	0.00247575	0.000320024	up	1.86251	1.86251	0.897251	RAB7B	Bos taurus RAB7B, member RAS oncogene family (RAB7B), mRNA [NM_001078013]	TAACTGACCTGGAGTCCTTCGAAGCCCTGGAAACCTGGCGGGGTGATGTTCTGGCCAAAA///TTCAGTGGGCGTAGGGACCATTCTAAAAGTGCACAACAGATAATAAATGTCTTTCTTAGT
A_73_P289306,A_73_P404646,A_73_P203602,A_73_P348576,A_73_P047421|540276	0.00084294	3.2112e-05	up	1.86111	1.86111	0.896164	SRSF3	Bos taurus serine and arginine rich splicing factor 3 (SRSF3), mRNA [NM_001034700]	GACACAAAGGTGTAATTCTCTATGGTTTGAAATGGATCATATGAGGCATGTAATATCAAG///AATGGTAACAAGACTGAATTGGAACGAGCTTTTGGCTATTATGGACCACTCCGAAGTGTG///AGCCGATCTAGGTCAAATGAAAGGAAATAGAAGACCAGTTTGCAAGAAGAATGATGTACA///TAAGAGTGGAACTATCGAATGGTGAAAAGAGAAGTCGTAATCGTGGCCCACCTCCTTCTT///AATCTCTTAACTCCTGCCCAGTCGATGTTTAACATGATGGAAATAAAAACTGGCAAAAAT
A_73_106357|280960	0.00517708	0.00103222	up	1.86081	1.86081	0.895932	XDH	Bos taurus xanthine dehydrogenase (XDH), mRNA [NM_173972]	ATAACCTCAGATGCACACTTAGATTTGCAATGGGACAGTGGGGTGCAATTCAAACCTCTG
A_73_P107636,A_73_115644,A_73_P108076|281572	0.00194276	0.000204943	up	1.85979	1.85979	0.895139	VEGFA	Bos taurus vascular endothelial growth factor A (VEGFA), transcript variant 3, mRNA [NM_001316992]///Bos taurus vascular endothelial growth factor A (VEGFA), transcript variant 1, mRNA [NM_174216]///Bos taurus vascular endothelial growth factor A (VEGFA), transcript variant 4, mRNA [NM_001316956]	TTTGTACAAGATCCGCAGACGTGTAAATGTTCCTGCAAAAACACAGACTCGCGTTGCAAG///CTAAATCACCGAGCCCGGAAGATTAGAGAGTTTTATTTCTGGGATTCCTGTAGACACACC///GTTTTATTTCTGGGATTCCTGTAGACACACCCACCCACATACATACATACATTTATATAT
A_73_P046076,A_73_112147|513762	0.000709557	1.99945e-05	up	1.85978	1.85978	0.895134	GLRX2	Bos taurus glutaredoxin 2 (GLRX2), mRNA [NM_001040523]///CR552673 Normalized and Subtracted bovine embryonic and extraembryonic tissues (bcaz [CR552673]	TCATTGGAAGAGAGCAATCAGTTCCACCTGCTGGGATCTAACTCAGAATAAAAACGTGGT///CCACTGGTTCACCAGTGTCATTTAAAAAACAGTAAGAGGGAAGAACTTTAGTGATGTAAG
A_73_107032	0.0196952	0.00660431	up	1.85854	1.85854	0.89417		growth regulation by estrogen in breast cancer 1 like [Source:HGNC Symbol;Acc:HGNC:31042] [ENSBTAT00000010886]	TGATCTTCTCAAGAAATTTAAGTTTCTCAAAGGTGCTACCCTGTGTGTCATCTGCCAAGA
A_73_P293041	0.000870559	3.56162e-05	up	1.85758	1.85758	0.893423		Rep: MAP kinase-activated protein kinase 2 - Homo sapiens (Human), partial (60%) [TC421138]	CCCTCGACACTGTGCTCATTTGGCAATTTTATCAGTAATTTGACTTAGAATTTTTACGAA
A_73_P058421,A_73_P403001,A_73_P268611,A_73_117432|532099	0.00178158	0.000171635	up	1.85708	1.85708	0.893035	HS3ST2	Bos taurus heparan sulfate-glucosamine 3-sulfotransferase 2 (HS3ST2), mRNA [NM_001205994]	AAATTTTATGAAACTGTTGGGCAGGACTTCAGGTGGGAATGAGCCACAGAGATTCAAGGG///ACGCTCTCGCTCTCCTGCACTTACCTGTGTTACAGCCTCCTGTGCTGCTGCGACGACCTC///TTCAGCATGCAATGGAATCATGCTTGTCCATGTGAAATAAATACGGCTCTCTCATGTCAA///CTGGCCACTCTTAGGAGACAGACCCTTTGCTGATGAAATAAACCAGTGATTTCAAAGCCT
A_73_116617	0.0458093	0.0193708	up	1.85675	1.85675	0.892783		Rep: Dual specificity phosphatase DUPD1 - Bos taurus (Bovine), complete [TC445727]	ATTTGGCTTTGTCTGAAAGTCACATTCTTAAAAATATAATTTTAAAATATAACTTTATTT
A_73_P495398	0.00416384	0.000745739	up	1.85525	1.85525	0.891617			TACCAGTGTCTTCAGTATCATGTGGAAAAGACCTTTTTATTCTCATCACAATTAGAGAAC
A_73_P076776,A_73_P132011|509351	0.00306117	0.000456333	up	1.85519	1.85519	0.891571	FAM111B	Bos taurus family with sequence similarity 111 member B (FAM111B), mRNA [NM_001205654]	GGCATTTTTATAGCCATGTAAATAAGGCTTATGCCCTTATTGAATTTGGCTATTCTATGG///CAGGATGTATTGTACAACACAGGAAATAGAGCCAATATTTTATGACTGTAAATGGAGTGT
A_73_P082216|789468	0.0457722	0.0193496	up	1.8538	1.8538	0.890486	PAIP2B	Bos taurus poly(A) binding protein interacting protein 2B (PAIP2B), mRNA [NM_001302949]	TTGAGCAAAAGTAACCTGAATCCGGATGCCAAGGAATTTATACCAGGAGTGAAGTACTGA
A_73_P138806,A_73_P041831|100125389	0.0118362	0.00339644	up	1.85353	1.85353	0.890276	MACROD2	Bos taurus MACRO domain containing 2 (MACROD2), mRNA [NM_001105029]	TGGTGAAAGAAATAACATCCGATCAGTTGCTTTTCCATGCATCTCAACAGGCATTTATGG///TTCTGGTCCCTGTCTGCTTTCTCGGTTATTTCACAAAGCTGGTTGGTACAGTGGTTTCTT
A_73_118813|617166	0.010717	0.00296134	up	1.8525	1.8525	0.889475	KANTR	Bos taurus KDM5C adjacent non-coding transcript (KANTR), transcript variant 1, long non-coding RNA [NR_132122]	TCACCTACCTGTCATCCACTTATCAACTGGGAAATTGTCTCCTGTTATTTTTTGTTCTTG
A_73_P487963	0.000557555	4.85919e-06	up	1.85182	1.85182	0.888948			CCAGAGAATGAGGCGATTTTCGTTTTGTGCTCTCACCTAAAATTTTCCTCCTATTTTTAT
A_73_116581|526609	0.00133386	9.77705e-05	up	1.85179	1.85179	0.888919	SLC31A2	Bos taurus solute carrier family 31 member 2 (SLC31A2), mRNA [NM_001034556]	AATCACTGCTGTCTACTGTAATGTCTACATTCAAGTACCTCATGGGCGAGAGGAAAGATG
A_73_120568|533491	0.00425226	0.00077053	up	1.8506	1.8506	0.887991	RASA2	Bos taurus RAS p21 protein activator 2 (RASA2), mRNA [NM_001193020]	TACTAGAAAATTTCAATCCATGACTATTCAGAGCTTTCCGTTTAGTTCATCTAGACCCTT
A_73_117330,A_73_119376|536901	0.0032305	0.000497066	up	1.85025	1.85025	0.887719	CDYL2	Bos taurus chromodomain Y like 2 (CDYL2), mRNA [NM_001163785]	GCTTGGTCTTAACAACCCAACCAAGTGATTTACAAAACCCAGATATTGTACATTTAGGAG///AAGCAGCTCTGGAGCTCCTCCAAAGGCCTGGATTCCCTCTTCAGCTACCTGCAGGACAAA
A_73_P058601,A_73_108371|282200	0.0358499	0.0142671	up	1.85015	1.85015	0.887639	COX6A2	Bos taurus cytochrome c oxidase subunit VIa polypeptide 2 (COX6A2), mRNA [NM_174522]	TTTTTTCCACAATCCCCGGGTCAACCCTCTGCCCACGGGCTACGAAAAGCCTTGAGGCTT///TCAACCCTCTGCCCACGGGCTACGAAAAGCCTTGAGGCTTGGCTGATGCCCCCAGACACA
A_73_P037181,A_73_P166080|510347	0.00108511	6.27372e-05	up	1.84909	1.84909	0.886818	MRPL15	Bos taurus mitochondrial ribosomal protein L15 (MRPL15), mRNA [NM_001075445]	GCTTTGCAAAGATCTGTTGTATCTAAACCACGTGGAAGCTTAATTTATCCTGATGTAATT///ACATGGCAGACAAGAAGATTCTGAAACCTACGGATGAGAAGCTGCTTGAGTACTACAGCT
A_73_105691	0.0233563	0.00824706	up	1.84684	1.84684	0.885062		152660 MARC 4BOV Bos taurus cDNA 5', mRNA sequence [BE664798]	GAGAGAAGTCTTTGCAATAAAAAAGCTCCCCCTTTCCCTTAAAGATGTTGCAGTTTTCCT
A_73_P037811|509493	0.00950096	0.00249584	up	1.84638	1.84638	0.8847	SPX	Bos taurus spexin hormone (SPX), mRNA [NM_001075407]	AGTCAGCTATACAGTCGACAGTTTTTCAGTACTGTCTGAAAAATAAAATATGCACTACCT
A_73_P435751,A_73_106928,A_73_P440781|517588	0.000655957	1.15873e-05	up	1.84596	1.84596	0.884368	GLI1	Bos taurus GLI family zinc finger 1 (GLI1), mRNA [NM_001099000]	TCTTCCTGCACCTCCCTGGAGAAGCCGAGCTGAGTATCCAGGATACAACCCCAATGTAGG///ACACAGTCTAAATATATTTGGGGAGGAATTTTATAATGACACTGTTTCCTGATAATAAAG///TCATTCTACAGGACACCTCAAGGCGCAGCTTGTGTGTAATTATGTTCAGTCTCAACAGGA
A_73_P071576	0.00194276	0.000205027	up	1.84573	1.84573	0.884193		mitogen-activated protein kinase-activated protein kinase 2 [Source:HGNC Symbol;Acc:HGNC:6887] [ENSBTAT00000015530]	TGGAGGACAAGCAATAACTCTCAACCTGGCTGGATTTTTTAAACAGAGAGACCCAGAGTC
A_73_P083021|784304	0.0449201	0.018923	up	1.84568	1.84568	0.884152	CMPK2	cytidine/uridine monophosphate kinase 2 [Source:HGNC Symbol;Acc:HGNC:27015] [ENSBTAT00000026613]	GTATAACGAATGTTTGGTTGGAACGAGTTCTTAAACTACACCCTCACCGAGTCCTTCCAA
A_73_P411126	0.00100602	5.34283e-05	up	1.84555	1.84555	0.884049			CAGTACCTTTTGTTTGATGTTGCTGACAAGACCTAAAGATAATCCCTTAAAAAATCTACC
A_73_P358716	0.00631921	0.00140063	up	1.84529	1.84529	0.883846		Rep: Zgc:153020 - Danio rerio (Zebrafish) (Brachydanio rerio), partial (20%) [TC431907]	TTAAAGGTTTTGCTTGCCTGGAAGTCCGCACTTCCCACAGTTTCTGTGCACTTAAGTCTT
A_73_P459296,A_73_P256806,A_73_100055|777770	0.000677244	1.60184e-05	up	1.84518	1.84518	0.88376	KIF3C	Bos taurus kinesin family member 3C (KIF3C), mRNA [NM_001078155]	CACCAAGAATGTCAAGGAGATAGAGCACGTGATGAACCTGGGGAACCAGACCCGGGCAGT///GTGGCCCGTTCTTTTCACTCTATACAGTTGACGATACAGGACATATGTAATATATAAATA///CCTGCAGGCCCCAGCCCTGTTCAAATTAACACAGTCGATAATAAAGGAATGAGTATCGTT
A_73_117756	0.0069021	0.00159235	up	1.84445	1.84445	0.883189		SIX homeobox 1 [Source:HGNC Symbol;Acc:HGNC:10887] [ENSBTAT00000016104]	AAACAAGTGCCTAAATGTCTTAATGCTCTCTATGTGAGGCAGTTAGAAATAGAAGTGACC
A_73_P073606	0.00380439	0.000646759	up	1.84425	1.84425	0.883033		LB02968.CR_B13 GC_BGC-29 Bos taurus cDNA clone IMAGE:8478063, mRNA sequence [EE364781]	AATCGAGTGACTGGTCTGTTCCCAGGAAACTATGTGGAATCAATCATGCACTATACTGAT
A_73_107936	0.000515165	3.6271e-06	up	1.84386	1.84386	0.882728		treacle ribosome biogenesis factor 1 [Source:HGNC Symbol;Acc:HGNC:11654] [ENSBTAT00000020259]	TCCGGCTGATGCTGAGGCTTTGTCCTCCTTTTGTCAGTTTTTTCCTTTTTTGTTTGTATG
A_73_105169,A_73_P113151,A_73_P206337|528410	0.00108248	6.23713e-05	up	1.84365	1.84365	0.882566	WIPI1	Bos taurus WD repeat domain, phosphoinositide interacting 1 (WIPI1), mRNA [NM_001099040]	GCAAAAGGTGTTTGCAGTGACCAGAATAAATCATTTATGACCTTTCAGTCCCATTTAGGA///TTCACAACATCAAGGACATGAAGCTTCTGAAAACCATCCTGGATATTCCCGCAAACCCGA///ACAACCTGGACCCTCAGGACGGAGGAGACTGTGTCCTAATCAAGACCCACAGCTTGCTTG
A_73_P045856|514631	0.00670389	0.00152493	up	1.84348	1.84348	0.88243	CDCA7L	Bos taurus cell division cycle associated 7 like (CDCA7L), mRNA [NM_001104977]	TTAAAACTTGAACCAAAAGTAGACTGTCACATTACTGACACTGGAGGCCTTGGAGGGTGG
A_73_P067631|520157	0.00195963	0.000208373	up	1.84299	1.84299	0.882052	HIPK4	homeodomain interacting protein kinase 4 [Source:HGNC Symbol;Acc:HGNC:19007] [ENSBTAT00000052307]	GCCATCCCCTGAACCGACAAATTATTCTTACAGAAAGATAGTTATCCAGAAATTCCCCAC
A_73_100363|282873	0.0196952	0.00660397	up	1.84278	1.84278	0.881883	ACSS1	Bos taurus acyl-CoA synthetase short-chain family member 1 (ACSS1), mRNA [NM_174746]	GGCTGGAGGGTGCAATTTGGGTTACTGTTTGGCTTGTTGGAAATTTAAGTTGGAAATGTT
A_73_P041496,A_73_118267|521073	0.000904753	3.99283e-05	up	1.84259	1.84259	0.881735	TIMM9	Bos taurus translocase of inner mitochondrial membrane 9 (TIMM9), mRNA [NM_001046254]///translocase of inner mitochondrial membrane 9 [Source:HGNC Symbol;Acc:HGNC:11819] [ENSBTAT00000013873]	TTGAGGCCTTAAGATTCAGCAGCTTGGTCACTTGATTAGAAAAATAAACCATTGTTTCTT///TTTTTCAATCACGATCATCCTCCAAGTATTCCTGTTCATTCATGTCTGCCTCAAATTGCT
A_73_119851|522230	0.000709557	2.01208e-05	up	1.84234	1.84234	0.88154	NDUFAF5	Bos taurus NADH:ubiquinone oxidoreductase complex assembly factor 5 (NDUFAF5), mRNA [NM_001206395]	GGCAACAGTATCGTTTGGAGAGCTCGGAAAAATAAACGATCTTATGTCACAAGGGAAGAA
A_73_110251|533794	0.000699123	1.78643e-05	up	1.842	1.842	0.881274	SLC25A33	solute carrier family 25 member 33 [Source:HGNC Symbol;Acc:HGNC:29681] [ENSBTAT00000004127]	CTCGCATCACCTGTTGGACATTTCCTTTTGGATTCATGCTTTCTGGAAGGTTTAAATTCA
A_73_P045121|515736	0.0148387	0.00456484	up	1.84182	1.84182	0.881128	LOC515736	Bos taurus uncharacterized LOC515736 (LOC515736), mRNA [NM_001034509]	GTATCGCTGGTAATGGAGTCCACTTTAACAAAATTTGTATACTTTTGACACAAGGATGAT
A_73_P126351	0.000957023	4.66929e-05	up	1.83759	1.83759	0.877818		Rep: Cell division protein kinase 8 (EC 2.7.11.22) (EC 2.7.11.23) (Protein kinase K35). - Canis familiaris, partial (76%) [TC419280]	GCATGCTTTAAGATGAAAAAAGCATGAGTGATAACTTCCTTAAAAAGGTGCGGCATCCGA
A_73_P447211,A_73_117430|540294	0.00380439	0.000646666	up	1.83681	1.83681	0.877203	MED20	Bos taurus mediator complex subunit 20 (MED20), mRNA [NM_001103293]	AGAGAGAGAACAGTTTTCTTATATAAAGGCCATGACCTGGAGTTGCTCCAGTCACTCTGG///AGTTCGACTTTCTGACTGTAGAATCTGTCATCCGTGTTTTTTGTTCTCACCTTCCCCTGG
A_73_110972|535344	0.00629982	0.00139312	up	1.8362	1.8362	0.876725	ZC3H12A	Bos taurus zinc finger CCCH-type containing 12A (ZC3H12A), mRNA [NM_001102187]	TATTTTACACGGAAAGCCCTTGCCTCTCTTCACACTTCAATAAAGTACAATGTGAGTGCT
A_73_110726|511119	0.00236846	0.000297815	up	1.83581	1.83581	0.876417	GJC1	Bos taurus gap junction protein gamma 1 (GJC1), mRNA [NM_001046076]	GCAATAATACAGTTGCAGAACTTTACATTTGTGTCTTCCAGATCTGGAAAAGAACAGATA
A_73_P059246|536656	0.00939275	0.00245328	up	1.83465	1.83465	0.875504	MCU	Bos taurus mitochondrial calcium uniporter (MCU), mRNA [NM_001206102]	AGACTGAGAGACCCATTACAAGTACATCTGCCCCTCCGACAAATTGGTGAAAAAGATTGA
A_73_103388	0.00612388	0.00133776	up	1.83388	1.83388	0.874898		516764 MARC 3BOV Bos taurus cDNA 5', mRNA sequence [BM255117]	TTCTAAAAGAAAGCTCAGTCTTTTTCGCTACCAGATCAGGTTAGCACAGTATAGAGCACT
A_73_P046241|789755	0.0461406	0.0195566	up	1.83315	1.83315	0.874324	CD300LB	Bos taurus CD300 molecule-like family member b (CD300LB), mRNA [NM_001105023]	GGGGCCTCTGCTCTCTGGAGACCAGGCTGCTCACAATAAATCATCTCCATAGTTTCTCAT
A_73_P033066,A_73_P253156|508402	0.00160161	0.000140482	up	1.83302	1.83302	0.874223	ARPC1A	Bos taurus actin related protein 2/3 complex subunit 1A (ARPC1A), mRNA [NM_001075359]	GTGGCGCAAACCTCGTTGTGTGTGTTGTTTGAATATAATTGGTGAAAATGTTGGTTTTTT///TTCAAATGCAGAGTGTTTTCTGCCTACATTAAAGAAGTGGATGAGAAGCCAGCCAGCACG
A_73_107646|517909	0.0149603	0.00461689	up	1.83289	1.83289	0.874119	SGK2	Bos taurus SGK2, serine/threonine kinase 2 (SGK2), mRNA [NM_001075760]	TCATCAGAAATGGAAATAGTATTGTCAAAGTACACAACTTGCTATGAGTTGTGAAACACC
A_73_P204047	0.00207109	0.000232678	up	1.83275	1.83275	0.87401			TTTTATAGTGTGCTGGGAGAAAATGTTGAAGACCTCAGAATTCAGAGGGAAGGCAGGGCA
A_73_P032296,A_73_P114046|530709	0.017197	0.00555913	up	1.83261	1.83261	0.873902	USH1C	Bos taurus USH1 protein network component harmonin (USH1C), mRNA [NM_001035382]	CTAAGATTGATGCCACAACCTTACTCTGAACTCATTAATAAAATAAGCAGCCTTCTTTTC///ATTGTGAAAGGGGATGAGATCATGGCCATCAATGGCAAGATCGTGACAGACTACACCTTA
A_73_P031771,A_73_109818,A_73_P098966|281209	0.000818142	2.969e-05	up	1.83193	1.83193	0.873361	GPX1	Bos taurus glutathione peroxidase 1 (GPX1), mRNA [NM_174076]	TAAGTTCATCACCTGGTCCCCGGTGTGCCGCAACGACGTCTCCTGGAACTTCGAGAAGTT///TCTAAACCTACGTGGAGGAATGCCTGATGTCCAGGAAAATCCCCTGAGGTGGGCGCTGGT///AACTTCTCGAAGTTCCAGGAGACGTCGTTGCGGCACACCGGGGACCAGGTGATGAACTTA
A_73_P260821	0.020855	0.00712892	up	1.82953	1.82953	0.87147		LDL receptor related protein 5 [Source:HGNC Symbol;Acc:HGNC:6697] [ENSBTAT00000007756]	ACAAGCTCCCGCACATTTTCGGATTCACGCTGCTGGGGGACTTCATCTACTGGACCGACT
A_73_109499|100336022	0.0246716	0.00887674	up	1.82945	1.82945	0.871412	WFDC18	Bos taurus extracellular proteinase inhibitor (WFDC18), mRNA [NM_001205278]	ACAAATTCGATGCTTGGCATAACAAGGCTTCCATATCCATTCCTTGCTCTTTCCTTTGCC
A_73_P212752,A_73_P271956,A_73_101051,A_73_P087111,A_73_112558|520186	0.00949498	0.00249318	up	1.82893	1.82893	0.870998	CNTRL	centriolin [Source:HGNC Symbol;Acc:HGNC:1858] [ENSBTAT00000061592]	ACATATGGGAATATCGTATACTATTTAAACCAGGGTCTTACATGGCTGAGGGTTTTCTTT///GTAAACTCATTACAGGAGGAACTAGCTGATGTCCAAGACCATTTGAACCTAGCGAAACAG///TAGAACAATCAACTCTACAAACAGAACTTGAGAAAGAAAAACAAGCCCTCAAGAACGCCC///TGAAGAGAAACTACATTTTTCTCGCGTTCACATAATGGATGAGCACTGGCGTGGAGAAGC///TGAAAAGCAGGAGGAGATCAAGGACCTCCAAAGAGTTATTGATAGTCTGGATTCCAAAGA
A_73_P062636	0.00199937	0.000218077	up	1.82679	1.82679	0.869314		Rep: Histone H2B type 1-C/E/G - Mus musculus (Mouse), complete [TC461141]	TTACAACAAGCGTTCGACCATCACATCCAGGGAGATCCAGACCGCCGTTCGCCTGCTGTT
A_73_P363626,A_73_P377066,A_73_P044151|510950	0.00113091	6.80457e-05	up	1.82589	1.82589	0.868597	CEP44	Bos taurus centrosomal protein 44 (CEP44), mRNA [NM_001076833]	CTAAATTATCCTAGAGAGGTGGATTGTGTAGGTTTGGTAAAGGGAGATACAGCAGCCTCT///CTTCTCTAGGACTTTGGCTACTGTACATGCTGTATATTTTAAAGAGTTCTCTATGCAATT///CTGTTAATTACTGTGGTTTGAAAGAGATCTCAGAGGAAACAACAATGCAGAAAATGGAAA
A_73_P069426,A_73_P307411,A_73_P052261|513626	0.00126051	8.56237e-05	up	1.82549	1.82549	0.86828	FANCM	Bos taurus Fanconi anemia complementation group M (FANCM), mRNA [NM_001104976]///Rep: FANCM protein - Bos taurus (Bovine), complete [TC398150]	GTCTTTAGTGGAACAAAGAAAGAATGTTGGTATTCATGTTCCAACAGTGGTGAACAGTAA///GAAGCATTTGCCAGTTCTTTGATTCAGAGGAATGTTTTGATGAGAAAAGATATTCCCAAT///GAACTTGACCCACTGATGATATTGTTTTATCCTTTTAGGTAATTAGGGTGCCATTTTAGA
A_73_105530|615299	0.0169407	0.00544403	up	1.82521	1.82521	0.868059	C19H17orf53	chromosome 17 open reading frame 53 [Source:HGNC Symbol;Acc:HGNC:28460] [ENSBTAT00000005861]	CAAACAGCACAGAACCCAGAGGCAGGGGCGACTCTCGAGAAAGAACTCCCAGAAGCAGAT
A_73_116783	0.00121633	7.82776e-05	up	1.82497	1.82497	0.867876		ankyrin repeat domain 13C [Source:HGNC Symbol;Acc:HGNC:25374] [ENSBTAT00000020574]	CCTTAATGACCCCACTTCCTTCTTATGTAAAACAGCTATGAGTGCTGTGATTTGTTTTTA
A_73_P120566,A_73_110618|617931	0.000609441	6.25058e-06	up	1.82468	1.82468	0.867641	SIVA1	LB013100.CR_O17 GC_BGC-13 Bos taurus cDNA clone IMAGE:8456107 5', mRNA sequence [EH152531]///Bos taurus SIVA1, apoptosis-inducing factor (SIVA1), mRNA [NM_001193178]	GATAACACTGATCATCACTCTGGAGAGATGAGCAGGTGATGTAAATGAGTGAAGCCTAGG///GAGGGTGCCTTTTCTCTTTTGTATTTTGTGCTCCTGACGACTGAAGACAATAAATCCTCT
A_73_106392	0.0240558	0.00857736	up	1.82438	1.82438	0.867406		Rep: Heat shock 70 kDa protein 6 - Sus scrofa (Pig), partial (9%) [TC483013]	GTGTGGCCCTTTAAAATTGCTTTTACCCACATTTAAAGCATTTTGTTACTTGCATGTATG
A_73_118319,A_73_P100771|282122	0.000878626	3.72014e-05	up	1.824	1.824	0.867104	VEGFC	Bos taurus vascular endothelial growth factor C (VEGFC), mRNA [NM_174488]	TGCAAAAGACCTCTTTAAAAGACTGGTTTTCTGCCAATGACCAAAAGCTGAGGTTTTCTC///ATTTTATTTTTTCCCCCAGTGCTGGAGATGACTCTGCAGACGGATTCCATGACATCTGTG
A_73_107978|107131158	0.0370234	0.014875	up	1.82378	1.82378	0.866932	LOC107131158	olfactory receptor family 1 subfamily N member 1 [Source:HGNC Symbol;Acc:HGNC:8221] [ENSBTAT00000053513]	GTGCTCATGGTCCCCTTCATATGCATTGTCATCTCCTACATTCACATTGTATCTGCCGTT
A_73_P048176|514793	0.007868	0.00191669	up	1.82327	1.82327	0.866527	POLA2	Bos taurus DNA polymerase alpha 2, accessory subunit (POLA2), mRNA [NM_001024542]	AGATCAGTAGTTCTTCTGGAACTTCAGACCGGTTCAGCCGAATTCTTAGACACATCCTGA
A_73_100258	0.00652098	0.00146769	up	1.82311	1.82311	0.866405		Rep: Homeobox protein Hox-C6 - Homo sapiens (Human), complete [TC404592]	GCTGTATTTGTGGTCTCTGTATTTATATTTATGTTTAGCACCGTCCGTGTTCCAATCCAA
A_73_111047	0.0237142	0.00841584	up	1.82251	1.82251	0.865927		Rep: Sodium/myo-inositol cotransporter (Na(+)/myo-inositol cotransporter) - Bos taurus (Bovine), complete [TC393953]	AAACCCTGCAAACTTATGTAACTGTTGCATCTCTCAGGCATTGTTTACGCTGTAGATTTT
A_73_109207,A_73_P053881|281638	0.00236125	0.000296459	up	1.82231	1.82231	0.865767	ARRB2	Bos taurus arrestin beta 2 (ARRB2), mRNA [NM_001205277]	CTTCCCCAATCCCCCAGTGGGTGGCAAGCTGTGTTCACACCTCAATTTTTTGGAGGGGGA///ACCTCATTGAATTCGAAACCAACTATGCCACAGACGACGACATCGTGTTTGAGGACTTTG
A_73_P300471	0.00523897	0.00105174	up	1.82217	1.82217	0.865656		Rep: Movement protein - Barley yellow dwarf virus - PAS, partial (18%) [TC418612]	AAAGTGCCTGAAGCATAATTCATTCTTTACCTGTATACTGAAAACCCCGTTGTATTGATT
A_73_101333	0.00331287	0.00051844	up	1.82184	1.82184	0.865399		Rep: MGC80202 protein - Xenopus laevis (African clawed frog), partial (8%) [TC418929]	TGGGGCCCGTGTGCACTTGGCGTCATGTGTGGTCCTGTCTCCAATAAAAAGTCTCGTGGT
A_73_P148206,A_73_P087376,A_73_120667|527520	0.0013989	0.000107276	up	1.82155	1.82155	0.865167	HERC6	Bos taurus hect domain and RLD 6 (HERC6), mRNA [NM_001192644]	CCTGAATATTCTACAATGAAAAAAGTGAAGGAAGCACTTCAAAGAGCCATCAACAGCAAC///AAGCACTTCAAAGAGCCATCAACAGCAACAAAGGATTTATCTCAGCCACAGTCACAGGGA///TTTCTGCTAAGGACCTTGCGGATGTTCAAGTCAAACATATTTTTGCTGGAACATATGCCA
A_73_113292|528378	0.00601767	0.00130403	up	1.82127	1.82127	0.864948	HAUS1	Bos taurus HAUS augmin like complex subunit 1 (HAUS1), mRNA [NM_001038557]	TAGTATTAGAAAAATGTCTGCAAGAGTACCTCAAGAAGGCAGAGTTGCATTTGTGTACGG
A_73_P380256,A_73_117647,A_73_P141421|510209	0.00893218	0.00227384	up	1.82111	1.82111	0.864816	SLC4A7	Bos taurus solute carrier family 4 member 7 (SLC4A7), mRNA [NM_001098926]	CAAACTCATGGATCTGTGTTTCACAAAGAGAGAGCTTAGTTGGCTTGATGATCTCATGCC///TATATGAAGTACAAGTATCTACCAGTCTAGAATGTGAATAATCTTGCTTTTCAAATCTGT///CCGCTCAGGACACTCTTTCTTCCACCGGTTTTATTTATTATAGACATCTGTTTACAGAAA
A_73_P041651|774023	0.00126146	8.5771e-05	up	1.82087	1.82087	0.864626	INSL6	Bos taurus insulin like 6 (INSL6), mRNA [NM_001077521]	AAGCATCAGCAGTTGTGACTGAGATATACTAACCATCATGAGACTTACACTAACTTAATA
A_73_P040246,A_73_P378876,A_73_P395966|789410	0.00143876	0.000113618	up	1.82007	1.82007	0.863996	XRCC2	Bos taurus X-ray repair cross complementing 2 (XRCC2), mRNA [NM_001102354]	GATCATATTACTGTCATTCACACCCACTTGTGTGCCCTCAATAAATGTTATTTTGCTATT///GCCCTTCTAGGTGCAGTATTTGCTCTTCAGCCATATTATGGAATTTAAAATGATGGCATT///CCTTAGACTGTTCTGTTCCTGGGTTGTTGAAGATTATTCAGAGTGATAACAATAATAGTT
A_73_P257571,A_73_P287016,A_73_113906|510842	0.00150914	0.000123598	up	1.81981	1.81981	0.863788	LPCAT4	Bos taurus lysophosphatidylcholine acyltransferase 4 (LPCAT4), mRNA [NM_001077901]	TATTCTTTCCTGAGGGCACCTGTTCCAACAAGAAGGCTTTGCTGAAATTCAAACCAGGAG///TAGCTACTTCCAGCAGGATGCCGATGGTTTGGTGGACTTCCGAGACGTGGCCCTTGCATT///CACCCCCTGGGCCTCAAGCCCACCTCTGTCCTGCTTGACTTTTCATTATTGTCGATGATT
A_73_P377891,A_73_108853,A_73_P332266,A_73_P296781|507365	0.0015336	0.000127002	up	1.81963	1.81963	0.863646	NET1	Bos taurus neuroepithelial cell transforming 1 (NET1), mRNA [NM_001034296]	GATGAACTTTGCATGCCAAAATTTGAAATTGGAACATTGGCATCTAAGATCTACTTGGAA///TTCCAGTAAACGTGGACTGTTATGTGAACTGTATCTGGCCAGTGGAAATGAAAACTGAAA///GTTCTTGGAAAACAAACCAAACTTAATCGGTTTTCCATTTTGCCAACTGGAATGCTTTTT///TTGGATGCTTACATACCTCTGCATGAAGATTTGTTGGAGAGAATAGGAGAAGCCACCAAG
A_73_P116366	0.00855609	0.00214644	up	1.81962	1.81962	0.863636		LB02713.CR_P13 GC_BGC-27 Bos taurus cDNA clone IMAGE:8310783, mRNA sequence [DV889511]	GTTTTCTGTTTTTGCTTTTATAGGATGCTAAGCAGGAGCATTTGTGTGTGTGTGAAAACT
A_73_P069371,A_73_P126991|510259	0.0066403	0.00150541	up	1.81899	1.81899	0.863135	GEMIN2	gem nuclear organelle associated protein 2 [Source:HGNC Symbol;Acc:HGNC:10884] [ENSBTAT00000027878]	ATTTATTAATCTGCTTGGTTAGCAGCAGGTATTTTGACCAGCGTGACTTGGCTGATGAGC///TGTCTTGAAAAACCTTTATTACCGGAGGCTCATTCACTGATTCGGCAGCTTGCAAGAAGG
A_73_P486964,A_73_P490833,A_73_P206517,A_73_P277526,A_73_P275056,A_73_P040296,A_73_P104991|615847	0.000956339	4.66232e-05	up	1.81859	1.81859	0.862817	SKA2	Bos taurus spindle and kinetochore associated complex subunit 2 (SKA2), mRNA [NM_001038579]///Rep: Spindle and kinetochore-associated protein 2 - Bos taurus (Bovine), complete [TC409311]	GTTAACATTGATGACTATTGGTCGGGAGATGAAAAGGAGATTTGGCTTGGGTGACTGGTT///ACATTGATGACTATTGGTCGGGAGATGACAAAGGAGATTTGTCTTGGGTGACTGGATAGT///CTTGATACAAGAACTGCAAAAGGAAACAGACCTGGAGTTGTTACCACTGACTGAAGAAGA///GTCTCCCACAATACCTAACTTAGTAGAAAGCTGGCTTTTCTGTGACAGCTTCACTTTTAT///ATTCTGATCGCAGATGTGGTCACCTTATTGGTGAGACTGCTAATATGTGACTTAACTGTC///GCTGTTTCTGATTGTCCCTGTCACATTTCAGGGACCTGAAATATACCTTTGTTCTCCTCT///CCCTGTTGTCCTGTACTACTG…
A_73_101964,A_73_P162517,A_73_P501925|532080	0.00104515	5.81918e-05	up	1.81841	1.81841	0.86268	EXOSC8	Bos taurus exosome component 8 (EXOSC8), mRNA [NM_001079606]///Hw_liver_70_050825_H04 Bos taurus CF-24-HW liver cDNA library Bos taurus cDNA, mRNA sequence [DV790894]	AACTGATGGATGAAGTATTTAAGAGTATGAAACCCAAATGAGCAACCACGTTTTCAAAAC///CTGTATAACATATGGAACTCTGCTCAGTATTAATGGTGGAAGCCTGGCTGGGAAGGGAAT///GCCAGTGTTCTGTTTTGGTAAAATTTTCTAAAGGTTTTTGTGAGGACTTATCTATCCACA
A_73_P034731|522854	0.00367884	0.000613933	up	1.81835	1.81835	0.862631	BAG5	Bos taurus BCL2 associated athanogene 5 (BAG5), mRNA [NM_001040544]	ATTGAAGTGCAGACCCTCATCACCTACATTGACTTGAAGGAAGCCCTGGAGAAAAGAAAG
A_73_P093506|535643	0.00100015	5.12922e-05	up	1.81818	1.81818	0.862496	MAST2	microtubule associated serine/threonine kinase 2 [Source:HGNC Symbol;Acc:HGNC:19035] [ENSBTAT00000033290]	GGCCCTCAGGAGCATCAGGACTTGGCATTGTTACCTGATGAGCTTTTAAAGCAAACATAG
A_73_P064936|512652	0.0479919	0.0205001	up	1.81722	1.81722	0.861731	SSH2	slingshot protein phosphatase 2 [Source:HGNC Symbol;Acc:HGNC:30580] [ENSBTAT00000014625]	AGACTGAGAAAAGCAAATGATAAAAAACGGACAACCAACCCCTTCTATAATACCATGTGA
A_73_P451571,A_73_106673|504939	0.00641438	0.00142832	up	1.81514	1.81514	0.860083	GADD45G	Bos taurus growth arrest and DNA damage inducible gamma (GADD45G), mRNA [NM_001045901]	AGACCTGCACTGTATCCTCATTTCGAACCCCAATGAGGACGCATGGAAGGACCCCGCCTT///TACGGGCACTGCTTCATTTTCTAAAGGACTATGCTGCTGCAGCTTTGAGTTTTACAATAA
A_73_110483	0.0306267	0.0117152	up	1.81513	1.81513	0.860077		semaphorin 5A [Source:HGNC Symbol;Acc:HGNC:10736] [ENSBTAT00000006610]	GAGTTCAACTTGTTCCACATGATTGCCGTGGGGCTCAGCAGCTCCATCCTAGGCTGCCTT
A_73_P087901,A_73_P332647,A_73_113526|540143	0.00481435	0.000924356	up	1.8146	1.8146	0.859655	GK2	Bos taurus glycerol kinase 2 (GK2), mRNA [NM_001256551]	AGTGAAATTCGTTATTCTACATGGAAGAAAGCTGTGATGAAGTCAATGGGTTGGGTTACA///CTTATCTGGAGTCTGACGGGAGGAGTTGATGGAGGTATCCATTGCACAGATGTAACAAAT///TTACAGGTCAGCCTTCTGAAAGTAGTGAAGCTAACAACTTCTCTAGTCTGCCCTTGGGTT
A_73_P321001,A_73_113241|510008	0.0019216	0.000201009	up	1.81456	1.81456	0.859618	FHL2	Bos taurus four and a half LIM domains 2 (FHL2), mRNA [NM_001046046]	TTCATCCCGAAGGACAGCGAGAACTTCTGCGTGCCCTGCTATGAGAGGCAGTATGCTCTG///CATCAGCGGACTGGGCGGCACCAAGTACATCTCCTTCGAGGAGCGGCAGTGGCATAACGA
A_73_P288196	0.0439936	0.0184557	up	1.81371	1.81371	0.858945		PREDICTED: Bos taurus leucine-rich repeats and immunoglobulin-like domains 1 (LRIG1), partial mRNA [XM_582085]	AGGTTTCAGTTCTTTCTCTAAGAGGTGGAATATAGGTTGTTTATCCACTACAAGCAATTG
A_73_117536|512069	0.0014561	0.000116095	up	1.81333	1.81333	0.85864	FAM207A	Bos taurus family with sequence similarity 207 member A (FAM207A), mRNA [NM_001046108]	TTCTTCCGCGACACGGCTGCTGTGCTTGGCAAAGGTGGGAGACAGGCAGTTGACACGGGA
A_73_P249536,A_73_119591|614156	0.023459	0.0082976	up	1.81293	1.81293	0.858321	INSM2	Bos taurus insulinoma-associated 2 (INSM2), mRNA [NM_001144080]	AAGTTGAGCTTCGCCGATGAAGTCACCACGTCCCCTGTTCTGGGCCTGAAGATCAAGGAG///GGGGCTGACCCGGCACATCAATAAGTGCCACCCCTCAGAAAGTCGGCAGGTACTGCTGCT
A_73_P034801,A_73_P303921|534692	0.000468303	3.45123e-07	up	1.81181	1.81181	0.857432	SSX2IP	Bos taurus SSX family member 2 interacting protein (SSX2IP), mRNA [NM_001076036]	GCATTGGAAGTTGAGCCTTTCCTTGAATGTATACTGTAGATTTTTAACAAAGCAAGTTCT///CTACTGAAAAATGAGAAAGATGAGGTGCAGAAATTTACAAAATATCATTGCAAGTCGAGC
A_73_P031846,A_73_P413096|504991	0.00468045	0.00088885	up	1.81147	1.81147	0.857158	ANKRD22	Bos taurus ankyrin repeat domain 22 (ANKRD22), mRNA [NM_001081579]	GCATCTCGAGATGTTTTGCTATCAGTTTACAAATTAGAGCCATCTTGATTTCAAACATGA///TATGGCTGCACTGCACTACACTATGCCTGTGAAATGAAAAACCAAACGCTCATTCCTCTG
A_73_P365251,A_73_P084460,A_73_114563|540236	0.00148249	0.000120344	up	1.8113	1.8113	0.857027	TUBB4A	Bos taurus tubulin beta 4A class IVa (TUBB4A), mRNA [NM_001034697]	CAGCTGGAGAGAATCAACGTATACTACAATGAGGCCACTGGGAGGAAATTACGTGCCCAA///TACAATGAGGCCACTGGAGGAAATTACGTGCCCAGAGCTGTCCTGGTGGACCTTGAGCCA///TGCTGCTGGGGAGAAAGAAGCCCTGGAGCATGTGGACAAGAGAGGCTGTTCCCTGACCTT
A_73_P058991,A_73_P366221|525496	0.000489803	7.93205e-07	up	1.81103	1.81103	0.856807	NUDT1	nudix hydrolase 1 [Source:HGNC Symbol;Acc:HGNC:8048] [ENSBTAT00000003218]	GCCTCGTCTGTCTGGAGCACAACTGGATGGAAAAGCAAATAAAGCTTTTTCGGCAACTCC///TACTGCTTCAGAGGAAGAAGTTCCGCGGCTACTTCAGGTTTCCAGGGGCAGGACACCATC
A_73_P039936|327705	0.0150409	0.0046532	up	1.81094	1.81094	0.85674	ASAP1	Bos taurus ArfGAP with SH3 domain, ankyrin repeat and PH domain 1 (ASAP1), mRNA [NM_175821]	ATTACCTTAGCTCTGCTCACGTGATCACTGAACCAATAAACCTTGCATGACAAACCTGCG
A_73_P149336,A_73_119835,A_73_P398796|507204	0.000904753	3.97944e-05	up	1.80995	1.80995	0.85595	NLK	Bos taurus nemo like kinase (NLK), mRNA [NM_001193253]	GCACACTTACTGGTCACTTTGTACAATGTAGATTTGAAGTACAGTGGTGAAAACATTAAA///CGACTACGATACCACACGTGTATGTGTAAATGTTGCTTTTCCACCTCTACTGGAAGAGTT///GAGAACTAGCTTGCACATTTTAGGTCTGTGAAATTTTGTGAGACTTTTCCTGCACTGGAC
A_73_P035571,A_73_P401691,A_73_P495363|781917	0.00122741	7.97439e-05	up	1.80983	1.80983	0.855855	DDX21	Bos taurus DExD-box helicase 21 (DDX21), mRNA [NM_001083527]	GGAGGATGGTGATACATTTGATAGGAGATAGTATTTAGATTAGCCATTGTTATGTGCATT///GATCAGGAGGTGGCAACAAAAGTAACAGATTTCAAAACAAAGGCCAGAAACGGAGTTTTA///CTTGAAGTAGAGGATTTATTTGGCAAAAACAGAACTATTTTCAGCAATGTGGAACTGAAC
A_73_P046756,A_73_P255821,A_73_103018,A_73_P103516|519302	0.00247522	0.000319718	up	1.80974	1.80974	0.855783	MRPS9	Bos taurus mitochondrial ribosomal protein S9 (MRPS9), mRNA [NM_001035332]///28S ribosomal protein S9, mitochondrial [Source:UniProtKB/Swiss-Prot;Acc:Q58DQ5] [ENSBTAT00000008093]///Rep: 28S ribosomal protein S9, mitochondrial precursor - Bos taurus (Bovine), partial (78%) [TC400145]	TGTTTATGGCCATGGCAGTGGGAAGATAGAAATAAATGGGGTCGACTACCTGCTCTACTT///TTTGTTTGAGAAGCGAGCCCGGCCCATAATGAAGCATCCCGAAGAGATTTTTCCAAAACA///TCCTCCGCGTGCTGTCGATTTTCCAGACAGCTACACAGTTTTCACAATTGAGGGATGAGA///CTAAAGGAAATACACTTGATGATACATCCCGATCAACAAGGCTTATGATTTCCTGGCAAA
A_73_101954|533555	0.00706619	0.00164607	up	1.80869	1.80869	0.854947	POC5	Bos taurus POC5 centriolar protein (POC5), mRNA [NM_001102158]	TCTTGGAACCAGATCAACTCACACCCAGTCTCTCACAAGCATTCAGTCCATAAAAGTGGT
A_73_P494408	0.000916427	4.08978e-05	up	1.80861	1.80861	0.85488			GTCACCAAGGCAGTTCATGCATATTTAGGTTACCTTCACCTTTTCTATAATTTGTAACAA
A_73_108302	0.0101928	0.00275807	up	1.80857	1.80857	0.854847		Rep: MGC152369 protein - Bos taurus (Bovine), partial (21%) [TC440832]	CCTCTGGGACATGGAGAAGGTATCCCCTCACCTTCACTAGTCCACCATCACTCACTGAAA
A_73_P133691,A_73_P406096|525093	0.00537718	0.00109545	up	1.8079	1.8079	0.854312	MRE11	Bos taurus MRE11 homolog, double strand break repair nuclease (MRE11), mRNA [NM_001192605]	TTTCTAGACATCCTGGATTTCCTGTACGTAAAACAGTTTATATGAACAGTGCCTAAGCTC///AACTTTGGTTTTAGTAAGTTTCCATGGGTGAACTACCAAGATGGCAATCTCAACATTTCA
A_73_113875,A_73_P331586|511969	0.000964329	4.76366e-05	up	1.80776	1.80776	0.854203	IMPDH2	Bos taurus inosine monophosphate dehydrogenase 2 (IMPDH2), mRNA [NM_001034416]	TGGAAGGTGGTGTCCACAGCCTCCATTCGTATGAGAAGCGTCTTTTCTGAAAAGCAATTA///TTCGTATGAGAAGCGTCTTTTCTGAAAAGCAATTATACAGCACATCCCGTCGATTTTTCA
A_73_104268|504604	0.0151001	0.00468335	up	1.80754	1.80754	0.85403	SOX14	Bos taurus SRY-box 14 (SOX14), mRNA [NM_001163781]	CCCGTCGCCTACATCCTCTTCCCGGGCATGACCAAGACTGGCATAGACCCCTATTCGTCA
A_73_109133	0.00411223	0.000732449	up	1.80735	1.80735	0.853874		4078787 BARC 9BOV Bos taurus cDNA clone 9BOV13_L12 5', mRNA sequence [CK963957]	TGAGCTTTGTTGGGGTCCAGGTCTGAAATGGTACCCATCACTTACTGTCTTTGTAGACTT
A_73_P034446|617724	0.0185818	0.00613123	up	1.8073	1.8073	0.853833	C14H8orf46	Bos taurus chromosome 14 open reading frame, human C8orf46 (C14H8orf46), mRNA [NM_001076475]	CCTCTATTTGTATGTGGCAGCTGGAGATATATGTAGGATGGAGCTTATTTATTTTTCATT
A_73_103652	0.00956686	0.00251822	up	1.80544	1.80544	0.852348		1398198 MARC 7BOV Bos taurus cDNA 5', mRNA sequence [DN546756]	CTCACCTAGCCTCTTCCACTTTTGACACTCTGCACCAGAGGAGTACATTTGTTACAATGA
A_73_116955,A_73_P082401|539492	0.0079147	0.0019347	up	1.80519	1.80519	0.852148	SIX2	Bos taurus SIX homeobox 2 (SIX2), mRNA [NM_001205678]	CTCTTGCGCCTCGCAAGCTGTACCCCTCAGTGTTTCTCCTTATGCCTGACCATCTATGTA///AGAACAGCGAGAACTCCAACTCTAACAGCCACAACCCGCTGGCGGCGTCGCTGAACGGCA
A_73_P039856,A_73_P090311|515215	0.00146842	0.000117912	up	1.80475	1.80475	0.851799	DNAJC22	Bos taurus DnaJ heat shock protein family (Hsp40) member C22 (DNAJC22), mRNA [NM_001075701]	TATGAGTTTGTTCACAGTTTTCAGGATGAGAAGCGTCAGCTGGCTCTCCAGGTTTTTGGT///TAAGGTTTTTGGTCTCTCAGAGGGGGCAACAAATGAAGAAATACATGGCAGATACCGGGA
A_73_P094801,A_73_P478048|535735	0.00455357	0.000852278	up	1.80462	1.80462	0.851696	C2H2orf69	chromosome 2 open reading frame 69 [Source:HGNC Symbol;Acc:HGNC:26799] [ENSBTAT00000053405]	GGATTACTTATCCGGAAGTCTTGAAAGAATTTGCACAAACAGGGATAATTGTTCACACCC///TGGTTGCCAGGGAGAAAAAGAGAGGACCTGTGAAAAATCTGATGAGTCTGCTGTGAGTTT
A_73_119666,A_73_P251221|516874	0.000699123	1.77827e-05	up	1.80448	1.80448	0.851579	TFB2M	Bos taurus transcription factor B2, mitochondrial (TFB2M), mRNA [NM_001038127]	ATTTTTATATCCTCCTGGGGGAGCAGAAGAGTACAGAAATGTGGAAAGTAAACTGATTTA///AAACCTGTGTTTTGTTCAGTTGACTCCTCATAGAAATTTATTTACAGGAACCTTAACACC
A_73_120614	0.0118823	0.003416	up	1.80442	1.80442	0.851531		Rep: Oxidoreductase, 2-nitropropane dioxygenase family - Pseudomonas syringae pv. tomato, partial (6%) [TC418605]	GCTCCGCTGTTTTTAAATGTGAACTTGTGCGCAAATGTGCAGATTCAATGTTCTTGTTAC
A_73_P322221,A_73_P251086,A_73_116276|505007	0.00124013	8.20746e-05	up	1.8035	1.8035	0.850798	MOB3A	Bos taurus MOB kinase activator 3A (MOB3A), mRNA [NM_001034229]	AAGAAGATCCTGTCGCGGCTCTTCCGCGTGTTCGTGCATGTGTACATCCACCACTTCGAC///TTTATGAAACTGGCCAATCGAATGTAGCTCCTTTTAGATGCAGAACCACAACCGAACGCC///TCCCCTTGCCCTCTAGAAAAATGTCCCCTTTTTGCCATGAATAACAGGGTGACTCTCCCA
A_73_P307376	0.00855609	0.00214782	up	1.80328	1.80328	0.85062		PREDICTED: Bos taurus ring finger and FYVE-like domain containing 1, transcript variant 4 (RFFL), mRNA [XM_867129]	AGCAATAACTTCAGGGCAGAAGCTGGCTGTTTCCCTGCTTAAAACTTGTTTTCTCTGCTG
A_73_113799|533298	0.00126541	8.67427e-05	up	1.80298	1.80298	0.850386	LNPK	Bos taurus lunapark, ER junction formation factor (LNPK), mRNA [NM_001075989]	CTCTTATTTTGCAGCTGGGCCAGAGGTACCTGATGTATATAATTAGCTTATGTTTACATA
A_73_P217317|618745	0.00145404	0.00011566	up	1.80158	1.80158	0.849263	CDC42EP5	CDC42 effector protein 5 [Source:HGNC Symbol;Acc:HGNC:17408] [ENSBTAT00000064815]	CATTCCCTGCGCTCTTACCGCCCAGCGCCCCACTTCTTTCTACATAAACCGACAAGGTCT
A_73_116099,A_73_110493,A_73_P104371,A_73_P169882,A_73_P334701|352960	0.00157483	0.000134433	up	1.80145	1.80145	0.849159	TRIB2	Bos taurus tribbles pseudokinase 2 (TRIB2), mRNA [NM_178317]	TGACATGCATGGTGGGAATCTATGGCCTCTGGTGCTTTGTCCTGTATTCGGTTTAATGTT///AGTTCTTCCAGGGAACACGTATCGCCTGGCTTGGTAGCAAGAGGGACACGGACACTCACA///CCCTCAGTTGAGACAGCAGGAAGGAAAATAAGCTGAAAGCTAGGATGATATTAAAAAACA///GGTTTGTGGCAGGAAGCTCTTAGAAGTCAAACTTCCAGAAGCATCATTGCTATCATAGTT///TAGCAAGATATGGGAGATCGCGGAACAAAACCCAGGATTTCGAGGAGTTGTCGTCTATAA
A_73_P245146,A_73_P506508,A_73_P044026|614427	0.00235948	0.000296073	up	1.80143	1.80143	0.849145	METTL5	Bos taurus methyltransferase like 5 (METTL5), mRNA [NM_001099135]	AATAGGAATGTAGAAGAGTTTGAGTTAACAAATGTAGACGTGGTTCAATGTGATGTATGC///CAGGGTTGTGTGTTGGATTTGACATAGATGAAGATGCATTGGAAATATTTAATAGGAATG///GTGGATCTAATTCGGTTTTCTTTTTAACAGCCTCCAAAGACAAAAGCAGCTTAAAATCTA
A_73_112294	0.00630871	0.00139684	up	1.80053	1.80053	0.848422		Rep: Os02g0653300 protein - Oryza sativa subsp. japonica (Rice), partial (19%) [TC450981]	GGTCCATGTTGTATAGCATTTGTCAGTATTTTTCTTCCTGGAAAATTTAAATGCACCAAG
A_73_101351|511167	0.00211103	0.00023939	up	1.79989	1.79989	0.847912	NRM	Bos taurus nurim (nuclear envelope membrane protein) (NRM), mRNA [NM_001037596]	CTTGTCTTCGACTATGCAGAGCTCATGGGCCTGAAACAGGTGTACTACCATGTGCTGGGG
A_73_107691,A_73_P429777,A_73_P050091|282469	0.0463843	0.0196738	up	1.79864	1.79864	0.846903	SEC14L2	Bos taurus SEC14 like lipid binding 2 (SEC14L2), mRNA [NM_177943]	TCACCGTGGAGGTCCTGCTTCCAGACAAAGCCTTAGAAGAGAAGATGCAACAGTTGGGGG///AGGACATTGACAACATCATGAGCTGGCAGCCTCCAGAGGTGGTGCAGCAGTACCTGTCAG///TATGTCCTGCGGTTTGACAACACCTACAGTTTCATTCACGCAAAGAAGGTCAGTTTCACC
A_73_106260|533907	0.0473623	0.0201753	up	1.798	1.798	0.84639	SLC41A1	Bos taurus solute carrier family 41 member 1 (SLC41A1), mRNA [NM_001206036]	AGACACAGATGTCGGGGACTAGCCCGGTCACTCAACCTTCTGTCCACCTCTCTGCACTTT
A_73_P067716	0.00119883	7.54175e-05	up	1.79779	1.79779	0.846223		GB	TTGTCCAAGGCCATGGGAATCATGAACTCCTTCGTCAACGACATTTTCGTGTGTATCACT
A_73_P494273	0.0106114	0.00291817	up	1.79773	1.79773	0.846177			TGGGGCTGGTTTCTGTGAAACGAATGTTTGTTTAGTAAAGAACAGAAAAACTCCAAAAAA
A_73_100971|511080	0.00671401	0.00152902	up	1.79709	1.79709	0.845665	PRIMPOL	Bos taurus primase and DNA directed polymerase (PRIMPOL), mRNA [NM_001075488]	ACAAGAGTAGCTAATTATGGACACTGACATAACTAGGCTGTAATCTACATGAAGGCAGAT
A_73_106179	0.00341468	0.000541971	up	1.79675	1.79675	0.845386			GGTTTGCCCAAGGGTTTAGATGAGGAGCACTTTAAAACAAACTGGTTTGGTGTGTTTAAG
A_73_104763,A_73_P403986,A_73_110220|512877	0.00171461	0.000158664	up	1.79624	1.79624	0.844983	CENPI	Bos taurus centromere protein I (CENPI), mRNA [NM_001102494]	ATGGTTGGTTGCCTGTGGACATCCAGACCCTTCCAGAAAGGATTATATATTGACCCTGAA///TATCTTGCTGAAAATTTACCACAGAATTTTGCTTCAGTGCTACAGAAAAATTCTCCACCT///AAATGAAAATCCATTAACTTTATGATTTATGCTCTCTGACAGCATTGGGTCAAAGGGGCT
A_73_106347,A_73_P191942,A_73_P284211|534380	0.00115539	7.06182e-05	up	1.79623	1.79623	0.84497	FAR2	Bos taurus fatty acyl-CoA reductase 2 (FAR2), mRNA [NM_001076022]	CTTTCCAGGGCAGAAAACCCAGCTCTGAAAGAAAGCAGCTGGTTATCTTCAGTTTGAGAT///AAGAATCATGTCCATGATTGCAGCTTTCTATGGTGGCAAGTCCATTCTCATTACTGGGGC///TAGAGGAAGGCCCTAAGCTAAAATCACGTAAAAACCCATTTTTCCTGATATTTGCCACTG
A_73_P325016	0.0316198	0.0121879	up	1.79535	1.79535	0.844269		host cell factor C1 [Source:HGNC Symbol;Acc:HGNC:4839] [ENSBTAT00000015793]	ACAGTGTGAATATCGCCAGTTCCAGTCCCATCACGACAACAGTGTCCTCCACGCTGACGC
A_73_P052101|541013	0.00226036	0.000274256	up	1.79516	1.79516	0.844113	MAGOHB	Bos taurus mago homolog B, exon junction complex core component (MAGOHB), mRNA [NM_001076252]	CCCATACTTCACAATACACATGTTTTGTATATCTGTGGGAAATAAATGAGTTCTCATCTC
A_73_114180|515071	0.000974645	4.90364e-05	up	1.79481	1.79481	0.843834	PHACTR3	Bos taurus phosphatase and actin regulator 3 (PHACTR3), mRNA [NM_001102019]	GCTGTGACCAAGGGATGTGTACGCAGTGTCTTCAGTACCATGTGGAAAAGACCTTTTTAT
A_73_P042681,A_73_P292536|519463	0.00208454	0.000235181	up	1.79386	1.79386	0.84307	NEDD1	Bos taurus neural precursor cell expressed, developmentally down-regulated 1 (NEDD1), mRNA [NM_001035333]	GGAAAGCCAGCAGAATCTTTATTTTATGAAAGCTTTAGCTATACACTAAGTGCCCTTTTT///TAACTTTCTTTAATTCTTTTTTGTGCTGTGTGTAATATTTTTATATTACTGACCCACTAT
A_73_P030851|515866	0.00388175	0.000669216	up	1.79286	1.79286	0.842263	GOLT1B	Bos taurus golgi transport 1B (GOLT1B), mRNA [NM_001046215]	GCAAAAATATTTCCAGTTGCACTGTGTCTCTGAAAATGATGCATGAGTTAGATTGGATTA
A_73_106850|536706	0.00573068	0.00120585	up	1.79275	1.79275	0.842176	EVI5	ecotropic viral integration site 5 [Source:HGNC Symbol;Acc:HGNC:3501] [ENSBTAT00000040289]	TATAGATAATTCCTTACAGGAAAGTGGCATTGGTTTCCCCTTGCACAGAAAATCTGGTCC
A_73_P485318	0.0365408	0.0146158	up	1.79264	1.79264	0.842084		GB	TTTTTGTCTATGTGTTTCCCAACAGTCAGCCCCTTTGTGCTTATTTGCAGTGATACTCGT
A_73_P065141|100140050	0.00123333	8.08734e-05	up	1.79216	1.79216	0.841703	ITGAE	integrin subunit alpha E [Source:HGNC Symbol;Acc:HGNC:6147] [ENSBTAT00000020307]	CTGTGCATTGTGCAGAAAAGAAACCTGGGAAACATTTGGTTGTAAATAAAGGTAAACTAT
A_73_113497,A_73_P458381|505315	0.000959522	4.69609e-05	up	1.79157	1.79157	0.841227	AMDHD1	Bos taurus amidohydrolase domain containing 1 (AMDHD1), mRNA [NM_001098872]	AGAGCTTCATGGCAGAGTTCAAGACTTGTCATTTTATACACAAGTACAGGGACCTTCTTG///CATTTGAGGAAAGAATTGACTGTTCTGGGAAATGCATCTTGCCAGGTTTGGTGGATGCAC
A_73_120502	0.0107244	0.00296395	up	1.78995	1.78995	0.839923		702043 MARC 6BOV Bos taurus cDNA 5', mRNA sequence [CB447990]	ACTCAGAGGAAAAGGTATGCATGCAGCGATCTTCATAGTATGGTGCAGTGGCCAGATTTT
A_73_P031251,A_73_113366|525428	0.000809336	2.89532e-05	up	1.78973	1.78973	0.839742	E2F4	Bos taurus E2F transcription factor 4 (E2F4), mRNA [NM_001075873]	ACAAAAGGAAATTGTAATATTTGTACAGTGTCCAAGTGAATAAAGATCGTGCCTAAGGCT///AGGGCCTCAATGGGCAGAAGAAGTACCAGATTCACTTGAAGAGTGTAAGCGGCCCCATTG
A_73_105330	0.0291577	0.01099	up	1.78874	1.78874	0.838946		GB	TTTGATGGTACCAAGGGTCCTGCTAAAGTTGTCCAGAAAAAGGTGGAAGAGGAAGAGGAT
A_73_P051966,A_73_P413311|517535	0.00204208	0.000226537	up	1.78845	1.78845	0.838712	HSPA9	Bos taurus heat shock protein family A (Hsp70) member 9 (HSPA9), mRNA [NM_001034524]	GAAACGGGCAAACTTCAGTCTTCTACTGTGTTTTTGCAGTATTCTATATATAATTTCCTG///AAAGCCATGCAAGATGCAGAAGTCAGCAAGAGTGACATAGGAGAAGTGATTCTGGTTGGT
A_73_P128006	0.00226203	0.000274918	up	1.78844	1.78844	0.838705		Rep: Regulator of G-protein signaling 20 (RGS20) (Regulator of Gz-selective protein signaling 1) (Gz-selective GTPase-activating protein) (G(z)GAP). - Canis familiaris, partial (6%) [TC422871]	GTTTTTGCTGCTGGGAGCTAAAGCATGTCTTTTTCAAAGGCGAGGCGTTCTCTTTCCTTT
A_73_120513	0.000629314	9.14829e-06	up	1.78834	1.78834	0.838619		CR551194 Normalized and Subtracted bovine embryonic and extraembryonic tissues (bcaz [CR551194]	GGACTCTAAAGTTGTGCAGTCTCTTGTCTTTTTATAGCTGATTTCTCAACTTTTCTTACG
A_73_104162,A_73_P075511|617229	0.00217638	0.000253618	up	1.78789	1.78789	0.838254	DNHD1	dynein heavy chain domain 1 [Source:HGNC Symbol;Acc:HGNC:26532] [ENSBTAT00000012193]///dynein heavy chain domain 1 [Source:HGNC Symbol;Acc:HGNC:26532] [ENSBTAT00000019733]	GTCATTCCAGTATGAGAAAAGCCAGGCCTCAGAGTTCCTGCTCAGCAAGCGGCATGCCAT///AGTTCCAGAGATGGGGCTGCTGCTGATTGGACTACAGCTTCACAATGCCAAGTGGGACCC
A_73_P061476,A_73_107766|513662	0.00145634	0.000116226	up	1.78785	1.78785	0.838227	C29H11orf84	Bos taurus chromosome 29 open reading frame, human C11orf84 (C29H11orf84), mRNA [NM_001205765]	AGAAAAGAGGCAGACCTATGACCAAAACCCTGGACCTAGACCCAGACCCTGACCCAGACC///CGACTGGTCACTCACTGTCCTGTTCACCTCTTTTCCTGTTGTATATATCTCCTTTGTTGA
A_73_P079731,A_73_P380281,A_73_P377646,A_73_114306|519882	0.000969252	4.81015e-05	up	1.7878	1.7878	0.838183	SPRED1	Bos taurus sprouty related EVH1 domain containing 1 (SPRED1), mRNA [NM_001192516]	TTTCATTGTTCCATGTATGTGCTGCTACGTCCCTTTGAGAATGTGCCATCGTTGTGGTGA///ATACTTCCAGTTCTCTAGTGAAAGATCATCTTTTCCATCAAGATACCGTGGTTACCAGTG///CTAGAAGGCTAACTCATAATGTTACCTGAATCCCTTATGTGGAAATTTTCTCTTGAGTAA///GTGCATTAATATTTTCAATTTGTTTAACCACTTTGCTGCTAAGATCTTTCCGTCCCATCC
A_73_121449	0.00133168	9.70416e-05	up	1.78769	1.78769	0.8381		Rep: Predicted protein - Aspergillus oryzae, partial (6%) [TC408820]	TGTGGCCAGAAATTGGCCCGAGTAGATGGTTCATGAAGGCCTTTGTACATTTGCATGTTT
A_73_100646|525408	0.00584852	0.00124484	up	1.78754	1.78754	0.837979	NFKBIB	Bos taurus NFKB inhibitor beta (NFKBIB), mRNA [NM_001075872]	CTCCCACCCCAGCGTCAAAACCGCTCCCTGACGACCCCATCTGACTTAACTGTTAATAGT
A_73_113586,A_73_P046436,A_73_P322726|540367	0.0136714	0.00409425	up	1.7869	1.7869	0.837463	PCED1B	Bos taurus PC-esterase domain containing 1B (PCED1B), mRNA [NM_001101207]	GCTGAGTGAAAGAAAAGAGCTAGGCGGTGCAGACGTCATGGTCCATCTACTGGCCTCCGA///GCATCATTCCTGCCTTCCCGCTGCTTATTCTCTGTCTTTTTGTAAATATACAATTGAAAT///AAATCACCAGTTACTTTAATGACCTTCCGCAGACCCGCTGAGTGAAAGAAAAGAGCTAGG
A_73_P052336|781411	0.0457539	0.0193317	up	1.78629	1.78629	0.836967	SLC24A5	Bos taurus solute carrier family 24 member 5 (SLC24A5), mRNA [NM_001128509]	CTGTTACTGTACTTGGGGCTTACAACATTATCAGTTCTATATGAACTTGGAATTATTGGA
A_73_P097981	0.0195009	0.0065258	up	1.78607	1.78607	0.836785		Rep: UPF0298 protein ABC2380 - Bacillus clausii (strain KSM-K16), partial (18%) [TC479473]	ATGATTGACATAATCCCTGAGTGGACGCTGAGGTTGTTTCCAGGCTTTGGTGCTATAATC
A_73_P058396|100140537	0.00528258	0.00106311	up	1.78587	1.78587	0.836631	POLR3E	RNA polymerase III subunit E [Source:HGNC Symbol;Acc:HGNC:30347] [ENSBTAT00000045908]	CCGGCAGGATGATGAAAATCATGGTCTAATATTTTACTTTCAAACTTAATGCCAACAAGA
A_73_109861,A_73_P118026|280830	0.0343487	0.0135157	up	1.78558	1.78558	0.836395	IVL	Bos taurus involucrin (IVL), mRNA [NM_001105320]	CAGGTCCAAGAGACCCACCCAGTCCTGCCACTGAAGGAAAAAGCCTTGCCCTCTGAAGAA///CAAGAATCACAGGTGCCAGAAGAGCATGTGAAGCAGCAGCAGCAAGAGTCACAGGTGCCA
A_73_102007,A_73_P041006,A_73_P386731|514693	0.000955479	4.6402e-05	up	1.78536	1.78536	0.836218	AGK	Bos taurus acylglycerol kinase (AGK), mRNA [NM_001098969]	TACAGATGCTACACTTGCCATTGTGAAAGGAGAGACGGTTCCACTTGATGTCTTACAGAT///CCTTCGCAGTTTTAAGTTGACAGCTAAAATTTTTCATGGGAAGTTAGTTGCAAAAGTACA///AGACTTCATCACTATAGGAAGTAAAAAGGTGAGAGATCCCAAGCTGCATGTTGAGGGCAC
A_73_P122981,A_73_120742,A_73_P101596|281779	0.00423499	0.000764607	up	1.784	1.784	0.835117	GFPT1	Bos taurus glutamine--fructose-6-phosphate transaminase 1 (GFPT1), mRNA [NM_001109961]	AGTCAAGATACAAGTTTTACTACCTTGGTGGAGAGAGTCATCCAACAATTGGAAGGTGCT///CCGTAGAATAAGGAGCATCTGAAACTGGGCGATTAATCAACACAAGACACCTTTGTATTT///ATTACTTTGCTTCTGATGCAAGTGCTGTCATCGAACATACCAATCGCGTCATCTTTCTGG
A_73_119341	0.000990753	5.02616e-05	up	1.78397	1.78397	0.835093		BovGen_25313 normal cattle brain Bos taurus cDNA clone RZPDp1056C221Q 5', mRNA sequence [CO896988]	TCAGAGCCCAAGCACCAAGGGCTGGCCCTGGGACCTGCCCAGGCCAAGGTTTTGTTACTT
A_73_103542|282029	0.0109151	0.00303919	up	1.78346	1.78346	0.834677	RAB3A	Bos taurus RAB3A, member RAS oncogene family (RAB3A), mRNA [NM_174446]	GTTCGAGTTCTTTGAGGCAAGCGCCAAGGACAACATTAATGTCAAGCAGACCTTTGAGCG
A_73_P428486	0.0377123	0.0152336	up	1.783	1.783	0.834303		Rep: G-protein coupled receptor 114 - Bos Taurus, partial (95%) [TC412351]	TCTGCTGCCCAGAATGCCTCCTTCTTTTCTACTTGGCCCCGCGAGAATCAGGTGGGCTTT
A_73_P266906,A_73_106514|531733	0.00149601	0.000122059	up	1.78178	1.78178	0.833323	H2AFX	Bos taurus H2A histone family, member X (H2AFX), mRNA [NM_001079780]	ACACCACAAAGGCCCTTTTAAGGGCCACCACAGCACTCACGGAAAGAGCTGGACCACTTC///AGTACTTTAGGTATTGGGGGGAAGTTTCAGATGGACTAATTTTATTAAAGGGTTTTTTCC
A_73_117705|614905	0.000896964	3.91543e-05	up	1.78123	1.78123	0.83287	SEC22C	Bos taurus SEC22 homolog C, vesicle trafficking protein (SEC22C), mRNA [NM_001046546]	TGGGAGCCCAGTCAGAAAGCGCATTACTGGAAGACCAACATGGAATGATTTTGGTCTTTT
A_73_102150|534206	0.00262809	0.000355641	up	1.78069	1.78069	0.832438	TUBB6	Bos taurus tubulin beta 6 class V (TUBB6), mRNA [NM_001046373]	AGGAAGAGGTCAACGAGTAGAGGCATGTCCTGCCTTGGACACCGAGGCTCAGAGGTCTTT
A_73_P047886,A_73_P334206|504807	0.000748197	2.38886e-05	up	1.7805	1.7805	0.832279	COMMD5	Bos taurus COMM domain containing 5 (COMMD5), mRNA [NM_001014850]	TTCTCTAAGTGAAGTAGACAGCTGTGTCTTTCCCTGTTTTTGGAAGTAAAGCAACTGTAT///TTCAGAAAATTGCTGAAGCTGGTGGTCAGCAGTCTGCAGGGAGAAGACTGCCGGGAGGCT
A_73_103042|535342	0.0124404	0.0036257	up	1.77944	1.77944	0.831421	SLK	Bos taurus STE20-like kinase (SLK), mRNA [NM_001206077]	AGCATGCTGTGGTTGGGTTTGGCTTTTTAAGTACGTCATTCTGTTCTCTTCATCTTTAGC
A_73_P058316,A_73_P032466,A_73_P307881,A_73_P458501,A_73_115354,A_73_115635|617620	0.00155297	0.000130683	up	1.77934	1.77934	0.831342	CORO2A	Bos taurus coronin 2A (CORO2A), mRNA [NM_001038220]	ACAATCATTTCTGTGCTGTGAACCCCAATTTCATTGCAGTCGTGACTGAGTGTACTGGTG///GGAAGTCAGAAATTGAGCTATGCTTTTAATACAAAACCGTGCCTGAAATCCTTTGATTAT///TAAAAATTGTTTTTGTTCTTGGCTGATGAAGTACGACTTGCCCAGCATTTGCAGGGCCCT///AAGACAATTAACTGTCACCAAGATGTGATCCTTTCCATGTCCTTCAACACCAACGGCAGC///TTCATAGCAAGGCAGGGTGGGGAAGATTAAGCCAGGAGGGCTGTTTTGTTTTGTAACATT///GTGTATTCTAAGCCCTTTCTCTAAGGTGCTCTCTCTCACAGTGGTCAGTACAACAATGCA
A_73_P494608	0.0015714	0.000133529	up	1.7793	1.7793	0.83131		PREDICTED: Bos taurus ferritin heavy chain-like (LOC781123), miscRNA [XR_083248]	TTCTTTCTTTAGTACCATTCCTTCAAATAAAGTAATTTGGTATGCCACCCTCCCCTCACA
A_73_P308996	0.00638196	0.00141843	up	1.77832	1.77832	0.830514		PPFIA binding protein 2 [Source:HGNC Symbol;Acc:HGNC:9250] [ENSBTAT00000021483]	TTGGCTCGATGATATTGGCTTACCCCAGTACAAAGACCAGTTTCATGAATCCAGAGTCGA
A_73_111753|535578	0.0479498	0.020473	up	1.77794	1.77794	0.830208	EGLN3	Bos taurus egl-9 family hypoxia inducible factor 3 (EGLN3), mRNA [NM_001101164]	TTACTGAGGACTGACCCTGCTCTGAAATCCGCTGGCCTCATTCACTTTTAGTAACAGTTT
A_73_P128601	0.00461588	0.000868859	up	1.77767	1.77767	0.829987		BE04015B1H03 Normalized and Subtracted bovine embryonic and extraembryonic tissue Bos taurus cDNA clone BE04015B1H03 5, mRNA sequence [CN438282]	GTTCCTTCAGTTTTGCCTAAAAGCTGCTGACTTTGGGTTTCTTTTTAAAGCATCTTCCAG
A_73_P107891,A_73_101972,A_73_P278296|280897	0.00975648	0.00258976	up	1.77737	1.77737	0.82974	PLG	Bos taurus plasminogen (PLG), mRNA [NM_173951]	CTGGATTCTGTAATACCAAGGTAATACAGCTATGACATTTGTTGAAAATAAACTCGGTAC///AACATGTTCCTGACTGTGGACTGCTGGATTCTGTAATACCAAGGCAATACAGCTATGACA///AACTACCCAAATGCTGGCTTGACAATGAACTACTGCAGAAATCCAGATGCCGATAAGAGC
A_73_114326|509757	0.0435975	0.0182547	up	1.77699	1.77699	0.829438	ODF3	Bos taurus outer dense fiber of sperm tails 3 (ODF3), mRNA [NM_001080252]	CCCTGTCGTCTCCTTTGGCATCAAACACTCTGACTACATGACGCCCCTGGTCGTGGATGT
A_73_107985|507627	0.00107845	6.17286e-05	up	1.77677	1.77677	0.82926	SLAMF9	Bos taurus SLAM family member 9 (SLAMF9), mRNA [NM_001302662]	GGATCAAAGGGCGGGCATCTCAAGGGCCATGCTCCCAGAGGGATGATTGTCTGGCAATAA
A_73_P127001,A_73_P043721|538827	0.00671401	0.00152893	up	1.77669	1.77669	0.829189	APOLD1	Bos taurus apolipoprotein L domain containing 1 (APOLD1), mRNA [NM_001101180]	GTTTTGATAGTGAAAGATCATTCATCCTCTTTTGTGTCTGTTATAGAGATGGGAGCCTCC///GGGGTATTTAGATTACAAGTGTACTTCAGAACAATATCCGAGTTGGAAAAATAAACACGT
A_73_P495273	0.00702527	0.00163318	up	1.77631	1.77631	0.828884			AGAACCGCCGGGCCAAAGCCAAGCGACTGCAGGAGGCCGAGCTGGAGAAGCTGAAATTGA
A_73_119165	0.0173759	0.00563481	up	1.77605	1.77605	0.828673		PREDICTED: Bos taurus polo-like kinase 5 (PLK5), mRNA [XM_589317]	ATGGCTGTGCCCCAGGCACCCACCAGCACCTTCAGCATGCCATCCTCATGCTACAGAGCA
A_73_119079	0.000512795	2.93091e-06	up	1.77442	1.77442	0.827345		PREDICTED: Bos taurus cell division cycle 25A (CDC25A), transcript variant X1, mRNA [XM_005222839]	ATACCAGCTCAGCTAGCATTGCTAACCAACTGTTGCAGGCTCTGAAAATAAAAACAATCT
A_73_P492528	0.0380109	0.0153803	up	1.77411	1.77411	0.827098		C0009510C22.P1KM13F KN510 Bos taurus colon [FE017569]	ATTCTGTGCTTGAGCATTTGTGCTGTGTGTCCTCAGGCTATTATTTAGACCTACTTAAAT
A_73_P335386|781665	0.00253328	0.000333484	up	1.7739	1.7739	0.826924	IRF2BP2	interferon regulatory factor 2 binding protein 2 [Source:HGNC Symbol;Acc:HGNC:21729] [ENSBTAT00000063370]	CGTGACTTTCCGGTTTCAGAAAAACCCAATGATTAATCTTAACTAAAACTGCTTGAATTG
A_73_P131917	0.0220934	0.00768005	up	1.77379	1.77379	0.826837		Hw_FAT_15_050513_D10 Bos taurus CF-24-HW fat cDNA library Bos taurus cDNA, mRNA sequence [DV779133]	CCCAAAACCCATTTGTGTTTATATTGGGCCCGTGTTTTTCTTTCTCCCCCCAATATAGAA
A_73_P054406|617648	0.00655443	0.00148046	up	1.77264	1.77264	0.825901	LOC617648	GB	TGGAGAATCAAGCCCTGTTGCCTGACCTGCGACAGAAGTACCTGACTGTGCTCACCAACC
A_73_P039381,A_73_P336036|521410	0.00285762	0.000409023	up	1.77211	1.77211	0.825467	YPEL1	Bos taurus yippee like 1 (YPEL1), mRNA [NM_001100386]	CCCCTTTAAGTTCCTACAAGGCTAGCTATTACCCCGTGACTTTTATTTAAATTATTTAAG///TTTATCATCGAGCTCGCTCACATGATCAAAGACAATGGCTGGGAGTAAAGTGGACTTCCT
A_73_109162	0.0028768	0.000412974	up	1.77193	1.77193	0.825319		BovGen_25151 normal cattle brain Bos taurus cDNA clone RZPDp1056N121Q 5', mRNA sequence [CO896826]	GCTGATGTGCTTTGCACTCTGCTCTTGTAGATTTATTTTGTTTACAGTAGACTGATGTCA
A_73_104174,A_73_P441216|282223	0.0300863	0.0114436	up	1.7712	1.7712	0.82473	ENTPD1	Bos taurus ectonucleoside triphosphate diphosphohydrolase 1 (ENTPD1), mRNA [NM_174536]	CCCCTTTCTCTTTTGTACTCTTTGTTTGTGTGGGTCTTAAAGATCTGCCTCCTTTCATGA///AATTGAGTTGGTTTAACCTGAAGCCAAGCAAAGACGACACTCAGGAAACCTATGGAGCTT
A_73_P487053	0.0204232	0.0069339	up	1.77117	1.77117	0.824703			AAACCATCCTGGATATTCCCGCAAACCCGACAGTTGAAAAGCCCTTCGTGGAGATATTAT
A_73_112904	0.0120962	0.00349636	up	1.77053	1.77053	0.824183			ATATACTATGCAAATGTGTACAGTGCTGCATGTTTTGTTCTCCCTCTGCTTTAGTGGCTT
A_73_116782,A_73_P269236,A_73_P235807|532505	0.000629314	9.24648e-06	up	1.76918	1.76918	0.823083	ZADH2	Bos taurus zinc binding alcohol dehydrogenase domain containing 2 (ZADH2), mRNA [NM_001075964]	AAATGGGCATTTTATGCCCCAGAATTACTCAAATCAATTTATTTTTAGTTGGTAATGGAG///TGTCGCCCGTGAAAGCAGGAACACTTCCAGCCAAACTGCTGAAGAAATCTGCCAGTGTCC///ACGCCCGCCACTTACTGGACTTACAGGGCTCGGCCATCCCTAGCAAGATGCAGAAGCTGG
A_73_102160|515555	0.00197918	0.000213163	up	1.76853	1.76853	0.822551	TIMM22	Bos taurus translocase of inner mitochondrial membrane 22 (TIMM22), mRNA [NM_001034498]	CGACCGGTCGTGTCCTTTTGTTGAGTGCCCTGCTATCCTTGTTATATAGATGTATGTGTA
A_73_119137,A_73_P036921|525655	0.00054871	4.34832e-06	up	1.76849	1.76849	0.822519	USP12	ubiquitin specific peptidase 12 [Source:HGNC Symbol;Acc:HGNC:20485] [ENSBTAT00000054576]///Bos taurus ubiquitin specific peptidase 12 (USP12), mRNA [NM_001098059]	CTTTCTTTAAAGCTACTTTTTCATTGAAGATTTCTCTCATGAGGTATTTAACCTGGGAGC///TATTTGGGAAAGGATCAAGCACCGATTTTTCCAAGAAAAGAGAACTGCAGGGAGCTCAGG
A_73_P464041,A_73_P448641,A_73_P038626|520188	0.036187	0.0144412	up	1.76789	1.76789	0.822029	CDC25A	Bos taurus cell division cycle 25A (CDC25A), mRNA [NM_001101100]	TTGCACATGGAAGAGGAGGTTGAAGAGTTCTTACTCAAGAAGCCTATCGTACCTACGGAT///TGAACTTGCACATGGAAGAGGAGGTTGAAGAGTTCTTACTCAAGAAGCCTATCGTACCTA///ACAGGTCTTTGTGGGCTAGCCCACATCATTAATTTATTCAACTTCACCAATCACTTTCTT
A_73_113782	0.0056726	0.00118758	up	1.76681	1.76681	0.821146		Rep: Uncharacterized protein ENSP00000342501 - Homo sapiens (Human), partial (92%) [TC431824]	AAATCACAGGAACCACTACTTTCTAAAGGCCACCATGTCTTTGGGGAAGAAAGATCTACT
A_73_105266	0.00614161	0.00134351	up	1.76671	1.76671	0.821064			CGCACCCTTTAGTTAATTTAAGAAAGAGAGACTTCTCATATTGCCATATGGGGGGAGATT
A_73_P121816,A_73_101702|509471	0.000872082	3.57117e-05	up	1.76657	1.76657	0.820948	UBE2L6	Bos taurus ubiquitin conjugating enzyme E2 L6 (UBE2L6), mRNA [NM_001098917]	ATTTTGCACTTGCTCATGTCTTCCAAGATTTCCTTCTTAGGTTGCGTGTGTGTGTACGGG///TTTAGGTGCAAAACCTTTCCGTTTCCACTGATGAATCATAAAGTGAAGAATCTCCTCTCC
A_73_108103,A_73_P032921|281963	0.0130185	0.00385214	up	1.76622	1.76622	0.820661	P2RY1	Bos taurus purinergic receptor P2Y1 (P2RY1), mRNA [NM_174410]	ATTCAAGCCAAGAAAGCAGTGAATTAACAAATAAAATAGAAGTGGAAATGCCTACACCTC///CAATGATAGGGTGTATGCCACTTATCAGGTGACAAGAGGTCTAGCAAGTCTCAACAGTTG
A_73_107263|512754	0.00276269	0.000385552	up	1.76597	1.76597	0.820459	RPA3	Bos taurus replication protein A3, 14kDa (RPA3), mRNA [NM_001034427]	TTCCAGTGTGCCATTTTTGACAGAACTGGCTTATTGACAGTTCTCACCTAAGTTCTCATA
A_73_P304336,A_73_P037406|515783	0.0399522	0.0163954	up	1.7659	1.7659	0.820404	CLEC3B	Bos taurus C-type lectin domain family 3 member B (CLEC3B), mRNA [NM_001046212]	TGGTTCGACAAGCGATGCCGGGACAAGCTGCCCTACGTCTGCCAGTTCGCCATCGTCTAG///AAGGGTACCAAGGTGCACATGAAGTGCTTCCTGGCCTTCGTCCAAGCGAAGACCTTCCAC
A_73_P044941,A_73_P277106|540815	0.00383104	0.0006543	up	1.76534	1.76534	0.819948	ABI1	Bos taurus abl interactor 1 (ABI1), mRNA [NM_001076241]	GTGGGAAGGAAACTGTTTTTTGTGAGTTTATTTGCTTTTTGTCATCTACTTCTATGCCAA///ACAAAACCCTTGAGCCTGTTAAACCTCCAACAGTTCCTAATGACTACATGACAAGTCCTG
A_73_108614|100295930	0.0283838	0.0106218	up	1.76492	1.76492	0.819602	TRPM4	transient receptor potential cation channel subfamily M member 4 [Source:HGNC Symbol;Acc:HGNC:17993] [ENSBTAT00000008077]	TCATCGTGAGCAAGATGGTGAAGGATGTGTTCTTCTTCCTCTTCTTCCTCGGCGTGTGGC
A_73_119969	0.00933401	0.00242835	up	1.76471	1.76471	0.819435			TTTTTGTTTTGTTTTGCCTTTTAAAGTCTACAAGGAAGCCCCACTTTATCACATGTACAG
A_73_P133716,A_73_P093811|618247	0.000609441	7.3657e-06	up	1.76285	1.76285	0.817911	TMEM35B	transmembrane protein 35B [Source:HGNC Symbol;Acc:HGNC:40021] [ENSBTAT00000029261]	CAAGTAGACATGTGGTCTACCTGGCCCTGCTTTCTCTTGGACACTTTACTGCTCTTTTTT///TAGCGTTCCTCATGTCATGTGAAAGTAAATTTAAATGACCCAAACTTTTAATGCCCCCAA
A_73_P288996,A_73_103530|531519	0.00294182	0.000428801	up	1.76258	1.76258	0.81769	ASGR2	Bos taurus asialoglycoprotein receptor 2 (ASGR2), mRNA [NM_001075952]	CTGACTTGTCAGATGGCACACTTCCAGAGCAATGGCACAGAATGCTGCCCAGTGAACTGG///TTTTGAAGAAAGGAAGGAGAGGAGAGTCTTTAGAAGCATGGGGAGAGCTTGAAGAGGGAT
A_73_114671	0.00326086	0.000505933	up	1.76192	1.76192	0.817146		Rep: Heavy-chain fibroin - Galleria mellonella (Wax moth), partial (6%) [TC454898]	TGCCCCTCGCGGGACCACTGCTGTTGTTGCTGGTGTCCCCTTGTGATATGCAGGTTTTAT
A_73_P031361|614243	0.00492305	0.000954951	up	1.76119	1.76119	0.816551	TMEM65	Bos taurus transmembrane protein 65 (TMEM65), mRNA [NM_001076318]	CGGGATCAAATAATTCAGCATGTATTATGGAAAACACTAACTTATTGTGGCTTGGTTTTC
A_73_115983,A_73_113742,A_73_P442211|533414	0.00161621	0.000143562	up	1.76091	1.76091	0.816322	RAD54B	Rep: ADP-ribosylation factor 1 - Homo sapiens (Human), complete [TC401087]///Bos taurus RAD54 homolog B (S. cerevisiae) (RAD54B), mRNA [NM_001192955]	TCAATCTTGCAATTTGATTAATTTTGGCCTGGTTAGTTTCATTTGGGAATATCCTGAAGC///TCCCTGAAACCTCTCTCCATGTCACAACTGAAGCAATGGAGACATTTTCCTGGAGATCAT///GCAGCTGAACTTACTTGCCTCACTGGACTCTTCATCCTTAGAAGAACCCAAGAAGTCATA
A_73_P072676,A_73_P365616,A_73_P486738,A_73_P043136|767955	0.00608933	0.00132697	up	1.76085	1.76085	0.816271	GML	Bos taurus glycosylphosphatidylinositol anchored molecule like (GML), mRNA [NM_001077025]	TGTCCAGAAAAGAGAACGTGTCCTTATGACATTAGGCGCTGTTTTACTGTCTCCATGCGT///CCCACTTGATGAGTTCCCCATTTAGGAATTGTTTCCAGAGAGAAATAAACACCAGAATCG///AATCTGGAGAGGGACATCACACTCGATTATCCACTTGAAGAGGATATCGAAGGAAATGCG///CCCCATTTAGGAATTGTTTCCAGAGAGAAATAAACACCAGAATCGTTCAGGTTCTGTGGA
A_73_114497|521742	0.00683094	0.00156683	up	1.76083	1.76083	0.816258	FOXN2	forkhead box N2 [Source:HGNC Symbol;Acc:HGNC:5281] [ENSBTAT00000020154]	TTAATTCTTTACAAGGGATATCAAAGCCATAATGGACTTCTTTTGGTTTAGGGTGGGGGA
A_73_111085,A_73_P077744|510101	0.00280372	0.000396293	up	1.76082	1.76082	0.816249	RAB33A	Bos taurus RAB33A, member RAS oncogene family (RAB33A), mRNA [NM_001192993]	AGCAATTATCACTGGAGGGTTTTTTCTTTCCCTTTTTTCCGTGCCTGCGTAACACTGACA///TCAATTTTCATGTGCCTGGCTTGCCGATTGAAGGCTCAGAAATCTCTGCTCTATCGTGAT
A_73_107746,A_73_P326451,A_73_P256401|353108	0.0132965	0.00395313	up	1.76072	1.76072	0.816164	ANK1	Rep: Isoform Mu20 of P16157 - Homo sapiens (Human), partial (45%) [TC468668]///Rep: ANK1 protein - Bos taurus (Bovine), complete [TC439392]///Rep: ANK1 protein - Bos taurus (Bovine), complete [TC413642]	AGCGCCAAGGCAACAGCAACACAAGGGCTCTTTTGTGGCTGGGATGAGATATTTTTTAAA///AGATTTTACTGTGATGTCCGAGGCTGTATAGACTCTCCTGTGGATAAACTGGAATTTTTT///TCACCTATTCGCATGAATGACTGTAGACGCATGACCTACAGTCTTCAATCCTGCCTCTAA
A_73_108944	0.00168329	0.000153621	up	1.76047	1.76047	0.815958		PREDICTED: Bos taurus KIAA1217 ortholog (KIAA1217), mRNA [XM_590767]	CACCCTCCTTTACCAGACAGGCTCTTACTAACTTTTGTTTCTTCATCTCCAGTAGAAGTA
A_73_P493463	0.00966943	0.0025568	up	1.76015	1.76015	0.815697		Rep: PREDICTED: SH2 domain containing 6 isoform 1 - Mus musculus, partial (55%) [TC463584]	AGAACCTCTCTTTCTTCTGTAGCCGCCACCCAGAACACCTCAGGTGCCCAGGAAGGCAAT
A_73_112008,A_73_P511308|783333	0.000629314	9.25316e-06	up	1.76004	1.76004	0.815609	RND3	Bos taurus Rho family GTPase 3 (RND3), mRNA [NM_001191158]	TGCAGCATTATGCTTTGGGCAGTATTACAAAATAGCTGGCAAGTGCTTTCTGTATTTAAA///CATTATGCTTTGGGCAGTATTACAAAATAGCTGGGCAGTGCTTTCTGTATTTTAATATTG
A_73_P331481,A_73_P260776,A_73_P039401|522400	0.00208435	0.000234803	up	1.75996	1.75996	0.815541	KRT80	Bos taurus keratin 80 (KRT80), mRNA [NM_001077952]	AATGCTATATATTATACTACCTGGAGAGACAGCACATGTTCTAGCCAACCCACCCCACTG///AAACTCACATCTCAATTCTTGTGTTGCCTCTGACTAGGAACCAAAGTGAGTGCCCTCACT///TTGGGGGGTAATGCCCCCTTCTCCCTCAAAGGGATGAAATAAAGTGCTGAGATTATTCAT
A_73_P511298	0.00387122	0.00066578	up	1.75974	1.75974	0.815366			TAGACTGTTGGGGTGCAATGTGTTCCAGAGGAGAGCTGCCCCCCATGGACAAGATGCTGT
A_73_104633	0.00544765	0.00111706	up	1.7596	1.7596	0.815246		Rep: REST corepressor 1 - Homo sapiens (Human), partial (7%) [TC489899]	CCCTCAGTGTAGGTATAATTATGGTTTATAAATTCACTTGGCTTAAATCTCTCCCCTCTC
A_73_P097201,A_73_P382206|507577	0.000492345	1.06804e-06	up	1.75926	1.75926	0.81497	EAF1	Bos taurus ELL associated factor 1 (EAF1), mRNA [NM_001192153]	GTGCATGTCTTTAACTTATGGTGATGGGTGATTTTCTCACGTAATTTTTGAACAATCTCA///TTACCAGAAGGACTGTGTGCTGATCATCAATCACGACACTGGAGAGTATGTGCTGGAAAA
A_73_P084601|510442	0.00629982	0.00139322	up	1.75918	1.75918	0.814902	DOT1L	DOT1 like histone lysine methyltransferase [Source:HGNC Symbol;Acc:HGNC:24948] [ENSBTAT00000013182]	AGCTGACCTCAGTTTACACAGCTTCAGTGATGGTGCTTCTCTCTCCCACAAGGCCCCCGA
A_73_P259556	0.0396385	0.0162183	up	1.75896	1.75896	0.81472		phospholipase D family member 4 [Source:HGNC Symbol;Acc:HGNC:23792] [ENSBTAT00000020166]	TCAACCGCTTCCAGCCACTCCGGGATCACTTTGACGGGGTGCCCACCACGGTCTACTTCT
A_73_P037211|100125310	0.00158355	0.000136846	up	1.75865	1.75865	0.814472	B3GALNT2	Bos taurus beta-1,3-N-acetylgalactosaminyltransferase 2 (B3GALNT2), mRNA [NM_001103343]	AAGTGCCCTTTGATGATGACTTTTCGTATCATGTCTGTGGTATTTAATATTTCCCCCTTA
A_73_P130141	0.00619404	0.0013604	up	1.75835	1.75835	0.814221		Rep: zinc finger protein 189 - Rattus norvegicus, partial (21%) [TC428714]	AGCAATAACAGTAACTGCTTCATATGCCAAAGTTTCTCATGGTGGTCTGTTCAATTTTTT
A_73_P072541,A_73_P476493,A_73_P072536,A_73_P072546|407152	0.00610285	0.00133131	up	1.75802	1.75802	0.813954	PTPRC	Bos taurus protein tyrosine phosphatase, receptor type, C (PTPRC), mRNA [NM_001206523]	ATGATCTGCATAAGAAAAGATCCAGCAATTTAGATGAGCAGCAGGAACTCGTTGAAAGGG///CTCAAGATGGCCTCCTTGTCCTGGTGAAATACATTTTATGATTTCCTATTTTAATTCCAG///AGTACATCTTGATTCACCAGGCCTTGGTGGAGTACAATCAGTTTGGAGAGACAGAAGTGA///TCTATCATCCAGCAAGAAGCAGCTTGTTTGTAGTCTTTGTGTGTGTGTGTGTGTGTGTGA
A_73_P068956|510140	0.0206899	0.00705439	up	1.75712	1.75712	0.81321	SEMA4B	semaphorin 4B [Source:HGNC Symbol;Acc:HGNC:10730] [ENSBTAT00000028346]	TCCTCATCTTATTCTTCCTCTACCGGCATCGCGGCGGCATGAAGGTCTTCCTGAAGCAGG
A_73_P250826,A_73_P035266|510325	0.0207266	0.00707407	up	1.75711	1.75711	0.813203	FAM214B	Bos taurus family with sequence similarity 214 member B (FAM214B), mRNA [NM_001014893]	ATTTATTCAAATTGGATTGCCTTGGTAACCTCCCAAACCTGATAATTGGCATTGCCCCCC///TCCTGAAAGCCAACTTGTGTGTGTGTATGTTTGTGTGTGTGTGTGTTGTGTGTGTGGTAT
A_73_P247076,A_73_P030736,A_73_111663|615572	0.000489212	6.88873e-07	up	1.75611	1.75611	0.812385	MID1IP1	Bos taurus MID1 interacting protein 1 (MID1IP1), mRNA [NM_001076383]	TACAGCCACTACGTGCTGCTCAAGTCCATCCGCAACGACATCGAGTGGGGGGTCCTGCAC///ACTGACATTCTATCCATGTTGTACATAGAATGATGAAGGGTTCCACTGTTGTTATATGTC///ATCCTCACTAACAGATACAAGCAGGAGATCGGCTTCAGCAATTGGGGGCACTGAGGCGGC
A_73_P080901|530164	0.00065128	1.0658e-05	up	1.75478	1.75478	0.811288	SLC17A5	Bos taurus solute carrier family 17 member 5 (SLC17A5), mRNA [NM_001205974]	TTTTCTTCACACTATTCGCCAAAGGTGAAGTGCAAAACTGGGCTATCAGTGATCACCGAG
A_73_116856	0.000746166	2.35697e-05	up	1.75393	1.75393	0.810593		Rep: Zgc:103717 - Danio rerio (Zebrafish) (Brachydanio rerio), partial (69%) [TC398505]	TGTAAGTCCTTGCATCTGTGGTGCTAGGTGAGTGTGAGAAGGTGTCAAGGACTGAAAAAA
A_73_108289	0.00329218	0.00051395	up	1.75379	1.75379	0.810478		Rep: PREDICTED: interferon regulatory factor 2 binding protein 2 isoform 1 - Pan troglodytes, partial (85%) [TC443177]	TTAGAGCACTTGGCAAAGCAGAAACGCTTCTAGCTGTATTTGTATGCACTTATTTTAAAA
A_73_115516,A_73_P127936,A_73_P259436,A_73_P232302|505679	0.00338549	0.000535612	up	1.75371	1.75371	0.810407	S100A16	Bos taurus S100 calcium binding protein A16 (S100A16), mRNA [NM_001075218]///Hw_loin_41_050712_G09 Bos taurus CF-24-HW loin cDNA library Bos taurus cDNA, mRNA sequence [DV797605]	CTGAAATGGGAAAAAGGCTTGATCTGGAGTTTTCCTCCCCCTCACCCAGTCCCTTTGTCG///GGGGGCAGTGAGGGGAATTTGATGTAGGCGGATCAATATATAAAATATTTTTTGTTATAT///AAGAACAAGATCAGCAAGAGCAGCTTCCGGAAGATGCTTCAGAAAGAGCTCAACCATATG///ACAAGATCAGCAAGAGTAGCTTCCGGAAGATGCTTCAGAAAGAGCTCAACCATATGCTGA
A_73_118342	0.0238811	0.00849052	up	1.75326	1.75326	0.810037		PREDICTED: Bos taurus chemokine (C-X-C motif) ligand 12 (CXCL12), transcript variant X3, mRNA [XM_005226617]	TTTAAATGGCATCTCCCACAAAATGTGAAAATGGTCCCGGAGAAGGCAGCTTCCTGTATG
A_73_P074316|785034	0.0111107	0.00311765	up	1.753	1.753	0.809825	NOL4L	nucleolar protein 4 like [Source:HGNC Symbol;Acc:HGNC:16106] [ENSBTAT00000039299]	TTTTTTGAAAGAGGTGGATCCAAAAGAGCTGTTTCTAAGCCACACTCCAAGCGCCTGAGA
A_73_P416536,A_73_P350246,A_73_P329936,A_73_P066881|532856	0.0300644	0.0114326	up	1.75235	1.75235	0.809289	ANKRD11	ankyrin repeat domain 11 [Source:HGNC Symbol;Acc:HGNC:21316] [ENSBTAT00000021306]	GAAAAAAGGACAAAGATAAAGTTTCTCTAACCAAGACCCCAAAGCTGGACCGCAGTGATG///GGATGAGCTGGATAAAGCTCTCGAGTTGTTTTCTACCGAAAAGAAGGAGAAAAATGATCC///CTCATCCTTGAGAAATGTCAGAGGGACAGAGAGTTTGATAAGTGTTTTAAAGAGAAAAAG///ATATCCTGGCTGCAGGACGTGGACGACAAGTACGACCGCATGAAGACGTGTCTCCTGATG
A_73_115604|513006	0.0248908	0.00898686	up	1.75194	1.75194	0.80895	NKG7	Bos taurus natural killer cell granule protein 7 (NKG7), mRNA [NM_001035279]	GGTTCCCTCTCTGATTTAGTCACCCTGCCGTTCATCCTTAGTCCTTGTTCATTTCATTAA
A_73_117887|510205	0.00394075	0.000685266	up	1.75153	1.75153	0.80862	SERPINB10	Bos taurus serpin peptidase inhibitor, clade B (ovalbumin), member 10 (SERPINB10), mRNA [NM_001098925]	AGACCACCCGTTCCTCTTCTTCATCAGGCACAACAAAACCAACGGCATTTTATTTTATGG
A_73_P161237	0.00423499	0.000764337	up	1.75153	1.75153	0.80862		LB00471.CR_A17 GC_BGC-04 Bos taurus cDNA clone IMAGE:8054395, mRNA sequence [DT845940]	TATGCACGCTTTCAGTGCCAGAGTTCCTAGATCAATTAAAGATTATTGTGTCGACCTCTT
A_73_114477	0.00468528	0.000890124	up	1.75059	1.75059	0.807838		HW_Fat_70_050831_E01 Bos taurus CF-24-HW fat cDNA library Bos taurus cDNA, mRNA sequence [DV776422]	CCTCCTCCTATGAAGCTACCTTTAAAATAGTCTGAATAGTAGCATTCAGACTCTGCATTA
[truncated: 3,734 more rows]
