# Supplementary material for: Transcriptomic Analysis of MDBK Cells Infected with Cytopathic and Non-Cytopathic Strains of Bovine Viral Diarrhea Virus (BVDV)
Source: Viruses. 2022 Jun 11;14(6):1276. doi: 10.3390/v14061276 (PMC9228727; doi:10.3390/v14061276)
Supplement: Supplementary file 1 [file viruses-14-01276-s001.zip › Table S3_Differentially expressed entities 72h p.i. with cp.xlsx]

## Sheet: Arkusz1
Gene_ID	p (Corr) ( [3] )	p ( [3] )	Regulation	FC (abs)	FC	Log FC	GeneSymbol	Description	Sequence
A_73_P042021|281212	0.012708	1.11211e-05	up	193.206	193.206	7.59399	GRO1	Bos taurus chemokine (C-X-C motif) ligand 1 (melanoma growth stimulating activity, alpha) (GRO1), mRNA [NM_175700]	GTTCAAGCAAACAGATAGGTCACGATCACTGTTAATGTAGGGAATGTATGTATACATTTA
A_73_P107676,A_73_118449,A_73_P108356|280828	0.015973	0.000333116	up	122.356	122.356	6.93495	CXCL8	Bos taurus C-X-C motif chemokine ligand 8 (CXCL8), mRNA [NM_173925]	TGTTAAGCTTACCAATGGAAACGAGGTCTGCTTAAACCCCAAGGAAAAGTGGGTGCAGAA///TCTTGCCCTTATTATGCAATGATGTGTTGTATCATGTGAATCTTGAGACTGTCTTTCCTA///AATCCTGCTTTTTTGTTTTCGGTTTTTGTATATCTTGCAACCCTCGCCTGCTGGCCAGGA
A_73_120285	0.016629	0.000662837	up	92.5734	92.5734	6.53253		T-box 10 [Source:HGNC Symbol;Acc:HGNC:11593] [ENSBTAT00000015683]	GCCAGCAATCCTTTTGCCAAGGGCTTTCGGGAGAGTGACCCAGACTCCTGGCCTATATCT
A_73_P044671|282081	0.0173928	0.000844454	up	76.5926	76.5926	6.25913	SOCS3	Bos taurus suppressor of cytokine signaling 3 (SOCS3), mRNA [NM_174466]	TCTCCAACATCTCTGTCGGAAGACCGTCAACGGCCACCTGGACTCCTACGAGAAAGTCAC
A_73_P291891,A_73_P064036|281376	0.0231187	0.00253838	up	72.6415	72.6415	6.18272	LOC281376	Bos taurus serpin family B member 2 (SERPINB2), mRNA [NM_001192079]	CTAAACAAATGTCTAGCATTATGTATCACATACATGTGGCTGTAACTTATGTAAGGTTGC///AAAGAATGACCTGTTTCTGTCTGAAGTATTCCATCAGGCTTCGGTGGAAGTGAACGAGGA
A_73_P033386,A_73_104667|539571	0.0192595	0.00127487	up	59.9735	59.9735	5.90625	ESM1	Bos taurus endothelial cell specific molecule 1 (ESM1), mRNA [NM_001098101]	GTTGTGAATGTGTGTGTGAGGCTCTTTTAATGTAAGCTGAATAAGCTGTTTGGATTTCTT///TATAGTATATGGACATATGATTTTTGGAGACCAAGTGTGATTTAGGGTGGGTCCACAAAA
A_73_P032056|540846	0.0319545	0.00566192	up	43.0818	43.0818	5.42901	ETV1	Bos taurus ETS variant 1 (ETV1), mRNA [NM_001046492]	TAAATATCCACTTGGAGACTATCTGCCTTGGGCATTTTCCCCCTAGCATTTCTGTGTCTC
ETG09_35454	0.0356079	0.00707091	up	36.321	36.321	5.18273		Unknown
A_73_P050366,A_73_P111946,A_73_P150176|507988	0.0193036	0.00128786	up	30.8849	30.8849	4.94883	CYP3A4	Bos taurus cytochrome P450, subfamily IIIA, polypeptide 4 (CYP3A4), mRNA [NM_001099367]	GCTTGATTTACTTTGTGGTAAAACTCAGAAATAAAGACAGCCTTCATCTATTGCACTTGC///GCCTGAGGAGTTCCGTCCTGAAAGGTTCAGTAAGAAGAACAAGGACAGCATAAATCCTTA///TTGTGGAGAATGTCAAGAAGCTCTTAAGATTTAGTATCCTCGATCCCTTTCTTCTCGCAG
A_73_107648|617047	0.017321	0.000801699	up	30.4122	30.4122	4.92658	C27H8orf4	Bos taurus chromosome 27 open reading frame, human C8orf4 (C27H8orf4), mRNA [NM_001035490]	CAGTTACTGCAGTAAGCATTAGGAAGCGAATATGAGACACTTAATAGTTTATAAAGATGC
A_73_P063336	0.0230447	0.00249236	up	29.0628	29.0628	4.8611		contactin 4 [Source:HGNC Symbol;Acc:HGNC:2174] [ENSBTAT00000060980]	ATTCGAATTCCAAAGATATCAAATGCCTATGCAAGAGGAGCCGGGCCGTCCACTTCAAAT
A_73_P103746,A_73_121270,A_73_P117406|404070	0.0187282	0.00113657	up	27.3686	27.3686	4.77445	MT2A	Bos taurus metallothionein 2A (MT2A), mRNA [NM_001075140]///Hw_loin_23_050701_B04 Bos taurus CF-24-HW loin cDNA library Bos taurus cDNA, mRNA sequence [DV797790]	GCGGGGAGAGCCTGCTCCCCGGTGTAAATAGAACAACGTGTACAAACCTGCATATTTTTT///CCTGAAGGCGGGGAGAGCCTGCTCCCCGGTGTAAATAGAACAACGTGTACAAACCTGCAT///GGATTGAAAAATGTTCTTAAACGCTTTTCCGCGAAACACCACAATCCCTTCCCCCTTTAA
A_73_121188	0.0205348	0.00173383	up	26.4161	26.4161	4.72335		BE04006X1A02 Normalized and Subtracted bovine embryonic and extraembryonic tissue Bos taurus cDNA clone BE04006X1A02 5, mRNA sequence [CN436084]	CCCCATCTTTCAGAGTGATGTCATTTCTACATTTGATATGCTTGTATTTCTGTAGGATGT
A_73_P040981|404071	0.0197036	0.00143266	up	26.0783	26.0783	4.70478	MT1A	Bos taurus metallothionein-1A (MT1A), mRNA [NM_001040492]	GCCCTGTGGGCTGTGCCAAGTGTGCCCAGGGCTGTGTCTGCAAAGGGGCCTCGGACAAGT
A_73_106148,A_73_P496078|505165	0.0176142	0.000886456	up	25.6216	25.6216	4.67929	RRAD	Bos taurus RRAD, Ras related glycolysis inhibitor and calcium channel regulator (RRAD), mRNA [NM_001045913]	ATGCCCTGGAGGGAGGCTGTTCAGTGCAGTGGCTATTTGTTTACATGCAGATTTTTGTAA///TTTGACTGCAAGTTCATCGAGACGTCGGCTGCACTGCACCACAACGTCCAGGCACTGTTC
A_73_118029	0.0162642	0.000542775	up	24.8604	24.8604	4.63578			GTGTTGCATTGCATTTATTTCAGTTGTATTTATGTACATGTATACCTGTCATGCTTCTGG
A_73_P287371,A_73_P052021|509585	0.0369105	0.00757108	up	24.1573	24.1573	4.59439	ACKR3	Bos taurus atypical chemokine receptor 3 (ACKR3), mRNA [NM_001098381]	GACTTTTCTGTGCTGCCTAAAGGTTTCATAATGGGGATTTGTATTTAAATCTTAAGACTC///CTTCCGTTTTGACTAAGGATGACATTAATTGTTAGCTGTTTTGAAAGCCTCTCTCTATAT
A_73_P397861,A_73_112272|512632	0.0459799	0.0115536	up	23.9822	23.9822	4.58389	DENND2A	DENN domain containing 2A [Source:HGNC Symbol;Acc:HGNC:22212] [ENSBTAT00000033630]	AATTCAGAAAGGAGGAACTTCAAACTGCTGGACACAAGGAAGTTGAGTCGGGATGGAACT///CGGGAGGCAGCTTACTCAGAACAGCACTGGAAATGGGACCTGGGACCAGGCACATTCAAA
A_73_108688|613667	0.014751	2.44289e-05	up	23.6122	23.6122	4.56146	CXCL3	Bos taurus chemokine (C-X-C motif) ligand 3 (CXCL3), mRNA [NM_001046513]	ATGTCTTGCTTGTAAGGCATAATGCCTTGTTTAATGTTTACTATGTGGTGTTTCTCTTTG
A_73_P338001,A_73_116746|523822	0.0155841	0.000224116	up	23.5831	23.5831	4.55968	TNFRSF11B	Bos taurus TNF receptor superfamily member 11b (TNFRSF11B), mRNA [NM_001098056]	TTCTCAGGCGCTTGAGGAGGGAACAATGATTTCTTTCTCATCACCAAGGACTAGCTTTGA///ATCTGGTCCAGTATCTACTGCCTCTATTTTCTCTTGTTACTGCTTGCAGTAATTCAACTG
A_73_102135	0.0233457	0.00263838	up	21.8155	21.8155	4.44728		1264598 MARC 7BOV Bos taurus cDNA 5', mRNA sequence [DN521695]	GGGGCTGGGAAACAGAATGTATACTGCATGTTTGTTTCTCCTTTTGGGTGACAATGACAG
A_73_P087826|100295476	0.0247576	0.00311656	up	21.4931	21.4931	4.4258	EREG	epiregulin [Source:HGNC Symbol;Acc:HGNC:3443] [ENSBTAT00000013571]	ATCGAAAAAGTAAAGAACCCAAGAAAGAATATGAAAGAGTGACCTCAGGGGATCCGGCAT
A_73_104964|538751	0.0196941	0.00141	up	20.5906	20.5906	4.36391	AREG	Bos taurus amphiregulin (AREG), mRNA [NM_001099092]	CAGCAAATCCCAAGAAAACAGAACCTTTTCGTTCTGATGGTTTTAAACTTTCAATTGTCA
A_73_107738,A_73_P425526,A_73_P333276,A_73_P452126,A_73_105268,A_73_P055396|282358	0.0164493	0.000603489	up	19.781	19.781	4.30604	SLC2A3	Bos taurus solute carrier family 2 member 3 (SLC2A3), mRNA [NM_174603]	AAATGGAAAAGCCTTAGTGCATTGCCTTGCATACTTAATAAATTATGTTGCTTGCGTTCA///GCATGGAATTTTTTCCAGTTCTCAGTGACCAGGTTGTGAATAATTTCCAAATGGATTTTT///GAAAGTCCTAGATTCTTGCTCATTAACAGAAAGGAGGAGGAGAAGGCAAAGGAGATCCTC///ATTGGAGGATGCATGATGTGGTGTATGAAGTTTGCACGTTGCCTCTTAACATTTCTATCC///CGCTCAGAGGATCCCAAGGCTGGGGTTAGTCGTTGTGTTCAATGGCTTTTAAAAATTCAT///TTCAAAGTTCCTGAGACCCGTGGCAGGACTTTTGAGGAAATTACACAAGTCTTTGAAGGA
A_73_P110576,A_73_P052371,A_73_P120886|281666	0.0324659	0.00585729	up	19.6105	19.6105	4.29356	CCL20	C-C motif chemokine ligand 20 [Source:HGNC Symbol;Acc:HGNC:10619] [ENSBTAT00000028430]///Bos taurus C-C motif chemokine ligand 20 (CCL20), mRNA [NM_174263]///C0009291L22.Q1KM13R KN510 M. bovis infected Bos taurus DC [FE011604]	AGAGTCAAAAGGATGTAAAAATGGATGCTCCCTGGAATGGAATTGGGCAGAGCCCAAGAA///ACATGCTCAGTCAAAGAGTCAAGAGGATGTAAAAATGGATGCTTTTTGGGATGGAATTGG///CAATAGCACTGACATCAAAGCAGCCAGGAGCAAATTCTTGCTGCTGCACATCATTTTCAA
A_73_104337	0.0477043	0.0123238	up	19.5123	19.5123	4.28631		Rep: PAOX protein - Bos taurus (Bovine), partial (9%) [TC425889]	TAAGAATATTTCAGGGATTTTATGCCCAGACTTCCTCTACCTTTTAAAAAGGGTAAGTAG
A_73_115779,A_73_P264276,A_73_114364|615850	0.0173928	0.000844249	up	18.8558	18.8558	4.23693	PTPN5	Bos taurus protein tyrosine phosphatase, non-receptor type 5 (PTPN5), mRNA [NM_001102293]	GTGGTATACGATGGCGTGGAGATCACCGTGCGGAAAGTCATCCACACTGAGGATTACCGG///ATTTCCTCATCTAGAAACTACAAGGAGTGAGAGCAAGAGAACCACACTGCTGATGACTCC///ACGGCAGACAGAGACATTTGGTGTCTTTTTATAATTTGCTCATGGTCATTGAATAGAGCA
A_73_106541|327681	0.0161901	0.000496887	up	18.1361	18.1361	4.18079	FST	Bos taurus follistatin (FST), mRNA [NM_175801]	TGAAGACCAGGACTACAGCTTTCCTATATCTTCCATTCTAGAGTGGTAAACCCTCCACCA
A_73_103483	0.014751	6.80645e-05	up	17.8111	17.8111	4.15471		Rep: SNAP25 homologous protein SNAP33 - Arabidopsis thaliana (Mouse-ear cress), partial (5%) [TC409969]	TCTTCACTGTAACCCTTTCTCATCCCACATCAAAAGTTACCACAGAAGGTTTCCTTTGTA
A_73_P100626,A_73_115413|286837	0.0367415	0.00747915	up	17.7962	17.7962	4.15349	TAP	Tracheal antimicrobial peptide [Source:UniProtKB/Swiss-Prot;Acc:P25068] [ENSBTAT00000063757]///Bos taurus tracheal antimicrobial peptide (TAP), mRNA [NM_174776]	AAACAGATTGGCACCTGTGTTGGCCGGGCCGAAAAATGCTGTAGAAAGAAGTAAAAGAAG///AAGACACAGCCGGGATCAATGCCCAGTCAGAACGTGCGCCCTTTGACGGAGCGTCTAAAA
A_73_101129|407165	0.016629	0.000619085	up	17.6627	17.6627	4.14263	LOC407165	LB03510.CR_L01 GC_BGC-35 Bos taurus cDNA clone IMAGE:8677971 5', mRNA sequence [EV679641]	AGTGAAAGGTCAAGAGCCAGTGAAAGGTCAAGATCCAGTGAAAGGTCAAGATCCAGTCAA
A_73_P035016,A_73_107706|280826	0.0155841	0.000208456	up	17.4438	17.4438	4.12464	IL6	Bos taurus interleukin 6 (IL6), mRNA [NM_173923]	TATCCTCATCCTGAGAAACCTTGAGAATTTCCTGCAGTTCAGCCTGAGAGCTATTCGGAT///AATGGCTATGTGGCTTGAATGTCCTTATTGTTTTGGAGACAAATCATTTCTTGAAATGTG
A_73_101573,A_73_P455771,A_73_P255926|513343	0.0190636	0.00123444	up	17.4302	17.4302	4.12352	TMPRSS4	Bos taurus transmembrane protease, serine 4 (TMPRSS4), mRNA [NM_001101973]	CAGAAGGCATTGCTAAGCCAAGAACTTTCTACTCTATTGAATGGAAACAGACGCTCTTCT///AGAACTCGGTGCAATGCAGAGGATGCGTACCAGGGGGAGGTCACCAAGACGATGATGTGT///TTCAGAGCTGTGGACGCTGGCCCAGCCCAAGATCTGGACATCGTCAAAGTCACAGAGAAC
A_73_107068|785576	0.0317195	0.00555772	up	17.4094	17.4094	4.12179	FGF21	fibroblast growth factor 21 [Source:HGNC Symbol;Acc:HGNC:3678] [ENSBTAT00000015438]	CTTTCGGGAGCTGCTTCTTGAAGATGGATACAACGTCTACCAGTCGGAGACCCTGGGCCT
A_73_P061596,A_73_119265|531389	0.016629	0.000626784	up	15.9334	15.9334	3.99398	FOSL1	Bos taurus FOS like 1, AP-1 transcription factor subunit (FOSL1), mRNA [NM_001205985]	CAAACTGGAGGATGAGAAATCTGGACTGCAGCGAGAGATTGAGGAGCTGCAGAAACAGAA///TCTGAGAAGACTTTAGCTACAAGCCTCCACAGCGTGGGCAGCTGCTATTTATTTTCCTAA
A_73_115013,A_73_103117|541166	0.0352289	0.00690047	up	15.5548	15.5548	3.95929	ETV5	Bos taurus ETS variant 5 (ETV5), mRNA [NM_001192834]	CATAGTCTATACATAGATGCATATTTTACCCCAAGCTGGCTAGAGGTTAATTTGTTGTAA///AATTTTAGGAGAAGGTGATTAACACTTTTGACAGTATTTTGTTTTGCTTTGATTCGGGGG
DCP_22_4	0.0167188	0.000714334	up	15.109	15.109	3.91734		Unknown
A_73_116071|504404	0.0259596	0.00354114	up	14.5766	14.5766	3.86559	BEND7	BEN domain containing 7 [Source:HGNC Symbol;Acc:HGNC:23514] [ENSBTAT00000027718]	CCCAAGAGACTGGGTTCAGATTCTGCAGGATCAAATCAAACTGGCGAGAAGAAGGTTAAA
A_73_P111571,A_73_P254341,A_73_117206|513055	0.018312	0.0010437	up	14.466	14.466	3.85459	RGS2	Bos taurus regulator of G-protein signaling 2, 24kDa (RGS2), mRNA [NM_001075596]	GCCAAAACTGTCCTGATGGCAGCTAAACTTTGAAGTGGTCTTTGAATACTTTTAATAAAT///GCAGGAGCTTAAGACTGAAAGATAACAATGTAACACTATTGGTCCAGAAGCATTTACAAT///GTACTAGAATGAGTGCTTTTGTGTAGAAAATGACAATGTCCATTATGAGTGCCAAAACTG
DCP_22_0	0.016959	0.000732382	up	14.4512	14.4512	3.85312		Unknown
DCP_22_2	0.0159636	0.000325828	up	14.4275	14.4275	3.85075		Unknown
A_73_111876	0.0152818	0.000102747	up	14.4163	14.4163	3.84963		PREDICTED: Bos taurus follistatin (FST), transcript variant X1, mRNA [XM_005221516]	TTAAAGGCTAGTCTGCTGTACCTTTTCAACTAGTTCTTTTCACCCAATGTGTCATGAAAA
A_73_114984|281095	0.0181292	0.000990052	up	14.0888	14.0888	3.81648	CSF2	Bos taurus colony stimulating factor 2 (CSF2), mRNA [NM_174027]	CTGGCTTGTTCAGGGCCATGTTGACCCTGATACAGGTGTGGCAGGGGAAACGGGAAATGT
(+)E1A_r60_a22	0.0170162	0.000747453	up	14.0096	14.0096	3.80834		Unknown
A_73_117821,A_73_P268996|533630	0.0154489	0.000125253	up	13.1775	13.1775	3.72	PSPH	Bos taurus phosphoserine phosphatase (PSPH), mRNA [NM_001046355]	AAGAAGAAGGAATTGATGAGCTGGCCAAATTCTGTGGAGTTGAGGATGCCGTGTCAGAAA///ACACCTTCACTATTGGGAATGTGGATTAGGCAGCTTTAAATGAAATTGGTTTTCCCTTTA
A_73_P321311,A_73_108598,A_73_P041596,A_73_P154337|514407	0.0354227	0.00698561	up	13.1315	13.1315	3.71496	GMFG	Bos taurus glia maturation factor gamma (GMFG), mRNA [NM_001024537]///960544 MARC 1BOV Bos taurus cDNA 3', mRNA sequence [CK772108]	ACCTGAACTCAAACCCCCTAGGGCCTGAACATCCCAAACCTTAAAGAAATTAAAATGCAA///CCCTAGGGCCTGAACATCCCAAACCTTAAAGAAATTAAAATGCAACAACTCAGAGACCCT///AACCCCCTAGGGCCTGAACATCCCAAACCTTAAAGAAATTAAAATGCAACAACTCAGAGA///AAGAGATGAATGTGCTTACACACCTCAAAACTAATGAAGATGGGGGTTTTGGGCCCTCAC
A_73_113527|281368	0.0164493	0.000604598	up	13.1214	13.1214	3.71385	OLR1	Bos taurus oxidized low density lipoprotein receptor 1 (OLR1), mRNA [NM_174132]	TGTAGATAGTATTGTTATCATTTGTTGTTCTTATTTTCAAAGTCTTCTGCTAGTATGTAG
A_73_103407|100296588	0.0172967	0.000791945	up	12.8096	12.8096	3.67916	C3H1orf162	PREDICTED: Bos taurus chromosome 3 open reading frame, human C1orf162, transcript variant 1 (C3H1orf162), mRNA [XM_002705653]	TCATCCATCACTTTCCATTTTAACAAATTTTGGACTACGACCAGACGAAACCACAGCTGG
A_73_P064581|505184	0.0277192	0.0041645	up	12.752	12.752	3.67265	SERPINB2	Bos taurus serpin peptidase inhibitor, clade B (ovalbumin), member 2 (SERPINB2), mRNA [NM_001192051]	TTTATTGTGCACAAGATAACCAAGAGCATTCTCTTTTGGGGTAGATTTGCATCACCCTAA
A_73_P411486,A_73_P085696|782605	0.0173221	0.000829099	up	12.2929	12.2929	3.61975	ELL2	Bos taurus elongation factor, RNA polymerase II, 2 (ELL2), mRNA [NM_001191146]	GAATATCTCACCTGACAAATAGAGTGCCGCCAACATTAAACGGCCATTTGAATCCCACCA///GGCACTAGAGCTCTGCTTGGACCAGAAGATGTGAATAAACTTAAGCTTATTTATTTAAAA
A_73_114316	0.0261929	0.00363258	up	12.2118	12.2118	3.61021			ATGGTCAAGGTTGCTGTTTTTTGCTATCACTTCTGGATTGTGCTTTGCCTGGTGTTTCTT
A_73_115534|101905331	0.0216582	0.00207618	up	11.9868	11.9868	3.58338	TUNAR	Bos taurus TCL1 upstream neural differentiation-associated RNA (TUNAR), long non-coding RNA [NR_131934]	ATCTCACGGGTTCCGTGTGGTTCTAGAAAGACTGTGTGAGAATTCTGAACAGTGTACACA
A_73_P167523,A_73_120432,A_73_P053796,A_73_P036041|526682	0.0390566	0.00857188	up	11.814	11.814	3.56243	CYP3A5	Bos taurus cytochrome P450, family 3, subfamily A, polypeptide 5 (CYP3A5), mRNA [NM_001075888]	TGCCAAGAAGCTCTTAAGATTTGATATCCTTGATCCATTTCTACTTTCAGTAGTACTCTT///TGGAAACGTTCTATCCTACCGAAAGGGTGTTTGTGAGTTTGATGAAGAATGTTTTAAAAA///TTTTCTGAAGGTTGTGCTCAGAGATGAGACCATAAGTGGAGCTTGACTTCCCTTAAGGAC///GGACTTGATTTACTTTGTGATAAAACTCAGAAATAAAGACGGCCTTCATCTATTGCACTT
DCP_22_6	0.015973	0.000370005	up	11.6668	11.6668	3.54434		Unknown
A_73_P031796,A_73_P504623|505455	0.019308	0.00129391	up	11.6544	11.6544	3.54281	IER3	Bos taurus immediate early response 3 (IER3), mRNA [NM_001075202]	TTTATTTTAACTTATGCAGGAGTGCGAGATGTGCACCTTGCTGCAAATGCAGGTCTCTGG///GTGGGGAATGAGTGCGTCGTTAACTTATTTCTCATTGCTCCTAAATATATTTATGTGTAT
A_73_P030731|525072	0.0192648	0.00127616	up	11.6361	11.6361	3.54054	PLA2G4A	Bos taurus phospholipase A2, group IVA (cytosolic, calcium-dependent) (PLA2G4A), mRNA [NM_001075864]	GTGTATGAGTGTAATTCACTGACTGGATTTATTCATGCCATGAGACAACACTAGTTTTTA
A_73_100334,A_73_P089051,A_73_108732|518974	0.0154489	0.000143437	up	11.4517	11.4517	3.51749	ATP6V0A4	Bos taurus ATPase, H+ transporting, lysosomal V0 subunit a4 (ATP6V0A4), mRNA [NM_001205851]	GGGCTAAACTTTACAGGATTAGGAACTTTCTCATGAATTTTCACTCCAGGTGAGGAAGAA///AATGAGGGGAGTGGGAGTGCCAAACTCATGTTTTCATGTAATTAAACTTTTGGGGCATTC///TGGAGTGTCCAACCCATGTTCAGAAATGGCACGTGGAGTATGCAGGTATTGAAAACGAAT
A_73_106583	0.0201272	0.00159683	up	11.4222	11.4222	3.51377		PREDICTED: Bos taurus cadherin-like and PC-esterase domain containing 1 (CPED1), transcript variant X2, mRNA [XM_005205664]	GAGGTTAGCTTTGCATTTACCTCTTTACCACTGAAATAGTAGTGGATTTTAGAAACAGTT
A_73_106264	0.0265766	0.00376574	up	11.3728	11.3728	3.50751		1372248 MARC 7BOV Bos taurus cDNA 5', mRNA sequence [DN536167]	TTCCTCTCCACCATGGCCCCTGTGTGGTGAAGCTCAACAGACATTGTTTTGGGGGGAAAA
A_73_112872|540641	0.0155841	0.000257424	up	11.3691	11.3691	3.50704	NOCT	Bos taurus nocturnin (NOCT), mRNA [NM_001082454]	GCATGCCCTTGGGAAGGAACCCCGTTAGCTCACATTAAAACCTTTTCCATTAAAACCTAC
A_73_121264	0.0161901	0.000484707	up	11.2025	11.2025	3.48575		Rep: A-kinase anchor protein 6 (Protein kinase A-anchoring protein 6) (PRKA6) (mAKAP). - Rattus norvegicus, partial (8%) [TC414419]	GCTGAGGAACTGTCTCCATCATCATACATGTAGAAAAAATATCTGAACATTTAAGTGGTA
A_73_P251556,A_73_110397|282259	0.018953	0.00119428	up	11.1587	11.1587	3.4801	IGFBP1	Bos taurus insulin like growth factor binding protein 1 (IGFBP1), mRNA [NM_174554]	TCATGCTTCTGTCTTAAAGAGCATAGGAAAATACTGCCTAGCAAGTAGCAATGATTTTTT///TATCTGCCAAACTGCAACAAGAATGGATTCTATCACAGCAAACAGTGTGAGACGTCGCTG
A_73_105924,A_73_P109016,A_73_P109011,A_73_P103351|281375	0.0208339	0.00184965	up	10.8193	10.8193	3.43554	SERPINE1	Bos taurus serpin family E member 1 (SERPINE1), mRNA [NM_174137]	ACTCAGTACCCCCACGTGTGGGGTCCATGGCTCTTGAAATTGCTTTTTCACTTTTGATAT///TGTGGGGTCCATGGCTCTTGAAATTGCTTTTTCACTTTTGATATAGAAGCAAGTAAAAAA///ATCGTCAACGACTGGGTGAAAAGACACACAAAAGGCATGATCAGCGACTTACTTGGTGAA///GAGATGTCCAAGAGGAAGAAAGTCCGGAGCAAAGAATTTTTATTAATTCATTTTTCTGGA
A_73_120777|508869	0.0154489	0.000149868	up	10.7726	10.7726	3.42929	RND1	Bos taurus Rho family GTPase 1 (RND1), mRNA [NM_001046016]	AGTCGGGGGGAGGGGGGAGTGTTTCAATCTGTTCTATGTTCTGTGTTTAAAGAAGAAAAC
A_73_114455	0.0208393	0.00186969	up	10.6266	10.6266	3.40961		1361108 MARC 7BOV Bos taurus cDNA 5', mRNA sequence [DN533009]	ATGATATTTAGGTTTTTGGCTGAGTACTGGAATAAACAGTGAGCATATCTGGTATATGTC
A_73_119163|533129	0.0240172	0.00287768	up	10.5504	10.5504	3.39923	ETV4	ETS variant 4 [Source:HGNC Symbol;Acc:HGNC:3493] [ENSBTAT00000010973]	CAGGCTCTGGGGTATCCAGAAGAACCGGCCAGCTATGAATTACGACAAACTGAGTCGCTC
A_73_114229|514876	0.039813	0.00887545	up	10.3714	10.3714	3.37454	CALCB	Bos taurus calcitonin related polypeptide beta (CALCB), mRNA [NM_001143737]	AAAGTTGTCATGGCAGAACCCTCCAATTCTTGCTTCATCCCTCATGCCTCGTCATTGATT
A_73_104856	0.0152818	9.71271e-05	up	10.3385	10.3385	3.36996		Rep: PEA3 protein - Canis familiaris, partial (41%) [TC473986]	CTGGGGTTTCACCTCCACTACATCTGCCAGATCCTAATAAAGGCCCCTGCTTCTCCTGTG
A_73_P077206,A_73_P451641,A_73_104029|503620	0.0161901	0.000511362	up	10.2216	10.2216	3.35355	FLT1	Rep: Isoform sFlt1 of P17948 - Homo sapiens (Human), partial (41%) [TC407676]///Bos taurus fms related tyrosine kinase 1 (FLT1), mRNA [NM_001191132]	CGGATCTCCAAATTTAAAAGCACGAGGAATGATTGTACCGCACAAAATAATGTAAAACAT///ATTGACCAACGCAATCCCCACAATAATGTATTCTACAGCATCCTTGTTATTGACAAAGTG///GGACTTCTTCCAGGAAGATATTTCTGCTCCAAAGTTTAATTCAGGGAGTTCTGATAATGT
A_73_P038001|281499	0.016629	0.00062541	up	10.0788	10.0788	3.33326	SPP1	Bos taurus secreted phosphoprotein 1 (SPP1), mRNA [NM_174187]	GAAGACAAACACCTGAAAATTCGTATTTCTCATGAATTAGATAGTGCCTCTTCTGAGGTC
A_73_112747|618677	0.0230134	0.00246776	up	9.90261	9.90261	3.30781	GDF15	Bos taurus growth differentiation factor 15 (GDF15), mRNA [NM_001206298]	ATGGCCGCGTGTCACTCACGCCTTTTGACGACCTCGTGGCCAAGGACTGTCACTGCGTGT
A_73_108306|507550	0.0176142	0.000892669	up	9.78676	9.78676	3.29083	LOC507550	Bos taurus uncharacterized LOC507550 (LOC507550), mRNA [NM_001098903]	GGAGTTCTATGTTGAGACGCACTGGGCAGAACTTCATGTCACTGTCAAAGGTGGTATAAA
A_73_105193|539466	0.0203297	0.00168589	up	9.75105	9.75105	3.28556	PPP1R3C	Bos taurus protein phosphatase 1 regulatory subunit 3C (PPP1R3C), mRNA [NM_001076164]	GGCTAGCACCCACAATTTTTCTAGTCTAAATATTTCACTCTTCTGTAGCTATCCTCTGTG
A_73_P031116,A_73_104460|286836	0.0161901	0.000511592	up	9.5701	9.5701	3.25853	DEFB4A	Bos taurus defensin, beta 4A (DEFB4A), mRNA [NM_174775]	CAGAAACTGCGCCCTTCAACACACCGTCTAAAATTTAAACGAGAATAAATTTTGTTCAAA///AAAGCTGCCGTTGGAATATGGGTGTCTGTATTCCGTTCTTGTGCCGTGTAGGCATGAGAC
A_73_100500	0.014751	7.83218e-05	up	9.46354	9.46354	3.24238			TTTCCAGCCCAACCATCAAGGACAAACCTGTTCAGATCCGTCCTTGGAATTTGAGTGATA
A_73_119056,A_73_P160687|516864	0.0155841	0.000259536	up	9.38325	9.38325	3.23009	ALDH1L2	Bos taurus aldehyde dehydrogenase 1 family member L2 (ALDH1L2), mRNA [NM_001191391]	CTTAGGTGAGGAAGCTCTAAACGAATACCTCAAAACCAAGACTGTGACGTTGGAGTACTA///CAAATTTGAAGACTTCATCCAAAAGGTCGTGAGGAAACTGAGAGGAGAGGATCAGGAAGC
A_73_107237|509630	0.0343078	0.00655657	up	9.37759	9.37759	3.22922	KIAA1958	KIAA1958 [Source:HGNC Symbol;Acc:HGNC:23427] [ENSBTAT00000021628]	TTTACGTCACCGTAAAGAAGAGTGACGGCTCAGACTTCCTGGCCACGTCACTGCACGCCA
A_73_P031501	0.02346	0.00267163	up	9.36183	9.36183	3.22679		Bos taurus chemokine (C-X-C motif) ligand 2 (CXCL2), mRNA [NM_001048165]	GTTAAGAAAATCATCGATAAGATGCTAAACAAGGCTAGTGCCAACTGATCAAGAGAGATG
A_73_P440816,A_73_106263|518752	0.014751	3.10532e-05	up	9.30139	9.30139	3.21745	ARG2	Bos taurus arginase 2 (ARG2), mRNA [NM_001017942]	ACCAACTTCCAACTCCCAGCTCACCAGATGAATCAGAGAGTGAAGAACGTGTAAGAATTT///TAGTACTGTACTGTATTTGGTTTTTTGACGCTCACAGGGTATTAATATGTTGGAGCGCTA
A_73_P066901|526379	0.0434674	0.0104724	up	9.18248	9.18248	3.19888	MYLK3	myosin light chain kinase 3 [Source:HGNC Symbol;Acc:HGNC:29826] [ENSBTAT00000019734]	AAGAAACACTTCTACGTGGTGACTGCTGCCAACAGGTTAAGGAAATTTCCAACTTGTCCC
A_73_P036571,A_73_P481590|788039	0.0156265	0.00028891	up	8.88226	8.88226	3.15093	ARL4C	Bos taurus ADP ribosylation factor like GTPase 4C (ARL4C), mRNA [NM_001102348]	AGACATCTTCCAGATGGTTTGGACCCTGTCCATGTGTAGGTCATTATCACACAAAGAGAC///CAGCGGAGACTTCGCAGGAGACAAAGCCCATCGGGAGAGACGCGATGCCCGGCCGGCGCG
A_73_106251	0.0242444	0.00294633	up	8.862	8.862	3.14763		Rep: LOC788858 protein - Bos taurus (Bovine), complete [TC446482]	TCCCCTTGTATTGCTAGCACCTCTTCTAATATTAGACACACATATAGGCATTCACAACTG
A_73_P041516,A_73_P095106,A_73_P348536|520192	0.020901	0.0018792	up	8.84727	8.84727	3.14523	EPHA4	Bos taurus EPH receptor A4 (EPHA4), mRNA [NM_001083441]///ephrin type-A receptor 4 precursor [Source:RefSeq peptide;Acc:NP_001076910] [ENSBTAT00000013238]	AACTGTTTCCCAAAATCCAGGTTGGCTGCAGTCTTATAAATATCTATAGAATCCTAACAA///TATAAGGATAACTTCACTGCTGCTGGTTATACCACGCTAGAGGCTGTAGTGCACATGAAC///TGGAAGTTCGAGGCTCCTGTGTCAACAACTCTGAAGAGAAGGATGTGCCAAAAATGTACT
A_73_P083201|541257	0.0308429	0.00522087	up	8.84423	8.84423	3.14474	NR6A1	nuclear receptor subfamily 6 group A member 1 [Source:HGNC Symbol;Acc:HGNC:7985] [ENSBTAT00000052227]	CGTTGCCAGTTGCCTCCACAGCAAGAAGAGTTTTTGTTTGTTTGTCTTGTTTTTTAACCT
A_73_101654,A_73_P108296|282653	0.0188405	0.00115336	up	8.78385	8.78385	3.13485	AQP1	Bos taurus aquaporin 1 (Colton blood group) (AQP1), mRNA [NM_174702]	TCTGCTCTGCATATATGCCTCTTTGGAATTGGAATTTCATTATATGTTAAGAAAATAAAC///GAGGAGTATGACCTGGATGCCGACGACATCAACTCCAGGGTGGAGATGAAGCCCAAATAA
A_73_P034106|528920	0.0269479	0.00387578	up	8.63383	8.63383	3.11	EVI2A	Bos taurus ecotropic viral integration site 2A (EVI2A), mRNA [NM_001034568]	GTTATGCCAGATGCTTTCATCTTTACATGTGGTGTACATAAGAAAGTCGTTTTCTACTAT
A_73_P039036,A_73_P100786|783935	0.016629	0.000631924	up	8.5311	8.5311	3.09273	DEFB5	Bos taurus defensin, beta 5 (DEFB5), mRNA [NM_001130761]	AATGAGGAGTCAGAAACTGCGCCCTTCAACACACCGTCTAAAATTTAAACGAGAATAAAT///AGTAGTAAGAAATCCTCAAAGCTGCCGTTGGAATATGGGTGTCTGTATTCCGATCTCGTG
A_73_120394	0.0339649	0.00643239	up	8.52894	8.52894	3.09237		olfactory receptor family 10 subfamily J member 1 [Source:HGNC Symbol;Acc:HGNC:8175] [ENSBTAT00000064894]	TGACTTTGATCATCAGTGTTTTCGTGCTCGTTGTGCCTATGGGTCTGGTCTTCATCTCTT
A_73_P249841	0.0173546	0.000836026	up	8.51225	8.51225	3.08954		Rep: Endonuclease/reverse transcriptase - Sus scrofa (Pig), partial (6%) [TC432766]	TGCTCTGGTTCTCTCCACCTTGTTTTACTTAGACTCTGGTTCAATAAATATGAGCTGATT
A_73_112967	0.0242444	0.00294609	up	8.49655	8.49655	3.08688		Rep: CLRN3 protein - Bos taurus (Bovine), complete [TC419569]	TCAAAATAGAAATGTCATTTTGTGGTGAGTTCTGAAAACCCCATCAGCTGACGCTCTGCT
A_73_112199|532333	0.0444047	0.0108452	up	8.45927	8.45927	3.08053	CAVIN2	caveolae associated protein 2 [Source:HGNC Symbol;Acc:HGNC:10690] [ENSBTAT00000024617]	AACTGATACAGCTATGTCCTTATTTTATAATAATGTACCCCATATGTTATATTGTTGAAC
A_73_100509,A_73_P216562|540196	0.0154863	0.000150844	up	8.22524	8.22524	3.04006	PAX9	Bos taurus paired box 9 (PAX9), mRNA [NM_001192369]	CATCGCTGGCGTTCAAGGGAATGCAGGCAGCCCGAGAAGGTAGCCACTCTGTCACAGCTT///AACAAGATCGGCAACTTGGCCCAACAGGGCCATTACGACTCCTACAAGCAGCACCAACCG
A_73_118484,A_73_P104066,A_73_P069766,A_73_P330406,A_73_P348881|514739	0.016629	0.000686938	up	8.22199	8.22199	3.03949	MAP1B	Bos taurus microtubule-associated protein 1B (MAP1B), mRNA [NM_001206119]	GTGTGCAATATCCCCTCTTCCATTGAGGATATTTGATGTAAAAGAAAAAAGAATCAGTTC///TGAAAAAAGACAAACCTGTGAAAACCGAGACCAAACCTCCAGTGACAGAAAAGGAGACGC///CTCAACATCATGGTTTTAGCAAGCAGCAGCACAGTGGTTATGCAAGATGAATCCTTCCCT///AAACAAGTAAAACTGAAACAGAGGGCTGACAGCCGTGAGAGTTTGAAACCAGCCGCAAAA///AAAGTTTTGTCTCCATTACGGAGCCCTCCCCTAATTGGATCCGAGTCTGCATATGAAAGT
A_73_100415,A_73_P437446|512459	0.0202777	0.00167192	up	7.91593	7.91593	2.98476	GAD2	Bos taurus glutamate decarboxylase 2 (GAD2), mRNA [NM_001205723]	AATAACCTAGCTCACTAAGCTGTTTCAATTCTCTAGGTAGACAATTAAGTTGTCACAAAC///TGACCTTGAAAGAAGGATCCTTGAAGCCAAACAAAAAGGGTTTGTCCCTTTCCTTGTGAG
A_73_P030711,A_73_P248641|768319	0.017028	0.000748969	up	7.90983	7.90983	2.98365	MT1E	Bos taurus metallothionein 1E (MT1E), mRNA [NM_001078134]///LB0041.CR_D11 GC_BGC-04 Bos taurus cDNA clone IMAGE:7961629, mRNA sequence [DT829120]	GTCTCTTACTACCTTGATGCGATACGACATTCCTTTTTCTATGAAATATGTGAATTGCAA///AGACTCTAATTTTGAATGGAGAGTACTGAGGCTCCAGACTATCCTTGTTGTCCTCAGCCA
A_73_P052466,A_73_P309571|540455	0.0205071	0.00172452	up	7.89434	7.89434	2.98082	PIMREG	Bos taurus PICALM interacting mitotic regulator (PIMREG), mRNA [NM_001099109]	GAAGCCAGTGTGTGACTTTCCTGGATCACACTGGTTTTTCATAATAAAGACTCTTTCTGT///CACACACTATTCAGTAGCGATTTCTGCCCTTTGTAAATTATTTAAGAAATCTGCTTTGTC
A_73_105536,A_73_P034641|281983	0.0162755	0.000576464	up	7.88973	7.88973	2.97998	PLAUR	Bos taurus plasminogen activator, urokinase receptor (PLAUR), mRNA [NM_174423]	TTCCCAGCTGTCCAGAGAGAGGGCTGTGAGAACCAGAGGAGAAAAGCTAGCAAAAGCTGC///TCCTGGAGCTTCAAAACCTGCCACCAAACGGCTTGCAGTGTTACAGCTGTGAGGGGAACG
A_73_P046036,A_73_105828|281402	0.0216701	0.00208429	up	7.88625	7.88625	2.97934	PIM1	Bos taurus Pim-1 proto-oncogene, serine/threonine kinase (PIM1), mRNA [NM_174144]	GTAAATGTGTGTACAGTTGGCATGGTAGTGTACAAAAGGATTGTAGTTGATCTAATTCTT///TGTGTTCTGAGCAGCATGTAGCCTGCTGGTTTTATCTGAGTGAAATACTGTACAGGGGAA
A_73_106079|281735	0.014751	3.44429e-05	up	7.84326	7.84326	2.97145	CXCL5	Bos taurus chemokine (C-X-C motif) ligand 5 (CXCL5), mRNA [NM_174300]	GTTAAAATTGTACTTTTTAAATGTATCTCAATGGTTTATAGTGCTTCTTTTGTTCTTTGG
A_73_P033841|507439	0.0155841	0.000161745	up	7.80187	7.80187	2.96382	NMUR2	Bos taurus neuromedin U receptor 2 (NMUR2), mRNA [NM_001035048]	AATGGGAAGAAAGAGAATATGGTGGAAGGTCCAAAGAGTCAACCTACACTACTTATTTGT
A_73_113925,A_73_P116681|506132	0.0155841	0.00021507	up	7.75223	7.75223	2.95461	CH25H	Bos taurus cholesterol 25-hydroxylase (CH25H), mRNA [NM_001075243]	AGCATCTGATCTCTGTAAAAGTGAAGCATGGTCCTGCTGGGCAGTGACTCAGATTATTGT///TGCGCGGTTCCATTTAAGAAAGGTTAGTTTGCGGATCGCTGCTAGTTAGATCAATAGAGC
A_73_113651	0.0161901	0.000503687	up	7.70067	7.70067	2.94498			TGCTGTAATTCTGTCCTGATCATCCTCCTCTTTGGGTTCCCGTTTCCTTTTATATGCGTA
A_73_117641|509786	0.0191469	0.00124722	up	7.59021	7.59021	2.92414	BCL2L15	Bos taurus BCL2 like 15 (BCL2L15), mRNA [NM_001075417]	CTGAAGAAGAGATGGAGCTGTTTCCCAGCCTGAACAGAACTTCTTTGACTGATCAGATGA
A_73_P031396|100125941	0.0156546	0.000296648	up	7.52897	7.52897	2.91245	CLRN3	Bos taurus clarin 3 (CLRN3), mRNA [NM_001105504]	GACCTTCTGACCCGGCCTCACTCTCTTAAGTAATAAAGGCTTGTGTTACACGCCAAAAAA
A_73_P324666,A_73_113698,A_73_P259316|539524	0.0202294	0.0016497	up	7.42838	7.42838	2.89305	HSPB8	Bos taurus heat shock protein family B (small) member 8 (HSPB8), mRNA [NM_001014955]	TCCCCCTTACTCACCGTTTGGAGAGAGCAGTTTCAACAATGAGCCTCCTCAGGACGGCCA///CTAGTGGTGTTGTGTATATGGGTGGGACGTGCGTGTCATTGTTATTTGAATTGTGCTGTT///ATCTTATCTTGCAGCTAATGCAAGAGTTACTTTTCTCTGGGGACCGGGATTCCCATTCTG
A_73_P051021|538846	0.016629	0.000630699	up	7.36483	7.36483	2.88065	JAM2	Bos taurus junctional adhesion molecule 2 (JAM2), mRNA [NM_001083736]	CAGAGCTCACTCACCTGGTATGTGTCCTTGACTTCTTCATTAAACATCATTTTGAGAGTC
A_73_P064616|100295656	0.0161901	0.000503983	up	7.36055	7.36055	2.87981	C19H17orf67	chromosome 17 open reading frame 67 [Source:HGNC Symbol;Acc:HGNC:27900] [ENSBTAT00000049635]	GGGTTTTGGTCATTGCTTTTTTGTCCTCTCTCGTTTTCTGCTCTAATAAATACTGGTGTT
A_73_P326306,A_73_107777|514646	0.0337994	0.00638176	up	7.29528	7.29528	2.86696	LPCAT2	Bos taurus lysophosphatidylcholine acyltransferase 2 (LPCAT2), mRNA [NM_001205797]	AGATCACACCTATGAAGACTGCAGATTGATGATTTCAGCTGGCCAGTTGACACTGCCTAT///TTTTGCTATACTGATTGGCTTACTGGTGAGAAAGGTATTTTTATGGATTTTCCAGGTTAG
A_73_112707|615813	0.0371965	0.0077218	up	7.29105	7.29105	2.86613	ITPKA	Bos taurus inositol-trisphosphate 3-kinase A (ITPKA), mRNA [NM_001083519]	AGAGCTACCTGCAGTTGCAGGACTTGCTCGACGGTTTCGATGGGCCTTGCGTACTAGACT
A_73_117815,A_73_P269226|541175	0.014751	6.98234e-05	up	7.27696	7.27696	2.86334	DUSP10	Bos taurus dual specificity phosphatase 10 (DUSP10), mRNA [NM_001034725]	TTTTGATGCCGTTGAGATTTACTTCCCACCAACTGACAAAGCAGGGAGTCTAAAGAAGTC///ATGACTGTTCTCCATCAGGAGATGAAGAGGAAGGAGTATGGATTCTTTCTTTTCTTTTTT
A_73_116285,A_73_P038186,A_73_P209012|506097	0.0169549	0.00073156	up	7.24444	7.24444	2.85687	NFIL3	Bos taurus nuclear factor, interleukin 3 regulated (NFIL3), mRNA [NM_001075240]	CAGCAGTTGCATTTCTGTCATCAAGCACTCTCCTCAGAGTTCTCTGTCTGATGTTTCAGA///TTATCACTCTGCCTTGTGTATAGTCAAATAGTCCATCGCAAAGACTGTATATATTGAACA///TAATTCTACAGCTGTGTACTTTCAAGACTACCAGACTTCCAAATCCACTGTGAGCGCCTT
A_73_110504	0.015973	0.000350151	up	7.17381	7.17381	2.84274		transducin like enhancer of split 6 [Source:HGNC Symbol;Acc:HGNC:30788] [ENSBTAT00000001533]	CAGCAACCACCTGATCGTCACAGGGTGCAGGGACCACGCCTCGGTGTACCAGCTCACATA
A_73_P445756,A_73_117023|504282	0.0155841	0.000280363	up	7.16731	7.16731	2.84143	PLK3	Bos taurus polo like kinase 3 (PLK3), mRNA [NM_001075153]	TTTTATCACTGAAAACATGGAACTGAAGATGGGGGATTTTGGACTGGCAACCCGGTTGGA///ATTGACATTTATTTATTGGGATGTGAGCCCCACGAAGGGCCTCCTTCTGGGATAATAAAC
A_73_105304	0.0335529	0.00627729	up	7.12877	7.12877	2.83365			GAAAACCTAAGCAGACACGGAGCATTATCAGGATCAGCCACACACGTGTTTCCTTCTATT
A_73_114392	0.0155841	0.000197479	up	7.08656	7.08656	2.82509		276080 MARC 3BOV Bos taurus cDNA 5', mRNA sequence [BF652500]	ATTGACAGCATTTGTAAGTGATTGTGCAATCTTGTGTAATGGTCTTTTGATTCTTTTGGG
A_73_P082152,A_73_P082146|788926	0.014751	5.64832e-05	up	7.08623	7.08623	2.82502	HK2	hexokinase 2 [Source:HGNC Symbol;Acc:HGNC:4923] [ENSBTAT00000060994]	AGAAAATGATCAGCGGCATGTACCTGGGCGAGATTGTTCGTAACATCCTCATCGATTTCA///GAGTTTGGTTCCCAAGCCTTGGCTCTCCTGAGATAAATACAATTTGTTCACACTTTTCAC
A_73_104543	0.0198435	0.00146829	up	7.08038	7.08038	2.82383		PREDICTED: Bos taurus coiled-coil domain containing 180 (CCDC180), transcript variant X5, mRNA [XM_015464564]	ATCATCCAGGGCCTGTACTTGTGACACTCTCAACCCTCCCTAAATAAACGGCTTATTTTG
A_73_P143106	0.0306232	0.0051294	up	7.01824	7.01824	2.81111		1184848 MARC 7BOV Bos taurus cDNA 5', mRNA sequence [DN284561]	CAATAAAAGATTTTGTATCACCTGCTTTGTATCGTCTGCTTGTGCAAATAAAGTTTCCTG
A_73_P080246,A_73_P080251|286815	0.0155841	0.000263057	up	6.87233	6.87233	2.7808	GCH1	GTP cyclohydrolase 1 [Source:HGNC Symbol;Acc:HGNC:4193] [ENSBTAT00000009020]	TGGTTGAAGCAACACACATGTGCATGGTAATGCGAGGAGTGCAGAAAATGAACAGCAGAA///CCTGGAGGGCGGCCACGGCCATGCAGTTCTTCACCAAAGGCTACCAGGAAACCATCTCAG
A_73_P035131|654488	0.0216578	0.00207415	up	6.8687	6.8687	2.78004	OAS1Y	Bos taurus 2',5'-oligoadenylate synthetase 1, 40/46kDa (OAS1Y), mRNA [NM_001040606]	ATCCCAGCCTTGACTTTCTTCTGTGAACCTGAGGGGAAAGGTGATGGTCCAATTTATTGT
A_73_100846,A_73_P101186,A_73_P110031|281308	0.0169719	0.000734232	up	6.80953	6.80953	2.76755	MMP1	Bos taurus matrix metallopeptidase 1 (interstitial collagenase) (MMP1), mRNA [NM_174112]	ACAACTTCAGGAATGTATGAGCAACCACCACTACCATCCTGATACCCAAGGGACAACTTT///AATTTCCAAGATTATAACTTGTACCGGGTGGCAGCGCATGAATTTGGCCATTCCCTTGGA///AACCACCACTACCATCCTGATACGCAAGGGACAACTTTGTTATAAAGTGTTTTACGTTTG
A_73_P094456,A_73_112914|534542	0.0197713	0.00145141	up	6.77135	6.77135	2.75944	KCNH7	potassium voltage-gated channel subfamily H member 7 [Source:HGNC Symbol;Acc:HGNC:18863] [ENSBTAT00000002469]///PREDICTED: Bos taurus potassium channel, voltage gated eag related subfamily H, member 7 (KCNH7), transcript variant X1, mRNA [XM_015462278]	ACAGATTCATCCCTAAGCACTGTAGGAGTCTTGGGTCTTCATAGGCATGTTTCTGATCCT///CCTTCCAAGCAGGAAAGCAGAGGATAAAATTGTTCATGGATGCAACTCAGATGATCCTCA
A_73_P298116,A_73_118686|508692	0.0197036	0.00143342	up	6.75054	6.75054	2.755	OSR2	Bos taurus odd-skipped related transciption factor 2 (OSR2), mRNA [NM_001034328]	TTATCTGCAAGTTTTGCGGCAGACACTTTACCAAATCCTACAACCTGCTCATCCACGAGA///TGTACCTTGTTGGATGCACCTAGGTATGGGAAATGGAAGCCAAATTTATCTTTAAAGACT
A_73_104390	0.016629	0.00065952	up	6.71903	6.71903	2.74825		Rep: Noelin precursor - Rattus norvegicus (Rat), complete [TC402099]	TGGTTTCCAAAGGGAAAGAAATGCTCCTGTGGGCAGCAGTGTGCGGAAAGTACATTTTTT
A_73_P134721,A_73_P074601,A_73_P035216|783871	0.0177178	0.000914153	up	6.67495	6.67495	2.73876	PI3	Bos taurus peptidase inhibitor 3, skin-derived (SKALP) (PI3), mRNA [NM_001080353]	TCAAAGGACAAGATCCAGTCAAAGGTCAAGATCCAGTCAAAGGACAAGATCCAGTCAAAG///CAAGATCCAGTGAAAGGTCAAGATCCAGTGAAAGGTCAAGATCCAGTCAAAAGGCAAGAC///CTTGAGCATGGACTGCCTCCCTCATGGACTTTCCAATAAAAGACTGCTTTCAACTCCAAA
A_73_119332|540061	0.0208006	0.00182495	up	6.64392	6.64392	2.73203	FAM71F2	Bos taurus family with sequence similarity 71 member F2 (FAM71F2), mRNA [NM_001046467]	GCCTTGAGCCACAGTCTCTGGGAACAAGAGAATGCCGATGAGTACCACATACAGGCTCCT
(+)E1A_r60_a104	0.0161901	0.000467134	up	6.59073	6.59073	2.72044		Unknown
A_73_P042321|613798	0.0155841	0.00021651	up	6.57301	6.57301	2.71655	LSMEM1	Bos taurus leucine rich single-pass membrane protein 1 (LSMEM1), mRNA [NM_001099718]	GAATTGTTTGTATTCAAGGGGATCAGGTGATGATTCTTTTCAATAAAAGAGATTCTGCTC
A_73_P044296,A_73_120451|539159	0.0172602	0.000786711	up	6.52886	6.52886	2.70683	CTH	Bos taurus cystathionine gamma-lyase (CTH), mRNA [NM_001024567]	CTACTGGATGATCTAGATCAAGCTTTGAAGGCAGCTAACCCTCCAAATGCAAGTTCCAAC///CAGGTCAATTCTGTTCAGATCTTTTTATTAATTTTGATATACATGTGCCTCTGAAGGAGG
A_73_110658,A_73_P389796|511595	0.0208006	0.00182487	up	6.51759	6.51759	2.70434	PARP8	Bos taurus poly(ADP-ribose) polymerase family member 8 (PARP8), mRNA [NM_001192298]	ATATGGGTCGTCCCAAATACTGATCATGTCTGCACAAGATTCTTTTTTGTCTATGAAGAT///TTGTGGAAAAAGCAAATCTAAACTGAAATCGGAGCAGGACGGGATCTCCAAGACGCACAA
A_73_P122741,A_73_119493|281871	0.023534	0.00269577	up	6.51671	6.51671	2.70414	ISG15	Bos taurus ISG15 ubiquitin-like modifier (ISG15), mRNA [NM_174366]	AGTTCTGGCTGTCTTTTGAAGGGAGGCCCATGGATGATGAGCACCCGCTGGAGGAATACG///GATGATGAGCACCCGCTGGAGGAATACGGCCTCATGAAGGGGTGCACCGTGTTCATGAAT
A_73_114133|507449	0.0294989	0.00471071	up	6.5112	6.5112	2.70292	RASD1	Bos taurus ras related dexamethasone induced 1 (RASD1), mRNA [NM_001206261]	GAACAAGATCTTACCTAAGTGTTTGTACTGCATGTTGAGTCTTTAAAGTTATCGTTACTG
A_73_P088621	0.0188405	0.00115895	up	6.50086	6.50086	2.70063		anillin actin binding protein [Source:HGNC Symbol;Acc:HGNC:14082] [ENSBTAT00000046371]	CTTAAGAGCATCAGATTTGCTGGTTGCATTTTATGCTTTAAATACAAAAGGATATGTGCC
A_73_103276|504548	0.0445099	0.0108946	up	6.47175	6.47175	2.69416	LOC504548	PREDICTED: Bos taurus ubiquitin D-like (LOC504548), mRNA [XM_580689]	TCTCATATGACTCAATAATCATTGAGTCAAACTGACACTCTGCCTGTAGACAATAGTGAA
A_73_102781	0.0397973	0.00884981	up	6.34707	6.34707	2.66609		Rep: Expressed protein - Cryptococcus neoformans (Filobasidiella neoformans), partial (4%) [TC406643]	CCTCAGCCATCTAATCCCCAAGCTTTCTCTCTGACTGGTTTTCTTTCCTTTGATTAAATG
A_73_113043	0.018953	0.00119578	up	6.31634	6.31634	2.65909		Rep: Beta-2-microglobulin precursor - Bos taurus (Bovine), partial (31%) [TC455884]	CTCTTGCATTGCTTAGTTGCCTGTGTGTCAAAATACCTTGTGGACGTTGAAAACTATTTG
A_73_P334656,A_73_P422111,A_73_110185,A_73_P270481|505080	0.0154489	0.000124873	up	6.30272	6.30272	2.65597	TGM3	Bos taurus transglutaminase 3 (TGM3), mRNA [NM_001101848]	AGAAGAAATAGAGCACCCTGTAAAGATCGCATATGCTCAGTACGAGAAGTACCTGAAGGC///ACTAAATCCCTGAATCCCGAAGAAGAAATAGAGCACCCTGTAAAGATCGCATATGCTCAG///CCCTGGGTCATTGTGGAGGTGCGGGGGATGATGGTTAGCCATCCATTGTGACACTCACAA///AAACGATCCCAAATATGTTGGCCGGGTTCTCAGTGCAATGATCAATGGCAATGATGACAG
A_73_P365411,A_73_P340631,A_73_112202|526331	0.0155841	0.000280398	up	6.26541	6.26541	2.64741	GALNT16	Bos taurus polypeptide N-acetylgalactosaminyltransferase 16 (GALNT16), mRNA [NM_001101127]	TGATTGACAAGTCCTGGTTTAACCACTTGGGAAAGTATGATGCTCAGATGGACATCTGGG///TTGGGACGGGAATCTTGGGCCTCTCTTACTGAAAGTAAGAGGACTGCCATTCAGCCTTTC///TGATTGGACCGGGCTCAGCACCTGTCAGCCTCCTTTGGGACTCAGCCCTGTTCTGTTTTT
A_73_100504	0.0307519	0.00517055	up	6.25424	6.25424	2.64483		Rep: Chromosome undetermined scaffold_140, whole genome shotgun sequence - Paramecium tetraurelia, partial (6%) [TC425668]	GAAACATCTGGGCTTTATTCTTCAAGCGTTGGAGGTTGATGTGTCCTGTCAAGGGGTAAA
A_73_117692	0.047047	0.0120274	up	6.22114	6.22114	2.63718		Rep: Predicted protein - Monosiga brevicollis MX1, partial (6%) [TC434229]	GGCCAGGGACTATGAGGCTTTGGTTAAAAGAGTTTTCTTGGACCAACTTTCTTCTATGGT
A_73_103456,A_73_P458976,A_73_P115791|617914	0.0173221	0.000826229	up	6.22016	6.22016	2.63695	MAFF	Bos taurus MAF bZIP transcription factor F (MAFF), mRNA [NM_001103300]	TTTTCTGACTTACAGTAAGCGAGTTATCCGCCTTCTGTATTTTGTAGACTTCCTGAATAA///GTACCTTCTGCGAACATGTCTGTGGATCCCTTATCCAGCAAAGCGCTGAAGATCAAGCGT///TTATCCAGCAAAGCGCTGAAGATCAAGCGTGAGCTGAGCGAAAACACGCCGCACCTGTCG
A_73_104677|614675	0.0154489	0.000125064	up	6.17983	6.17983	2.62757	PDLIM1	Bos taurus PDZ and LIM domain 1 (PDLIM1), mRNA [NM_001035455]	CTCTGCTGCAAATGGACATCAGCCAAATTCAAACCAAACTGAATTTAATATGTCTGATGA
A_73_P084571	0.0176711	0.000909048	up	6.15755	6.15755	2.62236		transducin like enhancer of split 6 [Source:HGNC Symbol;Acc:HGNC:30788] [ENSBTAT00000001533]	ACCTGCCTGGACATCCGAACGGTGCCAAGAGCATTGCTGTTAAAGACCAGCACGTCTGGA
A_73_P304291	0.0450742	0.0111596	up	6.13213	6.13213	2.61639		Hw_loin_66_050829_D04 Bos taurus CF-24-HW loin cDNA library Bos taurus cDNA, mRNA sequence [DV793344]	TCTGTGGTATTTGTGACAAAATGGGAAGAAGAGACATAGTGATTAAGGCCTAGTTGGTGG
A_73_101638	0.0161901	0.000439197	up	6.0951	6.0951	2.60765			GACAGCAACTTCATAGTTGGAGAATGATGTCTCTTCAAACTGCTTTTGATAAGCAGAAGA
A_73_P101016,A_73_103048,A_73_P101211|281914	0.0161901	0.000476122	up	6.07845	6.07845	2.6037	MMP13	Bos taurus matrix metallopeptidase 13 (MMP13), mRNA [NM_174389]	TATGCTTCCTGATGATGATGTCCAAGGGATTCAGTCTCTCTATGGTCCAGGAGATGAAGA///TGGAAAGCATTTGAGATAACACTTCCAGACATTTGGGGGGTGAGTTATGGGAGAAGGAGA///TGCATCCTCAGCAGGTTGAAGCAGAGCTGTTTTTAACAAAATCGTTTTGGCCAGAACTTC
A_73_103044,A_73_P455571|282599	0.0161901	0.000500737	up	6.05801	6.05801	2.59884	LRRC25	Bos taurus leucine rich repeat containing 25 (LRRC25), mRNA [NM_174688]	CTAGAAGGGGAGGAGAGACCCCAATGCGGATGGGGATGGGAGAGTCAATTTGTGAACTCT///AGACATCGGATGGACCAGAACCTGAGCAAAACCTGGGCTTCTCAGGATGGCTCCAGGTCT
A_73_P107666,A_73_P049591,A_73_100958|327712	0.0474928	0.0122138	up	6.04319	6.04319	2.59531	CCL5	Bos taurus C-C motif chemokine ligand 5 (CCL5), mRNA [NM_175827]	CAACCCAGAGAAGAAGTGGGTGCGAGAGTACATCAACGCTTTGGAGTTGAGCTAGGGTGG///AACCTGAACTTGCGCCAACTTTGCTTCTCGCTCTTGTCCTAAGCAGCTTGGGAGGCTCCC///CCCCATCTCGGTCCCTCACTGGGGAGGGCTGCACTGGCAAATAAGAAGAAATCAGCTGTT
A_73_P047286|282521	0.0155841	0.000254979	up	6.03411	6.03411	2.59314	SERPINE2	Bos taurus serpin family E member 2 (SERPINE2), mRNA [NM_174669]	TTTTTCATCCGACATAATCCTACAGGTGCTGTCTTATTCATGGGGCAGATAAACAAACCC
A_73_114743|282005	0.0155841	0.000255432	up	5.99419	5.99419	2.58356	PROCR	Bos taurus protein C receptor (PROCR), mRNA [NM_174437]	AGATTTGGGAAGAGACACTGGTGCAATAGAGGTAGTGGTAACCAGAGAAATGATGAAAGT
A_73_112230,A_73_P307936|281357	0.0398834	0.00890148	up	5.97	5.97	2.57773	NPR2	Bos taurus natriuretic peptide receptor B/guanylate cyclase B (atrionatriuretic peptide receptor B) (NPR2), mRNA [NM_174126]	GCAGTAGCCATCATCTCTCCACACATCAGAAGTGGACATTGTCACATGAGATGGAAATCA///TTTCTCCATAACAGCATTATTGCATCCCATGGGAGTCTCAAGTCCTCAAACTGTGTGGTG
A_73_P091466	0.014751	6.4143e-05	up	5.95558	5.95558	2.57424		PREDICTED: Bos taurus antigen WC1.1-like (LOC101907335), mRNA [XM_015463495]	GCCTCAGATATTCTAATTGCCTGTATTTCAATAGAGTAATGCTGACCTGTAATTTTGTCA
A_73_118494	0.0154489	0.000131004	up	5.9516	5.9516	2.57328		Rep: Uncharacterized protein C18orf30. - Canis familiaris, partial (9%) [TC424430]	TGGGATGCCACAGGCAGGGTCTATCTGTGTGCTCTTGTTTTCTTTGTTAACGGTTTTGTT
A_73_P086951|510535	0.0486605	0.0127937	up	5.86515	5.86515	2.55217	FSD1L	Bos taurus fibronectin type III and SPRY domain containing 1 like (FSD1L), mRNA [NM_001192260]	TACTAATCGCAGCAGTTTACAAGTGGTGGAAGTCAGGTTTGCTACCTTCTGCTCTAAGGT
A_73_P451571,A_73_106673|504939	0.014751	4.53657e-05	up	5.84147	5.84147	2.54633	GADD45G	Bos taurus growth arrest and DNA damage inducible gamma (GADD45G), mRNA [NM_001045901]	AGACCTGCACTGTATCCTCATTTCGAACCCCAATGAGGACGCATGGAAGGACCCCGCCTT///TACGGGCACTGCTTCATTTTCTAAAGGACTATGCTGCTGCAGCTTTGAGTTTTACAATAA
A_73_P089886	0.0161901	0.000529806	up	5.81646	5.81646	2.54014		PREDICTED: Bos taurus antigen WC1.1-like (LOC101907335), mRNA [XM_015463495]	AGTGACTTTCTCATGATGCTGTATTAACTAGGAGATGAAGCCTCAGATATTCTAATTGCC
A_73_110222|517587	0.0204299	0.00171169	up	5.80321	5.80321	2.53685	INHBE	Bos taurus inhibin beta E subunit (INHBE), mRNA [NM_001205842]	TCTACCTTGACCGTGATGGCAACGTGGTCAAGACAGATGTGCCGGATATGGTGGTAGAGG
A_73_P066906|618400	0.0324717	0.00586358	up	5.77463	5.77463	2.52973	GPT2	Bos taurus glutamic pyruvate transaminase (alanine aminotransferase) 2 (GPT2), mRNA [NM_001193187]	TAAAGACGGTTCTACAGAAGGTGAAGGACTTTCACATAAAGTTCCTGGAGGAGTACGCGT
A_73_P042221,A_73_116098|281386	0.02412	0.00290097	up	5.7455	5.7455	2.52243	SERPINF1	Bos taurus serpin family F member 1 (SERPINF1), mRNA [NM_174140]	TTTCATCTTTGTACTGAGGGACACAGACACAGGGGCCCTTCTCTTCATAGGCAAAATTCT///AAACACTAGAGGGATGGCAGATTATATATTATACGAAGGCTGCCCCTACATTTCAATGTA
A_73_102351,A_73_P327121|529235	0.015973	0.000373624	up	5.73579	5.73579	2.51999	DDIT4	Bos taurus DNA damage inducible transcript 4 (DDIT4), mRNA [NM_001075922]	TACATGAAGATACTCGCTGTTCATGAATACACTTGATGTTCAAGTATTAAGACCTATGCA///TCTTTGTTTTTGTTTTTTGATCATAGCTTCACTACTGACCTGTTCGAGGCAGCTATCTTA
A_73_P044606|280981	0.0155841	0.000275189	up	5.70313	5.70313	2.51175	PLIN2	Bos taurus perilipin 2 (PLIN2), mRNA [NM_173980]	AGGAGTCTTTAGATGATGTGATGGATTATCTTGTTAACAACACACCCCTCAACTGGCTGG
A_73_107919,A_73_P296451|512098	0.0188743	0.00118063	up	5.67242	5.67242	2.50396	CES1	Bos taurus carboxylesterase 1 (monocyte/macrophage serine esterase 1) (CES1), mRNA [NM_001075554]	GAGTGGGAGAGGTCAGGGAGGGGGAGTTTCTGTTTCTGTGGCCTCGATTTGGAAATAAAC///AAGACTGTCTTTACCTAAATATATACACCCCTGCTGACTTGACGAAGAGAAGCAGGCTGC
A_73_115943,A_73_P338101,A_73_P368881|540245	0.0202777	0.00166938	up	5.65976	5.65976	2.50074	NR4A2	Bos taurus nuclear receptor subfamily 4 group A member 2 (NR4A2), mRNA [NM_001076208]	TGTTACGTGGGTGGCATGAGTTGAAGAAGGCAAAGGCTTGTAAATTTATCCAATGCAGTT///AGAGTTTGTCAAGTTTAGCATGGACCTCACCAACACTGAAATCACTGCCACCACTTCTCT///TTCTAAGACCTCCTTCCATGCACTTCAGAGAAACTGGAAAGAAACCTAAAACTGTCCAGA
A_73_P109021,A_73_P037986,A_73_111056|281055	0.0396692	0.00880111	up	5.63147	5.63147	2.49351	CD3G	Bos taurus CD3g molecule (CD3G), mRNA [NM_001040472]	GAAGTAGTACCAAAGACCCTCGAGGAATATATAAATGTGAAGGATCAAATAACCAATCAA///TCTTCACTGAAATCGTCAGCATTTTCCTCCTTGCTGTTGGGGTCTATTTCATTGCTGGAC///CAGCCACCTGAGGAAGAACTGAACCCAAGACTCAGAGAGATTTGCCTTTTCTGGAAAAAT
A_73_P178337,A_73_108889|539464	0.0201342	0.00160645	up	5.60779	5.60779	2.48743	PCDH18	Bos taurus protocadherin 18 (PCDH18), mRNA [NM_001102229]	CTTGTAATATGAGAGGTGTCCCAAGGAAATAGAATCTTGTCCTTTAAATGGATAACTGTA///TCTCTGTGTGGAATGCCTTGGTAAGGGACATTGGTGTTATGACTGTTCTCGTTTATGACC
A_73_P073241,A_73_101019,A_73_P283071,A_73_P082986|281365	0.0156692	0.000304059	up	5.53916	5.53916	2.46967	ODC1	Bos taurus ornithine decarboxylase 1 (ODC1), mRNA [NM_174130]	TTACTGCTGCTTCTACCTTCAATGGATTCCAGAGACCCACCATCTACTATGTGATGTCAG///CACCAATGTGGAAGACTGGGAGATGGGGTCACACTTATCTGTGTTCCTATGGAAACTATT///AAAGAGCTAGATATTGATGTCATTGGTGTCAGCTTCCACGTGGGAAGTGGCTGTACTGAT///ATGCTCTTTGAGAACATGGGTGCTTACACTGTTGCTGCTGCTTCTACCTTCAATGGATTC
A_73_P388156,A_73_104548,A_73_P253101|505727	0.0230447	0.00249341	up	5.5061	5.5061	2.46103	NOV	Bos taurus nephroblastoma overexpressed (NOV), mRNA [NM_001102382]	GTACCGATGCCCCAAACTTATCCTTGGGTCTTAGTTAGGCAAACTCATGAACAAGATATA///AGACTGCAAACTTAAATGTATACATCCTTCTATTGTCACCCTATGTGTTCAGCTTTTCTC///AGTGACTCAACTCTGAACTTCAAATTCTGAGATCTGATGAAACATATAGTTCTCCAACTT
A_73_P089866	0.0154489	0.000116212	up	5.50594	5.50594	2.46099			AATGACTTTCTCGTGATGCTGTATTAAATATGAGATGAAGCCTCAGATATTCGAATTGCC
A_73_P055456	0.045738	0.0114406	up	5.48187	5.48187	2.45467		Rep: Nuclear receptor ROR-alpha - Homo sapiens (Human), partial (32%) [TC424720]	CCATGGCAGAACTAGGTAATGGCTTCTGTGTTTCCATTGGGATGTACTACTGATGCCTTT
A_73_P038251,A_73_P262576,A_73_P369076,A_73_102507|282291	0.0161901	0.000516025	up	5.436	5.436	2.44254	NFKBIA	Bos taurus NFKB inhibitor alpha (NFKBIA), mRNA [NM_001045868]	GTCTGACGTTATGAGCTTCAGAAAGAAGCTAAAAGAACATGGACTTGTATATTTGTACAA///AGGTGTGTGTTCCCCTCCTGTAAATAGTGTACATAGTGTATTTTGTCAGTAATTATTTTG///ATTGAAGTGTGGGGCTGATGTCAACAGAGTCACCTACCAGGGCTACTCCCCGTACCAGCT///GTGGGGTTAAAAGTCACTACCTGTCAAGGTGTGTGTTCCCCTCCTGTAAATAGTGTACAT
A_73_P050391,A_73_P346001|508893	0.034331	0.00657274	up	5.43559	5.43559	2.44244	TLE4	Bos taurus transducin like enhancer of split 4 (TLE4), mRNA [NM_001081583]	CTTCAGCTATCTACTTGGAAGATCATGGATAACCCTACTTAACAGTGAAAGGAATCTTTA///TTAACGAAAAATCTACTACTCCTGTGTCGAAGTCCAATACCCCTACTCCACGAACTGATG
A_73_P154447,A_73_117932|767924	0.0152818	0.000102116	up	5.41571	5.41571	2.43715	SMIM3	Bos taurus small integral membrane protein 3 (SMIM3), mRNA [NM_001244119]	TTGATCAGCTTTGAAGAACCATAGGCCCTTATTACTGATGAGAGCCTTCAAGGTGGTGAG///AAACCAGGAGCATCTGGAGATTGGTTAAATTATGTAAGAAGATAGCACAGGTTATCAGGA
A_73_115733|517539	0.0169719	0.000733664	up	5.35943	5.35943	2.42208	MTHFD2	Bos taurus methylenetetrahydrofolate dehydrogenase (NADP+ dependent) 2, methenyltetrahydrofolate cyclohydrolase (MTHFD2), mRNA [NM_001075755]	AAGATCCCATAACTGCTAAACCCAAGTTGGTTGGAGATGTGGATTTTGAAGGAGTCAAGA
A_73_101598|510080	0.0173221	0.000832767	up	5.33923	5.33923	2.41663	ANTXR2	Bos taurus anthrax toxin receptor 2 (ANTXR2), mRNA [NM_001076826]	CTTGAATCTTTTGCTCGAGTTTATTTATGTCACTGGCTGGCTGGATCCAAAGTCATGTGT
A_73_100366,A_73_P257646|526006	0.0180999	0.000982572	up	5.33637	5.33637	2.41586	ENO2	Bos taurus enolase 2 (ENO2), mRNA [NM_001101125]	CCCCGTGCCATGTTTCACAGCTGCCAGCACCTCTGTGGCGCTGAAATGAACACTTCCATT///TTACCGCGATGGCAAATATGACTTGGATTTCAAGTCTCCTGCTGATCCTTCCCGATACAT
A_73_120664,A_73_P313246,A_73_P349896|534591	0.022286	0.00223359	up	5.32811	5.32811	2.41363	KCNN4	Bos taurus potassium calcium-activated channel subfamily N member 4 (KCNN4), mRNA [NM_001076905]	TCCGGGAGCAAGTGAACTCTATGGTGGACATCTCCAAGATGCACATGATCCTGTGCGACC///GCCAGGGTGCAGCCCACCAGTTTCTGCTCTTATACTTTGCAATAAATGTTAAACAAAGCC///AGCATGTGCACAACTTCATGATGGATATTCAGTATGCCAAAGAGATGAGGGAGTCAGCTG
(+)E1A_r60_3	0.0169822	0.000741318	up	5.28089	5.28089	2.40078		Unknown
A_73_P102786,A_73_104912|513746	0.0299904	0.00490445	up	5.27894	5.27894	2.40025	SERPINA6	serpin family A member 6 [Source:HGNC Symbol;Acc:HGNC:1540] [ENSBTAT00000023402]	TCTTCGACGACTTCACGTGGAGCAGCCTCTTCCTGGGCAAGGTTGTGAATCCGACCTAAG///CACAGAAAGGGGTGGGAGGGCTCCCCCTAATCCTCCCCAGGTTCCCCTCTTGTAATAAAT
A_73_106231	0.0202777	0.00167323	up	5.26907	5.26907	2.39755			GGGCATTCTCACTTTCCTGTTTGTTATAACTCGAGGTGATGTCATTGTGTATTTATCCCT
A_73_119273	0.0476897	0.0123076	up	5.26713	5.26713	2.39702			CCAGTGCCACTGCCAAAGAAGTGGTGTTTTCATTTTGTATCTTCTCCTATTGTTGTTCCC
A_73_P038796,A_73_P353841|514346	0.0359623	0.00723974	up	5.26122	5.26122	2.3954	SDS	Bos taurus serine dehydratase (SDS), mRNA [NM_001075662]	TATGAAGGTTTATCGGGAACATCCCATTTTCTCTGAAGTTGTCTCGGACCAGGAAGCTGT///TCTGGGAAGGCCACTCTTCCATCGTGAAGGAGCTGAAGGAGACGATGACCGAAAAGCCAG
A_73_P374401,A_73_P447551,A_73_P082546|514255	0.016629	0.000690884	up	5.23992	5.23992	2.38955	SLC20A1	Bos taurus solute carrier family 20 member 1 (SLC20A1), mRNA [NM_001191185]	GCTTTGCCAGTGTTCTATGCTTGCACGGTTGGAATCAACCTCTTTTCCATCATGTACACT///ATCACACCGTGCACAAAGACTCTGGCTTGTACAAAGAGCTCCTCCATAAGTTACATCTTG///CTTGTGCTCTAACTGCTTTCGTGCTAAATATGACTTGTCTCAAAACTAGCTATGTAAAAT
A_73_113268,A_73_P285541|444863	0.0253855	0.00333224	up	5.226	5.226	2.38571	GYPC	Bos taurus glycophorin C (Gerbich blood group) (GYPC), mRNA [NM_001002886]	AACAGCAGGTGCCAGAGCTCCAAGGCACCTTTGTCTCCCGTAGATGCAGCTCTGATTGGA///ACAACGGTGGCAACAGCAAAAAGGAGTACTTTATCTGAAGGACTTTACCAGGACTCAGCT
A_73_P206072	0.0154489	0.000138349	up	5.21027	5.21027	2.38136		Rep: Peptidase S1 and S6, chymotrypsin/Hap precursor - Methylobacterium sp. 4-46, partial (7%) [TC412565]	AGAGGCAGATTTGCATATCAGGTATATCCAAAAGAGATACTAGCGTTGTGTTAAAAAGTT
A_73_P034831|512660	0.0225006	0.00232385	up	5.19187	5.19187	2.37626	SEMA3C	Bos taurus semaphorin 3C (SEMA3C), mRNA [NM_001101082]	CTTAATGTTGTCTTAAGTGGGACTTATGCTTCCATTAATAAAGGTCTGTCTTCAATGATC
A_73_P041896,A_73_108911|617851	0.0319545	0.00565731	up	5.18392	5.18392	2.37404	PADI2	Bos taurus peptidyl arginine deiminase 2 (PADI2), mRNA [NM_001105452]///peptidyl arginine deiminase 2 [Source:HGNC Symbol;Acc:HGNC:18341] [ENSBTAT00000004411]	GGTTTGTATGTTGTTGCTGTGGCCAGTAAATGTTTAACCCAATAAATCTGAAATTTTAGC///TTCTTCCCAAACATGGTGAACATGATCGTACTCGACAAGGACCTGGGGATCCCCAAGCCG
A_73_113782	0.0292958	0.00465152	up	5.17052	5.17052	2.37031		Rep: Uncharacterized protein ENSP00000342501 - Homo sapiens (Human), partial (92%) [TC431824]	AAATCACAGGAACCACTACTTTCTAAAGGCCACCATGTCTTTGGGGAAGAAAGATCTACT
A_73_119456,A_73_P387291,A_73_P343236,A_73_112061|616148	0.0475191	0.0122255	up	5.16199	5.16199	2.36793	LBH	Bos taurus limb bud and heart development (LBH), mRNA [NM_001099152]	GATGAACCTCCTGTAACTTCTATCTGTTCTTTTTTGAGGCTCAGGGAGAAACTAGCATTT///TATTATTTTTTGCTGGTCGCTAGATCCCTTTGTATGACCACATGGAGTCTGAGCAGGCCA///TGATCTGGAGGTTTTTTAAGAGGCTGCACTTTTGAGCGTTCCCCTGATTATCCTCTTTGC///AGGAGTTCTTGGTCCAGGAGGATGCGCAGGACAACTGTGAAGAGACAGCGAGTGAAAACA
A_73_P071821,A_73_120143|506390	0.0236106	0.00271932	up	5.16164	5.16164	2.36783	EXO1	Bos taurus exonuclease 1 (EXO1), mRNA [NM_001304987]	GAGTCCTGTTTGGAAATGAGGCCATTCTGAAAGATTTGTTCTTAGATCTATGCTATTTAT///GTAGTTGGAAGGGTTAAAGATCACTGCATAAATGGGACAGTGCTCTGTCATCCCTGAAGA
A_73_P066991,A_73_106102|282363	0.0223893	0.00227967	up	5.11148	5.11148	2.35374	SLC6A2	GB///Bos taurus solute carrier family 6 member 2 (SLC6A2), mRNA [NM_174608]	GCAGAGTTCTCTGTCTGTAAAAGCAAGGGTTGAATCAGAGAATTGAAGGTCTCACCCAGT///GGTTTCTTATACTCTCGGAAATCTAGATTTGTGGGTTCTTGTTCTGACTGTGAGAGGCCC
A_73_P161142	0.0256367	0.00343748	up	5.0957	5.0957	2.34928		Rep: Nucleosome-binding protein 1 - Homo sapiens (Human), partial (18%) [TC418218]	TCTCCAGAAGTTTTTCATCTTGCAAATGTGAATCTATACCCAAGAGCAATTTCTTTCCAT
A_73_P205107	0.0234419	0.00266867	up	5.09547	5.09547	2.34922		Rep: Bromodomain containing 2 - Homo sapiens (Human), partial (20%) [TC410911]	ATGAGGTTTATGACGTCATCGCTTCCGCCGACCAATAGAAAACGCTCCCGCGGAGAGGTG
A_73_120869|518768	0.0201272	0.00159831	up	5.07978	5.07978	2.34477	POM121C	Rep: PREDICTED: nuclear pore membrane protein 121 isoform 3 - Macaca mulatta, partial (30%) [TC415327]	CCAGCCAGACCACGTCCTTTGCCTTCAGTGTGACCAGCACGCCGGACAGCAAACCTGTGT
A_73_109273	0.0155841	0.000262677	up	5.07175	5.07175	2.34248			TAGTTTGGTGGAGTGCATTAGCTTTACCTGTAATGTTTGATGTTTTTGAGTATGCATTCA
A_73_102040,A_73_P100681|513497	0.0110645	5.91948e-06	up	5.0657	5.0657	2.34076	CDKN1A	Bos taurus cyclin dependent kinase inhibitor 1A (CDKN1A), mRNA [NM_001098958]	TTCAAAGCCCCACCCACAGTGCTGAGTATACAGCAGGTGCTCAATAAATATTCCTGATGA///TGCACCCTCGTGACTCGCTCCCCCGAGCGGCCCGAGGGGACCCCCGGTGGGCCTGGCGCC
A_73_P284116,A_73_107683|533681	0.016629	0.000662676	up	5.05925	5.05925	2.33893	TMEM156	Bos taurus transmembrane protein 156 (TMEM156), mRNA [NM_001083469]	TAAATATGAACCTACATCTACCCTCTTACGAGGAAGTGATTTCTGAGAAAACTACGAACA///GTTGGTTGTTTATACATTTGCTTGCATCTGTAAATCTTGCCTCTTTTCGGCACTGAGATG
A_73_101439	0.0359511	0.0072307	up	5.03872	5.03872	2.33306		C0009283O15.P1KAM13F KN510 Bos taurus lymphocytes [FE006181]	TGTTACCGTCTACATACCAACTCTGCCTTTCTGACAATAAATACACCTGACCCTGGAGAA
A_73_105952	0.0220688	0.002179	up	5.03292	5.03292	2.3314		Rep: MSTP078 - Homo sapiens (Human), partial (15%) [TC424028]	GAATGACAACGTTAATATTGCTTTATGAAATACCAGTCTGTTCTTTCAGAATCCAGAAGC
A_73_P271891	0.014751	5.47679e-05	up	5.02967	5.02967	2.33046		Rep: Peptidase S1 and S6, chymotrypsin/Hap precursor - Methylobacterium sp. 4-46, partial (7%) [TC412565]	TGTCTCATGTAATTTGCATTACATTGGTGGGTTGTTCTAGTACTGTATTTGGCTTCTTCT
A_73_P057971,A_73_119537|540893	0.0240803	0.00289205	up	5.01972	5.01972	2.32761	HS3ST6	heparan sulfate-glucosamine 3-sulfotransferase 6 [Source:HGNC Symbol;Acc:HGNC:14178] [ENSBTAT00000025630]///PREDICTED: Bos taurus heparan sulfate (glucosamine) 3-O-sulfotransferase 6 (HS3ST6), mRNA [XM_613603]	ACAAGCACTTCTACTTCAATGCCACCAAGGGCTTCCCCTGCCTTAAGAAGGCGCAGGGCA///AGCTCAGTGATCTTAATTTATGCCCATCACCCGGCCAGAGCAGACTCTGGGCACACGCTG
A_73_P030646,A_73_P089871,A_73_119299|338056	0.0193632	0.00131368	up	4.99619	4.99619	2.32083	CD163L1	Bos taurus CD163 molecule-like 1 (CD163L1), mRNA [NM_176651]	ATGAAAATTATGATGATGCTGAAGAAGTACCAGTGCCTGGAACTCCTTCTCCCTCTCAGG///TAGATTTAATTCAGTGTCGGAAAATGGATACCTCTCTCTGGCAGTGTCCTTCTGGCCCAT///ATGAGATGAAGCCTCAGATATTCTAACTGCCTGTATTTCAGTAGAGTAGTGCTGACCTGT
A_73_P248671,A_73_106202,A_73_P248516,A_73_P190092|282386	0.0162755	0.000577335	up	4.98765	4.98765	2.31836	TMSB4X	Bos taurus thymosin beta 4, X-linked (TMSB4X), mRNA [NM_001002885]	GTAAAAAGCTGGTCCAAGGTGTTCTGCGGACTGTAAAATGCAGTTTAATTGGAGTGCCAT///AAAGCTGGTCCAAGGTGTTCTGCGGGCTGTAAAATGCAGTTTAATCAGAGTGCCATTTTT///GCGGGCTGTAAAATGCAGTTTAATCAGAGTGCCATTTTCTTTTGTTGTTCAAATGATTTT///CTGTAATCCTATGTTACGCTATACTGAATACGCATCTTCACCCGCTCCATCTTTTTTCTT
A_73_102106|529382	0.0493138	0.013048	up	4.96406	4.96406	2.31152	CACNG5	Bos taurus calcium voltage-gated channel auxiliary subunit gamma 5 (CACNG5), mRNA [NM_001205962]	CTCCCTGCAGATGAACAGCAGCTACCCGGCGCTGCTCAAGTGCCCAGACTACGACCAGAT
A_73_P099971,A_73_P099051,A_73_114897,A_73_P034851,A_73_P100056|326598	0.0155841	0.000253105	up	4.93598	4.93598	2.30334	LGALS1	Bos taurus galectin 1 (LGALS1), mRNA [NM_175782]///BP109087 ORCS bovine utero-placenta cDNA Bos taurus cDNA clone ORCS12790 3', mRNA sequence [BP109087]	AACTACCTGTCTGCAGGTGGTGACTTCAAGATCAAGTGTGTAGGCCTTTGAGTGACATAT///TGAAGGAGATGCATACCTCCACGACACTTCCAGGCTGGAAGGGGAAGGCAGATTCCCTCT///TACCTGTCTGCAGGTGGTGACTTCAAGATCAAGTGTGTGGCCTTTGAGTGACATATGGGC///TCAAGTGTGTGGCCTTTGAGTGACATATGGGCCAGCCAGCCCATGGCCCCAATAAAGGCA///TGCCTGATGGATACGAATTCAAGTTCCCCAACCGCCTCAACCTGGAGGCCATCAACTACC
A_73_P172092	0.0190141	0.00122613	up	4.928	4.928	2.301		454961 MARC 1BOV Bos taurus cDNA 5', mRNA sequence [BI541291]	GTTAGTTTGGAAGCTGTCCTTTCTGTCAAAACAAGGATGATACAACCGCGCAGTAATGAC
A_73_P091496,A_73_P091506,A_73_P089856,A_73_P107766|783109	0.0154489	0.000132706	up	4.90976	4.90976	2.29565	WC1	Bos taurus BoWC1.1 (WC1), mRNA [NM_001281899]	CTGCTCAGATGGAGAGCAGAGTGCAGAGCCTTATCCAGCTATGAAGATGCTCTTGCTGAA///TGGAGAGCAGAGTGCAGAGCCTTATCCAGCTATGAAGATGCTCTTGCTGAAGCTGTGTAG///TATCCAGCTATGAAGATGCTCTTGCTGAAGCTGTGTATGAGGAGCTCGATTACCTTCTGA///TGATGAAAATTACGATGATGCTGAAGAAGTACCAGTGCCTGGAACTCCTTCTGCCTCTCT
A_73_120610	0.0482055	0.012564	up	4.88533	4.88533	2.28846		LB0289.CR_G20 GC_BGC-28 Bos taurus cDNA clone IMAGE:8223022, mRNA sequence [DV915946]	GCATCTGTGTTCTGGGCCTCATCTTGACTCTGCCCAGATCGCTCTAATTTTATACACAAA
A_73_107137	0.0161901	0.000474815	up	4.87203	4.87203	2.28452		4079280 BARC 9BOV Bos taurus cDNA clone 9BOV14_A01 5', mRNA sequence [CK964716]	GTCCTGCCTTGACGAGCACCGTGTTAAAACCTCCTCATATTGTGATGATTGGGCATTAAA
A_73_117737|516026	0.014751	7.37903e-05	up	4.84823	4.84823	2.27746	GPRC5A	Bos taurus G protein-coupled receptor class C group 5 member A (GPRC5A), mRNA [NM_001034515]	ACACACGGGCAGGGGGTTGTTTCTTGTAAAATAAGTTATTCGCCATTCTTCCCTCCAGAT
A_73_105006,A_73_P273901,A_73_P090191|528390	0.018953	0.0011943	up	4.83314	4.83314	2.27296	NR4A1	Bos taurus nuclear receptor subfamily 4 group A member 1 (NR4A1), mRNA [NM_001075911]	TCCTACTTGCTCTCTTCCTGCCCTCCTTCCACGTGTACATAGACTCACTCTAGGAGGAAG///TTTATCCTCCGTCTGGCCTACCGGTCTAAACCAGCCGAGGGGAAGCTCATCTTCTGCTCA///ATGCTGTAAATAAGCCGAATGCTGCTGTAAATACAGGAAGGAAGAGGTTGAGGTGGGAGT
A_73_P127001,A_73_P043721|538827	0.0206326	0.00177381	up	4.82924	4.82924	2.2718	APOLD1	Bos taurus apolipoprotein L domain containing 1 (APOLD1), mRNA [NM_001101180]	GTTTTGATAGTGAAAGATCATTCATCCTCTTTTGTGTCTGTTATAGAGATGGGAGCCTCC///GGGGTATTTAGATTACAAGTGTACTTCAGAACAATATCCGAGTTGGAAAAATAAACACGT
A_73_P041651|774023	0.0307702	0.00518512	up	4.82157	4.82157	2.2695	INSL6	Bos taurus insulin like 6 (INSL6), mRNA [NM_001077521]	AAGCATCAGCAGTTGTGACTGAGATATACTAACCATCATGAGACTTACACTAACTTAATA
A_73_P119681,A_73_119893|508861	0.0161901	0.000515927	up	4.81864	4.81864	2.26863	SAT1	Hw_liver_30_050721_F07 Bos taurus CF-24-HW liver cDNA library Bos taurus cDNA, mRNA sequence [DV784703]///Bos taurus spermidine/spermine N1-acetyltransferase 1 (SAT1), mRNA [NM_001034333]	TTATAAGTGGGGGGAAACAAGGGGACACCACCCCGCGGGATAATTTTTAAAGAGTTTTTT///CTTCATTCTTGTGAGTCATTTAAATGTGTACAATGTACACACTGGTACTTAGAGTTTCTG
A_73_115832|281752	0.023143	0.00255903	up	4.81334	4.81334	2.26704	CELA3B	Bos taurus chymotrypsin-like elastase family, member 3B (CELA3B), mRNA [NM_001166518]	AACCAAGGCCAAGGTGGCAGTGCCCATCCACACTCTTTGTGAAAAATAAAAGATCTCTCA
A_73_109696,A_73_P032806,A_73_P084511,A_73_P399386|530411	0.0155841	0.000260946	up	4.80736	4.80736	2.26525	UHRF1	Bos taurus ubiquitin like with PHD and ring finger domains 1 (UHRF1), mRNA [NM_001103098]	AGGAAGGAACAAAGTTGGACTTCTCAGTGTTTTTATTTTGGTTTTAAACAAAAAGCCTGC///CAGAACAGGGATATTTTTAAGTCACATAACTGCAGACAAACTGGAGCAATACTGTTTTAA///TTTCTGAGCAAAGTGGAGGAGACGTTCCAGTGCATTTGCTGCCAGGAGCTGGTGTTCCGC///CAACTCACCAATTGGGAATTACAAGAGGGAAACCTTTTAAAATGAATAAACACCTTTTCC
A_73_P060331|613905	0.0297191	0.0048205	up	4.78318	4.78318	2.25797	GSTO2	Bos taurus glutathione S-transferase omega 2 (GSTO2), mRNA [NM_001206155]	AAGAACACCTTCTTGGGCTTCTTGAATCTCTATTTTCAGAACAACCCCGGTGCCTTTGAC
A_73_P107251,A_73_P280851,A_73_108770|539175	0.0155841	0.000197598	up	4.78248	4.78248	2.25776	DUSP1	Bos taurus dual specificity phosphatase 1 (DUSP1), mRNA [NM_001046452]	ATGAGGCAATTGACTTCATAGACTCCATCAAGAATGCTGGTGGAAGGGTGTTTGTGCACT///TCTTGTCCCTGTTTCCTGAAGACACTTTTCATGCTTGACCTACCTACCAGTATTACCATT///TGTCCTGTAAATATATCCTAAGCAGGTTTGTTTTCAGCACTGGAAAGCACCAGTGTTGAT
A_73_P043591|507185	0.0154489	0.000134087	up	4.77431	4.77431	2.25529	SLC51B	Bos taurus solute carrier family 51 beta subunit (SLC51B), mRNA [NM_001077867]	GGAGTGTTCGCAGACAGAGTGAGTGAACTGCAATCAAACTAAAACCCTGTTTTGAAAAAA
A_73_P284171,A_73_P115491,A_73_112350|534227	0.0203791	0.00170278	up	4.75692	4.75692	2.25003	DOCK4	dedicator of cytokinesis 4 [Source:HGNC Symbol;Acc:HGNC:19192] [ENSBTAT00000033728]	GTCAGATGCACTTCGGAAGAACTTCTTAAATGAAAACTTTGATTATAAGAACTGGGATTC///ATGATTCCTATTTTCCACGATATGATGGACTGGGAGCAGAGGCGGAGCGGCAATTTTAAA///TATAAAGTGAATCACATCTGGAAATTCCGCTACGACAGACCGTTTCACAAAGGCACAAAA
A_73_P194217,A_73_106037,A_73_P072456|522265	0.015973	0.000354619	up	4.75487	4.75487	2.2494	SLC30A1	Bos taurus solute carrier family 30 member 1 (SLC30A1), mRNA [NM_001205893]	GAGCCATTGACTTGAGAGAAAAATCTGAAGGTTAATGCAGTTTGGATATTAAACTGTCAA///CAACTTTGTGGTTATTAGAGCAGAGTACAGCTATGCTGTAACAGTTTTGGAAAGCCAGTT///AAGCAGCCCAAGAGGACTAAAGTTGAAAACATCCCTGCTGTTGTGATAGAGATTAAAAAA
A_73_P154432,A_73_P270716,A_73_120341|508800	0.018312	0.0010336	up	4.74754	4.74754	2.24718	AZGP1	Bos taurus alpha-2-glycoprotein 1, zinc-binding (AZGP1), mRNA [NM_001034331]	GAGAGTGCCCTTCAGAGGGCCAGAGAGGACATCTTCATGGAGACCCTGAGCGATATCATG///CGCCTTATAGAATGATTATTTTTAAACTGCAAAGTGCTGTAGAAATGTAAGAGTTTGCCC///GATTATTTTTAAACTGCAAAGTGCTGTAGAAATGTAAGAGTTTGTCATTAGTCCTGCCTC
A_73_104497|100298356	0.0161901	0.000426081	up	4.70832	4.70832	2.23521	LOC100298356	Rep: CAAX amino terminal protease family protein - Silicibacter pomeroyi, partial (5%) [TC441189]	GAAATGGAAACGGAGTCTATGGAATGTTTCTGGACTGTCTTTGCTGGATTTGTGCAAACC
A_73_P350516,A_73_P389096,A_73_P040976|282369	0.0155841	0.000208275	up	4.70293	4.70293	2.23356	SLC7A5	Bos taurus solute carrier family 7 member 5 (SLC7A5), mRNA [NM_174613]	TTTGAGACTGTTGGGGCCTCAGTTTTCTTGGGTGTACATGGGGCACTGCCCTCTGCCTCT///TTATCATCTCGCTCCCGATCGTCACCCTGGTGTACGTGCTGACGAACCTGGCCTACTTCA///GCTTTGGGATGGGGAGTTTTGTGTTTTGTTGGGGTAATTTGTTTTTTAAGAATTGGAATT
A_73_P165962	0.0193603	0.00130483	up	4.70127	4.70127	2.23305		Rep: Sacsin - Homo sapiens (Human), partial (98%) [TC398123]	GTAGGTTATAAAAGAGGAATTATCAGCTTGTGTCTTCCCCATGAATAATTCAGAACTGAT
A_73_P251741,A_73_P050896|408005	0.0155841	0.000208919	up	4.67188	4.67188	2.224	HEY1	Bos taurus hes related family bHLH transcription factor with YRPW motif 1 (HEY1), mRNA [NM_001001172]	TTGCAGATGACGGTGGATCATCTGAAAATGCTACACACTGCAGGAGGGAAAGGCTATTTT///GTTGCCAACATCACCTTAAAGTCATCGGTAAAATAAAAAGGAAAAAGGTACACTTTCAGA
A_73_P057821,A_73_P169132|781334	0.0193632	0.00131298	up	4.66727	4.66727	2.22258	TMSB4	Bos taurus thymosin beta 4, X-linked (TMSB4), mRNA [NM_001113231]///Hw_Fat_57_050812_F09 Bos taurus CF-24-HW fat cDNA library Bos taurus cDNA, mRNA sequence [DV779394]	AAGAGAAAAATCCACTGCCTTCGAAAGAAACGATTGAACAGGAGAAGCAAGCAGGCGAGT///TTTCCCCAAAACCCCCCACATTTTTCGTTGGAAACAGTTGTCCCAAAAATAAAATTGTTT
A_73_P371436	0.0464946	0.0117982	up	4.66572	4.66572	2.2221		transducin like enhancer of split 6 [Source:HGNC Symbol;Acc:HGNC:30788] [ENSBTAT00000001533]	GCCCCAGTTTTCACAGGATATTCTGACGGAGCAGCTCTGGGAGATTTTTGCTGGGACCCA
A_73_P069356,A_73_P069366|503579	0.0172967	0.000791775	up	4.65661	4.65661	2.21928	FOXA1	Bos taurus forkhead box A1 (FOXA1), mRNA [NM_001206029]	TCAGCCCTGGAGCCAGCCTACTACCAAGGTGTGTATTCTAGACCCGTTCTAAACACTTCT///AACATGTTCGAGAACGGCTGTTACTTGCGCCGCCAGAAGCGCTTCAAGTGCGAGAAGCAG
A_73_104642,A_73_108628|614497	0.0161901	0.00050076	up	4.65613	4.65613	2.21913	AKAP2	PREDICTED: Bos taurus A-kinase anchoring protein 2 (AKAP2), transcript variant X1, mRNA [XM_005210503]///Bos taurus A-kinase anchoring protein 2 (AKAP2), mRNA [NM_001193034]	GCGCGAGAGAATGGATGATAGTAGTTACACCTCTAAGTTACTGTCTTGCAAGGTGACTTC///TAACCACTTCAATGTTATTATCCTGCTTTGGTTTTATAGTGATTGTGAGGCATTCAATGC
A_73_P066116|535946	0.0467171	0.0118978	up	4.65249	4.65249	2.218	KANSL1	KAT8 regulatory NSL complex subunit 1 [Source:HGNC Symbol;Acc:HGNC:24565] [ENSBTAT00000034753]	GACTATTGGCATTAAAGCTTCAGAAATCTCTGTGTTTGATATTCAAACATCATATGCCGA
A_73_P327626,A_73_121017|509139	0.0172602	0.000786388	up	4.65102	4.65102	2.21755	ANKRD37	Bos taurus ankyrin repeat domain 37 (ANKRD37), mRNA [NM_001075392]	AGGGAACAACCCAATAAAGATCATTGTGTTCAAGTGCTCAGACTGAAACGAAGTTTTGGA///GCGAAGATAATGTTCAAGAATACATGTATTTACATGCCTATAATGTTCTGGTTGTGCATG
A_73_101999,A_73_P292076|280741	0.0125429	1.00221e-05	up	4.64698	4.64698	2.21629	CA4	Bos taurus carbonic anhydrase 4 (CA4), mRNA [NM_173897]	TTGACCTCTGGTCTCAGCCCTTAAGAGGGCTTGGCCTCTGTCCCTCAGGCTTCTCAGATT///CTGTTCTATGACGACCAGCAGAAAGTGAATATGACGGACAACGTCAGGCCCGTGCAGAGC
A_73_P041961|522073	0.014751	7.09834e-05	up	4.64653	4.64653	2.21616	RCN3	Bos taurus reticulocalbin 3 (RCN3), mRNA [NM_001046260]	ACCTGCCCAAAGGATGTCTCTTCTCTGCCAGGGAGGCAATAAAATCCAGTGCTGGGGCCT
A_73_P163882	0.0418504	0.00972135	up	4.62774	4.62774	2.21031		Rep: Succinate dehydrogenase iron-sulfur protein - Xylella fastidiosa, partial (7%) [TC469925]	AGAAGAAAGCACATTTTCCCTGTCTTTCCTGTATCAACTCTGTCCTTGGGTAACCAAATG
A_73_105292	0.0176145	0.000900095	up	4.61348	4.61348	2.20585		Rep: Uncharacterized protein At1g15830.1 - Arabidopsis thaliana (Mouse-ear cress), partial (8%) [TC433192]	CGGGAGCAGCAGGGGATACTACCCCCTCATCATCTCCAAGGCAAGTGGTGTGAATCTTCA
A_73_P032451|511845	0.0194236	0.00133145	up	4.61114	4.61114	2.20512	ABL2	Bos taurus ABL proto-oncogene 2, non-receptor tyrosine kinase (ABL2), mRNA [NM_001143855]	CCTGTCCTTAACAACTTACTGTCATGTGTACAGGAAATCAGTGATGTGGTGCAGAGGTAG
A_73_P183837|100297155	0.0187001	0.00113345	up	4.60307	4.60307	2.2026	HMGA2	PREDICTED: Bos taurus uncharacterized LOC100297155 (LOC100297155), mRNA [XM_002704288]	TCTCCCAAGTGGGTAACCCCAGACTCATTTCCTACATTTACTATTGGTGAGATTTCCAAG
A_73_118171	0.018989	0.00121551	up	4.59388	4.59388	2.19971		HW_Fat_71_050831_D03 Bos taurus CF-24-HW fat cDNA library Bos taurus cDNA, mRNA sequence [DV776025]	TTTTTTCAAAGTGTAGGTTTGTGAATAGATTTTAGCATGATGAAACTGTCATTACAGTGA
A_73_P048511,A_73_P101246,A_73_P098836|282094	0.0154489	0.000114474	up	4.58199	4.58199	2.19597	TIMP3	Bos taurus TIMP metallopeptidase inhibitor 3 (TIMP3), mRNA [NM_174473]	GGGGGGTGTGTTTGCATACACATTTACATATACCCACATGGGGACATAAGCTAATTTTTT///TACATCCACACAGAAGCTTCTGAAAGTCTCTGTGGCCTTAAGCTTGAGGTCAACAAGTAC///AACTGCAAGATCAAATCCTGCTACTACCTGCCTTGCTTTGTAACCTCCAAGAACGAGTGT
A_73_P257206,A_73_101280|767841	0.0280617	0.00428491	up	4.57145	4.57145	2.19265	ARMCX2	Bos taurus armadillo repeat containing, X-linked 2 (ARMCX2), mRNA [NM_001076960]	CGGCTTCAGGTATACATGAATAAAGTGATGGATGACATCATGGCCTCTAACCTGAACTCA///GTTTTGAATAATGTACCAATCAGAGTGATGTTATCTGCGACTATCTCCAGTTTTAAGCTG
A_73_111047	0.016629	0.000664168	up	4.55561	4.55561	2.18765		Rep: Sodium/myo-inositol cotransporter (Na(+)/myo-inositol cotransporter) - Bos taurus (Bovine), complete [TC393953]	AAACCCTGCAAACTTATGTAACTGTTGCATCTCTCAGGCATTGTTTACGCTGTAGATTTT
A_73_P506178,A_73_121147|510420	0.0156265	0.000294907	up	4.54626	4.54626	2.18468	MYBL2	Bos taurus MYB proto-oncogene like 2 (MYBL2), mRNA [NM_001075448]	CCTTCCTTCAACTTGTTGGTGCATTTTCTTGAAAGAATAAAAGTTGTCTTTTTCCTGGGC///GTTCTCATGTTTACAGGGGGCTGGGGGCCGATTCTGGGCTGTGAGTGAGAATCACACTCA
A_73_P063366,A_73_P402791|509083	0.0155841	0.000286399	up	4.54271	4.54271	2.18355	PDZRN3	PDZ domain containing ring finger 3 [Source:HGNC Symbol;Acc:HGNC:17704] [ENSBTAT00000024807]	GCAAAATCGCCAGACGGCACTAGAGTATACAATTCATTCCTCTCGGTGACTACTGTATAA///TTGGTGGCCGGCCGTGTGTGGACAACCAAGATGGATCGTCCAGTGAAGGAATCTTTGTAT
A_73_P434341,A_73_P330751,A_73_109214|100125317	0.015973	0.000351656	up	4.53813	4.53813	2.1821	ERO1A	Bos taurus endoplasmic reticulum oxidoreductase 1 alpha (ERO1A), mRNA [NM_001103348]	CAGGATGCAGAAAACCAAATGTTACTTCTGGAAATACTTCATGAAATCAAGTCATTTCCT///GCTGTTCTTCAGTGGACCAAGCATGATGATTCCTCAGACAACTTCTGTGAAGTTGATGAT///TGAAAAGTGCCTGTTTCTGGACAGTGGAGGCCAAAGAATGGAATTGCATTCAAAGGCATA
A_73_P059766,A_73_109942|540380	0.0337412	0.00636217	up	4.5147	4.5147	2.17463	DUSP4	Bos taurus dual specificity phosphatase 4 (DUSP4), mRNA [NM_001206953]	TCACAAGGCCGACATCAGCTCCTGGTTCATGGAGGCCATCGAGTACATCGATGCGGTGAA///TCTTTTAGGACATGGTTTTCCTTTTTAAGTCACCATCAACGGGTGAATACTTACGCTTAA
A_73_P102586,A_73_P377856,A_73_P298996,A_73_108229|514386	0.0155841	0.000158267	up	4.51009	4.51009	2.17316	BIRC3	Bos taurus baculoviral IAP repeat containing 3 (BIRC3), mRNA [NM_001035293]	CTAAGAAAATGCCCTATTTGTAGAGGTACAATCAAGGGTACAGTTCGTACATTTCTTTAT///ACTTAATACAATTTAAAGGACAAGAGTTCATTAGTCGAGTTCAAGCCAAGTTACCCTCAT///CTGCCAGGGTGATTAGTGAACAAGAACATGATGTTATTAAACAGAAAACACAAACATCTT///ATCAGGAACACAAATTCCTTTGCTTTTTCCATCAGTGTCCTATACATAGAAGGTCTTGAT
A_73_112690|281904	0.0175245	0.00086295	up	4.50835	4.50835	2.1726	LOXL4	Bos taurus lysyl oxidase like 4 (LOXL4), mRNA [NM_174384]	ATCTTCACAGGTCTGACGCTCTCATGCCAATAAAGGTTGCTCACTATGGACTGCTACAAA
A_73_P095836	0.0404341	0.00915902	up	4.49981	4.49981	2.16987		PREDICTED: Bos taurus late histone H2B.L4 (LOC615183), mRNA [XM_010800925]	TGAGTATCGTGAACTTGTTCGTGAACGATCTGTTTGAGCGGCTGGCCGGTAAGGCCGCCT
A_73_115476	0.014751	8.10204e-05	up	4.49605	4.49605	2.16866		Rep: Isoform V of Q14141 - Homo sapiens (Human), partial (49%) [TC411808]	CCTCTGGGGCTTTCATTCACCAGGAAAAACATCCCAAAACCAGCACTGTTTAGCTTGATA
A_73_P063816,A_73_P428196|511484	0.0250795	0.00324235	up	4.49304	4.49304	2.16769	RBSN	Bos taurus rabenosyn, RAB effector (RBSN), mRNA [NM_001205700]	AGGAGCTGCTGCTCCAGCAGATCGACAACATCAAGGCGTACATCTTCGACGCCAAGCAGT///GTATGAGCTAATAGACGCGTTAAGTAAGAAGATCTTAACCTTAGACATGAAGCAGGACCC
A_73_P386121	0.0256841	0.00346217	up	4.48015	4.48015	2.16355		Rep: Bromodomain containing 2 - Homo sapiens (Human), partial (20%) [TC410911]	TGGGGGTCTATGCGGCACTCTTCTGCCTGGTGACTGACGCTTTGGAAATGAGGTTTATGA
A_73_P248936,A_73_P090686|511022	0.0155841	0.000227195	up	4.47348	4.47348	2.1614	IL23A	Bos taurus interleukin 23 subunit alpha (IL23A), mRNA [NM_001205688]	GGGAAATTTTGGGATTATTTATAGTGGCAGGAGCTTGGGGATGAGGATTATTTATTATAT///AAGAATTCATCGAGGCCTGGTTTTTTACGAGAAGCTGCTGGGCTCAGATATTTTCACAGG
A_73_107327,A_73_P402706|281528	0.01858	0.00111053	up	4.47339	4.47339	2.16137	TGM2	Bos taurus transglutaminase 2 (TGM2), mRNA [NM_177507]	CTTTTGGGTTCCAAGCAAGCAGTAGATGTGCTTTTGAGCTACAAACAGCGAGCACTGAAA///GGGACCCCACGAATTGCCATCTCTGACTTTATTCCTCACTCTCTCCATGTGACCAGGCTT
(+)E1A_r60_a97	0.0161901	0.000478844	up	4.43695	4.43695	2.14957		Unknown
A_73_105328|505766	0.0409354	0.00936241	up	4.41958	4.41958	2.14391	BMP2K	Bos taurus BMP2 inducible kinase (BMP2K), mRNA [NM_001304265]	ATGAGGAAGTTCTCCAGGGAGAACAAGGAGATTTTAATGACGACGACACTGAACCGGAAA
A_73_P261401,A_73_P036526,A_73_P088756|505226	0.0169822	0.000743077	up	4.41754	4.41754	2.14324	FAM221A	Bos taurus family with sequence similarity 221, member A (FAM221A), mRNA [NM_001075195]///serine/threonine kinase 31 [Source:HGNC Symbol;Acc:HGNC:11407] [ENSBTAT00000014042]	CCATCAGCTGAATTTTTAGACTCTCCAGTTATGGCCATGGACCACCCATTTCTAAAGGCA///ATGGCCATGGACCACCCATTTCTAAAGGCATTTCAAGCATCATCTAGCTCTTCTCCAGAA///GGAAAACCTGCTTCTCCGAGTTCTGACTTATATGCTTATGGCTGCCTTTTATTGTGGGTA
A_73_115487|100271839	0.0238177	0.00281387	up	4.40838	4.40838	2.14025	C23H6orf141	Bos taurus chromosome 23 open reading frame, human C6orf141 (C23H6orf141), mRNA [NM_001145653]	GAGTCATTACACTCCACTTGCTGATCTTATTCTTGTTGGTCATCACTAGCACTTGATGTG
A_73_P404531,A_73_118758,A_73_P101236|281408	0.0155841	0.0002763	up	4.39945	4.39945	2.13732	PLAU	Bos taurus plasminogen activator, urokinase (PLAU), mRNA [NM_174147]	GAAATTCCAAGGGGAACACTGTGAGATAGATACATCGAAAACCTGCTATCAGGGGAATGG///CTGAGTTCATCCAATCCTCACTGAGTGAGGCAAGGACCACTCCTGTACACTGAATATTTA///AAATTGGCCTAAAGCAGTTTGTCCAGTTCTGCATGGTGCAGGACTGCTCTGTTGGAAAAA
A_73_P172892	0.0464669	0.0117696	up	4.38779	4.38779	2.1335		Rep: Sodium- and chloride-dependent creatine transporter 1 - Rattus norvegicus (Rat), partial (3%) [TC414461]	CATAGTTGTTTGGTGATTGTTACCTGCAGAAAATAAAACTGAGCTTTTGTGCTGTCTCTG
A_73_115387	0.044994	0.0111227	up	4.38356	4.38356	2.1321		Rep: Toll-like receptor 7 - Bos taurus (Bovine), complete [TC392143]	ATCACGTTGGCATTCTGATTTCCTCCAGACTGGCTTCCATGCTTCAGACTTGTGAGAAAT
A_73_110535,A_73_P123276,A_73_P375061|541054	0.016629	0.000622615	up	4.38036	4.38036	2.13105	BTG3	Bos taurus BTG anti-proliferation factor 3 (BTG3), mRNA [NM_001034722]	CATGTTGAGCGAAGGTAGAATAAGCCTGACTACACATTAAAAGTTCATACTTAAAGTAGT///GGAAGAATAAACCATATCGCCCAGTTCCAGTAACATGGGTACTTCCTCCTGGAATGCATT///GTAGGAGTGGATGATCTAGCACCTTTGAGCATTTACTTTATGGAAAGTATGTAAGTTATT
A_73_100920	0.0225384	0.00233689	up	4.37257	4.37257	2.12848		Rep: Membrane protein - Oenococcus oeni ATCC BAA-1163, partial (7%) [TC469465]	CACCTTTGGAAAAGGAATGCAAATAAAGAGCTGTCCCTGGAAACTAAATGTGAATTTCTG
A_73_116890	0.0161901	0.000441067	up	4.3618	4.3618	2.12492		Hw_Fat_13_050801_B06 Bos taurus CF-24-HW fat cDNA library Bos taurus cDNA, mRNA sequence [DV780654]	AAACCCTGTCTGGAAGGAATGTATTTGTTGCTAAATTTTGTAGCACTGTTTACAGTTTTC
A_73_113497,A_73_P458381|505315	0.0155841	0.000279669	up	4.36104	4.36104	2.12467	AMDHD1	Bos taurus amidohydrolase domain containing 1 (AMDHD1), mRNA [NM_001098872]	AGAGCTTCATGGCAGAGTTCAAGACTTGTCATTTTATACACAAGTACAGGGACCTTCTTG///CATTTGAGGAAAGAATTGACTGTTCTGGGAAATGCATCTTGCCAGGTTTGGTGGATGCAC
A_73_P412806	0.0208339	0.00186485	up	4.3589	4.3589	2.12396		PREDICTED: Bos taurus phosphodiesterase 4D, cAMP-specific, transcript variant 1 (PDE4D), mRNA [XM_588063]	CGGTGAGCTGCACTGACCTCTACATTTTGTATGATATGTAAAACAGATTTTTTGTAGAGC
A_73_109317|511755	0.0206643	0.00178794	up	4.34749	4.34749	2.12018	SFXN3	Bos taurus sideroflexin 3 (SFXN3), mRNA [NM_001101946]	AGTGAGATCCTCTAAGAGCACCTTCCTGCTTCCCGCAACCAACCGCCACCAGTAATAAAA
A_73_P037226,A_73_P091166|515202	0.0222406	0.00221035	up	4.34189	4.34189	2.11832	USP18	Bos taurus ubiquitin specific peptidase 18 (USP18), mRNA [NM_001017940]///Rep: USP18 protein - Bos taurus (Bovine), complete [TC400155]	TACATCCGGAGTTCTGAAGATGGAGAATGGTTCTGCTTCAACGACTCCAATGTTTCTTGG///ATTGATCACCTACTTTGTGAAATGGTATGCCAGACAGTAATGAATACAATTCTTTCTCTC
A_73_P102656,A_73_P037951,A_73_117611,A_73_P108451|282359	0.0288225	0.00452374	up	4.33927	4.33927	2.11745	SLC2A4	Bos taurus solute carrier family 2 member 4 (SLC2A4), mRNA [NM_174604]	TTCTATTCGCGGTCCTCCTGCTTGGCTTCTTCATCTTCACCTTCTTAAAAGTGCCTGAAA///AACACTGGGCTGGGAGGAGCCTTCAGATATTTTTGTATATGTTTGAAAAAGCAGGGGCAG///GGGCAGGGAGAAGAAACTGAAGGTCTGTTGTACTAAATGTATATATAGAGAGATCCGTAT///TATGAGATGCTCATTCTTGGACGGTTCTTCATTGGCGCCTACTCAGGGCTGACGTCGGGG
A_73_P133146	0.0444776	0.0108787	up	4.3252	4.3252	2.11277		1360576 MARC 7BOV Bos taurus cDNA 5', mRNA sequence [DN532522]	TGGCGGTTGCTTTATGTTTCCTACAATGTATCTGCCTTATGTTTGGAAATAAAAATCTCT
A_73_119522	0.034945	0.00679035	up	4.32184	4.32184	2.11165		Rep: Liprin-alpha-1 (Protein tyrosine phosphatase receptor type f polypeptide-interacting protein alpha-1) (PTPRF-interacting protein alpha-1) (LAR-interacting protein 1) (LIP.1). - Bos Taurus, partial (24%) [TC452184]	CCTAAAATACTGTGTTGAAAAGTGTGGATGTACATCATGGTAAATCAGCTGTACTGGAAT
A_73_P137731,A_73_104845|510699	0.0381009	0.00806739	up	4.30428	4.30428	2.10577	RND2	Bos taurus Rho family GTPase 2 (RND2), mRNA [NM_001192266]	ATATCCTGGTCCTGGCACGCTTCCCCAAGGAAAGTGTCCACTCTCTGACCTTCTTTCTTC///TTGTGCTGGTTGGCTGTAAACTGGACATGCGGACTGACTTGGCCACACTGAGGGAGCTGT
A_73_P394126,A_73_P030556|515406	0.0202163	0.00164611	up	4.28527	4.28527	2.09939	CSRNP1	Bos taurus cysteine and serine rich nuclear protein 1 (CSRNP1), mRNA [NM_001098035]	AAGGAGGAGAAGCTGGAGGCGCTGAGATGGAAGCTTTCGGAGACTGGGGTGCCCAAGACG///GTTGGCTGGCTCCCATGTGGGCACTCCTACTAATTTTCATGCAACACTCTGGATTGATTT
A_73_104810	0.0162642	0.000568756	up	4.27937	4.27937	2.0974		Rep: Pulmonary surfactant-associated protein B - Ovis aries (Sheep), partial (16%) [TC463829]	TTCTGGTTAAAGTTTCAGAGTATGCAAGTATCACCATGAACCAAATGCTTTACAAGCTAT
A_73_106300|100139053	0.0170598	0.000753174	up	4.2729	4.2729	2.09522	LIN54	Bos taurus lin-54 DREAM MuvB core complex component (LIN54), mRNA [NM_001205481]	GCGATGCTTAATGAGTGTCATCAACTCTGCAGGAAAAGCAAAAAGTGACCCTTGTGCCAT
A_73_101460	0.0185367	0.0011045	up	4.26429	4.26429	2.09231		Rep: Exosome complex exonuclease RRP42 (EC 3.1.13.-) (Ribosomal RNA- processing protein 42) (Exosome component 7) (p8). - Bos Taurus, partial (38%) [TC449206]	TGTATTGATCACCTACTTTGTGAAATGGTATGCCAGACAGTAATGAATACAATCTTTCTG
A_73_120639|507390	0.0159636	0.000328194	up	4.24943	4.24943	2.08727	BCL2L11	Bos taurus BCL2 like 11 (BCL2L11), mRNA [NM_001075310]	CATGTGGCCGATTTTCCAACGGAAGCTTGATGTGAATGTAAATGAGGGAGGGATTCTCTT
A_73_109749	0.046774	0.0119204	up	4.23312	4.23312	2.08172		Rep: Zeta-chain (TCR) associated protein kinase 70 - Rattus norvegicus (Rat), partial (21%) [TC480163]	GGGCTGAGCCTGTCCACCCAGAGGTGTGCTCCACACTCATTTCCCCACATTAGACACATT
A_73_P255176,A_73_P042291|514588	0.0303129	0.00500929	up	4.2136	4.2136	2.07505	FBLN1	Bos taurus fibulin 1 (FBLN1), mRNA [NM_001098029]	TCTAGGCAACTGTATTGATATCAATGAGTGTTTGAGTATCAGTGCCCCATGCCCTGTTGG///AGTCCATCTGTTGTCTTTTGGTGTTTAAATAATGAGTCCAATGACTTAAGTGTTTGGTTG
A_73_P033936|768031	0.0155841	0.000268273	up	4.20592	4.20592	2.07242	C29H11orf86	Bos taurus chromosome 29 open reading frame, human C11orf86 (C29H11orf86), mRNA [NM_001077090]	ACCCGCACCCAATGCCCAACACTGCGTTGAACACAGGAATAAAGGTTGCCGAGCTGAAGT
A_73_115482	0.0224004	0.00229456	up	4.20123	4.20123	2.07081		Rep: Mitochondrial dimethyladenosine transferase 1, mitochondrial precursor (EC 2.1.1.-) (S-adenosylmethionine-6-N', N'-adenosyl(rRNA) dimethyltransferase 1) - Bos taurus (Bovine), partial (21%) [TC433629]	TTCAGACTGTTTTAGTGACGATTATACACTTTGGGTGGAACAGTTATTCTCCCACTGCAG
A_73_P423986,A_73_P035911|540990	0.0199544	0.00153537	up	4.183	4.183	2.06454	LCP1	Bos taurus lymphocyte cytosolic protein 1 (LCP1), mRNA [NM_001034720]	AAGAAACTCACCCCTTTCACCATTCAGGAAAATTTGAACCTGGCTCTGAACTCTGCGTCA///GAAACACGGGAGGAGTCAGCCATTCCAAAATTTCAACTCGATGACATTATTCACAGTTCC
A_73_P211552,A_73_P090241,A_73_P368151|516929	0.025068	0.0032315	up	4.16464	4.16464	2.05819	CSRNP2	Bos taurus cysteine-serine-rich nuclear protein 2 (CSRNP2), mRNA [NM_001192458]	AAACACAGGACTTCCAGGAGTTCATTGCCGAGAACGAGACGGCGGTGATGCACCTGCAGA///AAGATATTGATGTGGAAAATGTGGAGGTGGATGATTACTTCTTCCTGCAGCCTCTGCCCA///AGAGGAAGTTTGATGATGTGGATGTGGGCTCATCAGTTTCCAACTCCGATGATGAGATCT
A_73_113516,A_73_P066841|515359	0.0242725	0.00296457	up	4.16452	4.16452	2.05815	CA5A	Bos taurus carbonic anhydrase 5A (CA5A), mRNA [NM_001192409]	GGTAGAACTGACTTTAACAAGAGAAAGTATTGTTTCCTGGGCTTCACGGTCCGATCGTGT///GATGGTAAACAACTACCGCCCACTCCAACCCCTGATGAACCGGAAGGTCCGTTCGTCCTT
A_73_P119146	0.023143	0.00256156	up	4.13508	4.13508	2.04791		BP250019A10B7 Soares normalized bovine placenta Bos taurus cDNA clone BP250019A10B7 5', mRNA sequence [BF039129]	ACCTGGAATGCCCCCATACCCACTTGTGAACAAATAAAAACACTCTGTCACCAGGAAAAA
A_73_112587|539596	0.0301618	0.00495085	up	4.11721	4.11721	2.04167	TGFBI	Bos taurus transforming growth factor beta induced (TGFBI), mRNA [NM_001205402]	AAATGGCATCCTTATAAGCTATGAGTTGAATGGCTCTGCCAAATGTTTTTCGCGCCTCCA
A_73_110835|510244	0.0193919	0.00132402	up	4.11095	4.11095	2.03947	CDKN2D	Bos taurus cyclin dependent kinase inhibitor 2D (CDKN2D), mRNA [NM_001046050]	TATGGAAAATATTGTTGTGTGTGTAATTTAATGTTTTTACCCATTAAATTAAGACTTGTG
A_73_P040961|618810	0.014751	3.39001e-05	up	4.1042	4.1042	2.0371	PHLDA2	Bos taurus pleckstrin homology like domain family A member 2 (PHLDA2), mRNA [NM_001076521]	TCTTAACGTTTGTACTCCACCACCATTCCAATAAAGCACTCGGTTCATTCTCTTTTCTAT
A_73_111317	0.0484106	0.0126771	up	4.07491	4.07491	2.02677		interleukin 24 [Source:HGNC Symbol;Acc:HGNC:11346] [ENSBTAT00000010325]	AAGCAGCTGTGACCAAAGCCTTTGGAGAAATGGACATTCTCTTGAGCTGGATGGAGAAAT
A_73_P072006|540889	0.0208339	0.00185895	up	4.0694	4.0694	2.02482	PHF13	Bos taurus PHD finger protein 13 (PHF13), mRNA [NM_001206041]	ATAAACTGTACATAGCCAGTGACTGAATAAAATCCTTGTTGGCCAGAGCTGCTGCTGGAG
A_73_P037081|613376	0.015973	0.000352022	up	4.04544	4.04544	2.0163	RPIA	Bos taurus ribose 5-phosphate isomerase A (RPIA), mRNA [NM_001035433]	CTTGGCAGGGTGAGGGTTAAATCCAGTCTTCTGAAGTATTGTTATTAAATGTCTTTTTAA
A_73_114117	0.0265416	0.0037527	up	4.02803	4.02803	2.01007			ATCTTCCCATTTCCTATCTTTTTGTATCTGAAGTCTTCCTAATGTACTGCACAAACCATG
A_73_P180392,A_73_P039506|781721	0.0332917	0.0061637	up	4.01796	4.01796	2.00646	C16H1orf21	Bos taurus chromosome 16 open reading frame, human C1orf21 (C16H1orf21), mRNA [NM_001081547]	TATTTTCTAAAAGACGAGGTAGTGGTGAACTCAGATATCCAACTTCTGTTCTAGACTGGT///GCTCAGATGCAGACGGAAGTGTGATCACAATCATTTTGAATCCCTCTTGCCCACTTTTTT
A_73_110748,A_73_P115591|528870	0.0161901	0.000422876	up	4.01494	4.01494	2.00538	NAV3	Bos taurus neuron navigator 3 (NAV3), mRNA [NM_001192669]	ACACAAAGCTGCGACAGTGATAGCACCAGCCATCATGAAGACATTTTGGATTCGTCTCTT///AAGATGTTGGGTATGAGGGCTGTATATCCACGAAGGAAGCTACAACCTCAAAGCACATTC
A_73_P049741|513971	0.015973	0.000339624	up	4.00187	4.00187	2.00068	HIST1H1C	Bos taurus histone cluster 1, H1c (HIST1H1C), mRNA [NM_001083425]	TTTCTCAGTCTTACGGGATATTCCGATTGGGCTAAAAACTCATTCAAAAGTCCCGCCTTG
A_73_P120931	0.0292208	0.00462655	up	4.00178	4.00178	2.00064		LB0307.CR_L03 GC_BGC-30 Bos taurus cDNA clone IMAGE:8134805, mRNA sequence [DV934598]	GTGTGCGTAAATGACAAGGAACTTAGGTGAATTTTCTTAGGGAGTGAGTCGGTAGTGTGA
A_73_P034726,A_73_P306106,A_73_P365636|538465	0.0157737	0.000308488	up	3.99433	3.99433	1.99795	TRIB3	Bos taurus tribbles pseudokinase 3 (TRIB3), mRNA [NM_001076103]	TGGAAAGTCTCAGGTTCAGGACCCTACATTAACACTATGGGTTTATATGCCATGAGTGTG///AGTGCAAAACATGAGGCTGGTCCTCATCTTACTGAAAAGAGTAATTTGGAGTGAGGGCCT///TGGAGCTGGATGATGACCTAGACACTGAGTGTCCCAGCCAGAAACAAGCTCGAAGTGGGC
A_73_P115351	0.0177178	0.000919284	up	3.98493	3.98493	1.99456		stromal interaction molecule 2 [Source:HGNC Symbol;Acc:HGNC:19205] [ENSBTAT00000047170]	ATGATTTAGATGAAGATACACCCCCAATAGTGTCACAGTTTCCAGGGACCATGGCTAAAC
A_73_P102196,A_73_114399|415112	0.0356685	0.00708836	up	3.97274	3.97274	1.99013	AGR2	Bos taurus anterior gradient 2, protein disulphide isomerase family member (AGR2), mRNA [NM_001040500]	AGCTTTAAAGAAGGCATTTGCTGAAAATAAAGAAATCCAGAGATTGGCAGAGCAGTTTGT///AACCAGAGGAGGTTTTGAAAAACTCTGGAGAACGCTGAAGCACTGGTGAACCTACTGATT
A_73_120116,A_73_P457976,A_73_P270066,A_73_P308141|510743	0.0155841	0.0002665	up	3.96314	3.96314	1.98664	ARHGAP18	Bos taurus Rho GTPase activating protein 18 (ARHGAP18), mRNA [NM_001110772]	TTTTAATTAAGAGCAGCCTGTGGATATGATCACTTAAATACCTTTGTGATGATTTGTGCC///CAAAACAAGAGATTCTGGCCTTTTTTGTGTCCCATTGCAGTATTGGTAGAACAAGATCAG///CCTGTCAGAAACTGCCAATTCTTACTGCACTGTTTAAGACTTACGTATTCAGAATAAATA///CACACTGAGCCTTAAAAAGTTCTAGATTTGTGCTGCTGCCAGATTATGTGAATTATTATT
A_73_P340221,A_73_104807|614893	0.0155841	0.00021332	up	3.9612	3.9612	1.98594	CDCA7	Bos taurus cell division cycle associated 7 (CDCA7), mRNA [NM_001037488]	GCCCCATGCCGTCCTTTTATTTCCAGTGATTTTCCTCCATCATTTAGTTTGGGAATCTTT///CTGTAGCTCTGCCGGTTCGGTTCAGTGTTTGGTGCATAATTGGACCTTGAATCAATACAT
A_73_109914,A_73_P412076|512027	0.0300553	0.0049185	up	3.95635	3.95635	1.98417	SIT1	Bos taurus signaling threshold regulating transmembrane adaptor 1 (SIT1), mRNA [NM_001206418]	TGGCAGAACACCAGTCTCCATCCTGCCGTCTCTGTCGTGTGCCAAAGTTTTTAAATAAAA///ACTGTTTCCCAACCACCCCCTGAAGACAGGCAGCCCTTTCTCAGTCACAGGACTGATGGT
A_73_P240945,A_73_P262746,A_73_121412|534497	0.0178287	0.000932229	up	3.95279	3.95279	1.98287	PMP22	Bos taurus peripheral myelin protein 22 (PMP22), mRNA [NM_001101156]	TATAATACATAACAATGCACCGCCTTTATCACGCCCACATTTCCTTATGGTCGGAGCATC///GGGGGGTGGTTAGTGTTGATTGAAGATGTATATAATATCGACGGTTTATAAAACCTATTT///TAGATGTATATACGGGGCCCTTCTGATGCCAAGACTCCAGACCTTGTTTTTTCCCTCTTT
A_73_113219,A_73_P333671|539606	0.0176142	0.000898363	up	3.9465	3.9465	1.98057	PYCR1	Bos taurus pyrroline-5-carboxylate reductase 1 (PYCR1), mRNA [NM_001014957]	CCTTTCCTAGCCTGACCCACAGACGCTGTCAGCTCTGTCTCTTAACTTTTTAGGATAAAT///ACACATCATCCCCTTCATCCTGGATGAGATCGCCGCCAACATTGAGGCTCGGCACATCGT
A_73_114366	0.0299157	0.00487568	up	3.93827	3.93827	1.97756		Rep: Coiled-coil domain-containing protein 18 (Sarcoma antigen NY-SAR-24). - Canis familiaris, partial (83%) [TC425564]	GCTGGTTCAACTCAGGGAGAAAATTTATAGTTAAAAGAAGACGCTGATGTGATGAAAAGT
A_73_P108491,A_73_P108486,A_73_104879|281032	0.0169822	0.000741769	up	3.92261	3.92261	1.97181	BTG1	Bos taurus BTG anti-proliferation factor 1 (BTG1), mRNA [NM_173999]	ATCAGGTTACCGTTGTATTCGCATCAACCATAAAATGGATCCTCTGATTGGACAGGCAGC///AGGCCGCCGTGGCTCGTTTCTTCCACTTTCCTGCCGCCTCCTGTGTCGAAAATAACTTTT///GTAACTCTCCTTGTACTTAATTGGGTTAAAAGTCTTTTCCACAAACCACCATCTATTTTG
A_73_P327771,A_73_P044906,A_73_P323816|513605	0.0173221	0.000828387	up	3.92146	3.92146	1.97139	GTPBP2	Bos taurus GTP binding protein 2 (GTPBP2), mRNA [NM_001083421]	TAAGTCCTCTCTTGTTTTAGTAGTTTGCAGTGAGCATCCCTTTCCCTCTGTTGCAGGGAA///GGACTCAGGGATTTGGTTGAGGTTTCTCTGCGTGTATGTATATATATATATATATACACA///AGTCTTTCTGAATATTTTGCCTCCACTCACCAATAGCAAAGAGCAGGAGGAGCTCATGCA
A_73_P398711,A_73_P037296|513389	0.0163133	0.000586245	up	3.91767	3.91767	1.96999	DGKD	Bos taurus diacylglycerol kinase delta (DGKD), mRNA [NM_001035282]	AAGTGTGTAAGTTCAAGGCCCACAAGCGCTGCGCTGTGCGTGCGACCAGTAACTGCAAGT///CCACATCTGGGGTTGTAAATACAGTTGTTCTGTGTATAAATAAAACAAGCCTGTTTTTGA
A_73_P090431,A_73_P329576,A_73_100268|514273	0.0183975	0.00106355	up	3.91639	3.91639	1.96952	AMIGO2	Bos taurus adhesion molecule with Ig like domain 2 (AMIGO2), mRNA [NM_001205786]	CAACGTCTGTTAAATGAAACTGTGGATGTTACAATAAACGTGAGCAATTTCACCATAAAC///AGACCGGGCTGCAAGCAACTGCTGTGTTTGTTGGTTATCACGATGACTGTGAGCCGTGGC///TGGACATTTGATTTAATGTAAATACGTGTGTTCTGCGACTTGATGTGCTGTTTTATTTGG
A_73_P149556	0.014751	7.93756e-05	up	3.90449	3.90449	1.96514		Rep: IKAROS family zinc finger 2 - Bos taurus (Bovine), partial (15%) [TC447560]	AGTTCACACTGACTCTTGTTATCTTCGGCAGTTGATCTCGATGACTCTTAATTAAACTCT
A_73_P488353	0.0425316	0.0100026	up	3.90095	3.90095	1.96383			TTGTTCCCTCACTGTGGGAATCTCTAATGTGAAGATGAATTCTATGACAAAGTCTTTTTT
A_73_P086481	0.0196316	0.00139424	up	3.90062	3.90062	1.9637		PREDICTED: Bos taurus uncharacterized LOC100847289 (LOC100847289), miscRNA [XR_139371]	TGTCTACCTGAAATATTTGGCATCATTTGAAGAGGAGCTGAAGAAGGTCCAGGAGCACAC
A_73_104434	0.0176142	0.000895237	up	3.89981	3.89981	1.9634		PREDICTED: Bos taurus sulfotransferase 1C4 (LOC100300896), transcript variant X2, mRNA [XM_002691338]	CATCTTCCTGCCAATACTGCAAACTGAAGGACCATCTGCTCTTTGGAAGTCTTTCACACA
A_73_103878	0.0161901	0.000428167	up	3.89688	3.89688	1.96232		Rep: Membrane-bound O-acyltransferase domain-containing protein 1 (EC 2.3.-.-) (O-acyltransferase domain-containing protein 1). - Canis familiaris, partial (31%) [TC412699]	TGGCTCCTTTGGGAAACTTCTGCTAGGTGATATTCTATGTGGGAGAAGGAAATGTGGTAT
A_73_P165667	0.02068	0.00179581	up	3.89523	3.89523	1.96171		PREDICTED: Bos taurus family with sequence similarity 13, member A1-like (LOC782654), mRNA [XM_001251290]	ATGTTCACAATCTTGCCACTGTATTTGGGCCAAATTGCTTTCACAAGGGACCCTCACAAC
A_73_119711|617142	0.0205071	0.00172518	up	3.89428	3.89428	1.96135	HSF2BP	Bos taurus heat shock transcription factor 2 binding protein (HSF2BP), mRNA [NM_001035493]	CCAGTTCACGTTTATCTTTCAACCTTTTGGTGAACCTATTATTTCAGATGACATTGGACA
A_73_P108116,A_73_P210392,A_73_P043911|281203	0.0155841	0.00022743	up	3.88905	3.88905	1.95942	GNG2	Bos taurus G protein subunit gamma 2 (GNG2), mRNA [NM_174072]	TTTTTAGCAAAGTGGGCGCCTTTCTAGTCCACAGCATTTAAAGAGAGGGAGGAGAACCAT///TAGGGAGAAGAAGTTTTTCTGTGCTATCCTTTAAGTCTTCAGGAGGAACCTGAGGAGCCT///AGTATGAAAGCTGATCCACACCCCAAGTTAAGAGATCTGATGTCTGGAGAACTGCCTAGA
A_73_106247,A_73_P048411|538143	0.0161901	0.000399925	up	3.88869	3.88869	1.95928	RHOV	Bos taurus ras homolog family member V (RHOV), mRNA [NM_001076099]	GCGCCCGTGCTGCTGGTGGGTACCCAGGCCGACCTGAGGGATGATGTCAATGTACTGATT///CTCCAAAATCATAGCCTAGAAGACAGGGCAATGTGGAATCTGCAAATAAAGCCTTAAGTT
A_73_114555|534326	0.0436608	0.0105356	up	3.86295	3.86295	1.9497	ADGRG6	PREDICTED: Bos taurus adhesion G protein-coupled receptor G6 (ADGRG6), transcript variant X3, mRNA [XM_614057]	ACATCGATCATTCCTGTCCATCAGGTCATTGATAAGGTCAAGGGTTATTGCAATGCTCAT
A_73_100385,A_73_P109846,A_73_P154502,A_73_P252656|614988	0.026941	0.00387363	up	3.82387	3.82387	1.93503	TPPP3	Bos taurus tubulin polymerization promoting protein family member 3 (TPPP3), mRNA [NM_001034774]///Hw_loin_56_050811_E12 Bos taurus CF-24-HW loin cDNA library Bos taurus cDNA, mRNA sequence [DV798727]	TGCTCTGGCCAAGTGCCTAATTCTTTCCTGGACCTCAATAAAGACACCTTTTGTACCAAT///TAAGCTGCTGCTCTGGCCAAGTGCCTAATTCTTTCCTGGACCTCAATAAAGACACCTTTT///CCCTCTTCTTGTTAAAATGTTTCCAATTGTCTTGTCGGGGTTAAAATATTAGATGGGTTT///ATTGCTGGGCGGCAGGACATCCTGGATGACAGTGGCTACGTGAGTGCCTACAAGAATGCA
A_73_P050266|788085	0.0225006	0.00232604	up	3.81573	3.81573	1.93196	TMEM158	Bos taurus transmembrane protein 158 (TMEM158), mRNA [NM_001081626]	AAGTCGATCTATCCAGTGACGTGGCCAGATGGGCGTTTCTTCTTGTACTCTGTGTTTTTT
A_73_119506,A_73_P251961|538445	0.014751	5.27597e-05	up	3.80919	3.80919	1.92948	RNF138	Bos taurus ring finger protein 138 (RNF138), mRNA [NM_001038174]	AGAATCTTTTCAAGTAAACATTTGAAGGCTGTAGACACCTCTGCATCTTTGTACCTGCAA///GAATACAGGTTCTTCTGGGCATCCTACTTTTAAGTGTCCCTTGTGTCAAGAATCAAATTT
A_73_P109101,A_73_117851|281605	0.0466075	0.011846	up	3.80753	3.80753	1.92886	ADRB2	Bos taurus adrenoceptor beta 2 (ADRB2), mRNA [NM_174231]	AATATACATCCTTCTAAACTGGTTGGGCTACATCAACTCCGCTTTCAATCCCCTTATCTA///TTGTAGGCAGGGACTTGAGGGGCAGCTTTGGTTGTTTTCCTGAGCAAAGTCTAAAGTTTA
A_73_114787	0.0313439	0.00538395	up	3.80337	3.80337	1.92728		Rep: Nucleoporin 88kDa - Bos taurus (Bovine), partial (8%) [TC442860]	GGCGGGATCAACTCAGATTTATAATAGTCATTTCTTCCCCTGGTCTAATCAAAAGTAGGT
A_73_P076116,A_73_P459856,A_73_P046561|540848	0.0420796	0.00979866	up	3.80289	3.80289	1.9271	B3GNT6	Bos taurus UDP-GlcNAc:betaGal beta-1,3-N-acetylglucosaminyltransferase 6 (B3GNT6), mRNA [NM_001103307]	TATGGACTAACCTGGAATACTCAGCTCAAACTGCTGAGAAGAACAAAATAAACTTTTATG///TAACAACCAAAAATATCTCTGAAGTTTGCCACATGTACCCTGGTGAGTGGGGCTTCTCTG///GAGCAGGGGTGCTTATGGACTAACCTGGAATACTCAGCTCAAACTGCTGAGAAGAAAAAA
A_73_108581,A_73_P384886|515029	0.017321	0.000812919	up	3.79647	3.79647	1.92466	UPP1	Bos taurus uridine phosphorylase 1 (UPP1), mRNA [NM_001098976]	CAGCGGCTAGTAGGCCAATTCATCAAGAAGCGCCTGATGCAGGCCTGATCCCCCAACATT///ATGGGCGTCCCCTCCATCGCTATCATGCTGCATGAGCTCATCAAGCTGCTGTACCATGCT
A_73_107985|507627	0.01745	0.000852562	up	3.78566	3.78566	1.92054	SLAMF9	Bos taurus SLAM family member 9 (SLAMF9), mRNA [NM_001302662]	GGATCAAAGGGCGGGCATCTCAAGGGCCATGCTCCCAGAGGGATGATTGTCTGGCAATAA
A_73_P034216|404548	0.037235	0.00778503	up	3.78484	3.78484	1.92023	SEC16B	Bos taurus SEC16 homolog B, endoplasmic reticulum export factor (SEC16B), mRNA [NM_206971]	CAAGTTAGATTGCTGTAGGCATCATATTGTCATGGTAACTACTGAACCTAATGATGCAGA
A_73_P105876,A_73_P082346,A_73_P082341,A_73_P109261,A_73_106334|337925	0.0353669	0.00695726	up	3.75963	3.75963	1.91059	SLC8A1	Rep: SLC8A1 protein - Bos taurus (Bovine), partial (36%) [TC480952]///Bos taurus solute carrier family 8 member A1 (SLC8A1), mRNA [NM_176632]///solute carrier family 8 member A1 [Source:HGNC Symbol;Acc:HGNC:11068] [ENSBTAT00000018452]	GGTGCACTAATTGTGCTGTTCCTTATAAATGGTACACATTATTGACACAGACAAATAAAG///TTCTGAGAACATCTGGAGCACGTGGAAATGTTATCGTTCCCTATAAGACCATTGAGGGGA///TTTTCTGTCACTCTCTTCACCATTTTTGCTTTCATCAATGTGGGGGTGCTGCTGTATCGG///TCACAATAACAGATGAATATGATGACAAGCAGCCACTGACCAGCAAAGAGGAGGAAGAGA///ACAAAGTCCTTTCTTATCTCTTCAGCGCTGGACTGTGATTAGCAAGGCCCTGATTCTGAT
A_73_P225187	0.0305697	0.00509108	up	3.75581	3.75581	1.90913			TATTAAGGTACAGGCCCAGCTCCTTTTCCTTCTTGCTGCCCATGTCATATGGATATTGGA
A_73_102756|786492	0.0193919	0.00132682	up	3.74984	3.74984	1.90683	LGALS3	Bos taurus galectin 3 (LGALS3), mRNA [NM_001102341]	TGACATAACTCTGACCAGTGCTTCGCACACTATGATATAATCTTAAATGGGCAGATACTT
A_73_104480,A_73_P300231|513010	0.0256841	0.00346388	up	3.74617	3.74617	1.90542	CREB3L3	Bos taurus cAMP responsive element binding protein 3 like 3 (CREB3L3), mRNA [NM_001034432]	CCCAGAGCACGGGGTGAGCCTTAAACTTCGGCGCTGCCATGACCCACAAACTTTTCCTTT///TATGAGGAGCGAATGCTGAAAAAGATCCGCCGGAAAATCCGAAACAAACAGTCAGCTCAA
A_73_P263711,A_73_104179,A_73_P106101,A_73_106727|535183	0.0221374	0.00219391	up	3.74197	3.74197	1.9038	ZEB1	Bos taurus zinc finger E-box binding homeobox 1 (ZEB1), mRNA [NM_001206590]	GCACTGAATGTGGAAAAGCTTTCAAATACAAACACCATCTAAAAGAGCACTTAAGAATCC///TGGTCATTTTCTAGTTTTTTACCAGACTCCCCATCTCACAATAAAATGCATCAACAAGCC///AATCATCATTAACTACAGTCTTGAACAACCTAGCCAACTTCAAGTTGTTCCTCAGAATTT///AGTGGAAATCAGGATGAAAGGCAAGACACTAGCTCAGAAGGAGTATCCAACGTAGAGGAT
A_73_118246,A_73_P290566,A_73_P073546|407183	0.016465	0.000606381	up	3.73819	3.73819	1.90234	PFKFB3	Bos taurus 6-phosphofructo-2-kinase/fructose-2,6-biphosphatase 3 (PFKFB3), mRNA [NM_001077837]	AAGCTGTGCCAGCTTTCAAACGGAAAGCCTGTCGGAAATTTGTATATTTTGCAGTTGCCA///TTGTAGAAGAAAAATGCATGTTTCTCTGATTGGGACTCAGTGGGGAGCAGGGACAGGATT///TTCATGAAGAGAATTAACTGCTATGAGGCCAGTTACCAGCCCCTCGACCCTGATAAATGT
A_73_P281241	0.018312	0.00104321	up	3.73314	3.73314	1.90039		PREDICTED: Bos taurus leucine-rich repeats and immunoglobulin-like domains 1 (LRIG1), partial mRNA [XM_582085]	TGTGAATTTGCTGCTTCTGAGAGGCAATGTGAAAGAGGAAGTATTACTTTTATGTACAGT
A_73_P492433	0.0247249	0.00309816	up	3.72965	3.72965	1.89904		GB	TTTTCACAGGAAATAGGCCTGGCATCTCTGGGAGCATCGGATGAAGATGTTCAGAAACTA
A_73_P087591,A_73_106688|539757	0.0230865	0.00251309	up	3.72701	3.72701	1.89802	NIPAL1	Bos taurus NIPA like domain containing 1 (NIPAL1), mRNA [NM_001192302]	ACAGACTGTTCAGTGCCAGGATTCGATGATGACATTACCTTGTATAGCAGGACTGGTCAA///ACTGTTCAGTGCCAGGATTCGATGATGACATTACCTTGTATAGCAGGACTGGTCAAAATC
A_73_104263|508269	0.014751	6.54265e-05	up	3.70408	3.70408	1.88912	TMEM106A	Bos taurus transmembrane protein 106A (TMEM106A), mRNA [NM_001014870]	AACAGCATGAAAGTCCATGTAGTCCAGGCTGGAGCTTGTGCTGTGTAGAGTTTGGAAAAT
A_73_P092956|540863	0.0330025	0.00604623	up	3.7027	3.7027	1.88858	CCDC18	coiled-coil domain containing 18 [Source:HGNC Symbol;Acc:HGNC:30370] [ENSBTAT00000026887]	GACTTCAGTACTCTGAGTGGAATGCTAAGATACATAAACAAAGAAGTGCGACTATTAAAA
A_73_117451	0.0166911	0.000700489	up	3.70182	3.70182	1.88824			TTGATCTCCATAAAACCCTATCATCCCAAATAAGGATGGCATTCACAGCTCCATTCCAAA
A_73_P031846,A_73_P413096|504991	0.0292223	0.00462948	up	3.70009	3.70009	1.88756	ANKRD22	Bos taurus ankyrin repeat domain 22 (ANKRD22), mRNA [NM_001081579]	GCATCTCGAGATGTTTTGCTATCAGTTTACAAATTAGAGCCATCTTGATTTCAAACATGA///TATGGCTGCACTGCACTACACTATGCCTGTGAAATGAAAAACCAAACGCTCATTCCTCTG
A_73_119181,A_73_P251341|515900	0.0270196	0.00390043	up	3.69011	3.69011	1.88367	PLA1A	Bos taurus phospholipase A1 member A (PLA1A), mRNA [NM_001015610]	CCATATGCTTGGACAACTGTACCTAGGATTCAGTAGAAACATATACAGGAGAAATACTTT///TGTCTGGATTGTTTCAACCCTTTTCTTCTTTCCTGTCCAAGAATCGGGCTGGTGGAACAA
A_73_116856	0.021831	0.00212676	up	3.66828	3.66828	1.8751		Rep: Zgc:103717 - Danio rerio (Zebrafish) (Brachydanio rerio), partial (69%) [TC398505]	TGTAAGTCCTTGCATCTGTGGTGCTAGGTGAGTGTGAGAAGGTGTCAAGGACTGAAAAAA
A_73_P063416|505750	0.0473349	0.0121588	up	3.66517	3.66517	1.87388	LRIG1	leucine rich repeats and immunoglobulin like domains 1 [Source:HGNC Symbol;Acc:HGNC:17360] [ENSBTAT00000030750]	GTCAGCACTTGCTTCTTTCCAACGGACACATCCCCCAAGCCTGTGACTCTGGTTCCGAGT
A_73_112170|281407	0.0172506	0.000782389	up	3.66159	3.66159	1.87247	PLAT	Bos taurus plasminogen activator, tissue type (PLAT), mRNA [NM_174146]	GTTTGTACTCTGTTGCCACTACCTGTATGATACCGTACTGGAATAATAAATTCTGATATA
A_73_P416111,A_73_P031051,A_73_P106956,A_73_P110410,A_73_P091516,A_73_P091471|751808	0.017321	0.000810184	up	3.65445	3.65445	1.86965	WC-7	Bos taurus WC1 isolate CH149 (WC-7), mRNA [NM_001281912]	TATAATGACACCTTCTCTCATGACCAGGATATTGGAGCAGTCTGCTCAAGATCTGTGCGT///TATGAAGATACTCTTGCTGAAGCTGTGTATGAGGAGCTCGATTACCTTCTGACCCAGAAG///ATCTAGCTATGAAGATGCTCTTGCTGAAGCTGTGTATGAGGAGCTCGATTACCTTCTGAC///TTGTTTGTTCAGCATACTCAGAAGTCCGACTCATGACAAATGGCTCCTCTCAATGTGAGG///TCTTCTGTTGGTCTCAGGGAAGGTTCTAGACCCCGATGGGTGGATGGAATCCGCTGTCAG///TTGGAAGCCGTGAGGGCTGCGACATTCGGCCCTGGAAATGGGAGCATCTGGCTGGATGAG
A_73_P433346,A_73_P326706,A_73_101531|514339	0.016629	0.000669277	up	3.65118	3.65118	1.86836	SLC6A12	Bos taurus solute carrier family 6 member 12 (SLC6A12), mRNA [NM_001101994]	TGTGGTCTTCTCCATCCTGGGCTTCATGTCCCGGGAGCAGGGGGTGCCCATCTCTGAAGT///TCTCCTGCCTTGTTAACAAGCCCCATGGAGCGCTTGCTGCATGTGCCAACCTTTAAAAAA///CCTGGCCACTTTTTTCTTCTCCTTGAGCAAGTACACACCTCTCAAATACAACAACGTCTA
A_73_107277	0.0161901	0.00052541	up	3.64216	3.64216	1.86479		Rep: LOC506727 protein - Bos Taurus, complete [TC394932]	TTGGGGAATAAAGCAGTACAGTTTCTGACCATTTAGAGATTATAGTCTAGTGAGTGAGAC
A_73_P159902|517354	0.0162642	0.000569948	up	3.63133	3.63133	1.8605	CX3CL1	PREDICTED: Bos taurus chemokine (C-X3-C motif) ligand 1 (CX3CL1), mRNA [XM_595523]	TCCTTTGCAGACAGATGCTGAGAGAGTGCACATGCGGCTCTGGTCCACAGAGAGAGGGAA
A_73_P115606	0.019308	0.00129366	up	3.62731	3.62731	1.8589		Rep: Early endosome antigen 1 (Endosome-associated protein p162) (Zinc finger FYVE domain-containing protein 2). - Bos Taurus, partial (21%) [TC436819]	TGTCTGTGATGGATGTTTCAATGACTTGCAAGGATAATGGGTTATCACAACTTCAAAGTA
A_73_P115776	0.0161901	0.000395093	up	3.62113	3.62113	1.85644		PREDICTED: Bos taurus antigen WC1.1-like (LOC107132521), mRNA [XM_015463496]	TGAGACTCAAGGGAGGAGACAGTGAGTGCTCAGGGCAGGTGGAGGTTTGGCACAGCGGCT
A_73_107711	0.0154489	0.000128653	up	3.61799	3.61799	1.85519		Rep: Hexokinase-2 - Sus scrofa (Pig), partial (24%) [TC432931]	TCTCAAACCCTTGAGCACTCAGTCTAGTGAAGATGTTGTCATGTACAATAAAGAACTAGT
A_73_P041506|618701	0.0236653	0.00275158	up	3.61515	3.61515	1.85406	LOC618701	Bos taurus uncharacterized LOC618701 (LOC618701), mRNA [NM_001099723]	AAGAATAAAGTCTTGGAGTTTTTGGCCAAGGTCAATGATACAGTCCCTGATGCCTGCCTG
A_73_P095261,A_73_112151|509774	0.0162939	0.000580287	up	3.61197	3.61197	1.85279	RNF19B	Bos taurus ring finger protein 19B (RNF19B), mRNA [NM_001205662]	CCGCGCCTCCTCAGCTGCCCGCACCGCTCGTGCCGGGACTGCCTCCGCCACTACCTGCGC///TATGGTGGCAATCCGTGAGGTGTGTCAAAGAGTGTACAGATGTATGTGTGTATATTGTAT
A_73_P081321	0.0371241	0.0076722	up	3.60921	3.60921	1.85168		kelch like family member 32 [Source:HGNC Symbol;Acc:HGNC:21221] [ENSBTAT00000006977]	ACTGGGCATGAAAATACTCAGTGCTCAATGCTTCCTTGTTCTGTTTTCTAGATCTTATTA
A_73_109398,A_73_P092251,A_73_P100586|522383	0.0155841	0.000276537	up	3.60037	3.60037	1.84814	NES	Bos taurus nestin (NES), mRNA [NM_001206591]	CCTCCATAGACCTGCCATGTTGTGGCCCCGTCTGGCTCATCCCCGCCTGAATAAAGTAAT///TTCCTGAAGTTCAGTCAGAGAGAAGGTGATGGAGACTCCTGGTCCTCAGGGGAGGACTAG///AAGCGGTTCCAAGGCTTCCCTCAGCTTTCTGGACCCTAAGCTGGAGCTACATTTCCCTGG
A_73_P291166,A_73_P078201|536628	0.0170598	0.000751129	up	3.59495	3.59495	1.84597	ACSL4	acyl-CoA synthetase long-chain family member 4 [Source:HGNC Symbol;Acc:HGNC:3571] [ENSBTAT00000054636]	GTCCCGGAAATCATGGATAGAATTTATAAGAATGTTATGAGCAAAGTCCAAGAGATGAAT///ATACCATGAAACTGGAGCGATTTGAAATCCCAATCAAGGTTCGATTAAGCCCAGAGCCCT
A_73_101002	0.0398665	0.00889345	up	3.59055	3.59055	1.8442		tescalcin [Source:HGNC Symbol;Acc:HGNC:26065] [ENSBTAT00000061490]	GCTCATCTCGTTTTCCCGCAGGGTATGGTGTGTGGGACTTTGGTGTTTTTATCTCTAATA
A_73_P125736,A_73_P065616|616129	0.0288177	0.00451642	up	3.58336	3.58336	1.84131	HOXB2	Bos taurus homeobox B2 (HOXB2), mRNA [NM_001191335]	TGGACTTCTTCACCAGCACGCTGTGTGCCATCGACCTGCAGTTCCCTTAATAACCCGCTT///GGAGACATTTCAAACTTCATCAATCAAGGAGTCGACATTAATTCCTCCTCCTCCTCCTTT
A_73_P065771|515301	0.0368546	0.00755012	up	3.58311	3.58311	1.84121	CDC6	Bos taurus cell division cycle 6 (CDC6), mRNA [NM_001192407]	CGATGGAGTCTTCATTTTAGTACTTTATACACTCAGGTCTGAAAGCAAGTGACCTTTTTT
A_73_115374	0.0398081	0.00887181	up	3.5754	3.5754	1.83811		Rep: Protein FAM19A1 precursor (Chemokine-like protein TAFA-1). - Takifugu rubripes, partial (11%) [TC435271]	CTGGGAAGACTGTCCTTATTCTTTCTGTCATCCAACCCTCAGCTCAGGCCAGCTCAGGTT
A_73_P070811|506353	0.0391908	0.00862428	up	3.57334	3.57334	1.83727	KNTC1	Bos taurus kinetochore associated 1 (KNTC1), mRNA [NM_001192091]	TTTATAACTGAATATTACAAGCATTGTGGGAAGCCCATACCACCAGGCACCACTCCCTGT
A_73_107533,A_73_P216612|538436	0.018354	0.00105336	up	3.55738	3.55738	1.83081	CCNE2	Bos taurus cyclin E2 (CCNE2), mRNA [NM_001015665]	ACACTTGACCTAAACTTCTATTTTCTTAAGGCAGAAAAGCAGTAAATGTATACTGACTCC///AACAGCAGTACTTGTTTACAAAGATGACTTCATTCCCAATACTGGCTGGATAAAAGCCAG
A_73_P442411,A_73_117746|539378	0.0448035	0.0110347	up	3.5571	3.5571	1.8307	SACS	sacsin molecular chaperone [Source:HGNC Symbol;Acc:HGNC:10519] [ENSBTAT00000002433]	AACAACTGCAGGAATGTGTGCAACATCACGACACTGGATGAAGATATGGTCAGGACTAGA///AGGTTCACGTCTGAGGTTGCCATGAGGGTGATGGAATGTACTGCCTGTATCATCATAAAA
A_73_115575|511966	0.0162981	0.000581114	up	3.55554	3.55554	1.83007	C2CD2L	Bos taurus C2CD2 like (C2CD2L), mRNA [NM_001105358]	TTGCCCCTCTGTATAGTGGGAGATGATGATGTCCATTGCTGTGTGATGGCTTGGAATTTA
A_73_P421496,A_73_110414|618849	0.0198212	0.00145795	up	3.55206	3.55206	1.82865	HMGA1	Bos taurus high mobility group AT-hook 1 (HMGA1), mRNA [NM_001076523]	CCGGAAAACCACCACAACTCCAGGGAGAAAACCAAGGGGCAGACCCAAAAAACTGGAGAA///CATTATTTGTCCCAGCCTGGGGCTCCCCTCTGGTTTCCTATTTGCAGTTACTTGAATAAA
A_73_P422206,A_73_P047316,A_73_P376781|100140639	0.0311421	0.00531675	up	3.54882	3.54882	1.82734	RAD54L	Bos taurus RAD54 like (S. cerevisiae) (RAD54L), mRNA [NM_001130766]	AAGGTACTTATATGTTCGCTTAGATGGCACGATGTCCATTAAGAAGCGAGCCAAGGTTGT///TTTTCTCTTGGCGAATTGAAGGAGCTGTTTACCTTGGATGAGGCTAAGCTCAGTGACACA///TCTATGACAAGTGTGTGGAAGAGGAAGATGGCTTTGAAGGTACCTTGGACATATTTCCCC
A_73_P245286,A_73_107607|514688	0.0293063	0.00465831	up	3.54465	3.54465	1.82564	PPP1R15A	Bos taurus protein phosphatase 1 regulatory subunit 15A (PPP1R15A), mRNA [NM_001046178]	TATCGACCAGGAGAAGACACGGAGGAAGAAGATGAGTATGAGGACGAAGATAATGAATCA///GTAGTTTTTGTGTTAACTATTTATTTATTTGAATGTAGGTTTATATAATAAATAAAGCTT
A_73_118868|614322	0.0364278	0.007378	up	3.54306	3.54306	1.82499	RUNDC3A	Bos taurus RUN domain containing 3A (RUNDC3A), mRNA [NM_001076322]	TCAGGAAGCTGCTTCTTCCGGTGACCCCGATGCCTGGTTAGCTCCCAGCTGGACTCTCCT
A_73_P047636,A_73_P378296|506727	0.014751	5.39361e-05	up	3.54019	3.54019	1.82383	NFKBIE	Bos taurus NFKB inhibitor epsilon (NFKBIE), mRNA [NM_001130746]	CTTCTGGGGAAGGGGAAGTTCAATAACATGACACTAAAACGGCAGAGACTTTTAACTCCC///TTGGACATTCAGAACAACCTTTACCAGACAGCACTTCATTTGGCTGTACATCTGGACCAG
A_73_113353	0.0185018	0.0010982	up	3.53997	3.53997	1.82374		LB02725.CR_D08 GC_BGC-27 Bos taurus cDNA clone IMAGE:8315482, mRNA sequence [DV892904]	CTATCTTGTGTGCACTAGAAATCAGTTGCTTGATGGTAGCTATTAAACCTAAGATTACTG
A_73_119086	0.0161901	0.000507008	up	3.53831	3.53831	1.82306		Rep: Insulin-like growth factor-binding protein-like 1 precursor - Bos taurus (Bovine), partial (45%) [TC463369]	TTCCCAGCTCCAGATGACCGCCTATGATGGGGGCACGTGTGTGTTTCGAGTCATCTGAGT
A_73_P034132,A_73_P276016|505987	0.019192	0.0012606	up	3.53401	3.53401	1.82131	GK	Bos taurus glycerol kinase (GK), mRNA [NM_001075236]	GGAGAGAATCCAGTGATTCAGTCTCTTAATGTGACGACACTATTCATAAACTGATTTTAT///ACTATGTAATACAGGCCGTAAGTGTGTATTTTCTGAACATGGCCTTCTGACAACAGTGGC
A_73_P169364,A_73_P203047,A_73_P044891,A_73_P494510|534910	0.010729	3.04584e-06	up	3.53309	3.53309	1.82093	CD200	Hw_FAT_14_050513_C01 Bos taurus CF-24-HW fat cDNA library Bos taurus cDNA, mRNA sequence [DV775461]///Bos taurus CD200 molecule (CD200), mRNA [NM_001034620]	CATTGGACCAAGCTGGTGACTTTTTCAGTATCTTTTGCTTTCTTGTCTGTATCCAGTGAC///CACTCTCTTTGTACAGCCGACAGTATTCCTTCACTATCAACTATCTGAATATCACCTAAA///TAATTCTTCTGGTCTTAATCTCAATTCTACTCTACTGGAAACGTCATCGGAACCAAGATC///CAGTATCTTTTGCTTTCTTGTCTGTATCCAGTGACTTAGGAACTAAAACTTAAGTTGTCT
A_73_119412,A_73_P098776,A_73_P101206|282871	0.0196161	0.00138103	up	3.52542	3.52542	1.8178	MMP9	Bos taurus matrix metallopeptidase 9 (MMP9), mRNA [NM_174744]	GGGAGGTGGGCTGGGCCCTCTCTTCCCACCTTCCTTTCTTATTAGAATGTATTTAATAAA///AAAGTTGTGGTCTCTGGGCAAAGGCGTTGTGATCCCGACCTACTTCGGAAACGCGAAGGG///AAGATTTTCTTCTTCTCTGGGCGCCAAGTATGGGTGTACACCGGCGCGTCGTTGCTAGGC
A_73_P079071,A_73_P102501|282856	0.0181487	0.0009984	up	3.51912	3.51912	1.81521	PCK2	Bos taurus phosphoenolpyruvate carboxykinase 2, mitochondrial (PCK2), mRNA [NM_001205594]///Rep: Phosphoenolpyruvate carboxykinase - Bos Taurus, complete [TC425177]	TAGGCTTGCAGAAACTATGAGCAACTTAACAACACTCTCATCCTCTGGGTGCTATGGGAT///CAGGCCCCAGAGCTTTCCCCACATGCTGCCTAATAATGAAATGCTCATTTATATAAAAAA
A_73_103486	0.0197036	0.00142627	up	3.51157	3.51157	1.81212		Rep: Chromosome undetermined scaffold_67, whole genome shotgun sequence - Paramecium tetraurelia, partial (4%) [TC422578]	AATATATTGTTTGTATGTTTCTCTTCTTGCCTTCTGTTATAAGTCTCTTCCTTTCTCAAA
A_73_117773|520351	0.0169822	0.000742831	up	3.50919	3.50919	1.81114	NXT1	Bos taurus nuclear transport factor 2 like export factor 1 (NXT1), mRNA [NM_001075805]	TTTTGAAGTAGTAAAATTCTCTATTTTTCTATTTGCCCAGGAGAGACTCTGGTTCTGGAA
A_73_P395506,A_73_P049851|784362	0.0188405	0.00115921	up	3.50746	3.50746	1.81043	SCEL	Bos taurus sciellin (SCEL), mRNA [NM_001102332]	CCTGGACAGTCTTATTAAAGTGACTCCCTCAGCAAAGAAAAGCAGTGAACAAGGTCTTGA///GTTCTTTAGCATGCTGTACCTATTCCTACTACATAGCATTTTATATTTACAGATGGCTTG
A_73_P037331|404082	0.0230447	0.00247982	up	3.50324	3.50324	1.80869	TMEM176A	Bos taurus transmembrane protein 176A (TMEM176A), mRNA [NM_205779]	TACAGACGTAAGGAGAAAAGAGACCTTCCCTTGGAAGAAACTGTCAGGAGTGAGTGAGAT
A_73_104159	0.0217106	0.0020942	up	3.49839	3.49839	1.80669		Rep: PDZ domain-containing RING finger protein 3 - Homo sapiens (Human), partial (19%) [TC417712]	CTATGTTTTGAAGTGTTCCTCATTTTGCAGTGGTGCCTATAAAATAAAAGCCTTTTTTGC
A_73_P166662	0.0267139	0.00381148	up	3.49814	3.49814	1.80659		Ras association domain family member 6 [Source:HGNC Symbol;Acc:HGNC:20796] [ENSBTAT00000015836]	ATAGACTCCTACAGGGACCGTCCAAAACAAACGCTCGCATTTTCCTCATGGATAAAGATG
A_73_P081658|100850276	0.0164245	0.00060066	up	3.48803	3.48803	1.80241	LOC100850276	PREDICTED: Bos taurus NKG2D ligand 3-like (LOC100850276), transcript variant X1, mRNA [XM_005211029]	AAATGTATATTTCACCATATCCCAACAGTAGGTCATGTATTCATCCTACTATGCAGCCAT
A_73_P042201|511199	0.0347763	0.00672295	up	3.47717	3.47717	1.79791	LDLRAP1	Bos taurus low density lipoprotein receptor adaptor protein 1 (LDLRAP1), mRNA [NM_001083668]	TTCAAAGTTGCCTTTGAGTTGTGGCAGGTATCCAAGGAAGAGAAGGAGAAGAGGGAGAAA
A_73_P282306,A_73_100761|520842	0.0155841	0.000170867	up	3.47328	3.47328	1.7963	KLF4	Bos taurus Kruppel like factor 4 (KLF4), mRNA [NM_001105385]	AGGAAACCAAAAGACAAACTCAAGGAAAAAACAAACAGATGGGGTCTGTGACTGGATCTT///TTATGCACTGTGGTTTCAGATGTGCAATAATTTGTACAATGGTTTATTCCCAAGTATGCC
A_73_117800|539935	0.0155841	0.000220288	up	3.4694	3.4694	1.79469	GJB3	Bos taurus gap junction protein beta 3 (GJB3), mRNA [NM_001104995]	CCTTTCAGGGACTTGAGATGGATGTACTGATAGGAACATCCCCAAGGCATTTTCCTTGAA
A_73_106855	0.0324234	0.00583376	up	3.45949	3.45949	1.79056		Rep: Reverse transcriptase-like - Bos taurus (Bovine), partial (32%) [TC431374]	TTTTGTCACCCCTATTGTTTGTGCTATCTCTAATAAAAGCCATTGTTGATCACCGAAAAA
A_73_112165	0.0177678	0.000927005	up	3.45513	3.45513	1.78874			CACCCTGCCTCCATCCTGTATCATAGGTGGGAAATTAAACAGCTTTGTGAGCCTCAAAAA
A_73_P278411,A_73_113701|538280	0.0233457	0.00263493	up	3.45325	3.45325	1.78795	SERPINA11	Bos taurus serpin family A member 11 (SERPINA11), mRNA [NM_001099083]	ATTTGCACCTGCCAAAGTTTTCCATTTCTGGAACATATAACCTGAAAGAGATACTTCCCC///CTGCTGTGAGGACCAGTGAATCAGTGTGCAAAGATGCTAATAAAGTTGACCCTGGGTTTT
A_73_116866	0.0492194	0.0130137	up	3.4471	3.4471	1.78538			CTGAGAATTTGCACTTTAAGTATTTGTGTGCGTGGTTTTAGCCAAATGAAGTGTTATCAG
A_73_P068391	0.0194515	0.00134922	up	3.44596	3.44596	1.7849		calcium voltage-gated channel auxiliary subunit gamma 8 [Source:HGNC Symbol;Acc:HGNC:13628] [ENSBTAT00000009879]	AGAAGAACCACTACTCATACGGCTGGTCCTTCTACTTCGGCGGGCTGTCGTTCATCCTGG
A_73_P091541,A_73_P091536,A_73_P115766|514534	0.0238028	0.00280938	up	3.44518	3.44518	1.78458	WC1.3	Bos taurus WC1.3 molecule (WC1.3), mRNA [NM_001190424]	TATGAAGATGCTCTTGCTGAAGCCGTGTATGAAGAGCTCGATTACCTTGTGACACAGAAG///AGTCCGATTTCACTGCTTGGGTGCAGAGTCCTTCCTGTGGAGTTGCCCTGTGACTGCCTT///AAGGAGGATGCTGGTGTGAGGTGCTCTGGTGCAAGAACATCTTTGCCCCCGACTACAGCA
A_73_P069106|535927	0.0443883	0.0108185	up	3.43852	3.43852	1.78179	TBC1D2B	TBC1 domain family member 2B [Source:HGNC Symbol;Acc:HGNC:29183] [ENSBTAT00000015943]	ATGTCCATATTCAAGTACCTCCGTTACTTCACACGTACTATCCTGGATGCTAGGAAGCTC
A_73_103455	0.010729	3.26582e-06	up	3.42824	3.42824	1.77747		Rep: Suppressor of T-cell receptor signaling 1 (Sts-1) (Cbl-interacting protein p70). - Canis familiaris, partial (29%) [TC482003]	AGGGCGTGAAGGACCAGATGTAGCCCAAAGACAGTTGTCCATATTGGTGGAAGTCAAGCT
A_73_106700|541168	0.0253961	0.00334464	up	3.4278	3.4278	1.77728	SLC25A31	Bos taurus solute carrier family 25 member 31 (SLC25A31), mRNA [NM_001046500]	CTTCTCCAACATCCTTCGTGGCACAGGGGGTGCTTTGGTCTTGGTATTGTATGATAAAAT
A_73_P055206|786490	0.0292208	0.00462739	up	3.41808	3.41808	1.77319	EMP1	epithelial membrane protein 1 [Source:HGNC Symbol;Acc:HGNC:3333] [ENSBTAT00000050559]	TCGGCATCCTTTATCTGGTCCTGAGAAAGAAATAAGGCTGAACACATTTACTGGGGACCT
A_73_P039456,A_73_P140466|511749	0.0155841	0.000235956	up	3.4172	3.4172	1.77282	LTC4S	Bos taurus leukotriene C4 synthase (LTC4S), mRNA [NM_001046098]	GACGGATCTGCAGTTGAGCCGGAGCCTCCTCCAGTTTCTCATTAAAGCGTCCATGACAGG///ATCTTCTTTCACGAAGGTGCGGCAGCACTGTGTGGTCTGGTCTACCTGTTCGCACGCCTA
A_73_116017|529053	0.0193036	0.00128771	up	3.41651	3.41651	1.77252	DNALI1	Bos taurus dynein axonemal light intermediate chain 1 (DNALI1), mRNA [NM_001191299]	AGTTCCTGAAGCGGACGAATCAGCAGCTCAAGGCCCAACTGGAAGGCATTATTGCGCCAA
A_73_110958	0.0200172	0.00154962	up	3.41585	3.41585	1.77225		PREDICTED: Bos taurus microtubule associated serine/threonine kinase like (MASTL), transcript variant X1, mRNA [XM_010811135]	CATTGAGGTTTTCTGCATACTTACCCACCAAAAGAGAAAAACTCAAATTTAAATGTACCG
A_73_109944	0.0206326	0.00177377	up	3.41439	3.41439	1.77163			GACTGCTTTTGAAGGAGCTACAGCTACACCTGGAAGACACACTAAATATTTATTATACTA
A_73_P052251,A_73_P117421|281667	0.0162755	0.000579013	up	3.41034	3.41034	1.76991	CCNA2	Bos taurus cyclin A2 (CCNA2), mRNA [NM_001075123]	CTCAACCCACCAGAGACACTAAATGTGTAACAGTGAAAAGACTGCCTTTGTTTTCTAAGA///AGAGATATACCCGCCAGAAGTAGCAGAGTTTGTATACATTACAGATGACACTTATACCAA
A_73_102824|533523	0.0214482	0.00201999	up	3.40976	3.40976	1.76967	DDR2	Bos taurus discoidin domain receptor tyrosine kinase 2 (DDR2), mRNA [NM_001083720]	TTTCACCTTTTGCCAGGAACAGCCCTATTCCCAACTGTCAGATGAACAGGTCATTGAGAA
A_73_P086976	0.0220254	0.00217253	up	3.40784	3.40784	1.76886		erythrocyte membrane protein band 4.1 like 4B [Source:HGNC Symbol;Acc:HGNC:19818] [ENSBTAT00000022699]	AAGCACCTGTGTGTACATATTAATAACCACAGGGGTTAATATGGCATGGAATCCTTTGCT
A_73_113646	0.0190141	0.00122434	up	3.40303	3.40303	1.76682		Rep: Signal transducer and activator of transcription 1 - Bos taurus (Bovine), complete [TC393609]	TGTTGGAGAGATCCTAATTAGAGATTTTGTGTCACTCCCTGTCAGCGTTTCACTGCCTTT
A_73_104260|528834	0.021831	0.00213194	up	3.4011	3.4011	1.766	CIDEB	Bos taurus cell death-inducing DFFA-like effector b (CIDEB), mRNA [NM_001034567]	TTGAGATCTCTCTTTCTCTGTACCCTTCCCCCTGCAACATAACAAAAGTGTTTCCAATAA
A_73_108136,A_73_P343326,A_73_P319456|518905	0.0351146	0.00685538	up	3.39303	3.39303	1.76257	SLC20A2	Bos taurus solute carrier family 20 member 2 (SLC20A2), mRNA [NM_001080280]	ACTGTGGAAATGCTGCTAAAACTTTTATATTGACAAACACTTTCTCGGTACTTCATTGTG///ATCATAGCTTTTATCTTGGCGTTTTCTGTGGGTGCCAATGACGTTGCCAATTCGTTTGGT///CTACCTGCCTAGACTTCAATATTCAACAAATCTTTGTACATACCGATTTCAGCGGCAGAT
A_73_P038581,A_73_P210427,A_73_102684,A_73_P400026|415113	0.0155841	0.000171506	up	3.39081	3.39081	1.76163	HSPA5	Bos taurus heat shock protein family A (Hsp70) member 5 (HSPA5), mRNA [NM_001075148]	TAGAAGAAATTGTTCAGCCAATTATCAGCAAACTCTATGGAAGTGCAGGCCCTCCCCCAA///AACTGTTACCATCAAGGTCTATGAAGGTGAACGACCCCTGACGAAAGACAATCACCTTCT///ATTTAACAATTGGGTCATGTGTATCTGGTGTAGGAACTTTTTTCTACCATAAGTGACACC///TCTGATCGGCGATGCAGCCAAGAACCAGCTCACCTCCAATCCGGAGAACACAGTCTTCGA
A_73_106916	0.0353669	0.00695466	up	3.38717	3.38717	1.76008		PREDICTED: Bos taurus kelch-like 34 (Drosophila) (KLHL34), mRNA [XM_597829]	GTGGGGACGAGCAGAGGGAGGGAGAGCCGGGAGAGACACCGGATTTTGTTCTGGGCTTAA
A_73_P254081,A_73_P288306,A_73_101506,A_73_P051741|540329	0.0217946	0.00211046	up	3.38522	3.38522	1.75925	PPM1K	Bos taurus protein phosphatase, Mg2+/Mn2+ dependent 1K (PPM1K), mRNA [NM_001046474]	ATCAAGAAACTGATTAGATTTAAAAAGTGAACTGTAAGTGGTGACCCTAGAACTCACTAG///TTGTGCAGAAAAGGAAAACCCATGAAGCTGACCATCGACCACACTCCAGAAAGAAAAGAC///AACTGATTAGATTTAAAAAGTGAACTGTAAGTGGTGACCCTAGAACTCACTAGACCAGTA///GAATTTGCCATGTGGCTATTACCATGTGGGTATCGGTATGGTGTAAATTATATTAATGTA
A_73_P087916,A_73_105168,A_73_P272036|519739	0.0155841	0.00023077	up	3.37993	3.37993	1.75699	GPAT3	Bos taurus 1-acylglycerol-3-phosphate O-acyltransferase 9 (AGPAT9), mRNA [NM_001192514]	GAATTACAGCAAAATGATTGTGGGCAATGGATCTCTCAAGTCGGAACTGGACTGAATGCC///TCAGAGTGTTATTTCTCTTCTGGGAACCATGTACAAAATGTGACACTGTCTTACGGTGAA///CTCTTCTGGGAACCATGTACAAAATGTGACACTGTCTTACGGTGAATATAAATAAATTCA
A_73_100379	0.0225089	0.00233047	up	3.37961	3.37961	1.75686		Rep: Nuclear receptor coactivator 3 - Homo sapiens (Human), complete [TC398959]	TTTGAGCAGGACTGAATTTTAACCTGAAGTGTGATATCTGCCTGTTTTCTTTCCCTCCTC
A_73_P169217	0.0194515	0.00133819	up	3.37951	3.37951	1.75682		BovGen_12277 normal cattle brain Bos taurus cDNA clone RZPDp1056M096Q 5', mRNA sequence [CO883952]	TGTGTTCTGAGGTGTTATTATCTATGTTGGATATGCCACAGCTAAGTCAAGTTTCTCAAA
A_73_P041761,A_73_P463886|512633	0.0110645	6.63691e-06	up	3.37916	3.37916	1.75667	MFSD2A	Bos taurus major facilitator superfamily domain containing 2A (MFSD2A), mRNA [NM_001101959]	GCCTAGCCTGGAACACTAATGTAGAAACGTTGTATACAGAGACTAATTAATAACTTAATG///GAAAAAACAGTTGTCCATTTGCAACAAACTATGCTATGCAGTTGGGGGAGCCCCGTATCA
A_73_120079|615932	0.0222735	0.00222349	up	3.37115	3.37115	1.75324	CCNB1IP1	Bos taurus cyclin B1 interacting protein 1 (CCNB1IP1), mRNA [NM_001046565]	AACAGTTTTTTCAGTTTTGCCTCCCCAAATAATGAATTAGAGCAGCAGCCAGTCTCTAGC
A_73_P116016,A_73_P435481,A_73_P280791|533634	0.0190636	0.00123599	up	3.36128	3.36128	1.74901	OSBPL6	oxysterol binding protein like 6 [Source:HGNC Symbol;Acc:HGNC:16388] [ENSBTAT00000019160]	AAACGGGAAACGTAGAGCTAGCCGACATATCACGCTCTGAATGAATAAATAACTATGCAC///CCAGTAACATTAACCTGTGGAATATATTGAGAAACAACATTGGTAAAGACCTGTCTAAAG///GGTCCATGGAAGCATCGATGTGGGACTCTCTGTCATGTCAATTAAAAAGAAAGCTCGGAA
A_73_P105661,A_73_115690|281346	0.0160971	0.000381592	up	3.3554	3.3554	1.74648	NCF2	Bos taurus neutrophil cytosolic factor 2 (NCF2), mRNA [NM_174120]	AGGGAACATCGTCTTTGTCTTGAAGAAGGGCAATGATAACTGGGCTACGGTCATGTTCAA///TTGAAGAATTTGCTTACAAGGTTTGGCATGCCTCTGCTATACATTTGAGAGACACCTCTG
A_73_121296	0.0161901	0.000414343	up	3.34547	3.34547	1.74221		Rep: E3 SUMO-protein ligase PIAS2 - Homo sapiens (Human), partial (46%) [TC461335]	TCGGCCGTTAGAACGCTTGTTTGGAGTTCCGTGTCCTCAGTTTACCTTTTGATCGTTAAA
A_73_P039976|505103	0.0155841	0.00022823	up	3.34402	3.34402	1.74158	PHGDH	Bos taurus phosphoglycerate dehydrogenase (PHGDH), mRNA [NM_001035017]	TGCTTGTGTCTCCTCTGACTCCTATCTTTCTGTGGTACAGCAATCACCTCCCAATAAAGA
A_73_P047191,A_73_114314|414922	0.0203297	0.00168705	up	3.33695	3.33695	1.73853	CLDN1	Bos taurus claudin 1 (CLDN1), mRNA [NM_001001854]	CAATACAGAAGGGAAGCCTTTTCCATTTGTATTACTGCTTCCCACTGAGTAATCATCTCA///GCTTCCCACTGAGTAATCATCTCAAATGAGGGGAGATAGCATTCCTTAAATATATATAGA
A_73_P097201,A_73_P382206|507577	0.0154489	0.000131298	up	3.33328	3.33328	1.73694	EAF1	Bos taurus ELL associated factor 1 (EAF1), mRNA [NM_001192153]	GTGCATGTCTTTAACTTATGGTGATGGGTGATTTTCTCACGTAATTTTTGAACAATCTCA///TTACCAGAAGGACTGTGTGCTGATCATCAATCACGACACTGGAGAGTATGTGCTGGAAAA
A_73_118109|514513	0.0332917	0.00617027	up	3.32291	3.32291	1.73245	ANKRD35	Bos taurus ankyrin repeat domain 35 (ANKRD35), mRNA [NM_001192377]	CCGAACCCTGGAATCAGCATGGTTGACATCAGAGGAGGTGTGGGTGGAAGCCAGCTCTAT
A_73_P169012,A_73_117632|777788	0.015973	0.000367504	up	3.31658	3.31658	1.7297	DDIT3	Bos taurus DNA damage inducible transcript 3 (DDIT3), mRNA [NM_001078163]	GCTTAGGGTCGACGATAGAAAAGGGTCTTAGCGTGTATATAGATTGTACATTTATTTATT///TCTCCAGAGTCCAGTCAGAGCTCCCTGGCTCAGGAGGAAGAAGAGGAAGACCAAGGAAGA
A_73_P042981,A_73_P335251,A_73_P287811|100125276	0.0260438	0.00357486	up	3.31569	3.31569	1.72931	GNG4	Bos taurus G protein subunit gamma 4 (GNG4), mRNA [NM_001103324]	ACTTGTGGTTTGTGCCCTTTTCTGTATGTATGTTGTACTTCAATAAAAAGTGTGCTTAGC///TTACATCAAGTGAGAAACCCGGCAAAGCTGTTCGCAAGTAGTTATGTAAGTTACTCTTAG///TGCGTGACTTCAAAGATCCATGGTTCAGTTGGAAGAATCATATAAAATCACCCGCAAAAA
A_73_P253676,A_73_111719|507095	0.0194515	0.00134489	up	3.31439	3.31439	1.72875	SPRY1	Bos taurus sprouty RTK signaling antagonist 1 (SPRY1), mRNA [NM_001099366]	ATGACTTAAAGGGCTCCTTGAAAGAGGACCTGACGCAGCACAAGTTCATTTGTGAACAGT///GGCCACTTCGTTAGTTAACAGCTGGGTAGTTCTAATCTTTTCTGTTTCATTGCCTTAACC
A_73_P069876,A_73_P036046|767961	0.0203702	0.00169926	up	3.31405	3.31405	1.7286	NDUFAF2	Bos taurus NADH:ubiquinone oxidoreductase complex assembly factor 2 (NDUFAF2), mRNA [NM_001077029]	CCGGAGTACAAGAACTGGAGAGGACAAACTATTCGAGAGAAAAGAATTGTAGAAGCAGCA///CAAGGGCCACAGTCAATGAGCGTACTGTGGTAAAGTTTTATTTATATGTATGTGACTATT
A_73_P084276|101902412	0.0247576	0.00311707	up	3.31014	3.31014	1.72689	ANGPTL8	angiopoietin like 8 [Source:HGNC Symbol;Acc:HGNC:24933] [ENSBTAT00000045880]	ATGGTTGAGGAAGGCTGTAGGAAGGATATGCCCCTTCATGCCTACACATTCCCTATTAAA
A_73_P046926|615505	0.018989	0.00121469	up	3.30821	3.30821	1.72605	TMEM176B	Bos taurus transmembrane protein 176B (TMEM176B), mRNA [NM_001099145]	TCTTCCATTCAGTGAACAGGTATTGTCACGTTTCCCCCAGTGCTGACTAAACAGAAGCAA
A_73_115189,A_73_P110176|526704	0.0389986	0.00852622	up	3.30795	3.30795	1.72594	VNN1	Bos taurus vanin 1 (VNN1), mRNA [NM_001024556]	TGCTGAATGGGAAGGCGGAAAGAAAAAACAGCAGAGGAAAACCACGAGGATTCTTCATAA///TGCTGAATGGGAAGGCAGAAAGAAAAAAGCAGCAGAGGAAAACCATGAGGATTCTTCATA
A_73_P049676,A_73_P460101|539971	0.0261204	0.00359029	up	3.29966	3.29966	1.72232	KCNH2	Bos taurus potassium voltage-gated channel, subfamily H (eag-related), member 2 (KCNH2), mRNA [NM_001099101]	GCTTACCTATGCTATCCTGTTTTCTCTCAGTAAACAAAATGCTGGTCTTGATTCAAAAAA///GCCTGTGCTTACCTATGCTATCCTGTTTTCTCTCAGTAAACAAAATGCTGGTCTTGATTC
A_73_102586	0.0259513	0.00353083	up	3.28975	3.28975	1.71798			TAATGGCAAAAACCACAAAAATCTTTATCAAAAACTCTCTTCTTTGATCAGACTTGAGGT
A_73_113188	0.0224004	0.0022975	up	3.28814	3.28814	1.71727		Rep: Predicted protein - Physcomitrella patens subsp. patens, partial (12%) [TC423328]	TGTGTGCTCATCCCATCATTTGAAACCCTTCGTATAAAACATTGTAGTATCATTTGGAAA
A_73_120173,A_73_P034776|509964	0.0421092	0.00981261	up	3.2878	3.2878	1.71712	KANK3	Bos taurus KN motif and ankyrin repeat domains 3 (KANK3), mRNA [NM_001113763]	AGGCAGCTGAGGGAGTGACACAGCCCCTAGTCTACCCATTCCTCCAGGCTTCTTACCTAA///TCTTTCAAATGGGCAACGTTAACGCCAAGGCCAGCCAGACAGGACAGACAGCCCTCATGC
A_73_100864	0.0181976	0.00100412	up	3.28719	3.28719	1.71685		PREDICTED: Bos taurus transcription factor SOX-9-like (LOC100336535), miscRNA [XR_083993]	GAGCAGGGTCAGCCCACTGACAAACTTTAATTCCTAATTACTTCTGTGGCTGGAGAGTTT
A_73_P311981,A_73_P096386|615508	0.0443085	0.0107897	up	3.27331	3.27331	1.71075	TPRG1	Bos taurus tumor protein p63 regulated 1 (TPRG1), mRNA [NM_001193079]	ATCACAGACAAGACTCTCTTAATTTGCAAATATGACTTCATCATGCTCTGCTGTGTGCAG///TTCATTGGAAACCGAAACAAACTTGGCTATTCCCTTGCCCGGGGGAGTATTGGTTTTTGA
A_73_P115636	0.0234957	0.00267927	up	3.26059	3.26059	1.70513		PREDICTED: Bos taurus wingless-type MMTV integration site family, member 10B, transcript variant 1 (WNT10B), mRNA [XM_586498]	TGCTGCTACGTGCTGTGTGACGAGTGCAAGGTCACAGAGTGGGTCAATGTGTGTAAGTGA
A_73_P049376,A_73_112218|616168	0.0154489	0.000132473	up	3.25937	3.25937	1.70459	TCAM1	Bos taurus testicular cell adhesion molecule 1 (TCAM1), mRNA [NM_001038211]	CCAGTCTTTTCTCCCAAATCAGTTATATATGGGTCACTGAAGTGTTGGATATGATAAAAA///AGGAAATTGCCCTATAGGCAGAAGGAGAAGAACAAAGAAGAGGAAAGCCAGTTTGCTGTT
A_73_105691	0.0242725	0.00296397	up	3.25853	3.25853	1.70422		152660 MARC 4BOV Bos taurus cDNA 5', mRNA sequence [BE664798]	GAGAGAAGTCTTTGCAATAAAAAAGCTCCCCCTTTCCCTTAAAGATGTTGCAGTTTTCCT
A_73_P258181,A_73_P037121,A_73_P324326,A_73_P254421|528013	0.0154489	0.000140187	up	3.24752	3.24752	1.69934	SMTN	Bos taurus smoothelin (SMTN), mRNA [NM_001076879]	TGATGCAAACTAAGACCTTCTCCTCTTCATCATCCAAGAAGATGGGCAGTATCTTCGACC///TGTCGCGGCACCTTCCCACGCAAACACGCAGCGTTTTGATAAATTATTGGTTTTCAACGA///AACAAGATGCTGGATCAGACTACGGACTTTGAGGAGCGGAAGCTCATCCGGGCTGCACTG///ACCATGTGAGGTGCCGAAGCCAGAGGAACAGAAGCAGCAGGTGGAGGTCCCAGAGCCAAC
A_73_104714|510276	0.0154489	0.000139652	up	3.23707	3.23707	1.69469	RASSF1	Bos taurus Ras association domain family member 1 (RASSF1), mRNA [NM_001075442]	TGGGGGTGATAGTCATCAGGGCCTGGGGTCTGAGAGAAATGGCTAAATAAAGATTTAAGA
A_73_106555|541125	0.0167188	0.000715579	up	3.22557	3.22557	1.68955	ELK3	Bos taurus ELK3, ETS-domain protein (SRF accessory protein 2) (ELK3), mRNA [NM_001081542]	TTTTTGGCTTTCAACTGTATGAGAATTGCCTTAGAACCTCTTTTGAACTGAAATTCAGTG
A_73_P112131	0.0222207	0.00220584	up	3.22012	3.22012	1.68712		GB	ACATGGTAGGGTCCCTAGTTCCTTCCCAGACCTCTATGACGAGGCTCTGAGAGATCAGGC
A_73_114564,A_73_P046186|538050	0.0167188	0.000715937	up	3.20748	3.20748	1.68144	RAB7B	Bos taurus RAB7B, member RAS oncogene family (RAB7B), mRNA [NM_001078013]	TAACTGACCTGGAGTCCTTCGAAGCCCTGGAAACCTGGCGGGGTGATGTTCTGGCCAAAA///TTCAGTGGGCGTAGGGACCATTCTAAAAGTGCACAACAGATAATAAATGTCTTTCTTAGT
A_73_103897	0.0175924	0.00087018	up	3.20052	3.20052	1.67831		Rep: Taste receptor type 2 - Bos taurus (Bovine), partial (10%) [TC405774]	AAAGCACTCACATTTATCCCTGACATTGAGGCATTCAATACAATTCAGTTCTCTTGGAAA
A_73_117943,A_73_P172352|509117	0.0213233	0.00199135	up	3.2	3.2	1.67807	SPC24	Bos taurus SPC24, NDC80 kinetochore complex component (SPC24), mRNA [NM_001075391]	CACTCAGTGGGAATCAGCCGTGGTGGGTGGTCAGTGCCTTGGTGGTGAGATGAGCTTAAA///GATCTCGAAAGACAAGAGAAGGAAGTTGATGAGGACACGACAGTCACCATCCCTTCAGCT
A_73_P049256|517356	0.0297097	0.00481672	up	3.19981	3.19981	1.67799	C8G	Bos taurus complement C8 gamma chain (C8G), mRNA [NM_001110076]	AGGACCACACCCTGTTCTTCCCCAAGTACGGTTTCTGCGAGGCCGCGGACCAGTTCCACA
A_73_P476498	0.0342141	0.00652455	up	3.19545	3.19545	1.67602		Rep: Beta-2-microglobulin precursor - Bos taurus (Bovine), partial (97%) [TC408424]	CTTATTGTAATATCAGTATCCTGGGGACCATTACAGACAGCTCTAATATGATAAGCCTCA
A_73_P434721,A_73_P091391,A_73_P282516|509972	0.016629	0.000627941	up	3.1868	3.1868	1.67211	LOC509972	1384444 MARC 7BOV Bos taurus cDNA 5', mRNA sequence [DN538715]///Hw_loin_51_050810_D10 Bos taurus CF-24-HW loin cDNA library Bos taurus cDNA, mRNA sequence [DV793724]	AGAGACAGACTTACTCATTCTGTATGTCAGCTGCCCAAAAGGATGGATTGGATTTGGGAA///CTTCAAGGCGTTTTTAGGGAATTTCACACACCATCCCTAAGAGATGCATTAAAAATTGTT///AGAAGATACAAAGGCATTTTTGACCATTGGATTGGCCTTAGCAGAGAATCATCACATCAT
A_73_119813	0.0155841	0.000215579	up	3.18439	3.18439	1.67102		Rep: Phosphoheptose isomerase - Burkholderia cenocepacia MC0-3, partial (11%) [TC427844]	TGTTCCCTGATGATGTTTGTAATATGGCTGTGTTGAAAATCTATACAATAAAGCTGTGAC
A_73_110113,A_73_P043316|286849	0.0188217	0.0011481	up	3.18146	3.18146	1.66969	CD40	Bos taurus CD40 molecule (CD40), mRNA [NM_001105611]	CGAGCGGTTCATTGCTGACAGATGTCATTCGGTGGCTGCTCTGAGCCCAGGAGGCATATA///TTCTCCAACGTGTCATCTGCTTTTGAAAAGTGTCACCGTTGGACAAGCTGCGAGAGAAAA
A_73_P040591|531411	0.0405157	0.00918959	up	3.153	3.153	1.65673	ENTPD4	Bos taurus ectonucleoside triphosphate diphosphohydrolase 4 (ENTPD4), mRNA [NM_001077985]	TTCCCCTCAAAGCAAGAAACTCAGAAAAGCAAATTTGGGAAAAAATACTGAAAAATCAGG
A_73_P104011,A_73_P247586|100139916	0.0208339	0.00186368	up	3.14653	3.14653	1.65376	LOC100139916	PREDICTED: Bos taurus interleukin 32-like, transcript variant 3 (LOC100139916), mRNA [XM_001790359]	TGATATACTACTTCTCACGATAGTGAGGTTCCTCAGTTGGTATAAGGAATAAGGTTTTTT///TTAGCGTCTTAGTGCCCTCATCATCCTAAGTGACCCAGCTTGCTGTCAGCTGAGGCCCCA
A_73_P492328	0.016629	0.000657024	up	3.14153	3.14153	1.65147		190515 MARC 4BOV Bos taurus cDNA 5', mRNA sequence [BE722324]	TCTTTGACCATAAACAATGCTGCCGTGTCTGACAGTGGCTTGTATTGTTGCCGAATTGAG
A_73_113752,A_73_P049266|768073	0.0161901	0.000472999	up	3.13878	3.13878	1.6502	OSGIN1	Bos taurus oxidative stress induced growth inhibitor 1 (OSGIN1), mRNA [NM_001077129]	AGTGCCGAGCCAGGAGGACTTCCAGGCCCCGCTCTTTCCAGAATCAGGTCCCAAATAAAA///AGATGCTGTACCCCGAGTACCACAAGGTTCACCAGATGATGCGCGAGCAGTCCATCCTGT
A_73_P062956	0.0445587	0.010932	up	3.13856	3.13856	1.6501		Rep: Eukaryotic translation elongation factor 1 epsilon 1 - Bos taurus (Bovine), partial (74%) [TC401462]	TGTTACCTGAAGTAACTCAGTTTCTACCCTTTTTTCAAGCCTGTGCACTTTCTTCCCCAT
A_73_P282676,A_73_P502973,A_73_115286|506932	0.0161901	0.000449233	up	3.13701	3.13701	1.64939	CHST1	Bos taurus carbohydrate sulfotransferase 1 (CHST1), mRNA [NM_001083648]	TGGACCTTGTTTATTTCTTCCAGTCTGTGGCAACGCTGTCTGTCTGTCTGTCTGAGTTTT///TTTGACCTCACATGCTGGAGAAGCAGCCCCATGAAGGTGCCCAGCCATGCAATGTTCCTG///TGGTTTTCTGATTGATCTTGGGGTCCATCTGTGATATCTCTTTGTGCCAAAAAAGAAAAA
A_73_P331626,A_73_101646|511433	0.0195854	0.0013693	up	3.13606	3.13606	1.64895	DLC1	Bos taurus DLC1 Rho GTPase activating protein (DLC1), mRNA [NM_001102493]	TGGAGAACGAGGACATCTTCCCTGAGCTGGACGACATCCTCTACCATGTGAAGGGGATGC///AAAGCTGCTTCTTGTTTGTGTAAGGTCTGTATTATGGACCTTGACTGGAATATATGACTG
A_73_P107636,A_73_115644,A_73_P108076|281572	0.0170598	0.000754288	up	3.13386	3.13386	1.64794	VEGFA	Bos taurus vascular endothelial growth factor A (VEGFA), transcript variant 3, mRNA [NM_001316992]///Bos taurus vascular endothelial growth factor A (VEGFA), transcript variant 1, mRNA [NM_174216]///Bos taurus vascular endothelial growth factor A (VEGFA), transcript variant 4, mRNA [NM_001316956]	TTTGTACAAGATCCGCAGACGTGTAAATGTTCCTGCAAAAACACAGACTCGCGTTGCAAG///CTAAATCACCGAGCCCGGAAGATTAGAGAGTTTTATTTCTGGGATTCCTGTAGACACACC///GTTTTATTTCTGGGATTCCTGTAGACACACCCACCCACATACATACATACATTTATATAT
A_73_121228,A_73_P382786,A_73_P252581|404169	0.0202435	0.00165294	up	3.12772	3.12772	1.64511	PKIG	Bos taurus cAMP-dependent protein kinase inhibitor gamma (PKIG), mRNA [NM_205812]	GCCCTTTCTACCAAGATAAGTGATACCTAGGACCCAGGAAATAAATGCTGACGATTTGTG///CGGGCACACTTTCACGACGCTGTAACCACAAGGATGTAATTTATTCAGGGGGCGCTGGGA///AGCCTTTCCAGCCTTTTGAGTCAGGACACCTTCTTACCCCGTTTTTTAAAAAGCACTTTT
A_73_P080906,A_73_111863|534043	0.021831	0.0021268	up	3.12701	3.12701	1.64478	CD109	CD109 molecule [Source:HGNC Symbol;Acc:HGNC:21685] [ENSBTAT00000061271]	AGAGTGTCAAATACACAAGATGCTTCAGTGTCCATAGTGGACTACTATGAACCAAGGCGG///TGTATTAATAACAACGGGTCCTTTTATGTGTAGCTGCATAGATGGCTTTTCCCCCCTGAC
A_73_P278221,A_73_114794|539090	0.0198755	0.00149977	up	3.11941	3.11941	1.64127	SPRY2	Bos taurus sprouty RTK signaling antagonist 2 (SPRY2), mRNA [NM_001076147]	AGTTGTGCCGTACTATACGGCACATTCACAAAATATTATACTAATATGTTGTACATTCGG///AGGCATCTTACAGATTTTGCCCCTTTTATGAGGATGTGATAGTTGCTGCCAATGAGGGGT
A_73_113610	0.014751	3.26535e-05	up	3.11602	3.11602	1.6397		LB01361.CR_G22 GC_BGC-13 Bos taurus cDNA clone IMAGE:8440944 5', mRNA sequence [EH156889]	GCTAACAGCAAAGAAATAAGCTATTCTTGAATGATACAGGGATTTGGAAGAGCATAATTC
A_73_112864|514618	0.0183975	0.00105986	up	3.11219	3.11219	1.63793	RACGAP1	Rac GTPase activating protein 1 [Source:HGNC Symbol;Acc:HGNC:9804] [ENSBTAT00000016988]	TAGGACGACAAGGCAACTTTTTTGCTTCTCCAATGCTCAAGTGAAGTCGTGTCTCCTGTT
A_73_P363206,A_73_119723,A_73_P439236|532684	0.016629	0.000677607	up	3.11217	3.11217	1.63792	LOXL2	Bos taurus lysyl oxidase like 2 (LOXL2), mRNA [NM_001099053]	ACTTCAGTGGACTCATAAATAACCAGGTCTCCAAGCGGTAAAGTGGCAACATGGTCATCT///ACGCTCACCGATCGCCATGTGTCATCACGGACACTTACACATACTTGAAACTACGAATAA///GGTTCATGAGCCACCCCAGCCCACGGCTTCCTAAACTTGGGAGTTCGCTTTCTTCAACCA
A_73_107734	0.010729	1.43248e-06	up	3.10146	3.10146	1.63295		Rep: PREDICTED: E2F family member 8 isoform 3 - Pan troglodytes, partial (36%) [TC438982]	ATGGCCTCAGACTGATTTGGAGAACACATTCTCTGAAAATACTGTAAATACGTTGGGGGT
A_73_103226	0.0155841	0.000271182	up	3.10131	3.10131	1.63288		Rep: Histone H3 methyltransferase DOT1 variant c - Mus musculus (Mouse), partial (3%) [TC456101]	CTCGCTGGGGCCCAGCTCCAGCCTGTACTGTCCATAGTTTTAGATAAAGTATTTATCATT
A_73_107593,A_73_P253761|353300	0.0206643	0.00178741	up	3.10099	3.10099	1.63273	RHEBL1	Bos taurus Ras homolog enriched in brain like 1 (RHEBL1), mRNA [NM_181668]	CTGTCCTCTAGCTCTGTTTTTGCTAAATATATGAACTGTGATAACCTATGGGGTTGGTAT///ATTTATGGAGTCATCTGCTCGAAATAATCAGCTGACTCAAGGCATCTTCACCAAAGTCAT
A_73_P126336	0.027659	0.00413696	up	3.10082	3.10082	1.63265		LB01637.CR.1_A15 GC_BGC-16 Bos taurus cDNA clone IMAGE:8325113 5', mRNA sequence [EH169447]	GGTGGAAGGCGTTTATTTTATTAGCTAACCAAATATCATTGAGAGGAATTTGAACTACTG
A_73_107799|534781	0.0193603	0.00130532	up	3.10002	3.10002	1.63228	PBK	Bos taurus PDZ binding kinase (PBK), mRNA [NM_001102178]	GACATGTCAGTTACCTGAAGGTGTATTATCCTATTTTGTACTCCATTGTATTGAGTCTTG
A_73_119874	0.0210904	0.0019211	up	3.0964	3.0964	1.63059		Rep: TonB-dependent receptor precursor - Pseudomonas fluorescens (strain PfO-1), partial (3%) [TC432201]	ATGATTGCAATCGCTCCCGGACCATGTCTCGGTTTGGGGTGTGTTGTATGTGTTATATTA
A_73_114012	0.0241534	0.00291256	up	3.08548	3.08548	1.62549			AGGAATCTGTGCTTAATACCTCACACTCCCAAGTAGCTTGCTAGAGCAGTGGTCATTTCA
A_73_P050566,A_73_120800|280827	0.021159	0.00193219	up	3.06783	3.06783	1.61722	IL7	Bos taurus interleukin 7 (IL7), mRNA [NM_173924]///Rep: Interleukin-7 precursor - Bos taurus (Bovine), complete [TC400018]	GAATTTGGAAGAGAATAAATCTTCAAGGGAACAGAAAAAACAGAATGACCTGTGTTTCCT///GTAGTACCGGAAGATGGACTTAAACAATGGAAACCAAATCCTGCAATCAACAAAACTATT
A_73_101344|613989	0.0200628	0.00156719	up	3.06756	3.06756	1.61709	SSPN	Bos taurus sarcospan (SSPN), mRNA [NM_001193005]	ATCACTGGCACTTTAAAACTGTTCCTACTCATCCAGATGATTCTGAACTTGGTCTGTGGC
A_73_P041716|508495	0.0197036	0.00143196	up	3.06478	3.06478	1.61578	ULBP3	Bos taurus UL16 binding protein 3 (ULBP3), mRNA [NM_001103233]	GACATGGAAGTCTGTTAAGTGTGCAATACCTTTATGTCTAAATAAACAATGTACAGACCT
A_73_102944	0.0216604	0.00208181	up	3.06323	3.06323	1.61505		LB02829.CR_N23 GC_BGC-28 Bos taurus cDNA clone IMAGE:8230873, mRNA sequence [DV914254]	AGCTAGGACGTTTTTGTAGAACTGATAATGTACCTGAATCCTTTTTGAGAGAGTTGAGGT
A_73_101979	0.0178544	0.000942575	up	3.06022	3.06022	1.61363		Rep: Reverse transcriptase-like - Bos taurus (Bovine), partial (16%) [TC443361]	GCATATATAAAGGAAGCTTTTTTCCCTCCCCTGAAATAGTTCCTGGCATGTGGTAGGCAC
A_73_105698,A_73_P131006|523360	0.048403	0.0126707	up	3.05258	3.05258	1.61003	CARD14	Bos taurus caspase recruitment domain family member 14 (CARD14), mRNA [NM_001205901]	TGAGCTGGATAAAGTGCCCTGTCTATATAGCAGCCTGGCCCCCGAAAGCTGGAGTGACCT///AGTGTCTGTGTCCTGCACAGGATGGAGATTTTCCCCATCATTATCCATGTCTCCATCAAT
A_73_P154492,A_73_P037371|507646	0.0161901	0.000406849	up	3.04476	3.04476	1.60633	TM4SF4	Hw_Liver_12_H09 Bos taurus CF-24-HW liver cDNA library Bos taurus cDNA, mRNA sequence [DV785258]///Bos taurus transmembrane 4 L six family member 4 (TM4SF4), mRNA [NM_001034306]	GGGCAGAGTTATTTCTTCTCCTTTCCACCAGCTCAGTTCAACTTAGAATTTTATGTTAGT///GCACTGCTTCTTTGTACATAGAGATGTTAATATCTTTGGAAGTTTTACAGAACTCAAAGG
A_73_P464881,A_73_121406,A_73_P034521|408010	0.0161901	0.000454847	up	3.04389	3.04389	1.60592	GARS	Bos taurus glycyl-tRNA synthetase (GARS), mRNA [NM_001097566]	ACTGATGAGATTGGTGTGGCTTTCGGCATAACCATTGACTTCGATACAGTGAACAAGACC///TTGATGTCTGATAAGAAGTGTTCTGCTGAGAAGAAATCAGAGATGGAAAGTGTCTTGGCC///GAGGCAATCGAAGAATGAGAACAGTTTTGGCAACTTATGACCATTTGCTCTAATAAAAGA
A_73_115493	0.039947	0.00894483	up	3.03608	3.03608	1.60221		Rep: MGC143103 protein - Bos taurus (Bovine), complete [TC415580]	CTGACTGTCCTGTGACCAAGCCAATGCCGGCAGCCACCCTCCTCCAGGATTCTTGTAAAT
A_73_P116816,A_73_119688,A_73_P383931|615342	0.0250262	0.00321371	up	3.03283	3.03283	1.60067	BNIP3	Hw_Fat_52_B05 Bos taurus CF-24-HW fat cDNA library Bos taurus cDNA, mRNA sequence [DV781287]///Bos taurus BCL2 interacting protein 3 (BNIP3), mRNA [NM_001076366]	CCCCTTTCATACACTGTAAAAATTGCTGGTTGTAATTGCTTTCCTTTTTCCCACCCAAAA///CATCTTCTCTGCGGAGTTCCTCAAGGTCTTCCTGCCGTCGCTGCTGCTGTCCCACCTGCT///CAACGAGCATGTTGTTGATTAATACCTACTGTAATAATTCGGTAGTAACCTTCTTCAGAT
A_73_P037211|100125310	0.0156692	0.00030272	up	3.0315	3.0315	1.60003	B3GALNT2	Bos taurus beta-1,3-N-acetylgalactosaminyltransferase 2 (B3GALNT2), mRNA [NM_001103343]	AAGTGCCCTTTGATGATGACTTTTCGTATCATGTCTGTGGTATTTAATATTTCCCCCTTA
A_73_117792|338050	0.0224681	0.00230819	up	3.02213	3.02213	1.59557	SERPINA5	Bos taurus serpin family A member 5 (SERPINA5), mRNA [NM_176646]	TGTCATTTGAAGACCCTAATGACTAACCGTGGATTTTAGTGTCAGCAATAACAATAAAGC
A_73_113797,A_73_P482568,A_73_P341251|516326	0.0313896	0.00540114	up	3.01823	3.01823	1.5937	LMNB2	Bos taurus lamin B2 (LMNB2), mRNA [NM_001276353]	CTTTCTTTACCCAGAGCCACTGAAAACTATTTTTATATCATTGGCTTCTTTAATCCTTCC///TTCCGGAAGATGCTGGACGCCAAAGAACGAGAAATGATGGAAGTGCGGGACATGATGCAG///AGGTGACCACGCGCGAGGTGAGTGGCATCAAGACATTGTACGAGGCAGAGCTGGCTGACG
A_73_P205852,A_73_P056231|618806	0.0184692	0.00108708	up	3.01806	3.01806	1.59362	LOC618806	Bos taurus melanoma-associated antigen 10-like (LOC618806), mRNA [NM_001206356]	AGCACATCTACATCATGGTCCCCATCCTGGGCCTCACCTGCAACGCAATGCTGAACAGTG///TGCTCAGGGTCAAACAAAGGGCTTTGAGGACCTTCCCACTGCAGTCTGCAGAGGCTGCAA
A_73_108119	0.0213181	0.00197997	up	3.01251	3.01251	1.59096		CR451603 Normalized and Subtracted bovine embryonic and extraembryonic tissues (bcaz [CR451603]	TGTGTGACATCACATGTTAAGAATTCCTGCTCTAGAGTAGTAGCCTTCAAAATTTGAAAG
A_73_115547|535597	0.014751	6.16562e-05	up	3.00704	3.00704	1.58835	RORA	Bos taurus RAR related orphan receptor A (RORA), mRNA [NM_001192861]	CTGCACATCCTTTGGTGATCGGGGTCAGGCAAAGGAGGGGAAACAATGAAAACAAATAAA
A_73_P108931,A_73_P247396,A_73_P292651,A_73_119632,A_73_P250911|281040	0.0161901	0.000521274	up	3.0013	3.0013	1.58559	CAV1	Bos taurus caveolin 1 (CAV1), mRNA [NM_174004]	GAGGCTATTGGCAAAATATTCAGCAATATCCGCATCAACACGCAGAAAGAAATATAAATG///CCATATGGGGTATGGTCCACATCAGCCTCATTAAATGAATTAAGGTGAATAAATGGGGCC///TGACCCGCTGTTTGAGGCTATTGGCATAATATTCAGCAATATCCGCATCAACACGCAGAA///TTATTCCCTTGTGCAAATCAAGTGCTGGTCCAAAAGACTGCTGAAATTTTTATATGCTTA///TGGAGGCCATTGTGTGAGACTGTCAGAGTTGTTGCAAATGTGACCCCTTCAAATTAAAGC
A_73_P032706|617129	0.0230447	0.00247615	up	2.99799	2.99799	1.584	MCUR1	Bos taurus mitochondrial calcium uniporter regulator 1 (MCUR1), mRNA [NM_001102309]	TTAGCAGGATCTGTATTTACGTGCCTAACAGTAGCTCTGGGATTTTATCGCCTGTGGATA
A_73_121317	0.0409863	0.00938332	up	2.99686	2.99686	1.58345		PREDICTED: Bos taurus neuropilin 2 (NRP2), transcript variant X1, mRNA [XM_005202752]	CTGTTAAAGGTATTTGACCATCCACTGGCTGAGCCAGATCAAGGGAACTTGAGAGCTTTT
A_73_P056051,A_73_P036426|282362	0.0261929	0.0036302	up	2.98628	2.98628	1.57835	SLC5A3	Bos taurus solute carrier family 5 member 3 (SLC5A3), mRNA [NM_174607]	CAATGTTTATCATAGTGGTCCCCGGAATGATTTCCCGGATACTGTTTGCCGATGACATAG///GAACCTCCACAAGTTAAAGTAATACTCAATATTGGACTTTTTGGTGTGTGTTCACTTGGA
A_73_103853,A_73_P093996,A_73_P030961|407241	0.021831	0.00211854	up	2.98556	2.98556	1.578	KLF15	Rep: LOC407241 protein - Bos taurus (Bovine), complete [TC395213]///Bos taurus Kruppel like factor 15 (KLF15), mRNA [NM_001082425]	TGTATATTTTCTTTGGTTCTTCATAAAAATATATTTGCCAATAAAAAGAAGAAAGAACTT///ATGCACAGGTGCACTTTCCCTGGCTGCAGCAAGATGTACACCAAGAGCAGCCACCTGAAG///GCCCTGATCTAGAAGTGCATTCCTTGTTTTGTCTAGAAATTAATATCAAATGAACTAGCT
A_73_114267,A_73_P067036|100140488	0.0155841	0.000283743	up	2.98237	2.98237	1.57646	CCL17	C-C motif chemokine ligand 17 [Source:HGNC Symbol;Acc:HGNC:10615] [ENSBTAT00000001579]	GTGAAGAAGGCAATGAAATACTTGCAGAAACAGAAGAAGTCACCTGCTTCGGCCCTCCAG///TGCAAACCCCAAGGACAAAACGGTGAAGAAGGCAATGAAATACTTGCAGAAACAGAAGAA
A_73_P034876,A_73_P407237|616317	0.0188405	0.0011617	up	2.97913	2.97913	1.57489	STMN1	Bos taurus stathmin 1 (STMN1), mRNA [NM_001034790]	TGTCCCGATCTTACAGACGCTACTGTACTTGAATGGTTAATAAAACTGCACAGTGCTGTT///CCCAATTCTGTCCCGATCTTACAGACGCTACTGTACTTGAATGGTTAATAAAACTGCACA
A_73_P062891,A_73_P377241|541284	0.0155841	0.000208337	up	2.97703	2.97703	1.57387	MBOAT1	Bos taurus membrane bound O-acyltransferase domain containing 1 (MBOAT1), mRNA [NM_001192857]	ATCAAACCACAAGCTCATAATCAAAGGTGGCCTCAGACTCTGAACTCTCTTAATAAAAAA///GATTATATAGCCTTCATTGAGGGGAGACACACACACATGAAGTTGCTGGAAGTGAACTGG
A_73_P170127	0.015973	0.000336017	up	2.97408	2.97408	1.57244		AV601293 Bos taurus kidney fetus Bos taurus cDNA clone E1KI003E01 3', mRNA sequence [AV601293]	CTTCATTTGGTCAAGACCAATTCTTCCCTCCAAATAAATGAAGAGGGAGGCCTATGGCCT
A_73_104267	0.0410587	0.00941403	up	2.97134	2.97134	1.57112		Rep: Protein FAM131C. - Canis familiaris, partial (7%) [TC423436]	ACCTCTAATTAAGACATTTTGTTCTTGCCCTGGATTGTAATAAAACTGAGTCAGTTTCTG
A_73_107840	0.0209769	0.00189511	up	2.96954	2.96954	1.57024		Rep: PAOX protein - Bos taurus (Bovine), partial (9%) [TC422434]	GTGTGTGTATTCTGCTCCTTCCAGCTTTATGTTTGTGTGGTCAATATCTGTTTACATTCA
A_73_115135	0.0154489	0.000128739	up	2.96618	2.96618	1.56861			TCAAATGTCAGCTTCCAGCCTTCTGAGTTATTTGAGCAGAGAGTTACGGAGAAAAGGGAG
A_73_P034751|505284	0.0304554	0.00504771	up	2.96408	2.96408	1.56758	CENPH	Bos taurus centromere protein H (CENPH), mRNA [NM_001034236]	ACAGCATTCCTGGAAATCTCAGCTCCCATTTGTAATACTTCTGTGTATTTGTTTATCAAC
A_73_118598	0.0479134	0.0124262	up	2.96171	2.96171	1.56643		PREDICTED: Bos taurus lysosomal trafficking regulator (LYST), transcript variant X7, mRNA [XM_015460924]	ATGCTGTAGCAAATATTTCTGTAAATTATCACAAGCTCTGTTACCTTTGTATACACTGCC
A_73_109021	0.0420528	0.00978438	up	2.95829	2.95829	1.56476		AM032400 KN-252-spleen, Bos taurus Bos taurus cDNA clone C0006008e01 5', mRNA sequence [AM032400]	TGTAATGGCCACTGACCTTCTCATGGGATGCAGGTGAAATCACTTGTCAACGCAAAATGT
A_73_121449	0.0186542	0.0011248	up	2.95368	2.95368	1.56251		Rep: Predicted protein - Aspergillus oryzae, partial (6%) [TC408820]	TGTGGCCAGAAATTGGCCCGAGTAGATGGTTCATGAAGGCCTTTGTACATTTGCATGTTT
A_73_P380256,A_73_117647,A_73_P141421|510209	0.0155841	0.000266355	up	2.95104	2.95104	1.56122	SLC4A7	Bos taurus solute carrier family 4 member 7 (SLC4A7), mRNA [NM_001098926]	CAAACTCATGGATCTGTGTTTCACAAAGAGAGAGCTTAGTTGGCTTGATGATCTCATGCC///TATATGAAGTACAAGTATCTACCAGTCTAGAATGTGAATAATCTTGCTTTTCAAATCTGT///CCGCTCAGGACACTCTTTCTTCCACCGGTTTTATTTATTATAGACATCTGTTTACAGAAA
A_73_P172412	0.0224726	0.00231055	up	2.94962	2.94962	1.56053		Rep: Suppressor of hairy wing homolog 3. - Canis familiaris, partial (80%) [TC444537]	ATTTCTGCATTCCTGCTCTATGGAGCTCGTGCAACCTGGTGCAAGAAAAGTTGGAATTTC
A_73_120172|616753	0.042494	0.0099857	up	2.94644	2.94644	1.55897	CISH	Bos taurus cytokine inducible SH2 containing protein (CISH), mRNA [NM_001046586]	AGTTTAGTAGTCTTTTTATTTTCACTGCTTTTTCTGTAATGACAATAAAATTGTACCTTT
A_73_P083226|521431	0.015973	0.000370045	up	2.94357	2.94357	1.55757	SCAI	Bos taurus suppressor of cancer cell invasion (SCAI), mRNA [NM_001192538]	TTAGCATCCATTCTGGATGTGCGAAACGTGTTCCTTGAGAATACCATAGACGACTATTAA
A_73_P418956,A_73_P262266,A_73_120153|515845	0.0134767	1.2811e-05	up	2.93999	2.93999	1.55581	FANCD2	Bos taurus Fanconi anemia, complementation group D2 (FANCD2), mRNA [NM_001192429]	ACTTTGTGAAAGATGGGAGTACACGGACTTCGCAGGAATCACACCAAAAATTGGGTTCTC///CTTCAGTATCCTCATCAACCTTGATAAAGGTGTTTGATAGTCGTCCTGGTCTGTTTGCGT///AGTCATGATTCTAGGCTTTGGGAGCTGGTTTTGAAACTCTGGATTTATTCTACAATTTAA
A_73_P115013|788079	0.0257051	0.00347285	up	2.93265	2.93265	1.5522	LOC788079	GB	TTTATGCCCTTTCATTGGTATTGTATGTTCCTATGGCCGTGTTCTCCGTGTGGTCCATCA
A_73_113753,A_73_P165212|540105	0.0161901	0.000527583	up	2.93133	2.93133	1.55156	FMNL3	Bos taurus formin like 3 (FMNL3), mRNA [NM_001191506]	ATGGAGCTGATCCGGCGGGAATGCAGCATACATGACAACAGCGTCCTGCGCAACTTCCTT///GGCAGAGGGAGGAGAGGAGAAAGCAAGTATCCCTTCTTTTTTCCCCTTACTTTTTGAATC
A_73_P086606	0.0381042	0.00809004	up	2.92397	2.92397	1.54793		ectonucleoside triphosphate diphosphohydrolase 4 [Source:HGNC Symbol;Acc:HGNC:14573] [ENSBTAT00000061167]	AAATTTAAAGACAGCCTTGCAGGTTTATGACAAGGAGGTGCAGTGGACTCTCGGAGCAAT
A_73_P105156|538590	0.0152818	9.85526e-05	up	2.9186	2.9186	1.54528	COL5A2	Rep: Procollagen alpha 2(V) precursor - Sus scrofa (Pig), partial (14%) [TC404374]	GTCTTAAGTGCCTGGCCTCCTTATCCTTCAGAATATTTATTTTACTTACAATCCTCAAGT
A_73_P409606,A_73_P041301|514209	0.0155841	0.000176667	up	2.91368	2.91368	1.54284	ASNS	Bos taurus asparagine synthetase (glutamine-hydrolyzing) (ASNS), mRNA [NM_001075653]	TTTGACAATGCCGTTAAGAAACGTTTGATGACCGACAGAAAGATTGGCTGCCTTTTATCA///TAGGATTTTACAGGACTATATTGAACATCAGGTTGATGATGCAGCGATGGCAAGCGCAGC
A_73_106668|281614	0.0202294	0.00164971	up	2.91273	2.91273	1.54237	ALCAM	Bos taurus activated leukocyte cell adhesion molecule (ALCAM), mRNA [NM_174238]	TCGCTGCCCTAGTTGCTGGTGTCGTCTATTGGCTATACATGAAGAAATCAAAGACTGCAT
A_73_P039846|281057	0.0155841	0.000186165	up	2.91222	2.91222	1.54212	CD44	Bos taurus CD44 molecule (Indian blood group) (CD44), mRNA [NM_174013]	TTGCTGTCAACAGTAGGAGAAGGTGTGGGCAGAAGAAAAAACTGGTGATCAACAATGGGA
A_73_P206397	0.0161901	0.000470961	up	2.91041	2.91041	1.54122		PREDICTED: Bos taurus testis specific protein, Y-linked 3-like (LOC786811), partial mRNA [XM_001254382]	AGAATGAAGTGATTGTCAAGGAGTACCTGATGAAGGTCACTGGATACCACGCATCTCGTT
A_73_P113531	0.0167188	0.000708884	up	2.90739	2.90739	1.53973			TTCAGTAAAATGGCGGAAGAGAAGCTGACCCACAAGATGGAAGCCAATAAAGAGAACAGA
A_73_101904,A_73_P151281|539780	0.027432	0.00406226	up	2.90725	2.90725	1.53965	NAIP	NLR family apoptosis inhibitory protein [Source:HGNC Symbol;Acc:HGNC:7634] [ENSBTAT00000004317]	CCTCAGTCTAAACATTTCATCCTTTCCTGGAAATGGATACTGCCATTCTCTCCAATCATT///CATGTTAAGTTGGCTCCTGGATGCAGAAGACATCACACTGCTTACTGCCACAATAAAAAA
A_73_P043896|574085	0.0491369	0.0129807	up	2.90612	2.90612	1.53909	DAPL1	Bos taurus death associated protein like 1 (DAPL1), mRNA [NM_001025346]	ACATTATTCAGCAGCCTCGAAACTGTTAAGCTGGGACATAAAACAGCCGTCTAGCCAACT
A_73_P302166,A_73_P195587,A_73_P030881|525136	0.0184689	0.00108288	up	2.90551	2.90551	1.53879	POC1B	Bos taurus POC1 centriolar protein B (POC1B), mRNA [NM_001099031]	GTACCCTTAAGGTGAAATAATTCACCTACCTCTAAAATAGCATTTTATGTGCAGAGAATG///TGTAACCGATTTGCAGACCTCTACTCCCCCTGTTGTGGACATCCTTTCTTTTGATTCTAC///GGTACCTGAATGTAAGGACTTTAAAAGAACATTTATTGGCATCATTGTCTACCTGTTTCT
A_73_P107816,A_73_P109691|506812	0.0241911	0.0029261	up	2.90449	2.90449	1.53828	CPT1A	Bos taurus carnitine palmitoyltransferase 1A (CPT1A), mRNA [NM_001304989]	TTTGAAGCTAAAATCCTGGTGGGCTACCAATTATGTGAGCGACTGGTGGGAGGAATACAT///TCGTACATTCTCGTCGGTGAGGACCTCATCAATTTCCATATATCCTCCAAGTTCTCCTGT
A_73_104330,A_73_P250311|104976701	0.0155841	0.000283414	up	2.90443	2.90443	1.53826	MIC2	Bos taurus CD99 molecule (MIC2), mRNA [NM_001281907]	CAGCGGGTCAAGTGCATTGTGGAACACAGCGGGAATCACAGTGCACACCTCATACCCTTG///ATGGAAATGGAGTTAAGCAAGCATTACCAGGCCTATGTGCAGGGAGAACTTTGTTGGAGA
A_73_P509143,A_73_P363601,A_73_115499|513053	0.0367541	0.00748489	up	2.90398	2.90398	1.53803	OLFML2B	Bos taurus olfactomedin like 2B (OLFML2B), mRNA [NM_001100354]	AAGTCTTTGCTGCTAGTTCTCTGCTTCGCTCTGGTTACGACTCTGGGCTGGGGGTACAGC///ATCATCAAGTATGACCTGAAGCAGCGCTACGTGGCTGCCTGGGCCATGCTCCATGACGTA///AAGGTTTCGTCATCAGGGTCTTGTAGGCAGATGGCACCAGGAGCAGGAGTGAAGGAGGCA
A_73_P326316,A_73_P085561,A_73_103173|534282	0.016629	0.000688187	up	2.90273	2.90273	1.53741	RNF145	Bos taurus ring finger protein 145 (RNF145), mRNA [NM_001102168]	AATGCCACTTTTAAAGCTGTTAATAGACTTTGCACCTTTTCTTTGACAAGGATGTGTCAT///ATCTGTTATCAGGACATGAAATCTGCCGTGATCACACCTTGCAGTCACTTCTTCCATGCA///TGTGGGATGTGACTTTATTTTATTTTTAGTAGCAGATTTGGATGTAGACTGACATAGCTG
A_73_106977	0.0155841	0.00024903	up	2.90217	2.90217	1.53713			TTGTATGCATCTCTGTGACACATAAAGTGCTCTATTTCACCCTGTACAGCTACTCAAGGT
A_73_114350	0.0161901	0.00039099	up	2.90157	2.90157	1.53683		Rep: AT-hook-containing transcription factor. - Bos Taurus, partial (6%) [TC446870]	AACCCTGTAGCAGCTCAGACCTCAGCTTTTCTGGAATGTGTGTGCATCACTGATATTTGT
A_73_P064466|529318	0.0314676	0.00543747	up	2.89665	2.89665	1.53439	MEX3C	mex-3 RNA binding family member C [Source:HGNC Symbol;Acc:HGNC:28040] [ENSBTAT00000019818]	GAAAAGAGAACGCCATCATGTCCAGTTTGCCAGACAGCTGTTACTCAGGCAATCCAAATT
A_73_P166862	0.031718	0.00554615	up	2.89457	2.89457	1.53335		CR550412 Normalized and Subtracted bovine embryonic and extraembryonic tissues (bcaz [CR550412]	TGCATCGGGATCTTTAACTTGGGAAATAACTCTCCCGAGTTTCGGTTGTTCACAAGGAGT
A_73_109700	0.0236653	0.00275879	up	2.89111	2.89111	1.53162		HW_LOIN_45_E05 Bos taurus CF-24-HW loin cDNA library Bos taurus cDNA, mRNA sequence [DV793638]	TGCGAGCTTGTGGGAACACCTTGTACCTGAGCTTATAGGTACCAATAAAGAGGCTCTATT
A_73_P146266	0.0201342	0.00160696	up	2.89103	2.89103	1.53158		Rep: Uncharacterized protein ENSP00000339522 - Homo sapiens (Human), partial (5%) [TC419868]	GTTTTTACATGGGTTTGTTTTCAATAAAGTGTGACACTGCTGTCCAAAAGCCGACAAAAA
A_73_107600	0.0154489	0.000142795	up	2.89088	2.89088	1.53151		Rep: neuralized-like - Gallus gallus, partial (13%) [TC421248]	TGTTAGTGTGAGGGTAGTTGCTGCCTCCTTTGTGAACTTGGATCACCGTGATTGTGAATA
A_73_118346	0.032105	0.00571566	up	2.88611	2.88611	1.52913		Rep: Pulmonary surfactant-associated protein B - Ovis aries (Sheep), partial (34%) [TC436917]	AGCACTACCATAGTGTTCTATATTTAGATATGAACTAGATGAATAAATGGTGGAGACTGC
A_73_P130776,A_73_P036196|514937	0.014751	2.6053e-05	up	2.88587	2.88587	1.52901	TIMM10B	LB01627.CR_B04 GC_BGC-16 Bos taurus cDNA clone IMAGE:8087814, mRNA sequence [DT815376]///Bos taurus translocase of inner mitochondrial membrane 10B (TIMM10B), mRNA [NM_001040530]	TTGCCCTGATGAAAGAAAATGGGAACCTCTATCTAGCTGTCGTTAAATCTGTCTGACTGA///GTCCGAGAGCTGGGTACTGTTGCTCCTCTTCCTGGAGCTAATAAACCCACTTTTCCTCTG
A_73_109512|540135	0.020655	0.00177972	up	2.87973	2.87973	1.52593	PHLDA1	Bos taurus pleckstrin homology like domain family A member 1 (PHLDA1), mRNA [NM_001105631]	GCCATTCTGGCGGTCAAGTCCACGCGGCAGAAGCAACAGCACTTGGTCCAGCAACAGCCT
A_73_106238,A_73_P058371|784639	0.0162642	0.000558671	up	2.87635	2.87635	1.52424	TMEM159	Bos taurus transmembrane protein 159 (TMEM159), mRNA [NM_001080361]///transmembrane protein 159 [Source:HGNC Symbol;Acc:HGNC:30136] [ENSBTAT00000024703]	AGGAAGTTGTCTTGTTAAGCCATTTCTTCAAAAAGTCCTATGCAAATGCTAAACAACTAC///AATCATGGTGTCCTACATGGTAATCTCCAGCCTCATCAACTACTGGTTTTCTCTCAGGCT
A_73_102392|100848433	0.0198688	0.00148756	up	2.87518	2.87518	1.52365	LOC100848433	PREDICTED: Bos taurus uncharacterized LOC100848433 (LOC100848433), miscRNA [XR_139278]	TCTTTGAATTGTTAGTTATTGATGGCCTCACTTATAAACACTAAATTCTGTCACCTCCTG
A_73_P053181	0.021509	0.00203368	up	2.87135	2.87135	1.52173		PREDICTED: Bos taurus melanoma antigen family B, 4-like (LOC782703), mRNA [XM_003585379]	TTCCCAGACCTTTATGACGAGGCTCTGAGAGATCAGGTGGAGAGAGCAGGGCAGAGAGGT
A_73_P046726,A_73_115786|281990	0.0167699	0.000719339	up	2.86827	2.86827	1.52018	POLD1	Bos taurus DNA polymerase delta 1, catalytic subunit (POLD1), mRNA [NM_174427]	TGTGTAATCGCATTGACATCTCGCAGCTGGTCATTACCAAGGAGCTGACTCGCGCTGCCG///CAGCCTGCACGAGGACGTCATCTGCACCAGCCGGGACTGTCCCATCTTCTACATGCGCAA
A_73_120752|613734	0.0472818	0.0121272	up	2.86496	2.86496	1.51851	SLC35D1	Bos taurus solute carrier family 35 member D1 (SLC35D1), mRNA [NM_001082459]	CAGATACTGAGGTGTCTTGATCATGAAGAAAATACCATTGCACTTGTACAATCTGAGGAT
A_73_P060231|617445	0.0241657	0.0029175	up	2.86205	2.86205	1.51705	KAZALD1	Kazal type serine peptidase inhibitor domain 1 [Source:HGNC Symbol;Acc:HGNC:25460] [ENSBTAT00000015268]	TATGATGTTTGGAATGTGACAGGGCAGGATGTGATCTTTGGCTGTGAAGTGTTTGCCTAC
A_73_109149	0.016629	0.000664525	up	2.85926	2.85926	1.51564			TATCAAATTAATCAGTGCAGCCAACCTTATTTATGAACCACATCTTTGAAACTGTGCAGT
A_73_P184682,A_73_107250|617091	0.016629	0.000636386	up	2.85719	2.85719	1.5146	ENC1	Bos taurus ectodermal-neural cortex 1 (ENC1), mRNA [NM_001078067]	ACTGCTTCCATTGCTGTTTCTCGTAATATCGTATCTTAGAAAATAGGGTTTAAGACCAAT///TGAGTATGTGGTTCACATACAAAACTGTGTAAGTTGAAGAAGTAAAGTGTTCGTGTTCAT
A_73_P435751,A_73_106928,A_73_P440781|517588	0.0203306	0.00168791	up	2.85588	2.85588	1.51394	GLI1	Bos taurus GLI family zinc finger 1 (GLI1), mRNA [NM_001099000]	TCTTCCTGCACCTCCCTGGAGAAGCCGAGCTGAGTATCCAGGATACAACCCCAATGTAGG///ACACAGTCTAAATATATTTGGGGAGGAATTTTATAATGACACTGTTTCCTGATAATAAAG///TCATTCTACAGGACACCTCAAGGCGCAGCTTGTGTGTAATTATGTTCAGTCTCAACAGGA
A_73_P149636,A_73_P069621|786672	0.0266755	0.003799	up	2.85138	2.85138	1.51166	TNFAIP2	Bos taurus tumor necrosis factor, alpha-induced protein 2 (TNFAIP2), mRNA [NM_001191189]	TTTGATACCCTGCTCCAGAGCCTGTTTGGGGACCTGAAGCCGCTGTTCAAGAGGTTCACG///TATAAAGGTTGGTTAGCTTTTCCTGTGTACTGATCTCCTTAGGAGCGCCTCTCAAGCATG
A_73_106120|504742	0.0177178	0.000920203	up	2.84984	2.84984	1.51088	CITED4	Bos taurus Cbp/p300 interacting transactivator with Glu/Asp rich carboxy-terminal domain 4 (CITED4), mRNA [NM_001080726]	TCACCCCTGTGGAGTGGAGCAATGCCCCATCTGGCCCCCAACACCAAAATAAAACTGGGT
A_73_P120611,A_73_106737|505716	0.0259075	0.00351913	up	2.84913	2.84913	1.51052	RELT	RELT, TNF receptor [Source:HGNC Symbol;Acc:HGNC:13764] [ENSBTAT00000021927]	TGAGGAGAACCGCTATGTGGTCCGGCTAAGTGAGAGCAACCTGGTCATCTGAGGAGCTGT///TTATTTATTGAAACTTGGCTGTTGTCACATCCTTGTGTCTCACATACTCATCCATTGTTG
A_73_103870	0.0233	0.00260693	up	2.84794	2.84794	1.50992		PREDICTED: Bos taurus chromosome 23 open reading frame, human C6orf132 (C23H6orf132), mRNA [XM_015459822]	GGATGTGGACTCCCAGCTGTATCTTGCTCTGGGGTTGGCAGGGAAGGACTGATTCTCTCT
A_73_P093056	0.0435754	0.0105084	up	2.84592	2.84592	1.5089		Rep: collagen, type XXIV, alpha 1 - Canis familiaris, partial (97%) [TC424276]	AGTACTACATTGAAAGCAGTTCCGTATGCTTTCTCTAAGGTCTCTGAATTAGTTCAGAAT
A_73_105482	0.0161901	0.000432775	up	2.84458	2.84458	1.50822		Rep: High affinity branched-chain amino acid ABC transporter, permease protein - Campylobacter jejuni subsp. jejuni serotype O:23/36 (strain 81-176), partial (5%) [TC402437]	ACTCTACTACCCTACTTGGAAACGGATAGATATTTCAGGGGTTTGTAATGGGAATTTGTA
A_73_P108906,A_73_111882|281584	0.03243	0.00584016	up	2.84381	2.84381	1.50783	ABCA4	Bos taurus ATP binding cassette subfamily A member 4 (ABCA4), mRNA [NM_174221]	TCTCCTGGGTGTGAACGGAGCTGGCAAAACCACCACATTCAAGATGCTCACTGGGGACAC///GTGGCCTCCATACTGCTCTCATTTCAAGTGGATCTGCTTTTTGTGTGTGTGTACGTATGT
A_73_111885	0.0223477	0.00226419	up	2.83951	2.83951	1.50564		Rep: NUDIX hydrolase - Mesorhizobium sp. (strain BNC1), partial (12%) [TC447681]	TATTTATTTTTGGCAGTCTTGAAAGCTGGGTGATGTAATGAGCAGATATTTGGTTATCTG
A_73_P184497	0.0289915	0.00456791	up	2.83768	2.83768	1.50471		LB01727.CR_C06 GC_BGC-17 Bos taurus cDNA clone IMAGE:8097824, mRNA sequence [DV818806]	ATGTGTTTTCAGTCTGATACCAGTTTTCCATAAATTACTGTGGGTGTGTAACCATGAATG
A_73_109972	0.0223893	0.00228913	up	2.8322	2.8322	1.50192		PREDICTED: Bos taurus TATA-box binding protein associated factor 4b (TAF4B), transcript variant X1, mRNA [XM_010818755]	GCTTAGCTTTATTTTTTGGTAAAGTGCAGCACACTCCCATATTTGTGTATAATCTTCTTG
A_73_P129216	0.0239301	0.00284762	up	2.83201	2.83201	1.50183		Rep: Rogdi protein - Xenopus tropicalis (Western clawed frog) (Silurana tropicalis), partial (5%) [TC429980]	GGTTTCTTAAGGCATCAGCCACCCATTTCCTTGTATGAATCTGTAATAAACCTTTCTCTG
A_73_111161,A_73_P390781,A_73_P466388,A_73_P416361|526547	0.0159263	0.000318139	up	2.82911	2.82911	1.50035	EXOC3L4	Bos taurus exocyst complex component 3-like 4 (EXOC3L4), mRNA [NM_001205930]	GCCCACCTGAATGTGAAAATGAAGAACAGAGTATTTATTTTTAAAATAAACATGAATTAA///AGAGGCATTCCAGGCATTTGGAGGAGGGTTTGGCGCAGAAGTTCCCTTTGGTACTGCCCA///TACAAAGACGACATAGGGCGGCACCTGGAGACGCTCATCAAAAGCTACCCTGACGTCAGG///GGGCTGGCCGCGGAGATCGGCGCTATCGTGCGCGAGACGCTGGGCCCGGATGGCGTGGAC
A_73_P322881,A_73_101356,A_73_P362916|281860	0.0161901	0.00049402	up	2.8259	2.8259	1.49871	IL1RN	Bos taurus interleukin 1 receptor antagonist (IL1RN), mRNA [NM_174357]	ATCTGGAGATGAGATCAAGCTCAAGTTAGAGGCCGTGAACATCACTGACTTGAACCAGAA///TGGAAAGTGTCCTGTTCTCTGTGACTTAAGCTTTGTTTTAAGATAAAAACTTGAAACCTC///GGATACCACTGAGCAATTAACGCTTTCACTTTTCAACCTTTAACAATGAAAAGTTGGCCT
A_73_P382501,A_73_119225,A_73_P251636|518050	0.0173221	0.000826993	up	2.8243	2.8243	1.49789	ANXA3	Bos taurus annexin A3 (ANXA3), mRNA [NM_001035325]	TACAAGAAGAGTCTTGGAGATGAGATTAGTTCTGAAACATCTGGTGATTTCCGGAAAGCT///ATACTACCCACATTGCATTTCTGCTTTGGAAGTGAGAATCGTTGTATCGTTCTAAAGCAC///ATAGCATAAAAGGAGAATTGTCTGGCCATTTTGAAGACTTACTGCTGGCCATAGTTCGTT
A_73_112820	0.0481925	0.012557	up	2.82408	2.82408	1.49778		715751 MARC 6BOV Bos taurus cDNA 5', mRNA sequence [CB457642]	AAATCGTTTTGACTCCAGAGTTTACCTAGTCTGGTTCCACTACCATAGTTATGTGCAGCT
A_73_P032296,A_73_P114046|530709	0.0328731	0.00600663	up	2.82356	2.82356	1.49752	USH1C	Bos taurus USH1 protein network component harmonin (USH1C), mRNA [NM_001035382]	CTAAGATTGATGCCACAACCTTACTCTGAACTCATTAATAAAATAAGCAGCCTTCTTTTC///ATTGTGAAAGGGGATGAGATCATGGCCATCAATGGCAAGATCGTGACAGACTACACCTTA
A_73_P062081|100139154	0.015973	0.000358069	up	2.81814	2.81814	1.49474	XPO5	exportin 5 [Source:HGNC Symbol;Acc:HGNC:17675] [ENSBTAT00000025250]	TAAGAATCTTCCCTCACTTTTCAAAAAACCAAAGCCAATGCCGGAGACAGATGCGCTGGA
A_73_104920,A_73_P096821|533038	0.015973	0.000350883	up	2.81772	2.81772	1.49453	TM4SF1	Bos taurus transmembrane 4 L six family member 1 (TM4SF1), mRNA [NM_001075980]	AGGGGCGGGAGGACCATGAGGAAATACCCCCAAATTTACTTGTTTCGATACAGCAAATAA///TGAAAACTGTGGCAAAAGATGCGCGATGCTGTCTTCTATACTGGCTGCACTCATTGGAAT
A_73_101764	0.0492178	0.0130108	up	2.81397	2.81397	1.49261		1254557 MARC 7BOV Bos taurus cDNA 5', mRNA sequence [DN516121]	TCACTTTTCTCCAATGGACTTTTGTTAGAAACAACTCTTCCCGAATTCCTTGTTTTGTTT
A_73_P128631,A_73_108556|506604	0.017321	0.000817872	up	2.81297	2.81297	1.49209	ISG20	interferon stimulated exonuclease gene 20 [Source:HGNC Symbol;Acc:HGNC:6130] [ENSBTAT00000065058]///interferon stimulated exonuclease gene 20 [Source:HGNC Symbol;Acc:HGNC:6130] [ENSBTAT00000019639]	AGCACGACTTCAAGGCGCTGAAGGAGAACATGAGCGACTACGCCATCTATGACACGGCTG///TCTTCAGAACAAAAACTTTGTTGCTTTTGTAAAATGCATTTTTAGCAGTAAAATAGCTCT
A_73_P050891,A_73_114349|338066	0.0155841	0.000234142	up	2.81013	2.81013	1.49064	ADGRE5	Bos taurus adhesion G protein-coupled receptor E5 (ADGRE5), mRNA [NM_176661]///adhesion G protein-coupled receptor E5 [Source:HGNC Symbol;Acc:HGNC:1711] [ENSBTAT00000029084]	CATCTTTGTGATTACTGTCTGGAAACTCACTCAGAAGTTTTCTGAAATCAACCCTGACAT///TTTTAGGTTAAGCTAAAACTGAGGCTGGGTGGGAGAGGGGCAGGGCCCTTCTCAGCTCCT
A_73_101476	0.0155841	0.000282229	up	2.80777	2.80777	1.48942		tryptophan hydroxylase 2 [Source:HGNC Symbol;Acc:HGNC:20692] [ENSBTAT00000027708]	GCAGCGATTTGAACACCGTGTGTGATGCCTTGAACAAAATGAACCAGTATCTGGGGATTT
A_73_111783	0.0322197	0.00576891	up	2.80243	2.80243	1.48668			CTTCTGCTGACTTCAAACATGCCAAAGAATTAAGAACAGATTGGGTGTCATTTCAGAATA
A_73_P073491	0.022336	0.00225822	up	2.80209	2.80209	1.4865		calcium/calmodulin dependent protein kinase ID [Source:HGNC Symbol;Acc:HGNC:19341] [ENSBTAT00000011406]	GACTTAATAGGATCTGGTGCTGTACATATGAATCTCGCAAAGCTCTAACAGAACGGACTT
A_73_106577	0.0240174	0.00287981	up	2.80149	2.80149	1.48619		Rep: Procollagen alpha 2(V) precursor - Sus scrofa (Pig), partial (8%) [TC469596]	GAGAAAACTTTTCTTCCTGGCAGATAGCTTAAAGAGTGGGGTATATAAAATCACAAAATG
A_73_P146991	0.0265432	0.00375393	up	2.79962	2.79962	1.48523			CTACCTTTGTGGATTAAAATCTGTGATTAACATGCATATGTGTGAGCACTGTGGCTGTGG
A_73_P092281,A_73_120379,A_73_P104981,A_73_P104976|505940	0.0180999	0.00097882	up	2.79868	2.79868	1.48475	ARHGEF2	Bos taurus Rho/Rac guanine nucleotide exchange factor (GEF) 2 (ARHGEF2), mRNA [NM_001098881]///Rep: MGC152523 protein - Bos taurus (Bovine), complete [TC428068]	TAGTCCACGAGATTTCACCCGAATGCAGGACATCCCGGAAGAGACTGAGAGCCGAGATGG///TGTTGTCTGTGATACTCACAAGGATAAAAATGAAGGGACACTTAGGTTCCAGCAGCTGTT///CGTAGGCAGTGGGCCATTATTTGGATTGTATTGTCTTTTACCTTCATTTTCTAAAAATGA///TATGCACAGGTTCAGCATCCATGGATTCAACCAAGCATGGGTCAAAAATACTCGAAAAAA
A_73_P101171,A_73_P047176,A_73_115220,A_73_P308436|282194	0.0167188	0.000705475	up	2.79754	2.79754	1.48416	COL6A2	Bos taurus collagen type VI alpha 2 chain (COL6A2), mRNA [NM_001075126]///collagen type VI alpha 2 chain [Source:HGNC Symbol;Acc:HGNC:2212] [ENSBTAT00000025663]	AGAATGGGGCAAAAGGAAGCAAGGGCTATCAAGGCAACAATGGAGCCCCAGGAATTCCTG///CCAAGCGTGTCCTTCAGGTGCTGTGAGATCATCTCAGACATTCTATAAAAGCTGAAAAGC///CGTCTTCCGCGAGAAAGACTACGACAGCCTGGCCCAGCCCGGCTTCTTCGACAGGTTCAT///TTTTGCCATATAAGGTCACAGTCACAGAATCCAGGATTAGGCTCTCTCAGGGGCCATTAT
A_73_P037176|281790	0.0193632	0.00130786	up	2.79208	2.79208	1.48134	GNAI1	Bos taurus G protein subunit alpha i1 (GNAI1), mRNA [NM_174324]	ATCTCTCTATGACCTTGTTTTCAGCAAAGTGAACAGCATTCCATACCTTACTTCTCTTTT
A_73_115907	0.0200148	0.00154815	up	2.7872	2.7872	1.47882		Rep: Chromosome 3 SCAF14978, whole genome shotgun sequence - Tetraodon nigroviridis (Green puffer), partial (13%) [TC404587]	GCAGTGATCATCTAACGGTTCCGTGTATCCTTACAGAAATAAAGCAGCATATAAATAAAA
A_73_P499223,A_73_P066891|523367	0.0237533	0.00279964	up	2.78621	2.78621	1.47831	SHCBP1	Bos taurus SHC binding and spindle associated 1 (SHCBP1), mRNA [NM_001192579]	GACTTATTGTTGACTACCAAAATCTGTTGACTCAATGTGAGGAGAGTTACAGGAAATTTT///ATTGTGGGGAACCAGTTCAAGTGGAATGGGAAAGGGAGTTTTGGCACATTTCTTTTCTGA
A_73_P110541,A_73_101127|506029	0.0213233	0.00199202	up	2.77921	2.77921	1.47467	STRADB	Bos taurus STE20-related kinase adaptor beta (STRADB), mRNA [NM_001192081]	CTCCAGGGAAACTTTGGAATTATTACTCTAACTACATTTAGTATCATCTGTAGATGACAG///CTAGAATTATACTTGAAAATACAGTTGGTGCACTGGAGAATCTGTCATTTAAAACCACTC
A_73_102649,A_73_P435441,A_73_P105266,A_73_P112641|767904	0.0260026	0.00356173	up	2.77871	2.77871	1.47442	MGC126945	Bos taurus uncharacterized protein MGC126945 (MGC126945), mRNA [NM_001076983]	TCGCAGGATTCGCGGTCGAACTTGAAGGTCATCGTTGGCAACCACAACCACAGTGAGCTG///ATATTTTGGTATCGCGTCCTGACCTCGGGAGGGACCTTTATCAATCTGTCGGTTATCTGG///CCCCACCATTGTGTAATGGTATCATAGGTGTTTGTGTATCATCGTATTGTTTATTTACAT///ACCTTTATCAATCTGTCGGTTACTTGGACGACACGCAGTTCGTAAGATACAACAGCGACA
A_73_103502,A_73_P064101|519541	0.0230085	0.00246401	up	2.77521	2.77521	1.4726	RNF125	Bos taurus ring finger protein 125 (RNF125), mRNA [NM_001205859]	AATATAAGGCTGAGTATGTGGGTGAAGGATCTTTATTTGCAAATCGGATGACGTTGTGTG///GATGGGCAGAAAAATGTACAACACATTATATGTTCGTCCATGTCTATTGTTGTATCGCAT
A_73_102442	0.0198435	0.00147457	up	2.77499	2.77499	1.47248		PREDICTED: Bos taurus wingless-type MMTV integration site family, member 10B, transcript variant 1 (WNT10B), mRNA [XM_586498]	CAGCAGGAGGGGTGGGAAAGGCTAATTTATTGTACTGAGACTTGTTCTTGGTTCTTGTTT
A_73_110441,A_73_P104841|530961	0.0338634	0.00639594	up	2.77239	2.77239	1.47113	BARD1	Bos taurus BRCA1 associated RING domain 1 (BARD1), mRNA [NM_001192701]	CAAAGTCTGGATGGCTCCTTCCAGCTGGTTTATAGATTGTGTGATGTCCTTTGAGTTGCT///CTGTGAAAAATGATGAAAATGCTCAGCAGACCTCCATGTACGAATTTGTCTCTCCGAGCC
A_73_P299331,A_73_114269,A_73_P452391,A_73_P168812|529062	0.017321	0.000810553	up	2.77216	2.77216	1.47101	ANKRD28	Bos taurus ankyrin repeat domain 28 (ANKRD28), mRNA [NM_001205960]	GTGACTGCTTGAATACTGTATTTACTTGCACTCTTTCAGTACATCAAGATTCCTGTATAT///ATGATGCCTATCTCGTCAAGTAGCCCTTTATCATCCCTGACGTTCAATGCCATTAACCGT///TGCAGCATTTAAGGGCCATGTAGAATGTGTGGATGTTCTCATTAATCAGGGAGCCTCAAT///AGCAAATAACCTCCTTTAACAAGACAAACAGTACCGTTTAGTTCAGGAGCTAAGTATAGC
A_73_P048966|280841	0.0233187	0.00261916	up	2.77036	2.77036	1.47007	LOX	Bos taurus lysyl oxidase (LOX), mRNA [NM_173932]	CGTATTAGAAAGCAAGCCAAAACTCCCAAAGGATATATCAGTGCCTGGTGTTCTGAAGTG
A_73_P044386|617420	0.0162642	0.000558834	up	2.76788	2.76788	1.46878	ISG12(B)	Bos taurus TLH29 protein precursor-like (ISG12(B)), mRNA [NM_001076457]	CCTGCCTCCCCAAATTCTTCAAAGAATCATAAGAAATAAAGTTGAGATGCAGTGACCTTC
A_73_119981	0.0201908	0.00164051	up	2.76513	2.76513	1.46735		PREDICTED: Bos taurus calcium [XM_605252]	ATCTGGTGCTGTACATATGAATCTCGCAAAGCTCTAACAGAACGGACTTTCTCAGTTCCT
A_73_110101,A_73_P128691,A_73_P105991|528174	0.0302523	0.00498641	up	2.76485	2.76485	1.4672	ADGRD1	Bos taurus adhesion G protein-coupled receptor D1 (ADGRD1), mRNA [NM_001034564]///Rep: Isoform 2 of A6QLU6 - Bos taurus (Bovine), complete [TC394238]	GGAAAGAATTGTGTGTTTAAAGTAGTTTATAGCACAGGAAAGGTGATGAATGCAACTATG///TGCCCAAGAGCACCTAGAAGTGAGAACACTGTATTCCTAAGATTTACACTTGGATTTTTT///TTTTACAGATGTGTGCACAGCAACTGTGGCTATTTCTGTTTTACAATAAATGTTGTCGGG
A_73_P040226,A_73_P189357|539519	0.0234605	0.00267258	up	2.76461	2.76461	1.46708	MLLT11	Bos taurus myeloid/lymphoid or mixed-lineage leukemia; translocated to, 11 (MLLT11), mRNA [NM_001076169]	CCATTCCTCCCCAAATTATTGCTGATTTGTGCTGCCATTTAATCACTTCTTTAATAAAGA///TTGATAACAGGAAGTTATGAGGGACCCTGTGAGTAGCCAGTACAGCTCCTTTCTTTTCTG
A_73_P092776,A_73_P402111|541044	0.0442284	0.0107435	up	2.75821	2.75821	1.46373	RBM15	RNA binding motif protein 15 [Source:HGNC Symbol;Acc:HGNC:14959] [ENSBTAT00000052066]	ATGGTTATGCTATTCTTCTGGCTGTGCCTGGAAGTTCTGATAGCAGGTCCTCTTCTTCTT///ATAGGACACCACCCATACTGTACAGAGATCGTGATAGGGACCTTTATCCTGACTCTGATT
A_73_P060081,A_73_P446826,A_73_P388821|513594	0.0467004	0.0118857	up	2.75778	2.75778	1.46351	CEP55	Bos taurus centrosomal protein 55kDa (CEP55), mRNA [NM_001205761]	TAAGTGCAATATCCAATATCCAGCCACCGAACACCGAGATCTACTCGTCCACGTTGAATA///TCAATCTCTGCCTACCTTGGAGCCAGTCGCCGTTCCCTGGCGCTCACTTTGTGCCTGTCC///GCAGATGTACAACATCTAGAAGATGACAGGCATAAAACAGAGAAAATACAGAGGCTCAAG
A_73_118945	0.041829	0.00969986	up	2.75697	2.75697	1.46309		AV617282 Bos taurus ovary fetus Bos taurus cDNA clone E1OV010D09 5', mRNA sequence [AV617282]	TCATGGGCCGGTTTTATGAATGGGAACCATTTGCAGAAGTCAAGGGCAATCGGAAGTGTG
A_73_107858|535781	0.0363328	0.00735587	up	2.74967	2.74967	1.45926	CCDC186	coiled-coil domain containing 186 [Source:HGNC Symbol;Acc:HGNC:24349] [ENSBTAT00000031607]	TGCCCAGCACTGTTGGAAACTTCTCCCTGCTTTGTGTGTCAGCCAGTAAAAAGTTTGTTT
A_73_P331481,A_73_P260776,A_73_P039401|522400	0.016629	0.000673098	up	2.74719	2.74719	1.45796	KRT80	Bos taurus keratin 80 (KRT80), mRNA [NM_001077952]	AATGCTATATATTATACTACCTGGAGAGACAGCACATGTTCTAGCCAACCCACCCCACTG///AAACTCACATCTCAATTCTTGTGTTGCCTCTGACTAGGAACCAAAGTGAGTGCCCTCACT///TTGGGGGGTAATGCCCCCTTCTCCCTCAAAGGGATGAAATAAAGTGCTGAGATTATTCAT
A_73_P154462,A_73_119030|505463	0.014751	6.9905e-05	up	2.74421	2.74421	1.45639	GADD45A	Bos taurus growth arrest and DNA damage inducible alpha (GADD45A), mRNA [NM_001034247]	CTTTGTAGTTACTCAAGCAGTTACTCCCTACACTGATGCAAGGATTACAGAAACTGATGT///TGCTTTGTTAAAGTTTAAATGTGCAGCCATAGTTTGGGTAATTTTGGTTTTTATGCCCTC
A_73_104842	0.0302276	0.00496999	up	2.74348	2.74348	1.45601		PREDICTED: Bos taurus uncharacterized LOC100847194 (LOC100847194), miscRNA [XR_139442]	ATTCTGTTGGTGCATTGCTTTTCTGTATTCAACTTTCCTATGAATTGAGCTGTGAACCGA
A_73_P128636,A_73_P094201,A_73_P414656|538826	0.0208006	0.00182135	up	2.74309	2.74309	1.4558	SSFA2	Bos taurus sperm specific antigen 2 (SSFA2), mRNA [NM_001192097]	TGAGAGCTTGAAACAACCAATGATACTCCCTCCACTGCTGTTAATTAGTGTCACTTCCAA///TGATACTCCCTCCACTGCTGTTAATTAGTGTCACTTCCAAGAAGAAAAATTATCCTGTTG///TTTTTTCCCAAGCAACATCAGAGTCATCGTCTGTATGTTCTGGTCCCTCTCATGCCAGTA
A_73_107989|282178	0.0358037	0.00713331	up	2.73832	2.73832	1.45329	CHRNA7	Bos taurus cholinergic receptor, nicotinic, alpha 7 (CHRNA7), mRNA [NM_174515]	CATTGGCATCCTGATGTCGGCGCCCAACTTCGTTGAAGCTGTGTCCAAAGACTTCGCTTG
A_73_P043846|615135	0.0196941	0.00141371	up	2.73783	2.73783	1.45303	IPMK	Bos taurus inositol polyphosphate multikinase (IPMK), mRNA [NM_001035462]	CGTCATACAGAGCTTGGTGCATATCTAAATTCATGCTTCTGTTTCATTCTTACTCAAAAC
A_73_100200,A_73_P049211|281736	0.0449144	0.0110843	up	2.73634	2.73634	1.45225	CXCR4	Bos taurus C-X-C motif chemokine receptor 4 (CXCR4), mRNA [NM_174301]	GAAATCACTTAGGCTAGAAATGATTCTCAGCTATTTGTAAATAAGTGATCTCTCCATTCC///GTCTGAATCTTCAAGTTTTCACTCCAGCTAACACTGGACTTTTGTACATTAAAGAACTTT
A_73_119197,A_73_P108266|404186	0.017321	0.00081136	up	2.73198	2.73198	1.44994	IGFBP6	Bos taurus insulin like growth factor binding protein 6 (IGFBP6), mRNA [NM_001040495]	CCCTCACCCCTGGGGCCTCACATGTGGAAAGATTGTTGGTGTCGGCTTGGGGTGTTAATA///TACGTGCCTAATTGTGACCATAGGGGCTTCTACCGGAAGCGGCAGTGCCGCTCCTCCCAG
A_73_P038106|524530	0.014751	4.39715e-05	up	2.73114	2.73114	1.4495	CCND1	Bos taurus cyclin D1 (CCND1), mRNA [NM_001046273]	GTGTTTTCCTTTGCTCTTTTTCCCTTCCGTCTCTGACTTAAGCAAAAGAAAAAAGTACCC
A_73_115461,A_73_P145901|614159	0.0236177	0.00273179	up	2.7258	2.7258	1.44668	C24H18orf54	chromosome 18 open reading frame 54 [Source:HGNC Symbol;Acc:HGNC:13796] [ENSBTAT00000010737]///Bos taurus chromosome 24 open reading frame, human C18orf54 (C24H18orf54), mRNA [NM_001206167]	TTTTCACATCGCTTAAACTGACAGTTAACTATAAGCCATACGTTATTCTGTGATTGGTTC///TTATCTCGCCTGAGAGACCTGGTTGATGATACCAGTGGGAAACAGTCACCGAAAATATGA
A_73_P277341,A_73_106703|537689	0.0428549	0.0101575	up	2.71884	2.71884	1.44299	AFG1L	Bos taurus lactation elevated 1 (LACE1), mRNA [NM_001192915]	TTCAGGTCACTGACATTGCTGATGCCATGATTTCTGAAACAGCTTTTTGAAATCTGTTCA///TGCAGGAAAACTCTACTACCTCACAAGTGAAGCTGATGTGGAGGCTGTCATGGATAAGTT
A_73_120181,A_73_P478233|520954	0.029542	0.00472352	up	2.71779	2.71779	1.44243	SGMS2	Bos taurus sphingomyelin synthase 2 (SGMS2), mRNA [NM_001205877]	CCAAAGAACATGCTACTCCTTCCTTATTCTTTCTCCAGGAAAGCTCTCTACTTCAGAATT///TTTATACCTATATCGCTGTATCACAATGTATGTCACTACCCTCCCGGTGCCTGGAATGCA
A_73_116297	0.018312	0.00102877	up	2.70474	2.70474	1.43549		Rep: EH-domain containing 4 - Mus musculus (Mouse), complete [TC448711]	TTTTTTCCAGGTAAACATGGGCCGAATTTAAGTGTACCAGGCGACATGTTAATTAGCCAA
A_73_103031,A_73_P255661|535222	0.0358818	0.00718264	up	2.70084	2.70084	1.43341	EFEMP2	Bos taurus EGF containing fibulin like extracellular matrix protein 2 (EFEMP2), mRNA [NM_001076049]	ATCCTAGCAGCTCTCTGAGTCTCAGTGTTCCAATCCATAAAATGAGGCCACTGGATTGTT///TTCAGATCCGTGCTGGAAACTCGCAGGGAGACTTCTACATTAGGCAAATCAACAATGTCA
A_73_113805,A_73_P320316|538789	0.018312	0.00102558	up	2.69653	2.69653	1.43111	NDC80	Bos taurus NDC80, kinetochore complex component (NDC80), mRNA [NM_001206583]	CTCCTTACAATGAAGTCTCATGACCACATCCTCCCAAGCCCGTGAAGTATTTTTATAGCT///CAATGAAACAGGAGAATTCTCGACTACAGAATATTGTTGACAACCAGAAGTACTCGGTTG
A_73_P260471,A_73_108724|538680	0.0236177	0.00273223	up	2.69275	2.69275	1.42908	BCL11A	Bos taurus B-cell CLL/lymphoma 11A (BCL11A), mRNA [NM_001076121]	CAACACGCACAGAACACTCATGGATTAAGAATCTACTTAGAAAGCGAACACGGAAGTCCC///CCAAACCCCTTGTTTCTATACATTCTATGTTGTCTTTTAAGAAGTGTGCTTAACATTGAC
A_73_P114511	0.0289136	0.00454353	up	2.68959	2.68959	1.42739		Rep: StAR-related lipid transfer protein 9 (StARD9) (START domain- containing protein 9) - Bos Taurus, partial (15%) [TC447328]	CCAGTGTGAATGAAGCTCAACTCACCTTTTTGGGTTTCTCACTTTTTCCTGTCTCTGGGA
A_73_116581|526609	0.0161316	0.000383619	up	2.68875	2.68875	1.42694	SLC31A2	Bos taurus solute carrier family 31 member 2 (SLC31A2), mRNA [NM_001034556]	AATCACTGCTGTCTACTGTAATGTCTACATTCAAGTACCTCATGGGCGAGAGGAAAGATG
A_73_P044936,A_73_P170362|519269	0.0196161	0.00138607	up	2.6842	2.6842	1.42449	RRAS2	Bos taurus related RAS viral (r-ras) oncogene homolog 2 (RRAS2), mRNA [NM_001099010]	GCATTTCACTGTTCTTGGCATTTTAATTTAACTCTTTTTCACAGCCATGTTGAGAGTGAA///CAAAATACCAAAATGCCTATTGGATTTATAGGGTTAAAAACTGCGTGTAAAGCCTTTGCT
A_73_102874	0.0156692	0.000303584	up	2.68416	2.68416	1.42447		Rep: MGC139093 protein - Bos taurus (Bovine), complete [TC393173]	TCAAGCGTTTATAAGACTAAGTGGCACTGTATATTTTATAACCTCGTTGAGAAGACTAAG
A_73_P048051,A_73_P256341|540452	0.0236451	0.0027433	up	2.67778	2.67778	1.42104	SBSN	Bos taurus suprabasin (SBSN), mRNA [NM_001104997]	GGATTTCTAGAGTCCCTTAGGGGTCAATACTGAGACTTGTGAATAAATACAATATACTAT///AATCACTCAAGCTGGAAGGGAAGTGGAGAAAGTTTTTAATGGACTCAGCAGCATGGGGAA
A_73_P067616	0.0308033	0.00519704	up	2.67682	2.67682	1.42052		mitogen-activated protein kinase kinase kinase 10 [Source:HGNC Symbol;Acc:HGNC:6849] [ENSBTAT00000047929]	AGATTTTGGCAGCATCTTGAAGCAACTTGAAGTCATCGAACAGTCAGCCCTGTTCCAGAT
A_73_P079806,A_73_P487618,A_73_112194|505206	0.0190141	0.00122301	up	2.67303	2.67303	1.41847	EHD4	Bos taurus EH domain containing 4 (EHD4), mRNA [NM_001192053]	TTATCAGCAGGTTGCCAGAAATCTACATTCAGCTACAGCGAGAATACCACATCTCTGCAG///AGAGACATCCAGAGCCTTCCCCAGAAGGCGGCAGTGCGCAAACTCAATGACCTCATCAAG///CCTCAGAGAGCAACGGGAGGCAGCAAAGACCAGCTTATTTATTTTGTTCCCTGCTTAATT
A_73_120502	0.0176142	0.000892686	up	2.67297	2.67297	1.41844		702043 MARC 6BOV Bos taurus cDNA 5', mRNA sequence [CB447990]	ACTCAGAGGAAAAGGTATGCATGCAGCGATCTTCATAGTATGGTGCAGTGGCCAGATTTT
A_73_P492777	0.0239218	0.00284296	up	2.67284	2.67284	1.41837		PREDICTED: Bos taurus melanoma antigen family B, 4-like (LOC782703), mRNA [XM_003585379]	TTCCACGGTAGGGTCCCTAGTTCCTTCCCAGACCTTTATGACGAGGCGCTGAGAGATCAG
A_73_P267076,A_73_P032861|508820	0.0233	0.00260098	up	2.67027	2.67027	1.41699	LOC508820	Bos taurus melanoma-associated antigen 9-like (LOC508820), mRNA [NM_001075373]	ATGAGATGATGACTAACCTTATGACGTTCCTGCTCCTCAAGTATCGAGCCAAGAAGCTGA///GTCTTCCATTTTGTTTTGTGGTCCTGAACAGAATACAATGGAATAGGAATTAGAACTGTT
A_73_104384	0.0328718	0.00600478	up	2.66935	2.66935	1.41649			TATGGGTATATTTCCTTTTGTCCTAAAGTCATTTCATCTCCATGCCAATAAAAGTTGTCG
A_73_111525	0.023162	0.00256895	up	2.66861	2.66861	1.41609		PREDICTED: Bos taurus guanine nucleotide binding protein (G protein), gamma 2 (GNG2), transcript variant X1, mRNA [XM_005211654]	AGCAGAAAAACCTGAATGTGATGTGTACACTTTCACCCCCTCATAGACAATGTATTTGTT
A_73_113369	0.0198435	0.00147335	up	2.66625	2.66625	1.41481		Rep: Predicted protein - Chlamydomonas reinhardtii, partial (6%) [TC426014]	ACCCCGCAGATTCTCCTGGTTCTAACCCAGGGGGTGTTTGCGTCACCCCCTTTTACTTGT
A_73_100558	0.0161901	0.000514754	up	2.66375	2.66375	1.41346		PREDICTED: Bos taurus lipase, endothelial (LIPG), mRNA [XM_586851]	CTCCTTTGGCTTGAGCATCGGCATTCAAATGCCCGGGGGTCACATCGACATCTACCCCAA
A_73_P393901,A_73_120738|100124500	0.0420281	0.00977383	up	2.66365	2.66365	1.4134	DUSP27	Bos taurus dual specificity phosphatase 27 (putative) (DUSP27), mRNA [NM_001102543]	ACAGAACTGGATTGCCAACGTAGTCAGTGAAACTCTCGCCCAGAAGCAAAATGAAATGCT///TCTCACCTCTCCCAGCAGCTGAGTTCTGGTTGTTTCTTGTGAAAGTTTTGGATCTCCATT
A_73_P094861,A_73_P082716|100300164	0.0184605	0.00108099	up	2.6623	2.6623	1.41267	EHBP1	EH domain binding protein 1 [Source:HGNC Symbol;Acc:HGNC:29144] [ENSBTAT00000061137]	TACTTGAGCAAGCAAGAAGAGATGCAGCTTTAAAGGCAGGGAATAAGCAGCATACCAACG///AGAAACCGGACCAGAATCCTGACCAACATTTTATTAGCCTTGGGTTCCCCAGACCATAAA
A_73_P256891,A_73_114061|514695	0.0272858	0.00400806	up	2.65481	2.65481	1.40861	NECAB3	Bos taurus N-terminal EF-hand calcium binding protein 3 (NECAB3), mRNA [NM_001081589]	TTTAACAGTGTGTTTTATTGCTTATAGCTTCGGCCTCTGAGATACTCTGGCCTCAGGAGG///ATTTGCATATTATTTGCATGCTTATTCCCACCCTTACTCAGGGCACTATGGGAAGCCCCA
A_73_P084746,A_73_107353|513032	0.0339659	0.00643972	up	2.65158	2.65158	1.40685	N4BP3	Bos taurus NEDD4 binding protein 3 (N4BP3), mRNA [NM_001205742]	AGGCGGAACTGGCTCAGAAGCTAGCTGAGATCTTCAGCCTGAAGACACAACTTCGGGGCA///TGTGAGGAGGGGAGGCTGGAATGGGAACTTTGGCCTCCCCAGAATAAAATCACATTTTCT
A_73_119070|513275	0.0176082	0.000881157	up	2.64935	2.64935	1.40564	STX3	Bos taurus syntaxin 3 (STX3), mRNA [NM_001101971]	TGCTGGGCATTTTAGCGTTGATTATCGGACTTTCCGTTGGGCTGAAGTAAGGGCGGCCGC
A_73_101716	0.0184562	0.00107794	up	2.64757	2.64757	1.40467		Rep: Reverse transcriptase-like - Bos taurus (Bovine), partial (29%) [TC420215]	GTTACTCTGTAACAAATAGGCAAATCTCTTGGTTGTAGCTCATTTGTACAAAAATAATGT
A_73_116014|282104	0.0154489	0.00014577	up	2.6464	2.6464	1.40403	TUFT1	Bos taurus tuftelin 1 (TUFT1), mRNA [NM_174479]	GTCCTTCCAGTTCTGATACTCTTTCCCATGGCATATTCTTTGTATGGTGAGTTTAATAAA
A_73_P078291	0.031413	0.00541052	up	2.64584	2.64584	1.40373		LB0044.CR_D12 GC_BGC-04 Bos taurus cDNA clone IMAGE:30957683, mRNA sequence [DT829342]	CTGCTGAAAATGGAGGGGCCAAAATTATAGAGGCACCAGTTCCTGAAAGAGAAATAGAGG
A_73_P067506|787634	0.0161901	0.000490391	up	2.64462	2.64462	1.40306	C18H19orf33	Bos taurus chromosome 18 open reading frame, human C19orf33 (C18H19orf33), mRNA [NM_001207046]	AAGAAGAAGGCTTCCCACTGATGGCTCTGGGTGGGGCTCATTAAACCTTTGCTCGGCCTC
A_73_P379081	0.0161901	0.000427876	up	2.64152	2.64152	1.40137		Rep: Rab6-interacting protein 1 (Rab6IP1). - Canis familiaris, partial (19%) [TC459603]	AGCTGTGCAAGAGATGAGAGGAGATGTACACTCACTGTAAAAAGAAAAGTAGAGGATTTT
A_73_121458|505167	0.0110645	7.99881e-06	up	2.63898	2.63898	1.39998	CRYM	Bos taurus crystallin mu (CRYM), mRNA [NM_001045914]	CATCCTGTGTCATGCCAGATTATACTAGTGCTCCCTTTGCCCTGTATTTCACTACCTTTT
A_73_113665	0.0399282	0.00893336	up	2.63785	2.63785	1.39936			TCCTTCAGGCCACTCTGAACGTGAAGAGCGAACAAATAATTCAGCCCAGCAAATCTGTAT
A_73_P071471,A_73_P334221,A_73_P166162|539364	0.0203962	0.00170576	up	2.63652	2.63652	1.39863	BTG2	BTG anti-proliferation factor 2 [Source:HGNC Symbol;Acc:HGNC:1131] [ENSBTAT00000020860]///PREDICTED: Bos taurus BTG family, member 2 (BTG2), mRNA [XM_586687]	TCTCACCTGCAAGAACCAAATGATACTGGGCAGGAGCAGTCCTTCAAAGAACTACATCAT///CGGGAACTTCAGGTCCTTGATTATTGCCTTCTTTTTAAAAGCACACACTCCTCTCCAACT///CGGTCCCCTTTCCTGGATTGCTTAACTACTCAATTCTGACTCAGAGGTGCTATTTACCAA
A_73_114966	0.0294295	0.00469068	up	2.63509	2.63509	1.39785		Rep: Predicted protein - Botryotinia fuckeliana (strain B05.10) (Noble rot fungus) (Botrytiscinerea), partial (28%) [TC423828]	AGGTGAGTACTGGGAGATTTCCTGGTTTATTTAATATGTTTGTAACCCAGTTCAAGGAAG
A_73_P284271,A_73_119862|785347	0.0425076	0.00999208	up	2.63488	2.63488	1.39774	TRIM52	Bos taurus tripartite motif containing 52 (TRIM52), mRNA [NM_001078024]	CTGGATGTGCTATTTTCACTAAGCCTAGCACTAAAGACAGTATTTTTGAAGTTGTATGAA///CTTGTGTTTTGTTGCATTTTCTACACCATCCAGGAAAGAAAAGGCTTAACAGTGACATGG
A_73_118846	0.014751	4.70737e-05	up	2.63354	2.63354	1.397		Rep: Keratin associated protein - Bos taurus (Bovine), partial (8%) [TC418634]	TAGCCACCAGCTACAGCCTGTAAAAAATCAGCTGTTTGAGAGCCTTGTGAGTTGTCTGTT
A_73_P097671|100196898	0.014751	5.51881e-05	up	2.6324	2.6324	1.39638	LOC100196898		TTGAAGTACCTACAGCAGTCAGAGTGTTATGTCTCTGCTTCGGAGGGAACGTCAAGAAAA
A_73_P040616,A_73_P115796|100126444	0.0201342	0.00161373	up	2.6274	2.6274	1.39364	PCP4L1	Bos taurus Purkinje cell protein 4 like 1 (PCP4L1), mRNA [NM_001110445]	GAGCAGAGTTGGAATAACCACTCTGTGTGATTTTAGCATGTGTAATAATTATGAGAACAA///GCCCTTGCTATTCAGGGCAAGTTCCGGCGATTCCAGAAAAGGAAAAAGGATCCCAGCTCC
A_73_106850|536706	0.0161901	0.000428044	up	2.62434	2.62434	1.39195	EVI5	ecotropic viral integration site 5 [Source:HGNC Symbol;Acc:HGNC:3501] [ENSBTAT00000040289]	TATAGATAATTCCTTACAGGAAAGTGGCATTGGTTTCCCCTTGCACAGAAAATCTGGTCC
A_73_108162,A_73_P394031,A_73_P117436|281908	0.0154489	0.000133622	up	2.62357	2.62357	1.39153	MFAP5	Bos taurus microfibrillar associated protein 5 (MFAP5), mRNA [NM_174386]	CTTCTCCATATCATAGACCCGGTAGATAAATGATTAACGTGTCGCTTAGATAGAAACATT///TCTTGTCTGTAAAGAACACGAAGCTATGAAAGATGAACTCTGCCGTCAGAAGGCTGGTCT///TTTTGCTGCTTCTCCATATCATAGACCCGGTAGATAAATGATTAACGTGTCGCTTAGATA
A_73_114828	0.0165452	0.000612528	up	2.62354	2.62354	1.39151		Rep: Ectonucleoside triphosphate diphosphohydrolase 4 (EC 3.6.1.6) (NTPDase 4) (Uridine-diphosphatase) (UDPase) (Lysosomal apyrase-like protein of 70 kDa). - Canis familiaris, partial (45%) [TC406216]	TGCTTTTCCTTTTCCTTTTTGTTCCTTGAAACAAAACCAAACCCCACTGTTAGTAAACTC
A_73_P273421,A_73_P070936,A_73_P263461|517336	0.0433207	0.0104168	up	2.61601	2.61601	1.38737	MED13L	Bos taurus mediator complex subunit 13-like (MED13L), mRNA [NM_001192468]	AAGTTTTCTACATCCAGTACTTGAAGTCCATGGCATTTTCAGTGTACTGCCAGTGCAGGC///TTCCCGTCCACTTTGTGGTGCTCACTCAGTTGTACAATGCCATCATGAATATACTCTAAT///TAAAATTGAACAACTGCCCATGCCACCTGCGGCCACTTTCATTAGAGATGGCTACAACAA
A_73_P092711,A_73_107043|508231	0.0262871	0.0036775	up	2.61129	2.61129	1.38476	RSBN1	Bos taurus round spermatid basic protein 1 (RSBN1), mRNA [NM_001206227]	CAGTCTACAGGAACATTCAAGCACTCCTGTGTGATATGTACATATTCAAACACATTTTTT///TTTATTTAGTTTCAACCATAAAGAGCAGGTAGTTTCTAAGGAATTCAGTGGCTCTCTGAT
A_73_P115741,A_73_P260226,A_73_P033036|613907	0.0161901	0.00050185	up	2.60759	2.60759	1.38271	BHLHE41	Bos taurus basic helix-loop-helix family member e41 (BHLHE41), mRNA [NM_001076297]	GAATCCGTGCTCCACTTGAGAGGGGACCAGGGTTCACGCGGAATAATAATATTAATAAGT///AGATAATTGCTTTACAGAATGGGGAACGATCTCTGAAATCGCCCATTCAGTCCGACTTGG///AAACACCCTTAACGTTTTTAAGGGAGGAAGTGTAAGAGATGCACGACAGGCTTTAAAAAA
A_73_101022|281096	0.0464179	0.0117503	up	2.60724	2.60724	1.38252	CSF3	Bos taurus colony stimulating factor 3 (CSF3), mRNA [NM_174028]	TCTGGGGTCCCACAAATTTGCTGGGGAAACTTCGTCAAGACTTTTTTCAAGCACATTTTG
A_73_P045601,A_73_115352|282035	0.0155841	0.000166757	up	2.60578	2.60578	1.38172	RGS16	Bos taurus regulator of G-protein signaling 16 (RGS16), mRNA [NM_174450]	CCTAAATGTGAATGATGTACTTATTCAACCCCCGTTTTCCTATTGCAGCATGTTATTTTA///GGGCTTTCAAGGGCGGGAAGAATGATGGTGCAAGAGTCATCATTGGCTCTGGCCATTCTC
A_73_P122981,A_73_120742,A_73_P101596|281779	0.0162687	0.000572786	up	2.60562	2.60562	1.38163	GFPT1	Bos taurus glutamine--fructose-6-phosphate transaminase 1 (GFPT1), mRNA [NM_001109961]	AGTCAAGATACAAGTTTTACTACCTTGGTGGAGAGAGTCATCCAACAATTGGAAGGTGCT///CCGTAGAATAAGGAGCATCTGAAACTGGGCGATTAATCAACACAAGACACCTTTGTATTT///ATTACTTTGCTTCTGATGCAAGTGCTGTCATCGAACATACCAATCGCGTCATCTTTCTGG
A_73_P456036|530930	0.0306754	0.00514953	up	2.60524	2.60524	1.38142	RHOBTB3	Rho related BTB domain containing 3 [Source:HGNC Symbol;Acc:HGNC:18757] [ENSBTAT00000005786]	GCTGACATTCAGGATTCCAGTATCATCCAGACCACCCAGGATCTCTTTACTATCAACAGA
A_73_P304471,A_73_P037096|615037	0.0245617	0.00305987	up	2.60498	2.60498	1.38127	BMP2	Bos taurus bone morphogenetic protein 2 (BMP2), mRNA [NM_001099141]	CATATGCCCGAAGCTTTGGAAAACAATAGCAGTTTCCATCACCGAATTAATATTTATGAA///AAGATGAAAAGTCTACATGGAAGGTTACTCTGGCAAAGTGCTTAGCACATTTGCTTTTTT
A_73_P110051,A_73_P189167,A_73_112081|510592	0.0190141	0.00122765	up	2.60475	2.60475	1.38114	TTC36	Bos taurus tetratricopeptide repeat domain 36 (TTC36), mRNA [NM_001040515]	ATTGTGAGTCACCTTTTTGATCTGGGAGTTGAATACCATGGGGACTCCAAATGATCAGGC///TTTGGCCAAGCCATCAACCTATTGCCTGAGAGGGCCTCAGCCTACAATAACCGAGCCCAG///GGCAAGGAGTTGGGAGATGCGCCAGCAACCAATAAAACTGTCGGTTCGCCCAACCCCAAA
A_73_P079911|516557	0.0201908	0.00163839	up	2.60075	2.60075	1.37893	SAV1	Bos taurus salvador family WW domain containing protein 1 (SAV1), mRNA [NM_001191362]	CTGGTACCTGCAAATCCTTACCATACTGCAGAAATTCCTGACTGGCTTCAGGTTTATGCT
A_73_P072451|535008	0.0184692	0.00108791	up	2.59956	2.59956	1.37827	BATF3	Bos taurus basic leucine zipper ATF-like transcription factor 3 (BATF3), mRNA [NM_001193235]	TGCGTGCTGCAGCTAAGACCCAGCTCGGCCAAACACATAAATAAAAATATTAAAAAAGGC
A_73_121354	0.022286	0.00223437	up	2.5994	2.5994	1.37818		BovGen_23172 normal cattle brain Bos taurus cDNA clone RZPDp1056F0748Q 5', mRNA sequence [CO894847]	TGCCGGGTGCCACAGGCACACACACTCCATTCGTAAGTCCTTGTGATTATAAATGAAATA
A_73_107468|282420	0.0176461	0.000905066	up	2.59663	2.59663	1.37664	CSNK2A2	Bos taurus casein kinase 2 alpha 2 (CSNK2A2), mRNA [NM_174636]	CTGGTTCGTCCTGTGGCCACCTGTTTTTCCAGCAGACCACGTTAACCAGCTGACCAGACT
A_73_P466793	0.0482668	0.0126075	up	2.59601	2.59601	1.37629		PAS domain containing serine/threonine kinase [Source:HGNC Symbol;Acc:HGNC:17270] [ENSBTAT00000001044]	TTCAGGGACTGGACAGACCGAACTTCTTCCAACTGTTCGTGTGCCACGTCTGAACTCGGG
A_73_118020	0.0279587	0.00424135	up	2.59594	2.59594	1.37626		BovGen_12483 normal cattle brain Bos taurus cDNA clone RZPDp1056B0428Q 5', mRNA sequence [CO884158]	TGCCCCAAGGAATCAGAATCTGCCTGAGATCAACTGACGTGCAGAAAATAATTCCAGACT
A_73_P326816	0.0168198	0.000723169	up	2.59351	2.59351	1.37491		PREDICTED: Bos taurus inositol 1,4,5-trisphosphate receptor interacting protein-like 1, transcript variant 2 (ITPRIPL1), mRNA [XM_587136]	GCTGGCCGGGGCACGTTGACTTGTATTCAGGCCATTAAAAAGGGGGAGATGGTATTTCTG
A_73_P440316,A_73_P279291,A_73_117691,A_73_P421616|535383	0.014751	6.68538e-05	up	2.59022	2.59022	1.37308	RAPGEF3	Bos taurus Rap guanine nucleotide exchange factor 3 (RAPGEF3), mRNA [NM_001080302]	AACTGTGTTGTTCAGCCAGGGGGACAAGGGCACCTCGTGGGACATTATCTGGAAGGGATC///ATCAGAGTTGGGGACAAAGTCCCCTATGACATCTGCCGGCCAGACCACTCCATGCTAACC///GGGGACAGAGAGGCCCTGGAGTGAGTGGGAGAGCAGAGCGTTTTCTCTCTTTGTGTTCAA///AACATGGTGCTCAAGAGGATGTATCGGTCCCGAAGCTGCTCCTACCAGCTGCTGCTCGAA
A_73_110917|526279	0.0161901	0.000418951	up	2.58825	2.58825	1.37198	CASP7	PREDICTED: Bos taurus caspase 7, apoptosis-related cysteine peptidase (CASP7), mRNA [XM_604643]	AATGACCTCTGCAAGTGACTTTTGACTGTGTCCACCATAACTGGTGGTGACTTTGGAAGA
A_73_P034801,A_73_P303921|534692	0.0152818	9.36603e-05	up	2.58822	2.58822	1.37196	SSX2IP	Bos taurus SSX family member 2 interacting protein (SSX2IP), mRNA [NM_001076036]	GCATTGGAAGTTGAGCCTTTCCTTGAATGTATACTGTAGATTTTTAACAAAGCAAGTTCT///CTACTGAAAAATGAGAAAGATGAGGTGCAGAAATTTACAAAATATCATTGCAAGTCGAGC
A_73_P205237	0.0373309	0.00781786	up	2.58745	2.58745	1.37153		PREDICTED: Bos taurus matrix metallopeptidase 25 (MMP25), mRNA [XM_010819231]	CCTCTCAGACGTCATGAAGTCAGGTTCACAAAAATGCCACATGGTATTGAATTATGTTTT
A_73_104576,A_73_P279526|507809	0.0325406	0.00588873	up	2.58628	2.58628	1.37088	RUSC2	Bos taurus RUN and SH3 domain containing 2 (RUSC2), mRNA [NM_001082427]	CAGTATTGGGGCCAGTTCCCTAAGCCCCCAGCTGTAAATAGGCTGTGGCCAGTGCCTGGC///ATCCCTGTGCTCAGTATTAATTACTCCCCATTACCTGTCCCAGTGACCTTGTCCGGACCT
A_73_118966,A_73_P264327|282182	0.0306232	0.0051268	up	2.5848	2.5848	1.37005	CITED1	Bos taurus Cbp/p300 interacting transactivator with Glu/Asp rich carboxy-terminal domain 1 (CITED1), mRNA [NM_174518]	AGACTTTCCATCTGGCAGCTGATGCCAATTGTTCCTAAAGATGGAGGAATAAAGCCACCA///ATGAGTTTGACTTCACGGCAGACTTTCCATCTGGCAGCTGATGCCAATTGTTCCTAAAGA
A_73_110457|100140137	0.0449691	0.0111131	up	2.58447	2.58447	1.36987	RNASE10	ribonuclease A family member 10 (inactive) [Source:HGNC Symbol;Acc:HGNC:19275] [ENSBTAT00000046664]	ACCACACTTGCATACCCCAGTACATATTTATCCATGAGGAACTAGATGCAGTCAAAGCTG
A_73_119435,A_73_P191152,A_73_P052126|286823	0.015973	0.000358237	up	2.58321	2.58321	1.36916	CLIC4	Bos taurus chloride intracellular channel 4 (CLIC4), mRNA [NM_001080218]	TTCATCCCTGGAGTCCATTCACTGTGTATCGATGACAGAACTTTTGAGGTGCACTGTTCA///AGTTGTGTTTAGTGTCACAACTGTTGACCTGAAAAGGAAGCCTGCAGACCTGCAGAACTT///TGCCCCAGTGATAAGGAGGTTGAAATAGCATACAGTGATGTAGCCAAGAGACTTACCAAA
A_73_P251871,A_73_117314|281259	0.0202823	0.00167926	up	2.57576	2.57576	1.365	DNAJC12	Bos taurus DnaJ heat shock protein family (Hsp40) member C12 (DNAJC12), mRNA [NM_174096]	AAGAATCCAAATCTGTGGAGAAGTCATTCTCCCCACAAAATCCAGATTCTCCAGGTTTTG///GAATTGCTGAGTACCAAATCATTCTTCCATCCTTGAACCCATTCTCTCAATGTGTTTTTT
A_73_P481643,A_73_P336151,A_73_P068006|513710	0.0462534	0.0116772	up	2.57567	2.57567	1.36495	CPT1C	carnitine palmitoyltransferase 1C [Source:HGNC Symbol;Acc:HGNC:18540] [ENSBTAT00000016188]	AGAATTCGTGTACCTGCGCTCCAGGAACTCACTGATGGTGAACAGCAACTATTACATGAT///ACTGATGGAGAAGATCAAAGAGTCTCTGCCAGACTGGGGTGGACAGCATCACAGGCTGCG///TGTTCATGGGCGATGACGTGATCACCTTCCACATCTCGAGCAAAAAATCAAGCACAAGAA
A_73_P465753	0.0490371	0.0129394	up	2.57174	2.57174	1.36274		PREDICTED: Bos taurus OTU domain containing 1, transcript variant 2 (OTUD1), mRNA [XM_608638]	GGCACTACTTAATTTGCAAGCTGATTTCTCAGTGTAAATTTGTTCATTCCTGGTAATCTA
A_73_P066236|540826	0.0180142	0.000963698	up	2.57143	2.57143	1.36257	SMURF2	SMAD specific E3 ubiquitin protein ligase 2 [Source:HGNC Symbol;Acc:HGNC:16809] [ENSBTAT00000026451]	AACTTCAAGGATTTACCCAGGACTCTATTTATAGCCTGAGGGACAGACAGCCTCCTTTCA
A_73_P086441,A_73_P434996|782201	0.0184692	0.00109137	up	2.56913	2.56913	1.36128	GNE	Bos taurus glucosamine (UDP-N-acetyl)-2-epimerase/N-acetylmannosamine kinase (GNE), mRNA [NM_001191143]	AACAGCTTTAGGTCTTGGGGTTGTGAACATCCTCCACACTATGAATCCTTCCCTTGTGAT///TGAAATAATCTCCAGGTCCTGGTTGAAACATTCCATGTTGACTCCTGGGAGGGAAACTTG
A_73_100258	0.0188405	0.00115996	up	2.56877	2.56877	1.36108		Rep: Homeobox protein Hox-C6 - Homo sapiens (Human), complete [TC404592]	GCTGTATTTGTGGTCTCTGTATTTATATTTATGTTTAGCACCGTCCGTGTTCCAATCCAA
A_73_P042146|520865	0.0225986	0.00236088	up	2.56605	2.56605	1.35955	AASS	Bos taurus aminoadipate-semialdehyde synthase (AASS), mRNA [NM_001109797]	CTCTGAACTTCTGTGCAGCAAGCATGCTTGTTAATGTGATATTTTAAAACATAAAGCATG
A_73_P046216|504853	0.019308	0.00129429	up	2.56531	2.56531	1.35913	PRRT3	Rep: Proline-rich transmembrane protein 3 precursor. - Canis familiaris, partial (43%) [TC400022]	CTTAAAGGAACTGACCAACAACTTCAAACAACTTAGGATAATAAACTACTACTCACTGGG
A_73_108493|286770	0.023143	0.00255999	up	2.56316	2.56316	1.35792	DNAJC3	Bos taurus DnaJ heat shock protein family (Hsp40) member C3 (DNAJC3), mRNA [NM_174756]	CTGGAACTCATGGCAAGGGTTCAGTCCCTTTAGCTCAGGCGGACCTTTTAGATTTAAATT
A_73_101681|540705	0.0324659	0.00585631	up	2.56308	2.56308	1.35788	ETNK1	ethanolamine kinase 1 [Source:HGNC Symbol;Acc:HGNC:24649] [ENSBTAT00000007669]	CAAGAAATATACCTACTGCTTTCAGTATGTGGTGGGTTAGAAGTTTGTTAAATCGGCAAA
A_73_119309	0.0294899	0.00470815	up	2.55797	2.55797	1.355			CTGCCTCATGCCCCTCTTGAGCACTGATGATAATAAACTCCCCTGTTGTTGCTCCCCTAA
A_73_P142246	0.0155841	0.000183493	up	2.55731	2.55731	1.35463		Rep: Transcriptional activator protein Pur-beta-A - Xenopus laevis (African clawed frog), partial (6%) [TC408333]	TCAGTGCTGCCAACATATCTTATTACTGTTTACTGAAGAGTCGTGTCTAAATAGAGAGAA
A_73_P048096,A_73_107383|282299	0.021223	0.00195176	up	2.55583	2.55583	1.35379	PAFAH2	Bos taurus platelet activating factor acetylhydrolase 2 (PAFAH2), mRNA [NM_174570]	AAGTATGGCTTCTGCAGTGGAAGAAATGAAGCCAAAGGATGGAGGGAAAATTCCCACCAT///TGAGGTCCTAGCCTCAGAGTGAAGTCAAGCTGTAGACTGAATTTCCGTTTTGTCCCATTT
A_73_P304316,A_73_P045781|282589	0.0184091	0.00107098	up	2.5532	2.5532	1.35231	HSD11B1	Bos taurus hydroxysteroid 11-beta dehydrogenase 1 (HSD11B1), mRNA [NM_001123032]	ATTATCAAAGGGGGAACTCTGCGCCAAGATGAAGTATATTATGACAGTTCAATCTTGACT///ATTTATAAACAACTAGGCACTTCCTGAGGGCTAGGCATCATAAAGGGAGCTTGGAACAAT
A_73_P082156,A_73_101259|613599	0.0223893	0.00229018	up	2.55097	2.55097	1.35104	LOXL3	Bos taurus lysyl oxidase like 3 (LOXL3), mRNA [NM_001192969]	AATGTAACTGCAAATATGATGGACATCGCATCTGGGTGCACAACTGTCACATTGGGGATG///TTTTTGTGGGGGGAAAGAGCAGTGTTCCACCCTTCCCCTCATTTTTCAGTATGACATGTT
A_73_P047516,A_73_108138|507203	0.0198585	0.00148064	up	2.54509	2.54509	1.34772	ANP32E	Bos taurus acidic nuclear phosphoprotein 32 family member E (ANP32E), mRNA [NM_001075306]	GGGCCTCTCATACTTGATGAAAGAAGAAATTCAGGATGAAGAAGATGATGATGACTATGT///GTGTGCAATAGAGTGATCACATCTTCTTTGTTTCTTCTTGTATGATAGCTATCCCTCCAG
A_73_108139,A_73_P435656|508941	0.0178544	0.000943169	up	2.54439	2.54439	1.34732	CYR61	Bos taurus cysteine rich angiogenic inducer 61 (CYR61), mRNA [NM_001034340]	TCAGGTGTTTTAAGACTGAATGTTTTTATTTATCAAAATGTAGCTTTTAGGGAGGGAGGG///AATTAATTGCAGTTGGAAAAAGCGGCTTCTTGAAGCGGCTCCCCGTTTTTGGAATGGAAC
A_73_P045516,A_73_P057012|768057	0.0172967	0.000793721	up	2.54436	2.54436	1.3473	HIGD1A	Bos taurus HIG1 hypoxia inducible domain family member 1A (HIGD1A), mRNA [NM_001077114]	GTGAATTCTCGTCTAACCTGAATTTACATTCCATGGTGATAACATGGTAAATGTAGTGTT///GGCTGGTTGGCTCTTGAGGAACCCTTTCAGAACAGTGCATGGAATACAACATTATAAACC
A_73_117662|531482	0.0265766	0.00376484	up	2.54221	2.54221	1.34609	MORN3	Bos taurus MORN repeat containing 3 (MORN3), mRNA [NM_001040550]	GATCCCGACGGTGTGTTGGAGGAAGCCTTGGCCATGTTCAAGAAGACAAAAGAAGAAGGA
A_73_P034096|616886	0.0280617	0.00428898	up	2.53778	2.53778	1.34357	IGFBPL1	Bos taurus insulin like growth factor binding protein like 1 (IGFBPL1), mRNA [NM_001099161]	GATCAGTGGTTTTCAAACTTTAAAACATTGGAACCCCTTCTTTGAATAAAGTCAGAACTG
A_73_120391	0.0179094	0.00095216	up	2.53332	2.53332	1.34103		Rep: Ras-related protein R-Ras2 precursor - Homo sapiens (Human), complete [TC417910]	GAATGTGTACAACAGTTTCATGAAGTTTATAAAGCGTACCCTTGTATAGCTTCAGGTGCT
A_73_102197	0.026226	0.00364724	up	2.52895	2.52895	1.33854		Rep: Ribosomal protein S8 - Halimeda cuneata, partial (13%) [TC417845]	CGATTAGCATTGAAGTTACTTTTAAAGGTCACTAAGAGAGTCATCCTTTTATTCAACTGC
A_73_P072811,A_73_P037366|522920	0.0185285	0.00110245	up	2.52834	2.52834	1.33819	ATAD2	ATPase family, AAA domain containing 2 [Source:HGNC Symbol;Acc:HGNC:30123] [ENSBTAT00000061524]///Bos taurus ATPase family, AAA domain containing 2 (ATAD2), mRNA [NM_001099020]	GTAATCAGCCAATGTATTTATCAGCATCGCAGGGACTATGACAAAACAGCACTCATTCAG///TTCTGACTCAGGAAATGCTGTCCACCCTGAGCCAACAGAATGATTAAAAGTTTTCCCAGC
A_73_P073606	0.0161901	0.000488744	up	2.52496	2.52496	1.33626		LB02968.CR_B13 GC_BGC-29 Bos taurus cDNA clone IMAGE:8478063, mRNA sequence [EE364781]	AATCGAGTGACTGGTCTGTTCCCAGGAAACTATGTGGAATCAATCATGCACTATACTGAT
A_73_P221242,A_73_P036946,A_73_P293851|614260	0.0255821	0.00342374	up	2.52488	2.52488	1.33622	ZNF75D	Bos taurus zinc finger protein 75D (ZNF75D), mRNA [NM_001078043]	GTCAGAGAAATGTTCTTGTTTCCAGTGTTGTCACATCTTGTGTCTGTCTAAGTTAATAAA///AGTTGACATCTAAGCTCACCTTGCCTAAGTCCCAGAGTCCATTGACATTTGAAGATGTGG///GTCTGGTCAGAGAAATGTTCTTGTTTTCAGTGTTGTCAAATCTTGTGTCTATCTAAGTTA
A_73_P128486	0.0196059	0.00137559	up	2.52385	2.52385	1.33563		LB02629.CR_H06 GC_BGC-26 Bos taurus cDNA clone IMAGE:8220728, mRNA sequence [DV884079]	ATCAGACATGTAGATAGGTAGTATTTGTAAAATGCTGCAGAGGAACAGCATTATTCCCAA
A_73_P252426,A_73_P258641,A_73_P261761,A_73_P252841,A_73_P043261,A_73_P209942|509056	0.017321	0.000809294	up	2.52178	2.52178	1.33444	FHL1	Bos taurus four and a half LIM domains 1 (FHL1), transcript variant 2, mRNA [NM_001113259]	TATTACTGCGTGGATTGCTACAAGAACTTTGTGGCCAAGAAGTGTGCTGGATGCAAGAAC///TAGCTGCTTAGTGATGCAAGCAAAAAGCCTAAGCGATAAAGCCCCACTGATACACCTCTT///TGACCACCTAACTGCTTAGTGATGCAAGCAAAAAGCCTAAGCGATAAACCCCCACTGATA///TGTAAAGTGACAGGGGCTCCTGTCCTGTAAAATGGAATTTAAGTCCTTGGTCCTTGTGTC///AATTCATCCTACAGAAGTAACCATAAAACTCAAGAGGGGTAGGTGAACAGGCGCCAGAAC///CTGCAGCAAAGTTTATTTCTCCATAGCTGCAATTAGGAAACAAATACTTAGGTAGATTGA
A_73_105266	0.0155841	0.00028549	up	2.51878	2.51878	1.33273			CGCACCCTTTAGTTAATTTAAGAAAGAGAGACTTCTCATATTGCCATATGGGGGGAGATT
A_73_113726	0.0161901	0.00044638	up	2.5187	2.5187	1.33268		Rep: Glycolate oxidase subunit GlcE - Pseudomonas aeruginosa 2192, partial (5%) [TC451272]	AGCAAGGTGAGTTCACTGGAGGAGGTGTGAGCTTGCCGAGTGAACACCGGCTGAGTTTGT
A_73_P148206,A_73_P087376,A_73_120667|527520	0.0178544	0.000941417	up	2.51661	2.51661	1.33148	HERC6	Bos taurus hect domain and RLD 6 (HERC6), mRNA [NM_001192644]	CCTGAATATTCTACAATGAAAAAAGTGAAGGAAGCACTTCAAAGAGCCATCAACAGCAAC///AAGCACTTCAAAGAGCCATCAACAGCAACAAAGGATTTATCTCAGCCACAGTCACAGGGA///TTTCTGCTAAGGACCTTGCGGATGTTCAAGTCAAACATATTTTTGCTGGAACATATGCCA
A_73_115618|518699	0.0443883	0.0108346	up	2.514	2.514	1.32998	SMPDL3B	Bos taurus sphingomyelin phosphodiesterase acid like 3B (SMPDL3B), mRNA [NM_001100379]	TATCCAAAACACTCTGCTCGTCATGCATGTTATTAATTTATAAATCATGTTTATAAAAGT
A_73_107660|281061	0.0288177	0.00451612	up	2.51153	2.51153	1.32857	CDK1	Bos taurus cyclin dependent kinase 1 (CDK1), mRNA [NM_174016]	TGTGTTGTGTCAAGAGCAGATAATTGTACTTTTACTGTTCATCTCTGGTTTTGTCTTGTA
A_73_P036237,A_73_P085581|508043	0.0259596	0.00353886	up	2.51127	2.51127	1.32842	PTTG1	Bos taurus pituitary tumor-transforming 1 (PTTG1), mRNA [NM_001034310]	TGTAAAAGGCACTGTCTTTGCAATTCTCTGAACATTCAACAATGGTGGGAGGAGGGCACT///ACTCTGGATGTTGAATTGCCACCTGTTTGCTGTGACTTAGATATTTAAATTTCTTAGCAC
A_73_101042	0.01858	0.00111136	up	2.50616	2.50616	1.32548			TTTGATGTATGTTTGCTCAACTATGCAGCTTCTTTAGAAAACTGTAAATTACTGGTTGGG
A_73_115530	0.0491162	0.0129677	up	2.50571	2.50571	1.32522		Rep: Sprouty-related, EVH1 domain-containing protein 3 - Homo sapiens (Human), partial (31%) [TC479093]	AACCTGACCCTACCTGTATACAGTTACTCCCAGATCTTAAATCATAGGACCTGGAATCAC
A_73_P038881,A_73_P262171|286767	0.015973	0.000369774	up	2.50511	2.50511	1.32487	PTHLH	Bos taurus parathyroid hormone like hormone (PTHLH), mRNA [NM_174753]	CATTGAATTTTTCAGCAGAGACCTTCAGAAGACGTATTGCAGGATTCTGTAATAATGAAC///AAATACCTGACTCAGGAAACTAACAAGGTGGAGACATACAAAGAGCAGCCACTGAAGACG
A_73_P169862	0.0253394	0.00332241	up	2.50505	2.50505	1.32484			CCATGAGCATGAAGTCTGTTTAAATTTCTTTCATTGGTGTCTGATAGTTTTTAGTGTTGG
A_73_P106036,A_73_P080001|516077	0.025577	0.00341232	up	2.49464	2.49464	1.31883	BNIP2	Rep: BCL2/adenovirus E1B 19 kDa protein-interacting protein 2. - Canis familiaris, partial (84%) [TC405401]///Bos taurus BCL2 interacting protein 2 (BNIP2), mRNA [NM_001040534]	CCATCCCTCTTGGTTTATAGAAACCTTCTGGGTGTAAAAAACCATTATAAGGAAATTTTC///GACTGTTCACTGCTGTATTGGTTTGCAGATCTCTTGAATTTAGTTCTTTACTAGCTAATT
A_73_P103706,A_73_P232472,A_73_119214|540737	0.0207554	0.0018132	up	2.49268	2.49268	1.3177	PCLAF	Bos taurus PCNA clamp associated factor (PCLAF), mRNA [NM_001015678]	TTTGCCACCTGATCACACAGATGATGAAAAAGAATAGAACTTTCTTATTCACCCTTGAAA///GGCAAAAAGGAATTGGAGAATTCTTCACTTCTGTCCCCTAAAGATTCAGAAAAAGAGAAT///AAAGTAATGTTAATTAAACTGAACCTATACCCTTTTTAAGAAAGGGGGCCAAAGAGGCAA
A_73_119770	0.0266072	0.00377513	up	2.49199	2.49199	1.3173		Rep: Erythrocyte membrane protein band 4.1 like 4B - Homo sapiens (Human), partial (22%) [TC456631]	GTCTGTGTTTATTGTATTGCCGTGTACCTTATGTTTCTTTGTTATTTAATGAATGGGACC
A_73_P052701	0.017321	0.000809469	up	2.49123	2.49123	1.31686		LB0044.CR_D12 GC_BGC-04 Bos taurus cDNA clone IMAGE:30957683, mRNA sequence [DT829342]	GAAACCAAGAAAGAAGATGTTAAAGACTACAACAACGAAACTGCTGAAAATGGAGGGGCC
A_73_P040626,A_73_P370326,A_73_119769|511422	0.023598	0.00271203	up	2.4906	2.4906	1.31649	COL6A1	Bos taurus collagen type VI alpha 1 chain (COL6A1), mRNA [NM_001143865]	TGCAGAACTACACCGTGCTGGCCAACACCGTGGACTCCATGGACTTCTTCAATGACGCCA///GTGTTTTTTCTCAACCGTGTTCATGTGGGCGACTTTTCCAAATAAAGGTTTTCACTCTCC///CTCATCCCAGTCGGAGCCCTGGCACCTGGTTCTCTGTCCTTTCTGGGGTCAGCTGTCACT
A_73_P078471|508424	0.0167188	0.000711193	up	2.49026	2.49026	1.3163	PIM2	Bos taurus Pim-2 proto-oncogene, serine/threonine kinase (PIM2), mRNA [NM_001206378]	CCCTGCCTGGATTATTTAAAAAGCCATGCGTGGAAACCCACTATTTAATAAACGTAATAG
A_73_101924|509963	0.0381423	0.00811115	up	2.48913	2.48913	1.31564	ANGPTL4	Bos taurus angiopoietin like 4 (ANGPTL4), mRNA [NM_001046043]	GTGCTGTGAGTCAGCTGGCGCCCACGGCGTCTGGGTGGAACCCACAGAATTCTCGGAATA
A_73_117177,A_73_P082991,A_73_P269401|508167	0.0176142	0.000889184	up	2.48616	2.48616	1.31392	RRM2	Bos taurus ribonucleotide reductase regulatory subunit M2 (RRM2), transcript variant 1, mRNA [NM_001244181]	ACCACAAGGCTGTAGGAAGACATCAGACTCACTGCTTCTGAGCAGATTTTAAAGTTTACT///AATACGGATATTGAGTACTGCACAAGTGTTCAGTGATTTCAATAAAACTGTTCTTGTGTC///TGAATTGCACTTTGATGAAGCAGTACATTGAGTTCGTGGCAGATAGACTTATGCTGGAGC
A_73_118377	0.0355417	0.00704132	up	2.48382	2.48382	1.31256		HW_Fat_55_050811_G08 Bos taurus CF-24-HW fat cDNA library Bos taurus cDNA, mRNA sequence [DV780751]	GTTTTACTCTGGTCTGTAAGTTATTCAAAATTACCTTTTCATATCTGTGGCCTTGAGTTC
A_73_P267546,A_73_108225|514221	0.027325	0.0040215	up	2.48044	2.48044	1.3106	COQ10B	Bos taurus coenzyme Q10B (COQ10B), mRNA [NM_001075654]	TGATATGTCTGCAGCACCATGCATCCTTATTTTCTATTTATTGTGTGTATTCACTTTCGA///ACTGCCTTTGAAAGAAGAGCGTGTAAGCTGTATGGTCCAGAAACAAACATACCTCGGGAA
A_73_102379|515639	0.014751	3.4123e-05	up	2.47869	2.47869	1.30958	RASSF8	Bos taurus Ras association domain family member 8 (RASSF8), mRNA [NM_001024549]	GCTGTAATGCCAAGCCTTCATTTTTATTTGTAGCATTTTGAGAGCATTAGGAAAGTGTTA
A_73_P368986,A_73_P384926,A_73_113109,A_73_P362991|505791	0.0176082	0.000877994	up	2.47701	2.47701	1.3086	TROAP	Bos taurus trophinin associated protein (TROAP), mRNA [NM_001024477]	TTTGATCCCTGATCCTTTTTTCTCCTTTTTAGTTGTAGTCGTCATGACCACCCTCCAAGC///TAAAAGAAACCCGAGATAAAACCCACACCAGGGACGGCTGTGACTCCTGCCTGATGCCCT///CCCTGTCCTGTCTTGCTCCTTCCTTTTAACCTTATTTATTTTCCACACCGTGGATTGGAA///TAGAACTCTGAATGCCCCTGAAAAAATACCGGGGGCTTTTCACCTTTCTGGACTGTTACA
A_73_P047166,A_73_P053041,A_73_P056201|788454	0.0208339	0.00186381	up	2.47507	2.47507	1.30747	MGC133764	Bos taurus melanoma antigen family B-like (MGC133764), mRNA [NM_001080372]	CCTGTGTTCCTGGTATGCATCAATAACTTGTTGACTTTATTTCCCCCAATTTTCAGTTAT///TATGATGGAAGAAGTCACTTCATCTTTGGAGAGCCCAGGAAGCTCATCACAGAAGATCTG///AATCAATAGAAGGTACAAGGAACAATACCCTGAGATCCTTAGAAGGGCCTCCGAGCACAT
A_73_P118496,A_73_P051221|507607	0.0159636	0.000328602	up	2.47411	2.47411	1.30691	CCDC28B	Bos taurus coiled-coil domain containing 28B (CCDC28B), mRNA [NM_001034305]	GATGGCTGACCGCAACCTGGACCAGCTGCTTAGCAATCTGGAAGATCTTAGTAATTCTAT///TGTCCCTTCTCATTTCCTTCAAACTGTGACTTTCTTACAGACTTGAGTGGGTGTTTCGCC
A_73_P080071,A_73_P080066|507781	0.0201342	0.00160991	up	2.47113	2.47113	1.30517	NEDD4	neural precursor cell expressed, developmentally down-regulated 4, E3 ubiquitin protein ligase [Source:HGNC Symbol;Acc:HGNC:7727] [ENSBTAT00000018331]	GATGCTTCTCAGATATTGGAGAAAATCATGTCAACGAATTAGAAGAACTAGTATGACAAC///GAAGGTAAAGTTGATAATTTAACCAGAGACAGCAACAGAGATTTCACAAAAGAACTACCT
A_73_112709|506759	0.0207538	0.00181148	up	2.47002	2.47002	1.30452	IFI16	PREDICTED: Bos taurus interferon, gamma-inducible protein 16, transcript variant 2 (IFI16), mRNA [XM_863928]	TATATGGAAACCTGCTCAGAGCTGTTCTTCTAAAAACCTGGATGTCATTAATATTGATGT
A_73_111006	0.0447796	0.0110203	up	2.46898	2.46898	1.30391		Rep: MGC83228 protein - Xenopus laevis (African clawed frog), partial (4%) [TC423454]	TCCTGTACAACTGTCTCCATTTTTCAAGTGTAAGATAAGGGCTAATGATGACATCTCATA
A_73_108344,A_73_P087796|515407	0.0156265	0.000294524	up	2.46409	2.46409	1.30106	MOB1B	Bos taurus MOB kinase activator 1B (MOB1B), mRNA [NM_001192412]	CTTGGTTGTTTTTATCTACTCTTGGAGGGCTTGTTTGGGTTCCTTTTTCTTTAATCTGAA///GATGGGGACCTATGCAAATTATTCCTCAAATCAAGCTGTGTGGAGTGTATTTGAATTTTG
A_73_105585|497204	0.0211742	0.00193795	up	2.46171	2.46171	1.29966	UBA7	Bos taurus ubiquitin like modifier activating enzyme 7 (UBA7), mRNA [NM_001012284]	GAGGAGGATGACACTAACTTTCCACGCTTGCACTACAAGCTGTGACAAGGCAGCAGCCCC
A_73_P255866,A_73_104065|534169	0.0219821	0.00216065	up	2.45827	2.45827	1.29764	SPATA6	Bos taurus spermatogenesis associated 6 (SPATA6), mRNA [NM_001046371]	AGCTTCTCTCAGGGAAAGGTTCCATTCTGATTGGTGTTCACCTTCCAACTGTGATGAGAT///TACACAGGAAAGCTTCTGAGATCAGCCGCGATAAACTGTATGAGTGTCCTTGTCAACTTC
A_73_108242	0.0230865	0.00251619	up	2.45662	2.45662	1.29668		Rep: MGC152581 protein - Bos taurus (Bovine), complete [TC405494]	AAATTTCTTACGGGGGAATTTTTTGTTCGTTTATTTTAGTAGCTGATGCTGGCACATCAT
A_73_P033246|539458	0.0162687	0.000572016	up	2.45646	2.45646	1.29658	FOXJ3	Rep: Forkhead box J3 - Bos taurus (Bovine), complete [TC392571]	CACAATTGTCTGGACTATCTTCCTGTTCCCTCCATTTACTTGAATAAACCTCTGTTCTCT
A_73_P184887,A_73_P293654,A_73_P033736|618577	0.022336	0.00225715	up	2.45558	2.45558	1.29606	SYBU	syntabulin [Source:HGNC Symbol;Acc:HGNC:26011] [ENSBTAT00000065047]///Bos taurus syntabulin (SYBU), mRNA [NM_001076511]	ATGAAGACTGTACCAGAAAGAAATGCACAATTGGAATGGTTGGTGAGGGAAGCCTCCAGT///GAAATATTTTGTGGACATCAACATTCAGAACAAGAAGCTGGAGTCGCTCCTCCAGAGCAT///AATGGCTTGTGTGTTCCTAAACCTGGTAATTGATGAAACTGTATGTAAGGTTTACATTGT
A_73_120618	0.0201272	0.00159539	up	2.45556	2.45556	1.29605		Rep: LON peptidase N-terminal domain and RING finger protein 1 - Homo sapiens (Human), partial (90%) [TC475362]	ACTATGCTGTGACACGGTCTGTATTCATGCTGCCCTAGATACTTTTGTAATTATTTGTTG
A_73_P294821	0.019308	0.00129223	up	2.45478	2.45478	1.29559		Rep: WD repeat-containing protein 37 - Homo sapiens (Human), partial (9%) [TC404169]	TATTTTCTACACCTTGGGTTTGCATTTTTCCAAGTGGGTTCACTTCCTGGCGGCATCTGA
A_73_P148826,A_73_P420006|507323	0.0324479	0.00584935	up	2.45385	2.45385	1.29505	RIMKLA	ribosomal modification protein rimK like family member A [Source:HGNC Symbol;Acc:HGNC:28725] [ENSBTAT00000023262]	ATGGCTGTGCTTCAGCTCAGGGAGTTGCAGAGAGCGTCTATGCCATCAACAGCGGGTCTA///TTAGTCAACCGCCCACAGAGCATTCTAAACTGCATCAACAAATTCTGGACATTCCAGGAG
A_73_109654|618239	0.0396435	0.00878184	up	2.45313	2.45313	1.29463	MND1	Bos taurus meiotic nuclear divisions 1 (MND1), mRNA [NM_001038223]	CTTTGACTACATAGACTAAAACGTTCCATGTTGTTGATGGTGAAGGAGCTATGTGCTCGT
A_73_P138981	0.0180214	0.000967512	up	2.44945	2.44945	1.29246		BovGen_12269 normal cattle brain Bos taurus cDNA clone RZPDp1056D0214Q 5', mRNA sequence [CO883944]	TTTTCCCCCCAGCCCTGTTCAAATTAACACAGTCGATAATAAAGGAATGAGTATCGTTAC
A_73_111198|616226	0.0216582	0.00207614	up	2.449	2.449	1.29219	COMMD6	Bos taurus COMM domain containing 6 (COMMD6), mRNA [NM_001113312]	TCACGGACTTCACTTTCTGCAACAAAGCTGCTTAAGGATCGAATGATATTTATTGAATGA
A_73_P037131,A_73_P417811,A_73_108199|287016	0.0161901	0.000511786	up	2.44866	2.44866	1.29199	H2AFZ	Bos taurus H2A histone family, member Z (H2AFZ), mRNA [NM_174809]	TTGGTTTTGTACAGACATTATTTCCACTCTGGTGGATAAGCTCAATAAAGGTCATATCCC///AGCAGAAGTTATAGTAACAAACATTTGGTTTTGTACAGACATTATTTCCACTCTGGTGGA///TCTTCCCTTTAAATTACTGTTAATTCTGTCTGTAGATCACAAAGTTAAAAGGCCCAAGTG
A_73_P074971|100298704	0.0220254	0.00217103	up	2.44835	2.44835	1.29181	KDELC2	KDEL motif containing 2 [Source:HGNC Symbol;Acc:HGNC:28496] [ENSBTAT00000011476]	TCATCATCATCATAGTTTCTCTAAGAAGAAAACTTGGGGATCATAGTAGATAGGCTTGCC
A_73_P202072,A_73_P492573,A_73_P440681,A_73_P035391|511908	0.016629	0.000657953	up	2.44498	2.44498	1.28983	EHD1	Bos taurus EH-domain containing 1 (EHD1), mRNA [NM_001015578]	AAGAACCACGAGGACAAGATCCGTGTGGTGCTGAACAAGGCCGACCAGATTGAGACGCAG///AGCATAAGCATCATTGACACGCCGGGGATCCTGTCTGGAGAGAAGCAGCGCATCAGCAGA///ATGGTAAAGTCCAAGCTCCCCAACACTGTGCTGGGGAAAATCTGGAAGCTGGCCGACGTG///GGGGTGATACTCACATGTGAATGACGGAATTTTGTGCATAAGAACTATGGATATTTTTAA
A_73_108466	0.0188405	0.00115521	up	2.44465	2.44465	1.28963		Hw_FAT_19_050524_C11 Bos taurus CF-24-HW fat cDNA library Bos taurus cDNA, mRNA sequence [DV777378]	TCCTCTCGTCACCAGTTTCTCTGCTGCATGAATTTGTGTTTTGCTGTAAGACAGCATGAG
A_73_P206427	0.0317305	0.00556545	up	2.44435	2.44435	1.28945			TGAACTTCCTCTTCTGTTCCAAATTGCCCTCATGGGTGCGGCATGCCTGGGTGAACCTGG
A_73_105041|539879	0.0306232	0.00510963	up	2.44197	2.44197	1.28805	KLHL35	Bos taurus kelch like family member 35 (KLHL35), mRNA [NM_001192324]	CCTTATGAGCAAAATCTTCACCTACGACCCTGGCACAGATGTCTGGGGGGAGGCAGCTGT
A_73_106343	0.0154489	0.000136966	up	2.44172	2.44172	1.2879		Rep: Vav-like protein C9orf100 homolog - Bos taurus (Bovine), complete [TC396290]	TTTGTCTCAGCTATGCAATATGAGAAAAGGGATTTTTGTGCCCTTAAGGCTGGCATGACT
A_73_P059246|536656	0.0442484	0.0107531	up	2.43887	2.43887	1.28622	MCU	Bos taurus mitochondrial calcium uniporter (MCU), mRNA [NM_001206102]	AGACTGAGAGACCCATTACAAGTACATCTGCCCCTCCGACAAATTGGTGAAAAAGATTGA
A_73_P033201,A_73_P346251,A_73_104917|282356	0.0179094	0.000952643	up	2.43838	2.43838	1.28592	SLC2A1	Bos taurus solute carrier family 2 member 1 (SLC2A1), mRNA [NM_174602]	CTCCAGGATTTTAACAAAAGACTGTTGCTCAGATCTATTCAGACAAGCAATAGGTTTTAT///ATGCTGATCCTGGGTCGCTTCATCATCGGTGTGTACTGCGGCCTGACCACTGGTTTTGTG///TATCTGGACAAACCAACTTGTAAATATACCACCTTACTCCCTCTGTAACTTACCTAAGCA
A_73_116144|616227	0.0454349	0.0113181	up	2.4383	2.4383	1.28587	CAMK2N1	Bos taurus calcium/calmodulin dependent protein kinase II inhibitor 1 (CAMK2N1), mRNA [NM_001114520]	TGTTGCACCTTTAACCAGCACACAGGGCTATTTCTCCAATGTACAATAAAAGAACTGTTC
A_73_P065406	0.0178544	0.000940044	up	2.43778	2.43778	1.28557		Rep: Heparan sulfate glucosamine 3-O-sulfotransferase 3A1 - Homo sapiens (Human), partial (68%) [TC454025]	CCGCAAGTTCTACCAGATGACGGGCCACGACTTCGGCTGGGACGGATGAACTTATAATTT
A_73_P389491,A_73_P227087,A_73_P045446|515310	0.0152818	9.94138e-05	up	2.43738	2.43738	1.28533	DUSP6	Bos taurus dual specificity phosphatase 6 (DUSP6), mRNA [NM_001046195]	AATCTCTTTGAGAATGCAGGAGAGTTCAAATACAAGCAGATCCCCATCTCGGATCACTGG///ATTCACCCTAGAGGAACAAAACTGTCTGGGCAGCTTCATTCAGAGAGATTCATTGACACC///TCAATTTTGCATATAGAGGAGCCAAAGAGAGGTTTCAGCTCTGTATTTGTAGTATCAGTT
A_73_P209752,A_73_P038691,A_73_P086586,A_73_P238380|782274	0.0155841	0.000276197	up	2.43219	2.43219	1.28226	TNFRSF10D	Bos taurus tumor necrosis factor receptor superfamily, member 10d, decoy with truncated death domain (TNFRSF10D), mRNA [NM_001102327]	TAATGAGAACCTTCAAGAAAAGTGAAACTTGACGCCTTTGTTGCTTTCCGGTGGGTGCTT///TTGTGACCAAATTAAATATGCAATTTCCACATGTACACCCGTGGTGGATTCATGTTGATG///AGTGTCAGTGCAAACCTGGCACTTTCCGTGGAGAAGATGCACCTGAATTCTGTCAAAAAT///TTCAAGAAAAGTGAAACTTGACGCCTTTGTTGCTTTCCGGTGGGTGCTTAGTAGCTCAGT
A_73_109378	0.0482673	0.0126145	up	2.43038	2.43038	1.28118		Rep: Toll-like receptor 3 - Bos taurus (Bovine), complete [TC433095]	ATCTTTTACTAATGAACACACAGGTTACTGAGGCCTATGAAAACAGTTTTGAAATAGTCC
A_73_121435|509031	0.049419	0.0131041	up	2.42997	2.42997	1.28094	SLC4A9	Bos taurus solute carrier family 4, sodium bicarbonate cotransporter, member 9 (SLC4A9), mRNA [NM_001192206]	GGTTGCCAGGGAACTCTTCTCAGTTTGCGAAAGGGAAAAATGTCCCTCTTTCCAGAATAA
A_73_P064411|615119	0.026409	0.00370875	up	2.42984	2.42984	1.28086	CTIF	cap binding complex dependent translation initiation factor [Source:HGNC Symbol;Acc:HGNC:23925] [ENSBTAT00000025156]	TCAGCAGAACAAGATGGACAAGTTGATCGAGATTCTGAACAGCATGCGGAACAATAGCAC
A_73_P090546	0.0249695	0.00318707	up	2.42966	2.42966	1.28075		dual specificity tyrosine phosphorylation regulated kinase 2 [Source:HGNC Symbol;Acc:HGNC:3093] [ENSBTAT00000009545]	CAGATGACAGATGCCAATGGGAATATTCAGCAGAGGACAGTATTGCCAAAACTGGTTAGC
DCP_20_5	0.019192	0.00126418	up	2.42874	2.42874	1.28021		Unknown
A_73_P043661|787125	0.0230865	0.00251461	up	2.42842	2.42842	1.28002	CENPW	Bos taurus centromere protein W (CENPW), mRNA [NM_001111261]	CTGCAGCAAAGGTAATTCTAAAGAAGAGCAGAGGTTAGAAGTCAAAGAACACATATTTGA
A_73_P069586,A_73_P042111,A_73_109216,A_73_P261866,A_73_P069581|281576	0.0247576	0.00311625	up	2.42776	2.42776	1.27962	WARS	Bos taurus tryptophanyl-tRNA synthetase (WARS), mRNA [NM_174218]///tryptophanyl-tRNA synthetase [Source:HGNC Symbol;Acc:HGNC:12729] [ENSBTAT00000006139]	GTGTCCTTCATGTACCTGACCTTCTTCCTGGAGGATGATGACAAGCTGGAGCAGATCAGG///GGCTTTGCTAAACTTTAAATTCCAAGATCTCACAGCTTAAAAGCTGCCTTTAACGTTTCT///ATGGGTGAAACTTTCCAGTTTACTTACTAAACTCCAGGCCATGCATGTACTGTACTCCAG///TACAAGAACGTGGTGAAGATCCAGAAGCACGTCACCTTCAACCAAGTGAAAGGCATTTTC///TTATTGGCCCAGGTCTGTAAGTTCTGTGTTTCTCTCAGCGCTGTTTCTTCCCTTGAATGT
A_73_P053792	0.0335796	0.00629431	up	2.4273	2.4273	1.27936			TTTGGGAGGAGAAGTTCAGGAAATACCCAAGAATGTCCTTAAAGCAACTGAGCAGGCTGA
A_73_P073631|616679	0.0280617	0.00428691	up	2.42506	2.42506	1.27802	ARL5B	ADP ribosylation factor like GTPase 5B [Source:HGNC Symbol;Acc:HGNC:23052] [ENSBTAT00000061579]	TCAATTAAGGATCATCCATGGCACATTCAGTCCTGCTGTGCTTTAACAGGAGAAGGGTTA
A_73_118886|784449	0.0231187	0.00254018	up	2.42455	2.42455	1.27772	KIAA1324	KIAA1324 [Source:HGNC Symbol;Acc:HGNC:29618] [ENSBTAT00000001511]	CAAACCTTCCTTTCTGCTTGCCTCAAACCTGCCAAATATACCCATACTTTGTTTATATAT
A_73_110078,A_73_P494718|789713	0.0196941	0.00140929	up	2.42246	2.42246	1.27647	RALGPS2	Bos taurus Ral GEF with PH domain and SH3 binding motif 2 (RALGPS2), mRNA [NM_001191426]	AACATCCTTAGAATAATTTCTGATTTACAGCAGTCCTGTGAATATGATATCCCCATGTTG///AGTAGGATGAATGCAATGCTGTGGTTCAAGCATTTGAGTGCAGCCTGCCAAAGCAACAAA
A_73_115338	0.0239085	0.00283732	up	2.421	2.421	1.2756		repulsive guidance molecule family member b [Source:HGNC Symbol;Acc:HGNC:26896] [ENSBTAT00000015746]	TCTTCAAAGCGCACCGGGAGTGTACGGATCAGAAAGTGTACCAAGCCGTGACTGATGACC
A_73_101054,A_73_P377061,A_73_P440986|512531	0.0193069	0.00128996	up	2.42066	2.42066	1.2754	MARS	Bos taurus methionyl-tRNA synthetase (MARS), mRNA [NM_001038091]	ACTTATCATAGAAAGTCACTTTAATGGATATGGACAATAATAAATAAATGTACAATCTAA///TGTGACAAGTGTGGCAAGCTCATTAATGCCATTGAGCTCAAGAAGCCTCAGTGTAAAGTC///ATGTTTGTGTCCAAGTTTTTTGGGGGTTTTGTGCCTGAGATGGTGCTCACCTCTGATGAT
A_73_P045141|767988	0.02068	0.00180105	up	2.41531	2.41531	1.27221	RIIAD1	Bos taurus regulatory subunit of type II PKA R-subunit (RIIa) domain containing 1 (RIIAD1), mRNA [NM_001077049]	TTAATTAGCAAAATCACGATGCTCAGCTGTTGAGAGAGACCAGAAAGAATCCAGCCTTTG
A_73_111853|533462	0.026917	0.00386826	up	2.41433	2.41433	1.27162	SAP30L	Bos taurus SAP30-like (SAP30L), mRNA [NM_001191372]	ACAGCTTGAGTGATGATGAAGCACACCTTCAAGGAATGAAGTATAATATTAATGCACAGG
A_73_111842|282355	0.0176142	0.000890291	up	2.41326	2.41326	1.27099	SLC1A5	Bos taurus solute carrier family 1 member 5 (SLC1A5), mRNA [NM_174601]	ACTCATAACACGTTGTTGTTACTCTGAGGATGTTTATAACAATAAAACTGTCAGTTTGTA
A_73_102233,A_73_P296316,A_73_P397896|281962	0.0213221	0.00198926	up	2.41151	2.41151	1.26994	OVGP1	Bos taurus oviductal glycoprotein 1 (OVGP1), mRNA [NM_001080216]	ATTCATGCATCATTCTGGGGGCAAACAGGCCCCAGGTCATAATGAGTTAATCTCTTCTCT///TTATGACTTACATGGAAGCTGGGAAAAGGTCACAGGACACAATAGCCCTCTGTTCTCTCT///TCACCAAAATTTTGGTTCTCAACTGCTGTGAATTCTTCAAGAATTGGCCCTGAAATGCCA
A_73_P054881	0.0450737	0.0111546	up	2.40661	2.40661	1.267		PREDICTED: Bos taurus ABCC4 protein-like (LOC527057), partial mRNA [XM_605444]	AAGAATTTTTTATCACTTGATGAAATACCACAGCTCAACACTCAGCTGCCATCAGATGGT
A_73_P353166,A_73_P077046,A_73_106507,A_73_P167992|519724	0.02025	0.00165838	up	2.40634	2.40634	1.26684	CAB39L	calcium binding protein 39 like [Source:HGNC Symbol;Acc:HGNC:20290] [ENSBTAT00000037908]///Rep: Calcium binding protein 39-like - Homo sapiens (Human), partial (38%) [TC424457]	CAAAACACAGCCTATTGTGGAGATTCTTCTGAAAACCAACCCAAACTCATCGAGTTTCTG///AGCAGTTCACCGATGAGAAGAACTACCTGATTAAACAGATTCGTGACCTGAAGAAGGTGG///TTATTAACGTGAGAAAGAGGGAGCCAAAAACTCACGGTTAAAGTACGTTTGCATAAAAGT///TGTAAATTATTAACGTGAGAAAGAGGGAGCCAAAAACTCACGGTTAAAGTACGTTTGCAT
A_73_P038566,A_73_P351456|616965	0.0172967	0.000797924	up	2.4055	2.4055	1.26634	FAM72A	Bos taurus family with sequence similarity 72 member A (FAM72A), mRNA [NM_001101263]	CAACCAAAGGCATTTTGTCAGTAGTGATACCGAAACAGACCAAGTTATGATTTTGTAAAT///GGTTATCACATGTTATATTGGCGATAACTATGTTAATATGGAGCAAAACTGTGAATCAGC
A_73_P096901|510392	0.0243026	0.00297101	up	2.40216	2.40216	1.26433	SLC25A36		TGTATGGCCCTTGTGAAGATACTTGCTGTAAGTCTATAATATTAAAGACTTTTGCTCATG
A_73_104613,A_73_P381176|508271	0.0251427	0.00327217	up	2.40197	2.40197	1.26422	DSN1	Bos taurus DSN1 homolog, MIS12 kinetochore complex component (DSN1), mRNA [NM_001100323]	GAAGTGAACAGTAGCGTGGAGTTATACCTCAGTGTTAACAGCCAATAAAACAGCAACTAA///ATAAATCGTCTGCCTCCCTGAAGAGGACTGAACGTGTTTCAAAGGAACGAATTCACCTTG
A_73_P152421	0.0236994	0.00278366	up	2.40092	2.40092	1.26359		Rep: Os05g0314100 protein - Oryza sativa subsp. japonica (Rice), partial (11%) [TC426214]	TAAGAAGTTTTGGCATTTGCGGCCTTTTTCACAAGTGGCCTGAGTGAGTGGGTTATATTG
A_73_120138	0.0164245	0.000599718	up	2.3999	2.3999	1.26297			TTGGTATCCTTCCTCCAGAGTGTAAGCACAATGAAGACAGGGATTTTGTATTTTTTAATC
A_73_103645|534176	0.0164493	0.000604126	up	2.39928	2.39928	1.2626	MNAT1	Bos taurus MNAT1, CDK activating kinase assembly factor (MNAT1), mRNA [NM_001105409]	CCGTAAGCCTCATCTGATGGAAGATATGAATAATTCACCTATGTGAGTTTGAGGTTGACA
A_73_113373,A_73_P113296|326334	0.0261014	0.00358619	up	2.3988	2.3988	1.26231	CA11	Bos taurus carbonic anhydrase 11 (CA11), mRNA [NM_175717]	CCTGCCTTTCCCAAGCCTCCCCACAAGGGGAGGGGAGTTACCCCCAAAACAAAGCTATTA///TGTCAATGTGGCTGGTAGCTCAAACCCGTTCCTCAGCCGCCTCCTTAACCGTGACACCAT
A_73_113998|540874	0.0196051	0.00137255	up	2.3968	2.3968	1.26111	DEPDC1B	PREDICTED: Bos taurus DEP domain containing 1B (DEPDC1B), transcript variant X1, mRNA [XM_005221501]	CACTAAAAAACCCCTTCCAACCATTTCAAAGAACTAGAAGTTTTCGGATGTAATACTTGG
A_73_106426	0.045139	0.0111849	up	2.3949	2.3949	1.25997		1243236 MARC 7BOV Bos taurus cDNA 5', mRNA sequence [DN288658]	AGCAGAATAAGGCAAAAGGGATAGTGTTCCAGTGCATCTGCAAAGGTAAAGTGTGCCAAG
DCP_1_2	0.0369492	0.00759512	up	2.3945	2.3945	1.25972		Unknown
A_73_P358531,A_73_P122071,A_73_102856|281360	0.018307	0.00101977	up	2.39099	2.39099	1.25761	DHRS4	Bos taurus dehydrogenase/reductase (SDR family) member 4 (DHRS4), mRNA [NM_174822]///Hw_liver_26_050721_B03 Bos taurus CF-24-HW liver cDNA library Bos taurus cDNA, mRNA sequence [DV788697]	AGACAGGAGAGCATAAAAGCTACCTTTCAGATCAAAAGGATAGGCAAGCCAGAGGAGTGT///GCCCATATATGTGGACGTCCTTAAGTTTAGAGCATCAAGTTTTTTATATAATTTGGGTCT///GAGATGGGACAGAAGGAACTTGGAGTGGAAGGAACTGAGTTGGAAATTAACAACTTGCAA
A_73_P376666,A_73_P423661,A_73_P061711|532126	0.0445907	0.0109517	up	2.38981	2.38981	1.25689	ANO1	Bos taurus anoctamin 1 (ANO1), mRNA [NM_001192717]	TATCATCTTCATGATCGCCGTGACCTTTGCCATTGTCCTTGGCGTCATCATCTACAGAAT///TCCAGAACAACCTGTTTGAGATCGGCATCCCGAAAATGAAGAAGTTCATCCGCTATCTGA///GTTGTTTTTGCACAAAACCATTATGCAGGGAATCCTGTTTAGTGTTCAGCGTTAATCAAA
A_73_115267,A_73_P257516,A_73_P060356|614509	0.0161901	0.000407865	up	2.38659	2.38659	1.25495	MXI1	Bos taurus MAX interactor 1, dimerization protein (MXI1), mRNA [NM_001076331]	TGCTGATTTTAATGGGTTAATTTCAGTCCTGTAGTTTTATTTTGTTTAGATAGGGCTGGG///AACGAATACGAATGGACAGCATTGGATCAACTATTTCTTCAGATCGTTCTGATTCAGAGC///AGCCTAGGACAGCTTATCATGAAGCCTGTGGATGATCAATTCTTTATAAAAAGGAAAAAA
A_73_P265621,A_73_P035551|282446	0.0246289	0.00307182	up	2.38635	2.38635	1.25481	IDH3A	Bos taurus isocitrate dehydrogenase 3 (NAD(+)) alpha (IDH3A), mRNA [NM_174644]	AGGCCTGCTTTCAAAGGACTTCTTCCAAGTGCTTGTTTTATTTATTAAACGTCTATCTGG///AACTAAATGGGCACAAGAGAAATTTCCTGGGAAAGTTTACATCAAAAACAGTGAATATGG
A_73_P103046,A_73_P167587|618238	0.0185285	0.00110236	up	2.38564	2.38564	1.25438	M-SAA3.2	Bos taurus mammary serum amyloid A3.2 (M-SAA3.2), mRNA [NM_001242573]///CR850558 Normalized and Subtracted bovine endometrium tissues (bcbp) Bos taurus cDNA clone bcbp0005.d.02 5', mRNA sequence [CR850558]	AGAGAGTTCTCTGTCCTCAGAAGGAAGCAGATCTAATAAATGCTTAAGAGATGGAAAAAA///TTTCCAGTAACGCAGAGAACTATTCAGGGATCACAGACCCTCTGTTTAAGGTATGACCAG
A_73_P030756|512233	0.0161901	0.000419236	up	2.38397	2.38397	1.25337	HIPK1	Bos taurus homeodomain interacting protein kinase 1 (HIPK1), mRNA [NM_001109998]	GGAAGAGAGATCATTCTGAAGTTACCTTTGAAAAATATTTTCCCTCTCTGACTTGATTTC
A_73_P467348,A_73_118396,A_73_P337116|511649	0.0155841	0.000222544	up	2.38236	2.38236	1.25239	LMAN1	Bos taurus lectin, mannose binding 1 (LMAN1), mRNA [NM_001098943]	TAAAAAGCCAAAGAGGATCAGTGTGGACAAAGACAAAAGCAGCCTTTGAGAACTGGGAAC///CTCAGCAAGAAGCAGCTGCCAAAAAATTCTTTTGACCACCATTTTCATGTGTACATCATG///TTCGAAGGACAGAATCGTATTCACCTTGAAATCAGCAGCTGAACCGACAGTTAGATATGA
A_73_111419,A_73_P381056|529336	0.0276699	0.00414491	up	2.38101	2.38101	1.25157	TNFAIP8	Bos taurus TNF alpha induced protein 8 (TNFAIP8), mRNA [NM_001083711]	AGCATGTGAGTTGAAGTTGTGACTGCTCATGATTTATTTGAAGACGGAGCTCTGCTGATT///GAAGGGAAGAACGAATCTTGCTACAAGAACATGAGAATGAATGCATTTCAATGTTTAGTA
A_73_P075346	0.0169822	0.000735553	up	2.37779	2.37779	1.24962		Rep: Rab6-interacting protein 1 (Rab6IP1). - Canis familiaris, partial (21%) [TC486984]	CGCACACATGTATGAGGATGTGGCACTGATCAAAGACCACACACTTGTCAATTCCTTGAT
A_73_P190802|786883	0.0284936	0.00440477	up	2.37697	2.37697	1.24913	ULBP15	Bos taurus UL16-binding protein 15 (ULBP15), mRNA [NM_001168611]	AAGTGGGATAATGACAGAGCTGTGACAGAGTTCTTCAAGAATGTCTCCATGGCAGACTGT
A_73_P033161,A_73_100158|528735	0.01858	0.00111255	up	2.37637	2.37637	1.24876	S100A1	Bos taurus S100 calcium binding protein A1 (S100A1), mRNA [NM_001099042]	GCGCAAGAATAGTGGGCCAGGCCTGCAACTCCTCTTTCATTAAAGGCTTCTGTCTCACCA///CAAGAATAGTGGGCCAGGCCTGCAACTCCTCTTTCATTAAAGGCTTCTGTCTCCCCAGCC
A_73_P148976	0.0297383	0.0048275	up	2.37616	2.37616	1.24863		GB	CGTCCTAACTATGCTGAATTTCTTTGTCACTGAATGTAAGTATTTCTTTAGTGCTTCTCT
A_73_P102521,A_73_P356916,A_73_103367|326577	0.0161901	0.000508536	up	2.37464	2.37464	1.24771	SLC1A4	Bos taurus solute carrier family 1 member 4 (SLC1A4), mRNA [NM_001081577]	AAGTGCATTGAAGAAAACAATGGTGTAGACAAGAGGATCAGCCGGTTCATTCTCCCCATC///TTGGGCCATTTTATTCACGGAGGAATTGTTCTGCCACTTATTTATTTTGTCTTCACGAAA///GCTGTTCATCTCTTTTCAATATGTGACACTTGCCTTAAAACATAGCAGTCTTCAAAATGA
A_73_P259906,A_73_106000,A_73_P352441,A_73_P309396|507157	0.0110645	7.11493e-06	up	2.37427	2.37427	1.24748	TMEM59L	Bos taurus transmembrane protein 59 like (TMEM59L), mRNA [NM_001075301]	TAAGTTCCAGCCCCTGACTCTGGAGCAGCACAAGGGTTATATGGTGGAGCCAGAGTGGTC///CCAAGAGAAGGGGCGGTGGGTAGCTCCATGCTGGGAGGGTGAATGAGGCTGGTGTTGCAA///GCAATGACCTTGTCAACTCGGCTCAGGGCTTCGTCTCCTCTACCTGGACATACTACCTGC///ACTACCTGCAGACTGACAATGGGAAGGTGGTGGTGTTCCAGACCCAGCCTGTGGTAGAGA
A_73_121098,A_73_113467|541070	0.0365447	0.00740989	up	2.37112	2.37112	1.24557	MYLIP	Bos taurus myosin regulatory light chain interacting protein (MYLIP), mRNA [NM_001102253]	CTTTCCATATTGCCTTAATGTAGCAGTAATGTGTTTATGCATTTGTTTCTTTGCACAGAC///TCAACCTGGGCAAGAAGTATGTCTTCGATATTAAAAGAACCTCCAAGGAGGCGTATGACC
A_73_P069381|539998	0.0365447	0.00740734	up	2.36935	2.36935	1.24449	FBXO33	F-box protein 33 [Source:HGNC Symbol;Acc:HGNC:19833] [ENSBTAT00000008982]	TTTCCAGTAGTGTGAAATCCCTAGCAACAAGTCACTGGATTTTTCTCTGTCAGCACGCGT
A_73_105161,A_73_P286741,A_73_P398906,A_73_P089556,A_73_P441781,A_73_P433506|509106	0.015973	0.00033539	up	2.36905	2.36905	1.24431	EZH2	Bos taurus enhancer of zeste 2 polycomb repressive complex 2 subunit (EZH2), mRNA [NM_001193024]	TCTCACCAGCTGCAAAGTGTTTTGTACCAGTGAATTTTTGCAATAATGCAGTGTGGTACT///GATTTTTGCTAAGCGAGCCATCCAGACTGGTGAAGAGCTGTTTTTCGATTACAGATACAG///AGAGAATGTGGGTTTATAAATGATGAAATTTTTGTGGAGCTGGTGAATGCTCTTGGTCAG///TACTGTGGGCGATTTAGAAAAGGAAAATGCAGTTTGAAATTCTGAATTTGCAAAGTACTG///TTTGTGAAAAATTTTGTCAGTGTAGTTCAGAGTGTCAGAACCGCTTTCCTGGCTGCCGCT///CTGCAAAGTGTTTTGTACCAGTGAATTTTTGCAATAATGCAGTGTGGTACATTTTTCAAC
A_73_P068136|504258	0.023533	0.00268945	up	2.36709	2.36709	1.24311	SIGLEC10	Bos taurus sialic acid binding Ig like lectin 10 (SIGLEC10), mRNA [NM_001206277]	AGCAATTGGGATGAGAACAGAGTGTGGTCTGTCTCTCTCTCTTTTTAATCCTCCGAGGAT
A_73_101099	0.018989	0.0012097	up	2.36636	2.36636	1.24267		PREDICTED: Bos taurus inositol 1,4,5-trisphosphate receptor interacting protein-like 1, transcript variant 2 (ITPRIPL1), mRNA [XM_587136]	TGAAAGCTCTGCCCTGTTCCTCGCTGGCCGGGGCACGTTGACTTGTATTCAGGCCATTAA
A_73_108609,A_73_P147861|540500	0.0215843	0.00205479	up	2.36632	2.36632	1.24264	GALNT14	Bos taurus polypeptide N-acetylgalactosaminyltransferase 14 (GALNT14), mRNA [NM_001192732]	GACACCTTCAACTACATTGAGTCAGCCTCAGAGCTCAGAAGGGGGGTTTGACTGGAGCCT///CAGGACTCCAGTGAAAGATGAAGAGTGGAGGTTGTTTTCAAAACAAATAAAGAACCTTAA
A_73_P040711,A_73_P354446,A_73_P470093|767832	0.0173221	0.000818946	up	2.36299	2.36299	1.24061	GOLGA7B	Bos taurus golgin A7 family member B (GOLGA7B), mRNA [NM_001076954]	TGGGCGCTGGCCGTGCGGTGGCCTTTCATCTTATTATTTCTTTTTCCAATAAAAGGACTT///ACACACGTGTGCATACAGGTGTGTGAATGCACTTGTATGTTGCCCTTGGCTACTGGGCCG///TATACATTCTAACAAAAGCATTGGGGTTCTAGGAGAGTGGAGCCAACCTTCCATGGCCTT
DCP_20_3	0.0228028	0.00240764	up	2.36147	2.36147	1.23968		Unknown
A_73_114497|521742	0.0196059	0.00137552	up	2.35967	2.35967	1.23859	FOXN2	forkhead box N2 [Source:HGNC Symbol;Acc:HGNC:5281] [ENSBTAT00000020154]	TTAATTCTTTACAAGGGATATCAAAGCCATAATGGACTTCTTTTGGTTTAGGGTGGGGGA
A_73_P030851|515866	0.0283356	0.00436214	up	2.35966	2.35966	1.23858	GOLT1B	Bos taurus golgi transport 1B (GOLT1B), mRNA [NM_001046215]	GCAAAAATATTTCCAGTTGCACTGTGTCTCTGAAAATGATGCATGAGTTAGATTGGATTA
A_73_P297156,A_73_111167|510774	0.0297453	0.00483158	up	2.35831	2.35831	1.23775	ABHD1	Bos taurus abhydrolase domain containing 1 (ABHD1), mRNA [NM_001035094]	ACCTAGTTGATCAAGCTTTGAAGGATGGCTACAGGGCTGTTGTATTTAATAACCGGGGCT///CCCTTCAGAGGCAGGCAAGAGCTGACAAGAGTCTTAGTTCAGTCTTCCCTTGTTTATTAA
A_73_102114|534217	0.0155841	0.000231586	up	2.35823	2.35823	1.23771	AIFM2	Bos taurus apoptosis inducing factor, mitochondria associated 2 (AIFM2), mRNA [NM_001314031]	AAGAGCCGGGACCTGTTGGTCTCCACGAGCTGGAAAACCATGAAACAGTCTCCACCCTGA
A_73_P039856,A_73_P090311|515215	0.0176142	0.000896052	up	2.35764	2.35764	1.23735	DNAJC22	Bos taurus DnaJ heat shock protein family (Hsp40) member C22 (DNAJC22), mRNA [NM_001075701]	TATGAGTTTGTTCACAGTTTTCAGGATGAGAAGCGTCAGCTGGCTCTCCAGGTTTTTGGT///TAAGGTTTTTGGTCTCTCAGAGGGGGCAACAAATGAAGAAATACATGGCAGATACCGGGA
A_73_P104441|616707	0.0209769	0.00189411	up	2.3537	2.3537	1.23493	LOC616707	Rep: LOC616707 protein - Bos taurus (Bovine), partial (64%) [TC489036]	TTCTCAGCAGCCCTGGGTGTTCTCAGGAACTGTGAGGAGTAACATTTTATTTGGAAAAAA
A_73_P102976,A_73_118045,A_73_P059321|282573	0.0402531	0.00905766	up	2.35328	2.35328	1.23467	KCNMA1	Bos taurus potassium calcium-activated channel subfamily M alpha 1 (KCNMA1), mRNA [NM_174680]	TGTGTCTATCTGCTCATGGTGACCATGTCCACTGTTGGTTACGGGGATGTTTATGCAAAA///GCATGACCTAGCCACTGCTGGGGGTTTTCTTCTATAACATTGTCCTTGTGAAAACTTTTG///ATACAATATGCTTTGTTTTGGAATTTATCGGCTGAGAGATGCTCACCTCAGCACCCCCAG
A_73_118151	0.0166838	0.000694828	up	2.35305	2.35305	1.23453		Rep: Yarrowia lipolytica chromosome D of strain CLIB122 of Yarrowia lipolytica - Yarrowia lipolytica (Candida lipolytica), partial (3%) [TC425768]	GCATTCCGTCGTGTGCCTTATTCTTGGAGAATCTGTATACGGCCTGCCTATAGAGATATA
A_73_116618	0.0330155	0.00605054	up	2.35079	2.35079	1.23315		Rep: UPF0259 membrane protein BU276 - Buchnera aphidicola subsp. Acyrthosiphon pisum (Acyrthosiphon pisumsymbiotic bacterium), partial (5%) [TC408902]	CTGAAGTCATTTGTGAGCTTGTATGACTTTTGTATTTAGCGATGTTGCATGCTCACATAC
A_73_P381131,A_73_P502773,A_73_P078076|515978	0.0173221	0.000832353	up	2.34985	2.34985	1.23257	SYTL4	Bos taurus synaptotagmin like 4 (SYTL4), mRNA [NM_001192433]	TATGGAAGAGGAAGAAGAAGAAGAAGACATTGACCACCTGGTGAAGTTGCATCGTCAGAA///TTGTCTACAATGGTGTGAGGCTGGAAGATCTCCAACACATGTTGCTGGAAATGACTGTGT///ATACATTTGTCTACAATGGTGTGAGGCTGGAAGATCTCCAACACATGTGCCTGGAACTGA
A_73_P252881,A_73_P252266,A_73_P033631|509107	0.021831	0.00212813	up	2.34925	2.34925	1.2322	ATF4	Bos taurus activating transcription factor 4 (ATF4), mRNA [NM_001034342]	TTTTGATATCCTGTTCAGTAAAGATGACCTGGAAACCATGCCAGATGAGCTCTTGGCCAC///TAAAAGAGGAGGATGCCCCCTCAAATAATGAAAGTGGCATCTGTATGAACCCTGACTCCT///GGGTAGTCAGGAGTATGTGCGCTTGTATATAGAAGGCTGAAGCTGTGTTTTAATAAATTA
A_73_110539,A_73_P042626|513727	0.049432	0.0131282	up	2.34825	2.34825	1.23158	OVOL1	Bos taurus ovo like transcriptional repressor 1 (OVOL1), mRNA [NM_001081521]	AGAGATAGGACTTCCTTCCCAGATGAGGTATGGGAAGGTGATTCTCTCATCCCTCGCCTC///AGTTGCAAAGCTCTGTGTTGTCTGTTTTATTTTATAACTTTCCCCTCAGCTAGCAAAATA
A_73_108232|616421	0.0261204	0.00360324	up	2.34615	2.34615	1.23029	FAM89A	Bos taurus family with sequence similarity 89 member A (FAM89A), mRNA [NM_001101257]	ATCAGCTGTAGTATGTTAGAAAGCAAACTCTTCCACTCAATACGGTGATCACCTGAAGCC
A_73_P511123|101903064	0.0206059	0.00175468	up	2.34522	2.34522	1.22972	LOC101903064	PREDICTED: Bos taurus COMM domain-containing protein 6 (LOC101903064), mRNA [XM_015467022]	CCGAAAATAATCTAAAATCATGGACTTCACTTTCTGCAACAAAGCTGCTTAAGGATCAAA
A_73_P368736,A_73_120486|515011	0.0344906	0.00662332	up	2.34463	2.34463	1.22936	ITGA2B	Bos taurus integrin subunit alpha 2b (ITGA2B), mRNA [NM_001014929]	TCAGACCTGCTCTACATCCTGGATATTCATCCACAGGGAGGCCTTCAGTGCGCCTCACAG///GCCCACACATCTCTGTCCTGCAGCAAGGCTGGGTGTGATGTTGTGTCCCTTCTCCAATGA
A_73_100890,A_73_115302|531476	0.0201908	0.00163023	up	2.34224	2.34224	1.22789	JDP2	Bos taurus Jun dimerization protein 2 (JDP2), mRNA [NM_001193245]	GACCGACAGCGTCAAGACACCTGAGTCAGAAGGCAACCCTCTGCTTGAGCAGCTTGAGAA///GGGAGGGGGTGGGGTGTGTTTCCATCCTGGTAAACCCTTCATAGTACTCAGTCCTGTATC
A_73_114327,A_73_P253136|509965	0.0162642	0.000552114	up	2.33964	2.33964	1.22629	CMPK1	Bos taurus cytidine/uridine monophosphate kinase 1 (CMPK1), mRNA [NM_001046044]	AAATCCGTAGCAGTGGAACCTTGAAATGCATGTACTTAGATTTATAAAAGTGATTCGGTT///ATTCCAAAGGAACTTTTTGTGTAGTCAGTTCTTGCACAATGTGTTTGGTAAACAAACTCA
A_73_P089811|534252	0.018354	0.00104973	up	2.33784	2.33784	1.22518	TBC1D15	TBC1 domain family member 15 [Source:HGNC Symbol;Acc:HGNC:25694] [ENSBTAT00000030419]	CATGATCATTCTTTGAAGAGACACTTTGTTACAACTCTTTTTCAAGTACTTGAAAGGTGG
A_73_119785	0.0244161	0.00299888	up	2.33677	2.33677	1.22452			GTGATGTTGCACAAAATGCAGAGAAACCAAGAAGGGGGAGGGTTAATGTATTAAATGTGC
A_73_P097711|100849865	0.0198755	0.00149795	up	2.33446	2.33446	1.22309	LOC100849865	Rep: Possible Fe ABC Transporter precursor - Rhodopseudomonas palustris, partial (7%) [TC415302]	ATCGCAGAGTTTGAGACAAGATAGCTGGCCCATTCCCTCTCTGCTTGTAATTAATGCTGA
DCP_1_1	0.0229632	0.00244904	up	2.33357	2.33357	1.22254		Unknown
A_73_P462686,A_73_100293,A_73_P255366|516303	0.0155841	0.000252278	up	2.33335	2.33335	1.2224	ERRFI1	Bos taurus ERBB receptor feedback inhibitor 1 (ERRFI1), mRNA [NM_001077930]	ACAGTCAGCTGTTGGGTTGAGAGTATCTGTGTGGAGATGTGTGTTGTGGGTTTCTTTTTT///GAAGGTTAAAACATGCTTTAGAAAAAGGCACTGATTTCTGCATCTTTGTGTACAGTATTG///TGAATAAACAAATACAACACAAGCTGGCCCTTGTGTTGCTGGGTCCCTCTTCAGTATTTC
A_73_110616|616779	0.023598	0.00271546	up	2.33258	2.33258	1.22193	RABIF	Bos taurus RAB interacting factor (RABIF), mRNA [NM_001040596]	TGCAGACTGCGAGGTGGGCCCCATCGGCTGGCACTGCCTGGATGACAAGGACAGTTTCTA
A_73_111209,A_73_P251601|618880	0.0170714	0.000763559	up	2.33245	2.33245	1.22185	VRK1	Bos taurus vaccinia related kinase 1 (VRK1), mRNA [NM_001038224]	TCATGTGAGTCTTGTGGAAGTGGGGGTAACAATGAAGTACCTATGTGTTTGAAAAGCAGA///ATATTCTTTTGCAAGGACTGAAAGCTATAGGAAGTAAGGATGATGGCAAGCTGGACCTCA
DCP_1_4	0.0396561	0.00879605	up	2.33035	2.33035	1.22054		Unknown
A_73_121113,A_73_P459601|614348	0.0314746	0.00544776	up	2.32825	2.32825	1.21924	RGCC	Bos taurus regulator of cell cycle (RGCC), mRNA [NM_001102276]	GTTAGAGACTGACTTGGGTTACCTGCTTGCAGCGTATTAGAGCAGATGACTCATGCTAAT///GAGAAGTTTCAGAAAGCTCAGAGGATCTGATGAAATCAGCTACAGAATATGCTGCTGGAG
A_73_108548,A_73_P376061,A_73_P405546|531369	0.0233	0.00260635	up	2.3281	2.3281	1.21916	TTF2	Bos taurus transcription termination factor 2 (TTF2), mRNA [NM_001080735]	TTGGCTTTCAGTTTCACCTTCAAGCCTGATGCCCTTCTCCAAGCGAGGATGAATTATCAT///TCAGAACAACTTGTTGGACATGTATTCACTGCTGAAATTTCTCCGTTGTTCTCCATTTGA///AGAAGAGGAAACTAAGCCTTTGCCTCCAATTGTTCACAGTCAACACTCAATAAGCCAGCC
A_73_P045216|522103	0.031718	0.00554779	up	2.3274	2.3274	1.21872	STK39	Bos taurus serine/threonine kinase 39 (STK39), mRNA [NM_001075826]	GGGCTGCCTTATTATTGAATGTTTGGATCTGAGGTATAACATGTTTTCCTATTGTTTTGA
A_73_P038191,A_73_P102971,A_73_P263901,A_73_104003|503621	0.0255066	0.00337247	up	2.32669	2.32669	1.21828	PDLIM5	Bos taurus PDZ and LIM domain 5 (PDLIM5), mRNA [NM_001077444]	GGGAGATAACATGCACGCTAAATATCTGACCAGAAATGCTTTCTATCTTGTAATATAATG///AATATGACTCTTCAAAGAGCATCTGCTACACCCAAGCTTGAGCCAGTTCCTGTTCAAAAG///CAAAATTACGTGACTGGCACCATGAAGTTTCAGCACGTGCTCTTAACGTACAGTGATTTC///TGGCCCTCAGGGGATAAATTCCAAGCTTTGAAAACCAAGTCTATGAGGAAATATTTGGCT
A_73_P116546,A_73_P101021|281600	0.0242444	0.00295281	up	2.32642	2.32642	1.21811	ADAM9	Bos taurus ADAM metallopeptidase domain 9 (ADAM9), mRNA [NM_001192818]///Rep: ADAM9 protein - Homo sapiens (Human), partial (25%) [TC471078]	GACTAATAATCATCATACATTAGAATTTTGTGTATCTCATTCATTACATGAATAAAGGAA///CAGTGTGAGAATGTACAACAATTGCCTGTATTTGGGGTTGTGCCAGCTATTATTCAAACG
A_73_P031766,A_73_P100651,A_73_114042|286852	0.0152818	0.000102737	up	2.32403	2.32403	1.21663	PPP3CA	Bos taurus protein phosphatase 3 catalytic subunit alpha (PPP3CA), mRNA [NM_174787]	ACAACATAAGATCACTAGCTTCGAGGAGGCCAAGGGCTTAGACCGAATTAATGAGAGGAT///AATTTCATGGATGTTTTCACCTGGTCCCTGCCGTTTGTTGGGGAAAAAGTGACTGAGATG///TGTTACTGGACACGAAAACTTTGTCTAATTTCTTACTCTATTGTACGTTTACAGTTGCAG
A_73_P382771,A_73_P030726,A_73_P290261,A_73_P336876|615657	0.0176142	0.000891804	up	2.32398	2.32398	1.2166	ATG4D	Bos taurus autophagy related 4D cysteine peptidase (ATG4D), mRNA [NM_001099146]	AAGTGGGCAGATGATGCTGACTCAGGGCCTTCTGCTTCATTTCCTGCCCAGAGACTGGAC///TTTTAATTTATGTCATGTTAGGTGTGGGAGCTTGAACTCCCCCCTGACAAGTGCAGCTGA///ATGCTGGAGACAGAAAGGAGTTTGAGACGCTCTGCTCAGAGCTGACCAGGGTCCTCAGCT///AGAAACTCTCAACCCCGTGTACGTGCCCTGCGTGAAGGAGCTTCTTCGTTCAGAGCTGTG
A_73_P137101	0.0198435	0.00146877	up	2.3233	2.3233	1.21617		Rep: Zgc:158847 - Danio rerio (Zebrafish) (Brachydanio rerio), partial (19%) [TC405804]	AACTCCTCCAGCTGTCAGAGCTTGTTATGAATAAACTTTGAAAAGGGAGATCATGTATCC
A_73_119160,A_73_P320376|505915	0.0161901	0.000433972	up	2.32141	2.32141	1.215	PPP2R5B	Bos taurus protein phosphatase 2 regulatory subunit B'beta (PPP2R5B), mRNA [NM_001075232]	ACAGTAACTGTGGTCTGTTCCCCTTTCCATGGCTGGGGGTAGATTTAATAAAGAGAGAAA///ATCTACAATGTGCTCAAGACCTTCATGGAGATGAATGGGAAGCTGTTTGATGAGCTCACG
A_73_P093561,A_73_P038681,A_73_P108469,A_73_103477|282368	0.0201272	0.00157779	up	2.32109	2.32109	1.2148	SLC6A9	Bos taurus solute carrier family 6 (neurotransmitter transporter, glycine), member 9 (SLC6A9), transcript variant 2, mRNA [NM_001242342]	TATCATGTGTGTGTCCATCATGTACATTTACGGGCACCAGAACTACTTCCAGGACATCCA///CGCACCACTAGGATTTTAAAGTCCATAGGTTTTAATGAAATTTCTATTCCTGTCTCTGTA///TAACCCTTGGAACACGCCCGACTGCATGAGTGTGCTGGATAACCCCAACATCACCAACGG///TCTGTAGCAATAATGGTGTGCCTCCCACCCCCGACCATCCGCGCACCACTAGGATTTTAA
A_73_P061811	0.0236438	0.00273754	up	2.3196	2.3196	1.21387		dystonin [Source:HGNC Symbol;Acc:HGNC:1090] [ENSBTAT00000061451]	CGGCCCTTCCTGAAGCCTTTACTATTTAAGTCTGAGAGATGTAACATATGATGTAGAGAT
A_73_P203702,A_73_111946,A_73_P087836|513376	0.0155841	0.000154953	up	2.3162	2.3162	1.21176	STBD1	PREDICTED: Bos taurus starch binding domain 1 (STBD1), mRNA [XM_591045]///starch binding domain 1 [Source:HGNC Symbol;Acc:HGNC:24854] [ENSBTAT00000013713]	TTTTGTCTTAATGATCAAAGGCTGGTGTAGAAACAGGGGCCTAATCAGAGTCTGTTACTG///TCTTAGACCAGGGGAGTAAAACAAGCCTTATTCAAAAAGGGCAGATTTCCTACTGGTGCA///GGAAGAATGCAGCAATAGATTCTTGGAGACTGGTCATGAGGATAAAGTGGTTCACAGGTG
A_73_102355|515610	0.0274433	0.00407023	up	2.31536	2.31536	1.21124	ACTA2	Bos taurus actin, alpha 2, smooth muscle, aorta (ACTA2), mRNA [NM_001034502]	ACTCCCTGCTCTCTTGTCTGTCTCTAGTACACACTGTGAATGTTCTGTGGAATAATGCCT
A_73_P068866,A_73_P436871|514186	0.0259651	0.00354559	up	2.31196	2.31196	1.20912	SYNM	Bos taurus synemin, intermediate filament protein (SYNM), mRNA [NM_001191453]	AAGTGCCTGGCATCTGTTTGAAAGTATAATTGCCTAGGTAAGACACCTAAATGGCAATGG///TACAGAAAGAAAATGAGAGAAATCTGTTTCCACGGCAAAAAGCACCTCCTGCGAGCTTCC
A_73_P032306,A_73_P064971|617294	0.0177559	0.000924883	up	2.31054	2.31054	1.20823	RPH3AL	Bos taurus rabphilin 3A like (without C2 domains) (RPH3AL), mRNA [NM_001035494]	TTTGGCAGAAAAACACTTAATTCAGGGTGCAGGCGATGCTTCTGGAAAACCCTTCCTGTA///TCTCCCAGCCAGAAACGGCCCCTGTGGTTGTGTAAGATCTGCAGTGAGCAGAGAGAGGTA
A_73_P064141,A_73_P167202|518030	0.0161901	0.000387524	up	2.31024	2.31024	1.20804	TAF4B	Bos taurus TATA-box binding protein associated factor 4b (TAF4B), mRNA [NM_001205844]	AGTAGGGGAGACCATTGTTTACAGTTATAAACTTTTACTAAGTCGTGCTTATATATCCCA///TGAGCACTGCAATACCTACCAGTCAGTTTTCTCAAGCTTCCATTCTAAAGCAAGTTACCC
A_73_101621	0.0271139	0.00392799	up	2.30386	2.30386	1.20406		Rep: Uncharacterized protein NEDD4 - Homo sapiens (Human), complete [TC402577]	GCAAAGTATCTCAAAACTCATTCTGCAGCTGGAAGTAAATAGGGTCATTTTCTTAAAGCA
A_73_P399596,A_73_P060826,A_73_P397591,A_73_P060851,A_73_P060831,A_73_110703,A_73_P154997|281474	0.0201908	0.00164172	up	2.30229	2.30229	1.20307	SAA3	Hw_loin_34_050705_F11 Bos taurus CF-24-HW loin cDNA library Bos taurus cDNA, mRNA sequence [DV793268]///Bos taurus serum amyloid A 3 (SAA3), mRNA [NM_181016]	TTGTAGTTGGCTTCTTTCATGTCTTGGTAAGCTCTCCACATGTCTTTAGCCCCTTGACCA///ACTGACCTAGAGAGTTCTCTGTCCTCAGAAGGCAGCAGATCTAATAAATGCTCAAGAGAT///TTGTCTGCACCCCTGTAGTTGGCTTCTTTCATGTCTTGGTAAGCTCTCCACATGTCTTTA///TAAGTAACGCCAGAGAGACTATTCAGGGAATCACAGACCCTCTGTTTAAGGGTATGACCA///TGATCAGTAACGCCAGAGAGACTATTCAGGGAATCACAGACCCTCTGTTTAAGGGTATGA///GGCTGTGAGTCCCTAAGGGCAGAGACACTGACCTAGAGAGTTCTCTGTCCTCAGAAGGCA///CCCCAAGATCGAACCCGGCCA…
A_73_121425,A_73_P265926,A_73_P257896|540852	0.0227095	0.00238464	up	2.30153	2.30153	1.20259	SAMD4A	Bos taurus sterile alpha motif domain containing 4A (SAMD4A), mRNA [NM_001206853]	CTGGTCCCTCTCCCATTTTGATTTTGTGAGAGCGTAGGTCGTCCTTGTAAACATATCAGT///AGAAGCTCAAAGAGAGACAAAATCTCCTGAAGTCTTTGGAAAGGGACATCATTGAGGGGG///AAAGATTGTTGTCATGGAAACAGCAGGTGCAGAAGCTCTTTCGGTCTTTCCCTCGGAAAA
A_73_104024,A_73_P079076,A_73_P114456|517186	0.029544	0.00472915	up	2.29996	2.29996	1.20161	CARMIL3	Bos taurus capping protein regulator and myosin 1 linker 3 (CARMIL3), mRNA [NM_001192464]	AGATCTCCTCTCCTGGGAGGGCAGATCTGTCTCTCTATCCCCAGGGGCTCTCTCTCCACT///TCTACCAGGAATGCTAAGCTGCAGGACCCTCCATTAACTCTGAAGCCCCCAAAGCCCGTG///AACAAGCTGGATGAAGTGAAGCTCTCAGTAGTCACCTACTTGACCAACTCCATAGTAGAC
A_73_110312	0.0383705	0.00822891	up	2.29921	2.29921	1.20114		Rep: Endonuclease YhcR - Stigmatella aurantiaca DW4/3-1, partial (3%) [TC407766]	TAACTGAATTATTTTATTTCTTATGTTCACGTGAGAAACATATGCCAAATGATTAGTGGA
A_73_P084666,A_73_P415206|510272	0.0242903	0.00296859	up	2.29824	2.29824	1.20053	PRRC1	Bos taurus proline rich coiled-coil 1 (PRRC1), mRNA [NM_001206000]	AGTTTTTCTTTTCTAGAAAGGTGTGGTATCATTCCAGTAGATGAAAAGAAACAGGTCCTT///ACTGAAATTGAAAAATGATGGAAGAAAGTGGAATAGAGACAACACCACCTGGGACCCCCC
A_73_116724,A_73_P082731|786476	0.0350513	0.00683368	up	2.29788	2.29788	1.2003	SERTAD2	PREDICTED: Bos taurus SERTA domain containing 2 (SERTAD2), transcript variant X2, mRNA [XM_010810111]///SERTA domain containing 2 [Source:HGNC Symbol;Acc:HGNC:30784] [ENSBTAT00000033010]	GGTTTGGGCTGTAATCTGAACAATTGGACAGATTAAATGTACATGGAAATGAGCAGTCTT///ACTTGACCCTGGACGACATCCTGTTCGCCGACATTGACACGTCCATGTACGACTTCGACC
A_73_P255421,A_73_P039481|525916	0.0182882	0.00101802	up	2.29716	2.29716	1.19985	BTBD1	Bos taurus BTB domain containing 1 (BTBD1), mRNA [NM_001098060]	TTAGTTCTCCTGGCAATAATAATGGCACTTCAATAGAAGATGGGCAAATACCAGAAATAA///ATTATCATACACCCCGGCTAAGCAGTACCATGCAGTCTAGTCTCAACGGCATAAAGAACT
A_73_111085,A_73_P077744|510101	0.0271706	0.00396827	up	2.29692	2.29692	1.1997	RAB33A	Bos taurus RAB33A, member RAS oncogene family (RAB33A), mRNA [NM_001192993]	AGCAATTATCACTGGAGGGTTTTTTCTTTCCCTTTTTTCCGTGCCTGCGTAACACTGACA///TCAATTTTCATGTGCCTGGCTTGCCGATTGAAGGCTCAGAAATCTCTGCTCTATCGTGAT
A_73_118081,A_73_P087106|540944	0.0186433	0.00112079	up	2.29382	2.29382	1.19775	TRAF1	Bos taurus TNF receptor associated factor 1 (TRAF1), mRNA [NM_001192801]	CGGGTCAGGACCTCTGAGCCACCCGCAGATGCTGTCCTTTTGTGTGTATAAAACCAGAGA///ACGTGAAGGACGACACCATGTTCGTCAAGTGCGTCGTGGACACTAACACTTAGAGCGGCG
A_73_119178,A_73_P076211|538866	0.0304851	0.00505638	up	2.29363	2.29363	1.19763	HIPK3	Bos taurus homeodomain interacting protein kinase 3 (HIPK3), mRNA [NM_001193007]	AGAAACTCACTTTTAATGTGTTTTGCACATTTGGTATAACTTGGCTTTGGGCATGTTATC///CCTGCGTATACTGGATTTCCATTGAGTCCAACCAAACTCAGCCAGTATCCATATATGTGA
A_73_101376	0.0316321	0.00552182	up	2.2928	2.2928	1.19711		Rep: LOC113230 protein - Homo sapiens (Human), partial (71%) [TC400707]	TCCTTCTGGCCTTGTCTGTTAGAGGACAGGGATCCTCGGCTGGGCCTACTCCCCAATAAA
A_73_104207|539251	0.0228786	0.00242353	up	2.29026	2.29026	1.19551	AUNIP	Bos taurus aurora kinase A and ninein interacting protein (AUNIP), mRNA [NM_001083742]	GATTCCCGGCGCGGAGCAAACATGAAAGCAGTAAAACAAAGCTCTTGCCCTATTCCTGGG
A_73_P421106,A_73_109115,A_73_P032081,A_73_P293866,A_73_P254726|533851	0.015973	0.000352666	up	2.29022	2.29022	1.19548	PDLIM7	Bos taurus PDZ and LIM domain 7 (PDLIM7), transcript variant 1, mRNA [NM_001017947]///Bos taurus PDZ and LIM domain 7 (PDLIM7), transcript variant 2, mRNA [NM_001113251]	TGAAGAAATCAAGGGAAAAGTATGTCCTGGAGCTGCAGAGCCCACGCTACACCCGCCTCC///CTTCACTCTTTGCCCTGTGGTACTGCTGTCTGCCAGGTCTGTGCTGGCTTTTTGGGCATG///ATGTCAGATCAACCTGGAAGGAAAGACTTTCTACTCCAAGAAGGACAAGCCCCTTTGCAA///TTGTGCCAAGTGCAAGAAGAAGATCACTGGCGAGGTCATGCACGCCCTGAAGACGACCTG///AGATGTTTGGCACAAAATGCCGAGGCTGTGACTTCAAGATCGATGCTGGGGACCGCTTCC
A_73_P483523,A_73_P080541|533096	0.0436814	0.0105422	up	2.28988	2.28988	1.19527	ENTPD5	Bos taurus ectonucleoside triphosphate diphosphohydrolase 5 (ENTPD5), mRNA [NM_001192752]	TTGTATGGAATTATGTTTGATGCAGGGAGCACTGGGACGCGAATTCACGTTTACACCTTC///AATCTTTGAGGTTCCTTGTATATCAGAGAGCCAAAAGTAACAGCTTTGGAACTTAATCTT
A_73_100620|541211	0.0287829	0.00449958	up	2.28984	2.28984	1.19524	DIXDC1	DIX domain containing 1 [Source:HGNC Symbol;Acc:HGNC:23695] [ENSBTAT00000040095]	ACTGTCAAGGAAGAGGTTTTCCACGATGATGATGCCATTCCTGGATGGGAAGGGAAAATT
A_73_P487053	0.0362041	0.00731878	up	2.28945	2.28945	1.195			AAACCATCCTGGATATTCCCGCAAACCCGACAGTTGAAAAGCCCTTCGTGGAGATATTAT
A_73_102644	0.0273677	0.00402883	up	2.28942	2.28942	1.19498		Rep: Uncharacterized protein C11orf61 homolog - Mus musculus (Mouse), partial (5%) [TC422505]	CTCTTGTCTGGCTGCTGCAGCTTGTCTATAATGCCCTGACATGTTGCATTTTCCTCATTT
A_73_P030116,A_73_P203467|538477	0.0239852	0.00286581	up	2.2894	2.2894	1.19497	RALA	Bos taurus RAS like proto-oncogene A (RALA), mRNA [NM_001034644]///LB02628.CR_H14 GC_BGC-26 Bos taurus cDNA clone IMAGE:8220352, mRNA sequence [DV883783]	AATGTCGACAAGGTATTTTTTGATTTAATGAGGGAAATTCGGGCCAGAAAGATGGAAGAC///TTAGAAACTGAAAGATACCTGGTTACATCATTCTGGGTTGTATCTGGCATCCTCATGGTG
A_73_111904|618618	0.027266	0.00399622	up	2.28904	2.28904	1.19474	CREG2	cellular repressor of E1A stimulated genes 2 [Source:HGNC Symbol;Acc:HGNC:14272] [ENSBTAT00000028202]	AGGACCTCCTGGTGGCCGATCTGATGAAGAACCCCATGGCCTCGCTCCTGCTGCCAGAAT
A_73_P401211,A_73_112409,A_73_114983|280968	0.0342057	0.00651914	up	2.28865	2.28865	1.1945	TPPP	Bos taurus tubulin polymerization promoting protein (TPPP), mRNA [NM_173976]	TTTGAGCAGTTCAAGGAGGCGCTGGAGGAGCTCGCCAAGAAGAGATTCAAAGACAAGAGC///CATGCCCATGGACCAAGGCTGTGCTAAGGGTGGGCACTGAGCTGAGGGCTGCTGTGCAAA///CATACCTCCTCGTGTGCTCCCTGTTGTTAACATTGTGTCCGGTTGGTAAAGTGACAAATA
A_73_P065571,A_73_116554|541093	0.0239102	0.00283844	up	2.28699	2.28699	1.19345	NXPH3	Bos taurus neurexophilin 3 (NXPH3), mRNA [NM_001192824]	TAGAGTTCCACCAGGAGCAGCAGATCTTCATTGAAGCCAAGGCTTCCAAAATCTTCAACT///TTTGTGAAATCACCTGATGGTCAACTTGTGTGTGCAGACTCTTGTTCACTGAGCAGGGAA
A_73_P262431,A_73_119890|540124	0.0206059	0.00175544	up	2.2846	2.2846	1.19194	DKKL1	Bos taurus dickkopf like acrosomal protein 1 (DKKL1), mRNA [NM_001046469]	TTTTCTAGGTCTTCAGAGTCTACTCCAAGGCTTCACACGCCTTTTCCTGAAAGATGACCT///CGGGGAAGCCTGCCTGTACCCTCCACCAGACCCCAGCACCATATGGAAATTAAACCTTTT
A_73_P485558	0.0302276	0.00497722	up	2.28393	2.28393	1.19152			GTCATTAAAAAGGAGCATGTACTGGCTGCAGCAAAGAATTTTGTAAATGAATTTGAGTAC
DCP_20_1	0.0295169	0.0047147	up	2.28359	2.28359	1.1913		Unknown
A_73_105523|540666	0.0194515	0.00135036	up	2.28349	2.28349	1.19124	HDAC8	Bos taurus histone deacetylase 8 (HDAC8), mRNA [NM_001076231]	CTTCAGTTTCACCTCCAAAGTCATGACGGTGTCCCTGCACAAATTCTCTCCAGGATTTTT
A_73_108930	0.018437	0.00107331	up	2.28347	2.28347	1.19123		Rep: CDH8 protein - Bos taurus (Bovine), partial (11%) [TC439222]	TTTTGGCAAAGCAATCCGTACATTTCTCTTATTTATTAAATCACTGGCTTTGGTGTTACG
A_73_115109|507948	0.032409	0.0058268	up	2.28322	2.28322	1.19107	PTCH2	patched 2 [Source:HGNC Symbol;Acc:HGNC:9586] [ENSBTAT00000033308]	CCCCGCCAATCTCTCACCACATAAATTATTTATATGGAGATGTTTATTTTTGTAGTTTGG
A_73_105243,A_73_P037486|538515	0.0462913	0.0117041	up	2.28163	2.28163	1.19006	FAM107A	Bos taurus family with sequence similarity 107 member A (FAM107A), mRNA [NM_001083488]	AACCAGCTGGAGAAACCACCAGAAAAGGAAGAGGACCACGCCCCTGAATTCATTAAAGTC///GTTTTTACATGTCTGTCCGGCAAGAGTCATGCTAAAAATGCACAACCCCTGAGTAAAGAC
A_73_P247056,A_73_102963,A_73_P334336|505149	0.0227095	0.00238283	up	2.27999	2.27999	1.18903	DYRK3	Bos taurus dual specificity tyrosine phosphorylation regulated kinase 3 (DYRK3), mRNA [NM_001100298]	CAAAACTTCTGGAACAATCCAAACGTGCCAAGTACTTTATTAACTCCAAGGGCCTGCCTC///GTTAAAAGAACTCTTCACAAGGGCTAAATTACCTAACCAGCTTGTATTGGCCATCCTGGA///TAAAACCGGTAGCATGAACGTGATTCACATGCTAGAAAGTTTCACATTCCGGAACCATGC
A_73_P084601|510442	0.0386471	0.00833832	up	2.27882	2.27882	1.18829	DOT1L	DOT1 like histone lysine methyltransferase [Source:HGNC Symbol;Acc:HGNC:24948] [ENSBTAT00000013182]	AGCTGACCTCAGTTTACACAGCTTCAGTGATGGTGCTTCTCTCTCCCACAAGGCCCCCGA
A_73_101052	0.0161901	0.000477838	up	2.27291	2.27291	1.18454		Rep: DNA replication complex GINS protein psf2 - Aspergillus fumigatus (Sartorya fumigata), partial (6%) [TC417098]	GGTGAGCCTGTAGTTCCTTCTCACTGTTAGACTTTTGCCCCCTACAAGTGTATCCAATAA
A_73_118193|508268	0.046797	0.0119352	up	2.27205	2.27205	1.184	CLDN11	Bos taurus claudin 11 (CLDN11), mRNA [NM_001035055]	CCCTAAACTCTCCAAACTTGATGGTGCATTTTGTTCTTTAAGTGAAATCTGTGCAATAAA
A_73_112435	0.0253053	0.00330867	up	2.26974	2.26974	1.18253		PREDICTED: Bos taurus chromosome 13 open reading frame, human C20orf112 (C13H20orf112), mRNA [XM_001253180]	CAACCCCCAGATAATTACCTTTCAAGTCTTAGGTGAGCAGAATCGCATATTTATTGAGAA
A_73_P296232,A_73_109640,A_73_P244305,A_73_P276266,A_73_P253846|614773	0.0212301	0.0019616	up	2.26654	2.26654	1.18049	ZFP36L1	Bos taurus ZFP36 ring finger protein like 1 (ZFP36L1), mRNA [NM_001101234]	GGACTGCAAATTGAGTTTCTTTCTCTTTTGGGCTTTCCAACTAGGACTGAAAATGTATGT///CCACACATTAAGATGAATGTAATTATTATTCCTCTTGCTGGTCACTACCGTCGCTTTCTA///GAAGACTGCAAAAGCGGATGAAAGATTGTGACATAAGTGGGACTTTGTGATTTAATTTTT///GTAAAAGTTCTGTGACAGTACAGAAGGAAAACAACTTCTTATGTATAGCTTCTAAAAGGG///TTTGGACAACTCAAGACGCCTGCCCATTTTCAGCAGACTTTCCATCTCAGATGACTAAAC
A_73_P163247|527577	0.0332454	0.00614452	up	2.26616	2.26616	1.18025	LOC527577	PREDICTED: Bos taurus tripartite motif containing 4, transcript variant 1 (TRIM4), partial mRNA [XM_605970]	AATTATTCCTTTGAAGACCTAACGGTGAAGACTGTGTGCCGGCTACCAATGATGAAGGAA
A_73_116977,A_73_P311731,A_73_P489228|538772	0.0292941	0.00465015	up	2.26509	2.26509	1.17957	DARS2	Bos taurus aspartyl-tRNA synthetase 2, mitochondrial (DARS2), mRNA [NM_001102222]	TACTTTCCCTGAATCTCTCTTCTTGTCAGAATCCTAGGAGATAAATATATGTGGAAGATA///GCAACCAGCTTCACCACAAGAATCCTATAAAATAACCTGGATAATGACATTTATACTATC///TTTACTCAGATCGACATAGAGATGTCCTTTGTAGACCAGACGGGCGTCCAGAGTCTAATT
A_73_P035356,A_73_P166887|541164	0.0206174	0.00176392	up	2.26371	2.26371	1.17869	TMEM47	Bos taurus transmembrane protein 47 (TMEM47), mRNA [NM_001076262]///Hw_liver_24_050718_D01 Bos taurus CF-24-HW liver cDNA library Bos taurus cDNA, mRNA sequence [DV787691]	CTTTATTGCCTGAACCCTAAGAACTACGAAGACTATTACTAGAACCAATAGTCTCAAATT///AAAGCAGAAGTCTGCTTTCAACTTGTCTTAGGAACTGTTGGCCAAAACAACAGGAAAAAA
A_73_113769,A_73_P030211|768014	0.0155841	0.000225674	up	2.26333	2.26333	1.17845	KIF2A	kinesin family member 2A [Source:HGNC Symbol;Acc:HGNC:6318] [ENSBTAT00000065595]///Bos taurus kinesin family member 2A (KIF2A), mRNA [NM_001077073]	TCTCCAGTTCAAGCTGCAAAAAAGGAATTTGGACCCCCTTCACGTAGAAAATCGAATTGT///CTCGCTACTGTAACATAACAATCATTCAGCTGTAAGGGCCATTTGAAAGTTTGAAATCTT
A_73_100296|540933	0.0196233	0.001391	up	2.26284	2.26284	1.17813	HELLS	helicase, lymphoid-specific [Source:HGNC Symbol;Acc:HGNC:4861] [ENSBTAT00000007848]	TTGGAGCTAAAAGAATGTCTTCAAAAAGTTCTTGTTCACATCTAGTGATCTGTATTGGTG
A_73_103042|535342	0.0184584	0.00108017	up	2.2613	2.2613	1.17715	SLK	Bos taurus STE20-like kinase (SLK), mRNA [NM_001206077]	AGCATGCTGTGGTTGGGTTTGGCTTTTTAAGTACGTCATTCTGTTCTCTTCATCTTTAGC
A_73_P047561,A_73_P335836|614429	0.047047	0.0120319	up	2.26091	2.26091	1.17691	YBX2	Bos taurus Y-box binding protein 2 (YBX2), mRNA [NM_001098126]	TTATGAACTGTCATGTGCCACCTGAGCCTCCAGTAAAAACAAAAACGGGCTTTCCTGTTG///CTATTAAGAGAAACAACCCCAGGAAGTTTCTGCGCAGCGTTGGGGATGGGGAGACCGTGG
A_73_112008,A_73_P511308|783333	0.0280617	0.00428665	up	2.26059	2.26059	1.1767	RND3	Bos taurus Rho family GTPase 3 (RND3), mRNA [NM_001191158]	TGCAGCATTATGCTTTGGGCAGTATTACAAAATAGCTGGCAAGTGCTTTCTGTATTTAAA///CATTATGCTTTGGGCAGTATTACAAAATAGCTGGGCAGTGCTTTCTGTATTTTAATATTG
A_73_118905,A_73_P154567,A_73_P092371|282343	0.0212301	0.00196163	up	2.25784	2.25784	1.17494	S100A4	Bos taurus S100 calcium binding protein A4 (S100A4), mRNA [NM_174595]///CES006191 Bos taurus skin cDNA library Bos taurus cDNA clone CCL006191 5', mRNA sequence [CF767816]	GTGGGCACATCAGCTCACCCTGGCTCCTCCAGACGTGAGCACCATACTGAACAAGTTCAA///TAAGTAACTTCCCAAGGAAGTCCGTGTTTAAAGCTGAGATCATGAACCGCGATGGTCGAA///CCTGGCTCCTCCAGACGTGAGCACCATACTGAACAAGTTCAATAAAGATTCTTGAAAGCT
A_73_P171327,A_73_P317261,A_73_104599,A_73_P096731|540975	0.0160971	0.000380653	up	2.25736	2.25736	1.17464	TIPARP	Bos taurus TCDD inducible poly(ADP-ribose) polymerase (TIPARP), mRNA [NM_001206048]	CCATATTTACTCTGTCCAAAGCACTGCTGCTGTGGTGTAGGATGAGTTTATGGCATTCTA///AATAATAAATGAGAGACATTTATTTCATGGGACATCCCAGGATGTGGTAGATGGGATCTG///CAGCTGAGGCTGGGTTAGTTGTCCTTTCATTCAGTTGTAACTTGTAAACCAGTAATTCCC///CCAGAGTTACCCTTATTTTGTTATCCAATATGAAGAAGTCAGTAACACTGTTTCCATTTG
A_73_P031771,A_73_109818,A_73_P098966|281209	0.0229586	0.00244153	up	2.254	2.254	1.17249	GPX1	Bos taurus glutathione peroxidase 1 (GPX1), mRNA [NM_174076]	TAAGTTCATCACCTGGTCCCCGGTGTGCCGCAACGACGTCTCCTGGAACTTCGAGAAGTT///TCTAAACCTACGTGGAGGAATGCCTGATGTCCAGGAAAATCCCCTGAGGTGGGCGCTGGT///AACTTCTCGAAGTTCCAGGAGACGTCGTTGCGGCACACCGGGGACCAGGTGATGAACTTA
A_73_P060566,A_73_P410636|505285	0.0188217	0.00114806	up	2.25332	2.25332	1.17205	PTPRE	Bos taurus protein tyrosine phosphatase, receptor type, E (PTPRE), mRNA [NM_001205531]	GGCCACCTGCTGTAAAGTTGTTAAATCTTAAATACGCCCTTTAAAAACTGGAATAATGTA///TTCAGACAGACATGCAGTACACGTTCATCTACCAAGCCTTACTGGAGTACTACCTCTATG
A_73_107504|506032	0.0409307	0.00935963	up	2.25249	2.25249	1.17152	C19H17orf75	chromosome 17 open reading frame 75 [Source:HGNC Symbol;Acc:HGNC:30173] [ENSBTAT00000027955]	TGTGAAGTCCTGCAAGCCGTGGTGTTTAAAACTGTGGTAGTTTGGTAACTGTCATAGGAT
A_73_103215	0.0371125	0.00765498	up	2.25059	2.25059	1.1703		Rep: Pseudouridylate synthase 7 homolog - Bos taurus (Bovine), partial (11%) [TC479685]	CTGGTGTTCTGTGTTTATCCACCTTTTCTGTGCTTAGGCCACACCACGCCTTCCTTTTTT
A_73_P114696,A_73_114660|518435	0.044883	0.0110662	up	2.24858	2.24858	1.16902	SYNJ2	synaptojanin 2 [Source:HGNC Symbol;Acc:HGNC:11504] [ENSBTAT00000039096]	TATAATGTCAAGCAGATCAAAACAACCAACACTCAGGAGGCAGAAGCAGCCATCCGATGT///AATCAGTGACAAGGACAAGAGAACGGTGCTGCAGGCGTTTGACCCACTGGCGAAAACCTG
A_73_105254|523154	0.0198435	0.001475	up	2.24673	2.24673	1.16783	GALE	Bos taurus UDP-galactose-4-epimerase (GALE), mRNA [NM_001206208]	CTAATTTATACTGCTATGAAGAAGCATCCCAAAGTATTTAAAATAAACAGTTTTCTTACA
A_73_P054611,A_73_120650,A_73_P061891|281879	0.023143	0.00256589	up	2.24619	2.24619	1.16748	ITPR3	Rep: Inositol 1,4,5-triphosphate receptor, type 3 - Bos taurus (Bovine), complete [TC399083]///Bos taurus inositol 1,4,5-trisphosphate receptor type 3 (ITPR3), mRNA [NM_174370]	TCTCACAGGACTGTTGCTTGGTCCCTTAAAGCAGTAACTGACGTTGCTTCGTATTCCTCC///GCTCACCCTAGTGCCTTAAAGGAAGTCCATCCTCTCACAGGACTGTTGCTTGGTCCCTTA///TTTGAGGAGCACATCAAGTTTGAGCACAACATGTGGAACTACCTGTACTTCATCGTGCTG
A_73_P133721,A_73_P058981|618833	0.0211709	0.00193624	up	2.2448	2.2448	1.16659	IQCE	IQ motif containing E [Source:HGNC Symbol;Acc:HGNC:29171] [ENSBTAT00000019288]	TTCAGACGCTGACCAGGAAGTTTCAGGAGCTGGAAGGAAGTAAGAAGGACAAGGAAGATG///TAAAGGTTGGAGAGTAATGTATCTTGTTAGGAAAAGAACGCTACCTGCTGGACACCTCGG
A_73_108464	0.0176145	0.000899607	up	2.24473	2.24473	1.16654		Rep: Alanine aminotransferase 2 - Homo sapiens (Human), partial (72%) [TC482086]	AGGCCTACATGTCCTTTTTCCAGTCTGGATTCTCATAGGCATCTCCTGACAAAGGTACTT
A_73_120504	0.0250595	0.00322691	up	2.24325	2.24325	1.16559		179533 MARC 4BOV Bos taurus cDNA 5', mRNA sequence [BE681761]	CCCGGCTCCAGAACACTACTGTAACTACCTACCCAATAAAGCCCAAGGGCACGTGCTGGT
A_73_P293041	0.0170714	0.000765372	up	2.24209	2.24209	1.16484		Rep: MAP kinase-activated protein kinase 2 - Homo sapiens (Human), partial (60%) [TC421138]	CCCTCGACACTGTGCTCATTTGGCAATTTTATCAGTAATTTGACTTAGAATTTTTACGAA
A_73_115938	0.0197041	0.00143449	up	2.23997	2.23997	1.16348		Rep: Mannose-1-phosphate guanyltransferase subunit beta - Bos taurus (Bovine), complete [TC395818]	AAACCCCACAAAGCCCACTCCCTTAAGAACAACTGGGCTGGGACTGTATGGAATAATAAT
A_73_P090096,A_73_P108596|317660	0.0280414	0.00426287	up	2.2389	2.2389	1.16279	HOXC6	homeobox C6 [Source:HGNC Symbol;Acc:HGNC:5128] [ENSBTAT00000012174]	TTATCACTGGCACAATTGATGTGTTTGGACTCCCTGAGACAAAATTAGGGAGTCAAATAT///AAACACCTTAGGACATAACACACAGACCTCAATCGCTCAGGATTTTAGTTCTGAGCAGGG
A_73_118747	0.0255129	0.00337645	up	2.23876	2.23876	1.1627		Rep: Lj965 prophage terminase small subunit - Lactobacillus johnsonii, partial (11%) [TC401255]	GTTGCGTGTTGTCTGTTGGCATGCTTAAGCACATGTCCATTAAAATTCATTTTGTTCCTT
A_73_P488608	0.0433207	0.0104168	up	2.23806	2.23806	1.16225			TTTTGAGAGCTCCGGTATTGTTCTTTGATAGAAATCCAGCTGTGAACCAGACACCCTGTG
A_73_P056831	0.0212694	0.00197217	up	2.23799	2.23799	1.1622			CCCTGGGTATTCTCAGGAACTGTGAGGAGTAACATTTTATTTGGGAAGAAATATGAAAAA
A_73_107560	0.0409307	0.00935313	up	2.2366	2.2366	1.16131		PREDICTED: Bos taurus cytoplasmic polyadenylation element binding protein 2 (CPEB2), mRNA [XM_010806407]	CTTCCAGGTGTCTAAATCTCCAGTCTGTCTGTTGTACTGGTAATTTAACTCTGTAATGGA
A_73_P441166,A_73_P036456|534708	0.0196316	0.00139351	up	2.23594	2.23594	1.16088	RAB11A	Bos taurus RAB11A, member RAS oncogene family (RAB11A), mRNA [NM_001038162]	GAAGCAAATGTCAGACAGACGTGAAAATGACATGTCTCCAAGCAACAACGTGGTTCCTAT///GCTGTGTATAGTCCAATTCCCAGGTCTGAGATTTAAATATATTTGTAATTCTTGTGGTCA
A_73_100627	0.0209349	0.00188773	up	2.23571	2.23571	1.16074		Rep: EH domain-binding protein 1. - Canis familiaris, partial (34%) [TC402817]	TCTAGCTTGGTTCCCACATTTTGTTGGGTCTCAAAATTGGCTCAAGAATGCTGTTATTAT
A_73_P042441,A_73_103734|281644	0.0283604	0.00437168	up	2.23441	2.23441	1.15989	BFSP1	Bos taurus beaded filament structural protein 1 (BFSP1), mRNA [NM_174247]	CTGTCATTGTGGAGACCATGATTGAAAAGACGAAGGCAAACAAGAAGAAACTGGGAGAGA///GGTACAAGGTTCTTTGGATTAGATCATGGTTGGCCCATCTGGCTTACCAATGAAGCCTTA
A_73_110289	0.0161901	0.000407883	up	2.2337	2.2337	1.15943		Rep: Predicted protein - Sclerotinia sclerotiorum (strain ATCC 18683 / 1980 / Ss-1) (Whitemold) (Whetzelinia sclerotiorum), partial (18%) [TC422760]	CCATTAGTGCTACCACCGTCTCACATTACAATACAATTACTGGAAGCAAGTACTGCATTT
A_73_P047511,A_73_P112646|533051	0.0208339	0.00185424	up	2.23112	2.23112	1.15777	MIC1	Bos taurus major histocompatibility class I related protein (MIC1), mRNA [NM_001127317]///Rep: MHC class I-related chain - Bos Taurus, partial (83%) [TC410677]	AGACCATGGACTTGAATGAGAGCTGGAAGGAGCTCAGAAAACTTCTAGCAGAAATCCTGT///AAACTGTAAAAATTCCCCAAGGAGAGGAACAGTGGGTCAAGTGCATTGTGGAACACAGCA
A_73_114016|767943	0.0162642	0.000554787	up	2.23042	2.23042	1.15732	TTYH1	Bos taurus tweety family member 1 (TTYH1), mRNA [NM_001077015]	TCTCCACTTGCAGCACCCAACCTGGGAATGGGCTGATTTGAAATAAAAGGGAAGACTTTA
A_73_P343851	0.0282925	0.00435346	up	2.23014	2.23014	1.15714			CCTCCTCTCCTTTGCCTCCCTATTTAAGAAACAGAATGCCTGCCAAAGAAATATATAAAA
A_73_P068791,A_73_P085876,A_73_P085882,A_73_P102871,A_73_P085871|445419	0.0173546	0.000836629	up	2.23008	2.23008	1.1571	FZD3	Bos taurus frizzled class receptor 3 (FZD3), mRNA [NM_001192964]	ATTGGATGCTACTTTTATGAGCAAGCTTACCGCGGCATCTGGGAAACAACGTGGATACAA///TAATCCTATGACTCACATCACACATGGCACCAGCATGAATCGGGTTATTGAAGAAGATGG///GATCTCATAACAAAGCCTGTACCATGCTTTTTATGGTACTCTACTTTTTTACTATGGCTG///TACCATGCTTTTTATGGTACTCTACTTTTTTACTATGGCTGGCAGCGTTTGGTGGGTAAT///ATGACTCACATCACACATGGCACCAGCATGAATCGGGTTATTGAAGAAGATGGAACCAGT
A_73_107414,A_73_P210277|504255	0.0372074	0.0077298	up	2.22856	2.22856	1.15611	RGS17	Bos taurus regulator of G-protein signaling 17 (RGS17), mRNA [NM_001101836]	AAATCCTCATGGGGAATTCCTCTGGTTGTTCACTGCCAAAACTGTGGCATTTTCATTACA///AGTAGCTGAAATGCGAAAAAGGCAGCAGTCACAGAATGAAGAAACACCTGCTGTGTCTCA
A_73_P113611,A_73_P104091,A_73_P070711,A_73_P052791|519148	0.029542	0.00472463	up	2.2265	2.2265	1.15478	STX2	syntaxin 2 [Source:HGNC Symbol;Acc:HGNC:3403] [ENSBTAT00000061491]	ATGTCGAAGAAGTGAAGAAAAACCACAGCATCATTCTTTCTGCACCAAACCCAGAAGGAA///TCGAAGAAGTGAAGAAAAACCACAGCATCATTCTTTCTGCACCAAACCCAGAAGAAAAAA///GCTGTGTCACTGGTTCTGTTGGCTGTGATTGCTCTAATTATTGGTTTATCAGTTGGCAAG///TCAATGAAATTGAGTCCCGTCATAAAGACATCATGAAGCTGGAGACAAGCATCCGTGAGC
(+)E1A_r60_a20	0.0221046	0.00218461	up	2.2264	2.2264	1.15471		Unknown
A_73_P033956,A_73_115978|281350	0.0271489	0.00394961	up	2.22538	2.22538	1.15405	NGF	Bos taurus nerve growth factor (NGF), mRNA [NM_001099362]	CGCCCCTCCCTACCTCAACCTGTAAATTATTTTAAATTATAAGGACTGCATGATAATTTA///ACAGCGGGTGCCGAGGCATCGACGCGAAGCACTGGAATTCGTATTGCACCACGACCCACA
A_73_P044941,A_73_P277106|540815	0.0219821	0.0021617	up	2.22431	2.22431	1.15336	ABI1	Bos taurus abl interactor 1 (ABI1), mRNA [NM_001076241]	GTGGGAAGGAAACTGTTTTTTGTGAGTTTATTTGCTTTTTGTCATCTACTTCTATGCCAA///ACAAAACCCTTGAGCCTGTTAAACCTCCAACAGTTCCTAATGACTACATGACAAGTCCTG
A_73_101175	0.0222735	0.00222882	up	2.22219	2.22219	1.15198		PREDICTED: Bos taurus calcium [XM_003585435]	CGTTTTGTCCTTCAGCAAGGAAGGCGGAAGCATGATGTGCACTATATTGTGGTTCTGTTT
A_73_113586,A_73_P046436,A_73_P322726|540367	0.0469926	0.0120029	up	2.22195	2.22195	1.15183	PCED1B	Bos taurus PC-esterase domain containing 1B (PCED1B), mRNA [NM_001101207]	GCTGAGTGAAAGAAAAGAGCTAGGCGGTGCAGACGTCATGGTCCATCTACTGGCCTCCGA///GCATCATTCCTGCCTTCCCGCTGCTTATTCTCTGTCTTTTTGTAAATATACAATTGAAAT///AAATCACCAGTTACTTTAATGACCTTCCGCAGACCCGCTGAGTGAAAGAAAAGAGCTAGG
A_73_P204047	0.0436918	0.0105497	up	2.22112	2.22112	1.15129			TTTTATAGTGTGCTGGGAGAAAATGTTGAAGACCTCAGAATTCAGAGGGAAGGCAGGGCA
A_73_P066301	0.0325925	0.00591159	up	2.22068	2.22068	1.151		PREDICTED: Bos taurus notum pectinacetylesterase homolog (Drosophila) (NOTUM), mRNA [XM_604035]	TTTGGCTACAAAGTCTACCCAACTCTGCGCTGCCCGGTGTTCGTGGTGCAGTGGCTGTTT
A_73_P319096,A_73_P145296,A_73_114152|538632	0.016629	0.000683076	up	2.2195	2.2195	1.15024	SCAF11	Bos taurus SR-related CTD associated factor 11 (SCAF11), mRNA [NM_001205567]	AGGTGGTTTTGCCTACACAGATCAAAATGAAAACAGGTGGCAAAACCGAAAACCCCTCTC///GGACACTGGCGAGATATCTGCAAAGTGCAATTTCAACATGTACCTTTAACAAAAATCATA///CAAGGTGATGGTTCTCAGCTACCTATGAATATGATGCAGCCACAGATGAATGCAATGCAG
A_73_P047226|617268	0.0393959	0.00869101	up	2.21932	2.21932	1.15012	FAM131B	Bos taurus family with sequence similarity 131 member B (FAM131B), mRNA [NM_001078072]	ATCTTGAGTATATCCAGTAGGTGAACAGAGGACCCCACGGACCTGGGAAAGGACCCCCAC
DCP_20_0	0.0320604	0.00568699	up	2.21912	2.21912	1.14999		Unknown
A_73_P418131,A_73_115279|536654	0.0372319	0.00775659	up	2.21719	2.21719	1.14873	GNAQ	Bos taurus guanine nucleotide binding protein (G protein), q polypeptide (GNAQ), mRNA [NM_001110002]	GAGAAAATTATGTATTCCCACCTAGTTGACTATTTCCCGGAATACGATGGACCCCAGCGA///CATCCCTTCCTCTTGATTTTTCCCACATTACGATGGCCTTTATCATAGTTCCATTCTTGG
(+)E1A_r60_1	0.0236177	0.00273136	up	2.21521	2.21521	1.14744		Unknown
A_73_100580,A_73_P071816|529230	0.0200172	0.00155573	up	2.21266	2.21266	1.14578	CEP170	Bos taurus centrosomal protein 170kDa (CEP170), mRNA [NM_001035377]	ATCACCACTGTTTCATCTTTGTTTAATGTTTGGGTACTGATGATATCAATATGGAAGTCG///AATTATTGGAAACAGCGTAGTGTTGACTTTTAGAGAAAATAAGACAGCTTGGTCAACTGC
A_73_110801	0.0178956	0.000950547	up	2.20998	2.20998	1.14404		PREDICTED: Bos taurus hdc homolog, cell cycle regulator (HECA), partial mRNA [XM_010799008]	AGAATGTTGATAAAATTGAAACATTTGGAATTGTGTGGTGGTAGCAGGTTTCTGTTTGTG
A_73_104418|540514	0.0155841	0.000248093	up	2.20968	2.20968	1.14383	ARSJ	arylsulfatase family member J [Source:HGNC Symbol;Acc:HGNC:26286] [ENSBTAT00000023672]	AAAGAAACAGCAGAAAGAGCGCTCGTTTCCAAACTGCCATTCAGGGATTTCTCGTGGATA
A_73_P364586,A_73_109188|524002	0.0250269	0.00321859	up	2.20603	2.20603	1.14145	SEMA4G	Bos taurus semaphorin 4G (SEMA4G), mRNA [NM_001101117]	ATTCCATGGCTGCACAATCATGTGATTCCATGTCTTCCCGATTCCAGGACCCTCCCTGGC///GCTCCCCCATTTCCCTCGGGTGAAGATGACTGTTATTTTTGTAGCTGAGAACGTGGAATC
A_73_P047651|535288	0.0236177	0.00273362	up	2.20423	2.20423	1.14027	ZNRD1	Bos taurus zinc ribbon domain containing 1 (ZNRD1), mRNA [NM_001046400]	ATCGTCATGTGTGGATTACCATTGTCCCCAGAGTACTCCTACCCTCATTGAGTTTCCTTA
A_73_P056101,A_73_P398386|541114	0.0251427	0.00326467	up	2.20412	2.20412	1.1402	RAB39A	Bos taurus RAB39A, member RAS oncogene family (RAB39A), mRNA [NM_001192830]	TTTGTTCCAAATACTGTGCATTCTTCTGAGGAAGCAGTAAAGCCCAGGAAAGAGTGCTTC///TTGAGGAATCCTTCACTATCTTGACAAGAGACATATATGAACTTATTAAAAGGGGAGAGA
A_73_P367701,A_73_P264976,A_73_112201|535702	0.0295921	0.0047576	up	2.20392	2.20392	1.14007	KLF5	Bos taurus Kruppel like factor 5 (KLF5), mRNA [NM_001083727]	AAGGGTTACCTTACAGTATCAACATGAACGTCTTCCTCCCTGACATCACTCACCTGAGAA///TTAATACCAAAGTGTTTGGTCCTTGTCCGAATCTGGAATGCTTGCTATATGCTGGCTTGA///TAATGGAGCAAACAGCTGTATAGTTGTAGAATTTTTTGAGAGAATGAAATGTTTATATAT
A_73_P456736,A_73_118163|539381	0.0155841	0.000230689	up	2.20372	2.20372	1.13994	CSRP2	Bos taurus cysteine and glycine rich protein 2 (CSRP2), mRNA [NM_001038183]	AATTCACGATGAAGAAATCTACTGCAAATCCTGCTACGGAAAGAAGTACGGGCCAAAAGG///TAGGCTGGCTGACTAGTAGGAAGACAGCACTGTATCTTTTTGCTTTTATTCATCAGTATT
A_73_P034926,A_73_P279606,A_73_P345726,A_73_P265101|510368	0.0161901	0.00047612	up	2.20297	2.20297	1.13945	LRRFIP2	Bos taurus LRR binding FLII interacting protein 2 (LRRFIP2), mRNA [NM_001038070]	TGAGCTTTGGCATTCAGATAGCCACCTTTGTATTTTCTAATTTATGAGAGAATGAAACAG///ATACCCTAAAGGATGTTATTGAAGAGCAGGAGGAACAGATGGCGGAATTTTATAGAGAAA///AAGACCGATTTTCTGCAGAAGATGAAGCTTTGAGTAACATTGCCAGAGAGGCAGAGGCAA///AAACTCGCTGGGGAAAAGGAAGAGCTACTATCACAGATTAGAAAGCTGAAGCTGCAGTTG
A_73_103344,A_73_P185257,A_73_P198972,A_73_P087446|768210	0.0303129	0.0050114	up	2.20263	2.20263	1.13923	RELL1	Bos taurus RELT like 1 (RELL1), mRNA [NM_001078098]	TGAGTTGGCTACCACCTTGATGTAAAAATTTGTAAAGGGAATTTTTCACCATTTTGAGTG///ACATTTTAGCAGCAATGGTAGAAGATAACAACGTGTGTGATCCTGAAAGCCCAGTGACGC///GTGCCTTGGGGCACTTCCTTTATTGCAAAAAGAAAACACAGTTCTCATTTATCTCAAAAG///TACAAAAGTGGAACCCAAGTCCAATCAGAAGGAGCGGAGAAGTTTGATGTCAGTTAGTGG
A_73_109335,A_73_P073921|533598	0.015973	0.000335652	up	2.20208	2.20208	1.13887	ASB13	Bos taurus ankyrin repeat and SOCS box containing 13 (ASB13), mRNA [NM_001192781]	AAACTGTGGTGCTGCTGTGGGAACAGCACCCCGAGTCCCTCCGGACCATCCTGTTTCGTC///AACGTGGACCTCATCGAGATGCTCATCCAGTTTGGAGGCAACATCTACGCGCGCGACAAC
A_73_P345191,A_73_P054166,A_73_P049511,A_73_P502498|515697	0.0280617	0.0042717	up	2.20145	2.20145	1.13845	LOC515697	Bos taurus apolipoprotein L, 3-like (LOC515697), mRNA [NM_001102030]	GCCTCAAATACTGAGATCTTTTTTGAGGATGTCAGTTGAATGTCTCTGGGACATACTGAG///AATGCATTGAAAATCTAATTCATGCCATGGAGACAGGCAAAGCCATTCCTGGCTGTGCAG///CCAAGAGACCAGTGAAGTTTCCATGAAAATCCAAATGTGGAGGAGGAACAGAGGTTGATT///GTTAATCCCATCTCCTAATTTACCTATCCCCCCAAAACTTTGGTAAAAAGTTTGTTTTCT
A_73_110124|534891	0.0314159	0.00541799	up	2.20089	2.20089	1.13809	TMEM63B	Bos taurus transmembrane protein 63B (TMEM63B), mRNA [NM_001163939]	ACCTGGGGGTGGGGGTGGGCATGGCTGACACTGGAAAATGGGATTTTGCACTGGTTTTTT
A_73_P084451|521748	0.020655	0.00178523	up	2.20062	2.20062	1.13791	TNFSF9	Rep: Phosphatidate cytidylyltransferase - alpha proteobacterium HTCC2255, partial (5%) [TC423269]	CATTTGCTTGTTTCTCACCTGCAAGCATAGATTGGCTTTGGGTTACAAAAGTGGAAAAAA
A_73_P069199,A_73_P129969|532938	0.0331588	0.00609477	up	2.20043	2.20043	1.13778	ARID3B	Bos taurus AT rich interactive domain 3B (BRIGHT-like) (ARID3B), mRNA [NM_001193048]	TGAGGACCCAGTATATGAAATATCTCTATGCCTACGAGTGCGAGAAGAAAGCCTTGAGCT///TATGGCCAAGCAGATCCTGGACCTGTACATGCTGTATAAGCTGGTGACGGAGAAGGGGGG
A_73_P078367,A_73_119287,A_73_P114331|532053	0.0179973	0.000960121	up	2.20032	2.20032	1.13771	OGT	Bos taurus O-linked N-acetylglucosamine (GlcNAc) transferase (OGT), mRNA [NM_001098070]	TCTCAAACCAGATTTCATCGATGGTTATATTAACCTGGCAGCTGCTTTGGTAGCAGCAGG///TAAGCTAAATTTTCCTTGTTTTAGTTTCTGAACTCTACGGATTAATGGGAACTTTGCTGG///TTATGCAGCTGGCAACAAACCTGATCACATGATTAAGCCTGTTGAAGTCACTGAGTCTGC
A_73_117198|617069	0.036287	0.00734106	up	2.20014	2.20014	1.13759	HS3ST3B1	Bos taurus heparan sulfate-glucosamine 3-sulfotransferase 3B1 (HS3ST3B1), mRNA [NM_001193139]	GATGTGCAGGTGCTGCGGCAGCTGCGGGATTTCTACCGGCCCTTCAACCGCAAGTTCTAC
A_73_P126351	0.0371125	0.00764814	up	2.19689	2.19689	1.13546		Rep: Cell division protein kinase 8 (EC 2.7.11.22) (EC 2.7.11.23) (Protein kinase K35). - Canis familiaris, partial (76%) [TC419280]	GCATGCTTTAAGATGAAAAAAGCATGAGTGATAACTTCCTTAAAAAGGTGCGGCATCCGA
A_73_111925|541283	0.0193883	0.0013168	up	2.19624	2.19624	1.13504	IFRD1	Bos taurus interferon related developmental regulator 1 (IFRD1), mRNA [NM_001034729]	CCTTGACCACTGAGGGCAGTAACACTAATTTTATCTGCTGTGTAAGACCTTGTGCTCTTT
A_73_P344511,A_73_P045011|540640	0.0173221	0.000823328	up	2.19546	2.19546	1.13452	IKBIP	Bos taurus IKBKB interacting protein (IKBIP), mRNA [NM_001081736]	CCTTCTTTCAAGTAGCATTGACCGAACAGCAATGCTCCGAAAGACAGCATCTGAAAATTC///GGACCTCTGTCATGTTATAAAAAGACTGACAGCCGGAAATAATGAAATTTTGGAGTAAAT
A_73_P059811,A_73_114765|516353	0.0162642	0.000551198	up	2.19476	2.19476	1.13406	BAG4	Bos taurus BCL2 associated athanogene 4 (BAG4), mRNA [NM_001110532]	CCTACTGGCTTCTGGAAGAGATGCTAACCAAGGAACTTCTGGAACTGGATTCAGTTGAAA///GCCATGCTGAGTAGAAACACTCACTGCAAAAGTAATAAGCACAACCATTTGGGAATGCTA
A_73_P128466,A_73_P266966,A_73_P088946|615922	0.0231228	0.00254437	up	2.1935	2.1935	1.13324	CCDC136	coiled-coil domain containing 136 [Source:HGNC Symbol;Acc:HGNC:22225] [ENSBTAT00000014612]	TGACGAAGAAGCTTCAGAGGAAAGCAACCCCCTCAAACTTTCTGAGAGCAAAAAGTCATC///ACATGCAGAGCAAGTGTAAGAAATTGACTTGTGAGTTGCAAGAGCTACATCACCATCGCC///CCATCTCCTGCCCTGTCTCAGAACCTGGGTTCCTTGTAATTAAATGTCAACTGAATTACG
A_73_108215,A_73_P388626,A_73_P396146|510932	0.0180588	0.000971383	up	2.19156	2.19156	1.13196	SLC29A1	Bos taurus solute carrier family 29 member 1 (Augustine blood group) (SLC29A1), mRNA [NM_001034398]	CGTGTTCCTACCCATCATGAACCCTGTACATTTGCCATTTTACTGCCTTTTTTATACTCA///TTTCAATGTCTTTGACTGGCTGGGCCGGAGCCTCACAGCCATCACTATGTGGCCTGGGAA///TTCATGACAGCCACTAAGTATTTCACAAACCGCCTGGACATGTCCCAGAATATGTCCTTG
A_73_118704|538802	0.0233799	0.00264828	up	2.19153	2.19153	1.13194	TMEM171	Bos taurus transmembrane protein 171 (TMEM171), mRNA [NM_001014951]	CTTCTGAGCCTTCCCCGCCATGAACCATGGACTCAAATTCAATTTTATATAGAATCAATC
A_73_P037091,A_73_P326996|506459	0.0155841	0.000177903	up	2.19077	2.19077	1.13144	ACSS2	Bos taurus acyl-CoA synthetase short-chain family member 2 (ACSS2), mRNA [NM_001105339]	ACTCTAATCCTATGTCATCTCTCTCAGGAAGCACCAGTACTTATCTTGGGCATGCACTTG///TCTATGTGGCCACAACCTTCAAGTATGTGTTTGACTTTCATGCGGAGGATGTGTTCTGGT
A_73_P459296,A_73_P256806,A_73_100055|777770	0.0195296	0.0013594	up	2.18928	2.18928	1.13046	KIF3C	Bos taurus kinesin family member 3C (KIF3C), mRNA [NM_001078155]	CACCAAGAATGTCAAGGAGATAGAGCACGTGATGAACCTGGGGAACCAGACCCGGGCAGT///GTGGCCCGTTCTTTTCACTCTATACAGTTGACGATACAGGACATATGTAATATATAAATA///CCTGCAGGCCCCAGCCCTGTTCAAATTAACACAGTCGATAATAAAGGAATGAGTATCGTT
A_73_P352351	0.020655	0.00178332	up	2.18777	2.18777	1.12946		LB011144.CR_I18 GC_BGC-11 Bos taurus cDNA clone IMAGE:9070364 5', mRNA sequence [EV615604]	AGCTTTTGGTCACTGGAGGCTAATGCCTAAGAAGTTTAGTTTATGAATGTAAGAATGAAA
A_73_P409336,A_73_P035376|540937	0.0231187	0.00252638	up	2.1862	2.1862	1.12843	MARCH5	Bos taurus membrane associated ring-CH-type finger 5 (MARCH5), mRNA [NM_001034715]	AGCCCTTGTTTTTCCTACTATTGCGACAATAGTTGGTAAACTAATGTTCAGTAGTGTTAA///CAGCAATATTTACGTCAGGCACACCGCAAAATCCTAAATTACCCAGAGCAAGAAGAAGCA
A_73_P472288,A_73_P436496,A_73_P044521,A_73_100290|527051	0.0198755	0.00149609	up	2.18561	2.18561	1.12804	CIDEA	Bos taurus cell death-inducing DFFA-like effector a (CIDEA), mRNA [NM_001083449]	ACGTTTATGGGGTCGCAGACAAAGAAGGTGCTGTTCACACCCTTCATGCATCCCGCTCGC///CTGGGAACTAGGAGAGGGTAGGCTTCGTGTTCAGTATTCTAATCCCAGTAAAATGAACTT///GGAGAGGGTAGGCTTCGTGTTCAGTATTCTAATCCCAGTAAAATGAACTTAAAAAATAAA///AGGATCCAGGGGCTGCACAGTGCCTTCCGCTCCACAATAAACCCATCAGGAAAGCTGCTA
A_73_120595|525355	0.0381099	0.00810137	up	2.18528	2.18528	1.12782	PPTC7	Bos taurus PTC7 protein phosphatase homolog (PPTC7), mRNA [NM_001192610]	TCACCTTTTGCACAGTTTGCATGTGACAACGGATTGAATGTGAGAGGTGGAAAGCCAGAT
A_73_119851|522230	0.0233	0.002599	up	2.18526	2.18526	1.1278	NDUFAF5	Bos taurus NADH:ubiquinone oxidoreductase complex assembly factor 5 (NDUFAF5), mRNA [NM_001206395]	GGCAACAGTATCGTTTGGAGAGCTCGGAAAAATAAACGATCTTATGTCACAAGGGAAGAA
A_73_P039411,A_73_P116001|615926	0.0271139	0.00393077	up	2.18507	2.18507	1.12768	GULP1	Bos taurus GULP, engulfment adaptor PTB domain containing 1 (GULP1), mRNA [NM_001079509]	AATGCAAAGTTTCTTGGCAGCACAGAAGTAGAGCAGCCCAAAGGAACAGAAGTTGTAAGA///ATACTTAACTTCACAAATAGATTCTTCCTGTCATGAGAATATGCTTCAGGATTTCATCCC
A_73_P421226,A_73_P508073,A_73_P031291|515755	0.0155841	0.000157505	up	2.18312	2.18312	1.12639	LOC515755	Bos taurus solute carrier family 6 (neurotransmitter transporter, glycine), member 9 (SLC6A9), mRNA [NM_001102032]	AGGCCTATGAGGACGAGTCAGAGAATGGTTTTATGCCCGACGAGGACCACAGCCTCCAAC///AGCAGAGGCCCATGACCTAACAACCTGCCCAAAGAATTCGTTTCTGGGGGGTGATGCTCA///CCATCTGCGTACCACTAGGATTTTAAAGTCCATAGGTTTTAATGAAATTTCTATTCCTGT
A_73_109583	0.0302276	0.00497208	up	2.18189	2.18189	1.12558		1183881 MARC 7BOV Bos taurus cDNA 5', mRNA sequence [DN283662]	ACTCCTGACAGAAACTGTAAGGAAACCAGCTGAATGTTTGACCTGATGACTGATGTTGTA
DCP_1_0	0.0247249	0.00309827	up	2.18036	2.18036	1.12457		Unknown
A_73_112965	0.016629	0.00065239	up	2.18005	2.18005	1.12436		Rep: MGC148774 protein - Bos taurus (Bovine), complete [TC396507]	CCTCTTTTTTAGAGTGTATTTCCCAAAAAAGTATCCTTGGTGAAGTTTTGCTTGTTTTCC
A_73_100836,A_73_P070011|386587	0.0184395	0.00107485	up	2.17905	2.17905	1.1237	GDNF	Bos taurus glial cell derived neurotrophic factor (GDNF), mRNA [NM_001192849]///PREDICTED: Bos taurus glial cell derived neurotrophic factor (GDNF), transcript variant X2, mRNA [XM_005221583]	GTGTTGCAGACCCATCGCCTTTGATGACGACCTGTCCTTTTTAGATGATAACCTGGTTTA///ACTCTAAGATGAAGTTATGGGATGTCGTGGCTGTCTGCCTGGTGCTGCTCCACACCGCGT
A_73_P100016,A_73_P047296|281496	0.015973	0.000340194	up	2.16994	2.16994	1.11766	SOD2	Bos taurus superoxide dismutase 2, mitochondrial (SOD2), mRNA [NM_201527]	TTGACGTGTGGGAGCATGCTTATTACCTTCAGTATAAAAATGTCAGGCCCGATTATCTGA///CACCCCGTGGTCTTTAATTATTTTCTGATCACATGTTACATAGGGTAAACACTAACCATT
A_73_P491438	0.0230447	0.00247821	up	2.16904	2.16904	1.11706		Rep: Ferritin heavy chain - Trichosurus vulpecula (Brush-tailed possum), partial (67%) [TC440418]	AGAAGGCGGTCTGGCAGAGTACGCTTTTGACAAGCTCACCCTGGACACCAGTGACAAGGA
A_73_111705	0.0166838	0.000697124	up	2.16868	2.16868	1.11682		Rep: NADPH:quinone reductase - Rhodococcus sp. (strain RHA1), partial (6%) [TC400492]	AGAACATTGGACTACCACCCAAAATGTTGCCAGAGTCCAGATGGAACTGTGCCCATTAAA
A_73_112373,A_73_P287731,A_73_P039041|281986	0.0229586	0.00244157	up	2.16822	2.16822	1.11651	PLCD1	Bos taurus phospholipase C delta 1 (PLCD1), mRNA [NM_001081576]	ACACTGCAGCCCTCTCTCCATCCTCCGGCTGGGCCCTGGGCTGAGGGTTTTTATAAAAAT///AGCTTCAAAGAGCTACAAAACTTTCTGAAGGAGCTCAACATCCAGGTGGACGACAGCTAT///AAAGTCAACAAGAATAAGAATTCAATCGTGGACCCCAAGGTGACAGTGGAGATCCATGGC
A_73_P103656|100847786	0.0264233	0.00371729	up	2.16719	2.16719	1.11582	C17H4orf51	PREDICTED: Bos taurus chromosome 17 open reading frame, human C4orf51 (C17H4orf51), transcript variant X1, mRNA [XM_015467014]	GGCCAGCATTATGGGCATTTGCTTTCTTAGTGAATTTTAATTACTTGCAAAATAAACCTC
A_73_106200,A_73_P458621|516921	0.0245081	0.00303184	up	2.16703	2.16703	1.11572	EML6	Bos taurus echinoderm microtubule associated protein like 6 (EML6), mRNA [NM_001192457]	GACAGCAGATTCTTAGCCGTTGGTTCTTCTGAACACACAGTTGACTTCTATGACCTCACT///TGCTATGTATGCATTGGATAAGGGTTTTGTAACAGGTGGAAAGGATGGAATTGTGGAGCT
A_73_106286|507858	0.0415978	0.00960056	up	2.16664	2.16664	1.11546	SQOR	Bos taurus sulfide quinone reductase-like (yeast) (SQRDL), mRNA [NM_001040511]	TCCAGGCAGCTCCCATGCAGGCTGCTCAGGACAAGCTTAATTATTTGGAAACATTCAAAT
A_73_102526	0.0198688	0.00148524	up	2.16583	2.16583	1.11492		Rep: Reverse transcriptase-like - Bos taurus (Bovine), partial (8%) [TC448453]	TTAAAGACCGGAAATGCTGGTCATCTTAGTTTTTTGTCTGGTGCTTTCTGTATAATGATG
A_73_P382172,A_73_101515,A_73_P041111,A_73_P328381,A_73_P254481|527214	0.0155841	0.000258746	up	2.16397	2.16397	1.11368	PLA2G12A	Bos taurus phospholipase A2 group XIIA (PLA2G12A), mRNA [NM_001098063]	AAGAATGGTTTCCAGTGGCATGTAGAAACCAAGATCTGGACAGTGGATAGCTTGTTTCTA///AACGCGGCGCGTGGTAAGGGGGGCATTTTTTAAAGAAAGAGTATGACTCAGTTTTCACAA///CCTCCCACCAAACAGAGCTAGGAAATATATGTATACTAACCAATGTACATATCTGTAATT///AGGTTTACCAAAAAGTTGCAAAGATAGTATAGAGGCTTCTCATATACACTTTATCCCTGA///ATTAAAGCTTCAAGCTACAGAGACAAATGCAGGTTATCTTCCCAGACGTTGCTGCCTTAG
A_73_P412506,A_73_P066971|532896	0.0176775	0.000910712	up	2.16365	2.16365	1.11347	IRX5	Bos taurus iroquois homeobox 5 (IRX5), mRNA [NM_001192744]	CTCCACACACCCACAGAAATGTCTTAACCAACTGAAAAGAAAAATTCTAAAAAGGATTTG///CAGCTAGACCTGTGCAAAGACTCTCCCTATGAATTGAAGAAAGGTATGTCCGACATTTAA
A_73_P051691,A_73_101031,A_73_P418421|615215	0.0225674	0.00234965	up	2.16263	2.16263	1.11279	MAPKAPK3	Bos taurus mitogen-activated protein kinase-activated protein kinase 3 (MAPKAPK3), mRNA [NM_001034779]	TGTCAGGGAGGACAACACTGCTGGGTTTTATATCCAGGTATTAATAAAGAGCATTTTGGC///GGGAGGACAACACTGCTGGGTTTTATATCCAGGTATTAATAAAGAGCATTTTGGCATTTT///ATGAGAATATGCATCACAGCAAACGCTGTCTCCTCATCATCATGGAATGCATGGAAGGTG
A_73_P458316,A_73_113716,A_73_P390271|100124521	0.016629	0.000677538	up	2.16066	2.16066	1.11147	SLC25A37	Bos taurus solute carrier family 25 member 37 (SLC25A37), mRNA [NM_001102555]	TCTTCAAGTACTTCCTCACCAAACACAAGCTGGAGAATCGAACTCCCTACTAAAGGAACG///AGAAATGTGTGATTCTGTGTGGGGATGTTTCTGATGTGCTGCTACAGTTGTGACACTGGA///TGTTTTCTGAAATGGCACATCTGAGCCAGATTATCCCTGGGAGCAAATGCAAGCCTGTTT
A_73_111122	0.0411577	0.00944142	up	2.16053	2.16053	1.11138		Rep: Myosin heavy chain-like protein - Oryza sativa subsp. japonica (Rice), partial (5%) [TC478356]	CCAACAGAATCTTCCTGTCTCCCTACCTTCCGACTCTTCTTGTTTAATAAAAATTAGCAA
A_73_P132521	0.0276028	0.0041149	up	2.15964	2.15964	1.11079		Rep: Solute carrier organic anion transporter family member 4A1 (Solute carrier family 21 member 12) (Sodium-independent organic anion transporter E) (Organic anion-transporting polypeptide E) (OATP-E) (Colon organic anion transporter) (Organic anion transport - Canis familiaris, partial (47%) [TC452938]	CCACGTGTCGAAGCCTCAAGGGCACCGAGGAGGAAGAATGCAAGATGCATCCAAGTGGAA
A_73_P096141|508864	0.0361738	0.00730441	up	2.15745	2.15745	1.10933	ZBTB20	zinc finger and BTB domain containing 20 [Source:HGNC Symbol;Acc:HGNC:13503] [ENSBTAT00000015819]	AAGTTTGACCAAATCGAGCAGTTCAACGACCACATGAGGATGCACGTGTCTGATGGATAA
A_73_P449546,A_73_107671,A_73_P128096|616503	0.0201342	0.00161984	up	2.15735	2.15735	1.10926	RRAS	Bos taurus related RAS viral (r-ras) oncogene homolog (RRAS), mRNA [NM_001038688]	CCGGGTCACTGCTGTATATAACTCCCCTCCCCAGAGAAATAAACGTCACCGCCTAAAAAA///GGGCACCCGGGTCACTGCTGTATATAACTCCCCTCCCCAGAGAAATAAACGTCACTGCCA///TACTTCGAAGCTTCTGCCAAACTGCGCCTCAACGTGGATGAAGCCTTCGAGCAGCTGGTG
A_73_111100,A_73_P376316,A_73_P083661,A_73_P161567|520750	0.0230458	0.00249819	up	2.15681	2.15681	1.1089	CILP2	Bos taurus cartilage intermediate layer protein 2 (CILP2), mRNA [NM_001192528]	TGTTTGGTGCTTGGAGATTCTCTAGGGGGTTGAGGCAGGGATTCAATTAAAGATGCTTCA///TGGTCGCTAAACCCTGACACGGGCCTGTGGGAAGAAAAGAGCGGCTTCCAGCGCGAGAGA///TGAAGATCCAAGGACCCCAGGAGTACATGGTCCGCTCCCATAATTTGGGAGGCAGCCATC///TTTGTTCTTGGGGTTATTTATTGGAACAAAGCCTGCAAGACTGTCCACAGGTGTGAGTGG
A_73_120710,A_73_P100726|281743	0.0213372	0.00199554	up	2.1564	2.1564	1.10862	EBD	Bos taurus enteric beta-defensin (EBD), mRNA [NM_175703]	CTGTTTCACGCCCTCAGTAAAATGCTGCAGGTGGAGGTAAAAGAAGGAGAAGATGCGGCC///GACAGAAACTGCGGCCTTCGACAGAAAGTCTAAAATTTAAACCAGAATAAATTTTGTTCA
A_73_118274|282211	0.025577	0.00341304	up	2.15505	2.15505	1.10772	CYP2D14	Bos taurus cytochrome P450, family 2, subfamily D, polypeptide 6 (CYP2D14), mRNA [NM_174529]	AGGCATCCAGCCCCCAGCCGCTCCTCAGCCGTAGGCCTGATGGTCAATAAACCAGTGTCT
A_73_P140461	0.027266	0.00399603	up	2.15504	2.15504	1.10771		Rep: ProSAPiP1 protein - Rattus norvegicus, partial (12%) [TC459795]	GACAGCTTTGATTTATTTTTGATGCCCCCTTTTGGCCATGTAAACTATTTCTGGTAATTT
A_73_115605|767985	0.0343814	0.0065945	up	2.15448	2.15448	1.10734	CKS2	Bos taurus CDC28 protein kinase regulatory subunit 2 (CKS2), mRNA [NM_001113319]	CCTGTGCATGAGCTGTATTCTTCACAGCAACAGAGCTCAGTTAAATGCAACTGCAAGTAG
A_73_116221|540142	0.0454338	0.011314	up	2.15415	2.15415	1.10712	FOXS1	Bos taurus forkhead box S1 (FOXS1), mRNA [NM_001099716]	AGGGCCCCCTGGGGATTTACTCTGTGGCTCTCAGGGCCAATAAAGCCAGTGTGATGATGA
A_73_P053841,A_73_P113586,A_73_P070426|537817	0.014751	2.64807e-05	up	2.15123	2.15123	1.10516	TBC1D9	TBC1 domain family member 9 [Source:HGNC Symbol;Acc:HGNC:21710] [ENSBTAT00000029790]	TGAATCAGGGGCAATTTATCGAGCTTTGTAAGACGATGTACAACATGTTCAGCGAGGACC///TTCTTCTATGAAGGAATCAAAGTGATATTCCAGTTGGCCCTGGCTGTGCTCGATGCAAAC///ATTCCAGTTATTAGATGAGAATGGAGACTCTCTGATCAACTTCCGAGAGTTTGTCTCGGG
A_73_P354381,A_73_P390616,A_73_116873|513195	0.0161901	0.000509177	up	2.15047	2.15047	1.10465	CENPT	Bos taurus centromere protein T (CENPT), mRNA [NM_001101969]	ACAAGGCTGGACTGAACCACTACGCAAAACTCTTTAACTTCTATGCTAAGATGCCCATGG///AACATCATACTAACTGCTCCAGAATCTTCCATTGTAATGCCAGAGGCTGTGGTGAAGCTG///TGGGGTTGCTTGGCGCCACATACACTTCTAGGTTTCCTCCCCACCCCTCAGCATCAATAA
A_73_107435|282127	0.0155841	0.000212124	up	2.14974	2.14974	1.10416	ZFP36	Bos taurus ZFP36 ring finger protein (ZFP36), mRNA [NM_174493]	CCAGTGTCTGGTGATTGGAGCCTCACCTGAAAGGGAATCCTGGTGCTCAAACTTCCCTCC
A_73_P123776	0.0163133	0.000588811	up	2.14962	2.14962	1.10408		1243236 MARC 7BOV Bos taurus cDNA 5', mRNA sequence [DN288658]	TCTACATGAGCAAAGTAGTGTTAAGATGAGCCAATGCATTTTGGAATGTTCTCATTATGT
A_73_P095696|512798	0.0270196	0.00390136	up	2.14798	2.14798	1.10298	EPHA2	Bos taurus EPH receptor A2 (EPHA2), mRNA [NM_001205731]	TTTATTTCCAGTTTTTCTTTGTTGACACCATCCTGAGGCCTCTGCTGCAGGGAGATCTTC
A_73_101547	0.0161901	0.000464019	up	2.14788	2.14788	1.10291		Rep: Acetyl-CoA carboxylase, biotin carboxylase - Saccharophagus degradans (strain 2-40 / ATCC 43961 / DSM 17024), partial (4%) [TC401149]	TGTTATATTTCCCAAAAATGTCTTGGTCACTAAGCAAAGCTGCTAGTGGGATTCTGTATT
A_73_109101	0.043025	0.0102809	up	2.14729	2.14729	1.10252		Rep: Ethanolaminephosphotransferase 1 - Bos taurus (Bovine), complete [TC395959]	AAGCTATCAGTACCCCAAATCTAATATAGGGAAAAGATAAGAGCAAGTCACTTTCAGCAA
A_73_P035661,A_73_P346536|785824	0.0155841	0.000217365	up	2.14706	2.14706	1.10236	MGC127055	Bos taurus uncharacterized LOC785824 (MGC127055), mRNA [NM_001080364]	ACAGAAGGCCTTCATGACCCTGGTTGATGAGCTGATCGCTGAGCAGAAGATGACCCGGGA///CAACCTGCTCCTCAGCCGTAGCCCTGATGGTCAATAAACCGGGGTCTGGTGGTTCAAAAA
A_73_103677|523578	0.0198688	0.0014908	up	2.14467	2.14467	1.10076	MOSPD1	Bos taurus motile sperm domain containing 1 (MOSPD1), mRNA [NM_001038137]	TAACCATTTGGGGAGCATAAATCATTAAATGGATCATGTCTGTACATTGTGTAATGACTG
A_73_P060281|782444	0.0325432	0.00589776	up	2.14174	2.14174	1.09878	TRIM8	Bos taurus tripartite motif containing 8 (TRIM8), mRNA [NM_001191476]	AGACAGAGGACGTCAGCTTCATGAAGAACACCAAGTCTGTGAAAATCCTAATGGACAGGA
A_73_104216|537926	0.0161901	0.000464219	up	2.14132	2.14132	1.0985	CEP78	centrosomal protein 78 [Source:HGNC Symbol;Acc:HGNC:25740] [ENSBTAT00000036653]	TGATTTTGAATTTCAAGAAAGCATCCATACTCTATCACGCCTGACATAGGTCTAAATCTT
A_73_105396|317756	0.0159636	0.00032387	up	2.14068	2.14068	1.09807	GPBAR1	Bos taurus G protein-coupled bile acid receptor 1 (GPBAR1), mRNA [NM_175049]	CAGTCCTGGTCCCAGCACCGCCTACCATACCAGCAGCCAAAGCAGCGTGGACCTTGACTT
A_73_P063136|526949	0.0284973	0.00440981	up	2.13852	2.13852	1.09661	OXSR1	Bos taurus oxidative stress responsive 1 (OXSR1), mRNA [NM_001075892]	AGGTTCACAAGAAACCAAGATCCCAATCAGTCTAGTACTAAGATTACGGAATTCAAAAAA
A_73_P382521,A_73_103443|504652	0.0219821	0.00216002	up	2.13804	2.13804	1.09629	TK1	Bos taurus thymidine kinase 1 (TK1), mRNA [NM_001097572]	ATCGGAGGAGCAGACAAGTACCACTCCGTGTGCCGCCTATGCTAATTCAAGAAGGCCTCG///GCTTGTCTTCTAAGGAGGTGGGGGCTGTGTGTGTGTGTGGAACTGGTAACTAATATTAAA
A_73_P076091,A_73_P274781,A_73_P274466,A_73_P057781,A_73_102581|539563	0.0162642	0.000558899	up	2.1369	2.1369	1.09552	MARK1	Bos taurus MAP/microtubule affinity-regulating kinase 1 (MARK1), mRNA [NM_001192275]	TCCGGGACGTCTATTGCCTTTAAAAACATTGCATCTAATATAGCAAATGAGCTTAAGCTG///GTGCACACTGAAATTTTACTTGAACAGTTCTCATAATAAAGCACTTGTCTTTTGCTCCTT///TTCCGGCCATCCTATTAAAGTCACACTGCCAACCATTAAAGACAGCTCTGAAGCTTACAG///ATGCCTAATGTGATTGGCCTGTGAATCTCCCCATGTAGAATTTGCCCTTATTGCAATAAG///TCACTGGTGCACACTGAAATTTTACTTGAACAGTTCTCATAATAAAGCACTTGTCTTTTG
A_73_120469|536469	0.0362041	0.00731775	up	2.13604	2.13604	1.09494	WDR7	Bos taurus WD repeat domain 7 (WDR7), mRNA [NM_001206098]	CTCCAACCGCAACGTCATCCTCATGGCGCACGACGGCAAGGAGCACCGCTTCATGGTCTA
A_73_P104731,A_73_P043076,A_73_P384106|784133	0.0280617	0.00427408	up	2.13604	2.13604	1.09494	RAP2B	Bos taurus RAP2B, member of RAS oncogene family (RAP2B), mRNA [NM_001102531]	AGCATGTACGTTTCTCATTGATTTTGGTTGACGCATATTTCCCCATTGAAGCAGCCCGTG///GGATGGCAGGGCAAAAGATTCTAATATGCTCTTACTGAGTACTGTAAAATAAAAGCTTTT///GAGCCAAAAGAAGTTAAAGGCCACAGGTTTCTTAAAGCTGTATTAACATATTTTGCCTTA
A_73_P494223	0.018953	0.00119709	up	2.13461	2.13461	1.09398		Rep: MGC152498 protein - Bos taurus (Bovine), complete [TC392245]	TCTGGTTCTCTGCACCTCATGTTCTCGAGACTCTGGTTCAATAAATATGAGCTGATTCAC
A_73_109494,A_73_P191402|538437	0.0282925	0.00435152	up	2.13384	2.13384	1.09345	GEM	Bos taurus GTP binding protein overexpressed in skeletal muscle (GEM), transcript variant 1, mRNA [NM_001083732]	AAACACAAAACATAAATACTTCCAGCATTTTGGGTTGACCGTTGTATGCCGCAGCTCTGC///TATGAACCAACACTGATGGTTGATGGGGAAATTGCAACAATTATCCTCCTGGACATGTGG
A_73_P368731,A_73_P045926|327671	0.0429085	0.0102021	up	2.13372	2.13372	1.09337	RAC2	Bos taurus ras-related C3 botulinum toxin substrate 2 (rho family, small GTP binding protein Rac2) (RAC2), mRNA [NM_175792]	GCAGACGGACGTCTTCCTCATCTGCTTCTCCCTTGTCAGCCCAGCCTCCTATGAGAATGT///TTGCCATTGCAAACAGAAACCCAATAGAAACCCTGCTTAAGCAGAAAATAAATGTATTGT
A_73_103516	0.0275508	0.00409143	up	2.13254	2.13254	1.09257		Rep: PP4377 - Homo sapiens (Human), partial (66%) [TC417834]	GTGTCCCCGCGTATTTATTTGTTGTAAATATTTGAGTATTTTTATATTGACAAATAAAAT
A_73_105169,A_73_P113151,A_73_P206337|528410	0.0161901	0.000484082	up	2.13202	2.13202	1.09222	WIPI1	Bos taurus WD repeat domain, phosphoinositide interacting 1 (WIPI1), mRNA [NM_001099040]	GCAAAAGGTGTTTGCAGTGACCAGAATAAATCATTTATGACCTTTCAGTCCCATTTAGGA///TTCACAACATCAAGGACATGAAGCTTCTGAAAACCATCCTGGATATTCCCGCAAACCCGA///ACAACCTGGACCCTCAGGACGGAGGAGACTGTGTCCTAATCAAGACCCACAGCTTGCTTG
A_73_109217,A_73_P321081,A_73_P269921,A_73_P347211,A_73_P065311|516318	0.016629	0.000688803	up	2.13179	2.13179	1.09207	PER1	Bos taurus period circadian clock 1 (PER1), mRNA [NM_001289772]	CAGGTGTTCTCAGCTGTACCCTCTACCGATGGCATTTGTGTTTTTGATATCGTGTCTGTT///TGACCAGCGTGTCATGATGACTTATCAGGTGCCCTCCAGGGACATGGCCTCTGTGCTGAA///TGTCATGATGACTTATCAGGTGCCCTCCAGCAGGGACATGGCCTCTGTGCTGAAGCAGGA///AAGATGCAGCTCCCCACTCCAGCTAAACCTGCTGCAGCTTGAGGAGGCCCCTCGAGGTGA///GCTCACCCAGTCCAGCCTTACCTGCCACAGAAAATGGCACCAGCTAGACTCCATTTTGGG
A_73_P287146	0.0444429	0.0108613	up	2.13064	2.13064	1.09129		PREDICTED: Bos taurus protein kinase, AMP-activated, gamma 2 non-catalytic subunit (PRKAG2), mRNA [XM_002704191]	TTTGCCATGCCGCTCCTGGATGGAGACCTGGAGAGTTCAGAAAAGCCTCCGTCTCGTAAG
A_73_P162937|614734	0.049778	0.0133072	up	2.12992	2.12992	1.0908	TMEM241	PREDICTED: Bos taurus chromosome 24 open reading frame, human C18orf45 (C24H18orf45), mRNA [XM_866321]	GTGATCACGTCTGGCTTATCGATGTTGCTGTTTGATACAATTCTGACCAGGGAAACCATG
A_73_P281601,A_73_P035491,A_73_P088351|534697	0.0275978	0.00410806	up	2.12759	2.12759	1.08922	KLHL7	Bos taurus kelch like family member 7 (KLHL7), mRNA [NM_001076037]	ACTGTCCTGAATTGAAAGCAACTGCGGATGACTTTATTCATCAGCATTTTACTGAAGTTT///CATTATGAAATGTATGGAATGAGCCATGTAAAGCTGTCACCATCAATGTTTTTAAACCTG///ACATGACTACCGCATAGCCCTGTTTGGAGGCTCCCAACCACAGTCTTGTAGATATTTTAA
A_73_106549	0.0195862	0.00137048	up	2.12719	2.12719	1.08895		Rep: Telomeric repeat binding factor (NIMA-interacting) 1 - Bos taurus (Bovine), complete [TC393537]	TTGTTTTTCTTATTAAAGTTTTATACATTACTTTCTCATTGTTCCTGAGTTTGTTGTCTT
A_73_P254001,A_73_P042826,A_73_P092821|281476	0.0176213	0.000901784	up	2.12712	2.12712	1.0889	SARS	Bos taurus seryl-tRNA synthetase (SARS), mRNA [NM_174175]	ATCGTGAATATCGTCTCAGGTTCTTTGAATCATGCTGCCAGTAAGAAGCTTGACCTGGAG///ACTCAAAGGGAACCATCTGCCACATACAGTGTGACGTTCTCTTTTCTCATTTGGGCATAG///TTCGGGCAGACAACTTGAACAAGCTGAAGAACCTATGCAGCAAGACAATTGGAGAGAAAA
A_73_P046301,A_73_102382,A_73_P404139|768016	0.0155841	0.0002807	up	2.12669	2.12669	1.08861	TOB1	Bos taurus transducer of ERBB2, 1 (TOB1), transcript variant 1, mRNA [NM_001077075]	AATTTTAGCTTAAATAACATGCAGTATTCTAACCAGCAATTCCAGCCTGTTATGGCTAAC///AAATGGTATAAAAGTATTTTGAGTCAGTGTCTTACATGTTAAGAGGGACTGAAATAGTTT///AATTTGTTTTTCTGCCACAAACTGAACTTTTTTGTGTGTGTCTAGGGGGGAATTGAAACA
A_73_P037566,A_73_100521|616641	0.0327034	0.00595162	up	2.12344	2.12344	1.0864	TMEM55A	Bos taurus transmembrane protein 55A (TMEM55A), mRNA [NM_001040594]///Rep: Transmembrane protein 55A - Bos taurus (Bovine), partial (98%) [TC440371]	GAGGGTATCTAGCAGTTCTTGATAAGCTACTCTGGACATCTTTAAATCATTTACCTAATG///GTTTAGTGTACCTTCAAAGACTTGACATTCTTGTCAGATAAAGACCATTTCTAGATACTG
A_73_120389|529404	0.0381042	0.00809061	up	2.12162	2.12162	1.08516	CCDC50	Bos taurus coiled-coil domain containing 50 (CCDC50), mRNA [NM_001038147]	AGCAATTAGGATTTTGTGGAGGTAATGATCAAAGTAAAACAATGTTTGGATGCAATGCAG
A_73_P384796,A_73_110265|281905	0.0170101	0.000746238	up	2.12153	2.12153	1.0851	LTBP2	Bos taurus latent transforming growth factor beta binding protein 2 (LTBP2), mRNA [NM_174385]	TGGATGTGAATGAGTGTGATGACCTGAATGGGCCTGCTGCGCTCTGTGTCCATGGGCACT///GTAAGAGACGCATATGAAGGGGAGCAAGGAGCCTGAGAGAGCAGCAACAGGACAATATTT
A_73_117442,A_73_P133201|514066	0.0330519	0.00606533	up	2.12004	2.12004	1.08409	FBP2	Bos taurus fructose-bisphosphatase 2 (FBP2), mRNA [NM_001046164]	TGCTCATGACAGGTCTAGAAACCAGAGGCGAGTTTGTGCTCAATGTAAAGGGCTGAAAAT///ATTTTGATGCTGCCACCACAGAATATGTGCAGAAAAAGAAGTTTCCTGAGGACGGCAGTG
A_73_P333571,A_73_P460191,A_73_P304841,A_73_113539|512676	0.016629	0.00065701	up	2.11931	2.11931	1.08359	HACL1	Bos taurus 2-hydroxyacyl-CoA lyase 1 (HACL1), mRNA [NM_001098949]	CCGGTCTAATCTGTAAAGATGCCAATGAATGACTTGAAGAGTTTTCTCTTTCCTATAAGA///ATCTATTATCGAAAAGGCAGTGAGGAGCAGTATTTATGGTCGTCCAGGCGCTTGCTATGT///TTGGAGGCAAAGGGTATTTTGTACAAACACCAGAAGAACTCCAGAAATCCCTGAGGCAGA///AAAGCCCAGGATTTTCACTGGCTGACCCGGTCTAATCTGTAAAGATGCCAATGAATGACT
A_73_119039	0.0200172	0.00155095	up	2.11896	2.11896	1.08336		Rep: N-acetyltransferase 6 (EC 2.3.1.-) (Fus-2 protein) (Fusion 2 protein). - Canis familiaris, partial (76%) [TC464828]	CTGAGTGCCAGTGGAGATGGCACCATGGCTGTGGCTCAGAGCTCTGTGTGGCTGAATAAA
A_73_100106|782170	0.0198688	0.00148357	up	2.11735	2.11735	1.08226	TWIST1	Bos taurus twist family bHLH transcription factor 1 (TWIST1), mRNA [NM_001191145]	GGTAACGGTCAGAGGGATTTTAAGAACACCTTTAGAAATAAAAATATTGGGATCAAACTG
A_73_P454051,A_73_102000|616613	0.0429582	0.0102308	up	2.11729	2.11729	1.08222	FAM216A	Bos taurus family with sequence similarity 216 member A (FAM216A), mRNA [NM_001035480]	AGGAGATGCCCAACCACGGTCCAGTGTCCGACTGGACGGAATGCAGTTCTTCCGCAGAGC///ATGTGCCAAAGGTGGGGGAAGGGATTGTGAATTGTGTCCTCTCTCTACATTTAAGACAGA
A_73_114477	0.0161901	0.000476359	up	2.11153	2.11153	1.07829		HW_Fat_70_050831_E01 Bos taurus CF-24-HW fat cDNA library Bos taurus cDNA, mRNA sequence [DV776422]	CCTCCTCCTATGAAGCTACCTTTAAAATAGTCTGAATAGTAGCATTCAGACTCTGCATTA
A_73_P056916	0.0289994	0.00457136	up	2.1092	2.1092	1.0767		GB	AGGTTTTGAAGCTGCATACAATACAAAAACCACCTCCTTCCACTTGGAGAAAGCCCCAGT
A_73_P317586,A_73_P060816|539967	0.017646	0.00090439	up	2.10597	2.10597	1.07448	SPTY2D1	Bos taurus SPT2 chromatin protein domain containing 1 (SPTY2D1), mRNA [NM_001205738]	AAGACTTCTGCTAAAGGGCCTCAGAAATCTGCTACCGAGCACAAAGCCAAAAAATCTCCT///GAAGGAATGCATACTGTCATCTATCTGCAGGCTGTCGTTAGAGCATAAAGTATTTTCACA
A_73_P489870|786089	0.0430816	0.0103057	up	2.10324	2.10324	1.07261	LOC786089	PREDICTED: Bos taurus N-acetyltransferase ESCO2 (LOC786089), transcript variant X2, mRNA [XM_015463324]	CACCAGATGGCAAGTTATTTGCAACCAACTACACACCTAATTTCCTTGTATACAATTTTA
A_73_102479,A_73_P399741|514550	0.0277192	0.00416567	up	2.10318	2.10318	1.07257	ZCWPW1	Bos taurus zinc finger CW-type and PWWP domain containing 1 (ZCWPW1), mRNA [NM_001076853]	GGTTAACTTGTTTGGTTTCTGGAGCCGATACAGTGGACCTGACAATGATGGGGAAGAAAA///AGAAAGTGCAAAAATAAGGACTGCAGCCAGAAACTGTTGGTAGCCCTGATGATGGCTCAA
A_73_P048001|507710	0.0259596	0.00353746	up	2.10312	2.10312	1.07253	TMEM92	Bos taurus transmembrane protein 92 (TMEM92), mRNA [NM_001083651]	AATTTATTGCTCTTCTACCCTTGTTCCATGTCAGCTGCTTCTCTTGTCTCAAGGGCTGGT
A_73_P090701|521057	0.026409	0.00370972	up	2.1029	2.1029	1.07238	ANKRD52	Bos taurus ankyrin repeat domain 52 (ANKRD52), mRNA [NM_001192530]	AATTTCTGCTGTATCGAGGGAAGGCAGACCTTACTGTGCTAGATGAGAACAAGAACACTG
A_73_116380	0.0273836	0.00403222	up	2.10157	2.10157	1.07147		carnosine N-methyltransferase 1 [Source:HGNC Symbol;Acc:HGNC:23435] [ENSBTAT00000010790]	CACAGCTCACAATGTAATTGATTATATTGATACAATATGGAAAATACTCAAGCCAGGTGG
A_73_116621|539838	0.049598	0.0132062	up	2.10037	2.10037	1.07064	FTMT	Bos taurus ferritin mitochondrial (FTMT), mRNA [NM_001076190]	TAGGTGACCACGTGAATAACTTGGTTAAGATGGGGGCCCCCGAGTCTGGTCTGGCAGAGT
A_73_114962|768018	0.0161901	0.000474446	up	2.0998	2.0998	1.07025	TMCO2	Bos taurus transmembrane and coiled-coil domains 2 (TMCO2), mRNA [NM_001077077]	AATGTGATGGACTCCAACCTTTTCTAGAAAAGCACTGTTTTCCTTGTGTGTGCGGTGGTG
A_73_111753|535578	0.0302886	0.0049952	up	2.09958	2.09958	1.0701	EGLN3	Bos taurus egl-9 family hypoxia inducible factor 3 (EGLN3), mRNA [NM_001101164]	TTACTGAGGACTGACCCTGCTCTGAAATCCGCTGGCCTCATTCACTTTTAGTAACAGTTT
A_73_103933	0.0248617	0.00314364	up	2.09869	2.09869	1.06949		BovGen_20487 normal cattle brain Bos taurus cDNA clone RZPDp1056J1749Q 5', mRNA sequence [CO892162]	ATGTAAATAATGAGACCCTTGAAAGGGGAATGCTGTCTGCCTGTTGTCTCACAAGGCTTG
A_73_P061511,A_73_P061507,A_73_109675|510943	0.0191802	0.00125209	up	2.09851	2.09851	1.06936	CCDC88B	Bos taurus coiled-coil domain containing 88B (CCDC88B), mRNA [NM_001192279]	AAACTCAGCTCAAGATTCCCCGTGGGGCGAAGCTCTGAATCATTCAGTCCTGGGGACACC///TGCAACCCAACGAAAGTCACAGAAGAAACTGGAAGGGGCTCCTGAAGTCCGGACCTGGGA///GGTGACCTGGGTCCATTTCTGAACCTTGGCTCAGATGTGAGGCACAGGAGAATAAAGCTG
A_73_P060516|534506	0.0381964	0.00815027	up	2.09838	2.09838	1.06928	CHST15	carbohydrate sulfotransferase 15 [Source:HGNC Symbol;Acc:HGNC:18137] [ENSBTAT00000004287]	AGGGCCAGGATACACACTACACATTCAGTTTCACAATCCTCTGTTCAGGTCACTAAACCT
A_73_P132636,A_73_P070276|617312	0.016629	0.000629958	up	2.09805	2.09805	1.06905	CEP72	centrosomal protein 72 [Source:HGNC Symbol;Acc:HGNC:25547] [ENSBTAT00000015158]	ATCTCTGGAGGAGAGCAGTAGCTTGAAGTCGCTTTTGTTGAGCATGAAGAAAGATGTGAG///CAAGAAAGCAGCTCTTTAGGGCGATTAAAGAAAATAATTTATGGTGTAACAGGCAACCTT
A_73_P291726,A_73_118295|506945	0.0164245	0.000601811	up	2.09789	2.09789	1.06894	BHLHE40	Bos taurus basic helix-loop-helix family member e40 (BHLHE40), mRNA [NM_001024929]	ACTTTTCTGACTTGTCCAGCTAGCCCTGCACCAGCTTTTCGAAATGCACTATGCTTAATC///TTTTTTCTCTAGGGAGAGGTACAGTGTTTATATTTTGGAGCCTTCCTGAAGGTGTGAAAT
A_73_P048536,A_73_102347,A_73_P264501|506970	0.0230447	0.00248535	up	2.09781	2.09781	1.06888	MCM5	Bos taurus minichromosome maintenance complex component 5 (MCM5), mRNA [NM_001075290]	ATCATCCAGGACTTCACCAAGCAGAAATACCCGGAGCACGCCATCCACAAGGTCCTGCAG///TGGTGTCTGCCCTGGCTGCAGATCCAGGAAATGTGCTTTTGGAAATTTATAGAAGTAATA///TGTCGTCTGTATTGATGAGTTTGACAAGATGCGAGAGGATGACCGTGTGGCAATTCATGA
A_73_120148	0.0225674	0.00235139	up	2.09753	2.09753	1.06869		Rep: Runt-related transcription factor 2 - Homo sapiens (Human), partial (20%) [TC444636]	GCCCAAGAGAGAGACAGTCCTAACCAGGTTTCAGATAATTTTCTATTTAAACATGTACCT
A_73_112317	0.0161901	0.000426565	up	2.09631	2.09631	1.06785		PREDICTED: Bos taurus zinc finger protein 613-like (LOC787309), miscRNA [XR_083016]	CTCAGTTCTTTGGGAAATATTTTTTGTCTGCATGGAAATCTTGTTACTTTAAGGCAAAGC
A_73_P058391,A_73_118727|521730	0.0110645	7.28487e-06	up	2.09285	2.09285	1.06547	EEF2K	Bos taurus eukaryotic elongation factor 2 kinase (EEF2K), mRNA [NM_001192542]	TTTTAACTCTTGAAAATGTCTTTGCTACCACTGGAGACACTGCAACTGTCCCCTAGGGCT///AACTGTCCCCTAGGGCTCTGGGGATTGAAAAAGCAGCCTAATGAACCAATGTATCTTTCA
A_73_P086771|540823	0.0154489	0.000118981	up	2.09209	2.09209	1.06495	ZNF367	Bos taurus zinc finger protein 367 (ZNF367), mRNA [NM_001206033]	TTCATTGGAAGCAGTTCTCACAGAAAGCACTTTCTGAATAAGACACTTGTATGGGGGAAA
A_73_P083271,A_73_116205|527786	0.0194515	0.00134313	up	2.09198	2.09198	1.06487	SLC25A25	Bos taurus solute carrier family 25 member 25 (SLC25A25), mRNA [NM_001038145]	TAGCCATCTCATTCTGTGAATGTACCAACACTACGCTGACTGAAGCCAAGCTGTGAAAAC///AACTGGAATTGGTGACAAAGCAAATTAAGAAAGAATTGGGAGTTGTCATTTAAAACAGCC
A_73_P072416,A_73_P151666,A_73_P321236|533089	0.0460754	0.011608	up	2.09191	2.09191	1.06482	CENPF	Bos taurus centromere protein F, 350/400kDa (CENPF), mRNA [NM_001256586]	ATGCAGAAGATGCTGAATTTGAGCCAGAGGGGCTTCCAGAAGTTGTAAAGAAAGGGTTTG///GTTTTTATGTGGATTCTACACTAAAAAATGCAAGTAACATTTTCTTGCAAGGGACAGCTC///CAAGTGAATAAACTTCAAGAACTCCAACTGCAACTGGAGAAAGCAAAAGTGGAATTAAAT
A_73_106599	0.0192268	0.00127071	up	2.09158	2.09158	1.06459		Rep: MGC148979 protein - Bos taurus (Bovine), complete [TC393345]	ATACACAGTAGTAGGACTCCTCTCACACATAAATACCACCAGTAAAACTGTTTTGTAAGT
A_73_P510583,A_73_113937|613948	0.0302487	0.0049834	up	2.09109	2.09109	1.06425	SLC25A40	Bos taurus solute carrier family 25, member 40 (SLC25A40), mRNA [NM_001076299]	TGCAGTTGTGTGCTGAATGATGTACAGAGTCTAAAAGAATTCCCAAGTCTTTTATACACG///GAATGGATTTTCTGGATTATTTACAGGACTGATTCCTCGTTTAATTAAAATTGCTCCTGC
A_73_104864|613556	0.0188707	0.00117969	up	2.09051	2.09051	1.06385	SLC2A13	Bos taurus solute carrier family 2 member 13 (SLC2A13), mRNA [NM_001192963]	GAGCGTTAATTGTGGGTTGTGGTCTACAAATGTTCCAACAGCTCTCAGGCATTAACACCA
A_73_P058856,A_73_110798|512290	0.0388271	0.00843004	up	2.09024	2.09024	1.06367	LMTK2	lemur tyrosine kinase 2 [Source:HGNC Symbol;Acc:HGNC:17880] [ENSBTAT00000005412]	TAAATTATTCAAGGAAAATAAGGCAGGTCAAGCTGGTGCTACCCACTAGTTTGATTTTTT///TTTGTCCAGCAAAGAGCATGTAAATGATCTGCAGACAGAACTCAGAAATGCTGGCTTTCC
A_73_121155|505158	0.0256841	0.00346233	up	2.08822	2.08822	1.06227	ICAM5	Bos taurus intercellular adhesion molecule 5 (ICAM5), mRNA [NM_001113762]	TCTATTTATTTATGTATTCAATTCTAGGGGCGTCACCCCGCATTTTCTACCCCCTCCCCC
A_73_117330,A_73_119376|536901	0.02068	0.00179254	up	2.08805	2.08805	1.06215	CDYL2	Bos taurus chromodomain Y like 2 (CDYL2), mRNA [NM_001163785]	GCTTGGTCTTAACAACCCAACCAAGTGATTTACAAAACCCAGATATTGTACATTTAGGAG///AAGCAGCTCTGGAGCTCCTCCAAAGGCCTGGATTCCCTCTTCAGCTACCTGCAGGACAAA
A_73_101455	0.016629	0.000668669	up	2.08794	2.08794	1.06208		A18631A FFB Bos taurus cDNA clone A1863 3', mRNA sequence [EE905999]	GCATGTTTGTACATGAAGTGTCACACAGTTCATTTGATTTCTAAGAAACAACCAAATTGG
A_73_115805	0.0414362	0.00954316	up	2.08665	2.08665	1.06119		Rep: DENN/MADD domain containing 1C - Canis familiaris, partial (25%) [TC457644]	CCAAGGATCTGGGAGAGACTCTGGCCCCTTGTTAATAAAGCCTCAAGAGCCCAAAGCTGG
A_73_100035,A_73_P433601,A_73_P045426|532402	0.0161901	0.000443309	up	2.08617	2.08617	1.06085	ANKRD9	Bos taurus ankyrin repeat domain 9 (ANKRD9), mRNA [NM_001102144]	CCTGGCCGCTTCCCCGAGGCCCTGGACGAGCTGCCGCTGCCGCCCTTCCTGCAGCCACTG///ACAGTGATATACCCACCTGCACGGAACTTGGTCATTGCGGTGCACTAACCAGGTGGTCGG///CGCGGCTGCAGCCGCGTGGAGGGTGGTGGCACGGCGCTGCACGTGGCCTGCGAGCTGGTG
A_73_102626|520088	0.0367415	0.00747904	up	2.08613	2.08613	1.06083	MELK	Bos taurus maternal embryonic leucine zipper kinase (MELK), mRNA [NM_001111260]	AACTGTTTACTTTCTTGGAGTCACTTCCATACATGATTGTAAGCTCTTAACTATGTCTTC
A_73_P250826,A_73_P035266|510325	0.0271665	0.00396338	up	2.08554	2.08554	1.06042	FAM214B	Bos taurus family with sequence similarity 214 member B (FAM214B), mRNA [NM_001014893]	ATTTATTCAAATTGGATTGCCTTGGTAACCTCCCAAACCTGATAATTGGCATTGCCCCCC///TCCTGAAAGCCAACTTGTGTGTGTGTATGTTTGTGTGTGTGTGTGTTGTGTGTGTGGTAT
A_73_119518|618324	0.0184584	0.00107881	up	2.08487	2.08487	1.05996	RPAIN	Bos taurus RPA interacting protein (RPAIN), mRNA [NM_001076500]	CAGTCTTGATGCATGATCTACTGTGTTGGAAGAAAGTCCCATCTTGAGAAGTGGCCTTGT
A_73_106857,A_73_P106066,A_73_P316336|282331	0.0234215	0.00266279	up	2.08318	2.08318	1.05879	PTGER4	Bos taurus prostaglandin E receptor 4 (PTGER4), mRNA [NM_174589]	TTGAGCCTGATAGTAATGTGGTTTTAAGAAGCAGTTGTGCCAACTGAAATTATTTTGGAG///TATTGAGCGCTACCTGGCCATCAACCACGCCTACTTCTACAGCCACTACGTGGACAAGCG///TCAGGACAACCTAACGTGCTGATAAATATTTTGTACTTGTGTCTTCATTAGCTGGTACTT
A_73_P123761	0.0422707	0.0098978	up	2.08307	2.08307	1.05871		Hw_Fat_23_050802_G06 Bos taurus CF-24-HW fat cDNA library Bos taurus cDNA, mRNA sequence [DV776823]	TAATCTTCCAGGTGTCTAAATCCCCAGTCTGGCTGGTGTACTGGTAATTAAACTCTGTAA
A_73_107588	0.0187002	0.00113417	up	2.08136	2.08136	1.05753		Rep: Absent in melanoma 1 protein - Homo sapiens (Human), partial (7%) [TC413887]	TCACTAACCACAGTACGGTGGGCTAAGACCGTCTAGTGTGTGTTGAATTTCTCTCTCAAA
A_73_120614	0.0203579	0.00169404	up	2.07974	2.07974	1.0564		Rep: Oxidoreductase, 2-nitropropane dioxygenase family - Pseudomonas syringae pv. tomato, partial (6%) [TC418605]	GCTCCGCTGTTTTTAAATGTGAACTTGTGCGCAAATGTGCAGATTCAATGTTCTTGTTAC
A_73_113338|515222	0.0285479	0.00442726	up	2.07958	2.07958	1.05629	CRELD2	Bos taurus cysteine rich with EGF like domains 2 (CRELD2), mRNA [NM_001046191]	AAACCTGTGTTTCTTGGTTGTTCTTAAACAGATTTGTATATTTTGATACTGTTCTTTATA
A_73_P070991	0.0471605	0.01208	up	2.07939	2.07939	1.05616		BICD family like cargo adaptor 1 [Source:HGNC Symbol;Acc:HGNC:28095] [ENSBTAT00000004815]	AACTGAACCTCTCGCAGCAGCTTGAGGCTTGGCAGGATGACATGCACAGGGTCATTGACC
A_73_P033316,A_73_P395676|539332	0.0329027	0.00602294	up	2.0779	2.0779	1.05513	CFL2	Bos taurus cofilin 2 (CFL2), mRNA [NM_001076154]	GAGATCAAACTCCCCACCCTCACAAAAATGGCCACGTTGCAATAAAAATTGTGGCATATT///CACTTGAAGGAAAACCCTTATAAAGCAAGTCAAGTGCCATCTGGATCTTAAAGAGCTTCC
A_73_P494168,A_73_P118481,A_73_P032761|768028	0.0208339	0.00185764	up	2.07728	2.07728	1.05469	BEX2	Bos taurus brain expressed X-linked 2 (BEX2), mRNA [NM_001077087]	ACCCAATCTGTAAGTTTCTATCAGCAGGAAGGTTTTAACTGTTGCATGGAGAAATGTTCA///GGTGTTAAACTTGTTTCTTGCGCGTTTCCTATTACCAGCTTCTAACTGAATGTTCTGTTT///TCTGTCAGCAGGAAGGTTTTAACTGTTGCATGGAGAAATGTTCGTTATATATTGTGAAGT
A_73_P032546|787569	0.0277377	0.0041738	up	2.07668	2.07668	1.05428	LARP6	Bos taurus La ribonucleoprotein domain family member 6 (LARP6), mRNA [NM_001099205]	TTGGCATGAAGCCACCCAAAAAGAAACCATCCAAAGAGAAGAATCAGGACGAAGAACCCA
A_73_P045256,A_73_P260271|513776	0.0196161	0.00138941	up	2.07663	2.07663	1.05425	FBXO32	Bos taurus F-box protein 32 (FBXO32), mRNA [NM_001046155]	GGGCAAAACTCGAATACAAAATAGAATGCTCTTTGTTTACAATGTGAAAATTTGTTGGGG///AAACATTAGACTAATAAGGGAGCTCCTGCAGACCCTCTACACATCCTTATGTACCCTGGT
A_73_P166687,A_73_P439231,A_73_105654|613568	0.0191802	0.00125742	up	2.07647	2.07647	1.05413	MACROD1	Hw_loin_28_050627_C12 Bos taurus CF-24-HW loin cDNA library Bos taurus cDNA, mRNA sequence [DV792576]///Bos taurus MACRO domain containing 1 (MACROD1), mRNA [NM_001046509]	TAAAAATTTTCCTCGGGGGGCCTCCTCGCGTTTTTTATAAAACAGTCTGCCTATGGAGTG///AAGATCTCCCTGTTCCGAGGTGACATCACCAAGCTGGAGGTGGATGCCATCGTCAATGCC///TGATCATCTGCGTGTTCCTGGAGAAGGACGAGAACATCTACCGAGAACGCCTCCCCCACT
A_73_P071871|784034	0.0244161	0.00300069	up	2.07606	2.07606	1.05385	C16H1orf112	chromosome 1 open reading frame 112 [Source:HGNC Symbol;Acc:HGNC:25565] [ENSBTAT00000019683]	GGTGAAGAGTTAGTGGACTAGACCATTTTGTCAACTAGGTAAATGAGTTGAATATGATAT
A_73_P077361	0.0249695	0.00318428	up	2.07553	2.07553	1.05348			TGATGAAACCTACTGCATTGAGAACGAGGCCCTTTACAACATATGTTTCCACACCCTCAG
A_73_104589|497208	0.0409795	0.00937871	up	2.07529	2.07529	1.05331	LOC497208	Rep: Dynein heavy chain - Bos taurus (Bovine), partial (4%) [TC420619]	TGCAGCTCACAGTTTCATCAAAATCCCACTGTAACTCAAAAAGCAATTTGGCTGGAGTGT
A_73_107440	0.018858	0.00116889	up	2.07482	2.07482	1.05299		Rep: Adenylate kinase isoenzyme 1 - Bos taurus (Bovine), complete [TC418387]	GCGTGTGTGTCCCCTTCTATTTATGGCACGTGTGGCTGGTTTTCCATTTACAGTCATTAT
A_73_P046416|280904	0.0170598	0.00075495	up	2.07428	2.07428	1.05261	PTN	Bos taurus pleiotrophin (PTN), mRNA [NM_173955]	ATGTAAGATCCCCTGCAACTGGAAAAAGCAATTTGGAGCGGAGTGCAAATACCAGTTCCA
A_73_P082411|100139988	0.0161901	0.00047788	up	2.07423	2.07423	1.05257	RHOQ	Bos taurus ras homolog family member Q (RHOQ), mRNA [NM_001205498]	TTCTATTCCAGTATATCCAGAGTGGTGAAATAACAAGGCCAGCCACGTAGCCAAAGGTTG
A_73_P084491,A_73_P044866|534475	0.035493	0.00701297	up	2.07389	2.07389	1.05234	RFX2	Bos taurus regulatory factor X2 (RFX2), mRNA [NM_001102172]	ACTATATTGAGAAGCTGTGGCTCTCCTTCTGGAATTCTAAATCCTCTAGCGATGGTCCCA///TTTAAAGATACGTCTGCTTTCCTGAGAGATGGTCAAGTTCATGGTTCCTGGACGGTCATG
A_73_P251776,A_73_P033501,A_73_P193947,A_73_P056356|100126815	0.0313329	0.0053754	up	2.07062	2.07062	1.05006	LOC100126815	Bos taurus MHC class I-like family A1 (LOC100126815), mRNA [NM_001111069]	CCCTGCATCATGACCTTATTCTTAAAAATGGTGATATTGCTGGAAAAATACATCTGCTAT///AATGGATACTGGACAATGGTTCATTCTAAAGGGAGGTGGATGAAAGAGAAGTGGGAGAAT///ATGAAAGAGAAGTGGGAGAATGACAGAGATGTGACGGAGTTCTTCAAGAAGGTCTCCATG///CGGGGTTCTCGCCGGTTTTGTCATAATCATCGTTTTAGCCTGTATCCATTACAAGAACAG
A_73_100802|519650	0.031223	0.00534482	up	2.07007	2.07007	1.04968	DESI2	Bos taurus desumoylating isopeptidase 2 (DESI2), mRNA [NM_001100384]	CAGAACTGTCTGTGGCAGTTGACTATCACTAGAGAAAAGTAAAAGAATAAACGTCCTTTG
A_73_103169	0.0162642	0.000548826	up	2.06905	2.06905	1.04897		Rep: Uncharacterized protein C10orf78. - Canis familiaris, partial (32%) [TC422302]	TGCCTTGTTTTCACCCATTTATCACATGTTTATCTGGATGGTATAGCAGGTATTTAAACT
A_73_110027|540701	0.0489259	0.0129004	up	2.06877	2.06877	1.04877	MEP1B	Bos taurus meprin A subunit beta (MEP1B), mRNA [NM_001144098]	ACCCACAATATATTACAACCACTTCCTCCTTCTGTAAATGGATCTTCTCTGTAAATAGCT
A_73_P036186|281356	0.036843	0.00753206	up	2.06813	2.06813	1.04833	NPPC	Bos taurus natriuretic peptide C (NPPC), mRNA [NM_174125]	AAAGGAGGCAACAAGAAGGGTTTGTCCAAGGGCTGCTTCGGCCTCAAGCTGGACAGGATC
A_73_P430726	0.0372016	0.00772427	up	2.06802	2.06802	1.04825		zinc finger SWIM-type containing 4 [Source:HGNC Symbol;Acc:HGNC:25704] [ENSBTAT00000003278]	GTGCCATAATCAACACCCTCCGGCTGCAGCAGCGACATCAGCTACAGATTTACAAGCAGC
A_73_P092046,A_73_P092041,A_73_115948|515770	0.0161901	0.000437126	up	2.0679	2.0679	1.04817	PPOX	Bos taurus protoporphyrinogen oxidase (PPOX), mRNA [NM_001192426]	TTGGTCCATCTACACAAGAACTCTATCCCCCAGTATACATTAGGCCACTGGCAAAAACTG///ATCTACACAAGAACTCTATCCCCCAGTATACATTAGGCCACTGGCAAAAACTGGAGTCAG///CACTTCTTCTTGCCCCTGGTGGCAGGGATTCTCTCACCCATGAAAATAAAAGTTGCTAAA
A_73_116739|535225	0.0366373	0.00744157	up	2.06693	2.06693	1.04749	LIMK1	Bos taurus LIM domain kinase 1 (LIMK1), mRNA [NM_001206904]	ACCCCGAATGCTTCATCTGCCTCACATGTGGAACCTTCATCGGTGACGGGGACACCTACA
A_73_P253696,A_73_P346241,A_73_P041666,A_73_P263121,A_73_P255181|538801	0.0196941	0.0014153	up	2.06688	2.06688	1.04745	SEPT4	Bos taurus septin 4 (SEPT4), mRNA [NM_001034651]	ACAGAGTGCTGGAAGCCTGTGGCCGAATACATCGACCAGCAGTTTGAGCAGTATTTCCGA///AGATGAAGGAGACCCATTAGCTGACTTTCAGCCCTGAATATTTAAACGCCGCTTCTTCGT///TTCGCCTTACATCCCTGCTGCCTCCCCAGAGACTCAGAGGAAATAAAGTTTAACAAATCT///ATGAGGACTTCAAATCACAGGACCTGGCCCTAAAGGAAAGCATCCCATTTTGCTGTCATT///GCAAGAAACGCAAAATCCGGGAGGAGATTGAGCACTTTGGAATCAAGGTCTACCAGTTCC
A_73_107637|519016	0.015973	0.000366254	up	2.06676	2.06676	1.04737	CDT1	chromatin licensing and DNA replication factor 1 [Source:HGNC Symbol;Acc:HGNC:24576] [ENSBTAT00000054406]	AGGAGGAAGCAGCTGTGCCCTCCCATGCCCCGGATCTTGTATTTGGTCTCTAGACTGTCA
A_73_112110|505049	0.043968	0.0106499	up	2.06631	2.06631	1.04706	AMY2B	Bos taurus amylase, alpha 2B (pancreatic) (AMY2B), mRNA [NM_001035016]	TGACTGGGCGTTATCTGCAACTTTGCAAACTGGTCTTCCTCCTGGTACATATTGTGATGT
A_73_P136041,A_73_P079391|528574	0.0342374	0.00653392	up	2.06621	2.06621	1.04699	RAB2B	Bos taurus RAB2B, member RAS oncogene family (RAB2B), mRNA [NM_001192665]	GAAGAAGGAGAAGCCTTTGCTCGGGAACATGGACTTATATTCATGGAAACTTCAGCCAAA///TTATTTGATGTCCACAATGAGGCAAATGGCATCAAGATTGGACCCCAGCAGTGTATTTCA
A_73_P311171,A_73_P033556,A_73_P323316,A_73_P331891|507226	0.0201908	0.00163935	up	2.06613	2.06613	1.04693	TPX2	Bos taurus TPX2, microtubule nucleation factor (TPX2), mRNA [NM_001098898]	CGAAGAACTAAAACAGCAGAAAGAAGCAGCTTGCTTCAAGGCTCGTCCAAACACTGTCAT///AGCCTCTGTATCAGCGCAGTGTAATTTCTATTGCCCTTATCCCACCTCTCTTTTTCTATT///ATTTGGAACAGAAGGAAAAGCAGCATGTAAAAATGAAAGCCAAGAGATGTGGTACTCCTG///CATAGATTCCTGGTTTGATGAGAAGGCTAATCTGGAGAATAAGTTTACTGGGAAGGATGG
A_73_118356|527641	0.0317195	0.0055584	up	2.0654	2.0654	1.04642	SYTL1	synaptotagmin like 1 [Source:HGNC Symbol;Acc:HGNC:15584] [ENSBTAT00000013544]	TGGCCCCCAGGACATAGCTGCCTTACATGCTCTACAAAACCCTTCTTTTGGGATCCCCAT
A_73_P257571,A_73_P287016,A_73_113906|510842	0.0334242	0.00623504	up	2.06489	2.06489	1.04607	LPCAT4	Bos taurus lysophosphatidylcholine acyltransferase 4 (LPCAT4), mRNA [NM_001077901]	TATTCTTTCCTGAGGGCACCTGTTCCAACAAGAAGGCTTTGCTGAAATTCAAACCAGGAG///TAGCTACTTCCAGCAGGATGCCGATGGTTTGGTGGACTTCCGAGACGTGGCCCTTGCATT///CACCCCCTGGGCCTCAAGCCCACCTCTGTCCTGCTTGACTTTTCATTATTGTCGATGATT
A_73_P265866,A_73_P032316|530719	0.0249483	0.00317774	up	2.06435	2.06435	1.04569	CAMK2A	Bos taurus calcium/calmodulin dependent protein kinase II alpha (CAMK2A), mRNA [NM_001075938]	ATACCTGTGTCAAGAAAACCTGTCCGTTCGTAAAAGCCATCATGACTTCAGAGCAGATGG///GCCTTTTTATAGCCAAACTTCTGTGTGTTTCGTAAGTGGATTTTGCGTTAATGGATATTT
A_73_P037616,A_73_P091241|541140	0.0239624	0.00285558	up	2.06392	2.06392	1.04539	KRAS	Bos taurus KRAS proto-oncogene, GTPase (KRAS), mRNA [NM_001110001]	CAAAGGTTTTCTTCTTTCCACTGCTATTTGTCAAATGGTCACGTTCCCTAAAATACTATA///GATTTGCCTTCTAGAACAGTAGACACAAAACAGGCTCAGGACTTAGCAAGAAGTTATGGA
A_73_100599,A_73_P083736,A_73_P083746|534230	0.024762	0.00311857	up	2.06341	2.06341	1.04503	MAST3	PREDICTED: Bos taurus microtubule associated serine [XM_613922]///microtubule associated serine/threonine kinase 3 [Source:HGNC Symbol;Acc:HGNC:19036] [ENSBTAT00000061185]///microtubule associated serine/threonine kinase 3 [Source:HGNC Symbol;Acc:HGNC:19036] [ENSBTAT00000036459]	TGCCTGGTGTTGGAGCTAGATCAAGGCTGTGCATGACTTTTGCTCCCGCCTTCCATCCTG///TCAAGAAGCAGGAGGCTGTGCAGGAGGTGAGCTTTGATGAGCCACTGGAAGAAGCCACTG///TCTATGAATTCCTGGTGGGCTGTGTGCCCTTCTTCGGCGATACCCCCGAGGAACTCTTTG
A_73_P263996,A_73_P438241,A_73_P343801,A_73_P391636,A_73_114802,A_73_100851|533166	0.0483206	0.0126326	up	2.06208	2.06208	1.0441	SORL1	Bos taurus sortilin-related receptor, L(DLR class) A repeats containing (SORL1), mRNA [NM_001192757]	TACAAGTGTGACCTTGAGGATGACTGTGGCGACAATAGCGATGAAAGTCACTGTGAAATG///AGATGTAACTTTGACCTGGATACGGCCCAAGAAGATGCCCTCTGCTTCTTGTGTGTATAA///CTCCAGTATCAAAATTACCACGGTTTCATTATTAGCACCTGATGCCTTAAAAATCATCAC///CCGAATCACTGGTTTATGCTGAAGATTTTACTCTATTGTCACACAGTCTTAAGATCATTT///TATGATTTCAGTTGCCTTGATAAGTTTCCGAATCACTGGTTTATGCTGAAGATTTTACTC///ACGACGTCCCCATGGTGATAGCCTGAAAGAGCTTTCCTCACTAGAAACCAAATGTTGTAA
A_73_P366691,A_73_P113661,A_73_P439601|787326	0.0278816	0.00421408	up	2.06176	2.06176	1.04388	GGT5	Bos taurus gamma-glutamyltransferase 5 (GGT5), mRNA [NM_001191219]	ATTCTCAGCTTCGTCCTCAACGTGCTCAAAGGGTTCAACTTTACCGCCGAGTCGGTGGCG///TTATCTCTGCGGTGGCTCAGGCCATCATGAACAAGCTGTGGCTGGGCTTTGACCTGCAAG///TTTGGAGCCATGGTGTACTCACCACGCACGGGCATCCTTCTCAACAACGAGCTTCTGGAC
A_73_120220,A_73_P074016|527211	0.0332021	0.00611439	up	2.06154	2.06154	1.04372	SMOX	Bos taurus spermine oxidase (SMOX), mRNA [NM_001205439]	GTGCCTTCAATACTTTGCATTTTGGGATAATAAAAGAGGCTTGCCCTTCCTGTGCTCCTC///TTGTTATTGTAAGTGCCTTCAATACTTTGCATTTTGGGATAATAAAAGAGGCTTGCCCTT
A_73_112388	0.0319239	0.00564188	up	2.06098	2.06098	1.04333		264610 MARC 3BOV Bos taurus cDNA 5', mRNA sequence [BF600126]	AGTCATCACCACCATGACCACCTTAAAGAAGAACCTGGCTGACGAGGACGCTGTGTCCTG
A_73_P054836,A_73_119253,A_73_P103596|512184	0.023534	0.00269791	up	2.05962	2.05962	1.04238	CDADC1	Bos taurus cytidine and dCMP deaminase domain containing 1 (CDADC1), mRNA [NM_001206518]	AATCCATCAAGAACTGGTGTTCTTGAGCAAAATGAGCCTGAAAGCAGAGAGAATGGCGTG///TTATTTGTATGTTTTCCAGAGTATAGTGATGTGTTCTTTTCTTACACTGAAGCAGGTGTC///TTGGTCTGTTACATGGTGCAGTTTGTAGAAGAGACCTCTTACAAATGTGACTTTATTCAA
A_73_102390	0.0371241	0.00766744	up	2.05935	2.05935	1.04219		LB02315.CR_O20 GC_BGC-23 Bos taurus cDNA clone IMAGE:8265454, mRNA sequence [EE246716]	CCCATCCCTTGTAGATTATAAATAAATACAAAACCGCCACAGAACTAGAGGTCTTCTCTT
A_73_P150506	0.0403911	0.00912111	up	2.05817	2.05817	1.04136		BovGen_24115 normal cattle brain Bos taurus cDNA clone RZPDp1056J1737Q 5', mRNA sequence [CO895790]	GCTGCTGTGATTGTCAACAGCAGCAGGATCCACTTTGAAGGTTTGATAAAAGCAGATGAA
A_73_119702|538558	0.0372319	0.00775957	up	2.05699	2.05699	1.04054	BRI3BP	Bos taurus BRI3 binding protein (BRI3BP), mRNA [NM_001099087]	TGAGAATGCCGTGCTGCCCTTGTGTTTCGTGGTGGCCATCTACTTCATGACCGGTCCCAT
A_73_P259556	0.0337054	0.00634686	up	2.05655	2.05655	1.04023		phospholipase D family member 4 [Source:HGNC Symbol;Acc:HGNC:23792] [ENSBTAT00000020166]	TCAACCGCTTCCAGCCACTCCGGGATCACTTTGACGGGGTGCCCACCACGGTCTACTTCT
A_73_P048826|505436	0.0450042	0.0111269	up	2.05517	2.05517	1.03926	CLIC3	Bos taurus chloride intracellular channel 3 (CLIC3), mRNA [NM_001100301]	CTCTTCCTGTGTCAACTGGAACAAGTCAAATACAAAACAGAATAAAGTATGGTAACCCGC
A_73_P349106,A_73_112973|509740	0.020655	0.00178278	up	2.05498	2.05498	1.03912	XAF1	Bos taurus XIAP associated factor 1 (XAF1), mRNA [NM_001035075]	AAAGGGAAGAGCATTCCAGTTCCTGAAAGCAACATCTGCTGTCATTATTGCAACCAAATG///CCAACCCAGCCTGGACACCTTGGGAAATCCAGCTTTCTCTCTGAAGAATAAAAAAGATCT
A_73_118319,A_73_P100771|282122	0.0155841	0.000211675	up	2.05419	2.05419	1.03857	VEGFC	Bos taurus vascular endothelial growth factor C (VEGFC), mRNA [NM_174488]	TGCAAAAGACCTCTTTAAAAGACTGGTTTTCTGCCAATGACCAAAAGCTGAGGTTTTCTC///ATTTTATTTTTTCCCCCAGTGCTGGAGATGACTCTGCAGACGGATTCCATGACATCTGTG
A_73_121257,A_73_P037751,A_73_P054151|286850	0.021589	0.00205605	up	2.05415	2.05415	1.03854	GNG12	Rep: Guanine nucleotide-binding protein G(I)/G(S)/G(O) subunit gamma-12 precursor - Bos taurus (Bovine), complete [TC414270]///Bos taurus G protein subunit gamma 12 (GNG12), mRNA [NM_174785]	TTCAAGGATAAGAAGACCTGCACCATCTTATAGAGAAGTAGTGAAGTGGATCCTCCCCTC///AAACCCCTTCAAGGATAAGAAGACCTGCACCATCTTATAGAGAAGTAGTGAAGTGGATCC///CTGATGGGGATACCAACTTCAGAAAACCCTTCAAGGATAAAAGACCTGCACCATCTTATA
A_73_P462616,A_73_110920,A_73_P438406|531141	0.0223165	0.00224719	up	2.05393	2.05393	1.03839	SEMA3F	semaphorin 3F [Source:HGNC Symbol;Acc:HGNC:10728] [ENSBTAT00000024362]	TAAGACCATGACCATCTCTTCCAAGAGGCAACAACTGTACGTGGCCTCAGCCGTGGGCGT///CGAGAACAACTTCAAGCACATCATCACACGGGTGCAGCTGCATGTCCTGGGCCAGGAAGA///GTCCACCAAAGACTACCCTGATGAAGTCATCAACTTCATGCGCAGCCACCCGCTCATGTA
A_73_P032096,A_73_111060|281733	0.0195854	0.00136968	up	2.0537	2.0537	1.03822	CXADR	Bos taurus coxsackie virus and adenovirus receptor (CXADR), mRNA [NM_174298]	GTAGAGTATTTTGCAGTTGCCAAGTAAATGCTGGCCCTGCGCTTTAGGTGATATTTTCCT///GTCACCCATGCTGTCCTCTGGAAATATGAACATCCGTACATTTTGCTACCAGCCTCAAAA
A_73_P030931|514161	0.0229713	0.00245165	up	2.05127	2.05127	1.03652	GMPPB	Bos taurus GDP-mannose pyrophosphorylase B (GMPPB), mRNA [NM_001046168]	TTTTTTCGTCCTGAACAGTGATGTGATCTGCGATTTCCCCTTCGAAGCCATGGTGCAATT
A_73_115285,A_73_P302791,A_73_P378391,A_73_P096801|541277	0.0163234	0.000590371	up	2.05085	2.05085	1.03622	TSC22D2	Bos taurus TSC22 domain family member 2 (TSC22D2), mRNA [NM_001144101]	TCTCCCGTGTTTCCTATTACCCATGGATTTTCCCTGAGCCTTCCTATCACATTATAAATA///CTGGTGAAAAGCCATTTGATGTATGCAGTAAGAGAAGAAGTGGAAGTTCTAAAGGAACAA///GCCTTCCTCACCATGTCCAAGATGCCGGCCAAGAAGAAGAGCTGCTTCCAGATCACCAGT///TTCTACAAGAGCTTTTCCTCTCTTTGAGATGTCATGCAGCGCTGTTGGTGTCCAGTTTCT
A_73_106078	0.0162981	0.000582916	up	2.05057	2.05057	1.03603		CR848869 Normalized and Subtracted bovine endometrium tissues (bcbp) Bos taurus cDNA clone bcbp0001.m.21 5', mRNA sequence [CR848869]	GTGTGAGTATATATTTGCGTTTTAAATTTCAAAGAAAGCTATATTGTCTAACAGGGGACC
A_73_P275816,A_73_P046606|535844	0.0155841	0.000180418	up	2.05034	2.05034	1.03586	OCRL	Bos taurus OCRL, inositol polyphosphate-5-phosphatase (OCRL), mRNA [NM_001102191]	CTCTTCAGTGAATAGAATGCTTTCACGTGAAAAAGAAGCTTCTAATAAGGAACCCCCCAA///TGCAAAACTGCCTGATGTAATTGACTTCCTCCTGGTTTTCTTTCATTAAAACCACCCTGA
A_73_109366	0.0287768	0.00448919	up	2.04952	2.04952	1.03528		397663 MARC 4BOV Bos taurus cDNA 5', mRNA sequence [BI534595]	TCACTGGCGACATGGTGACATCAAAATGTGAAGCAGAAATAGGACTCTTTCTCACAGCAA
A_73_P072541,A_73_P476493,A_73_P072536,A_73_P072546|407152	0.0244803	0.00301747	up	2.04772	2.04772	1.03402	PTPRC	Bos taurus protein tyrosine phosphatase, receptor type, C (PTPRC), mRNA [NM_001206523]	ATGATCTGCATAAGAAAAGATCCAGCAATTTAGATGAGCAGCAGGAACTCGTTGAAAGGG///CTCAAGATGGCCTCCTTGTCCTGGTGAAATACATTTTATGATTTCCTATTTTAATTCCAG///AGTACATCTTGATTCACCAGGCCTTGGTGGAGTACAATCAGTTTGGAGAGACAGAAGTGA///TCTATCATCCAGCAAGAAGCAGCTTGTTTGTAGTCTTTGTGTGTGTGTGTGTGTGTGTGA
A_73_104219,A_73_P348951,A_73_P129261|504230	0.0427034	0.0100803	up	2.04729	2.04729	1.03372	RAMP2	Bos taurus receptor activity modifying protein 2 (RAMP2), mRNA [NM_001098860]///Hw_loin_36_050706_A05 Bos taurus CF-24-HW loin cDNA library Bos taurus cDNA, mRNA sequence [DV798352]	AGATTCTTAGATTGGTGGAAATGGAAGCTGGGTGGGGTCATCGTGCAAGTTCTGTAATCT///AAGGTTCAAATGGATTCTATCAAGAAGGACTGGTGTGATTGGGCCCTGATTAGCAGGTAG///CTCCCTAACTGAATATTCCTAGATTGGAGGAAATTGGAAATTGGTAGGAGTCAACTTGAA
A_73_P206192,A_73_P042781|535379	0.022336	0.00225621	up	2.04633	2.04633	1.03304	ABCA1	Bos taurus ATP binding cassette subfamily A member 1 (ABCA1), mRNA [NM_001024693]	TTATGACTGAGGTGAATAAGACCTTCCAGGAACTGGCTGTGTTTCATGATCTAGAAGGCA///GACGTTGCAGTCCTCACATCTTTCCTGCAGGATGAGAAAGTGAAAGAAAGTTATGTATGA
A_73_P035406,A_73_P503963,A_73_P244825|617530	0.014751	4.55092e-05	up	2.04614	2.04614	1.03291	CEBPG	Bos taurus CCAAT/enhancer binding protein gamma (CEBPG), mRNA [NM_001034801]	GCCCTGAAGAGCTGATTAGCTAAAAATGTTAGACGTGTAACTTGAATATCTGGTTTTAAA///TACTGAAAGATTTGTTTCTTGAGCACGCACACAACCTCGCAGATAACGTGCAACCCAGTA///ATAACGTGCAACCCAGTAGCACTGAAAATACGACAAATCCTGACAAGGCAGGACAGTAGA
A_73_100721	0.0488726	0.0128718	up	2.04603	2.04603	1.03283		leucine rich repeat LGI family member 3 [Source:HGNC Symbol;Acc:HGNC:18711] [ENSBTAT00000006011]	TGGACAGCCAGCTGTATGTGGTGGTGGCCCAGCTGTTTGGGGGCTCTTACATTTACCACT
A_73_113799|533298	0.0256841	0.00345799	up	2.04586	2.04586	1.03271	LNPK	Bos taurus lunapark, ER junction formation factor (LNPK), mRNA [NM_001075989]	CTCTTATTTTGCAGCTGGGCCAGAGGTACCTGATGTATATAATTAGCTTATGTTTACATA
A_73_103976,A_73_P435121,A_73_P069631|511414	0.0162642	0.000545129	up	2.04544	2.04544	1.03241	PPP1R13B	protein phosphatase 1 regulatory subunit 13B [Source:HGNC Symbol;Acc:HGNC:14950] [ENSBTAT00000004631]	TCCAGCAAGCCACACCACCTAAGAATTACCAGCCAGCAGCACACAGCACCAGTGAATAAG///AACCAGCTCAACCAGGAACAGAATTCAAAGCTGCAGCAGCAGAAGGAGCTCTTGAATAAA///TTCTATACGGCGTGCAGGAGAAGCTGGGCGTGATGAACAAAGGCGTGGTGTATGCCCTGT
A_73_P205932	0.0497925	0.0133251	up	2.04536	2.04536	1.03236		Rep: Prostaglandin F synthase-like1 protein. - Bos Taurus, partial (62%) [TC462112]	GGCTTTTCTTATGATTTTCCTGTAGAAATGTGTGTGTGTGTTTTCACTTACAAAGGGAAA
A_73_112214	0.0211709	0.00193541	up	2.04455	2.04455	1.03178		PREDICTED: Bos taurus uncharacterized LOC100850521 (LOC100850521), miscRNA [XR_138720]	TGGAGGATAGAAGTAACACAAAACAAGGCAACAGTAGCTCTCCAGTGTTTAGTTCAATGT
A_73_P057046,A_73_P357341|508189	0.0256841	0.00346258	up	2.0444	2.0444	1.03168	LONRF3	Bos taurus LON peptidase N-terminal domain and ring finger 3 (LONRF3), mRNA [NM_001191134]	TCCTGAAGATGCTTCTTGACATGCTGCACAACTACATGCACAGCAGAGGTTGTTTAAGAG///CGCTCCCCCACCACTGTGGGGGAGTCATCTTGTAAATATATCTAATTGCAATAACATCTT
A_73_104338|515306	0.0249733	0.00319268	up	2.04411	2.04411	1.03147	PIGH	Bos taurus phosphatidylinositol glycan anchor biosynthesis class H (PIGH), transcript variant 1, mRNA [NM_001038116]	CTAGCTCCTGTGTTCTGTACAGGGTTACTTTATGATGATTCTCTTAATAAACAGATATTC
A_73_P257136,A_73_P426656,A_73_104448|508224	0.02025	0.00165682	up	2.04398	2.04398	1.03138	SCG5	Bos taurus secretogranin V (SCG5), mRNA [NM_001045998]	TAAAGTGAAGACTCAGTGTGGAATTCATGTGACCTGCTATCCCTCCTTGGTACTGCTTCT///AAGATAAGGACCCAGAGTAAAGTGAAGACTCAGTGTGGAATTCATGTGACCTGCTATCCC///TCTGCTTTCTGCTAGATTAGGATAAGAGCCTTTTTTCCCCTTTACATGTGGATCTGCAAT
A_73_103345	0.0200148	0.0015475	up	2.04298	2.04298	1.03068		Rep: Cell division cycle associated 5 - Bos taurus (Bovine), partial (52%) [TC430567]	CCAGATGATGTTCAGTTGATGTTGTTACTACAGACTTTTCTCTGTCCCTGAAAAACTAAG
A_73_105540,A_73_P421856,A_73_P250821|505884	0.0348602	0.00675399	up	2.04252	2.04252	1.03035	KLF6	Bos taurus Kruppel like factor 6 (KLF6), mRNA [NM_001035271]	GGTCTCATACAGGGGAATGGGTGATGCATGCTTTATTAAGGCTCTTTTTTCACCTGGCTT///ATCAAATTCGACAGCCAGGAAGATCTGTGGACCAAAATCATCTTGGCTCGGGAGAAAAAG///GGTGATGCATGCTTTATTAAGGCTCTTTTTTCACCTGGCTTTGTACTGTATCAATATTTA
A_73_P032561,A_73_P262936|616392	0.0305502	0.0050855	up	2.0424	2.0424	1.03027	TMEM206	Bos taurus transmembrane protein 206 (TMEM206), mRNA [NM_001046580]	CCATGTGCGAGTCTCTGATGCACTCACTCATGTGTTAAATATTAAATGAGACTGTTTTTT///AGAAAGTCCAGGATATAATCACCGCCAATCCTTGGAACACAATTGCTTTTCTCTGTGGGG
A_73_P070981,A_73_P412066|613372	0.017321	0.000805982	up	2.0415	2.0415	1.02963	NAA25	Bos taurus N(alpha)-acetyltransferase 25, NatB auxiliary subunit (NAA25), mRNA [NM_001206127]	GTTGACCATCATTTTAAATCCAGAACTTCCTCATAAAATGCATGAAGGACTTTGATTGTG///GGCTTCAGACTTTAATTTCCAATGGTTGTGGATCATATTAAAGGACTTGAAACACATCTA
A_73_P080901|530164	0.0234054	0.00265831	up	2.04076	2.04076	1.0291	SLC17A5	Bos taurus solute carrier family 17 member 5 (SLC17A5), mRNA [NM_001205974]	TTTTCTTCACACTATTCGCCAAAGGTGAAGTGCAAAACTGGGCTATCAGTGATCACCGAG
A_73_114033,A_73_P103726|514368	0.0155841	0.000243933	up	2.0396	2.0396	1.02829	ATP6V1G2	Bos taurus ATPase H+ transporting V1 subunit G2 (ATP6V1G2), mRNA [NM_001075664]	GTGATGTTGTGTCCTCTTGTGTGCATGACCTTCCTTTTACATCCTCAACACCATACGTTC///TGACCTTCCTTTTACATCCTCAACACCATACGTTCCCTTTGTAACAATAAAAGTGTCAAT
A_73_P459756,A_73_P071501|538754	0.0248639	0.00315029	up	2.03906	2.03906	1.0279	PPP1R15B	protein phosphatase 1 regulatory subunit 15B [Source:HGNC Symbol;Acc:HGNC:14951] [ENSBTAT00000017382]	TTTTCGGTGGGATGATCCCTACCAGATGGCTAGACTTTGCTGGAGGCTACGGCCTCCTGA///GGTGTGATTTCTAATCCTCCCTTTTTTGTTTAGTTGGATCTGTTCTAGAATGTTGTTTGC
A_73_119746,A_73_P043186|519504	0.0233148	0.0026148	up	2.03833	2.03833	1.02739	NUF2	Bos taurus NUF2, NDC80 kinetochore complex component (NUF2), mRNA [NM_001099011]	TCTTTGGCAATATAAATCTTCTGTGGACAAAATGCAGCAGTTAAATACTGCACACCAGGA///GCAGGTATTCATGTCTCTGCTCCTTTTGTAAGTAGTGGTTGAAATAAACAATTGCATTTG
A_73_106797|527708	0.0268587	0.00385579	up	2.03828	2.03828	1.02735	LRRC8C	Bos taurus leucine rich repeat containing 8 family member C (LRRC8C), mRNA [NM_001099039]	ACCCTGCCTTCTGATGTCCGGGAGCAAATGAAAACTGAATAACTTATTTTTGTTTAACGT
A_73_P035636,A_73_P205422|506412	0.0161901	0.000489089	up	2.03728	2.03728	1.02664	SAA2	Bos taurus serum amyloid A2 (SAA2), mRNA [NM_001075260]///Hw_liver_53_050812_F09 Bos taurus CF-24-HW liver cDNA library Bos taurus cDNA, mRNA sequence [DV784023]	TGATGCCAGAGAAAATATTCAGAGATTCACAGACCCTCTGTTTAAGGGTACGACCAGTGG///TTCTACTAATACTTCGCTTCCCAAGCATCCACCTCCCGTAGATATAAGGATACGCAATGA
A_73_P113431,A_73_P265641,A_73_P032841,A_73_P313606|528615	0.0338849	0.00640425	up	2.0372	2.0372	1.02659	DNAJA4	Bos taurus DnaJ heat shock protein family (Hsp40) member A4 (DNAJA4), mRNA [NM_001102120]///Rep: PDJA1 chaperone - Sus scrofa (Pig), complete [TC405334]	GGCTTCAAGAAGACGATAAAAACACTGGATGATCGAGTCCTTGTTATTACATCTAAATCA///TATCGAGGTATGAAGGATGGGCAAAAGATACTATTTCATGGAGAAGGAGATCAGGAGCCC///TGGCGGGACTAGCACATCATGAATGTAAAGTTGGCACAATGAAAAATGGCATCGCTTTAA///CGAAGCCCTTTGTGGCTTCAAGAAGACGATAAAAACACTGGATGATCGAGTCCTTGTTAT
A_73_P440026,A_73_P044436|538366	0.0161901	0.000439	up	2.0353	2.0353	1.02524	SNX18	Bos taurus sorting nexin 18 (SNX18), mRNA [NM_001083731]	GGTTGATCTAATGAGGGACCAGAAATAATTTCTACTATTCCAAATGCTGATGGAAAAAAG///CAAGAGAAAAGCCATCATAATGTGTATGCTGGTCATTTTGATCAGTGTGGTACAATTTTT
A_73_110370	0.0248636	0.0031459	up	2.03461	2.03461	1.02475		LB02723.CR_E13 GC_BGC-27 Bos taurus cDNA clone IMAGE:8314743, mRNA sequence [DV892316]	GTGGTAAACCATTAAGGTCAAGTTCATGGGCGGTGATTGAAGTGTGGTGTGAATTCTGGT
A_73_119720,A_73_P253786|613524	0.0295806	0.00474879	up	2.03341	2.03341	1.0239	PKIA	Bos taurus cAMP-dependent protein kinase inhibitor alpha (PKIA), mRNA [NM_001037620]	TGTGTAATCCCTCTGGTCAGTATTATGCAATCATTTCTCAGTGGTAATAAATAAGGCACC///ATTTTTATACCACTCATTTTTTAAAGGGCTGCCTAAAAATTCTGCTCCATAACGTGGTGG
A_73_100372	0.0161901	0.000459508	up	2.03293	2.03293	1.02356		Rep: Cell division protein kinase 2 - Bos taurus (Bovine), complete [TC466205]	TTATATTTCAGTTTATAGTAGTTTTTTAAGTGGGAATGGGTGGGGATTTGTTGCCATGTG
A_73_P288996,A_73_103530|531519	0.0223893	0.0022857	up	2.03261	2.03261	1.02333	ASGR2	Bos taurus asialoglycoprotein receptor 2 (ASGR2), mRNA [NM_001075952]	CTGACTTGTCAGATGGCACACTTCCAGAGCAATGGCACAGAATGCTGCCCAGTGAACTGG///TTTTGAAGAAAGGAAGGAGAGGAGAGTCTTTAGAAGCATGGGGAGAGCTTGAAGAGGGAT
A_73_100646|525408	0.014751	5.75064e-05	up	2.03179	2.03179	1.02275	NFKBIB	Bos taurus NFKB inhibitor beta (NFKBIB), mRNA [NM_001075872]	CTCCCACCCCAGCGTCAAAACCGCTCCCTGACGACCCCATCTGACTTAACTGTTAATAGT
A_73_P392836,A_73_101663|535171	0.0297383	0.00482815	up	2.03124	2.03124	1.02236	MPP6	membrane palmitoylated protein 6 [Source:HGNC Symbol;Acc:HGNC:18167] [ENSBTAT00000020351]	TATACTCAAAGAGCCTCACTTCCAGTCACTCTTGGAGGCCCATGATATTGTGGCATCAAA///CAGGGTCTGCTTCATGTGGGAGATATCATTAAAGAAGTCAATGGCCATGAAGTTGGAAAC
A_73_P049776,A_73_P083421,A_73_P282631|533440	0.0178544	0.000944284	up	2.03005	2.03005	1.02151	TSC1	tuberous sclerosis 1 [Source:HGNC Symbol;Acc:HGNC:12362] [ENSBTAT00000052129]///tuberous sclerosis 1 [Source:HGNC Symbol;Acc:HGNC:12362] [ENSBTAT00000006842]///Rep: Tuberous sclerosis 1 protein isoform 2 - Bos taurus (Bovine), complete [TC409301]	GCCGTCATGGAAGCATAAGCTCTCTCAAGCACCTCTTTTGCCTTCTCTACTAAAATGTCT///ACTTGAAGAACAAAAACCAGAAGCAGCTGAAGCAGCAGAAGAAAGGCTTGACTACTGTCA///AAGAGAAGAACGTGTTAGAATCCTGTTGCTGAAATGGTTGGTTGTCACCAGACAGGTGAG
A_73_P040721,A_73_P047146|777600	0.014751	5.74875e-05	up	2.02978	2.02978	1.02132	DCAF16	Bos taurus DDB1 and CUL4 associated factor 16 (DCAF16), mRNA [NM_001078147]	CAAAGGGAGGCAGTTCCCTGTCCTAGAATTAGTTTTTCTAAAATGTGAATAAACTTGTTT///ATGCCACTCTAAATGGAGCGCTGCAGTTTGCCACCAAACAGTTAAGTCGAACATTGAGTA
A_73_P336951,A_73_P082066,A_73_P311566,A_73_P475673|535487	0.0231187	0.00254143	up	2.02879	2.02879	1.02062	INPP4A	Bos taurus inositol polyphosphate-4-phosphatase, type I, 107kDa (INPP4A), mRNA [NM_001206848]	TTAAATTCCTACTTCGAGCAGTTTAAGGAAGTTCTGCCTGAGGACTGTCTACCTCGATCC///TGCCCTCTAGTCTATACATGAATTCTTCAAGAAGACCTGAAGGATTGGTTTTTACTTTTG///GGCAGATTTAGTCTTTCACTTTCACCATTTCATTGTCTGGTTAGCTCTACCTTTCCATCT///AACACTTGCCATCTTGGCAGACAAGACCCGGCAGCTGGTCACTGTGTGTGACTGCAAGCT
A_73_118320,A_73_P349171|518653	0.0453134	0.0112568	up	2.02786	2.02786	1.01996	POLE2	Bos taurus DNA polymerase epsilon 2, accessory subunit (POLE2), mRNA [NM_001105383]	TAGAAGATAGCAAACTTCAAGGGTTTTGAGATTCTTAGACCATCTGAAGAAACAGAATTC///CTTCAAGGGTTTTGAGATTCTTAGACCATCTGAAGAAACAGAATTCATCAATCATCTGCT
A_73_P071576	0.0193632	0.00131217	up	2.02759	2.02759	1.01977		mitogen-activated protein kinase-activated protein kinase 2 [Source:HGNC Symbol;Acc:HGNC:6887] [ENSBTAT00000015530]	TGGAGGACAAGCAATAACTCTCAACCTGGCTGGATTTTTTAAACAGAGAGACCCAGAGTC
A_73_112930,A_73_P269936|506415	0.0296477	0.00479538	up	2.02635	2.02635	1.01888	RSAD2	Bos taurus radical S-adenosyl methionine domain containing 2 (RSAD2), mRNA [NM_001045941]	TTCAAATGAAATATGAAGTGAATTTCTCTCAACCTGAGGGAAACTACATTTCTCTTTCCC///AGTCATCAATCGATTTCAACGTGGACGAAGATATGAAGGAACAGATAACCGCGCTCAACC
A_73_110598,A_73_P074771|523707	0.0184692	0.00108945	up	2.02621	2.02621	1.01879	NCOA3	PREDICTED: Bos taurus nuclear receptor coactivator 3 (NCOA3), transcript variant X3, mRNA [XM_010811755]///nuclear receptor coactivator 3 [Source:HGNC Symbol;Acc:HGNC:7670] [ENSBTAT00000009850]	TAACTTATGAGACAGTTGAGTGGTAAGCTATGACTCCTTTGATCATTTTGGACATCATTG///AGGAAATCACCGTACAAGACACTGCACTAGGATTACCGGGAGTAGTGAATCGTTGTTCTA
A_73_P067566,A_73_102337|510874	0.0274054	0.00404936	up	2.02604	2.02604	1.01866	FBXO17	Bos taurus F-box protein 17 (FBXO17), mRNA [NM_001103239]	TCTTTACCAACTTTGGCAAGGGTATCCGCTACGTGTCTTTTGAGCAGTATGGAAGAGACA///GTCAAAGAGTAACTCAGAGACCTGTACTGTACTTGTAAATTTCTTTCTCACGTGTGCTGA
A_73_P043981|515080	0.018312	0.00102859	up	2.0258	2.0258	1.01849	FBXO5	Bos taurus F-box protein 5 (FBXO5), mRNA [NM_001082435]	CGACGGTTATGATTGCTTATTACATCAATTGAGATCGATCATGAAGGCTAGTTAGAAAAA
A_73_109083,A_73_P095251,A_73_P384201,A_73_P494748|537511	0.0176142	0.000891639	up	2.02271	2.02271	1.01629	PHC2	Bos taurus polyhomeotic homolog 2 (Drosophila) (PHC2), mRNA [NM_001192908]	CAGGAGATTTTCCTTTCCAGATTGTTGTGGTGTCTCTGCAGCCCTTTCCTGCACTGTGAC///TCAAGCTGGGGCCAGCCCTTAAGATCTACGCACGTATCAGCATGCTCAAGGACTCCTAGG///AATAAACCACCACAGGCCATTGTGAAACCCCAAATCCTGACGCATGTTATCGAAGGGTTT///AGTTTAAGCGTTCCAAGCACTTTTGTTCCATGGCTTGTGCAAAAAGGTACAACGTGGGGT
A_73_102483	0.0154489	0.000147364	up	2.02212	2.02212	1.01587		Rep: Cell division protein kinase 8 (EC 2.7.11.22) (EC 2.7.11.23) (Protein kinase K35). - Canis familiaris, partial (76%) [TC419280]	CGTTGTTTAGGGTGCCCTTACTTCAGCAAAGAAGAAGGAGTAGGAGAGCCTTAGACTTTT
A_73_115901,A_73_P130241|508763	0.0250284	0.00321973	up	2.02144	2.02144	1.01539	TFPI	Bos taurus tissue factor pathway inhibitor (TFPI), mRNA [NM_001244204]	AATGAGAACAATGTTACCTCTAGAAAAGCATGCGTTAGGGCTTGTAAAAAAGGTTGCATC///TCATAAAATCCAGGATAATGCTATGAATAATGCCTCCTTGACTCCCCAGCCTAGCAAGGA
A_73_117528	0.029131	0.00460318	up	2.01786	2.01786	1.01282			TTTGCACAATGTTTTCCTGTTTGTGTAAATCAAAGCACTGTACATGTTACTCTGTGTGTG
A_73_P150301,A_73_P296401,A_73_P096396|539020	0.017321	0.000817825	up	2.01766	2.01766	1.01269	BCL6	Bos taurus B-cell CLL/lymphoma 6 (BCL6), mRNA [NM_001206450]	TTTGGCTGTGTCTAAACTGCATTACCGCGTTGTAAAATATAGCTGTACAAATACAAGAAT///TCTTCACAGACCAGTTGAAATGCAACCTCAGTGTGATCAATCTGGATCCTGAGATCAACC///TACCATTGTGAGAAGTGTAACCTGCATTTCCGTCACAAAAGTCAGCTCCGTCTTCACTTG
A_73_P337221,A_73_P038976|540693	0.0302276	0.00497597	up	2.01728	2.01728	1.01241	AP1S3	Bos taurus adaptor related protein complex 1 sigma 3 subunit (AP1S3), mRNA [NM_001103296]	CTCCTTTTTCTTTCCTCATCTCCCAAAGGAAGTACTTGCTGCTGCCTATTATTATTGTGA///GATCCTGGGTACGTCTTACATGGACCTTGGTGAAAATAATCATGTTTTCTTTATATCATT
A_73_102485,A_73_P494958|519217	0.0176082	0.000875922	up	2.01663	2.01663	1.01195	CDK2	Bos taurus cyclin dependent kinase 2 (CDK2), mRNA [NM_001014934]	AGGCGGAATTGAAAGGACGCTTCAGTATTAGATGCACTTAAGTCAGCCTCCACTACCCTC///GGAATTGAAAGGACGCTTCAGTATTAGATGCAATTAAGTCAGCCTCCACTACCCTCTCTC
A_73_P203777	0.0353669	0.0069539	up	2.01345	2.01345	1.00967		Rep: Proline-rich protein 16 - Homo sapiens (Human), partial (38%) [TC442721]	CTGAGGATGATACAAGAAGGTTTATTTTCTATGCTATACAATTATGATCCTATGTCCACC
A_73_P093506|535643	0.0242689	0.00295837	up	2.01242	2.01242	1.00893	MAST2	microtubule associated serine/threonine kinase 2 [Source:HGNC Symbol;Acc:HGNC:19035] [ENSBTAT00000033290]	GGCCCTCAGGAGCATCAGGACTTGGCATTGTTACCTGATGAGCTTTTAAAGCAAACATAG
A_73_P349691,A_73_P503348,A_73_108541|513155	0.0188707	0.00117872	up	2.0124	2.0124	1.00892	MMD	Bos taurus monocyte to macrophage differentiation associated (MMD), mRNA [NM_001075601]	GTGATTGAGCTCTTTTTCTATCTCACAATGGGCTTTTCTCCTGCCTTGGTGGTAACATCA///TCTGGTGCCCAGTGGTTTAGTTATTGTCACTTAGCTTTATATTATCGGTTTGATAGTCAT///AAGTATATTAACTTTTGTGGATTCATTTGAAATCTGCGCAAAAGTACCACTGGCAAAACC
A_73_P325296,A_73_P325611,A_73_120947|767842	0.0300349	0.00491287	up	2.01221	2.01221	1.00878	C6H4orf32	Bos taurus chromosome 6 open reading frame, human C4orf32 (C6H4orf32), mRNA [NM_001076961]	GTCCTGTTTCTAAAATTTATTCTGTATGTCCTCAGCATCTTCCATACTGAAGCAGAAAAA///CAAGTCAGTAATTGGCCAGGCATGTTATTTATGTGTCTTATTCAACACTTTTGGGGTTTT///TTGACATTATTCGTGTCCAGTAGAGTTGCGAGGTTTTTAACAGAAGTCATGAGATTTTGT
A_73_P260401	0.0259596	0.003543	up	2.01025	2.01025	1.00738		coiled-coil serine rich protein 2 [Source:HGNC Symbol;Acc:HGNC:29197] [ENSBTAT00000023416]	CTTTGGTATCTCCTTCAGTTCCTGAAACATCTCCAAATAGGACTCCCACTTATAAGAAGT
A_73_P081366,A_73_111352,A_73_P379786|541106	0.0205612	0.00174488	up	2.00955	2.00955	1.00687	RRAGD	Bos taurus Ras-related GTP binding D (RRAGD), mRNA [NM_001192828]	GTTTGTTGTAAAAAACTCAAGAAGAAGAAGGAGATTGGGACATATGACATACGTTTGTTG///CATTACACAAATGTAAACTTTTATGGTCTGTAGTCAGAAAAAATCCTGTGTTCGTACTGC///TTGCTTCCGGAAGGCCATCCATGAAGTTTTTGAGGTGAGAATGAAAGTAGTGAAATCGCG
A_73_P440281,A_73_102844|538785	0.030311	0.00500762	up	2.00814	2.00814	1.00586	STAMBPL1	Bos taurus STAM binding protein like 1 (STAMBPL1), mRNA [NM_001076129]	CAACCATCGAGATTACCAGCAATGTGCAGTACCCGAAAAGCAAGATATTATGAAGAAACT///TGTCTTAAGAGGTTACAGTGGATTTGTCAGTATCCATTAGTGTGCCTGAATACTATGACC
A_73_109941|524749	0.033928	0.00642233	up	2.00665	2.00665	1.00479	MINDY2	Bos taurus MINDY lysine 48 deubiquitinase 2 (MINDY2), mRNA [NM_001046275]	AAATCACAGAGTACACTCTTTATGAGCTGGAGTTTCATGTTACAAGTTGGAAATGCTGTG
A_73_116497,A_73_P118531,A_73_P295921,A_73_P282391|282704	0.0181487	0.00099712	up	2.0066	2.0066	1.00476	TBC1D1	Bos taurus TBC1 domain family member 1 (TBC1D1), mRNA [NM_001166524]	AAGTTTAATTCTTCCCTTTTCCAGTCTTAATTACTGTACTCAGTAGATTAGATGGCATGG///CCAGCTATAATTTAGCAGAGTTAACATGTGAGATCTTTTTCCCACATTCTTTACTGTTTG///GGGGACGACACGTCCCCGTGTTTTTGTTGTTGTTTAAGTTTAATTCTTCCCTTTTCCAGT///ACTATGCTCTTCACGATTGGTCAATCTGAAGTTTACCTCATCAGTCCTGACACCAAAAAA
A_73_P120481,A_73_P377906,A_73_111193|507027	0.0201272	0.00159723	up	2.00611	2.00611	1.0044	GRAMD1A	Bos taurus GRAM domain containing 1A (GRAMD1A), mRNA [NM_001305021]	GAAGTTCTCACTGGAGAAGCTACATCAAGGCATCACCGTCTCAGACCCTCCCTTCGACTC///TTTTACCGCCTCTGGTCCCTGGAGAGGACAGCTCACACTTTTGAGTCCTGGCACAGTCTG///TACACGATTCCTTCAGCTCTGGGTTTAATGTATTATATTTATTTGGGGCTGACAGCCCCA
A_73_118967	0.0244161	0.00299803	up	2.00526	2.00526	1.00379		Rep: Chromosome undetermined scaffold_22, whole genome shotgun sequence - Paramecium tetraurelia, partial (8%) [TC401583]	AATCCCGTGTTTTAGTCACAACAGTGAAATGGCACAGTGTAAAGCCACTCTGCATCTAGT
A_73_106295	0.0234406	0.00266691	up	2.00516	2.00516	1.00372			CACTCGGCCCTCACACCACTTCCTGGGAAACTTTATTTTTAAAGATAGTCCATTGAGTCA
A_73_P096321,A_73_109263|539374	0.0280617	0.00428975	up	2.00463	2.00463	1.00334	FAM43A	family with sequence similarity 43 member A [Source:HGNC Symbol;Acc:HGNC:26888] [ENSBTAT00000057417]///PREDICTED: Bos taurus family with sequence similarity 43, member A (FAM43A), mRNA [XM_586734]	ATGAGGGCCGAGCTTTCGCAGCTTATTAACGACCTGGGCGAGCTCAGTTTTGGCAACGAC///CTGTGTTCTCAGAGTCCAATGTTTATATCTTTTGCTGTGCAAAAGGGACATGTAAAATGT
A_73_P396431,A_73_P056721|618444	0.034961	0.00679888	up	2.00391	2.00391	1.00282	TOR4A	torsin family 4 member A [Source:HGNC Symbol;Acc:HGNC:25981] [ENSBTAT00000032623]	GTGGGCTTCCAGGTGCTCAACGCCATTGAGAACCTGGACGACAACGCGCTGCGCTATGAC///ATCGTGCCCTTTCTGCTGCTGGACAAGCGGGACGTGGTCAACTGCTTCCGGGACGAGATG
A_73_P037536|614774	0.0289122	0.00454203	up	2.00319	2.00319	1.0023	SMIM14	Bos taurus small integral membrane protein 14 (SMIM14), mRNA [NM_001046543]	GAAATCTGTATCATCCACTACAGATGATTTATGTGGCTAAGAAGAGGAGAAAAGAAATGA
A_73_101604	0.0270173	0.00389393	up	1.99866	1.99866	0.999034			GCCCATGTCTGCTAGAGTAGGCCGAATATGTATTTCATGGACTCTATAAGAACATCCAAT
A_73_118891,A_73_P030636|282390	0.0375397	0.00789113	up	1.99842	1.99842	0.998856	TYROBP	BovGen_24453 normal cattle brain Bos taurus cDNA clone RZPDp1056L0236Q 5', mRNA sequence [CO896128]///Bos taurus TYRO protein tyrosine kinase binding protein (TYROBP), mRNA [NM_174627]	ACAGAGTGGCCTCCATGAGATGTCAGACCTCTCCCCACTACTGCCCCCAAATAAACATTG///ATTACAAATGAGTCCAAAGCAGGGCAGTCAACGACCTGAGGCCTGGATCCAGTCATTCCT
A_73_P464446,A_73_117930|614212	0.0193603	0.00130486	up	1.99815	1.99815	0.998666	LMO4	Bos taurus LIM domain only 4 (LMO4), mRNA [NM_001034751]	TCGGCACGTCCTGTTACACCAAGAGCGGCATGATCCTTTGCAGAAACGACTACATTAGGT///TCAGGCTCATAGCAGCTACTGTGTAGAAATTCCCCCCTACTTCTAATTTGCTGAATGAAG
A_73_P069776,A_73_111683|526395	0.0217377	0.0021	up	1.9969	1.9969	0.997764	SERF1A	Bos taurus small EDRK-rich factor 1A (telomeric) (SERF1A), mRNA [NM_001113301]	TGACTTAGTGTGATGTTTCAGAACCACTCTTCAAAGAATAAAACACTAACCATGCATATG///TCAACCTGACTTAGTGTGATGTTTCAGAACCACTCTTCAAAGAATAAAACACTAACCATG
A_73_117519|517192	0.0193632	0.00131393	up	1.99585	1.99585	0.997004	JUND	Bos taurus JunD proto-oncogene, AP-1 transcription factor subunit (JUND), mRNA [NM_001103253]	CCACATTCCTGTTTGTAATCCTTGGTTCGCCCGGTGTTGTTTTCAGTAAAGTCTCGTTAA
A_73_P333536,A_73_P204697,A_73_P113186|100299171	0.0167188	0.000707162	up	1.99539	1.99539	0.996673	GINS2	GINS complex subunit 2 [Source:HGNC Symbol;Acc:HGNC:24575] [ENSBTAT00000061540]	TCGGGACATGACAGAGATACTCACGTTTCTGGAACTCTAGACCACTTCTGAATCTACGAA///TACATGGAGCTCACCAAACTGCTGTTAAATCATGCTTCGGACAACATCCCGAAAGCAGAT///GAAACTTTTACACCTATGCCCAGCCCTTACTACATGGAGCTCACCAAACTGCTGTTAAAT
A_73_107554	0.032105	0.00571339	up	1.99288	1.99288	0.994858		Rep: Methionine synthase (EC 2.1.1.13) (5-methyltetrahydrofolate-- homocysteine methyltransferase) (Methionine synthase, vitamin-B12 dependent) (MS). - Bos Taurus, partial (20%) [TC423597]	GGAGCTGGAAAAATGTTTCTACCTCAGGTTGGCAAATGGGGGAAAAAGTTTCACAATTGA
A_73_P043056,A_73_109920,A_73_P078721,A_73_P443116|514494	0.0155841	0.000261556	up	1.9926	1.9926	0.994654	CA5B	Bos taurus carbonic anhydrase 5B (CA5B), mRNA [NM_001080908]///carbonic anhydrase 5B [Source:HGNC Symbol;Acc:HGNC:1378] [ENSBTAT00000044236]	TAACAGTACCCTCTTTCACTCTCAACCATGTCCTGCTTTGTATTACAATTGCTGCTCATT///TACTCTTTCCTCGTGGAATTTGAAGATTCTGCAGATAAATCAGGTGAGAGCCAGACCCGT///ATGAACCGCACTGTCCGCTCATCCTTCCATCATGACTATGTGCTGAACATACAAGCAAAA///TAAGCTAAAGATGGTGATGATGAGTCACCTGAGGGCCATTCTTCAAGCCTCTCCATACAA
A_73_101695,A_73_P093801|527379	0.0228573	0.00241775	up	1.99184	1.99184	0.994099	ZMYM1	Bos taurus zinc finger MYM-type containing 1 (ZMYM1), mRNA [NM_001205509]	CATTGGCAGATACTCATGATGCCCTGCCCATTGTGAACTCTGATGTATTACAAGGTAAAA///ACAAGAAAAGCTTAGTGGCTTAGCCCTAATGGCCGTTGAGCAGGAATTGGTAGATAAACT
A_73_P038136|526430	0.0176082	0.00087895	up	1.9917	1.9917	0.993999	NCK2	Bos taurus NCK adaptor protein 2 (NCK2), mRNA [NM_001099036]	GGGGTCTTGAGACCTCCTAAACTGCATACTCAGTTTTTTGGATATTGTAATAAAAAAGTA
A_73_109262,A_73_P455516,A_73_P294306|507197	0.016629	0.000678302	up	1.988	1.988	0.99132	SHMT2	Bos taurus serine hydroxymethyltransferase 2 (SHMT2), mRNA [NM_001034282]	CCTCTGATCAGAGGCGACACCAGACGTGATTAGCAGGCGCAACAAATTCAATTTGTTAAA///AGAGGAAGGGGTGGGTAGGCACCCTTCTTTCTGTTTCTATCTAATAAAATACTAACCTGC///TATCTTCTTCGAGTCTATGCCTTATAAGCTGAACCCCCAAACCGGCCTCATTGACTATGA
A_73_P304866	0.0280414	0.00426473	up	1.98757	1.98757	0.991005		Rep: Glycogenin-2 (EC 2.4.1.186) (GN-2) (GN2). - Canis familiaris, partial (17%) [TC428074]	TGCCTGCAGCCATGAAATTAAAACACACTTTCTCCTTGGAAGAACAGCTTTGACCAACCT
A_73_P309636,A_73_P031451|512125	0.0278119	0.00419158	up	1.98746	1.98746	0.990923	MAPK15	Bos taurus mitogen-activated protein kinase 15 (MAPK15), mRNA [NM_001046110]	AGAAAATCTTTGATGCCTTCAAGGATAAGACAGATGCCCAGAGGACGTTCCGGGAAATCA///GGGACTCGCTGAGGTTCACACCCCAACCTCCATCACTTCCTCCAATAAAGTTCTATCTGT
A_73_P032986,A_73_P130316|540616	0.0268341	0.00384598	up	1.98733	1.98733	0.990831	MAX	Bos taurus MYC associated factor X (MAX), mRNA [NM_001105633]///LB02548.CR_K09 GC_BGC-25 Bos taurus cDNA clone IMAGE:8618051, mRNA sequence [EE344671]	ATATGCGAAGGAAAAACCACACACACCAGCAAGATATTGATGACCTCAAGCGGCAGAATG///CTGCTCTACTTTCAGAAGATGACCAGTTTGGAGTAATCAGAATTATTCCCCCTTCTTTTT
A_73_P118641,A_73_P051026|509613	0.0161901	0.000414672	up	1.98732	1.98732	0.990825	EIF4EBP1	Bos taurus eukaryotic translation initiation factor 4E binding protein 1 (EIF4EBP1), mRNA [NM_001077893]	TCTTCTTCGTGGACACCAGCACATACCTCCGTGTGCCTCCAACTCTGCAGGAACTAGTAC///TGTGTGGGGAAAGCTCCCCACCCCCTCCCTTCCTGAGAAAGGAAATAAAAGCCACCTTCG
A_73_P165878	0.0314159	0.00541967	up	1.98715	1.98715	0.990702		Rep: Chromosome chr9 scaffold_7, whole genome shotgun sequence - Vitis vinifera (Grape), partial (3%) [TC454676]	GGGGACCAACTCTATGGAAATTGTAAATAAGTTTTATTTATAAACCTGGCACTGTACTCA
A_73_P034946|768313	0.0161901	0.000421349	up	1.98634	1.98634	0.990114	SOX4	Bos taurus SRY-box 4 (SOX4), mRNA [NM_001078128]	ATGATCTCGGGAGACTGGCTGGAGTCCAGCATCTCCAACCTGGTCTTCACCTACTGAAGG
A_73_120568|533491	0.0335681	0.00628524	up	1.98513	1.98513	0.989234	RASA2	Bos taurus RAS p21 protein activator 2 (RASA2), mRNA [NM_001193020]	TACTAGAAAATTTCAATCCATGACTATTCAGAGCTTTCCGTTTAGTTCATCTAGACCCTT
A_73_P205087	0.0365771	0.00741924	up	1.98497	1.98497	0.989115		PREDICTED: Bos taurus uncharacterized LOC783066 (LOC783066), mRNA [XM_001250849]	AAACTGAGTTTTCTAACGACCTTTTCCAAATGACTGGAGACTTTCCGGTGGAGTGTGGCT
A_73_106823,A_73_P476388|533595	0.0231187	0.00254203	up	1.98428	1.98428	0.988613	TLE2	transducin like enhancer of split 2 [Source:HGNC Symbol;Acc:HGNC:11838] [ENSBTAT00000001534]	CTCGTGTCCTCCCCTGCTGAATGTGGGGCCAGATACACAGGAGGACCTTGGGGAAATAAA///TGAGGAGAAGGATCTATCAGGACCTTATGAAAGTGACGAGGACAAGAGCGATTACAACCT
A_73_P251491,A_73_106731,A_73_P050286|510457	0.0205139	0.00172965	up	1.98312	1.98312	0.987773	OSER1	Bos taurus oxidative stress responsive serine rich 1 (OSER1), mRNA [NM_001015568]	TATGCATAGGCAAGGAGTGCCAGTGTAAGAGGTGGCATGACATGGAGGTATATTCCTTTT///GCTCACTGTGCTTGCAATAAAAACTTTTCTTGGCATCTCAGTCAGTTAATCTTCGTTCTT///TACTTTGTGTGAGAAGACATCTCCTTCTGCTCACTGTGCTTGCAATAAAAACTTTTCTTG
A_73_104827,A_73_P038076|282353	0.0375827	0.00790781	up	1.98303	1.98303	0.987707	SLC1A1	solute carrier family 1 member 1 [Source:HGNC Symbol;Acc:HGNC:10939] [ENSBTAT00000025456]///Bos taurus solute carrier family 1 member 1 (SLC1A1), mRNA [NM_174599]	GTTCTGTATTGACCACCTGCACCTGAAATCTTTAAGAGAATGATACCAAATGATCATGTA///TTATTGCACAGTTGAATGATTTGGACTTGAGCGTTGGGCAGATCATCACTATCAGTGTCA
A_73_118769	0.0424477	0.00996489	up	1.98224	1.98224	0.987133		Rep: PREDICTED: interferon regulatory factor 2 binding protein 2 isoform 2 - Pan troglodytes, partial (81%) [TC398729]	AGATACCTTTCCTTGGCCACCAAGTATTTTAAAAGTGTGCCACCTTTTAACCTTTACTTT
A_73_120356,A_73_P308711,A_73_P093211|100124505	0.0318354	0.00560835	up	1.98098	1.98098	0.986212	PDE4B	Bos taurus phosphodiesterase 4B (PDE4B), mRNA [NM_001102546]	TGTTTCCAATTTAATGCTGCCGTCTTTCTCTTGCACTGCCTTCTGTGCTAACACCTGCAT///AATTCAGAACTTGCTTTGATGTATAATGATGAGTCTGTGTTGGAAAACCATCACCTTGCC///AGAAGTTTCAGTTTGAACTAACCCTCGAAGAGGAGGATTCTGAAGGCCCCGAAAAAGATG
A_73_118860,A_73_P407891|538618	0.0173221	0.000831699	up	1.9808	1.9808	0.986084	ENDOD1	Bos taurus endonuclease domain containing 1 (ENDOD1), mRNA [NM_001102519]	AAAGGGCGTGATGAGTCAATTTGACATTTTCAAGCTATGTACAATGCTGTGCACCTTGCA///TTTCCTCTGGTATGTCACCAAGCAGGTGATTAACGGTCTAGAAAGTTGCCTTTATCGCCT
A_73_P082541,A_73_119574|536359	0.047955	0.0124422	up	1.98053	1.98053	0.985884	AP3S1	Bos taurus adaptor-related protein complex 3, sigma 1 subunit (AP3S1), mRNA [NM_001046416]	GAACTGGATTTAATTTTCCATGTAGACAAGGTTCACAATATTCTTGCAGAAATGGTGATG///CTTCCTGAGATCCCAAGAAATATTAACATTGGTGACATCAGTATAAAAGTGCCAAACCTG
A_73_102475|513873	0.039472	0.00871532	up	1.97994	1.97994	0.985459	NDOR1	Bos taurus NADPH dependent diflavin oxidoreductase 1 (NDOR1), mRNA [NM_001046158]	CAGCACCGGCTCCGGGCGCTCGGGCCGCTGGTGTGGGAGCTGCTGGACGGCCGGGGCGCC
A_73_114207,A_73_P077721,A_73_P132586|535439	0.0263412	0.00369213	up	1.97948	1.97948	0.985121	SMARCA1	Bos taurus SWI/SNF related, matrix associated, actin dependent regulator of chromatin, subfamily a, member 1 (SMARCA1), mRNA [NM_001191542]	CTTTGTTGCTTTCTTTTCTATTGATTATGGGCTTGTACGTGTTACTGCATACTGTGATTA///GCCGCTGCTTTGAAAGAGAACCTAGATTCTATAGCTGTATTATTGTTGTTTCATACTTTA///ATTCAGCTGTATTTTGGGAGCGTTGCAATGAATTACAGGACATTGAGAAAATTATGGCTC
A_73_P077411	0.0379078	0.00800504	up	1.97923	1.97923	0.984936		Rep: Glypican 6 - Sus scrofa (Pig), partial (87%) [TC450065]	TCTTACCTTCATTTGCTTTTATGCTGCAGAAGTAAAGGAATCTCACGTTGTGAGTTTTTT
A_73_P067741	0.0415978	0.00960832	up	1.97854	1.97854	0.984434		LB03010.CR_F10 GC_BGC-30 Bos taurus cDNA clone IMAGE:8135820, mRNA sequence [DV927382]	ACTCGCTACAAGGACTATGGAACTCAGCAAAGCTGTTTACTCACGGATATAATTTACTAC
A_73_P270286,A_73_103667,A_73_P360406,A_73_P045776|514541	0.0248639	0.00314923	up	1.97787	1.97787	0.983947	RAB13	Bos taurus RAB13, member RAS oncogene family (RAB13), mRNA [NM_001024540]	TGAAGGTTTGGTCCTATGCTGTCACTCTGCATGGTCTTTCTCAGTATTAAAGGCCACCAT///AATACCACCCTCTGAAGGTTTGGTCCTATGCTGTCACTCTGCATGGTCTTTCTCAGTATT///AATCCAGTATGAATGTAGATGAGGCTTTCAGTTCCCTGGCACGGGACATCTTACTCAAGT///TGAAAACTTGTGACAAGAAGAATACCAACAAGTGCTCCTTGGCCTGACGACTCCTTTCTG
A_73_106357|280960	0.0282553	0.00433902	up	1.97739	1.97739	0.983594	XDH	Bos taurus xanthine dehydrogenase (XDH), mRNA [NM_173972]	ATAACCTCAGATGCACACTTAGATTTGCAATGGGACAGTGGGGTGCAATTCAAACCTCTG
A_73_101183|541233	0.0155841	0.000265595	up	1.97735	1.97735	0.98357	RCOR2	Bos taurus REST corepressor 2 (RCOR2), mRNA [NM_001206075]	TCCACCAGCCTGGAGTAAGGAGGGTTGGGAACATATGCAGACATGGGTTTATTTTTCAAT
A_73_105325,A_73_P057856|521040	0.0472061	0.012097	up	1.975	1.975	0.981855	RGS11	Bos taurus regulator of G-protein signaling 11 (RGS11), mRNA [NM_001075814]	CATGGCTTCTCCTGACCTGCACGGAGACAGAGACTGCTCCAGCACCACTGGTCCTCGGAA///AAGGACTCCTACCCGCGCTTCTTGAAGTCAGACTTGTACAGAGACCTGCTGGCAGAGGCT
A_73_P042346,A_73_P416496|533862	0.041829	0.00971146	up	1.9748	1.9748	0.981705	PAPD4	Bos taurus poly(A) RNA polymerase D4, non-canonical (PAPD4), mRNA [NM_001046361]	CTGCTATCCTGAAAAGATAACTGGCCTCTATTTCTTAATAAAGAGCAGTAGTAACATCAT///TCTGTCGAACAGAGCTGCAGAGAGAAATTCAACTGTTATTTCCACAAAGCAGACTTTTTT
A_73_110860	0.0161901	0.000476558	up	1.97474	1.97474	0.981664		Rep: Septin-6 - Homo sapiens (Human), partial (31%) [TC409738]	GGCAGTTTTGAGATGTATTGTTTGGTGAGTCACTGATTGGTGAGTGGCCAGAAGCAAGTA
A_73_P368251	0.0260856	0.00358303	up	1.97293	1.97293	0.980343		PREDICTED: Bos taurus KIAA1217 ortholog (KIAA1217), mRNA [XM_590767]	TTAAATGAAGCATGTGTTACCAAAAAAGAGAGTATGGCGAGAGAGAAGGGTGTGTGTGAG
A_73_P054461	0.0361738	0.00730357	up	1.97231	1.97231	0.979889			TGAATGGAGTTCCTCTCACGATCTTTGATGAGGAGAGGAAGCTTGAGCAGCTATTACATG
A_73_109764,A_73_P135776|615897	0.0230085	0.00246293	up	1.97151	1.97151	0.9793	TOMM5	Bos taurus translocase of outer mitochondrial membrane 5 homolog (yeast) (TOMM5), mRNA [NM_001143740]///970193 MARC 4BOV Bos taurus cDNA 3', mRNA sequence [CK847546]	ATACCTGTGATATCAGCCTCAATGAATGTTGGTATAATTGTACATCATGATGTCAAACTC///CCAAGAGTCAGTGAAGAATCTCTACCATAAATAAAGAGGACTGAGGAGTGAAGCCTGGGA
A_73_P050166,A_73_P377076|767896	0.023965	0.0028568	up	1.97115	1.97115	0.979039	ZFP2	Bos taurus ZFP2 zinc finger protein (ZFP2), mRNA [NM_001098146]	CATGGGACCCTTCATCATGATTAACTCTTCAGTGGTAATCAGATAAATCATGTAATATAG///GACATCAGCTTTCCAAACCTAATGTGATTTCTCAGCTGGGTTGAGAACTGAACCTGATGA
A_73_100406,A_73_P269021|534041	0.0155841	0.00022184	up	1.97011	1.97011	0.978279	MICAL2	microtubule associated monooxygenase, calponin and LIM domain containing 2 [Source:HGNC Symbol;Acc:HGNC:24693] [ENSBTAT00000046258]	CCACGTGGAACCCTGTATTTTGCACACAGCGAAAAATGTTTAGCTTTATTTATGGTATTT///AGTTTTTCTGCAAGCCTCATTTCATTCACTGTAAGACCAACAGCCAGCAACGGAAGAGAC
A_73_110251|533794	0.041829	0.0097111	up	1.97011	1.97011	0.978279	SLC25A33	solute carrier family 25 member 33 [Source:HGNC Symbol;Acc:HGNC:29681] [ENSBTAT00000004127]	CTCGCATCACCTGTTGGACATTTCCTTTTGGATTCATGCTTTCTGGAAGGTTTAAATTCA
A_73_102206|282216	0.0231187	0.00252571	up	1.97004	1.97004	0.978222	DNAJC5	Bos taurus DnaJ heat shock protein family (Hsp40) member C5 (DNAJC5), transcript variant 1, mRNA [NM_174533]	AGGAGAACGTGAACACCTACTTTGTGCTCTCCAGCTGGTGGGCCAAGGCCCTGTTCATCT
A_73_P203687|534181	0.0225006	0.00232757	up	1.96875	1.96875	0.977282	LOC534181	PREDICTED: Bos taurus cytosolic 5'-nucleotidase 3A (LOC534181), mRNA [XM_005198640]	CCATTGGTATCGACATGTCACTAATTATTACAGAATGTTCTGTATCAAAGCACTGACAAT
A_73_P105746,A_73_P051261,A_73_P264716,A_73_P476998|537027	0.0212301	0.00195643	up	1.96818	1.96818	0.976865	BUB1B	Bos taurus BUB1 mitotic checkpoint serine/threonine kinase B (BUB1B), mRNA [NM_001145173]	GAAGTTGTGGGATCTTCTGTACCACAGCGAAGCACACTGGCTGAACTAAAAAGCAAAAAA///TCACCTGAACAAAGCTTTTTGGAAAGTGGGGAAGTTAATCAGTCCTGGGGCTTTCCTCTT///GGTTTTCCGGAAGAAATTAAAAGAGCGAAGAGAAGCTGAGCTACTGACCAGTGCAGAGAA///TTTTTAACCTCAGTGGCTTTCCGACTGTACAAACCCTGGAAGGACAAAAGATCCTGGCTA
A_73_113068,A_73_P447341,A_73_P327701|511654	0.015973	0.000342068	up	1.96809	1.96809	0.976798	CHAF1B	Bos taurus chromatin assembly factor 1 subunit B (CHAF1B), mRNA [NM_001098014]	AGAGATATGTCACCTCTTGTATTTAGGATACTTTTTCCCTCGGAGATGTGAACATCTTAA///AGGAGACAGTACTTTGAGGTTTATTCCATTGGGTTTTAGTGTGTTGGATTATTTGATCAA///AATGTGACAAACACGACTTACGTTTTCTCCAGGAAAAATCTTAAAAGGCCCATCGCCCAC
A_73_102736,A_73_P113676,A_73_P233207|615408	0.0184091	0.00106742	up	1.96682	1.96682	0.975862	SEPT5	Bos taurus septin 5 (SEPT5), mRNA [NM_001076371]	TTCTGTTGTGAATGCTGCACCCTGTCCTGGTGACAGGAGAACAATGTTGGTGAACGTCCA///AAGAACATCCAGGACAACCGGGTGCACTGCTGCTTGTACTTCATCTCCCCTTTCGGGCAC///ATCCGCACGCACATGCATGACCTCAAGGACGTGACCTGCGATGTGCACTACGAGAACTAC
A_73_P264926,A_73_P165742,A_73_P043081,A_73_117022|526637	0.0398081	0.00887283	up	1.96615	1.96615	0.975373	SPINK5	Bos taurus serine peptidase inhibitor, Kazal type 5 (SPINK5), mRNA [NM_001102102]	AAGAAGAAAAATCAAGAGCCAAGCCCTCAAATGATGCAAAGGACCAGTGCAGAGAGGTTC///AATGGAGTACTTTTCTGTACCAGAGAAAACGACCCTGTTCGTGGACCAGATGGGAAAATG///ACACATACGCAGTAAAGGAAGGTGTGAGGAGAACAGCATCGAAGAAACAACACCTCTTGA///AGAGACATCTTAACCAGTTTGTGCTGTGGAAGCCTCCTGATCACAATGCTGTCTGTTCAA
A_73_115262,A_73_P269726,A_73_P269391|512427	0.015973	0.00034542	up	1.96553	1.96553	0.974917	NASP	Bos taurus nuclear autoantigenic sperm protein (NASP), mRNA [NM_001038088]	ACTGCATGTTAAGAGAGGGAGCAGAGCCTGCCTCCCAGTGGAAAGTGTTTTTGTATATAA///TTGTGTTACTGATATTTCCCACCTTGTCAGAAAGAAGAGGAAACCAGAGGAAGAGAGCCC///GCCTCCCAGTGGAAAGTGTTTTTGTATATAATGTATTTTTTCACTTTTGGGGGATTCTTT
A_73_101077|616194	0.0152818	0.000103046	up	1.96517	1.96517	0.974654	HSPB11	Bos taurus heat shock protein family B (small) member 11 (HSPB11), mRNA [NM_001076412]	TAGTGTTTCTGCGGAGGGAGTAGCAGTCTCAAATCTTTCTTAGTAATTATAATATACCCA
A_73_P096791|785659	0.0161901	0.000452958	up	1.96385	1.96385	0.973685	SIAH2	Bos taurus siah E3 ubiquitin protein ligase 2 (SIAH2), mRNA [NM_001207054]	ATAGCGCATCTTTTTGCAGATAATGGGAACCTTGGCATCAATGTGACTATTTCTACATGT
A_73_107410	0.0267524	0.00382879	up	1.96341	1.96341	0.973364		Rep: PAOX protein - Bos taurus (Bovine), partial (8%) [TC421771]	CAAGAGCAACATGACAGTCACATCATGTTTCACAAACATTTCTTTCAGTTAAGTTGGAAT
A_73_110714	0.0161901	0.000441194	up	1.96337	1.96337	0.973335			AGCCTCTGAGGCTTTAGCTGTAGAACCAGGTAGGGGGGATGAAAACAGTTATTACAGAAA
A_73_109004|535352	0.0494306	0.0131177	up	1.96328	1.96328	0.973265	SCAMP1	Bos taurus secretory carrier membrane protein 1 (SCAMP1), mRNA [NM_001076054]	TCCCTGTAGAATTCCAAAAAACAGTAAAGATTATGTACTACTTATGGATGTTCCATGCTG
A_73_117003	0.0201272	0.00158485	up	1.96267	1.96267	0.972816		Rep: DNA replication complex GINS protein PSF2. - Bos Taurus, complete [TC430523]	TTACGCTCAGTTGAGACATTCTGTAATTCCTTATCTGTGTCTGGGAGCCAGCTGCCTTTT
A_73_P441411,A_73_P060071,A_73_P391586,A_73_P142536|508467	0.0266072	0.00377368	up	1.96263	1.96263	0.972789	KIF11	Bos taurus kinesin family member 11 (KIF11), mRNA [NM_001192185]	GAGTGTACATTTCTGAAGAAAATTTTAGAGCTATGAGTGGAAAACTAACTGTTCAAGAGG///CCAGAACTTGAGCCTTGTGTGTAGATTAAAAATGAGTAGAAAATATCAAGGCAATACTGT///AAGATCAGAAGAAGGAAATGGATGGCTTTCTTAGTACATTGTGTAACAATCTACATGAAC///GCCAGAGTTTTATCTAGAAATCTTTGACACTTTTCTGTGGTTATCTCTAAAATCACTGTC
A_73_P368816,A_73_P034301|506895	0.0170714	0.000765816	up	1.96227	1.96227	0.972522	HAX1	Bos taurus HCLS1 associated protein X-1 (HAX1), mRNA [NM_001045953]	ATAACTTCGGCTTTGATGACCTAGTACGGGATTTCAATAACATCTTCAGCGAGATGGGGG///AACTGAAGGTCTGTCAGTTTGTCAGTCACCCAAACTGACCAATAAAACCTTTATTTATGC
A_73_P092016|539835	0.0482496	0.0125883	up	1.96223	1.96223	0.972492	HSPA6	heat shock protein family A (Hsp70) member 6 [Source:HGNC Symbol;Acc:HGNC:5239] [ENSBTAT00000057500]	ACCAGTTAGCAGACAAAGAGGAATATGAGCATCAAAAGAGGGAGCTGGAGCAGATCTGTT
A_73_105149	0.0216044	0.00206137	up	1.9622	1.9622	0.972472		Rep: AFR592Wp - Ashbya gossypii (Yeast) (Eremothecium gossypii), partial (5%) [TC418021]	ATGGGGAGACAGATTTGAGCCCTGCCTCCTATTGCTTGACCTCACAATAAAAGTCATTCT
A_73_P105781,A_73_P387181,A_73_P096586|539627	0.0173918	0.000840375	up	1.96219	1.96219	0.972466	TNIK	TRAF2 and NCK interacting kinase [Source:HGNC Symbol;Acc:HGNC:30765] [ENSBTAT00000015600]	ACTTGTTGGCAACGGAACATATGGACAAGTATATAAGGGTCGTCATGTCAAAACGGGCCA///ACTTCTATATCCCCAGCATTAGCAAGGAAGAATTCTCCTGGAAATGGTAGTGCTCTGGGA///GGAGGAAGTAGCCAAGTGTTTTTCATGACCCTCAACAGAAATTCCATGATGAACTGGTAA
A_73_P099521,A_73_P046261,A_73_P092276|404144	0.0230085	0.00246436	up	1.96205	1.96205	0.972362	LMNA	Bos taurus lamin A/C (LMNA), mRNA [NM_001034053]	TACAAGAAGGATCTGGAGAAGACCTATTCGGCCAAGCTGGATAACGCCAGGCAGTCCGCG///GCCCTGGCCTCCCCCTGCCAGAAAGTCTTTTCATTAAAGAACATTTTGGAACTTAAAAAA///AGTGATCGTGGTCGAGGACGACAACGATGAGGATGGAGACGATCTGCTCCATCACCACCA
A_73_120194|507526	0.0236893	0.00277951	up	1.9619	1.9619	0.972252	CDH17	Bos taurus cadherin 17 (CDH17), mRNA [NM_001098902]	TGAAAGTGCTCAGGCATCTGAAACCAAGGCTCTGAGAAACTGAATGTGAAAAAGAATGTT
A_73_P499143	0.0305523	0.00508701	up	1.96157	1.96157	0.972007		Rep: E5 - Tursiops truncatus papillomavirus type 2, partial (12%) [TC421989]	CCTCTCAACATCGTATTAATAATATGTTGAATTATGTCACTAGTATGGCAGCGGTAGAAT
A_73_P388061,A_73_111466,A_73_P082791|509889	0.0198842	0.0015018	up	1.9615	1.9615	0.971957	FOSL2	PREDICTED: Bos taurus FOS like antigen 2 (FOSL2), transcript variant X2, mRNA [XM_015473535]///Bos taurus FOS like 2, AP-1 transcription factor subunit (FOSL2), mRNA [NM_001192950]	AGGCAAAAAGAACTGGGGTGAACTCAGCTCTGAAAGACTTAATCATCTCAAGTGGTATTT///TTATCGAATTTGCCATGACATTTCATCTGGGTGGTCTGAATAGTAAAGCTCTTCATTTCT///AAAGAGAAAGAGAAGCTGGAGTTCATGCTGGTGGCCCATGGGCCCGTGTGCAAGATCAGC
A_73_P038446|767917	0.0162642	0.000547505	up	1.96131	1.96131	0.971814	SPCS3	Bos taurus signal peptidase complex subunit 3 (SPCS3), mRNA [NM_001076993]	CAAGATTGTTCTGAGAGGTGATAATCCGAAGCTGCTGTTAAAAGATATGAAAACAAAGTA
A_73_P427056,A_73_P036441|617136	0.0277004	0.00415158	up	1.95906	1.95906	0.970161	SRFBP1	Bos taurus serum response factor binding protein 1 (SRFBP1), mRNA [NM_001105449]	CATTGAACCTCAGAACAGGAATCAGTTTAATAAGAAAGCGCAAGGAGGATTTGAAAATAC///TTGAAAATACAAAACAGAAATCACAGCTGCCTCTTCATCCTTCATGGGAAGCAAGCCGGC
A_73_117790|281817	0.023598	0.00271001	up	1.95892	1.95892	0.970055	HINT3	Bos taurus histidine triad nucleotide binding protein 3 (HINT3), mRNA [NM_174341]	GTCATTGACTTTGTTTTAATGGCTCCTGTCTAAGGTATAAGATACTCTAGATAAAATCCC
A_73_103936|511466	0.0175242	0.000862143	up	1.95839	1.95839	0.96967	SSSCA1	Bos taurus Sjogren syndrome/scleroderma autoantigen 1 (SSSCA1), mRNA [NM_001038528]	TAGCCTTATCCGGGCGTGTGCTGAAGCCCTGCGTAGTCTGCAGCAGCTGCAACACTAAAA
A_73_P045801,A_73_P069481,A_73_P166447|790880	0.0293063	0.00465877	up	1.95792	1.95792	0.969319	ATXN3	Bos taurus ataxin 3 (ATXN3), mRNA [NM_001099216]	GGAAGAGAAGAGAAGCCTACTTTGAAAAGTAAAGTAGTTGGTACCATATTAAAACTGCAT///CAGGCAGCTGTGACCATGTCTTTAGAAACTGTTAGAAGTAAAACAGAAGGAAAAAAGTAA///TCTTCAATTGCACATCAGCTAGATGAGGAAGAGAGGATGAGAATGGCAGAAGGAGGAGTT
A_73_103782|614512	0.0317195	0.00555242	up	1.95661	1.95661	0.968353	FANCL	Bos taurus Fanconi anemia complementation group L (FANCL), mRNA [NM_001076332]	AGTTGAAGGCGAAGTACCCTGCTGAATCACCAGATTGTGTTGTGGATTTTCCTGTTCCAT
A_73_P508173,A_73_115075,A_73_P271576|614508	0.0321837	0.00574805	up	1.95591	1.95591	0.96784	ACADL	Bos taurus acyl-CoA dehydrogenase, long chain (ACADL), mRNA [NM_001076936]	GAAATACTGGGCATCTGATTTGCAAAACAGAGTAGCTTATGACTGTTTGCAGCTGCATGG///AACCTGGAAAGGGAGGGAACACTAAACAAGTTTTTATCTGTTCTCTCTATAGAGAAAGAA///GTGGATGCCCGTGTCCAGACAATCTATGGTGGTACCAATGAAATAATGAAGGAGCTGATT
A_73_P121816,A_73_101702|509471	0.0183975	0.00106052	up	1.95543	1.95543	0.967484	UBE2L6	Bos taurus ubiquitin conjugating enzyme E2 L6 (UBE2L6), mRNA [NM_001098917]	ATTTTGCACTTGCTCATGTCTTCCAAGATTTCCTTCTTAGGTTGCGTGTGTGTGTACGGG///TTTAGGTGCAAAACCTTTCCGTTTCCACTGATGAATCATAAAGTGAAGAATCTCCTCTCC
A_73_108314	0.0152818	9.10084e-05	up	1.95536	1.95536	0.967436		Rep: IRX3 protein - Bos taurus (Bovine), partial (36%) [TC423352]	GTGTGAACCAAATTGTACAAGAAAGTATCTATTTTTGGCTAAATAAATGAGCTGTTGCCA
A_73_P494688,A_73_113150,A_73_P046176|517697	0.0407662	0.00929423	up	1.95487	1.95487	0.967074	ZNF280B	Bos taurus zinc finger protein 280B (ZNF280B), mRNA [NM_001077935]	TAAAAAATCTCAAGTTTATGAATCACATGAAGCACCATTTGGAACTTGAGAGGCAGAGAG///TCATCAGTCTTTGCAGATGTGGATGCACATTTCAGAGCATACCATGGTAACACTAAGAAT///CTGTGAACATATCTGATTCTGAACCATCACCCCCCAAATCTAAAAGTAGGAGTTCAAAAA
A_73_P049641,A_73_P270861|518466	0.0381042	0.00809437	up	1.95397	1.95397	0.96641	TMEM86B	Bos taurus transmembrane protein 86B (TMEM86B), mRNA [NM_001034528]	CTCCACATGTTGTGGCCCTGATTTATTCTGTTGCTTAAAGTAAAGTGGGCATTGAACCTG///TTCTGTGCCTCCAAATGCTCTCCACATGTTGTGGCCCTGATTTATTCTGTTGCTTAAAGT
A_73_119949	0.0303894	0.00503056	up	1.95378	1.95378	0.96627		Rep: UPF0472 protein C16orf72 - Homo sapiens (Human), complete [TC416483]	CAGGTCTTCACGTCTGCCAGAACACAATTTATATATTGGCTCCATTAAACTTTTGAAAAA
A_73_118016	0.0232739	0.00259022	up	1.95373	1.95373	0.966229		Rep: Zgc:110361 - Danio rerio (Zebrafish) (Brachydanio rerio), partial (4%) [TC458001]	CGCCAGAATAGACGGCACCTGGGATCTGAGTGGCCCACCAGGACCTTTCTGCATTCTTTA
A_73_P042091,A_73_P154382|613895	0.0202294	0.00165025	up	1.95357	1.95357	0.966112	TEX30	Bos taurus testis expressed 30 (TEX30), mRNA [NM_001076295]///Hw_Fat_47_050805_F08 Bos taurus CF-24-HW fat cDNA library Bos taurus cDNA, mRNA sequence [DV779494]	TGTCTCTTGAGAGTACTGTCATAGTTGTATAAAGATGATGTACAAATATTGAAGGTGGTC///TAATAGGGGTTTTTCTTTATAATAAAAAGAAAAGGTCCCTCCCCTGGTGGGAAGAAAAAA
A_73_103807	0.0262564	0.00367142	up	1.95252	1.95252	0.965337		Rep: inositol polyphosphate-5-phosphatase F - Bos Taurus, partial (44%) [TC426442]	CAAGTATTGGTTTGTCTGGTATCTTTAGAGCCTTACTCTGTTGAAGTGATTGTCAGCTAA
A_73_P033666|508365	0.0198435	0.00147607	up	1.95217	1.95217	0.965077	BCL2L14	Bos taurus BCL2 like 14 (BCL2L14), mRNA [NM_001015544]	GAAAGTGCGTGCCACATACTTGTTGACCTCATGAAGGTGAAATGATAAATGGTGCATGTG
A_73_P072951	0.034945	0.00678916	up	1.95207	1.95207	0.965005		valosin containing protein interacting protein 1 [Source:HGNC Symbol;Acc:HGNC:30897] [ENSBTAT00000008802]	GAGATGGATAGTCAAGATGCTGAGATGACAAACACAACTGAGCCAATGGATCACTCTTGA
A_73_P061466|359721	0.028398	0.00438018	up	1.95051	1.95051	0.963851	RTN3	Bos taurus reticulon 3 (RTN3), mRNA [NM_182657]	GAATGTGCTTTCCTCCCTCTTTCCTCCCCTCAAGTTCAATAAATATGGTTGTACTTTTCT
A_73_P406076,A_73_106618,A_73_P074391|535369	0.019308	0.00129308	up	1.94985	1.94985	0.963363	E2F1	Bos taurus E2F transcription factor 1 (E2F1), mRNA [NM_001206079]	TAAGAGCAAACAAGGCCCCATCGACGTTTTCCTGTGCCCTGAGGAGAGTGTGGGTGGAAC///GCGAGGCCTTGGCCTGCTTGTTGGCAGGACAGCGAGAGCACTTCTATCGTCTTAAAGGTT///GAGGGCATCAGAGACCTCTTCGACTGTGACTTTGGGGACCTCACTCCCCTGGATTTCTGA
A_73_P439926,A_73_P070061|525869	0.0231187	0.00253555	up	1.94928	1.94928	0.962942	RAI14	retinoic acid induced 14 [Source:HGNC Symbol;Acc:HGNC:14873] [ENSBTAT00000009296]	TATATCCATAAAGCGGAGCATGAGAAGCTGATGCAAGTGACCAATGTATCCAGAGCCAAG///TATCACTGTGACCCTTATCATAGAACTTCTTCCCTTTCCAGAGACTTCTGAGGACAGGTC
A_73_P152386	0.0223586	0.00226717	up	1.94911	1.94911	0.962814		Rep: WD repeat-containing protein 47 - Homo sapiens (Human), partial (12%) [TC436594]	GATTAAACATAGGTATTCAGAAATTACTTTTGCTTTTCTCACAACCCCTGAGGATACTGT
A_73_P096251	0.0174925	0.000857921	up	1.94667	1.94667	0.961011		Rep: Leucine-rich repeat and calponin homology domain-containing protein 3 precursor - Homo sapiens (Human), partial (5%) [TC422299]	TTATGTTTGCCTCTCCACATTTTAGAAGAGAAAGGTTTGAGCCAGGTTGCCATGACGGTC
A_73_P069266,A_73_P103631|508575	0.0203297	0.00168572	up	1.94623	1.94623	0.960682	G2E3	Bos taurus G2/M-phase specific E3 ubiquitin protein ligase (G2E3), mRNA [NM_001038671]///Rep: G2/M phase-specific E3 ubiquitin-protein ligase - Homo sapiens (Human), partial (43%) [TC397822]	GCTCTTCCTATCACCAGTACATATAAAGAATTTCAAGAAAGTATGGACTTCGCCATAAAA///GAACAAAATTGGGAATGTTGCGAATGTAGAAGTATTCTCTACAGTGCAGGTAATATTTTG
A_73_P040761|539222	0.0287829	0.00450457	up	1.94602	1.94602	0.960526	PBX3	Bos taurus PBX homeobox 3 (PBX3), mRNA [NM_001046453]	ATAATTTAAATGCTAATGGAGGCTGGCAGGACGCAACAACTCCATCTTCTGTGACTTCTC
A_73_P289031,A_73_107653|504437	0.0161901	0.000442584	up	1.94562	1.94562	0.960233	AURKA	Bos taurus aurora kinase A (AURKA), mRNA [NM_001038028]	TGCCTTGTCTTACTGTCATTCAAAGAGAGTTATTCACAGAGACATTAAAGCAGAGAACCT///GCCATGAGAATCGTGCTAATAACTTCACTGGTTATAGAATCAATCCGCAGGCAAGGTTTG
A_73_P148946,A_73_P473228,A_73_P079751|539224	0.0227166	0.00239296	up	1.94558	1.94558	0.960201	PAK6	Bos taurus p21 (RAC1) activated kinase 6 (PAK6), mRNA [NM_001192198]	AAAGCATCTTCCCGTTTGTGAATTGTTTGCACTTGTGCCTGTTTTAAATTAAACTGAGTG///ACATCTCCGGGCTGCTCAACGACATCCAGAAGTTATCAGTCATCAGTTCCAACACCCTGC///TGGAGAACCACCTTACTTCAGTGACTCCCCTGTGCAAGCCATGAAGAGGCTTCGGGACAG
A_73_106179	0.0442525	0.0107609	up	1.94511	1.94511	0.959849			GGTTTGCCCAAGGGTTTAGATGAGGAGCACTTTAAAACAAACTGGTTTGGTGTGTTTAAG
A_73_P354886,A_73_P267046,A_73_P051561|513324	0.0161901	0.000387725	up	1.94443	1.94443	0.959347	LETM1	Bos taurus leucine zipper and EF-hand containing transmembrane protein 1 (LETM1), mRNA [NM_001075614]	TGATGAGCTATGTGCCTCTTCCGTTGGGCAGCTGCGCTCCCGTCCACCCCGTGTACCTTT///TTCAAAGACTGGCGAAGAAATGTATGTGGAAGAGTCTAAAGCCAGCAAGAGGCTGACCAA///CCAACATTATGCTGATTGTTTTGAAGTGATCCTTAGTGACGGAACTAATATTTTATCAGG
A_73_110878	0.0262564	0.00367067	up	1.94422	1.94422	0.959193		Rep: Predicted protein - Botryotinia fuckeliana (strain B05.10) (Noble rot fungus) (Botrytiscinerea), partial (29%) [TC457297]	GGTGGAGAATGAATTCTTTACAGTCTTTTTTGGATGATCCCATTTGTACCACAGAAACAT
A_73_P080441|785849	0.0306754	0.0051482	up	1.94419	1.94419	0.95917	DCAF5	DDB1 and CUL4 associated factor 5 [Source:HGNC Symbol;Acc:HGNC:20224] [ENSBTAT00000028279]	ATCGAATTGGAAGACCCAGATTCGGAGAATTCCTCCTCAGAGAAGAAATTAAAAACATGA
A_73_P306466,A_73_P037491|531234	0.023143	0.00256596	up	1.94288	1.94288	0.958197	NCAPG	Bos taurus non-SMC condensin I complex subunit G (NCAPG), mRNA [NM_001102376]	CATTGCTCAGAGAGTAATGCTCCTTCAACAAGGTCTCAATGACCGATCAGATGCTGTGAA///GATGGAGGTGGAGTCCTTTGAAAAATGGCCTTTAAAATTATGTTCAGTTCTTTGCTTTAA
A_73_P112366	0.0453084	0.0112521	up	1.9426	1.9426	0.957986		coiled-coil serine rich protein 2 [Source:HGNC Symbol;Acc:HGNC:29197] [ENSBTAT00000023416]	TCTTCAGACACTTCCCCAGTCAAGTACAGATGACCAGGCTAAGAGAGTTGGAAGAAATCA
A_73_120547	0.0381042	0.00808378	up	1.94228	1.94228	0.957751		Rep: Predicted protein - Magnaporthe grisea (Rice blast fungus) (Pyricularia grisea), partial (5%) [TC430527]	CTCCTCAGAACTGCTTTCTTCATAAACATTAACTATATAAACCTGTGTTTGTTGCCCAAA
A_73_P264321,A_73_P061786,A_73_119306|540231	0.0493934	0.0130931	up	1.94215	1.94215	0.957656	FAM83B	Bos taurus family with sequence similarity 83 member B (FAM83B), mRNA [NM_001205795]	GGACAGTAAAAGGTCAAGATTATCTTTCCAAAACAGGGGCAAAATTTCATGGAAAAATGG///TTACAGAATGTGTAGTAGTTCTGACACCTTAATTTCTGAGGCTGAAGAGAATCAAAAACA///CATAACACTGTCAGCAGTCTTTTATACTGTGTCTTTGTGGGGTTTTCATATCTTCAAATT
A_73_P073961|529876	0.0389327	0.00849859	up	1.94058	1.94058	0.95649	WDR37	Bos taurus WD repeat domain 37 (WDR37), mRNA [NM_001205968]	AATTCCATAAAATTTCATCCATCAGAACAGTTGGCCCTCACCGCCTCTGGAGATCAGACT
A_73_P301976,A_73_101694|506122	0.0161901	0.000477811	up	1.93821	1.93821	0.954727	MTMR11	Bos taurus myotubularin related protein 11 (MTMR11), mRNA [NM_001035030]	AAACAAATACTACAATTCCGTAATCCTGGCTATGACCCAGAACACTGCCCAGATTCCTGG///TGAAATATACACGGGACACCCTATCTCTTCCAATTATCTATTTTCGTCGTGACATTTCTA
A_73_P354216	0.0296884	0.00480988	up	1.93788	1.93788	0.954476		Rep: PREDICTED: PHD finger protein 15 - Pan troglodytes, partial (24%) [TC413183]	CTTGAGGCTGCCACTCTGATGTGGTTTTATTTTTAATATAAAAAGTGTTGCGAATTCCAA
A_73_P321001,A_73_113241|510008	0.0371125	0.00765754	up	1.93753	1.93753	0.954219	FHL2	Bos taurus four and a half LIM domains 2 (FHL2), mRNA [NM_001046046]	TTCATCCCGAAGGACAGCGAGAACTTCTGCGTGCCCTGCTATGAGAGGCAGTATGCTCTG///CATCAGCGGACTGGGCGGCACCAAGTACATCTCCTTCGAGGAGCGGCAGTGGCATAACGA
A_73_P030351|505797	0.0223056	0.00223799	up	1.93753	1.93753	0.954219	TMEM30A	Bos taurus transmembrane protein 30A (TMEM30A), mRNA [NM_001075223]	CGACTTGCTAACCTTTCAGGATCCAGAGTTACAAAAAGATGAAGACCAAATCTAAATAAA
A_73_106347,A_73_P191942,A_73_P284211|534380	0.0188707	0.00117805	up	1.93749	1.93749	0.954191	FAR2	Bos taurus fatty acyl-CoA reductase 2 (FAR2), mRNA [NM_001076022]	CTTTCCAGGGCAGAAAACCCAGCTCTGAAAGAAAGCAGCTGGTTATCTTCAGTTTGAGAT///AAGAATCATGTCCATGATTGCAGCTTTCTATGGTGGCAAGTCCATTCTCATTACTGGGGC///TAGAGGAAGGCCCTAAGCTAAAATCACGTAAAAACCCATTTTTCCTGATATTTGCCACTG
A_73_P045531|768004	0.0254449	0.00335561	up	1.93683	1.93683	0.953695	ZNF572	Bos taurus zinc finger protein 572 (ZNF572), mRNA [NM_001077064]	AACCCCAAGGAATAAGCACAAAGGATTCAGCACCTGAATAAATAAAGCATTCTTATTAGC
A_73_P164792,A_73_P034441|511765	0.0313023	0.00536407	up	1.93682	1.93682	0.95369	ECSCR	Bos taurus endothelial cell surface expressed chemotaxis and apoptosis regulator (ECSCR), transcript variant 1, mRNA [NM_001244445]	AGTGTGGTCAGTCTAAGGTTTAAGTGTCGGAAGAACAAGGAGTCTGAAGATCCCCAGAAA///GCCAGAGCAAGGAGAATGACAAAATGAACTGATCCTTTTTCCTTGGCATTAAAGTTATTT
A_73_P041171	0.0415978	0.0096081	up	1.93678	1.93678	0.953662		Rep: SP140 protein - Homo sapiens (Human), partial (27%) [TC462863]	GTGAGAAAACCCAAGAAGAGAAGAAGTAAGAGTGCATGCAATTTTATTTGCTTTTGATAC
A_73_104289|533177	0.0199544	0.00154126	up	1.93521	1.93521	0.952491	SCARB2	Bos taurus scavenger receptor class B member 2 (SCARB2), mRNA [NM_001102153]	ATGCTGCCCAGAATGTTCTTCCTGTAGTTTATACTGCTGGTTCCTTTCATGTGATTCTTG
A_73_116159	0.0244115	0.002996	up	1.93466	1.93466	0.952081		PREDICTED: Bos taurus IKAROS family zinc finger 2 (IKZF2), transcript variant X7, mRNA [XM_005192257]	TGTACTGTCTGAGTGCACAGCTACTGGAATAAATTTAGGGAATCTCAGGAACAAGCATAT
A_73_113751	0.023534	0.00269587	up	1.93464	1.93464	0.952067		Hw_liver_70_050825_B05 Bos taurus CF-24-HW liver cDNA library Bos taurus cDNA, mRNA sequence [DV783722]	AATGACTAAAAGCCACTTCATCTTGGTTAACATTTTGGCCTTACGTTAGAGTACATTATG
A_73_103655,A_73_P251591|280986	0.0233733	0.00264664	up	1.9343	1.9343	0.95181	AGER	Bos taurus advanced glycosylation end product-specific receptor (AGER), mRNA [NM_173982]	AGCCCACATCTCCCAAACTTTCTTCCACAACCAGAGCCTCCCACAAAAAGTGATGAGTAA///AGAGCCAGAAGGGGGAGCAGTAGCTCCTGGTGGTACTGTGACCTTGACCTGTGAAGCCCC
A_73_P051966,A_73_P413311|517535	0.0110645	7.73366e-06	up	1.93359	1.93359	0.951283	HSPA9	Bos taurus heat shock protein family A (Hsp70) member 9 (HSPA9), mRNA [NM_001034524]	GAAACGGGCAAACTTCAGTCTTCTACTGTGTTTTTGCAGTATTCTATATATAATTTCCTG///AAAGCCATGCAAGATGCAGAAGTCAGCAAGAGTGACATAGGAGAAGTGATTCTGGTTGGT
A_73_103388	0.025577	0.00341386	up	1.93353	1.93353	0.951236		516764 MARC 3BOV Bos taurus cDNA 5', mRNA sequence [BM255117]	TTCTAAAAGAAAGCTCAGTCTTTTTCGCTACCAGATCAGGTTAGCACAGTATAGAGCACT
A_73_105118|505541	0.021831	0.00212116	up	1.93287	1.93287	0.950745	RASIP1	Bos taurus Ras interacting protein 1 (RASIP1), mRNA [NM_001193160]	AGGATGGGACAGTGGGAAAATGGGTTTGGGATTTGAGTGCCAGGAACAATAAAAGCATCT
A_73_P038541,A_73_P127621|615827	0.0255129	0.00338031	up	1.93249	1.93249	0.950463	CKS1B	Bos taurus CDC28 protein kinase regulatory subunit 1B (CKS1B), mRNA [NM_001113311]///C0009286O11.Q1KM13R KN510 Bos taurus rectum from E. coli unchallenged animals Bos taurus cDNA clone C0009286O11 3', mRNA sequence [FE008243]	CTGTCCTCACTTGCTAACATCTTCCTGATGACATTATTGTGTTGCCTTCTTGTTTCTCAC///GTATTTGTCCGAATAGTAAATTTGTTTGTGCGACATGATCACTCTGCCTGAGGACCTTCA
A_73_101378	0.0154489	0.00013859	up	1.93244	1.93244	0.950427			TAACAATTTGGGGTAAAAGTGTTTATTTGAGACTATCTTTTGTTTTTCTTGAGGGGGCAG
A_73_102335	0.0383817	0.00823507	up	1.93213	1.93213	0.950192		Rep: Nuclear factor 1 A-type - Homo sapiens (Human), partial (98%) [TC424554]	TCTAGCCAGCCAGCATACTTTGCCTTCCCCTATAGCACTTAGCTGGGCATTACTTTATTA
A_73_104420	0.023143	0.00256372	up	1.9321	1.9321	0.950172		carbonic anhydrase 9 [Source:HGNC Symbol;Acc:HGNC:1383] [ENSBTAT00000015174]	CTGTGCCCAGGGGGTCATCTGGACTGTGTTCAACCAGACAGTGAAGCTGAGTGCTAAGCA
A_73_104921,A_73_P266096,A_73_P047691,A_73_P176252|281363	0.0155841	0.000206657	up	1.93168	1.93168	0.949859	NT5E	Bos taurus 5'-nucleotidase ecto (NT5E), mRNA [NM_174129]	GGCAGTGATCATTATTTTATACCAATAGCCAAAAATTCTCCTTGCCATTAAATGGAACTG///ACACTCTGGTTTTGAAGTGGATAAACTCATTGCTCAGAAAGTGAAGGGTGTGGATGTGGT///GGCTACATTTTTTATGCCTGGCCAGTAAAATAGGGTAAACCCTATTGAAACACAAATTTT///ATGGGAAGGTGTCACAAGAAGAGAACCTTCTTAGAGAAGGTGTAATTCTAAACCTGCACC
A_73_P035436|540228	0.0319239	0.00564305	up	1.92996	1.92996	0.94857	PRMT6	Bos taurus protein arginine methyltransferase 6 (PRMT6), mRNA [NM_001014962]	TCAGTCTCCCTTCCAGGAGATTCTTCTGGCGGTATTTATTAAAAAATGTTTTCAATCCCC
A_73_P073106,A_73_113447|519993	0.0397987	0.00886224	up	1.92936	1.92936	0.94812	LRP12	Bos taurus LDL receptor related protein 12 (LRP12), mRNA [NM_001192981]	TCTTGCTTAGAAGCAACGCTGAAAACTGAAACGAGTGATGATGAAGCTTTGTTACTTTGT///TTATTTTGCCCTTGAAAAAATTGACGTATCTTAGAAGATTCAGTAACTCTAGCAGCTCTC
A_73_P110346,A_73_116270|286872	0.0298916	0.00486782	up	1.92922	1.92922	0.948018	MSX1	Bos taurus msh homeobox 1 (MSX1), mRNA [NM_174798]	GGTGGCTCTCAAGATTCCCTTTGGAAGGGATTGTTGTAATATACTGTATATTTGAAATTT///CTTCTGTTTCTATTTAACAGTACATGTGGGTGGCTCTCAAGATTCCCTTTGGAAGGGGAT
A_73_P051841,A_73_P498251,A_73_P251666|529873	0.025409	0.00334906	up	1.92849	1.92849	0.947474	CADM1	Bos taurus cell adhesion molecule 1 (CADM1), mRNA [NM_001038558]	ACAGCTATAATCAATGCAGAAGGAGGACAGAACAACTCTGAAGAAAAGAAAGAGTACTTC///GTGTCGCTGACAAATGTCTCCATTTCTGATGAAGGAAGATACTTCTGCCAGCTCTACACT///TAATCTGATGATCGACATCCAGAAAGACACTGCGGTGGAAGGTGAGGAGATTGAAGTCAA
A_73_102832|523694	0.021831	0.00212	up	1.92844	1.92844	0.947434	SELENOW	Bos taurus selenoprotein W (SELENOW), mRNA [NM_001163225]	CCTCTCGGCAGACGCTTCATGACAGGAAGGACTGAAATGTCTCTTGGACGCCTGGTCCTT
A_73_111589	0.0332917	0.00617722	up	1.92825	1.92825	0.947289		Rep: Cytoplasmic activation/proliferation-associated protein 1 - Homo sapiens (Human), partial (35%) [TC411392]	TACTAGAATGTAAGCTCCACGAGAGCAGGTACTTTGTCTGTCTTCACTGCTGTATCTATT
A_73_P040736|618044	0.0213396	0.00199821	up	1.92817	1.92817	0.947232	WFDC2	Bos taurus WAP four-disulfide core domain 2 (WFDC2), mRNA [NM_001076490]	TTGAAATGCTGCGTCAATGGTTGCGGGAGGGTGTCCTGTGTCACCCCTGTCTTCTGAGCT
A_73_112653	0.0198733	0.00149189	up	1.92776	1.92776	0.946923		Rep: LOC534455 protein - Bos Taurus, partial (56%) [TC395371]	TTTCTGGAAAATAAGCAGCAGCAGCAGCAGCATGCTATTTGCGTTTCTAAAGAGAAAACA
A_73_P135311	0.0155841	0.000165779	up	1.9274	1.9274	0.946657		PREDICTED: Bos taurus teashirt zinc finger homeobox 3 (TSHZ3), mRNA [XM_015467408]	CTATGTATAAAATATTGGCATGTAAACAGCACAGACACTCTGTGCCCTGTTTTGTTGTTG
A_73_P226857,A_73_P416091,A_73_111747|514679	0.0242331	0.00293209	up	1.92711	1.92711	0.946435	KIF20B	Bos taurus kinesin family member 20B (KIF20B), mRNA [NM_001105258]	GGAACAAAAGGTTTCCATACGCCCATCATCTAAGAAAACTTATTCTTTACGGAGTCATGC///TGTGAAGTGTCGACAGAAAATAATCAAAGCACTCGATTTCCAAAACCTGAGTTAGAGATT///GTTGCATCAAATCCCTTTGTATATACATTGGTATTTTATACTGGTATAATTTTAATTCAA
A_73_P081976|516422	0.0236653	0.00275164	up	1.92688	1.92688	0.946267	ADRA2B	Bos taurus adrenoceptor alpha 2B (ADRA2B), mRNA [NM_001206628]	TATTCTTGCCTCCAGCATTGGATCTTTCTTTGCACCCTGCCTTATCATGATCCTGGTCTA
A_73_P337436,A_73_104893,A_73_P278011|504584	0.0242444	0.00294612	up	1.92395	1.92395	0.94407	ALDOC	Bos taurus aldolase, fructose-bisphosphate C (ALDOC), mRNA [NM_001097984]	AGACGATAATGGTGTCCCCTTCGTCCGCACCATCCAGGATAAGGGGATTGTCGTGGGCAT///TAGGGCAGCAGAGCTGACTCATGCTTTGTGTGCATACCACATAGCAAATAAATGGTAGCA///TTGTGCCTATTGTGGAACCTGAGATTCTGCCTGATGGAGACCATGACCTCAAACGTTGCC
A_73_109181|540584	0.0243194	0.002974	up	1.92383	1.92383	0.943982	FAM126A	family with sequence similarity 126 member A [Source:HGNC Symbol;Acc:HGNC:24587] [ENSBTAT00000006008]	TTCTGAAAGGACTGAACTTCCAATGAAGCATCAAGCAGGTCAGCAGAGACCTCCTAGTAT
A_73_P374551,A_73_P314847,A_73_110632|514554	0.0296477	0.00479177	up	1.92358	1.92358	0.943792	PLD1	Bos taurus phospholipase D1, phosphatidylcholine-specific (PLD1), mRNA [NM_001102001]	TAAATTCTTCAAGGAGGTGTGGGTTTCAACAGCAGCTCGAAATGCTACAATTTATGATAA///GCATATACCCAACAGCATCAACACATATTTCAATTCTGTGGTGTATATCAAAGTGCATTT///CCGGTGCCTTCCCAATGATGAAGTACACAATTTAATTCAGCTGAGAGACTTTATAAGCAA
A_73_P452801	0.0205525	0.00174013	up	1.92355	1.92355	0.943768		Rep: Leucine-rich repeat-containing G-protein coupled receptor 6 (VTS20631). - Bos Taurus, partial (97%) [TC448602]	CCCCTCCATGGATGATGCTGCTGCCTGTAAAATAAATCAGGATGACCCAGAGTGACCCAC
A_73_117696	0.0335796	0.00629855	up	1.92332	1.92332	0.943602			TGTTCAGGTGATAACTGAGCCTCAATCAAGCAGAAACTTTTTGCTTGACATTAAAAGAAA
A_73_P258586,A_73_116262,A_73_P508653,A_73_113308,A_73_P256791,A_73_P373251|359718	0.0201908	0.00163263	up	1.923	1.923	0.94336	RTN4	Bos taurus reticulon 4 (RTN4), transcript variant 2, mRNA [NM_001113221]///reticulon 4 [Source:HGNC Symbol;Acc:HGNC:14085] [ENSBTAT00000014745]	CTGCTATGTATGGATTTAAATCGTAATCATATTTGTTTTTCCTGTATGAGGCACTGGTGA///TGCATGTGATTTAATTAAAGAAACAAAGATCTCTACTGAACCGACTCCAGATTTCTCTAG///ATGACCTGTCTTGACTGCCCTGTGTTCATCATCTTAAGTATTGTAAGCTGCTATGTATGG///CAATTGTGGTTTAAGCTGTATTGAACTAAATCTGTGGAATGCATTGTGAACTGTAAAAGC///GAATAAACAAAGATCTGAGAAAGCTGTATATTACACTTTGTCGCAGGTAATCTTGCTGTA///TTCTGAAATGGAAATGTTTAGACCGAGATCATGCCACCAAGGCAGGAGGGAAAAAGCTTG
A_73_111751	0.0301892	0.00495924	up	1.92242	1.92242	0.942924			GTGAGTTTATCATGGTTGTATGAGTATTTAAACCACTAGGGACATACCTCAATATTTTCC
A_73_P446936,A_73_P089751,A_73_P106231|516644	0.0236451	0.00274389	up	1.92037	1.92037	0.941386	NCAPG2	Bos taurus non-SMC condensin II complex subunit G2 (NCAPG2), mRNA [NM_001192449]	TTTACAAGCTATACAAGCCCATCCTTTGGAGAGGATTAAAGGCCAGAAACTCGGAAGTCC///ATGTATCATATTGCTTGCAGACTCTGAGTAATAAAGTGGTGGCAACACCTGTTTGTGTAC///AAAGTTAAGGCTGTGAGGGCTGCTAAGTTTTGGAAAATATGCCCCATGGAGCACATTCTG
A_73_108289	0.0154489	0.000143427	up	1.92034	1.92034	0.941364		Rep: PREDICTED: interferon regulatory factor 2 binding protein 2 isoform 1 - Pan troglodytes, partial (85%) [TC443177]	TTAGAGCACTTGGCAAAGCAGAAACGCTTCTAGCTGTATTTGTATGCACTTATTTTAAAA
A_73_P123741	0.0253961	0.00334254	up	1.92008	1.92008	0.941167		1IL21B10 Bos taurus Ileum #1 library Bos taurus cDNA, mRNA sequence [CB221878]	AAGCAAACAGGATAGTGTGATAAATTACCCAACAGCTTCACCAAACTTTATGTTGACTGG
A_73_114542	0.0362041	0.00731784	up	1.91827	1.91827	0.939805		LB0266.CR_C23 GC_BGC-26 Bos taurus cDNA clone IMAGE:8211793, mRNA sequence [DV884856]	TGCACTGTGTCTTACCTTCCCCGGGGCCAGCACTGCCTCCAAGATTGATCTTGAGTCTGT
A_73_118501	0.019192	0.00126289	up	1.91787	1.91787	0.939507		Rep: FK506-binding protein 9 precursor - Bos taurus (Bovine), complete [TC393745]	AATGTTAACTTGCTGGTGTTTTCAAAGTGTTCTCCAGGTGGCTAGAAAAGAGAGGGCAGG
A_73_119169,A_73_P107696|539542	0.0429582	0.0102358	up	1.91736	1.91736	0.939119	HHEX	Bos taurus hematopoietically expressed homeobox (HHEX), mRNA [NM_001105424]	TTGCCTTAAATCCAGAGCTATCTCTGAGTTCTTGTCTGGGGGATGTAGGTATCTTTTTGT///AACTGGAAAGTTTGGACAATTCTTGCGACCAGAGGCAAGACTTGCCTAGTGACCAGAATA
A_73_P296066,A_73_P393096,A_73_P035611|535043	0.02068	0.00180161	up	1.91694	1.91694	0.938801	ITGA6	Bos taurus integrin subunit alpha 6 (ITGA6), mRNA [NM_001109981]	TTAACTGCCTTAATTTAACGTTCCGGGTTGCCTTTGTTTTTGACTTACTTGTGCTGGGGA///TATTGCGGTTGGAGCACCCTATGATGGTAAGGGGAAGGTTTTTATCTATCATGGATCTGC///GGTTTCATTTCCCTTTCACTAAAACACACAGGCATAACAGATTTGAATGCTAGTTATACT
A_73_P033656,A_73_P247666|528100	0.0234406	0.00266764	up	1.91623	1.91623	0.938269	SERP1	Bos taurus stress associated endoplasmic reticulum protein 1 (SERP1), mRNA [NM_001114083]	AGGTTTCTTCACAAGTCATTCCGAGTTTTCTAGTCCATACCACAGTGCCTTGCAAAAGCA///TCCTGGTTAAAAACAATTCAGTAAAGCATCCTGCCTCAGAATGACTGTTCATATCATCCT
A_73_118034,A_73_P384941,A_73_P096596|528478	0.0180787	0.000974715	up	1.91611	1.91611	0.938183	PRKCI	Bos taurus protein kinase C iota (PRKCI), mRNA [NM_001205955]	ACTGACTATGGCATGTGTAAGGAAGGATTACGGCCAGGAGATACAACTAGCACTTTCTGT///GTATCAACTGCAAGCTCCTGGTTCATAAGAAGTGCCACAAACTTGTCACAATTGAATGTG///TCTGAATTTGAAGGTTTTGAGTACATTAATCCTCTCTTGATGTCTGCAGAAGAATGTGTC
A_73_106938|282376	0.0332546	0.00614958	up	1.91599	1.91599	0.938091	STAT5B	Bos taurus signal transducer and activator of transcription 5B (STAT5B), mRNA [NM_174617]	CTCGTCGCCATCTCTAGCTTCTTCATCCTTGCCAGAGGAGTTACTTTTGTGGATGTTTTA
A_73_P133516	0.0300668	0.00492292	up	1.91594	1.91594	0.938054		Rep: Semaphorin-3F precursor (Semaphorin IV) (Sema IV) (Sema III/F). - Canis familiaris, complete [TC403827]	TTTCCTGGGTATTTATTCTCTATTTATTGGGGATAGAAGAAGAGGAGCCCTGCCTGGGTG
A_73_P071831|532324	0.0332165	0.00612994	up	1.91561	1.91561	0.937804	CHML	CHM like, Rab escort protein 2 [Source:HGNC Symbol;Acc:HGNC:1941] [ENSBTAT00000014310]	GAAGACATTTTCTTTGACGGTGATGAAAAGCCATCAGAGCCTCTTGGAACCAATAATATA
A_73_101185,A_73_P297471|515158	0.0332917	0.00618029	up	1.91556	1.91556	0.937767	SPDL1	Bos taurus spindle apparatus coiled-coil protein 1 (SPDL1), mRNA [NM_001076854]	ATTGTCTTTATCTGAGGATACCTTCTTGCAGCCTATTTTCCTTCTACTCATTGTGCCGGG///AGAGCGAGAGAAAGAAGCGGTTTCTTACTATGATGCCTTAGAGAAAGCTCGTGTAGTGAA
A_73_P426381,A_73_112618|534712	0.0332973	0.00618301	up	1.91394	1.91394	0.936543	RB1	Bos taurus RB transcriptional corepressor 1 (RB1), mRNA [NM_001076907]	TAGGTTTCATACCTCAGGACTTGTAAGAGTTTATTGATCCTTTTCTTTATCCAACTCATG///CTTCATGTTAGAATTGGTGTCAGAATTTAAGGAACTTCAGAGATCGTGTATTGAGATTTC
A_73_102967,A_73_P485463|616028	0.0372319	0.00777081	up	1.91219	1.91219	0.935226	NUSAP1	Bos taurus nucleolar and spindle associated protein 1 (NUSAP1), mRNA [NM_001046571]	TGTTGTACCTGAGTGGAGTGTCTGTGTTTTGTACGGCTTGAGATTTTCATGAATAAAATT///ATAAAAAACCAGTGTTTGATCTCAAAGCAAGTTTGTCTCGTCCTCTCAACTATGAGCCAC
A_73_115229,A_73_P058206,A_73_P457711|518795	0.0435337	0.010495	up	1.91202	1.91202	0.9351	SOCS1	PREDICTED: Bos taurus suppressor of cytokine signaling 1, transcript variant 2 (SOCS1), mRNA [XM_864316]///suppressor of cytokine signaling 1 [Source:HGNC Symbol;Acc:HGNC:19383] [ENSBTAT00000005753]	AAACCAGGGGTTGGGGAGGGTCTCTGGCTTTATTTTTCTGCTGTGCAGAATCCTATTTTA///ACCTTCCTGGTGCGCGACAGCCGACAGAGGAACTGCTTCTTCGCCCTCAGCGTGAAGATG///TATACTCAGTATCTTTGCACAAACCAAGGGTTGGGGAGGGTCTCTGGCTTTATTTTTCTG
A_73_113635,A_73_P050361|616923	0.0259596	0.00354276	up	1.9115	1.9115	0.934704	VAMP4	Rep: Vesicle-associated membrane protein 4 - Bos taurus (Bovine), complete [TC398831]///Bos taurus vesicle associated membrane protein 4 (VAMP4), mRNA [NM_001076438]	CATGCTGAAAGATGTGTATAACCATTCCATCGATATTTGCAAGATTCCTCTCATATTAAC///GGCTTTGGTTGCTGTTATCCTTTTGTTAGTGATTATCATTCTTATAGTTGTGAAATACCG
A_73_P458666,A_73_P390066,A_73_105842|327676	0.0162102	0.000536107	up	1.91082	1.91082	0.934194	ARHGDIB	Bos taurus Rho GDP dissociation inhibitor beta (ARHGDIB), mRNA [NM_175797]	TCAAAGTGAACAAGGATATTGTGTCAGGACTGAAGTATGTTCAACACACCTACCGGACGG///AAAGATGATGAAAGTCTAACTAAGTACAAGAAAACGCTCCTGGGGGACGGTCCTGTGGTA///CTGCCAACTGGGGGTTTTCTTTTCTGGGAGACACTGTAAACAGCACAAGAGAACAAGAAT
A_73_P044391,A_73_P340121|281562	0.0314661	0.00543192	up	1.91022	1.91022	0.933739	UCP2	Bos taurus uncoupling protein 2 (UCP2), mRNA [NM_001033611]	TTTCTCCGCTTGGGATCCTGGAACGTGGTGATGTTCGTCACCTACGAGCAGCTGAAGAGG///TCTCCAGTTTTTGTTCATCTCCTGGGAGGTTGCAGGAATCGTCATTATGGTTGGGTTCAA
A_73_109017	0.0199042	0.00150557	up	1.91014	1.91014	0.933676		Rep: UPF0491 protein C1orf80 homolog - Macaca fascicularis (Crab eating macaque) (Cynomolgus monkey), partial (5%) [TC415655]	CACGTTGATTAGCTTTTTTCCTACATCACATTGTTATTCTTTCTGATAGTGATTCTAGGG
A_73_P373301,A_73_P339471,A_73_108872,A_73_P414386|504585	0.0295806	0.00474727	up	1.90937	1.90937	0.933098	SPAG5	Bos taurus sperm associated antigen 5 (SPAG5), mRNA [NM_001205549]	CAATTTCTGAGCTAAGAAACTGAAAGCTGGAGTCTGTTGCACCCCTTTTTACCTGCAACA///TACCCCAACATCAGGACCAATTGGCTTAGAGCCAGCTCTGTTTATAAAATAAAGTATATT///GGCAGATGAAGACCCAGAATCTACTCCTGTGCCCTTGCTTGGAAGTGACAAGAGTGCCTT///TGGAAAAAGGTGTCAATACCTCAGTCATGCTAGAAAATCTCCGCCAGAGCTTATCCCTTC
A_73_P162817,A_73_P380131,A_73_105494|539087	0.0197036	0.00142828	up	1.90713	1.90713	0.931406	C7H19orf66	Bos taurus repressor of yield of DENV protein homolog (C7H19orf66), mRNA [NM_001038181]	AGTGACAAGATGTGGGGCGTGGCTGAATTCCACTGCCCGAAATGTCGACACAACTTCCGG///TGGAAGACCTGGACAACCTCATTCTGGAGGACCTGAAGGAGGAGGAGGAGGAAGAGGAGG///CCCTGCCAGATGCAGATGCAAACCAGACACGGTCTGTGGCTATTTTGTGTTGTTATAAAA
A_73_P436020	0.0338849	0.0064035	up	1.9071	1.9071	0.931383		Rep: Ankycorbin (Ankyrin repeat and coiled-coil structure-containing protein) (Retinoic acid-induced protein 14) (Novel retinal pigment epithelial cell protein). - Canis familiaris, partial (5%) [TC476856]	TTAGTATGACACTAGTTATGCACTATGTGCTTAAGATCCTTTATTGTGATATCCTGTGGA
A_73_P391961,A_73_105034,A_73_P072316|540692	0.0428549	0.0101562	up	1.90584	1.90584	0.930425	RASAL2	RAS protein activator like 2 [Source:HGNC Symbol;Acc:HGNC:9874] [ENSBTAT00000020658]	GAACTGAAGAAGGATCATGCTGAGATGCAGGCAGTTATTGATGCAAAGCAAAAAATAATC///CAGACAATATTTTCTGGGGTGAACATTTTGAGTTCTACAGCCTTCCACCTCTTCATAGCA///AAAGCAAAAAATAATCGATGCACAGGAAAAACGGATCGTGTCGCTGGATTCGGCCAACAC
A_73_P074186,A_73_P139501|519624	0.0359502	0.00722307	up	1.90523	1.90523	0.929965	STX16	syntaxin 16 [Source:HGNC Symbol;Acc:HGNC:11431] [ENSBTAT00000005055]///PREDICTED: Bos taurus syntaxin 16, transcript variant 2 (STX16), mRNA [XM_866367]	TGGATACTGCTGCGGAATAGAGATGAGTTCTCGCTTTGGTTTTGTTTTGTTTTGTTTTGT///TGGCTTCTTAAAGGTAATAAAAACCTTCCAACCTAATTGGTCAGATAAGACTTTTGTGTG
A_73_120007,A_73_P101006,A_73_P317791|280831	0.018989	0.001214	up	1.90506	1.90506	0.929837	JUN	Bos taurus Jun proto-oncogene, AP-1 transcription factor subunit (JUN), mRNA [NM_001077827]	ACTGTCGGGGGCTGAGGGGCAACGGAGAAAAAATATAAATAACACAGACAGATTTGAGAA///TACGGCTACAGTAACCCCAAGATTCTGAAGCAGAGCATGACCCTGAATCTGGCCGACCCG///CCAGCCTTGTTTGTAAATAAGAGATTTGGAGCACTCTGAGTTTACCATTTGTAATAAAGT
A_73_P069321,A_73_P097281,A_73_P420171,A_73_P506948,A_73_P292131|540621	0.015973	0.000354534	up	1.90503	1.90503	0.929811	BAZ1A	Bos taurus bromodomain adjacent to zinc finger domain, 1A (BAZ1A), mRNA [NM_001192940]	TTCAGGCTCAAAAACTTGGACTCCATGTCACATCTGGGAATGTGGATCAAGTTAGCACAC///TTCCGGGAGTTAAAAGCAGAAAACATCGAAAAGAGAGGGAAGAAGCAGCTGCTAGAATTC///TAGATTGCCAATTAAAACAAGAGGGAGACTGAGCTCTTCTTTCTCAAGTCGTGGCCAACG///ACCCATCGTTCACGCTTGCATGAAATTTGGGATGATATTTTTGCATACATCAAAGATCGA///ACAGACCGACACCTCTGGAGGTCAGCATTAGAAAATGGACAGTATGAGCTGTTAAATGAG
A_73_P035741,A_73_P189207|506157	0.0157737	0.000306988	up	1.90453	1.90453	0.929433	ERP44	Bos taurus endoplasmic reticulum protein 44 (ERP44), mRNA [NM_001035032]	CAAGCCTTTCAAACAGCAGCATCAACTTACATGGTGGAAATAGTAAACCTATATTTTCAT///TTTCAAAACCAGAAAGATACAGTGGAGACAACATAGTCTATAGGCCACCAGGGCATTCTG
A_73_113748|506646	0.0317195	0.00554978	up	1.90273	1.90273	0.92807	SUDS3	Bos taurus SDS3 homolog, SIN3A corepressor complex component (SUDS3), mRNA [NM_001098891]	ATAAGAGCCAAGCCATCTATCTGGAATCGAAGGACAACCAGAAACTGAGCTGTGTGATCA
A_73_P297766,A_73_104129|532775	0.0389046	0.00848092	up	1.90265	1.90265	0.928008	TMEM38A	Bos taurus transmembrane protein 38A (TMEM38A), mRNA [NM_001083463]	AGTTTAGATCTTTTGTGTTTGTGGCTTGGAGAGCCCCACAAGTTACCTGGAACAAAGGAG///GGAGCTTGGTGGGTCCTGAGGCTGTAGGGCCCCCAAATTCCTCCTCTTGTATGTCTATCA
A_73_P069021,A_73_106267|527607	0.0213757	0.00200402	up	1.90251	1.90251	0.927907	EFL1	elongation factor like GTPase 1 [Source:HGNC Symbol;Acc:HGNC:25789] [ENSBTAT00000047037]	AGTTTGAAGAACAGACAGCAAGTAATAAACAGAATCAAGAACCGGGTGATCTGGTGAAGG///CCAGGCTTTGATACTGGGAAATTTTCTTTATGCTGCGTCATCGCTGTGCATTCACTTTCA
A_73_P379351,A_73_P379616,A_73_120418|511328	0.0229632	0.0024432	up	1.90242	1.90242	0.927835	B4GALT4	Bos taurus beta-1,4-galactosyltransferase 4 (B4GALT4), mRNA [NM_001038078]	ATTTTTCAAGGTGAATGGATTCTCTAACAACTACTGGGGATGGGGAGGCGAAGACGATGA///GAGAAGATGTATTTCTGTTTGAAGTGATACATATATTCTGGAATGAAAAAGGCCATGGGA///GGGCATTTTTGTAAAATCATTTTGTACGTGTAGGGTATGATGTAGCAGTTTACAAATTGC
A_73_107360	0.0308429	0.00521961	up	1.90156	1.90156	0.927181		Rep: Predicted protein - Aspergillus oryzae, partial (7%) [TC424482]	GTCATGCTCACACTATAGTGTAGTCTGTTAAATGCACACTAGTGTTAATGTCTAAAAAAC
A_73_115619|507522	0.0194515	0.00134099	up	1.90127	1.90127	0.926965	NPHP3	Bos taurus nephrocystin 3 (NPHP3), mRNA [NM_001192152]	TCATCAAGGACAAAGGTGATAGCAGCAATTACCACTCACTGGAAATGCACCTTAGGATAA
A_73_111651	0.0197391	0.00144524	up	1.901	1.901	0.926758		Rep: Exportin-5 (Exp5) (Ran-binding protein 21). - Canis familiaris, complete [TC464232]	TCATGCTAGAAGTTTTCTATTGTTTATATAACTTTTTTGTAGAAACATTTAACTGAAGCA
A_73_109635,A_73_P055506|507695	0.0198755	0.00149863	up	1.90001	1.90001	0.926005	FAM101A	Bos taurus family with sequence similarity 101, member A (FAM101A), mRNA [NM_001205617]	GCGTGGTCTCTCCACAAAGATGCTTTCTGATTAACAAAGAAATAACTTAAGGAATGACTG///ATAGACACATCTATTTTATCAGCACCTATTTGGGAAGACAACTTGGGCCTGGCTCTCGGA
A_73_P305171,A_73_115111|530484	0.0321953	0.00575561	up	1.89961	1.89961	0.925703	ABHD18	Bos taurus abhydrolase domain containing 18 (ABHD18), mRNA [NM_001102129]	ACGGACCAAGTTGTGTCCCAAAAACCTGTTGAGTGCCATAAATCTAGTAAAACATCTATC///CGATATCTAGAAGGGGGTCATATTAGTGCTTATCTTTTTAAACAAGGACTCTTCAGGCGA
A_73_P048011,A_73_P206512,A_73_108499|540436	0.0215921	0.002058	up	1.89877	1.89877	0.925067	HID1	Bos taurus HID1 domain containing (HID1), mRNA [NM_001076924]	TGTGTCTGTACAATCTTTGCTCTGTACAATCGGCCTCTTGACATAATAAAACCCCCCTCT///TTTGCTCACTCTCCCCAGCCCAACTACATCCATGACATGAATCGGATGGAGCTGCTGAAA///CATCCTCATCCGCAAGTACCAGGCCAACTCGGGCACGGCCATGTGGTTCCGCACCTACAT
A_73_119079	0.027935	0.00423216	up	1.89853	1.89853	0.924882		PREDICTED: Bos taurus cell division cycle 25A (CDC25A), transcript variant X1, mRNA [XM_005222839]	ATACCAGCTCAGCTAGCATTGCTAACCAACTGTTGCAGGCTCTGAAAATAAAAACAATCT
A_73_P432856,A_73_106493,A_73_P306841,A_73_P076121|536988	0.025409	0.0033499	up	1.89843	1.89843	0.924805	CAPN5	Bos taurus calpain 5 (CAPN5), mRNA [NM_001192894]	ACGCTTGGCAAGAGATGGTAAATCCACTACCTGACCAGAGGCACCTCCACCAACATTCCC///GTGCTGAATAAGGGCAAAACAGTACCCTTTCTCTGTATATCTCTGTATGCGTATGCACTA///TTTTTATTCAGAGGAGATTTGCCAAATGAGTAAACATGTCCGTGAGACCCCCGATGGAGC///ATCTTTGATGTCAAAAAGCCCGAAGATGAAGTGCTGATTTCCATCCAGCAGCGGCCAAAA
A_73_P342641,A_73_101912|518833	0.0261548	0.0036204	up	1.89753	1.89753	0.924125	CYFIP2	Bos taurus cytoplasmic FMR1 interacting protein 2 (CYFIP2), mRNA [NM_001205850]	ATCCATTGACTTGAACAGACTCATTACCCAGCGCATCTCTGCTGCCATGTATAAATCCTT///CCTCTGCATGCTCTCCCGTGACATCTCCATGGTGGTGTTTCCATAGTGTAAATGAAAAAA
A_73_P058946	0.02068	0.00179042	up	1.89654	1.89654	0.923366		forkhead box K1 [Source:HGNC Symbol;Acc:HGNC:23480] [ENSBTAT00000025710]	AGTTAACTTCTGTTCCCGAGTACCGCTATTCCCAAAGCGCACCTGGCTCTCCGGTCAGTG
A_73_P031576|509798	0.0233	0.00259953	up	1.89631	1.89631	0.923197	RBMS2	Bos taurus RNA binding motif single stranded interacting protein 2 (RBMS2), mRNA [NM_001034365]	GCAGTCAAGGACATCAACAAAACTTCTTTTCTTTTGTGAAGAAAGTTTGCTGTTTTGCTT
A_73_102199	0.0269007	0.00386489	up	1.89624	1.89624	0.923144		Rep: Endonuclease/reverse transcriptase - Sus scrofa (Pig), partial (7%) [TC418671]	AGGACCACTGTCTTTTGCCCTTTATATGTTCTTCCTTTAGGATCATTTCAGGCCTTATGT
A_73_P041726|509423	0.0244161	0.00300063	up	1.89591	1.89591	0.922889	PLEKHA3	Bos taurus pleckstrin homology domain containing A3 (PLEKHA3), mRNA [NM_001101913]	CTGTCCTTCGTATATGAAGTTGACACTACTGACTTATCAATACCAAATGTTGTGTTAAAG
A_73_P095576,A_73_107084,A_73_P255271|510683	0.016629	0.000646799	up	1.89567	1.89567	0.92271	PINK1	Bos taurus PTEN induced putative kinase 1 (PINK1), mRNA [NM_001099701]	TGTGGAAACAAAAATGAAGATGCTATTTCTGGCCAACCTGGAGTATGAAGCGCTGAGCCA///GTGGCTTTGTCTAACTGTGTGATTCTGATGCATCATCCAAGTTCTCTTACCTGTGAAATG///TAAAAGGTAAAAACCATTTTTAGCTTGCAGGCCTGCAAAAATCAGGCAGCAAGCCAGACC
A_73_P328636,A_73_P345956,A_73_105849|533720	0.0208229	0.00184261	up	1.89398	1.89398	0.92142	SWAP70	Bos taurus SWAP switching B-cell complex subunit 70 (SWAP70), mRNA [NM_001080297]	AAGAAGAAGAAACAAGAGTGGATTCAGGCCATCCATTCTACCATCCATCTCCTGAAGCTG///GTGAATGCTTGTCCTAATCAGACCTTTGCCTTAATAAACAGCAATATGATCATTCCTAGA///GCTTTTCTGCTTCTAATCCAGTGCCTCCTGTGGGGTCAGTATACTAAAGAAGCCTTCTTA
A_73_116162,A_73_112600|509863	0.0255153	0.00338558	up	1.89341	1.89341	0.920985	SESN2	Bos taurus sestrin 2 (SESN2), mRNA [NM_001024507]///Rep: Rufy1 protein - Rattus norvegicus (Rat), partial (28%) [TC448422]	ACCTGGGTTCAAATCATAACACTATCACTTGGGAGCTCTGTGATCTTGGGCAGGTCATTT///GAAGAGGCCCCAGCATTGGGGTTTGGATTCTAGAGGGGACATGATGACCGTCAGGGTCAA
A_73_105277	0.0196059	0.00137524	up	1.89289	1.89289	0.920593			TTTAACTATACATTGTCCCCAAAGTGCCTGTGCATTGTGCAGAAAAGAAACCTGGGTAAC
A_73_P494408	0.0230447	0.00248792	up	1.89224	1.89224	0.920099			GTCACCAAGGCAGTTCATGCATATTTAGGTTACCTTCACCTTTTCTATAATTTGTAACAA
A_73_P042421|532659	0.0199544	0.00153921	up	1.89167	1.89167	0.919663	LRRC59	Bos taurus leucine rich repeat containing 59 (LRRC59), mRNA [NM_001034578]	TTGTTATACAAAGCTGTGTAAAGGCAAGACGCGTTTCTACTAAAGGTCAGCTGTCACTAC
A_73_111901|529631	0.0494593	0.0131411	up	1.88918	1.88918	0.917759	RUNX1	Bos taurus runt related transcription factor 1 (RUNX1), mRNA [NM_001256578]	CAGCGGCATGACGACCCTCTCAGCCGAGCTTTCCAGTCGACTTTCAACTGCGTCCGACCT
A_73_P096831,A_73_P421066,A_73_P323336|783104	0.0250784	0.00323427	up	1.88858	1.88858	0.917305	HPS3	Bos taurus HPS3, biogenesis of lysosomal organelles complex 2 subunit 1 (HPS3), mRNA [NM_001191177]	GCAGTCCAGAACTCAACCTTCTTGATTTTTCCAGATTTTTCTACTGTGTCACTTTTAAAA///AGAAGATACTGTTGCTGGCCTCAGTGTCCATGTTCTGTGTCATACGCGTTTGAAAGAGTA///GTTGCTGAGCCTCTTTTGTTTTTTCTCATTACCTCATGTGGGCTACCTGTACATGATTGT
A_73_P251876,A_73_109798|509121	0.0176142	0.000892962	up	1.88824	1.88824	0.91704	ASGR1	Bos taurus asialoglycoprotein receptor 1 (ASGR1), mRNA [NM_001037590]	TATCAAGATCTTCAGCATCTGGACAACGAGGAGAATGACCATCAGCACAGAAAAAGGCCA///GGCGAGGAGATTAAAACCCATGCTGCTTTCTATGGTTTGCAGGTTATTATTGTCAACTGG
A_73_P253106,A_73_111942|510538	0.0154489	0.000143213	up	1.88729	1.88729	0.916313	ASF1B	Bos taurus anti-silencing function 1B histone chaperone (ASF1B), mRNA [NM_001075453]	AATTCTTTCTGTCTTGTGTCCTTTCTCTCTTCTACACATACTATATACTCCACCTGCGGG///ATTGCAGTTTGTGTATTAAAGGGTTTTTATATTAAATATTTGGTTGGTCTGAAAATAAAA
A_73_P032046|616748	0.0156257	0.000287757	up	1.88727	1.88727	0.916301	TRAPPC2	Bos taurus trafficking protein particle complex 2 (TRAPPC2), mRNA [NM_001034796]	ACTACAGTGGGGTATACTCAGGAATGTGTACATTGTAAGTAATGATTAAATAGCATGGTA
A_73_117804|100295800	0.0212301	0.00196092	up	1.88698	1.88698	0.916078	COX17	Bos taurus COX17 cytochrome c oxidase assembly homolog (S. cerevisiae) (COX17), mRNA [NM_001207032]	TGCTCTGGGAGTGAATAGTTCCTGAAAAATGAAGAAGATTCAGTAACTTTGGGAGTTCCT
A_73_P051201,A_73_P210172|538628	0.0248639	0.00315033	up	1.88694	1.88694	0.916052	RUNX1T1	Bos taurus RUNX1 translocation partner 1 (RUNX1T1), mRNA [NM_001099385]	GAGACACCAGAAATATATAGCTGACCAGAGTCCTGTGTGAAAGTCCTTTAAAAGAAAAAA///AGAGCACTGAGTTTAGTAATAGGTGACTTCCGGAAAAAGGGGAACTTTGAATATTGTCAA
A_73_P094971,A_73_P336301,A_73_P335396,A_73_P388931,A_73_P316741,A_73_P288296,A_73_P445116,A_73_114120,A_73_P129491|281294	0.025675	0.00344652	up	1.88663	1.88663	0.915813	MAP2	Bos taurus microtubule associated protein 2 (MAP2), mRNA [NM_001205807]	ACCCCCAAAATTGATAGATGAAGAAACAAATATAATTCAACCTTCCACCGAACACACTTA///ATTGCCATCAAATTGTCTGTGGAAATACCCTGTGCACCCGTTGTTTCAGAGGCTGATGTA///ATAAAGCACGAAGAGATTTGGCCACCGATCTTTCATTAATTGAAGTCAAGCTGGCAGCTG///CTATGAGGATTACAAAGATGAAACCACCATTGATGACTCCATCATGGATGCTGACAGCCT///GCAAATGTATTTGTTGCTGTATAGTGATTGTTTTGCAAAATAAAATTGCTTGTCACCCGG///CTTGAAGAAAAACCAACCATTTCTGACAAAGAAGCCATGCCAAAAGAGAGTGAACCCCCA///GGTCCAGTTATACATAAAAGG…
A_73_109455|539734	0.0190141	0.00122403	up	1.88656	1.88656	0.915755	SGSM2	PREDICTED: Bos taurus small G protein signaling modulator 2 (SGSM2), transcript variant X1, mRNA [XM_010815874]	TGTTTTTTGGCTCAGAAACTATACTCTTCAGTGTAACAGACCAATAAACACAGCATTTGG
A_73_P303866,A_73_105515,A_73_104740|511224	0.0325432	0.00589421	up	1.88613	1.88613	0.915431	NFATC1	Bos taurus nuclear factor of activated T-cells, cytoplasmic, calcineurin-dependent 1 (NFATC1), mRNA [NM_001166615]	AGGAGGACCAGGAGTTCGACTTTGACTTCCTCTTCGAGTTTAACCAGAGCGACGAGGGCG///AACTTCTACGTCTGCAACGGGAAGAGGAAGCGGAGCCAGTACCAGCACTTCACCTACCTG///GAGCTGCGCCCTTCAGGCACCCTGGATTTTTCAGTGGAAGTGCCTTATTTCAGCCGACCA
A_73_113873,A_73_P256521|505369	0.0222416	0.00221293	up	1.8859	1.8859	0.915255	MAP3K13	Bos taurus mitogen-activated protein kinase kinase kinase 13 (MAP3K13), mRNA [NM_001101853]	AGGACCAATAAACACTACAGCTCTGCTACCTGGTAATGAAAGAACACCCACCCTGAAGAT///AGTGTTCTGATGCCACAGTCAGGACCAATAAACACTACAGCTCTGCTACCTGGTAATGAA
A_73_111254|509050	0.016629	0.000663799	up	1.88585	1.88585	0.915215	C21H15orf40	Bos taurus chromosome 21 open reading frame, human C15orf40 (C21H15orf40), mRNA [NM_001075386]	TGAAAAAGTGGTGAAGCTTTTGGCCTCCACACCTCCGGAAGAGATCTTGGAGAAATTGAA
A_73_P512898,A_73_P248501,A_73_P111826,A_73_P054632|768254	0.0198755	0.00149321	up	1.8835	1.8835	0.913419	ZNF280BY	Bos taurus zinc finger protein 280B (ZNF280B), mRNA [NM_001078120]	GGATAAAAGTCCTCATGTATCAAAGCGACTTTCCACTTCTGAAACAAATAGCACAAGTCC///ATCATAAGCCTGGAGACATGCCCTATGCATGCCAGGTTTGCAGTTACAGATCATCATTCT///CCTATGTATGCCAGGTTTGCAGTTACAGATCATCATTCTTTGCAGATGTGGATGCACATT///TGTGAACGCATCTGATTCTGAACCATCACTCCCCAAATCTAAAAGTAGGAGGTCAAAAAA
A_73_101993	0.02025	0.00166031	up	1.88264	1.88264	0.912755		LB03015.CR_J11 GC_BGC-30 Bos taurus cDNA clone IMAGE:8137837, mRNA sequence [DV929094]	AAGGGCCATTTAAAGACCCAGTATGACTGTTTCTATAATGAGAAATTTAGAAGACTGATC
A_73_115753,A_73_P116021|613679	0.0217713	0.00210649	up	1.8824	1.8824	0.912571	AGPS	Bos taurus alkylglycerone phosphate synthase (AGPS), mRNA [NM_001206719]	TGATGTCGGCTTTGGGATGCTGAAGTCTGTCAAGGAATATGTGGACCCCAATAACATCTT///TGGGTATCTACTCGAGCGTCAGGCATGAAGAAGAATATCTATGGCAATATTGAGGACTTG
A_73_103377	0.0491321	0.0129756	up	1.88225	1.88225	0.912461			TAGGTCCTTACCATGAAACCATATTTTGTTAATAGTTGATCAAGAGAGTTTTGTGAGAGC
A_73_105774	0.0307505	0.00516799	up	1.88188	1.88188	0.912174		HW_Fat_67_050831_B03 Bos taurus CF-24-HW fat cDNA library Bos taurus cDNA, mRNA sequence [DV776802]	GACTGCTAGTGGACTCGGTATTTGTGTGTGTGTGTGTTTTCACTTAAAATGGCTGTCTCA
A_73_P443456,A_73_P282156,A_73_P344866,A_73_117543,A_73_P300891|514787	0.0223165	0.00224681	up	1.88163	1.88163	0.91198	STK38L	Bos taurus serine/threonine kinase 38 like (STK38L), mRNA [NM_001101092]	AGGATTTCGAAGACTACTACAGGAATTGGTTGGCAGTGCCAGCTGGCTTTTTTCTTTTTT///GGGTAAGATACAAGGAAATTGCAACATACTCTGGTTCTACTATGGTAACTATTCTAGTAT///ATGGTGAGTTGAATTGAAGAAATGACCATGAAGGCTGCTTGTAGAACTACTAGTGTATTT///TATACTTCCCATATTTCAGGTGAACCATTTAAGTGACAAAACCCTATCTAATCAACAGAG///GGGTTTCATCCATCGGGATATTAAACCAGACAACCTTTTGTTAGATGCCAAGGGTCATGT
A_73_117941	0.0271706	0.00396602	up	1.88109	1.88109	0.91157		Rep: Inactive ubiquitin carboxyl-terminal hydrolase 53 (Inactive ubiquitin- specific peptidase 53). - Canis familiaris, partial (6%) [TC467054]	TTCTTTGACCATTTATGTGAGGTTTGCTATTGCATTCCTGTTATGTGGCTGTAAATTATG
A_73_P400976,A_73_118278|515646	0.0155841	0.000174438	up	1.88085	1.88085	0.911385	CLIC1	Bos taurus chloride intracellular channel 1 (CLIC1), mRNA [NM_001015608]	AGAGATTTTTATTGTGGGGTGGGTTGGACAATGTATTTCAGTAATAAAATACGGAATGCC///CACCTGTCCAGATGATGAGGAAATCGAGCTGGCCTATGAGCAAGTGGCCAAGGCCCTCAA
A_73_P503513	0.0300668	0.00492824	up	1.88064	1.88064	0.911222		PREDICTED: Bos taurus ankyrin repeat domain 11 (ANKRD11), mRNA [XM_612059]	TGGTTCCACTTTTGATCGACTCAAGAGAATAAAACTAAGGCGTCTACCCCTCAGCAACAG
A_73_P140571,A_73_P058191|538487	0.0201342	0.00162027	up	1.87909	1.87909	0.910034	C25H16orf72	chromosome 16 open reading frame 72 [Source:HGNC Symbol;Acc:HGNC:30103] [ENSBTAT00000018406]	TGATGTCGATTTGAACACTTTCATATCAGAAGAAATGGCACTCCACTTGGACAATGGTGG///GGTTGCCATAAAAAGAAAGTTCTAGGTATTTATAGTAGATGCCTCTTGTAACAATGGCTT
A_73_114020	0.0189487	0.00119033	up	1.87865	1.87865	0.909694		Rep: Flavin-dependent monoxygenase - Chlamydomonas reinhardtii, partial (7%) [TC477317]	TGGCACAGAGAATCTGCTGGAATAGATTTCTGTGGGGCGAGGAGAGCTCAATAAAATGTT
A_73_P037661|529760	0.0225681	0.00235521	up	1.87777	1.87777	0.909024	ADORA2B	Bos taurus adenosine A2b receptor (ADORA2B), mRNA [NM_001075925]	GACCCCAAAGTGAAAATTTTACTAAGGTGGGTTATGTAACTGTGTTTCTGTATGAGGTGA
A_73_103566,A_73_P262611|511858	0.027701	0.00415507	up	1.87764	1.87764	0.908919	NT5C3A	Bos taurus 5'-nucleotidase, cytosolic IIIA (NT5C3A), mRNA [NM_001037597]	TTTGTCATAGTGCCTACTTATTTCAGATTTATACACTATAAGAATAAAAAAGATTTTTAC///GTATTCCTGTGTTCATATTTTCGGCTGGTATCGGTGATGTGCTAGAGGAAGTTATCCGTC
A_73_P064811,A_73_P314276,A_73_103110,A_73_P383426|513059	0.0155841	0.000182275	up	1.87739	1.87739	0.90873	ATAD5	Bos taurus ATPase family, AAA domain containing 5 (ATAD5), mRNA [NM_001206489]	GGAATTCATCTTAACATTTCAAAAGAGACTATGAACACTTTGGCAGCTGACTTCCCTTAA///TGAAGAAGTAAGAAATCTTTTGTTGGAGGAAATTAGGTGGTCAAATCCCAGATTTCCTTT///GCTGACTTCCCTTAATATTCTACATTAACGATGCCTTCTACGGAGTCTCATGTGGCTCTC///AGGATACAGTCAGAAGTGGTTCTGTGAGTGACCCTGAAACCTATGAAATTTCCCAGCAGA
A_73_P093246|522059	0.0387047	0.00838243	up	1.87733	1.87733	0.908681	RAVER2	ribonucleoprotein, PTB binding 2 [Source:HGNC Symbol;Acc:HGNC:25577] [ENSBTAT00000043383]	GAATCACAACACACATTGGAGAAGTGCATTGCTTATTCTCAGCCTTTTGGTGATTATGCA
A_73_P446736,A_73_114234,A_73_P354131,A_73_P072471|614583	0.0297453	0.00483268	up	1.87636	1.87636	0.907933	SERTAD4	Bos taurus SERTA domain containing 4 (SERTAD4), mRNA [NM_001193037]	ATCCTATAACAACATCCAAGATCACATACTTTAAGAGGAAGTATGTGGAAGAAGAGGATT///TCGTCATTTGGACAATGTCCACAAGGACCAATTTTTAAAACCTGTTCTTGTGTTATGGCT///CAAGGACCAATTTTTAAAACCTGTTCTTGTGTTATGGCTGAATAGTCTAGTGATGTTTTG///AGGAAAAAGGAGCCTTCACCGAGTAACAAACTGTGCTGCAGCAAAGGCAGTAAAATATGA
A_73_P078771	0.0265637	0.00376072	up	1.87596	1.87596	0.90763		PREDICTED: Bos taurus protein WWC3-like (LOC523454), miscRNA [XR_083529]	CACCACCGAAATATGTAACCTTCTGTTGTGGGAATAAGTTATAATCAGTATTCATCTCTA
A_73_118302	0.0295802	0.00474396	up	1.8745	1.8745	0.906502			TCTTCCCGTTTGTGAATTGTTTGCACTTGTGCCTGTTTTAAATTAAACTGAGTGGCCCAA
A_73_P185402	0.0249949	0.00319736	up	1.87426	1.87426	0.906323		AV665484 Bos taurus brain fetus Bos taurus cDNA clone E1BR048G11 5', mRNA sequence [AV665484]	ACCCCCACCAAGATTTTTGCAGAAGAGAAATGGCTTTTGTACCAGGTCATTCTTTCGACG
A_73_102879|505907	0.0206128	0.00176074	up	1.87275	1.87275	0.905161	HSPA13	Bos taurus heat shock protein family A (Hsp70) member 13 (HSPA13), mRNA [NM_001038505]	AGTGAACTGCCAAAGGACAAATTTTCCCAAGCAAATGACCCCCATGTGGACAGCATGTTT
A_73_P266506,A_73_P111481,A_73_104309|404110	0.0188405	0.00116346	up	1.87266	1.87266	0.905086	ZFAND5	Bos taurus zinc finger AN1-type containing 5 (ZFAND5), mRNA [NM_001101045]	AAGCTCCTGAGTTGCCCAAACCAAAGAAGAACAGGTGTTTCATGTGCAGAAAGAAAGTTG///CTGCAGCAAAAATCAGAAAAGAGAATCCAGTTGTTGTGGCTGAAAAAATTCAGAGAATAT///GTACACGAGGCACTACTTCTGATTTATTGCAGTGTTCAGTCTTAGTTTTTACTTTTATTC
A_73_P450301,A_73_P295931,A_73_117146,A_73_P456961,A_73_P115841,A_73_P194317,A_73_P092716|532952	0.0293342	0.00466543	up	1.87203	1.87203	0.904607	MAGI3	Bos taurus membrane associated guanylate kinase, WW and PDZ domain containing 3 (MAGI3), mRNA [NM_001192746]	ACAGTCATGGGCATGGTGATAAGAAAAATCTCTTGAAAGCAGAAAACGGGATCACACCAA///TTATCCTTCTCACTCAGCTATTTCCACAGTAATGAAAAAAGTAGGCTTGGCTCGGAAGTT///TTGGATCCTCGTCTTTGTAAGAAAGCCAAAGCCCCTGAAGACTGTGAAGATGGAGAACTT///AAGAACATGCAGGAAAGATTCCCAGTCCTCTGAAAAATGACCCCAAAAGAAGACCCAGAG///GGAAATAAAGTTCTTCTTCTGTTGAGGCCAGGAACTGGCTTGATACCTGACCATGGTTTG///TCATCATGGTCTGAGTCCTCAGATTTTTATCCTTGTGAGTAACAAACATTCAAAGTCCTA///CCTGACGAAAGAATGGCTTTA…
A_73_P101511,A_73_P094146,A_73_117001,A_73_P101631|281875	0.0212694	0.00197308	up	1.87117	1.87117	0.903944	ITGAV	Bos taurus integrin subunit alpha V (ITGAV), mRNA [NM_174367]	ACGCTACATCCTGATCCATTAGAAGTTCCAACTTCAGTTTAGATTTTAATTTCCTTCCTG///AAGCCCGGTTGTATCTTACAAAGTTGACCTTGCTGTTTTAGCTGCTGTTGAGATAAGAGG///TTTTTTAAGCGTGTACGGCCACCTCAAGAAGAACAAGAAAGGGAACAGCTTCAGCCTCAT///CGAGGACTTTGGGAATGGTTTATATTTATGATGGGAAAAACATGTCCTCCTTACACAATT
A_73_106789,A_73_P394606,A_73_P036556,A_73_P457536|509977	0.016629	0.000671653	up	1.87082	1.87082	0.90367	ARL6IP5	Bos taurus ADP ribosylation factor like GTPase 6 interacting protein 5 (ARL6IP5), mRNA [NM_001014891]	ATGTTTTCATTAGAAGGCATTTGTTGCAAACTAATACCATCTTCTTTAAGGGGGTTACAG///AGGAAACCATCACCAAGTTTTCTGACTATATCAGTAAAATGAAGGAGTAAACGGAGCTGC///AGTGTACAGCAACAGTATGGTTATTTTGTAGGAAACAGTTTGTAAAGTATCAAGGCAATG///CTTCTTTAAGGGGGTTACAGCTCTGTAGCCTGTATTATTCTTGACAAGCTTGTTAAAAAA
A_73_104593,A_73_P328146|538691	0.0421696	0.00983722	up	1.87048	1.87048	0.903412	HS3ST1	Bos taurus heparan sulfate-glucosamine 3-sulfotransferase 1 (HS3ST1), mRNA [NM_001076122]	GGCATTTTGTATTGTTTTTCATGGTTGTTAACATGTGTAATATGTCTCTATATGAAGGAA///AGGCGCGGCTCAGTAATCAGAAGCCTGCAATACCCATGTGTCACTGATCTGGAGACGTCC
A_73_P098576,A_73_P102266,A_73_P500023,A_73_117861|281585	0.0310347	0.00528129	up	1.8697	1.8697	0.902809	ABCB1	PREDICTED: Bos taurus multidrug resistance protein 1-like (LOC785554), miscRNA [XR_083279]	TTATCCATCTCGAAACGAAGTTAAGATCTTGAAGGGCCTCAACTTGAAGGTAGGGAGTGG///TATCATGAAACTGCCTAATAAATTTGACACCCTGGTTGGAGAGAGAGGAGCCCAGCTAAG///CTGCCCTGCTAAAAGATTACAGAAGTAGCAAAAGTACTGAATGTTTGCATATAGTGCCTA///CATCAATATCATTGAAAAAATTCCTCTGATCGACAGCTACAGCACAGAAGGCCTAAAGCC
A_73_106807	0.0253855	0.00333479	up	1.86943	1.86943	0.902597		Rep: Ankycorbin - Homo sapiens (Human), partial (7%) [TC434001]	ACTGAAGTTACATGCTGTAGTTTAGCATTTTGCCTTGTAATTTACAGAAAAGTATTGCGG
A_73_P344136,A_73_P038726|511631	0.0194275	0.00133452	up	1.86928	1.86928	0.902484	UBE2Q2	Bos taurus ubiquitin conjugating enzyme E2 Q2 (UBE2Q2), mRNA [NM_001075530]	GTGGATCCTGATAGTCCTTTGCACAGTGATCTTCAGATTTTAAAAGAAAAAGAAGGCATA///AATTCCATTGTACAGATACATGAGAAAAATGGCTGGTACACCCCTCCAAAGGAAGATGGC
A_73_100389|534262	0.0382111	0.00815632	up	1.86888	1.86888	0.902174	USP38	Bos taurus ubiquitin specific peptidase 38 (USP38), mRNA [NM_001102167]	TTCTGTATGTGCCTTGCAGTACTGTAATTCAAAAATAAGAATCTTTGGCTGCGGAAAAGG
A_73_P496333,A_73_P072176|512915	0.0366323	0.00743462	up	1.86809	1.86809	0.901566	ZBTB17	zinc finger and BTB domain containing 17 [Source:HGNC Symbol;Acc:HGNC:12936] [ENSBTAT00000044658]	TCCACACGGCCCAGGCACTGGTCATGTTCCAGACAGATGCGGACTTCTACCAGCAATATG///ATCCACACGGCCCAGGCACTGGTCATGTTCCAGACAGATGCGGACTTCTACCAGCAGTAT
A_73_P154543,A_73_119736|280695	0.0201042	0.00157119	up	1.86801	1.86801	0.901505	MB	Bos taurus myoglobin (MB), mRNA [NM_173881]	AATCCCAAGTAGTTATAGGGTTTGCTTCTGAGTGTGTGCTTTGTTTAGGAGAGGTGGGTG///CACACCCAGCCCTAGGGAGGCATGGAGGCATGGTGTCTGCAACATAAATGTCCCTTCTCA
A_73_118601,A_73_P368841|767928	0.0161901	0.000484236	up	1.86798	1.86798	0.901482	RBPJ	Bos taurus recombination signal binding protein for immunoglobulin kappa J region (RBPJ), mRNA [NM_001077001]	CAGTTGTGTCCTAACTACCGTCTTTTTGCTAGGACTTACACTGACTTGAGTGCGGCAAAT///CACAGCCAAAACATTATATATATCTGATTCAGACAAGAGAAAGCACTTCATGCTGTCTGT
A_73_P389801	0.0306094	0.00510468	up	1.86741	1.86741	0.901042		Rep: LOC201725 protein - Homo sapiens (Human), complete [TC479855]	CTACATAATGCTCTGTTATGTATGTTTCAACTGTCTTGAAGTCTATGGTGTATCCTTGTA
A_73_P432491,A_73_P041626|532877	0.0403388	0.00910163	up	1.86608	1.86608	0.900008	RNF38	Bos taurus ring finger protein 38 (RNF38), mRNA [NM_001034581]	GCGTCAGAGAGGAAGAAGGGATCGTCAGTCTCGACTTAATTCCATTAGTCAAGATGAAAA///GTCAATGGACCTTTCTTTGCACTGTGTGACTTAATCAACTATAAAAGCTTACAATTAGTC
A_73_P290431,A_73_P195677,A_73_102981|790875	0.0161901	0.000458064	up	1.86584	1.86584	0.899829	GSK3B	Bos taurus glycogen synthase kinase 3 beta (GSK3B), mRNA [NM_001101310]	ACAACCACCAGTTTACTTGAGTGTCACTCAGCAACACTGGTCACGATTGGAAAGAAAATT///AGATCACTGTAACATAGTCCGATTGCGTTATTTCTTCTACTCAAGTGGTGAAAAGAAAGA///TTCCCTCAAATTAAGGCACATCCTTGGACTAAGGATTCGTCAGGAACAGGACATTTCACC
A_73_117252	0.0253202	0.00331604	up	1.86459	1.86459	0.898859			TAAACCTGGCACTGTACTCAATAAACATTTCTGCAGCCTTTCATCTCTAAAAATAAAAGC
A_73_101687,A_73_101269|539767	0.015973	0.000341337	up	1.8634	1.8634	0.897941	RASSF5	Bos taurus Ras association (RalGDS/AF-6) domain family member 5 (RASSF5), mRNA [NM_001113760]	CAACAAGTTCAGGCAGAAACTGGAGGAGGCCTTGAGAAAAGCCCAGGGCAAACCTGCCTA///TCTTGCGCAGTGTGTGCTCTGGGGCTGTTTTCTTCTGAAATGTCTGTCTTATATGGGTTT
A_73_120539	0.0349333	0.00677621	up	1.86295	1.86295	0.897588		PREDICTED: Bos taurus La ribonucleoprotein domain family, member 1 (LARP1), mRNA [XM_582017]	TTTCAGGCTGAAGTGATTCATTCATTATTCTAGTCCTGCTTTAGTCGTTTGTAATTTGTG
A_73_P097471,A_73_P097481,A_73_P099606,A_73_P168322,A_73_118531,A_73_P050296|281173	0.0249483	0.0031781	up	1.86232	1.86232	0.897098	FTH1	Bos taurus ferritin heavy chain 1 (FTH1), mRNA [NM_174062]	ATACTTTCTTCACCAATCTCATGAGGAGAGGGAACATGCTGAGAGACTGATGAAGCTGCA///TCATTACCTGAATGAGCAGGTGGAAGCCATCAAAGAATTGGGTGACCACATAACCAACCT///TTGAGACTCATTACCTGAATGAGCAGGTGGAAGCCATCCAAAGAATTGGGTGACCACATA///CTACTTAAGTTCTTTCTTTAGTACCATTCCTTCAAATAAAGTAATTTGGTGCCCAAAAAA///GTGACTTCCCTGGTCACCAAGGCAGTGCATGCATATTTGGGTTACCTTCATCTTTTCTAT///GCAGTGCATGCATATTTGGGTTACCTTCATCTTTTCTATAAGTTGTAACAAAACATCTAC
A_73_P033126|532261	0.0327881	0.00597202	up	1.85905	1.85905	0.894563	SNAP29	Bos taurus synaptosome associated protein 29 (SNAP29), mRNA [NM_001075959]	GCAGCGAAGAGATTTCAAAGGTCTTCTTTTAAACTGACAAACTTCACTTACTACTTCAAA
A_73_109845	0.016629	0.000662177	up	1.85893	1.85893	0.89447		LB03422.CR_J12 GC_BGC-34 Bos taurus cDNA clone IMAGE:8661806 5', mRNA sequence [EV666940]	GAGGTTATGTTAGAGGAAATGGTGTATATGATCCCTATGAATGATACTTCGGCTTTTGTT
A_73_110580|616377	0.0323543	0.00581054	up	1.85864	1.85864	0.894248	CDA	Bos taurus cytidine deaminase (CDA), mRNA [NM_001193110]	AGTTTGGCACCGACTGGGCTGTCTACATGACCAAGCTGGACGGCACGTATGTTGTCAGGA
A_73_116904|506627	0.0230447	0.00249034	up	1.85819	1.85819	0.8939	DKK3	Bos taurus dickkopf WNT signaling pathway inhibitor 3 (DKK3), mRNA [NM_001100306]	TGATATTTTCAGGTGTCATGGACTGTTTCCATCATGTATGCATCCAGAGTTATTAAATGT
A_73_P136136	0.0212694	0.00196879	up	1.85795	1.85795	0.893712		Rep: Transmembrane protein 63C - Homo sapiens (Human), partial (8%) [TC480099]	TCTCTTGTCTGTCCCTGCAAGGGTAGCGGGGCTCATTAAATGGGACCTGTGTGCATTCTG
A_73_114387,A_73_P277251|538949	0.0469184	0.0119757	up	1.85775	1.85775	0.893556	ESCO2	Bos taurus establishment of sister chromatid cohesion N-acetyltransferase 2 (ESCO2), mRNA [NM_001101182]	TAGCTTCACTCTGGCAGTAAGACTCTAGGGAAGTAGTGTCCAGGTCATAACTCTGTAGAA///AGGTTTGAGACAAGGCAAGCGCCAAAGTGTGTGTTAGTAGAAAAAGAACTGAACGTTGAG
A_73_P090136,A_73_P090141|506740	0.0188707	0.00117901	up	1.85652	1.85652	0.892603	ESPL1	Bos taurus extra spindle pole bodies like 1, separase (ESPL1), mRNA [NM_001045949]	CCTCCAAACTTAGGTTTGGCCCTGAAGATAAATATTTTAAGTAATTTTCCGGTGTTTTAC///CTCAAATACCTTATTGGGGCTGCACCTGTAGCCTATGGCTTGCCTGTCTCCCTGCGGTGA
A_73_P034416,A_73_P256576|504320	0.0193149	0.00129712	up	1.85585	1.85585	0.892082	DAP3	Bos taurus death associated protein 3 (DAP3), mRNA [NM_001113294]	ACGGTCACAAAGTGCATGGAAGACAATGGATGTTTCTTTAATGGACCAGTCAGATGGGAG///ATGGAGTCAATGCTCTCTGGGGAAGGACCACACTGGAAAGAAAAGAAAAAAGCCCGATTA
A_73_P037501,A_73_P208327|282151	0.0454338	0.0113122	up	1.85564	1.85564	0.891915	BCL2A1	Bos taurus BCL2 related protein A1 (BCL2A1), mRNA [NM_001037100]	CTACACAGAGAACTTTGATGATGTAACTTAACATTCTGAAGTTATGGGAATTTTCTCCCC///CATTGTTAACTGGGGCAGGATTGTAACCATATTCGCCTTTGAAGGTATTCTTACCAAGAA
A_73_120018|505302	0.021548	0.00204487	up	1.85424	1.85424	0.890829	DUSP12	dual specificity phosphatase 12 [Source:HGNC Symbol;Acc:HGNC:3067] [ENSBTAT00000028997]	TCCGTGGCAGATTGTGTAGTTTTTAGGCTGTTAACATTTCATTTGCAATGTGAGAAGATA
A_73_P283996,A_73_P049506,A_73_P078711|616331	0.0299039	0.00487135	up	1.85417	1.85417	0.890773	AP1S2	Bos taurus adaptor related protein complex 1 sigma 2 subunit (AP1S2), mRNA [NM_001040591]	GTTCAGGAAACATCCAAGAAGAATGTCCTTAAAGCAATTGAGCAGGCTGATCTACTGCAG///AGGCCACGTGAGCACTATCTTACCACATTGCCAATTAGTTGTAATAAATGTTCAACGTAC///CAGGAGGATGCAAAAGAAGCTGAAACCCCACGTAGTGTTCTTGAAGAAATTGGACTGACA
A_73_108497	0.0161901	0.000505808	up	1.85316	1.85316	0.889987		PREDICTED: Bos taurus protein phosphatase inhibitor 2-like (LOC508096), mRNA [XM_584823]	TGGGAGCCAACTTTCCCTGCCCTCACCACCCTCGGTCAATCGGGGTAGACAATAAAGAGA
A_73_P508008	0.0493934	0.0130935	up	1.85143	1.85143	0.888642		PREDICTED: Bos taurus teashirt zinc finger homeobox 3 (TSHZ3), mRNA [XM_015467408]	CCTGTTTTGTTGTTGACATGAACCACATTATGTGACTCTTCATATAACCCTCTTTTCTAC
A_73_111391|281249	0.0457435	0.0114468	up	1.85108	1.85108	0.888366	IL18	Bos taurus interleukin 18 (IL18), mRNA [NM_174091]	TCAAAGAAGTGTTCCAGGACATGATGATAAGATACAATTTGAGTCTTCATTGTACAAAGG
A_73_P442861,A_73_P138346,A_73_P071181|540479	0.0254562	0.00335954	up	1.84951	1.84951	0.887141	NF2	neurofibromin 2 [Source:HGNC Symbol;Acc:HGNC:7773] [ENSBTAT00000017489]///PREDICTED: Bos taurus neurofibromin 2 (merlin) (NF2), transcript variant X1, mRNA [XM_003587173]	TATTGGGAATCACGACCTGTTTATGAGGAGAAGGAAGGCCGATTCTTTGGAAGTCCAACA///TAAGAAGTATTTGTCTCTCCTTGTCTGATGTGGGGTCCTATGCTTCCTTCGTCCAAAGCA///TTTCGACTTCAAGGACACCGACATGAAGCGGCTTTCCATGGAGATAGAGAAAGAGAAAGT
A_73_120681|507032	0.0374943	0.00787492	up	1.84845	1.84845	0.886314	PDCD2L	Bos taurus programmed cell death 2-like (PDCD2L), mRNA [NM_001192129]	TCAAAATGATCAGGCGCCCATGGAAGAGTTTTGTATTATCCAAGAGGACCCAGATGAATT
A_73_121102	0.0166838	0.000696212	up	1.84781	1.84781	0.885814		Rep: Retinitis pigmentosa 9 protein - Homo sapiens (Human), partial (39%) [TC418932]	GTTCTGCCGTAGGTTCCACCTCCAGGGTGGAGCTACTTGTGTAGAGCTCAGGCCTGATTT
A_73_108945|524925	0.0364278	0.00737926	up	1.8475	1.8475	0.885572	TTK	Bos taurus TTK protein kinase (TTK), mRNA [NM_001205913]	TATGTTCTGGGCCAACTTGTTGGCCTGAATTCTCCTAATTCCATTTTGAAAGCTGCTAAA
A_73_P082421,A_73_100946|521931	0.0191802	0.00125589	up	1.84606	1.84606	0.884448	KCNK12	Bos taurus potassium two pore domain channel subfamily K member 12 (KCNK12), mRNA [NM_001205890]	AACGTCATCTCCATCCTCATCAAGCAGGTGCTCAACTGGATGCTGCGCAAGCTGAGCTGC///TGGCGTGCAGCCGGGCGGCGTTTGCTCTCCTCTCAGACGCTGGCGCTTTCTTAACCTTTA
A_73_P371776,A_73_P091606|526771	0.0216532	0.00207216	up	1.8459	1.8459	0.884326	TEAD4	TEA domain transcription factor 4 [Source:HGNC Symbol;Acc:HGNC:11717] [ENSBTAT00000036296]	AAGATGTATGGTCGGAATGAGCTGATCGCCCGCTACATCAAGCTCCGGACAGGGAAGACC///TACATGATCAACTTCATCCACAAGCTGAAGCACCTGCCTGAGAAGTACATGATGAACAGC
A_73_P203037,A_73_P044411|534182	0.0291532	0.00460781	up	1.84518	1.84518	0.883764	FKBP9	Bos taurus FK506 binding protein 9 (FKBP9), mRNA [NM_001046372]	ATTTTGTAAGATACCACTACAACGGGACATTCCTGGACGGGACACTGTTTGATTCCAGTC///CATCTTGGAGGGAACAGAGGAAAATGTGTCTGGGATATCTACATAAAGAGGATTAAAAAT
A_73_118683|513844	0.02081	0.00182985	up	1.84517	1.84517	0.883754	SPON2	Bos taurus spondin 2 (SPON2), mRNA [NM_001046157]	CGAAATACCTCAGACCCAGGGACCCGGGCCCCCGGCCTCGTCAGGGTCCCGTCCCAGCTG
A_73_117497,A_73_P257126|515287	0.0238154	0.00281197	up	1.84399	1.84399	0.882831	CDCA2	Bos taurus cell division cycle associated 2 (CDCA2), mRNA [NM_001046194]	TTCTGTACCTCTACACTTGCCAATCCTAAAAGTACCACCCAGTCAAGAGGCTGCAAAAGA///CCTTCAGAGAACAAAGAGCGAAACCAAAGTAAGACGCAGCTTGAGGCTGCAGAAAAGTTT
A_73_103835|526525	0.0445361	0.0109129	up	1.84333	1.84333	0.882315	F2RL1	Bos taurus F2R like trypsin receptor 1 (F2RL1), mRNA [NM_001046283]	CCGGAGATGCTTCTGTTGTTTCTTAACCAAGTAGGTTTCACCACATACCATGTATATGCA
A_73_P035811|617257	0.0347763	0.00673481	up	1.84157	1.84157	0.880934	CCDC9	Bos taurus coiled-coil domain containing 9 (CCDC9), mRNA [NM_001098138]	TTGAAAATGCATGAAGCTGGCTGCTTGTGTGTGTGCTCGAGGGGTGCATGGAGGACCCTG
A_73_P046191,A_73_P278591,A_73_P490008|506626	0.018354	0.00105118	up	1.84141	1.84141	0.880811	RTN4IP1	Bos taurus reticulon 4 interacting protein 1 (RTN4IP1), mRNA [NM_001075275]	GGGGACATGCACGAGGAAAGACCGTCATTAACGTTGTTTAAATAAATATTCGGTTTGGTG///TTCCATTTTCTAAAGTTCCAGAAGCCTTCCTGAAGGTAGAAAGGGGACATGCACGAGGAA///TGGAAACAAGGCACTCTCTCAGAATTTGTTGTTGTCAGTGGGAATGAGGTCTCTCACAAG
A_73_104010,A_73_P381316|517007	0.014751	6.85104e-05	up	1.84079	1.84079	0.880323	CHTF18	Bos taurus chromosome transmission fidelity factor 18 (CHTF18), mRNA [NM_001192460]	TACCTAGGTGTTGCTTTCTCTCTCCTAGAAAGTGTACAAAAGCACCAGCGTTCTCGCAAA///GAGATGGAAGAGATGACACCTCCTGATTCCCCGACTCTGGACATCACTCCCCCACCAAGT
A_73_108292	0.0429457	0.0102218	up	1.84051	1.84051	0.880108		Rep: Predicted protein - Coprinopsis cinerea okayama7#130, partial (6%) [TC477176]	TATTGTGTGAACTGAGTTCTTCTGTATAAATTATTTGCACTCTCTTCTTGCATGACGAAC
A_73_109545	0.0161901	0.000490323	up	1.83994	1.83994	0.879657			GCACAGCTAGCCTATAAATCTCTACAATTCTGTGAATTTCAACACTTGTTGAAATAGCTG
A_73_P044251|504499	0.023143	0.00256527	up	1.83916	1.83916	0.879048	NDRG1	Bos taurus N-myc downstream regulated 1 (NDRG1), mRNA [NM_001035009]	GTTGAATCAGAACAAGAAGCTGTTATGTACAAGTCTTTCCAGAAGAGTTTCTTAATGAGA
A_73_P362936,A_73_P483443,A_73_101534,A_73_P276621|506294	0.0212301	0.0019597	up	1.83782	1.83782	0.877995	KIF22	Bos taurus kinesin family member 22 (KIF22), mRNA [NM_001101868]	AGAGATCTACCAGGAAAAGGTATTAAACCTCTTGGAACCTTCATCGGGAGACCTGGTGAT///AATGAGAGCCTGCAGCTTCCTGTCTTGGCACCTGTTAAATTGTCTCAGAAAGAACTGCTA///CCTTCAGCCAGGTTGAGGACCTGGAACGCGTGGAGGGTATATCAGGGAAACAGATGGAGT///TGGAAATTGAGAGGCTTAAGATGAAGCAAAAAGAACTAGAAGCCAAAGTGCTGGCCCAGG
A_73_P427656	0.030305	0.00500203	up	1.83768	1.83768	0.877889		dual specificity tyrosine phosphorylation regulated kinase 2 [Source:HGNC Symbol;Acc:HGNC:3093] [ENSBTAT00000009545]	AGTGCTCACGACACAACCAAATGGGCTTACCACGGTGGGCAAAACGGGGTTGACAGTGGT
A_73_P423381,A_73_P048721|519474	0.0322795	0.00578856	up	1.83762	1.83762	0.87784	TERF1	Bos taurus telomeric repeat binding factor 1 (TERF1), mRNA [NM_001076865]	AAGTGTTAGTGACAGACAGTCTGCGGTAACTGAATCCTCATGGGGTACAGTATCCTTATT///CACACCTTATTGGACAACTTTTGAGTTTTTACCAACGTGGTCTTTAGAGAATTTGTCAAA
A_73_P107746|100174924	0.0408684	0.00933621	up	1.83629	1.83629	0.876792	LOC100174924	Rep: Probable HIT family protein - Pseudomonas aeruginosa (strain PA7), partial (10%) [TC446956]	TCTGTTTGACCATGACACTGCTGTAGAATCATAACCTGTTAATCAGTGTATTACTTTCTA
A_73_P411126	0.0155841	0.000255308	up	1.83522	1.83522	0.875952			CAGTACCTTTTGTTTGATGTTGCTGACAAGACCTAAAGATAATCCCTTAAAAAATCTACC
A_73_P065141|100140050	0.0351532	0.00686559	up	1.83489	1.83489	0.875691	ITGAE	integrin subunit alpha E [Source:HGNC Symbol;Acc:HGNC:6147] [ENSBTAT00000020307]	CTGTGCATTGTGCAGAAAAGAAACCTGGGAAACATTTGGTTGTAAATAAAGGTAAACTAT
A_73_P069886,A_73_P315891|539449	0.0154489	0.000145057	up	1.83306	1.83306	0.874257	PLK2	Bos taurus polo like kinase 2 (PLK2), mRNA [NM_001192245]	TGATCTACAGCACGTTGAAGAAGATGGACAGGTGGTGGTACGAAAACAATTTCTCTGTGG///GACACTTGTGGCTGGAAAAGTGCATTCCTTGTTAATAAACTTTTTATTTATTACAGCCCA
A_73_103679	0.0238225	0.00281606	up	1.83284	1.83284	0.874082		Rep: PREDICTED: interferon regulatory factor 5 - Bos taurus, partial (70%) [TC448304]	TCCCATACGTTACAGTAATTGATTTGAATCACCCTATTTGAGAATACATGTGTGTGGTTA
A_73_117450,A_73_101712,A_73_P301026|767818	0.0238225	0.00281952	up	1.83224	1.83224	0.873606	PRC1	Bos taurus protein regulator of cytokinesis 1 (PRC1), mRNA [NM_001076543]	TGGTTCTTGGAAGCTTACAGGTGTGGATTTGGTCTGTTAGTCATGCGTATACATGTACTG///ACAAGAACTGAAAATTCTTCAAGAACAAGATCAAGAACTGTGTGAAATTCTTTGCATGCC///GTTATATTTCACCTTTGAGTAGGAAAATGACTGTGTCCATCCTTGGGGTATGGGACATGA
A_73_P160847	0.0212026	0.00194584	up	1.83209	1.83209	0.873493		LB0324.CR.1_L04 GC_BGC-32 Bos taurus cDNA clone IMAGE:8388438, mRNA sequence [EE253526]	TTAATGGGCATGAGTTTGAGCAAGCTCTGAAACACAGTAAAGACAGGGAAGTCTGGCATG
A_73_108231,A_73_P479808,A_73_P278771|615371	0.0155841	0.000201948	up	1.83182	1.83182	0.87328	NFIA	Bos taurus nuclear factor I A (NFIA), mRNA [NM_001038209]	AAGGACAGTGAACCCACTCGCGTTGCAGAATAATCCCGAAAATGGCAAACTACTACTACT///TGTGAAGGATGAGTTGCTAAGTGAAAAACCAGAGGTCAAACAGAAGTGGGCATCTCGACT///TTTAGAAAGTTCTTCATACTACAGCATGAGTCCAGGAGCAATGAGGAGGTCTTTACCCAG
A_73_P093186	0.0161901	0.000416772	up	1.83169	1.83169	0.873178			TCTCCTTCAGATGGAACCAGTAAACTATGAACGGGTGAAAGAGTACAGCCAGAAAGACGT
A_73_115747|512771	0.021548	0.00204433	up	1.83112	1.83112	0.872723	ASL	Bos taurus argininosuccinate lyase (ASL), mRNA [NM_001034428]	TGAGTCCTGACATGCTAGCCACTGACCTCGCCTACTACCTGGTCCGAAAAGGGATGCCAT
A_73_100877	0.0321489	0.00573817	up	1.83109	1.83109	0.8727		Rep: Predicted protein - Monosiga brevicollis MX1, partial (9%) [TC464863]	AATGTTTCAAGTGGGCCTGTTTAAGATAACTTGAAATACTTACCACAGTTCAAGTAGATG
A_73_P076916,A_73_P466498,A_73_P076911|525628	0.0403188	0.00909406	up	1.83071	1.83071	0.872406	DIAPH3	Bos taurus diaphanous related formin 3 (DIAPH3), mRNA [NM_001192614]	GTTTCTAAAAACGAACCCATTCCTGAAGTTGAAGCCCTGCTGGCAAGATTACGAGCTTTA///CAGGCTTCACATCAGAAATGAATTTATGCGTTGTGGATTGAAAGAGATATTGCCAAATTT///GACTGAAGACTGTTTCTGGGTAAAAGCAAATGAAAATAAGTATGAAAGTGTGGATTTGCT
A_73_104107	0.0481728	0.012539	up	1.82982	1.82982	0.871704		Rep: Neurotrophin receptor associated death domain - Bos taurus (Bovine), partial (47%) [TC480614]	CAGAAGCCTCCACCTGCTAGGACTCTCAGGCCTTAGGTTTTGAGACCATTTTCCTCATCT
A_73_P402006,A_73_P091721,A_73_113181,A_73_P493593|517259	0.027701	0.00415301	up	1.82787	1.82787	0.870166	MICALL1	Bos taurus MICAL-like 1 (MICALL1), mRNA [NM_001193066]	AAGATGACATGCTGGTGGACTGGTTCAAGCTCATCCACGAGAAGCACCTGCTGGTTCGGC///ATAAGATGTTGGAAGCCATGATCAAGAAGAAAGAGTTCCAGAAGGAGACTGAGCCTGAGG///TCACCCAAGTCAACTGTAGCCTGTGGGATGTGGGCCCAGTGGGGCCAGATCTTTGCATTT///AATCCTTTTAACCGGAAACCATCACCTACAGCATCACCAAGTGTAAAGAAGGCCACCAAG
A_73_P366161,A_73_P036166|539687	0.0331588	0.00609495	up	1.8275	1.8275	0.869868	PARD6B	Bos taurus par-6 family cell polarity regulator beta (PARD6B), mRNA [NM_001098104]	ATCAAGAAGAAGAATGTTCTAACCAATGTGTTGCGGCCCGACAACCACAGAAAAAAGCCG///AATTTGGCTAGTTGCAAGCATTATATACCTCTGAACAAGTGATCTGGGATAGGCATGAAA
A_73_107974	0.0155841	0.000268691	up	1.8274	1.8274	0.86979		PREDICTED: Bos taurus uncharacterized LOC101902705 (LOC101902705), transcript variant X1, ncRNA [XR_239116]	AGGTAAATCCTGCCCCTTGTTGAAATGTAGTTTCAGTAGATAGTTCTTGGCATTTTAAGG
A_73_118080|353245	0.0330448	0.00606026	up	1.82728	1.82728	0.869695	CEP57	Bos taurus centrosomal protein 57 (CEP57), mRNA [NM_181450]	GGACCACAAATAAGAAGGACTTCGCCAAACCGAGACCTGGAGAAAAAAGCAGGAAAAATC
A_73_107541	0.028195	0.00432466	up	1.82701	1.82701	0.869483		Rep: PREDICTED: BTB/POZ domain containing protein 3 - Pan troglodytes, partial (95%) [TC398407]	AGCTTGCTAATTCAAGACACTAGCCAGTTGTGCATCAGAGTGCTTGAATTCAGGAGCTTA
A_73_P406507,A_73_121127|767984	0.0161901	0.000495246	up	1.82646	1.82646	0.869052	PLIN3	Bos taurus perilipin 3 (PLIN3), mRNA [NM_001077046]	AGACTTGACCAAGTCCATGGTGACCAGCGGTGTCCACTCAGTTGTGGGCTCCCGTGTCGG///TCAGGCCTGCCCAGCGAGCCCTGGGTGCGGGAGGCTTCAGTGTTGCCTTAATAAATTTTA
A_73_P081371|539754	0.0188707	0.00117842	up	1.82629	1.82629	0.868916	UBE2J1	Bos taurus ubiquitin conjugating enzyme E2 J1 (UBE2J1), mRNA [NM_001206186]	TTACAGGATGATATACCTGCAACATTCCAGGGTGCTACAGCAAGTACATCGTATGGAACC
A_73_100990,A_73_P088256|540444	0.0250795	0.00324223	up	1.82528	1.82528	0.868114	HMGB2	Bos taurus high mobility group box 2 (HMGB2), mRNA [NM_001037616]	TTGTGTATGGTAGCACAGCAAACTCATAGAAATTAGCATCAATAGCAACTTTTGGGTTTT///CTAAGCTAAAGGAGAAATACGAAAAGGATATTGCTGCATACCGTGCCAAGGGCAAGAGTG
A_73_P185942	0.0366826	0.00745599	up	1.82513	1.82513	0.867998		Rep: K1324_HUMAN Isoform 2 of Q6UXG2 - Homo sapiens (Human) - Canis familiaris, partial (21%) [TC421605]	CTCTGTATTCCAAGAGTTTGTAGTTTGTTAGGGGATGGGTATCGCGTGTCACACTTTTTT
A_73_P424086,A_73_P420011,A_73_P365351,A_73_109154,A_73_P096576|615534	0.0158511	0.000315129	up	1.82513	1.82513	0.867996	FNDC3B	Bos taurus fibronectin type III domain containing 3B (FNDC3B), mRNA [NM_001206211]	GTGCAAGACATTCTTTCGGGAATAGAGAAGCCACAGGTTTCTAATATTCAGGCAAGAACA///CTTTGTACAAACTCCGAGCATGCTGCATAAGTACTGGTGGACACAGTCAGTGTTCTGAAA///GTCAGTCTTGTTCCTTGGCAACATCTGTAGTATTATCATTCTTCTGACATTTTCTTGTGT///CTAACCATGTTTTGTTGGCTACAGTAATTCAGTATTCCTGTCAAATTTGAAAAGTGCCCT///ATATCAGTGTTTTGGTGCACCTTTTTGAAATGCAAAACTAGGAAGAGGTTAAACTGGATT
A_73_113613,A_73_103448|616864	0.0244109	0.00299231	up	1.82467	1.82467	0.867639	SLC36A4	Bos taurus solute carrier family 36 member 4 (SLC36A4), mRNA [NM_001282523]	AGCTGTGGAGTTTTGTTTCTTGAAATGATGTTGTTTGTTTGAGTGAAAACTACGTATCAG///ACTAGCACTCCACACGGCCCCTCTTTAAATTTGAATTCCACATGCTTTACATCGGGTTTG
A_73_102788	0.0345592	0.00664406	up	1.82328	1.82328	0.86654		Rep: Peptidase S8 and S53, subtilisin, kexin, sedolisin precursor - Nitrosococcus oceani (strain ATCC 19707 / NCIMB 11848), partial (3%) [TC478773]	GAAATACGGTGTGTCTGTATTGTTGGAAATAGTGTTGAGGCAGCTGAGATGAAATGCAGT
A_73_112451,A_73_P331641,A_73_P250956|514472	0.0232866	0.00259429	up	1.82292	1.82292	0.866253	TRAP1	Bos taurus TNF receptor associated protein 1 (TRAP1), mRNA [NM_001038675]	TGCAGCCAGTCACTAGGGAGTAGGGACACACACAGGAACGACTGGGTGCGTGAATGACAA///ATTGTTGCCCGTTCCCTATACTCAGAAAAAGAGGTGTTCATTCGTGAGCTCATCTCCAAC///AAGAAGCTGATCTCTGTGGAAACAGACATTGTCGTCGACCACTACAAGGAGGAGAAGTTT
A_73_P166342,A_73_P065661|540586	0.0473349	0.0121567	up	1.8226	1.8226	0.865997	SOCS7	Bos taurus suppressor of cytokine signaling 7 (SOCS7), mRNA [NM_001206013]	AATTGGGAAGATGCAGAGATGAAGCTGAAAGGCAAGCCTGATGGTTCTTTTCTGGTACGA///TATACCTGTCTCTAAAGGAAGCGCAGCTCATTTCCAAACAGAAGCAAGAGGTGTTGGAAC
A_73_117673,A_73_P059716|536310	0.0310043	0.00527315	up	1.82231	1.82231	0.86577	ZDHHC2	zinc finger DHHC-type containing 2 [Source:HGNC Symbol;Acc:HGNC:18469] [ENSBTAT00000064000]///zinc finger DHHC-type containing 2 [Source:HGNC Symbol;Acc:HGNC:18469] [ENSBTAT00000060981]	ATCCCCTTTGGCTGGGTGTGCAGAACGTGAATTGAGTAGTTCTCTCAGCATTTGCTTTTA///ATCTAAAAATCCTGAAAACCATCAGTTTCCTGCAAAGCCACTGAGAGAGTCCCAGAGCCA
A_73_112591|522374	0.0264821	0.00373824	up	1.82199	1.82199	0.865515	PAQR9	Bos taurus progestin and adipoQ receptor family member 9 (PAQR9), mRNA [NM_001077951]	CACCGTGGGCTACATGCTGCTGCTGGTCGTCTGCCTGGGGCTGGTCATCAAGAAGTTCCT
A_73_118825	0.0214098	0.00201533	up	1.82188	1.82188	0.865431		Rep: PAP associated domain containing 4 - Bos taurus (Bovine), partial (54%) [TC460343]	CTGGCCTCTATTTCTTAATAAAGAGCAGTAGTAACATCATAATACGTTTTGTCTACCTTC
A_73_P349671,A_73_100608|506632	0.0264874	0.00374	up	1.81982	1.81982	0.863797	KLHL21	Bos taurus kelch like family member 21 (KLHL21), mRNA [NM_001076811]	TATAACCCCACCAAGAACGAATGGGGATAAAATCCCGTCAAATGAATCAGGTGCACGTTG///GTGGGGCAGGTTTGCATATTTATTTGTCTGTTCGTTAGGCTTCTGTGTCTGGGATCTTGT
A_73_P045741|508759	0.0375153	0.00788074	up	1.81872	1.81872	0.862926	DCUN1D5	Bos taurus defective in cullin neddylation 1 domain containing 5 (DCUN1D5), mRNA [NM_001046012]	CGTTGAGCCACACCTCTTCTGAGACTGAATATTGAAGTTTTTGTTTGAGTTATGTTTATA
[truncated: 2,926 more rows]
