# Supplementary material for: Transcriptomic Analysis of MDBK Cells Infected with Cytopathic and Non-Cytopathic Strains of Bovine Viral Diarrhea Virus (BVDV)
Source: Viruses. 2022 Jun 11;14(6):1276. doi: 10.3390/v14061276 (PMC9228727; doi:10.3390/v14061276)
Supplement: Supplementary file 1 [file viruses-14-01276-s001.zip › Table S4_Differentially expressed entities 24h p.i. with ncp.xlsx]

## Sheet: Arkusz1
Gene_ID	p (Corr) ( [1] )	p ( [1] )	Regulation	FC (abs)	FC	Log FC	GeneSymbol	Description	Sequence
A_73_118029	0.00570707	0.000230301	up	12.7592	12.7592	3.67347			GTGTTGCATTGCATTTATTTCAGTTGTATTTATGTACATGTATACCTGTCATGCTTCTGG
A_73_P081071	0.000590571	2.16475e-06	up	4.90856	4.90856	2.2953		Hw_loin_14_050628_F04 Bos taurus CF-24-HW loin cDNA library Bos taurus cDNA, mRNA sequence [DV795077]	CTGGGTGTGGGTGCTTGTATTTTTCTATTTCCAGTCACTTTAAGGTTGTTCACAAACTAA
A_73_P488083	0.0260822	0.00325555	up	3.98488	3.98488	1.99454			TTTTTTCTAGGTCTGACGTGCCTTTATTCCTTTCAGTTATGCTTGTGGATGGAGTGGGGG
A_73_P399596,A_73_P397591,A_73_P060851,A_73_P060831,A_73_110703,A_73_P154997|281474	0.0165002	0.00156371	up	3.87627	3.87627	1.95467	SAA3	Hw_loin_34_050705_F11 Bos taurus CF-24-HW loin cDNA library Bos taurus cDNA, mRNA sequence [DV793268]///Bos taurus serum amyloid A 3 (SAA3), mRNA [NM_181016]	TTGTAGTTGGCTTCTTTCATGTCTTGGTAAGCTCTCCACATGTCTTTAGCCCCTTGACCA///TTGTCTGCACCCCTGTAGTTGGCTTCTTTCATGTCTTGGTAAGCTCTCCACATGTCTTTA///TAAGTAACGCCAGAGAGACTATTCAGGGAATCACAGACCCTCTGTTTAAGGGTATGACCA///TGATCAGTAACGCCAGAGAGACTATTCAGGGAATCACAGACCCTCTGTTTAAGGGTATGA///GGCTGTGAGTCCCTAAGGGCAGAGACACTGACCTAGAGAGTTCTCTGTCCTCAGAAGGCA///CCCCAAGATCGAACCCGGCCAAGGAGAAAAATTATGACATGGAAAATAAGGTGCAAAAAA
A_73_P086136|507688	0.0221649	0.00249915	up	3.54545	3.54545	1.82597	GLDC	Bos taurus glycine decarboxylase (GLDC), mRNA [NM_001192951]	CACTGAAGAAATCTTTTTCCTCCTCCTAATTTACTCAATCTGTAATAGCATTTCTGAGTG
A_73_P066806|524813	0.0282098	0.00368053	up	3.49353	3.49353	1.80469	FOXF1	forkhead box F1 [Source:HGNC Symbol;Acc:HGNC:3809] [ENSBTAT00000000009]	TGGCGGGGGCCTGATCTGACTGCAGCTGTTGATAAATAAGTATCTATTTTTGATCCGACT
A_73_P103746,A_73_121270,A_73_P117406|404070	0.00677358	0.000311135	up	3.43957	3.43957	1.78223	MT2A	Bos taurus metallothionein 2A (MT2A), mRNA [NM_001075140]///Hw_loin_23_050701_B04 Bos taurus CF-24-HW loin cDNA library Bos taurus cDNA, mRNA sequence [DV797790]	GCGGGGAGAGCCTGCTCCCCGGTGTAAATAGAACAACGTGTACAAACCTGCATATTTTTT///CCTGAAGGCGGGGAGAGCCTGCTCCCCGGTGTAAATAGAACAACGTGTACAAACCTGCAT///GGATTGAAAAATGTTCTTAAACGCTTTTCCGCGAAACACCACAATCCCTTCCCCCTTTAA
A_73_P103046,A_73_P167587|618238	0.011692	0.000861039	up	3.33776	3.33776	1.73888	M-SAA3.2	Bos taurus mammary serum amyloid A3.2 (M-SAA3.2), mRNA [NM_001242573]///CR850558 Normalized and Subtracted bovine endometrium tissues (bcbp) Bos taurus cDNA clone bcbp0005.d.02 5', mRNA sequence [CR850558]	AGAGAGTTCTCTGTCCTCAGAAGGAAGCAGATCTAATAAATGCTTAAGAGATGGAAAAAA///TTTCCAGTAACGCAGAGAACTATTCAGGGATCACAGACCCTCTGTTTAAGGTATGACCAG
A_73_108382|539237	0.0250402	0.00306596	up	3.28985	3.28985	1.71802	OR7D2	olfactory receptor family 7 subfamily D member 2 [Source:HGNC Symbol;Acc:HGNC:8378] [ENSBTAT00000023594]	TCTCACCTCTCAGTTGTTTCTTTATTTTACGGGACAGGTGTGGGGGTCCATTTCACTTCT
A_73_P205932	3.10471e-05	2.88699e-09	up	3.22004	3.22004	1.68708		Rep: Prostaglandin F synthase-like1 protein. - Bos Taurus, partial (62%) [TC462112]	GGCTTTTCTTATGATTTTCCTGTAGAAATGTGTGTGTGTGTTTTCACTTACAAAGGGAAA
A_73_P151856	0.0155717	0.00142072	up	3.07962	3.07962	1.62275		768873 MARC 6BOV Bos taurus cDNA 3', mRNA sequence [CB535449]	TGATCAAACATGTGTCTCTGTTGGCAGGTGGGGGAGATTTACCTTTTCTAATGAGTTTGC
A_73_P486485	0.0104757	0.00068988	up	2.98401	2.98401	1.57725		Rep: Olfactory receptor 15 - Rattus norvegicus (Rat), partial (96%) [TC397773]	GTAGTTGTTCTCTTCTTTGTCCCTGTTGATTTTGTTTACATTCATCCAGCCTCAAGTAGC
A_73_110222|517587	0.00367589	9.55028e-05	up	2.94575	2.94575	1.55864	INHBE	Bos taurus inhibin beta E subunit (INHBE), mRNA [NM_001205842]	TCTACCTTGACCGTGATGGCAACGTGGTCAAGACAGATGTGCCGGATATGGTGGTAGAGG
A_73_110938	0.0317641	0.00441592	up	2.90387	2.90387	1.53798		GB	TTATTATGGCTATCATTTGCATGGGATCTGGAGAGGGTCGCCGAAAAGCTTTTGCTACCT
A_73_114075	0.00195968	2.86027e-05	up	2.89083	2.89083	1.53148		C39550A FLM Bos taurus cDNA clone C3955 5', mRNA sequence [EE926014]	GTGTTCTCTAGCCCTATGTCTCCAGCATCAACTCACCTTCGATTCCAGCAGGTTTTTATT
A_73_P137566	0.00353722	8.81942e-05	up	2.87927	2.87927	1.5257		1184112 MARC 7BOV Bos taurus cDNA 5', mRNA sequence [DN283875]	TTGGTGGTGGTGTGAGTTCTGTTGACTTTACAGTATGGTTTCTTGGTGTTTTCTCTTGGT
A_73_114316	0.00395039	0.000110806	up	2.86575	2.86575	1.51891			ATGGTCAAGGTTGCTGTTTTTTGCTATCACTTCTGGATTGTGCTTTGCCTGGTGTTTCTT
A_73_101122|100848266	0.0193565	0.00200143	up	2.83143	2.83143	1.50153	TMEM200B	Bos taurus transmembrane protein 200B (TMEM200B), mRNA [NM_001302948]	TGCATCGAACATTCCAAGTCTTTGGATCTGGGCCTCGGAGAGCTCCTGCTGGGGGCCCCA
A_73_112397|615863	0.00241591	4.0957e-05	up	2.82388	2.82388	1.49768	ZC3H12D	zinc finger CCCH-type containing 12D [Source:HGNC Symbol;Acc:HGNC:21175] [ENSBTAT00000009713]	AGGCTCATGCTCCTCATCCAGAGATTCCAAAGGTCCAGTGCGCCCGTGGGGAAGCGCTGA
A_73_P040981|404071	0.00864037	0.000485629	up	2.82153	2.82153	1.49648	MT1A	Bos taurus metallothionein-1A (MT1A), mRNA [NM_001040492]	GCCCTGTGGGCTGTGCCAAGTGTGCCCAGGGCTGTGTCTGCAAAGGGGCCTCGGACAAGT
A_73_102498	0.0297051	0.00397316	up	2.73769	2.73769	1.45296		Rep: B7-2 costimulatory molecule isoform 4 - Ovis aries (Sheep), partial (5%) [TC474930]	CTTTACAAGACACTTAGCATCTGCTTCTCTTCACTTGTGGGGGGAACTATGTATTCATAT
A_73_P095891|534842	0.00333805	7.95321e-05	up	2.7116	2.7116	1.43914	ROBO2	Rep: LOC534842 protein - Bos taurus (Bovine), complete [TC395811]	TTTGTTGTGCATGGCACTTCCGTTAGGTGGGCTCGGCTTTGTTGTGGAATAAACTGAAAT
A_73_118201|281778	0.00706076	0.000336188	up	2.68419	2.68419	1.42449	GCNT1	Bos taurus glucosaminyl (N-acetyl) transferase 1, core 2 (GCNT1), mRNA [NM_177510]	CACTGCTTGTTTCTTCAAGTTACCGGCCACTGGGTAGTCCTTAGCTTTTGCATTGTAAGT
A_73_119048|282243	0.024	0.00285498	up	2.66328	2.66328	1.41321	GUCA1A	Bos taurus guanylate cyclase activator 1A (GUCA1A), mRNA [NM_174546]	TGAGCTCACTGCCTACTCTTTCTGTACTGGGGAGGGTGTGTACGGTGGTGCCTGCTGTTT
A_73_P185987	0.0432564	0.00720223	up	2.65899	2.65899	1.41088		G45551A FLM Bos taurus cDNA clone G4555 3', mRNA sequence [EE941847]	TTTATTCAAGCGCTCCAGTGTTGCTGTCCGTTTGCCCCGAATGCAATCGACGTGGGGGAG
A_73_100890,A_73_115302|531476	0.00269922	5.05044e-05	up	2.60642	2.60642	1.38207	JDP2	Bos taurus Jun dimerization protein 2 (JDP2), mRNA [NM_001193245]	GACCGACAGCGTCAAGACACCTGAGTCAGAAGGCAACCCTCTGCTTGAGCAGCTTGAGAA///GGGAGGGGGTGGGGTGTGTTTCCATCCTGGTAAACCCTTCATAGTACTCAGTCCTGTATC
A_73_P488438|786890	0.0424535	0.00697978	up	2.58618	2.58618	1.37082	FBXO48	Bos taurus F-box protein 48 (FBXO48), mRNA [NM_001205456]	AGAAAAAATCATGTACCCAATGGATGCAGACACGTGGGGGGAAATTCTAGAAGCAGAACT
A_73_119505	0.0407012	0.00653177	up	2.56548	2.56548	1.35923		Rep: Germ cell-less protein short isoform - Rattus norvegicus (Rat), partial (40%) [TC481641]	AGATGTGGTTTTCCCCATATACGTGACCTGTAATTTCCTATACCTCCCCAGAGAGGGGCG
A_73_110041|617289	0.00275605	5.23008e-05	up	2.55811	2.55811	1.35508	CCDC184	Bos taurus coiled-coil domain containing 184 (CCDC184), mRNA [NM_001078073]	TTCCTCTTCCTCTGTGTATTCCTTCTCAATGCTTTCCTTGGTGTTAACCTTAATAAAGAG
A_73_112265,A_73_P367536|519193	0.00051691	1.63945e-06	up	2.55349	2.55349	1.35247	GPR21	Bos taurus G protein-coupled receptor 21 (GPR21), mRNA [NM_001098047]	GCTGTGTGTTTTGTGTGTGTGTTTCCTTTTTATCTTTTTGTATCTCTAGTTCTCCGGGAA///TCCTTTTTCCACTGGGGCAAACCTGGATATCATGGAGATGTGTTTCAGTGGTGTGCAAAA
A_73_P061040,A_73_P489287|511657	0.00324691	7.36244e-05	up	2.5332	2.5332	1.34096	LOC511657	Rep: olfactory receptor Olr1231 - Rattus norvegicus, partial (97%) [TC397834]	TACCATCTCATATGTGGGGTGCATGACTCAGCTGTTTTTCTTTCTCTTTTTTGTCATCTC///GTGGGGTGCATGACTCAGCTGTTTTTCTTTTTCTTTTTTGTCATCTCTGAGTGCTATATG
A_73_P054146|523753	0.0101886	0.000655118	up	2.53035	2.53035	1.33934	LOC523753	GB	GATACCACTTTCCTTCATCCTGGTCTCTTATGTTCGCATCTTTGTCTCCATCTTAAGCAT
A_73_114694	0.0115632	0.000843289	up	2.52828	2.52828	1.33816		protein tyrosine phosphatase, non-receptor type 20 [Source:HGNC Symbol;Acc:HGNC:23423] [ENSBTAT00000019887]	ACAGGGGTGTTCCTGTGTGTGGATGTCGTATTCTGTGCCATTGAAAAGAACTTTTCGGAT
A_73_P119916	0.0221669	0.00250108	up	2.5223	2.5223	1.33474		964047 MARC 2BOV Bos taurus cDNA 3', mRNA sequence [CK777053]	TCCTTCTCCACCACCTTAATGTGCTTCACCTCGTCGTTGAACTTGATACTTATGGCAAAG
A_73_105774	0.000252147	1.51786e-07	up	2.49058	2.49058	1.31648		HW_Fat_67_050831_B03 Bos taurus CF-24-HW fat cDNA library Bos taurus cDNA, mRNA sequence [DV776802]	GACTGCTAGTGGACTCGGTATTTGTGTGTGTGTGTGTTTTCACTTAAAATGGCTGTCTCA
A_73_103505	0.0139748	0.0011739	up	2.46503	2.46503	1.30161		GB	TGTTGTTCTTTCTTTCTGTTTGTCAGGGGTGATAGCCATATCTTCGTGCTCCTGTTGCGA
A_73_107605	0.0276125	0.00354356	up	2.46213	2.46213	1.29991		Rep: Cell divisionFtsK/SpoIIIE protein - Ehrlichia chaffeensis str. Sapulpa, partial (3%) [TC420891]	ATGGGTCAACCTCATTCTTCTTAGCTGCTGTGTTACATTCCGCAGTAAAGATTACCTTGG
A_73_P034726,A_73_P306106,A_73_P365636|538465	0.0325789	0.00460757	up	2.45338	2.45338	1.29477	TRIB3	Bos taurus tribbles pseudokinase 3 (TRIB3), mRNA [NM_001076103]	TGGAAAGTCTCAGGTTCAGGACCCTACATTAACACTATGGGTTTATATGCCATGAGTGTG///AGTGCAAAACATGAGGCTGGTCCTCATCTTACTGAAAAGAGTAATTTGGAGTGAGGGCCT///TGGAGCTGGATGATGACCTAGACACTGAGTGTCCCAGCCAGAAACAAGCTCGAAGTGGGC
A_73_109336	0.000864163	5.14736e-06	up	2.45282	2.45282	1.29444		Rep: PREDICTED: RIM-binding protein 2 - Pan troglodytes, partial (19%) [TC423088]	TTCAAAGGAAATTACTCTCTGTGTGGTTAACTTCTGCGTGGGTGTGTGCATGTGTACAGC
A_73_102311	0.00051691	1.64827e-06	up	2.42705	2.42705	1.2792			TATTAATAGGTGTGTGTGTGTCCAAGTGCAGGCATATAAAAACTTCAATTTTCTGACTTG
A_73_P164647	0.00988783	0.000621812	up	2.42419	2.42419	1.2775		LB02727.CR_F07 GC_BGC-27 Bos taurus cDNA clone IMAGE:8316297, mRNA sequence [DV893522]	TACTGTCTTCAGTGTTCACTTATCTTGCTGGTGGGGCCATGGAAATGCTTGATCTTTTGA
A_73_103769	0.00781895	0.000406323	up	2.41727	2.41727	1.27338		Rep: Mucin 13 - Sus scrofa (Pig), partial (96%) [TC421120]	AGTCTTTCTTTAATGTTAACAGTATCCTTGCTTGTGTCTAATGTCCTGTCTCCGTGCAAG
A_73_P115013|788079	0.00879178	0.000497832	up	2.40621	2.40621	1.26676	LOC788079	GB	TTTATGCCCTTTCATTGGTATTGTATGTTCCTATGGCCGTGTTCTCCGTGTGGTCCATCA
A_73_104016	0.0303341	0.0041094	up	2.4009	2.4009	1.26358		Rep: DJ-1 family protein - Dehalococcoides sp. (strain CBDB1), partial (11%) [TC425514]	TTTTTTGGTTGTTTAAGTCAGTGGTCTTGAGGTCGCCTGTCCTCATGTCTGTTTGCCTTC
A_73_P486752	0.0423236	0.00693076	up	2.3854	2.3854	1.25423		GB	TGATCTTCGCAGGTGTTAATGTGATCCTCTCCCTTCCAATAATTCTTATGTCTTATTTGC
A_73_P171167	0.00303097	6.31886e-05	up	2.38158	2.38158	1.25192		150465 MARC 4BOV Bos taurus cDNA 5', mRNA sequence [BE666796]	GTCTTTGCTCTGCCATCTTTCACCACTTCCAGCGTTTGTCATTTACATAATGTGAGAGCC
A_73_P149431	0.0273855	0.00349982	up	2.37825	2.37825	1.2499		PREDICTED: Bos taurus glycoprotein Ib (platelet), alpha polypeptide (GP1BA), mRNA [XM_581184]	GGGGTGGTTTTCTGTTCTTTCCCTCTGTTTACCATTTTCTAGTTTTCCACCATCGTAATG
A_73_P130981	0.0104978	0.000696918	up	2.37421	2.37421	1.24745		SHC adaptor protein 3 [Source:HGNC Symbol;Acc:HGNC:18181] [ENSBTAT00000015112]	TCTTTGACATGAAGCCTTTTGAAGATGCTCTCAAGATTCAGTCCTTGGGGCCTGTGTTGA
A_73_111821	0.0096855	0.000597415	up	2.36017	2.36017	1.23889		Rep: Tyrosine-protein kinase - Sus scrofa (Pig), partial (14%) [TC456365]	GACTGTGGTGGGTTTTTGATGCTGCATGTATGGGCTTTCTCTAGTTGTGGTTAAAGCTAT
A_73_P400986,A_73_P038211,A_73_110135,A_73_P170562,A_73_P410301|280936	0.000252147	1.05774e-07	up	2.35879	2.35879	1.23805	SV2A	Bos taurus synaptic vesicle glycoprotein 2A (SV2A), mRNA [NM_173962]///Rep: Synaptic vesicle glycoprotein 2A - Bos taurus (Bovine), complete [TC423652]	CAACATGCGAGCCAAGGGGCATCCTGAGCGAGTCTTCTCGGTAACCCACATTAAGACAAT///TACTGTCCTAAAATACAAGCCAAGGGTAATTTCAGTGGACACACACACAGGTACCTGCTC///CCTGGAGGGACCCATCCATCTCCCTTACTCTCCTGGGGAACCCTAAATCTAACTCTGTTG///TTCTGAGGCAGCTCAGCAGGACTGTGTGTGTGTGAATGCTTGTATACACTTATGTATGTG///TAGTCTTAGCCATGTATGCGTGAGTGTGTGTGTGTATGTATGTGTGTGCATGTGTGAGAC
A_73_115411	0.0416759	0.00678049	up	2.35348	2.35348	1.23479		dynein axonemal heavy chain 10 [Source:HGNC Symbol;Acc:HGNC:2941] [ENSBTAT00000029664]	AGGAGGGGGATTGACACTGCTTTTTCCTTTCATTTGAAATCCATTTTCATCTTTTTCCAT
A_73_P153066|618071	0.0121835	0.000921801	up	2.33676	2.33676	1.22451	LOC618071	Bos taurus uncharacterized LOC618071 (LOC618071), mRNA [NM_001206718]	TAAATTCTGTACGACCCCCGGTCAACTCTCTCTTCTCGCAGCTCTGGTCCCAAGGCTGGT
A_73_102240	0.00571645	0.000231146	up	2.33518	2.33518	1.22354			ATTGTGTGCAGCTGGTGGCTTTTTCCTATATGAGTGGTTTCATGGTCTCTGTATTCAAGG
A_73_P081116	0.00695993	0.000326133	up	2.33201	2.33201	1.22157		solute carrier family 35 member F1 [Source:HGNC Symbol;Acc:HGNC:21483] [ENSBTAT00000047815]	GGTTGTTTCTCTTCCATTACAAGTTTTCAGGACTGTATCTCCTGTCTTTCTTCACCATCC
A_73_112614|537946	0.0286288	0.00376798	up	2.32685	2.32685	1.21838	CDH6	Bos taurus cadherin 6 (CDH6), mRNA [NM_001034640]	GCCTCGGTTCAAAAAGCTCGCGGATATGTACGGAGGGGTGGACAGTGACAAGGACTCCTA
A_73_P170617	0.0359885	0.00538384	up	2.32633	2.32633	1.21806			AAAGGGTTTTGTTTAAAATAAAAAAGCTTTTTCCCGAGGGGAAGGGGGGAGTTTGGTTTG
A_73_P201967,A_73_121006|519165	0.0104775	0.00069183	up	2.32546	2.32546	1.21752	HLX	Bos taurus H2.0 like homeobox (HLX), mRNA [NM_001101097]	TAAATTTAGCTCTTAAGGCTTAGCTGTTTGGGTGTTTCTTTCGGTGCCCGATTCCCGTCT///AGGTTTGAGATTCAGAAGTACGTGACCAAGCCAGACCGAAAGCAGCTGGCCGCGATGCTG
A_73_P488038|100847250	0.00787996	0.000412502	up	2.32288	2.32288	1.21592	LOC100847250	PREDICTED: Bos taurus major allergen I polypeptide chain 2-like (LOC100847250), mRNA [XM_003582892]	TATAAATTGTCCTCGGTGGTGAATGCTGTTAGAGGATTGGCTTCCAGTCTGCTCTCTTTG
A_73_119503|614542	0.0157369	0.00144631	up	2.31645	2.31645	1.21192	NEU2	neuraminidase 2 [Source:HGNC Symbol;Acc:HGNC:7759] [ENSBTAT00000027552]	AGATTGTCTTTGTCATGTTCACCCTGCAGCAAGCCTTCCCAGCTGCGTTTTTGCTGCAGT
A_73_P340221,A_73_104807|614893	0.00140234	1.56887e-05	up	2.30981	2.30981	1.20778	CDCA7	Bos taurus cell division cycle associated 7 (CDCA7), mRNA [NM_001037488]	GCCCCATGCCGTCCTTTTATTTCCAGTGATTTTCCTCCATCATTTAGTTTGGGAATCTTT///CTGTAGCTCTGCCGGTTCGGTTCAGTGTTTGGTGCATAATTGGACCTTGAATCAATACAT
A_73_108119	0.0182773	0.00182355	up	2.30953	2.30953	1.2076		CR451603 Normalized and Subtracted bovine embryonic and extraembryonic tissues (bcaz [CR451603]	TGTGTGACATCACATGTTAAGAATTCCTGCTCTAGAGTAGTAGCCTTCAAAATTTGAAAG
A_73_P095811|100141020	0.0101573	0.000650007	up	2.30951	2.30951	1.20759	KRTAP27-1	keratin associated protein 27-1 [Source:HGNC Symbol;Acc:HGNC:33864] [ENSBTAT00000006318]	GGTTCCTCTTTTCACTATTTAAGTGTTTTGGGGTGTGTGATTTGGGAAAATATTCTTTGT
A_73_105553	0.00288431	5.7658e-05	up	2.29643	2.29643	1.1994			CTGGGTCTGTGTCTAGGCTCTGTCTTCCTTTGTTGATCTTTCTGTTCACTCCGTTTCAAA
A_73_P033621,A_73_P463986,A_73_P268496|768207	0.000459774	1.05332e-06	up	2.2943	2.2943	1.19805	SS18L1	Bos taurus SS18L1, nBAF chromatin remodeling complex subunit (SS18L1), mRNA [NM_001078095]	TTTGCCAATATGGGAATATGCCTTTTGTGTATGTGTGTGTGTGTTTTTAAGTGCTGTATT///ATCAGTCTCTGTTGTTACCCAATGGAAAGGATAAATAAGCTTCACTTGGAGAGGCTGTGA///GCTCATGTGGAAAAGTCAGGTCAAAGGAAAAATTCTACATTTCACTAGTAAGTCATACAG
A_73_119781	0.00928282	0.000553283	up	2.29316	2.29316	1.19734			CTCTGTTTTGGCCTGTGTCAAGCCCTGTCTCTGTGCTTAGGAAGTTTTGATACTCCTTTT
A_73_P083906|615150	0.00746194	0.000376374	up	2.28562	2.28562	1.19259	LOC615150	GB	TCTTCACCCCCTTTCTTAGCCCCATCATTTTCAGCCTCAGGAATAAAGAGCTGAAGAATG
A_73_P075396|782766	0.00998845	0.000633097	up	2.28026	2.28026	1.1892	OR10A3	GB	GTCCTTGGCTTACTCTCTTCTTACACCTCTGCTGAATCCACTGATATATAGCTTGCGCAA
A_73_P491338	0.00140058	1.5562e-05	up	2.27065	2.27065	1.18311			ATGGTCATTGCTGTGATGTATTTCAGCATCTTGTATCCAGGTTTGCCAGCCTCGTCTTGA
A_73_114671	0.000989581	7.1579e-06	up	2.26275	2.26275	1.17808		Rep: Heavy-chain fibroin - Galleria mellonella (Wax moth), partial (6%) [TC454898]	TGCCCCTCGCGGGACCACTGCTGTTGTTGCTGGTGTCCCCTTGTGATATGCAGGTTTTAT
A_73_P072541,A_73_P476493,A_73_P072536,A_73_P072546|407152	0.000252147	1.37172e-07	up	2.26141	2.26141	1.17722	PTPRC	Bos taurus protein tyrosine phosphatase, receptor type, C (PTPRC), mRNA [NM_001206523]	ATGATCTGCATAAGAAAAGATCCAGCAATTTAGATGAGCAGCAGGAACTCGTTGAAAGGG///CTCAAGATGGCCTCCTTGTCCTGGTGAAATACATTTTATGATTTCCTATTTTAATTCCAG///AGTACATCTTGATTCACCAGGCCTTGGTGGAGTACAATCAGTTTGGAGAGACAGAAGTGA///TCTATCATCCAGCAAGAAGCAGCTTGTTTGTAGTCTTTGTGTGTGTGTGTGTGTGTGTGA
A_73_109766|516626	0.0381087	0.0058844	up	2.25824	2.25824	1.1752	SLC51A	Bos taurus solute carrier family 51 alpha subunit (SLC51A), mRNA [NM_001025333]	AGGATGAAATTGTTTTGGATCTTGCCTGAGGAAGGTATTTTAAGCTTAATAAACAGGATG
A_73_101333	0.00245022	4.19707e-05	up	2.24485	2.24485	1.16662		Rep: MGC80202 protein - Xenopus laevis (African clawed frog), partial (8%) [TC418929]	TGGGGCCCGTGTGCACTTGGCGTCATGTGTGGTCCTGTCTCCAATAAAAAGTCTCGTGGT
A_73_P471298	0.0121316	0.000916236	up	2.22882	2.22882	1.15628		Rep: Poly (ADP-ribose) polymerase family, member 4 - Homo sapiens (Human), partial (8%) [TC478516]	GCCGAATCTTTTTTCCTGTTCTGCAAGTCTTCTCCCTTGTCCACTTGTAAAGTCTGTCTT
A_73_P112836	0.0139953	0.00117872	up	2.22793	2.22793	1.1557		GB	TGATCACATCATTAAGGTGTCCTCTTGTGCCTCAGCTGGATTCTTGATCCTATCACTGTC
A_73_120394	0.00108885	8.96189e-06	up	2.22669	2.22669	1.1549		olfactory receptor family 10 subfamily J member 1 [Source:HGNC Symbol;Acc:HGNC:8175] [ENSBTAT00000064894]	TGACTTTGATCATCAGTGTTTTCGTGCTCGTTGTGCCTATGGGTCTGGTCTTCATCTCTT
A_73_107639|531488	0.0285212	0.00374511	up	2.21512	2.21512	1.14739	WASF1	Bos taurus WAS protein family member 1 (WASF1), mRNA [NM_001034017]	GTGGTGCTTGTTCTTTGAAAATGTTTGGTCATTCCAGTGTTTTGCTTTCTTTTCCTTAAG
A_73_108250,A_73_P081861|530858	0.00947871	0.000574076	up	2.2146	2.2146	1.14705	PRKN	Bos taurus parkinson protein 2, E3 ubiquitin protein ligase (parkin) (PARK2), mRNA [NM_001199065]	TCCAAAGAAACAATCAAGAAGACCACCAAGCCCTGTCCCCGCTGCCACGTGCCGGTAGAA///TTGCTGGGAAGATGTCTTAATCCCAAACCGAATGAGTGGTGAATGTCAGTCTCCAAACTG
A_73_115604|513006	0.0109239	0.000760461	up	2.21152	2.21152	1.14504	NKG7	Bos taurus natural killer cell granule protein 7 (NKG7), mRNA [NM_001035279]	GGTTCCCTCTCTGATTTAGTCACCCTGCCGTTCATCCTTAGTCCTTGTTCATTTCATTAA
A_73_P068545	0.0325697	0.00460379	up	2.20957	2.20957	1.14377		GB	GTGGTTCTGTTCATCCTCACCTACTGAAATAGGTATGAGTTATTTGTGGTCCATCTCTGA
A_73_P068211	0.0164076	0.00154801	up	2.20935	2.20935	1.14362			ATTTCTGTGTGTTTTCCCTTTATCAGTCCCTTTCTGCTCATGAGCCGTGACTCCACTGTA
A_73_115912	0.0263553	0.00331479	up	2.20793	2.20793	1.14269		Rep: WD repeat-containing protein 63 - Homo sapiens (Human), partial (19%) [TC461158]	TAGAGGTGTTTTGGGGGTCTGTGGGAATTTTCTTTTTGCTCATTATTTTTTATGTAAGGT
A_73_P076846|514366	0.00159455	1.94883e-05	up	2.2067	2.2067	1.14189	OR4D9	Bos taurus olfactory receptor, family 4, subfamily D, member 9 (OR4D9), mRNA [NM_001206742]	TGGTTCATATTCTTCTTTCTCCTCGTCTCCTACACAGTCATTCTGACAATGCTGAGGTCC
A_73_P076081	0.0171791	0.00166871	up	2.20248	2.20248	1.13913		GB	TTCTTCGGGCTTGTTCTGGCGCTCATCGGCCTCATCTTCCTTATGGTGCTCTACCTAAAC
A_73_120169	0.0125751	0.000976624	up	2.1992	2.1992	1.13698		Rep: PREDICTED: lymphocyte antigen 6 complex, locus H - Bos taurus, complete [TC398048]	GAGGGGCTTGTCGGAGGATGTCTCCCACTCCGTTTTAAGTTTGCTCTGCTGCTCTGCGAT
A_73_P494402	0.00378646	0.000101122	up	2.19703	2.19703	1.13555			CCATACGTTACATACGGGGTACCCAAATTGAAGTCTGTAAATGAATTGATCTACAGGCGT
A_73_P039131|785213	0.00123443	1.25176e-05	up	2.1965	2.1965	1.13521	MGAT5B	mannosyl (alpha-1,6-)-glycoprotein beta-1,6-N-acetyl-glucosaminyltransferase, isozyme B [Source:HGNC Symbol;Acc:HGNC:24140] [ENSBTAT00000006729]	TTACCTCTTGTCTGTGTTTACTGTTGTCTGCCTCTTTCATCTGGACCATAAGCGCCTTCA
A_73_P084276|101902412	0.00749328	0.000379946	up	2.18543	2.18543	1.12792	ANGPTL8	angiopoietin like 8 [Source:HGNC Symbol;Acc:HGNC:24933] [ENSBTAT00000045880]	ATGGTTGAGGAAGGCTGTAGGAAGGATATGCCCCTTCATGCCTACACATTCCCTATTAAA
A_73_P250966,A_73_103475|511556	0.0145242	0.00126498	up	2.18327	2.18327	1.12649	SLC46A2	Bos taurus solute carrier family 46 member 2 (SLC46A2), mRNA [NM_001024519]	TGGGTGGGGGAAAGCACTTAACTGGTGATGGAGACACTTTCTCAGCTTTCGGATGTTGCT///GAGGTGTGAAAGGAGAGGGGAGATACGCTAACACCATTTTATTTTGAGGCACTTACTGTT
A_73_107978|107131158	0.0127388	0.00100066	up	2.18205	2.18205	1.12568	LOC107131158	olfactory receptor family 1 subfamily N member 1 [Source:HGNC Symbol;Acc:HGNC:8221] [ENSBTAT00000053513]	GTGCTCATGGTCCCCTTCATATGCATTGTCATCTCCTACATTCACATTGTATCTGCCGTT
A_73_P113171	0.0387333	0.00605772	up	2.17888	2.17888	1.12359		PREDICTED: Bos taurus polycystic kidney disease 1-like 2 (PKD1L2), transcript variant X2, mRNA [XM_015467272]	AAGAAAACGATGACTTCATGTTGACAGTGGTCATTTCTGTCTCCAATCATGTGGGGGGCA
A_73_106958	0.0234169	0.00274118	up	2.17553	2.17553	1.12137		melanocortin 2 receptor accessory protein [Source:HGNC Symbol;Acc:HGNC:1304] [ENSBTAT00000032472]	TTCGTGGTTTTTCTCTTCCTCATCCTTCTCTACATGTCCTGGTCAGGCTCTCCACAGACA
A_73_P129396	0.000252147	1.20538e-07	up	2.17272	2.17272	1.1195			GTGTATGTGTGTGTGTTTTCCCCATTCACCAATTCCTCTTTTATCAGCAAGATGATTTTT
A_73_108761|540044	0.0132789	0.00106879	up	2.16929	2.16929	1.11722	GPR84	Bos taurus G protein-coupled receptor 84 (GPR84), mRNA [NM_001038568]	TGGGGCGCTATCTCCTCATTGCCCACCCTAAGCTCTTTCCCCAAGTTTTCAGTGCCAAGG
A_73_P030301,A_73_P362371|768084	0.000411799	7.85018e-07	up	2.16421	2.16421	1.11384	ZSCAN12	Bos taurus zinc finger and SCAN domain containing 12 (ZSCAN12), mRNA [NM_001077138]	GGGATGCTGGTGTTCTCTGTTTTATACTTCTCTTTTTTCCCACCTCTGTGTTATGAATTC///CAAATGTGATGTATGTGGAAAAGCCTCTTATTCAGAGGACAAGTCTTATAGAACATCAAC
A_73_101662,A_73_P268676|512732	0.000459898	1.07116e-06	up	2.16313	2.16313	1.11312	STMN4	Bos taurus stathmin 4 (STMN4), mRNA [NM_001075580]	TGTGACGGGGGGATGAGGTGTGAATGTGTGTGCGTGTGTTAACCATTATCTTTTGATCAT///TTCATCAAGATGGCAAAGGAAAAACTGGCCCAGAAGATGGAATCCAATAAGGAGAACCGG
A_73_108372	0.0010009	7.41411e-06	up	2.15496	2.15496	1.10766		5-hydroxytryptamine receptor 3D [Source:HGNC Symbol;Acc:HGNC:24004] [ENSBTAT00000056946]	TCTTCCGTCTCTACCTGCTCTTCATGGCCACCTCCGTTGTCACAGTTATTATTCTCTGGA
A_73_P034906,A_73_105369|523073	0.0221285	0.00248961	up	2.1534	2.1534	1.10661	KRT85	Bos taurus keratin 85 (KRT85), mRNA [NM_001101111]	CTGTATGGCTTCTTCTCTCTTTTGGTTGCATGATTAAATGTCGTGGTAAACATTTTCTCC///AGATGAAGGTCACAGTAACACAGCAGGGTGAGAACCTCCGCAGAACCAAGGAGGAGATCA
A_73_103273	0.0106176	0.00071392	up	2.15056	2.15056	1.10471		PREDICTED: Bos taurus uncharacterized LOC100847429 (LOC100847429), miscRNA [XR_139471]	GGCTTGCTTGGCAGGAGCCGGTCTTTGCATGTAGCCCCTTTCCAATGTGCTGTGTACCAT
A_73_114956	0.0335585	0.00485502	up	2.14737	2.14737	1.10257		chromosome 11 open reading frame 53 [Source:HGNC Symbol;Acc:HGNC:30527] [ENSBTAT00000061525]	CTCCAGGACACTTCTCCGTGGACCAAAGAAGACGGGAGCCTGGCGTGGGGGACATACGAA
A_73_110678	0.0083306	0.000453737	up	2.14153	2.14153	1.09864			GACTGCTGCCTTCTGGTTTCCTCTTTTTCTTTTAAGAATATGAAAGATTTTTGTAATTAA
A_73_117821,A_73_P268996|533630	0.0431208	0.00714825	up	2.13115	2.13115	1.09163	PSPH	Bos taurus phosphoserine phosphatase (PSPH), mRNA [NM_001046355]	AAGAAGAAGGAATTGATGAGCTGGCCAAATTCTGTGGAGTTGAGGATGCCGTGTCAGAAA///ACACCTTCACTATTGGGAATGTGGATTAGGCAGCTTTAAATGAAATTGGTTTTCCCTTTA
A_73_107259|509916	0.0191154	0.00195825	up	2.12981	2.12981	1.09072	OR2S2	olfactory receptor family 2 subfamily S member 2 (gene/pseudogene) [Source:HGNC Symbol;Acc:HGNC:8276] [ENSBTAT00000039087]	CTGGCTCCTGGGCTATTGGTGGTGTTGCTTCTCTGGTTCACACATCCTTGGTAATTCAGC
A_73_106929	0.00875402	0.000494357	up	2.12484	2.12484	1.08736		Rep: ATP-binding cassette sub-family A member 1 - Bos taurus (Bovine), complete [TC391400]	AGGCATATTTCTATGTTGTTATAAGTCACGAAATAAAGTGATGCATTCGAAAATGAGGGG
A_73_P112371	0.00437096	0.000137521	up	2.12305	2.12305	1.08614		GB	TCTTCCACATGAGATCCCACCACAAAAAGGAGCATGCGGGGCCCAGCCTGCATTCCAAGA
A_73_P494913	0.0193658	0.00200313	up	2.12244	2.12244	1.08572			TCTGACGGCAGTGACTTCACTTTTCTAAGGCCCCTCAGCGTTCAGCAGCCCTCAGCTTTC
A_73_108567	0.0127388	0.0010007	up	2.11527	2.11527	1.08084		Rep: Isoform ZA of Q64568 - Rattus norvegicus (Rat), partial (21%) [TC433697]	TTCCGTTCTTTCTTTATTGCCCCGTTCAGTCCTTCCCACCAGATGGTGTGTCGCTCCAAA
A_73_P166107	0.0136967	0.00113216	up	2.11281	2.11281	1.07916			TCTGGGCTGGTGGAGAACAAAGGACTGTTCTTTAGGACTGAAACTTGATTTTGCTTGTAG
A_73_106801,A_73_P245891|505169	0.0474741	0.00832676	up	2.10512	2.10512	1.07391	GATA3	Bos taurus GATA binding protein 3 (GATA3), mRNA [NM_001076804]	TCTGTGTTCTCACTCCCCGAATCTGGATCCCATTTGTGAATAAGCCATTCAGACTCACAT///GCTTCCCTTTTACAATTTGGCCCGTTTTTGTCCTCCCGTACCTAATTTTGGGAATTTCTT
A_73_100992	0.00051691	1.70922e-06	up	2.09803	2.09803	1.06903		PREDICTED: Bos taurus protein tyrosine phosphatase, receptor type O (PTPRO), transcript variant X2, mRNA [XM_005198403]	TTTCCTGATTAACACTTCAGTGTTTCTTCCTTGCCCCTCTTGGACTAATATCACTGTTCA
A_73_P095381|789937	0.00676319	0.000309883	up	2.09522	2.09522	1.0671	WDTC1	Bos taurus WD and tetratricopeptide repeats 1 (WDTC1), mRNA [NM_001205398]	ATTTGTTAGTTTGGCATTGCGGGTGGGGATTGCTACAACTTGCTGGCTTTTGGACTTTTG
A_73_112093|530065	0.0145885	0.00127559	up	2.08297	2.08297	1.05864	GPR50	G protein-coupled receptor 50 [Source:HGNC Symbol;Acc:HGNC:4506] [ENSBTAT00000007808]	TGCTGCCACTGTTGACCCCCCTGTGGTCACCACTGATTACCGTGAGGTTGTGCTTAGTGA
A_73_P250826,A_73_P035266|510325	0.000309176	3.87302e-07	up	2.07771	2.07771	1.055	FAM214B	Bos taurus family with sequence similarity 214 member B (FAM214B), mRNA [NM_001014893]	ATTTATTCAAATTGGATTGCCTTGGTAACCTCCCAAACCTGATAATTGGCATTGCCCCCC///TCCTGAAAGCCAACTTGTGTGTGTGTATGTTTGTGTGTGTGTGTGTTGTGTGTGTGGTAT
A_73_108132|281153	0.00051691	1.60689e-06	up	2.07756	2.07756	1.05489	FATE1	Bos taurus fetal and adult testis expressed 1 (FATE1), mRNA [NM_174052]	CTTGGCTGTGTCTTCCCTGTTTTCTTCAATGTTGTGCTCAGGGCTCTGCACATAGAATAT
A_73_P039528,A_73_P409566|618633	0.000306496	2.77101e-07	up	2.07478	2.07478	1.05296	LOC618633	Bos taurus myeloid-associated differentiation marker-like (LOC618633), mRNA [NM_001103302]	TTGCCAAAGGAATTGCATTGTTTGAGTGTGAGGTGACACATGTGTGTGTTTCTGTGTATC///ATTGCATTGCTTGAGTGTGAGGTGACACGTGTGTGTGTTTCTGTGTACCTGTTGCTTTCT
A_73_109104	0.0143029	0.00123195	up	2.07411	2.07411	1.05249		Rep: Chromosome 14 SCAF15120, whole genome shotgun sequence - Tetraodon nigroviridis (Green puffer), partial (9%) [TC473484]	ATCTTGCTACTGCCATTGGTTTAGGACAGTGGTTCCTCACCCATTCATCCACATCAGAAT
A_73_P350516,A_73_P389096,A_73_P040976|282369	0.00981739	0.000613634	up	2.06812	2.06812	1.04832	SLC7A5	Bos taurus solute carrier family 7 member 5 (SLC7A5), mRNA [NM_174613]	TTTGAGACTGTTGGGGCCTCAGTTTTCTTGGGTGTACATGGGGCACTGCCCTCTGCCTCT///TTATCATCTCGCTCCCGATCGTCACCCTGGTGTACGTGCTGACGAACCTGGCCTACTTCA///GCTTTGGGATGGGGAGTTTTGTGTTTTGTTGGGGTAATTTGTTTTTTAAGAATTGGAATT
A_73_P102976,A_73_118045,A_73_P059321|282573	0.00167785	2.12695e-05	up	2.06386	2.06386	1.04534	KCNMA1	Bos taurus potassium calcium-activated channel subfamily M alpha 1 (KCNMA1), mRNA [NM_174680]	TGTGTCTATCTGCTCATGGTGACCATGTCCACTGTTGGTTACGGGGATGTTTATGCAAAA///GCATGACCTAGCCACTGCTGGGGGTTTTCTTCTATAACATTGTCCTTGTGAAAACTTTTG///ATACAATATGCTTTGTTTTGGAATTTATCGGCTGAGAGATGCTCACCTCAGCACCCCCAG
A_73_112747|618677	0.0464655	0.00805473	up	2.0638	2.0638	1.0453	GDF15	Bos taurus growth differentiation factor 15 (GDF15), mRNA [NM_001206298]	ATGGCCGCGTGTCACTCACGCCTTTTGACGACCTCGTGGCCAAGGACTGTCACTGCGTGT
A_73_P206427	0.0130014	0.00103009	up	2.06299	2.06299	1.04474			TGAACTTCCTCTTCTGTTCCAAATTGCCCTCATGGGTGCGGCATGCCTGGGTGAACCTGG
A_73_P065446|506648	0.00228987	3.67219e-05	up	2.06049	2.06049	1.04299	SLC47A2	Bos taurus solute carrier family 47 member 2 (SLC47A2), mRNA [NM_001192102]	ACATCTTCTTCCAGCTGTTTGATGCCCTCTGTTGTCTCTACGCTGGGGTCCTGCGTGGGA
A_73_P485318	0.00986961	0.000619012	up	2.06036	2.06036	1.04289		GB	TTTTTGTCTATGTGTTTCCCAACAGTCAGCCCCTTTGTGCTTATTTGCAGTGATACTCGT
A_73_P042831|613904	0.011792	0.000875731	up	2.05876	2.05876	1.04178	VGLL4	Bos taurus vestigial like family member 4 (VGLL4), mRNA [NM_001099128]	TATTCGCAAAAGCCACGTGGTGGGGTTTCTATTGTGTTTCGTTACTTGCTTGGTCTTCGT
A_73_101439	0.00569885	0.000229346	up	2.05833	2.05833	1.04147		C0009283O15.P1KAM13F KN510 Bos taurus lymphocytes [FE006181]	TGTTACCGTCTACATACCAACTCTGCCTTTCTGACAATAAATACACCTGACCCTGGAGAA
A_73_100836,A_73_P070011|386587	0.0127388	0.000999731	up	2.05794	2.05794	1.0412	GDNF	Bos taurus glial cell derived neurotrophic factor (GDNF), mRNA [NM_001192849]///PREDICTED: Bos taurus glial cell derived neurotrophic factor (GDNF), transcript variant X2, mRNA [XM_005221583]	GTGTTGCAGACCCATCGCCTTTGATGACGACCTGTCCTTTTTAGATGATAACCTGGTTTA///ACTCTAAGATGAAGTTATGGGATGTCGTGGCTGTCTGCCTGGTGCTGCTCCACACCGCGT
A_73_103735	0.0164076	0.00154737	up	2.05737	2.05737	1.0408		Rep: SPARC related modular calcium binding 1 - Bos taurus (Bovine), complete [TC434599]	CTCTCTCACACACGTGTGGAGGCTGAGTTGTGTGGTTTTCCTTTGTGAGGAGGGAGGGAG
A_73_P066551|100302388	0.0401769	0.00639088	up	2.0551	2.0551	1.03921	SMIM5	Bos taurus small integral membrane protein 5 (SMIM5), mRNA [NM_001163000]	AGAAAACCATCAGGGATTCTTTGCCGACCTGCACTTTTTAACAAAGCACAGAGCGTAGTC
A_73_P030896|618629	0.0219577	0.00244813	up	2.0517	2.0517	1.03682	GALR2	Bos taurus galanin receptor 2 (GALR2), mRNA [NM_001105010]	ACCAACCTGTTCATTCTCAATCTGGGCGTGGCCGACCTGTGTTTCATCGTGTGCTGCGTG
A_73_P114061	0.0347208	0.00509477	up	2.04589	2.04589	1.03273		signal peptide, CUB domain and EGF like domain containing 2 [Source:HGNC Symbol;Acc:HGNC:30425] [ENSBTAT00000027416]	GCTGCCTCTAGTAGCAGTGACTGGTTAGAGTTCAATTTTTATAGATAATACAGGTATTTT
A_73_101496|515434	0.0102261	0.000659481	up	2.04474	2.04474	1.03192	ACRBP	acrosin binding protein [Source:HGNC Symbol;Acc:HGNC:17195] [ENSBTAT00000048539]	ACTCTCCATTGCTTTCAGACCCTGGATTGTCTCTTACTTGGCCCGAATCACATGTCTTTT
A_73_P279256	0.00235423	3.80745e-05	up	2.04472	2.04472	1.0319		Rep: Zinc finger protein 462 - Homo sapiens (Human), partial (70%) [TC436313]	GTGGACATGTGTGTGTGTGCAAGTCGTTTGGTTTTCATGTTTCTTTTTGTTTTTGTTTTT
A_73_P068486	0.00475712	0.000165839	up	2.04139	2.04139	1.02955		LB011160.CR_A03 GC_BGC-11 Bos taurus cDNA clone IMAGE:0 5', mRNA sequence [EV619351]	AGAGCAGGTTTATATTCTCATCGGGGTCTCTGTGGCCTTTCTCCTTTGTCTCTCCCTCCT
A_73_108844,A_73_P045476|282365	0.000437152	9.7796e-07	up	2.04103	2.04103	1.0293	SLC6A4	Bos taurus solute carrier family 6 member 4 (SLC6A4), mRNA [NM_174609]	AATGTGTATGTGTGAGCATGTGTGTCTGTGTGTACAACTGTTCCAGTGTATCCTTACCCA///ACTTAAGGAGCGTATTATTAAAGGTATCACGCCAGAAACACCGACAGCAATTCCCTGTGG
A_73_P491003	0.00588	0.000244046	up	2.03807	2.03807	1.0272		Rep: Zinc finger protein 282 (HTLV-I U5RE-binding protein 1) (HUB-1). - Canis familiaris, partial (53%) [TC472285]	ACTTCTCCGAGGCTTGTTTCATGTTCTTGGATTTGCTACCGTCCCGACCTGTTTCCGTCG
A_73_P079126	0.0335165	0.00484256	up	2.03629	2.03629	1.02595			TGTTCCTCCCACATCACTGTTGTCTCTCTCTTCTATGGCAGCTGCATATTCATGTATGTC
A_73_P164712	0.0187861	0.00190084	up	2.03603	2.03603	1.02576			GGCTTTTCCACATATGTCACATTTATATGGTTTCTCTCCTGTATGAACTGCTTGATGTCT
A_73_P107676,A_73_118449,A_73_P108356|280828	0.0183935	0.00184216	up	2.03328	2.03328	1.02381	CXCL8	Bos taurus C-X-C motif chemokine ligand 8 (CXCL8), mRNA [NM_173925]	TGTTAAGCTTACCAATGGAAACGAGGTCTGCTTAAACCCCAAGGAAAAGTGGGTGCAGAA///TCTTGCCCTTATTATGCAATGATGTGTTGTATCATGTGAATCTTGAGACTGTCTTTCCTA///AATCCTGCTTTTTTGTTTTCGGTTTTTGTATATCTTGCAACCCTCGCCTGCTGGCCAGGA
A_73_P490328|517432	0.040654	0.00650622	up	2.03142	2.03142	1.02249	IGSF9B	immunoglobulin superfamily member 9B [Source:HGNC Symbol;Acc:HGNC:32326] [ENSBTAT00000018907]	AGCTTGGATGTGTTCGGACAGACGCCTTCCCCTCGAAGGTTGGGGGAGGAGCTGCTCAGA
A_73_110227	0.0192753	0.00198862	up	2.03031	2.03031	1.0217		Rep: Probable sulfate transport system permease protein cysT - Marchantia polymorpha (Liverwort), partial (5%) [TC434357]	TGATGCCTCCTGTTGTGTCTCTAGTTTATCTCTGTCAAAGCTGGTACTAAGCCATTGTGT
A_73_P087561,A_73_110420|282239	0.0432564	0.00719612	up	2.02123	2.02123	1.01524	GABRB1	Bos taurus gamma-aminobutyric acid type A receptor beta1 subunit (GABRB1), mRNA [NM_174544]	GTGGTCCCGAATGTTCTTCCCCATCACCTTTTCTCTTTTTAACGTCGTTTATTGGCTTTA///GAAGGAGTATTCCCTCAAGAGCTCAACACACAATTCTAATCAAATCCAACCAACTACAGT
A_73_104394	0.0011059	9.4343e-06	up	2.02103	2.02103	1.01509		GB	GACTTTCCTCAGCAAACTATCTTTTCAGCGTCTGAGTGGCCCGTGTGGAGGTGGTCAGAA
A_73_112180,A_73_P116206|529036	0.00279859	5.41765e-05	up	2.01545	2.01545	1.0111	LOC529036	Bos taurus transmembrane protein 45A-like (LOC529036), mRNA [NM_001105624]	AATCTTCTGTTCTTGGCCATCTGTTTGACAGCCCTGATTACCTTCATGGAGCTCTTCATA///TTTACCATATACCTCTTCTTTGGGCTGCTGGGTGTGACAAACATCTTATGTTCCACCATC
A_73_P106557	0.0044775	0.000143244	up	2.01418	2.01418	1.01019			TTCTGTGCTCTCTGGAAGCTGCCTGTGGGATTTACCGTGGGATACAATCCACTAATATTT
A_73_119032	0.00463871	0.000154884	up	2.00987	2.00987	1.0071		Rep: UPF0513 membrane protein - Bos taurus (Bovine), partial (55%) [TC431618]	TGTGTGTGGCAGAGTCTCTGTGTGTGTCCAACATACTCCACGCTGTGGAGTCCTCCTGGA
A_73_110428	0.0213164	0.00233486	up	2.00662	2.00662	1.00477		GB	GACTGTGTGAAGAACTGTGTGATGCACGTGGAATTTTTAGGTGCCTGCTGTGACTTTTGT
A_73_P039796|100125578	0.00561574	0.000221284	up	2.00472	2.00472	1.0034	SUGCT	Bos taurus succinyl-CoA:glutarate-CoA transferase (SUGCT), mRNA [NM_001105036]	TGTACCCCACCTTTCATTCCTCACTGTTTTCCCCCAGATAATAGATTAATTGCAGATTTT
A_73_P108756	0.0446257	0.00758527	up	2.00359	2.00359	1.00259			TATGCTGGTAGTAGGTCTGGTTGTTATTATTTACGTGGTGGTTATGGACCGCACGTCGAT
A_73_P386906,A_73_P455056,A_73_P345596,A_73_108605,A_73_P168282|523701	0.00532874	0.000203465	up	1.99892	1.99892	0.999223	NCAN	Bos taurus neurocan (NCAN), mRNA [NM_001193082]	TGGTTTTCCATGTGTGGTGAATTTCATGCACACCCAAACACACACACACAGATGAGAGGA///TAACACATCTCAGTCATCCATGTCACAAAAGAATCTCCCTTTGTTTGGAGTGGTGGGGGA///TCACAGTGGATCCTATGGCTTCCACAGTCACACTGGACACCAGCGATGCTGGTGGGCATT///CAGTGTTCCGTGGGTCTGTGGTATCTGACACTGTGGACATTAATGTACTTCTTGGACATT///TCTTTTCTAAAGTGGGTGGTTTGTCTTTTGGTCTTTCCCTCTGAGGTGTGCATGTGTCTG
A_73_106142,A_73_P338741|539766	0.0124535	0.000959726	up	1.99857	1.99857	0.998969	FGD5	FYVE, RhoGEF and PH domain containing 5 [Source:HGNC Symbol;Acc:HGNC:19117] [ENSBTAT00000016893]	ACGTGTTTTTACATAAGGCAGAGTGGCGGGGGGCTTCCTTGTTACTCTCATCGAAATAAA///ACCTGTTTCTGATGAGTGACGTCCTGCTGTACACGTACCCCCAGAAGGACGGGAAGTACC
A_73_111842|282355	0.00265942	4.92486e-05	up	1.99333	1.99333	0.99518	SLC1A5	Bos taurus solute carrier family 1 member 5 (SLC1A5), mRNA [NM_174601]	ACTCATAACACGTTGTTGTTACTCTGAGGATGTTTATAACAATAAAACTGTCAGTTTGTA
A_73_P039976|505103	0.00241591	4.09518e-05	up	1.99093	1.99093	0.993443	PHGDH	Bos taurus phosphoglycerate dehydrogenase (PHGDH), mRNA [NM_001035017]	TGCTTGTGTCTCCTCTGACTCCTATCTTTCTGTGGTACAGCAATCACCTCCCAATAAAGA
A_73_108815	0.0065302	0.000291741	up	1.99063	1.99063	0.993225			ACAGCAGCCTTTCGGCTTTCCTTAAGGGAGCACTCTTCGACCCTCTCTGTTGATGTGCTC
A_73_P259101,A_73_121310|513154	0.00577663	0.000236447	up	1.98363	1.98363	0.988146	APLP1	Bos taurus amyloid beta precursor like protein 1 (APLP1), mRNA [NM_001038095]	ATGTCCATTCCAAGGGGCTTTCCTTTCCACTCATCGGAGATTCAGAGGGACGAGCTGGCC///TTGGTCCCAGTGTCTGTTGTTCCCTGGAATTCATCCTCCCATGTGTCCTCCACTAATACC
A_73_P107916,A_73_P046956|282293	0.00315543	6.82215e-05	up	1.97702	1.97702	0.983324	OPN1LW	Bos taurus opsin 1 (cone pigments), long-wave-sensitive (OPN1LW), mRNA [NM_174566]	ATGGTGATGATCTTCGCCTACTGTCTCTGCTGGGGGCCCTACACCTTCTTTGCCTGCTTT///TTGCAACTTTTTGGGAAGAAGGTGGACGACAGCTCTGAACTCTCCAGTGTTTCCAAAACA
A_73_105533|782104	0.0116388	0.000852357	up	1.97283	1.97283	0.980269	MYO15A	myosin XVA [Source:HGNC Symbol;Acc:HGNC:7594] [ENSBTAT00000035016]	TAGCTGCCCCTATGTGGAGGTTGCACTTGGGGATGTCACTGCCCAGCACACCGTGCAGCT
A_73_104174,A_73_P441216|282223	0.0297105	0.00397501	up	1.97245	1.97245	0.979987	ENTPD1	Bos taurus ectonucleoside triphosphate diphosphohydrolase 1 (ENTPD1), mRNA [NM_174536]	CCCCTTTCTCTTTTGTACTCTTTGTTTGTGTGGGTCTTAAAGATCTGCCTCCTTTCATGA///AATTGAGTTGGTTTAACCTGAAGCCAAGCAAAGACGACACTCAGGAAACCTATGGAGCTT
A_73_P324666,A_73_113698,A_73_P259316|539524	0.0158389	0.00146059	up	1.97244	1.97244	0.979981	HSPB8	Bos taurus heat shock protein family B (small) member 8 (HSPB8), mRNA [NM_001014955]	TCCCCCTTACTCACCGTTTGGAGAGAGCAGTTTCAACAATGAGCCTCCTCAGGACGGCCA///CTAGTGGTGTTGTGTATATGGGTGGGACGTGCGTGTCATTGTTATTTGAATTGTGCTGTT///ATCTTATCTTGCAGCTAATGCAAGAGTTACTTTTCTCTGGGGACCGGGATTCCCATTCTG
A_73_P490503|786307	0.0278947	0.00361385	up	1.9695	1.9695	0.977831	LCE1B	Bos taurus late cornified envelope 1B (LCE1B), mRNA [NM_001205512]	GGGGGCTCCGGGTGCTGTGGAGGGGGCAGTGGTCAGTCCTATGGAGGCGGCTGCTGCTGA
A_73_121077|517359	0.000562476	1.91875e-06	up	1.96942	1.96942	0.977774	CD19	Bos taurus CD19 molecule (CD19), mRNA [NM_001245998]	TGTGTGTGTGTGTACAAGTGAAACTTCAGCCCCCTTTGCACTCCCCAAATAAACTGTGTA
A_73_116966|520493	0.00685609	0.000317727	up	1.9655	1.9655	0.974899	VSIG8	Bos taurus V-set and immunoglobulin domain containing 8 (VSIG8), mRNA [NM_001205873]	CTACAGCGTGTGTGTGGTGGAGGTGAAGGTCTCAGACACCCGGCGCATAGGAATCATCAT
A_73_117867	0.0158823	0.00146803	up	1.96541	1.96541	0.974832		Rep: Isoform 2 of Q7Z7B0 - Homo sapiens (Human), partial (18%) [TC416446]	TGATCAGGGCAACTCAGATGGTTGCTCTTTTCTGCCCCTGCTATGATTAAGTCCTTTCTT
A_73_P114561	0.0410152	0.00660252	up	1.96501	1.96501	0.974536		Rep: Regulator of G-protein signaling 6 (RGS6) (S914). - Takifugu rubripes, partial (4%) [TC476389]	ACTCGCAGTGTGGTAAGTTCAGCTGGTTTTCTTTGGTTTTTTGGCTTTCTTTCCGTTTTT
A_73_105589|511504	0.00392673	0.000108707	up	1.96488	1.96488	0.974439	CAMK1G	Bos taurus calcium/calmodulin dependent protein kinase IG (CAMK1G), mRNA [NM_001076836]	TGTTTTCTTGTCCTCCGCCCCCTCCGGCTTCCTGCTCTGTGTTGTGCTGAATAAAATGGA
A_73_P083201|541257	0.0112606	0.000810044	up	1.96427	1.96427	0.97399	NR6A1	nuclear receptor subfamily 6 group A member 1 [Source:HGNC Symbol;Acc:HGNC:7985] [ENSBTAT00000052227]	CGTTGCCAGTTGCCTCCACAGCAAGAAGAGTTTTTGTTTGTTTGTCTTGTTTTTTAACCT
A_73_P396381	0.00289799	5.89778e-05	up	1.96315	1.96315	0.973167		immunoglobin superfamily member 21 [Source:HGNC Symbol;Acc:HGNC:28246] [ENSBTAT00000025516]	AACTATTTCCAGTCTTGTTCTTAGTCTCTTTCTGTCCGTGTCTTGGCTCCTTCGGTCAAT
A_73_105642|614200	0.0063234	0.000276453	up	1.962	1.962	0.972322	CNDP1	Bos taurus carnosine dipeptidase 1 (CNDP1), mRNA [NM_001102275]	CCCTTGCTCTTACCATACGTCTTTCTCTTGTTGATAAATGTGTTGGTCTCCTGCATTGAC
A_73_P055595	0.00747387	0.000377546	up	1.96133	1.96133	0.971834		GB	ATCGTTCTTAATAATGCTGTGATGTATTTTGCAGTTGGGCTTTTCGGTGCTGTCCCCCTG
A_73_P068421	0.0278002	0.00359014	up	1.95919	1.95919	0.970259		GB	TCTTCAGAACCACCTTCCTGAGAGAGTTCTGTGTGGGCCGCTGTGTGTCGTCACATCCAG
A_73_P075536	0.000783732	3.943e-06	up	1.95536	1.95536	0.967436			ATATTTGTGTCATCCTGGTCTTCTACGTGCCTGGAATATTCTCCTTCCTCACTCACTGCT
A_73_101602|538688	0.036885	0.00558698	up	1.95103	1.95103	0.964235	LOC538688	BE04010B2A10 Normalized and Subtracted bovine embryonic and extraembryonic tissue Bos taurus cDNA clone BE04010B2A10 5, mRNA sequence [CN436859]	GGGGGCTGTGGATGCCCGAGTGGGCTCCTTGAGGAGGGCTGTGGATTTCTATTGAAATAT
A_73_108634|281747	0.00638613	0.000280464	up	1.95054	1.95054	0.963876	EPYC	Bos taurus epiphycan (EPYC), mRNA [NM_174307]	CCAAGCCTATATGTGCCTACCTCGTTTGCCTATTGGGAGTCTCGTCTGATTTCAGATAAT
A_73_112349	0.00758299	0.000391165	up	1.95017	1.95017	0.963597		Rep: Seizure related 6 homolog (Mouse)-like 2 - Bos taurus (Bovine), complete [TC416552]	CCCTTCCGAACATGGTGTCCCCGTCTTTGCTTCTGGATTTTTGGTTTTGAGCAATAAACA
A_73_118322	0.0144337	0.00124717	up	1.94934	1.94934	0.962984		Rep: Cofactor required for Sp1 transcriptional activation subunit 9 (Transcriptional coactivator CRSP33) (RNA polymerase transcriptional regulation mediator subunit 7 homolog) (hMED7) (Activator-recruited cofactor 34 kDa component) (ARC34). - Canis familiaris, partial (21%) [TC475956]	CTGGAAGTCGTGGTTCGTATGTATCCTTCTAGGCACCTTTCTCCTATCCGTGTTAATAAA
A_73_P159902|517354	0.00159455	1.98026e-05	up	1.9493	1.9493	0.962959	CX3CL1	PREDICTED: Bos taurus chemokine (C-X3-C motif) ligand 1 (CX3CL1), mRNA [XM_595523]	TCCTTTGCAGACAGATGCTGAGAGAGTGCACATGCGGCTCTGGTCCACAGAGAGAGGGAA
A_73_112417	0.0233875	0.0027272	up	1.94602	1.94602	0.960523		Rep: 2-oxoisovalerate dehydrogenase, E1 component, alpha and beta subunit - Salinibacter ruber (strain DSM 13855), partial (3%) [TC410451]	TTCAGTCTGCTCCTTTGTCTGGAAAATGGATGATGTGATCATTAAGGTCCCCTTGGCTCT
A_73_P058581,A_73_105045|282377	0.00695993	0.000326987	up	1.94534	1.94534	0.960023	STX1B	Rep: Syntaxin-1B - Bos taurus (Bovine), complete [TC396760]///Bos taurus syntaxin 1B (STX1B), mRNA [NM_174618]	TCTCTCTATTGGTGACCAAGTTGCAAATGGATAAAATACAGGAAAATTCTGCCCCCCGCC///AAGAAAATCATGATAATCATTTGCTGTGTGGTGCTGGGGGTGGTCTTGGCGTCATCCATT
A_73_101437,A_73_P078436|493644	0.00156059	1.8472e-05	up	1.94293	1.94293	0.958232	CLCN5	PREDICTED: Bos taurus chloride channel, voltage-sensitive 5 (CLCN5), transcript variant X2, mRNA [XM_864613]///chloride voltage-gated channel 5 [Source:HGNC Symbol;Acc:HGNC:2023] [ENSBTAT00000001973]	GAAGGAAAGCCAGAAGGAAAATAGTAATGGTATTTTCCAGACTGTGAATTCAGTTCAAAT///TTCATTCTGCTGGGCATATTTGGTGGTCTGTGGGGAGCTCTTTTTATCCGCACTAACATT
A_73_P068537	0.0466309	0.00810299	up	1.94229	1.94229	0.957759		PREDICTED: Bos taurus vomeronasal type-1 receptor 4-like (LOC107131476), mRNA [XM_015458489]	CATAGGCTTAGGTTACTTGTGGTCCTTCTCAGATGCCATGTTTATTACCCTCATGGTCTG
A_73_P263241,A_73_110520,A_73_108070|618918	0.0150335	0.0013409	up	1.94222	1.94222	0.957707	MLC1	Bos taurus megalencephalic leukoencephalopathy with subcortical cysts 1 (MLC1), mRNA [NM_001076952]	GCTGGACACAGGCACTTCTCCCTTCAGAGAGAGCTCGGAACATTCACACAAGTGGGGTTT///GAATCATGGATGTTTTCAAAGACTACCCACCAGCCTTCAAGCAATCCTATGACGCGCTGC///GCCGGGTTCAAGGTGGAGTCTTCTCGTTTCTGTGGTTTAAGTTTGAAATAGGCAAACGTT
A_73_114332|535881	0.00697792	0.000330379	up	1.94082	1.94082	0.956668	SLC8A2	solute carrier family 8 member A2 [Source:HGNC Symbol;Acc:HGNC:11069] [ENSBTAT00000014410]	GCTCTTTCTGGGCCTATGGTTCCTTTACATCCTCTTCGCCAGCCTAGAGGCTTACTGCCA
A_73_117994	0.00937356	0.000561554	up	1.94025	1.94025	0.956245		Rep: glycine-N-acyltransferase - Bos Taurus, complete [TC396842]	GCTTTGTTGTTGCTCTTGTAGGTGTATGGCACCCTTTTCTGCCGGGAGCCCGCATGAGGA
A_73_118605	0.0154709	0.00140237	up	1.93966	1.93966	0.955807		Rep: Protocadherin gamma subfamily A, 10 - Homo sapiens (Human), partial (94%) [TC439274]	TCATACAGAAGTGTCTTGTCAATTTGTGTGCTCTCCTGGTGGCTACATGCTGAAATCCTT
A_73_101261|615051	0.0104775	0.00069158	up	1.93835	1.93835	0.954832	LOC615051	Rep: Fatty acid desaturase 2 (EC 1.14.19.-) (Delta(6) fatty acid desaturase) (Delta(6) desaturase) - Mus musculus (Mouse), partial (20%) [TC401053]	GCAGCACCTGTACTTCCATGTGTCTTGGGTCCCCTTTCTTATACCAGTATATTTCAACCT
A_73_P110246|508420	0.0219895	0.00245419	up	1.93783	1.93783	0.95444	LOC508420	GB	TTGAGAACTTTGCTTTTGCTTGCTGCATCATCATGCTGTTTCTTCCCTTCTCCATTATCG
A_73_P491173	0.0327796	0.00465973	up	1.92828	1.92828	0.947315		Rep: LOC784904 protein - Bos taurus (Bovine), complete [TC408426]	GGGGGTTGTTGTTTCTGTCTTAGGTGTTTTATGCTAGCTGTGTTGTTGTTTATCTACTAA
A_73_P132196|614588	0.000608137	2.39168e-06	up	1.92646	1.92646	0.945951	DNAJB9	Bos taurus DnaJ heat shock protein family (Hsp40) member B9 (DNAJB9), mRNA [NM_001193039]	TGTGTGTGTGTGGTTTTTCTTCTTTGCACTCATCTTTAGAGATTGACTAATACCTCATTC
A_73_105892	0.00410057	0.00011821	up	1.92546	1.92546	0.9452			TGGTTTTCGGACTCTGCTGGCGCCTGTTCACCTTGTGCTGTTGGTGGACGTTTGGCTGAT
A_73_P039036,A_73_P100786|783935	0.027972	0.003626	up	1.9212	1.9212	0.942011	DEFB5	Bos taurus defensin, beta 5 (DEFB5), mRNA [NM_001130761]	AATGAGGAGTCAGAAACTGCGCCCTTCAACACACCGTCTAAAATTTAAACGAGAATAAAT///AGTAGTAAGAAATCCTCAAAGCTGCCGTTGGAATATGGGTGTCTGTATTCCGATCTCGTG
A_73_111972	0.0385418	0.00601011	up	1.91918	1.91918	0.94049		Rep: Ras-related protein Rab-17 - Homo sapiens (Human), partial (58%) [TC419194]	TATGTGGTTGCTTTCCTCCTGTCTTCTCAGGCCAGAATTTATTATTAAAGCACATTCCTT
A_73_P131446	0.0285721	0.00375551	up	1.91616	1.91616	0.938215		965440 MARC 3BOV Bos taurus cDNA 3', mRNA sequence [CK778283]	ATAGACTTTCTCATCTTCTTGCTCTCCTAAGGAATATGTTACTCCAAAAATCTTCTGTGC
A_73_P486703	0.00352514	8.70854e-05	up	1.91515	1.91515	0.937457			ATTACCCGGGTGCCATTTCAGGGCCAGCTTCCGATATGCTTTCTTGAGCTCCTCCTCGCT
A_73_104162,A_73_P075511|617229	0.000128482	3.37048e-08	up	1.91388	1.91388	0.936502	DNHD1	dynein heavy chain domain 1 [Source:HGNC Symbol;Acc:HGNC:26532] [ENSBTAT00000012193]///dynein heavy chain domain 1 [Source:HGNC Symbol;Acc:HGNC:26532] [ENSBTAT00000019733]	GTCATTCCAGTATGAGAAAAGCCAGGCCTCAGAGTTCCTGCTCAGCAAGCGGCATGCCAT///AGTTCCAGAGATGGGGCTGCTGCTGATTGGACTACAGCTTCACAATGCCAAGTGGGACCC
A_73_113042	0.00651307	0.000290039	up	1.91045	1.91045	0.933914		Rep: cDNA FLJ77790 - Homo sapiens (Human), partial (31%) [TC449732]	TACTGGGGGTGGTGGCGATGGGTGCTGTGACGTGTGTCACCTCCAGCTGTGCAGAGAACA
A_73_120139	0.0431275	0.00715813	up	1.90784	1.90784	0.931938		Rep: SLC5A9 protein (Solute carrier family 5 (Sodium/glucose cotransporter), member 9, isoform CRA_a) - Homo sapiens (Human), partial (9%) [TC450987]	TCATCCATTTCCAGCCGGAACCTCCCCAGGGCTTTATACTCTCATTGGCAGCTCTGCAGT
A_73_P358101,A_73_101807|539920	0.00308217	6.54328e-05	up	1.90718	1.90718	0.931441	LY6G6F	Bos taurus lymphocyte antigen 6 family member G6F (LY6G6F), mRNA [NM_001076194]	ATCCCAGTTCTCTGCGAGGGCTGCAGATGGATCTTCCTGCTCTGTCCTCCTGTGTTCTGT///TGTATATGAGTGTATGTGTGTGTGTTAAGGGGCTGGGGGCTGAAGGAAAGAAGAAGCATT
A_73_P168187	0.00625122	0.000269919	up	1.9056	1.9056	0.930243		PREDICTED: Bos taurus naked cuticle homolog 2 (Drosophila) (NKD2), mRNA [XM_001256156]	TTTGTGCTGCTGGTTTTGTATTTCCTCCTTGGCACTGTTTTTACGGATAAAGCAACTTGG
A_73_P379991,A_73_100253|618258	0.00367589	9.52497e-05	up	1.90402	1.90402	0.929048	DPEP3	dipeptidase 3 [Source:HGNC Symbol;Acc:HGNC:23029] [ENSBTAT00000023962]	TTTCAGACTCGGCCAGACCAACCTAGACAAGCTCAGGGATGGCTTCGTGGGTGCACAGTT///AGAGGCCCCCAAAAGCCTCCCTACAACTCGTTTTAGGCCTTGTGGCTGCTGTCACCTTCT
A_73_112687	0.00979339	0.000609516	up	1.90309	1.90309	0.928347		Rep: MGC151861 protein - Bos taurus (Bovine), complete [TC446933]	CTGGGAGTGAGTGTCCTCCTGTGTTACTACTTGAGCCCACTCACTCATTCAAAAAACATT
A_73_110680	0.00254544	4.50029e-05	up	1.90086	1.90086	0.926654		Rep: cDNA FLJ77965 - Homo sapiens (Human), partial (20%) [TC444178]	AGGAGGTTCCCAGCTAGACTCTTCAGCCAAATGCCTGAGCTTAGTCCCCTGCCTGTCACT
A_73_106558|505490	0.00236128	3.89546e-05	up	1.89905	1.89905	0.925278	TMEM40	transmembrane protein 40 [Source:HGNC Symbol;Acc:HGNC:25620] [ENSBTAT00000066256]	AGTTTTTCCATTTCATCCTCCTCTGCTTTGCCATTGGGGCCTTGCTGGTGTGTTATCATT
A_73_110179	0.0170157	0.00164699	up	1.89454	1.89454	0.921846		Rep: Penicillin-binding protein, transpeptidase - Stigmatella aurantiaca DW4/3-1, partial (5%) [TC425713]	AAACAAAACGAAAAACCCCTGAGGATCTCACGTTTTATTAAAAGAAGTGAAGATTGCTGT
A_73_105949,A_73_P122746|616955	0.00475712	0.000166589	up	1.89323	1.89323	0.92085	NRGN	Bos taurus neurogranin (protein kinase C substrate, RC3) (NRGN), mRNA [NM_001113313]	TAAGGCCGTGCCCTTTTAGTTAGCTCTCCAGTCTCGTATGGTCCCCGTTCGCCCTTCCTC///TCCAGGCGAGTTTCCGGGGCCACATGGCAAGGAAGAAGATAAAGAGCGGAGAGCGTGGCC
A_73_111682|504216	0.00319653	7.0912e-05	up	1.89321	1.89321	0.920837	NPY	Bos taurus neuropeptide Y (NPY), mRNA [NM_001014845]	CTATGTGGTGATGGGAAATGAAACTTGCTCTCCAGTCTCTGCCTCTTTTTCAGCCCCCAT
A_73_113962|540657	0.0408888	0.00657125	up	1.88873	1.88873	0.917418	GABRB2	Bos taurus gamma-aminobutyric acid (GABA) A receptor, beta 2 (GABRB2), mRNA [NM_001192760]	CTTGACTGATGTGAATGCCATAGATCGGTGGTCCCGCATATTCTTCCCAGTGGTTTTCTC
A_73_P054710	0.0249457	0.00304152	up	1.888	1.888	0.916857		GB	TGTGACATGGTGATGTATTTTGCAGGAGTGCTGATCGTTGTTGGTTCCTCCGTGTGTATT
A_73_P067056,A_73_115511|529961	0.00107487	8.56957e-06	up	1.88704	1.88704	0.916123	ADGRG3	adhesion G protein-coupled receptor G3 [Source:HGNC Symbol;Acc:HGNC:13728] [ENSBTAT00000008168]///adhesion G protein-coupled receptor G3 [Source:HGNC Symbol;Acc:HGNC:13728] [ENSBTAT00000064892]	CTTGTCATCAAGGTCTTTAACACCTACTTCAGCCACTACTTTCTGAAGCTGAGCCTTATG///CCTCTCTGCAAGGTGTCTTCATCTTCTGCTGGTTCATTGTCCTCTACTGCCCAAGCCAGA
A_73_119750|618154	0.00883994	0.000504609	up	1.88206	1.88206	0.91231	MEX3A	Bos taurus mex-3 RNA binding family member A (MEX3A), mRNA [NM_001206290]	GAGTGTGCAGTACGCATCTGTGAGAGGACGGATCCGGAGTGTCCCGTCTGCCACATCACA
A_73_119360|615553	0.00625122	0.000270464	up	1.87601	1.87601	0.90767	RMI2	Bos taurus RecQ mediated genome instability 2 (RMI2), mRNA [NM_001099720]	GGGTCAGGTCTTGTTCCCCATTGCTGTAAACTTTTGCTGGAGTTGATTTCTACCACCAAT
A_73_P439891,A_73_111456,A_73_P285186|505552	0.0320585	0.00448943	up	1.87598	1.87598	0.907644	MYT1	Bos taurus myelin transcription factor 1 (MYT1), mRNA [NM_001192062]	TTTGTCTGGGTGTCCCATTGCTGCTGCCGAAAAATTAGCCAAATCTCATGAGAAGCAACA///ACATGTACTCCAACCAGGAGTGCTACCAGAACCCCGAGAACAAGGACCTCCTCGAGAGCA///AGAAGTTCTCCAAGGTCACCTTTGACTACGCAAGTTTTGATGCTCAGGTTTGTGGTAAGC
A_73_100620|541211	0.00859651	0.000481245	up	1.87476	1.87476	0.906703	DIXDC1	DIX domain containing 1 [Source:HGNC Symbol;Acc:HGNC:23695] [ENSBTAT00000040095]	ACTGTCAAGGAAGAGGTTTTCCACGATGATGATGCCATTCCTGGATGGGAAGGGAAAATT
A_73_P079500|783998	0.00477417	0.000168436	up	1.87346	1.87346	0.905707	LOC783998	GB	AGAGTCCCTGTAATAGAGTTAACTAGCTCCACCTTAAGTTCTCTCCTCTTATTTATCCCC
A_73_P117871,A_73_P468363,A_73_P432926,A_73_P034286|515452	0.000972362	6.68184e-06	up	1.87289	1.87289	0.905269	UQCC3	Bos taurus ubiquinol-cytochrome c reductase complex assembly factor 3 (UQCC3), mRNA [NM_001075714]	CAAAACACAAGTCAGATCTGTGGTTTGTGTGAGTGGATAACCAAATGATGTTCTTGAAAT///TGCAGGAAGCAGCGGCCACGCAAGAGAACGTCGCCTGGAGAAAGAACTGGATGAGTGGCG///TACGTTTTAACGTCCACATCGCGGGCTGTGGCTAACTGAAGGAACCAATAAATCATGTTC///ATGATGTTCTTGAAATTATAAGTAGCCTGGAAACTCTTGTGCAATAAACACCCATAGAGG
A_73_P044536|531995	0.00333261	7.88581e-05	up	1.87275	1.87275	0.905155	SP7	Bos taurus Sp7 transcription factor (SP7), mRNA [NM_001102142]	GACTTTGGATCCTCCTTTTCTATTTCTTGCTCCCTCAAGGCCCCAAGTTAAAGGGTTAAA
A_73_P131917	0.0157728	0.00145099	up	1.87221	1.87221	0.904741		Hw_FAT_15_050513_D10 Bos taurus CF-24-HW fat cDNA library Bos taurus cDNA, mRNA sequence [DV779133]	CCCAAAACCCATTTGTGTTTATATTGGGCCCGTGTTTTTCTTTCTCCCCCCAATATAGAA
A_73_P065866|281222	0.0105145	0.000700563	up	1.8721	1.8721	0.90466	HCRT	Bos taurus hypocretin neuropeptide precursor (HCRT), mRNA [NM_001166520]	TTCCTCTACAAAGGTCTCCTGGGCCACCGTGACGCTGCTGCTCCTGCTACTGTTGCTGCC
A_73_P204827	0.000707756	2.99965e-06	up	1.87117	1.87117	0.903942		chromosome 17 open reading frame 47 [Source:HGNC Symbol;Acc:HGNC:26844] [ENSBTAT00000066185]	ATGTCTCTGAGGAAATGTACAATCGTGTCTTCTGGTGGCTAAAAGGTCTGTGCTTTCCCT
A_73_P108906,A_73_111882|281584	0.0109239	0.00076343	up	1.86982	1.86982	0.9029	ABCA4	Bos taurus ATP binding cassette subfamily A member 4 (ABCA4), mRNA [NM_174221]	TCTCCTGGGTGTGAACGGAGCTGGCAAAACCACCACATTCAAGATGCTCACTGGGGACAC///GTGGCCTCCATACTGCTCTCATTTCAAGTGGATCTGCTTTTTGTGTGTGTGTACGTATGT
A_73_P409606,A_73_P041301|514209	0.0349495	0.00514847	up	1.86911	1.86911	0.90235	ASNS	Bos taurus asparagine synthetase (glutamine-hydrolyzing) (ASNS), mRNA [NM_001075653]	TTTGACAATGCCGTTAAGAAACGTTTGATGACCGACAGAAAGATTGGCTGCCTTTTATCA///TAGGATTTTACAGGACTATATTGAACATCAGGTTGATGATGCAGCGATGGCAAGCGCAGC
A_73_114564,A_73_P046186|538050	0.00484913	0.000174104	up	1.8671	1.8671	0.900803	RAB7B	Bos taurus RAB7B, member RAS oncogene family (RAB7B), mRNA [NM_001078013]	TAACTGACCTGGAGTCCTTCGAAGCCCTGGAAACCTGGCGGGGTGATGTTCTGGCCAAAA///TTCAGTGGGCGTAGGGACCATTCTAAAAGTGCACAACAGATAATAAATGTCTTTCTTAGT
A_73_P192862	0.0347696	0.00510772	up	1.86406	1.86406	0.898447			TTCTCCCTGTGGTCCTTATCGTCCATACATCCCAAATACTAGGAAGCTGAAGAAGACAGT
A_73_P128386	0.0114429	0.000828837	up	1.86356	1.86356	0.898065		LB0181.CR_J24 GC_BGC-18 Bos taurus cDNA clone IMAGE:8357978, mRNA sequence [DV905987]	TAAAGAAAACTGGAGTTAGGCCCCCAATGTGTTCCCTCTCCCTAGCATTTTACTTAATGT
A_73_P045136,A_73_P108951,A_73_P075166|281301	0.000252147	1.80546e-07	up	1.86295	1.86295	0.89759	MCAM	Bos taurus melanoma cell adhesion molecule (MCAM), mRNA [NM_001110062]///melanoma cell adhesion molecule [Source:HGNC Symbol;Acc:HGNC:6934] [ENSBTAT00000047009]	CTGCGTGTATGTGTGTGTGCGTGTGTGTATATATACAGTTTTGTTAGGTTGTAAATTTGC///TAAAGTTATATTAGCACCAGGGTTCCTAATGGGAGAATGGTACTTGGAGATGAGAAATGG///AATTTGTAGTTGAAGTTAAGTCAGATAAGCTCCCAGAAGAGATGGGCCTCCTTCAGGGCA
A_73_108980,A_73_P272996|507783	0.000437152	9.65526e-07	up	1.86196	1.86196	0.896824	PTH1R	Bos taurus parathyroid hormone 1 receptor (PTH1R), mRNA [NM_001075332]	TTTCTGCAATGGCGAGGTACAGGCTGAGATCAAGAAATCCTGGAGCCGCTGGACACTGGC///CTGCTCAAATCCACACTGGTGCTCATGCCGCTCTTTGGCGTCCACTACATCGTCTTCATG
A_73_102141|512578	0.0103091	0.000671132	up	1.861	1.861	0.896081	KCTD15	Bos taurus potassium channel tetramerization domain containing 15 (KCTD15), mRNA [NM_001075568]	AGATGCTGATGTACAATTGTCGTGTGTTTGTGTAAACACATTATGTTCCTAGTTCATGCC
A_73_110558|786165	0.0189155	0.00192212	up	1.86014	1.86014	0.895412	FMN1	PREDICTED: Bos taurus formin 1 (FMN1), mRNA [XM_015465018]	GAAGCCGCTCTTGATGACTCTCTTTCTGGAAGGAGCCGTGCTTTCTCTGGGTCCCTCTCT
A_73_103097|535623	0.0432616	0.00721661	up	1.85716	1.85716	0.893098	RHBDL3	rhomboid like 3 [Source:HGNC Symbol;Acc:HGNC:16502] [ENSBTAT00000027954]	CAGTCGCTGTGGTGGATTTTTGTGGCCATGTACACCGTCTTCGTGCTGTTCGCTGTCTTC
A_73_119425	0.000365378	5.66648e-07	up	1.85516	1.85516	0.891543		PREDICTED: Bos taurus ArfGAP with GTPase domain, ankyrin repeat and PH domain 3 (AGAP3), mRNA [XM_868297]	TATGTTTGTGTACATACTGGTGTGTGTGTGTGTGATGAGCCAATAAACCAAACCGTGTGT
A_73_P062331	0.0207789	0.00224359	up	1.85094	1.85094	0.888261			AGAATTTTCCCTTTCCTGTGGCTTAACTACATGAGATCCAGACTTTCGCTGAGACCCTGA
A_73_P096706|101901911	0.0104978	0.000697756	up	1.84467	1.84467	0.883363	LOC101901911	PREDICTED: Bos taurus P2Y purinoceptor 2-like (LOC101901911), mRNA [XM_015462109]	GGATCACTTTGACAAGTTTTTCGTCTACAGCATGGTCCTGATGTTGTCCAGCTTTGTCCT
A_73_P162727	0.0337206	0.00489006	up	1.84448	1.84448	0.883214			GTGTGTGTTGTCTTTGAAAGTCTGCTTGAACAGGCATCACTTCCATTCATGCTGATTGCT
A_73_102314	0.00118667	1.06932e-05	up	1.84423	1.84423	0.883016		Rep: Baculoviral IAP repeat-containing protein 5 - Bos taurus (Bovine), complete [TC455727]	TGTGTGTGTGTGGAACAGGATTTTCATGTAAAGAGGAATTGGGACAAAGCCCTCAGCCAA
A_73_106204|508687	0.0417176	0.00679465	up	1.84152	1.84152	0.880897	LOC508687	GB	GGGCTAGGACCAAGGAAATTCGGAGTCGACTTCCAAGACTGCCTCACTTGTGGAGGGTCT
A_73_P108106,A_73_P045026|282201	0.00110391	9.23059e-06	up	1.83924	1.83924	0.879112	CRABP1	Bos taurus cellular retinoic acid binding protein 1 (CRABP1), mRNA [NM_181028]	ATCCTGACGTTCGGCGCCGATGACGTGGTCTGCACGAGGATTTATGTTCGGGAATGAAGG///GATGTCCCCCCAGTAATGCTGTAGTGTTTTCCCCAAGGCTTTGTGCCTCTGTCTCCCTGG
A_73_114195|531199	0.0104775	0.000692101	up	1.83685	1.83685	0.877232	PLIN5	Bos taurus perilipin 5 (PLIN5), mRNA [NM_001101136]	TTTTCTATCTCGGACTGAGGGGTCCTCAGCTGGACTTGCTGCCCCCACTTGCTTAGCCAT
A_73_115878	0.0347348	0.00509948	up	1.83351	1.83351	0.874611			TAAGGTCCTGAACATAGTCCCATGTTCTTTGCTGTTTGTTGTTCCACCTTTGCTCTTACA
A_73_P116366	0.00303608	6.36218e-05	up	1.83351	1.83351	0.874605		LB02713.CR_P13 GC_BGC-27 Bos taurus cDNA clone IMAGE:8310783, mRNA sequence [DV889511]	GTTTTCTGTTTTTGCTTTTATAGGATGCTAAGCAGGAGCATTTGTGTGTGTGTGAAAACT
A_73_P491438	0.00050157	1.45062e-06	up	1.83333	1.83333	0.874464		Rep: Ferritin heavy chain - Trichosurus vulpecula (Brush-tailed possum), partial (67%) [TC440418]	AGAAGGCGGTCTGGCAGAGTACGCTTTTGACAAGCTCACCCTGGACACCAGTGACAAGGA
A_73_P493168	0.0481658	0.00851868	up	1.83209	1.83209	0.873491		GB	GTCCATCTGGACAAGGTCCTTAATATTTTTATCTTTCCTTGGCCTTGGGTCCTGCCGTAA
A_73_P162922	0.000476705	1.28209e-06	up	1.83115	1.83115	0.872751		Hw-loin_39_E01 Bos taurus CF-24-HW loin cDNA library Bos taurus cDNA, mRNA sequence [DV794661]	GGAAAAAATATATTTTACCCATTTTCCACAGAAACTTGGGCCCCCCTCTCTAACTTTTTT
A_73_117759	0.000855967	4.81194e-06	up	1.83105	1.83105	0.872672		Rep: Transmembrane protein 104 homolog - Drosophila melanogaster (Fruit fly), partial (5%) [TC406256]	ACCTTCTGGGTGGGCTTTGTGCTGCTCTGGGCTTTCTCCTGCTTCTTCTTTGTCACCGCC
A_73_P119941	0.0311687	0.0042915	up	1.82975	1.82975	0.871647		Rep: Isoform 2 of Q9BQG0 - Homo sapiens (Human), partial (22%) [TC412437]	TTCCAGGTTAGTTGAGGACACAGCTTCTTGGAGCCACTGCCACTCAGCAGTCCCAGACCA
A_73_P489323,A_73_P105371|783509	0.00419338	0.000125507	up	1.82966	1.82966	0.871572	LOC783509	Rep: Sodium- and chloride-dependent creatine transporter 1 - Rattus norvegicus (Rat), partial (3%) [TC414461]	TCCATCGTCTTCTGTCTGGAGCAGCTTTCCCTGGTGATTCGGTCCTTGCAGCACTTTGGG///GTCTACATAGTTGTTTGGTGATTGTTAACTGCGGAAAATAAAACTGAGCTTTTGTGCAAA
A_73_P358971	0.0277525	0.00357847	up	1.82943	1.82943	0.871398		cartilage intermediate layer protein [Source:HGNC Symbol;Acc:HGNC:1980] [ENSBTAT00000003651]	ATGCTGAGTGTGACGCATGCATGTGTCAAGACTTCGTGCTGTATGGGGCTGTCTCCCTCC
A_73_112963	0.00123443	1.25847e-05	up	1.82923	1.82923	0.871239		LB02629.CR_D21 GC_BGC-26 Bos taurus cDNA clone IMAGE:8220647, mRNA sequence [DV884013]	TGAGGGTTCTAGCCTCTTATGGGGTCAGGGTTGCACCTCTCAGGCTCCTGCTCTACTGTA
A_73_P044516|513043	0.00929598	0.000555132	up	1.82896	1.82896	0.871026	NXT2	Bos taurus nuclear transport factor 2 like export factor 2 (NXT2), mRNA [NM_001100353]	GCTGGAACTACTCTTATATGGACTAGACTGTATTTTTGACATGCGCATATTTTTGTAACT
A_73_P066211|509801	0.0155054	0.00141046	up	1.82846	1.82846	0.870629	CD79B	CD79b molecule [Source:HGNC Symbol;Acc:HGNC:1699] [ENSBTAT00000061488]	ATCATGATCCAGACCTTGCTTATCATTCTGTTCATCATTGTGCCCATCTTCCTGCTGCTG
A_73_P075686|788295	0.00200364	3.04032e-05	up	1.82736	1.82736	0.869759	OR52D1	PREDICTED: Bos taurus olfactory receptor, family 52, subfamily D, member 1 (OR52D1), mRNA [XM_001255397]	GGGTCTGGATTCTATTCTTATTTCTGTCTCCTATGGCTTCATCCTCCATGCTGTCTTTCA
A_73_P081126	0.0485104	0.00861667	up	1.82139	1.82139	0.865041		PREDICTED: Bos taurus uncharacterized LOC100336222 (LOC100336222), mRNA [XM_002705145]	TTAAGGCCATTGCCTGCGCCTTCTCACAGTTTTTGGTTGGTGCTTTTCTCATTATTACGG
A_73_108973,A_73_P075521|507282	0.025064	0.0030709	up	1.82126	1.82126	0.864934	OR52B2	olfactory receptor family 52 subfamily B member 2 [Source:HGNC Symbol;Acc:HGNC:15207] [ENSBTAT00000028770]	GCAGATCCAGGACGGGGTAGTCCACCGGTTCTTTGGTATTATGGCTTGGTGCTCTGCTTC///GACATAACATACCTCGACATGTCCATATCCTGTTAGCCAATCTTTATGTGGTGGTGCCAC
A_73_109082|514979	0.0375369	0.00574018	up	1.82088	1.82088	0.864633	CLEC6A	Bos taurus C-type lectin domain family 6 member A (CLEC6A), mRNA [NM_001034479]	AGGTCATGGGGATATTCCGATGCCTTTCTCTCTTCAGTTCGTCCTCTTCTATTAACCTCT
A_73_P076806|785899	0.0251516	0.00308561	up	1.82062	1.82062	0.864432	LOC785899	Rep: olfactory receptor Olr329 - Rattus norvegicus, partial (96%) [TC400366]	CAGGTATGTTTGTCTATTTGAGTTCCAGCTCTGGTGGTTCCTCCACCTTTGACAGATTTG
A_73_107956	0.0130196	0.00103451	up	1.82035	1.82035	0.864217		708142 MARC 6BOV Bos taurus cDNA 5', mRNA sequence [CB453187]	TTGTGATGGAGTCACTTCTGTTTTTATCTGCCCCTTCATCCTCCTGTTTCCTCAGCATTA
A_73_109276|787633	0.0374129	0.00571376	up	1.82017	1.82017	0.864076	HES5	Bos taurus hes family bHLH transcription factor 5 (HES5), mRNA [NM_001105467]	TCACAGTGGGCTGCGTGGGGCGGGTGGGGGTCTCCGCCATGATCCTTAAAGGATTTCTGT
A_73_P393431,A_73_P164982,A_73_115055|508601	3.10471e-05	3.55637e-09	up	1.81949	1.81949	0.863536	CETN2	Bos taurus centrin 2 (CETN2), mRNA [NM_001038515]	GTGTGAAGCCTGGTTTTTGAAAATGTAAATTATTTTTCCCCACTGACATCTCAGTATAAC///AGAAGAAATCCTGAAAGCCTTCAAGCTCTTTGATGATGATGAGACTGGGAAGATATCGTT///AGTGAACTCTTACTTGCATTTGGATGTGTGTGTGTGTGTGTATGGGCTATTTGTTTTATT
A_73_P336171	0.000309176	3.61752e-07	up	1.81934	1.81934	0.863413		PREDICTED: Bos taurus ArfGAP with GTPase domain, ankyrin repeat and PH domain 3 (AGAP3), mRNA [XM_868297]	ATGTTTGTGTACATACTGGTGTGTGTGTGTGTGATGAGCCAATAAACCAGACCGTGTGTG
A_73_P044296,A_73_120451|539159	0.0356913	0.00532031	up	1.81904	1.81904	0.86318	CTH	Bos taurus cystathionine gamma-lyase (CTH), mRNA [NM_001024567]	CTACTGGATGATCTAGATCAAGCTTTGAAGGCAGCTAACCCTCCAAATGCAAGTTCCAAC///CAGGTCAATTCTGTTCAGATCTTTTTATTAATTTTGATATACATGTGCCTCTGAAGGAGG
A_73_P081366,A_73_111352,A_73_P379786|541106	0.0153689	0.0013849	up	1.81852	1.81852	0.862761	RRAGD	Bos taurus Ras-related GTP binding D (RRAGD), mRNA [NM_001192828]	GTTTGTTGTAAAAAACTCAAGAAGAAGAAGGAGATTGGGACATATGACATACGTTTGTTG///CATTACACAAATGTAAACTTTTATGGTCTGTAGTCAGAAAAAATCCTGTGTTCGTACTGC///TTGCTTCCGGAAGGCCATCCATGAAGTTTTTGAGGTGAGAATGAAAGTAGTGAAATCGCG
A_73_104613,A_73_P381176|508271	0.033554	0.0048531	up	1.81792	1.81792	0.862288	DSN1	Bos taurus DSN1 homolog, MIS12 kinetochore complex component (DSN1), mRNA [NM_001100323]	GAAGTGAACAGTAGCGTGGAGTTATACCTCAGTGTTAACAGCCAATAAAACAGCAACTAA///ATAAATCGTCTGCCTCCCTGAAGAGGACTGAACGTGTTTCAAAGGAACGAATTCACCTTG
A_73_P149311	0.00937356	0.000560974	up	1.81662	1.81662	0.861254		myosin XVIIIB [Source:HGNC Symbol;Acc:HGNC:18150] [ENSBTAT00000000932]	AGCTCCTGCGAGTCCCTCTTGGAGTCGGGGCCCAGCTCGCGGAGGACGCCCAGCTCCCCA
A_73_P101696,A_73_P032436|280713	0.0220381	0.00247224	up	1.81543	1.81543	0.860311	ADM	Bos taurus adrenomedullin (ADM), mRNA [NM_173888]	AAATGGAATAAGTGGGCTCTAAGTCGTGGAAAAAGAGAACTTCGCGAGTCCAGTAGCTAC///AGTTGCCTCTTGTGGAAGAAGAAAACACCGTGTCTGTATAATCTATTTACATAAAGTGGG
A_73_P211143	0.0018818	2.65852e-05	up	1.8147	1.8147	0.859734			GCCTCTCTTTTTCCCCTCCTTGCATGTGTTTTGTTTTTAATGCGACTCAGAAGCATTTTA
A_73_P119461	0.0182146	0.00181242	up	1.81469	1.81469	0.859725			AAGGAAAAGGTCAGTTGCCCCAGCTTTTTGACTTGAGGTGAGCCAGTAACTCTTTTATGG
A_73_P085005|788323	0.0155054	0.00141094	up	1.81426	1.81426	0.859379	LOC788323	GB	TTATTCTATTCTCATGAGCCATAGAGTGTGTCACATCTTGGTGTCTGGCTGCTGGTTCCT
A_73_P345441,A_73_106151,A_73_P457391|540576	0.00425387	0.000130471	up	1.81414	1.81414	0.859289	MAG	Bos taurus myelin associated glycoprotein (MAG), mRNA [NM_001040570]	TCGTGGAGATAAACTCCACAGTGGAGGCCATCGAGGGCTCCCACGTCAGCCTGTTCTGCG///CGGTCGTGTTCAGCAGCGACTTCCGCATCTCCGGGGCGCCGGAGAAATATGAGAGTGAGA///TTTAACCTCATCTGTCTGGAGGGGAGCTCTGTCTGTCCATGTTATTTATTGCTACCCCTT
A_73_P081881|617303	0.00168332	2.14031e-05	up	1.80852	1.80852	0.85481	GPR31	G protein-coupled receptor 31 [Source:HGNC Symbol;Acc:HGNC:4486] [ENSBTAT00000019274]	TGACCGGCAGCCTCACCTACCTGCAGGGCGTGCTGAATCCCGTGGTCTACTGCTTCTCTA
A_73_106156|506661	0.00711797	0.000344272	up	1.80808	1.80808	0.854457	GPR6	Bos taurus G protein-coupled receptor 6 (GPR6), mRNA [NM_001100307]	CCCTGTGGCTCCTGTTTTGTGGCTGTTTCCAGTCCAAAGTGCCCTTCCGCTCCAGGTCCC
A_73_P070621|785125	0.0164636	0.00155632	up	1.80731	1.80731	0.853842	ZNF140	zinc finger protein 140 [Source:HGNC Symbol;Acc:HGNC:12925] [ENSBTAT00000052977]	GAGAACCCCTATGAATATGAAAATTCATTTAATTACCACTCATTCCTTACTGAACACCAG
A_73_108308|540732	0.00261305	4.73922e-05	up	1.80542	1.80542	0.852336	ACER2	Bos taurus alkaline ceramidase 2 (ACER2), mRNA [NM_001192775]	GCAGGTTCAAGGTGGTGGTCTGTGTCCTGTCTGCAGTTACAACGTGCCTGGCGTTTGTCA
A_73_P388456,A_73_P063956,A_73_112121|618684	0.0349495	0.00515102	up	1.80435	1.80435	0.851482	MBP	Bos taurus myelin basic protein (MBP), mRNA [NM_001206674]	TCTTAATACAACTGCCTCGACGCTAACCATTGTCTAAATTCCCAAGTGCAGCAGGCATTC///TGAATATTTCGCGTGGGTTTACTATAATGTCTATTAATACATAGCCTCAATGATGAGAGG///TGGCATCCTCGACTCCCTCGGCCGCTTCTTTGGCTCGGACAGGGGTGCGCCCAAGCGGGG
A_73_118979,A_73_P107966|282202	0.00112623	9.81019e-06	up	1.80195	1.80195	0.849556	CRYBA1	Bos taurus crystallin beta A1 (CRYBA1), mRNA [NM_174523]	AGTGGATTAAAAGCTCCAAGTAAGAATTCCTCAAGCATGAGACCTTCCTAAACAATCTAG///ATGTCCTTCCGCCCCATCTGTTCAGCTAATCATAAGGAGTCTAAGATTACAATTTTTGAG
A_73_115142,A_73_P086909,A_73_P203982|541068	0.0010417	8.14771e-06	up	1.80035	1.80035	0.848277	SPIN1	Bos taurus spindlin 1 (SPIN1), mRNA [NM_001192821]	ACAATCTCTGCCAGCAGAACTGGTTTTGTTCTGAATCGTACAGATTTATGTGAACACAAA///GATTATAAAGAAGGCGACCTTCGCATTATGCCCGATTCTAATGATTCACCTCCAGCAGAA///TTTCTCATTGACCTGCTATAGTATTATTGTGTCGTGTGTGTGCGTGTGTGATGTCTGGCT
A_73_107799|534781	0.0132668	0.00106641	up	1.79966	1.79966	0.847723	PBK	Bos taurus PDZ binding kinase (PBK), mRNA [NM_001102178]	GACATGTCAGTTACCTGAAGGTGTATTATCCTATTTTGTACTCCATTGTATTGAGTCTTG
A_73_P203857,A_73_P051761|613406	0.0349282	0.00513853	up	1.79941	1.79941	0.847522	SPATA9	Bos taurus spermatogenesis associated 9 (SPATA9), mRNA [NM_001034736]	CCAAACTTCCTGCTAACAAGTTGAGTAATAAGATTCAGGTTTTACATTCTGTGTTTGATC///CGGGGGAGGGACTATTGCTAAAATGTCATTCTCAAGTATTTATATGGTAGAGAAAATAAA
A_73_106933|617971	0.0337112	0.00488742	up	1.79828	1.79828	0.846619	LOC617971	lysine demethylase 4D [Source:HGNC Symbol;Acc:HGNC:25498] [ENSBTAT00000002234]	AAAGGCACTCAAGAGCTGACTGCCCCCATCGGAGCTAAGAGGGGCCTTGCCTTAGACCGC
A_73_P224277	0.00714711	0.000346734	up	1.79613	1.79613	0.84489			CTCCTCTTCCTCTGGTAGAATTTGCTCCTGGATTCTGTGGTTCATTCTTTGGCAACTTTT
A_73_121358	0.00896795	0.000518604	up	1.79368	1.79368	0.842924		Rep: Predicted protein - Neurospora crassa, partial (9%) [TC472894]	TCTTCACTTTGGGCATTTCCTGAAACCTCCCCCAGCATGACTGCGACTCCAGACCTTGGA
A_73_P054535	0.0322828	0.00454227	up	1.7926	1.7926	0.84205		PREDICTED: Bos taurus olfactory receptor, family 7, subfamily G, member 3-like (LOC528224), mRNA [XM_606637]	ACCCTGATATATTTTGTGGCTAGCTTATTTGCTGGTGTTCCTCTTTTTGGAATCATTTTC
A_73_105672	0.0332181	0.00476391	up	1.79255	1.79255	0.842016		Rep: Calcium/calmodulin-dependent protein kinase kinase 1 - Homo sapiens (Human), partial (5%) [TC440668]	CTATGAGTGTGTATGAGCGTGTCCTCCTGCATGCATGTTCTGACCTCTGAGGTCCCTCTG
A_73_P089421|107132447	0.00706171	0.000337561	up	1.79183	1.79183	0.841437	LOC107132447	Rep: Transient receptor potential cation channel subfamily V member 6 (TrpV6) (Epithelial calcium channel 2) (ECaC2) (Calcium transport protein 1) (CaT1). - Rattus norvegicus, partial (67%) [TC398946]	TTGTTTTAACCCCTTTCCTGAGCCCTTTCATCTTCACTCTCCGGAATGACAAAGTCAAAG
A_73_118355|510584	0.011837	0.00087998	up	1.79143	1.79143	0.841113	OR52W1	olfactory receptor family 52 subfamily W member 1 [Source:HGNC Symbol;Acc:HGNC:15239] [ENSBTAT00000011709]	CCTTAACCCTCTCATCTATGGGGCCCGCACGAAGCAGATTAGGGACCGGCTCCTAGAAAT
A_73_100395|535742	0.0191173	0.00195991	up	1.79021	1.79021	0.840129	SRC	Bos taurus SRC proto-oncogene, non-receptor tyrosine kinase (SRC), mRNA [NM_001110804]	TCCGGAAGCTGCCCTCTATGGCCGGTTCACCATCAAATCAGACGTGTGGTCCTTTGGGAT
A_73_107137	0.00125785	1.29194e-05	up	1.78971	1.78971	0.839726		4079280 BARC 9BOV Bos taurus cDNA clone 9BOV14_A01 5', mRNA sequence [CK964716]	GTCCTGCCTTGACGAGCACCGTGTTAAAACCTCCTCATATTGTGATGATTGGGCATTAAA
A_73_P063736	0.0193307	0.00199802	up	1.78919	1.78919	0.839303		receptor transporter protein 3 [Source:HGNC Symbol;Acc:HGNC:15572] [ENSBTAT00000024988]	CATTGGTTGCTGCTGTTTCATCCTCACTTTAATTGTAATTATAATCATCATCGTAGCTGT
A_73_113289	0.000720997	3.16589e-06	up	1.78866	1.78866	0.838877		Rep: Reverse transcriptase-like - Bos taurus (Bovine), partial (7%) [TC467198]	ACTCCCTGTATGATCAGAGCCCCGCCTCATTATATTATTGTTCTTAACTCTTGTCTCCAT
A_73_P492963,A_73_119565|616092	0.00428671	0.000133389	up	1.78799	1.78799	0.838337	LOC616092	Bos taurus gamma-crystallin F-like (LOC616092), mRNA [NM_001206819]	ATCCATTCCTTCAATGTGCTGGAGGGCTGGTGGGTCCTCTACGAGATGACCAACTACCGG///ACTGGGGGGCTACAAATGCCAGAGTGGGCTCCTTGAGGAGGGCCGTGGATTTCTATTGAA
A_73_115094|536311	0.000929105	6.04006e-06	up	1.78661	1.78661	0.837227	KRT35	Bos taurus keratin 35 (KRT35), mRNA [NM_001076073]	ACGCTGCCCCACCCGTTGACCTGAACCGTGTTCTGAATGAGATGAGGTGCCAGTATGAGA
A_73_P061011|516022	0.00428671	0.000133404	up	1.78224	1.78224	0.83369	OR8G5	PREDICTED: Bos taurus olfactory receptor, family 8, subfamily G, member 5 (OR8G5), mRNA [XM_001788420]	TGTAGCCCCTTGCTGTATAATATTATCATTTCACATCAGGCCTGTTTCTCCCTCATTTGG
A_73_110536,A_73_P374546|521616	0.017512	0.0017163	up	1.78037	1.78037	0.832176	CACNG6	calcium voltage-gated channel auxiliary subunit gamma 6 [Source:HGNC Symbol;Acc:HGNC:13625] [ENSBTAT00000028860]///Bos taurus calcium channel, voltage-dependent, gamma subunit 6 (CACNG6), mRNA [NM_001205888]	TTTTCTTCTGTAAATATGTTTTTCTTTTTTCTCTATGGCTGGATTTGGGTTGCTTGGGGG///TAAATTCTTCACCACGGGAGAGAATGCACACATCTTCCAGAGAACCACGAAGAAAGAGGT
A_73_P491068	0.0151756	0.00135995	up	1.77919	1.77919	0.831223		GB	TTTTATGCTTCGTGCCATTCTCACTCCTATGATGACCCCCCTCATATACAGTCTGAGGAA
A_73_120555,A_73_P357186|524771	0.0188403	0.00190993	up	1.77776	1.77776	0.830064	LOC524771	Bos taurus uncharacterized LOC524771 (LOC524771), mRNA [NM_001098057]	AAGGCCTGGATGGGGCTGGTGCTCAGCAACTGGCTGCTACATCTAAGCGTCCTGTTGTAT///TTGTTACTGTTTTCTCATCTAAAGTGGATGAGGCTACTTCTGCCTGAGGGAATGAGGGAT
A_73_101183|541233	0.00580077	0.000238542	up	1.77751	1.77751	0.829854	RCOR2	Bos taurus REST corepressor 2 (RCOR2), mRNA [NM_001206075]	TCCACCAGCCTGGAGTAAGGAGGGTTGGGAACATATGCAGACATGGGTTTATTTTTCAAT
A_73_P154522,A_73_106166|509167	0.0150564	0.0013444	up	1.7771	1.7771	0.829521	CCL19	LB02451.C21_O02 GC_BGC-24 Bos taurus cDNA clone IMAGE:8702620 3', mRNA sequence [EV716234]///Bos taurus C-C motif chemokine ligand 19 (CCL19), mRNA [NM_001034345]	TTCAGTGATTCACATTCTGTCTTCAGAACACAGAGCTCTCTCTGGGCTGTCATAGGGTAA///AGTGTCATTGTGAGTGTGAGTGTGAGTGAGGATGTGTGGTAAAGATTGCAATGTTTCCAA
A_73_P175142	0.0153951	0.00138987	up	1.77579	1.77579	0.82846		Rep: Membrane protein - Magnetospirillum gryphiswaldense, partial (6%) [TC479407]	TTGTGGTAGATGCCTGGGGTTGGTTGAAAGAAAACAAGGTCCCGGTTTTCCTCTTTTTAT
A_73_P050386|523430	0.00685609	0.000318851	up	1.77548	1.77548	0.828211	SLC25A41	Bos taurus solute carrier family 25 member 41 (SLC25A41), mRNA [NM_001075841]	AAATGTCCCCAAACTCCCCCTTAGCACACTGCAAAGCTCTAGCAGATCTTTGTTGTTGTT
A_73_P066911|528068	0.00108885	9.00935e-06	up	1.7739	1.7739	0.826921	ABCC12	ATP binding cassette subfamily C member 12 [Source:HGNC Symbol;Acc:HGNC:14640] [ENSBTAT00000060942]	TTTTTTATGGTGCTGTTTATTCTCGTGATACTGGCCGCCGTGTTCCCTGCTGTCCTTTTA
A_73_121319|508980	0.0140541	0.00118647	up	1.77327	1.77327	0.826416	LOC508980	GB	TTCATCCTGCTGGGTTTGGTGGAGACGCCAGGGCTGTGGCCAGCTGTCTTTGTACTCTTT
A_73_P084961,A_73_116847|506034	0.0343607	0.00501856	up	1.77255	1.77255	0.825827	OR2L13	olfactory receptor family 2 subfamily L member 13 [Source:HGNC Symbol;Acc:HGNC:19578] [ENSBTAT00000030772]	TCAATCCCATTATCTACAGTCTGAGGAATAAGGAAGTCCTGGGGGCCATGACAAGAATGT///CTGAGGAATAAGGAAGTCCTGGGGGCCATGACAAGAATGTTTGGGATATTCTCTTTTACA
A_73_P056946|532486	0.0189286	0.00192675	up	1.77248	1.77248	0.825772	LOC532486	GB	ACATCATTGTGGTCATCTTGTTCTTTGGTCCTTGCATATTTATATACACTCGCCCTGCAA
A_73_P095286	0.0156541	0.00143332	up	1.77206	1.77206	0.825428		GB	TGGTCTTCCCGTTCATGGGTGCCTACACGTCTGTCCTGAGCTCCACCTTCAGTGGCTTAT
A_73_P133196	0.0119949	0.000898129	up	1.77154	1.77154	0.825003		Rep: 173R - Chilo iridescent virus (CIV) (Insect iridescent virus type 6), partial (24%) [TC462897]	CCTCTTTTCCTGTGTGTTTTGTCTCTAGCCTGGGTTTCATATGTGGTAGAAAAATGTGGG
A_73_114995,A_73_P165572|616286	0.00415409	0.000122435	up	1.77105	1.77105	0.824607	ASB10	ankyrin repeat and SOCS box containing 10 [Source:HGNC Symbol;Acc:HGNC:17185] [ENSBTAT00000033400]	TCTACAGAAGCACCATCGTTTCTACTCCTCCCTCTTCGCCCTGGTGAGGCAGCCCAGATC///TTTCCGCTTCAACATCCGCGCTCTGAGACTCTGGTCGCTGACCTATGAAGAGGAGCTGAC
A_73_P492777	0.0209192	0.00226844	up	1.76799	1.76799	0.822112		PREDICTED: Bos taurus melanoma antigen family B, 4-like (LOC782703), mRNA [XM_003585379]	TTCCACGGTAGGGTCCCTAGTTCCTTCCCAGACCTTTATGACGAGGCGCTGAGAGATCAG
A_73_P076471|787385	0.0220132	0.00245787	up	1.76788	1.76788	0.82202	LOC787385	GB	GCTTTAATTTCTGCAGTTCCATTGTCATTCATCACTTCTTCTGTGATAGCCCCCCACTTT
A_73_110701	0.00328835	7.59297e-05	up	1.76456	1.76456	0.819312		Rep: Reverse transcriptase-like - Bos taurus (Bovine), partial (16%) [TC479243]	ATATTTTTACTTTCTCTTTCAAAGGTGCAACCCCTCTATGCCCTTCACTTGACTTGCCAA
A_73_P432996,A_73_P067396|785741	0.0277946	0.00358815	up	1.7642	1.7642	0.819016	ZBTB32	Bos taurus zinc finger and BTB domain containing 32 (ZBTB32), mRNA [NM_001191224]	TTGCCGCCTAGATATGGCACTCCCTTCTCCCATAGCATCCCTATGACTGGAGCCTGGCAA///TATTCTTGCTCTGTCTGTGGGAAGAGGTTTTCACTCAAACATCAGATGGAGACGCACTAC
A_73_115001|505991	0.0233498	0.00271745	up	1.76418	1.76418	0.818997	CHAC1	Bos taurus ChaC glutathione specific gamma-glutamylcyclotransferase 1 (CHAC1), mRNA [NM_001098882]	CGCCATCGTGGACGCTGTAGGCACTATGCTGCCCTGCTTCTGTCCCACTGAGCAGGCTTT
A_73_P162207	0.00467869	0.000157194	up	1.76389	1.76389	0.818759		Rep: FERM domain-containing protein 1. - Canis familiaris, partial (75%) [TC410559]	GAGGTGCCCAGCAGGCCTCACCTGCCCTGCCGTGGGGACCATGGCCAGTCTGAGCTCCTT
A_73_P192832	0.0306519	0.00417469	up	1.76051	1.76051	0.815995		GB	GACATCCCACCTGAGCAGGGTCTGGGGAGGCACCTGTATCTATGCTATGGCAAAATGTAG
A_73_P115181|532403	0.0297811	0.00399355	up	1.76028	1.76028	0.815805	LOC532403	olfactory receptor family 13 subfamily C member 7 (gene/pseudogene) [Source:HGNC Symbol;Acc:HGNC:15102] [ENSBTAT00000031236]	ATGTGATCTTCCTGGGGGTCCCAGTTCTGTTCATTCTTGTCTCCTACATCTTCATCCTTA
A_73_P489348	0.043961	0.00740237	up	1.75923	1.75923	0.814944			TCTGGGAATCCACTGCTACTGCCGATAACAATAGGTTTCTCCTTGACTTCCCTTTAAGAC
A_73_P055964|510625	0.0276163	0.00354615	up	1.75876	1.75876	0.81456	LOC510625	PREDICTED: Bos taurus olfactory receptor 7A17 (LOC510625), mRNA [XM_002688675]	GTTTCCCTCACTGGTATCCTCTATTCTTACTCTAAGATAGCTTCCTCCATACGAAGAATC
A_73_P056496|536682	0.00198758	2.98516e-05	up	1.75822	1.75822	0.814115	TMEM179	transmembrane protein 179 [Source:HGNC Symbol;Acc:HGNC:20137] [ENSBTAT00000008762]	ACTCTGCTTTCTATGATCAGTTTGCGATTGCCCAGTTCGGCCTCTGGGCCTCATGGCTGG
A_73_P086591,A_73_P465453,A_73_P327421|614496	0.00913315	0.000533251	up	1.7578	1.7578	0.813769	R3HCC1	R3H domain and coiled-coil containing 1 [Source:HGNC Symbol;Acc:HGNC:27329] [ENSBTAT00000036540]///R3H domain and coiled-coil containing 1 [Source:HGNC Symbol;Acc:HGNC:27329] [ENSBTAT00000036539]	CGTGGTGGGCTTTAGTTTGGTCTAGTTTCTGAAGCTGAGTAAAAAATAAAAATTGAAGAA///AGGAGGACGGTCATCTGTCACCTGGACATCAGGTTACCCAGTTCAGACGGATTCTCTGGC///TCTCTGAGTTCCAAGAGAAGGGGTTCAAGATCCAGTGGGTGGACGACACGCATGCACTCG
A_73_118217|535816	0.0031085	6.63479e-05	up	1.75752	1.75752	0.813539	FTCD	Bos taurus formimidoyltransferase cyclodeaminase (FTCD), mRNA [NM_001205399]	GATAGGGGGCTGTGAGGAGTGGGCATGGCTGGGGTTGGCAGTGCCAGTAAAGTGATGACA
A_73_P095176|539153	0.0356653	0.00531371	up	1.75565	1.75565	0.812003	SLC16A14	Bos taurus solute carrier family 16 member 14 (SLC16A14), mRNA [NM_001192187]	TAATCGGATGTTTGTCGCCTTTATTTTCTGGGCTCTGTTTGCCTACAGCAGCTTCGTCAT
A_73_P184497	0.0380335	0.00586371	up	1.75517	1.75517	0.811609		LB01727.CR_C06 GC_BGC-17 Bos taurus cDNA clone IMAGE:8097824, mRNA sequence [DV818806]	ATGTGTTTTCAGTCTGATACCAGTTTTCCATAAATTACTGTGGGTGTGTAACCATGAATG
A_73_P035011|613490	0.0250115	0.00305788	up	1.7544	1.7544	0.810974	C10H15orf59	Bos taurus chromosome 10 open reading frame, human C15orf59 (C10H15orf59), mRNA [NM_001105432]	AACTAGGGCTGGGGAGGGGCTGGGGGGCGGTGGGCACATAGAGCTATAAATATATATATA
A_73_119507|539100	0.0070089	0.000332187	up	1.75359	1.75359	0.810315	KLHDC7B	kelch domain containing 7B [Source:HGNC Symbol;Acc:HGNC:25145] [ENSBTAT00000063783]	AGACCAAAGGGGTCCTCTGCCCGTTCACCCTGACTCTTCCTGCCAGGGGCCCACTGCAGA
A_73_P050601	0.0201861	0.0021289	up	1.75307	1.75307	0.809884		Rep: MGC159457 protein - Bos taurus (Bovine), complete [TC402046]	AACCAAAGTGGCCTTTCCCAATCCCCACCAGCCAAGGTGTTTAGACAGTGTTTATTTTTT
A_73_108291	0.0147428	0.00129752	up	1.75293	1.75293	0.809772		Rep: 39S ribosomal protein L22, mitochondrial precursor (L22mt) (MRP-L22). - Bos Taurus, partial (8%) [TC483330]	CTCTGCCTGAAATTCTGCATGGTCATCTTCCCCAGTTCCTGCAAGTCTTTATTCAAGTGA
A_73_P143966	0.0309887	0.00425488	up	1.75109	1.75109	0.808254		1266935 MARC 7BOV Bos taurus cDNA 3', mRNA sequence [DN523439]	GTGGGCTTCTTTGGCAGTGTGGTGTGGTAAAGAATCCACCTGCTTTCATTTTCAAATTAC
A_73_P090866,A_73_P489673|788285	0.0177911	0.00175465	up	1.75037	1.75037	0.807663	LOC788285	Rep: Olfactory receptor MOR113-4 - Mus musculus (Mouse), complete [TC399906]	CAAGTGAAGAAAGCCTTCATGAATACGATACATAGAGTTGTTTCTTTCTCAAAGGAATGA///TCTATGGCCTAAACCTTGACTTCTGCGCCTCCAACGTTGTTGATCATTTCTATTGCGACT
A_73_P276826,A_73_P449291,A_73_120603,A_73_P264421|536781	0.00156822	1.87229e-05	up	1.74751	1.74751	0.805303	LDB3	Bos taurus LIM domain binding 3 (LDB3), mRNA [NM_001035416]	AAATTCTTAACGTTAAAAGCTAAGAAAGAGGCTGTCTGGAATCCCCCCATTCCCTGCAGG///TGAGCCCCATGGTGATGCTTGAGAATGTATAGCTGTGCTGGGGGGCACCTTTGCTCGTCA///GTGTGTGCTGGCTCCCTAGTTCCCTCTCCTGTACATACAAGCATGCTTATTCTGAAATAA///TTACGCAACTGGCACCATGGCCTTTCGGCCCAAATTCTTAACGTTAAAAGCTAAGAAAGA
A_73_P120021	0.0481108	0.00849793	up	1.74465	1.74465	0.802941		Rep: RING-H2 finger protein ATL3C - Arabidopsis thaliana (Mouse-ear cress), partial (7%) [TC461323]	AGGGGAGATGACGGCTTTTCCAACAAAGACTCCTCATTTCTAATATAAAGAGTTGATTTT
A_73_P034196|516158	0.0143029	0.00123135	up	1.74426	1.74426	0.802616	LYNX1	Bos taurus Ly6/neurotoxin 1 (LYNX1), mRNA [NM_001046221]	CCACCCTGAGGTCTGCTTCCCGTTTGTGATCTGGTTTCCTAAAGGCTGATGTGGGACTAC
A_73_P288946,A_73_121063|505647	0.000393677	6.69355e-07	up	1.74399	1.74399	0.802392	CFD	Bos taurus complement factor D (CFD), mRNA [NM_001034255]	TCAAGTCTACGGAGGCATCATGGCAGACAGATCCCTGCACCTGGTGGTTCTGATCCTCCT///AGGCCCTGAGAGGCTGCGGTCACGGGGCCCGAGCAATAAAATCATCCATTCCTGCAAAAA
A_73_P511298	0.00839592	0.000462277	up	1.74398	1.74398	0.802384			TAGACTGTTGGGGTGCAATGTGTTCCAGAGGAGAGCTGCCCCCCATGGACAAGATGCTGT
A_73_120577|510688	0.0120144	0.000900048	up	1.74354	1.74354	0.802022	NRROS	Bos taurus negative regulator of reactive oxygen species (NRROS), mRNA [NM_001034391]	AAATGTTTCCATCCCTTAGTTGTCCCAGGTTCTTCCTCCTTCACTGTGGTATATCCTCAA
A_73_P072826	0.033246	0.004783	up	1.74242	1.74242	0.801095			ATCCTGCTTGTGGTGGCTAACTTGATTCCCTTTTACTTTCTCAATCCCGTGTATATATTT
A_73_P171752|788352	0.0109239	0.000762946	up	1.74219	1.74219	0.800903	NKAIN3	PREDICTED: Bos taurus Na+ [XM_001255438]	AGTAGCCTTGTTCGCTAGATGAGTTGTAGGTGCTTGGGTGGGTATTTTTTCAGTCGTTTC
A_73_P032581,A_73_110682|493717	0.00389503	0.000106735	up	1.74196	1.74196	0.800715	NLRP5	Bos taurus NLR family pyrin domain containing 5 (NLRP5), mRNA [NM_001007814]	TGAGTATCCACTTCAGTTCGGTTGTCGGTGTCTGCCTCTGATGACGGCGTGTGCCCTTCA///GTGTGCCCTTCACGTCCTGGGACTTCAGTTCTCTGTGAAGCGCTGTCCTACCTGAACACA
A_73_P080606|528437	0.00658903	0.000296951	up	1.7408	1.7408	0.799754	ESRRB	estrogen related receptor beta [Source:HGNC Symbol;Acc:HGNC:3473] [ENSBTAT00000016290]	TACAGATTTCTCCTCCTGCTAAAAAGCCATTGACTAAAATCGTCTCCTACCTGCTGGTGG
A_73_P492558	0.0132266	0.00106228	up	1.73924	1.73924	0.798454			TAGCCAGGAGGTCGGAATTGGCATTGTGCCCAGGCTTAGGGTCAGAAGACAGGGCAGAAT
A_73_115272|538875	0.0187525	0.00189601	up	1.73907	1.73907	0.798318	MYBPHL	Bos taurus myosin binding protein H like (MYBPHL), mRNA [NM_001192119]	AGCTGCACGGTCCCCAACCTCATCGTCGGCAACTCCTACACATTTCGAGTCTTTGCTGAG
A_73_121193|525727	0.014722	0.00129175	up	1.73866	1.73866	0.797973	BOLA-DOA	Bos taurus major histocompatibility complex, class II, DO alpha (BOLA-DOA), mRNA [NM_001205920]	GTCCTATAGGTCTCCTCCTTTTTGGCCCCCATACTCATGGCAGGGACTTGTGGGGAACCA
A_73_P080776	0.0200714	0.00210821	up	1.73833	1.73833	0.797704		tetratricopeptide repeat domain 7B [Source:HGNC Symbol;Acc:HGNC:19858] [ENSBTAT00000008385]	GGCAACTCTCCAGAAGTATACTTTCATGGTTTTCCCTCCCTTTTTTCAGTTAGCTCCATC
A_73_P131986	0.0392553	0.00616784	up	1.73731	1.73731	0.796859		CR850025 Normalized and Subtracted bovine endometrium tissues (bcbp) Bos taurus cDNA clone bcbp0004.l.16 5', mRNA sequence [CR850025]	TCTGTATTTTTCCTGCAGCTGTAATTGCCGAGTGCCTGTTGTATACTTTATAGAGTTGAA
A_73_117847	0.00475712	0.000165888	up	1.73664	1.73664	0.7963		Rep: Scavenger-receptor protein - Sus scrofa (Pig), partial (46%) [TC466817]	ATGCTGGTGTGAGGTGCTCTGAGTTATCTGATTTTGAAGCTGCTGTTGATGAAGCTGTGT
A_73_P167652,A_73_P046110|512150	0.0044775	0.000143266	up	1.73403	1.73403	0.794127	LOC512150	Bos taurus myeloid-associated differentiation marker-like (LOC512150), mRNA [NM_001104975]	ATCATATGGGACTGTTATAAGCTCAAGGAGATCTTCTTCTATGTGCACACCACGCGATCC///TCTGTCTCCTTCCTGGTTTCTTTGGTTGTTCAATTTCTGTTTTGTCTCTTTCTCTTGCTT
A_73_P030711,A_73_P248641|768319	0.00580061	0.000237872	up	1.73319	1.73319	0.793426	MT1E	Bos taurus metallothionein 1E (MT1E), mRNA [NM_001078134]///LB0041.CR_D11 GC_BGC-04 Bos taurus cDNA clone IMAGE:7961629, mRNA sequence [DT829120]	GTCTCTTACTACCTTGATGCGATACGACATTCCTTTTTCTATGAAATATGTGAATTGCAA///AGACTCTAATTTTGAATGGAGAGTACTGAGGCTCCAGACTATCCTTGTTGTCCTCAGCCA
A_73_P064796|786156	0.00315491	6.80613e-05	up	1.73316	1.73316	0.793408	CCL1	C-C motif chemokine ligand 1 [Source:HGNC Symbol;Acc:HGNC:10609] [ENSBTAT00000047653]	ATATATTTAAATTCTAGAATCTTTAAGTTCTGTCCCCCACCCCCTCTGTGCCTCTTAGAC
A_73_P084206,A_73_107438|512484	0.00051691	1.68088e-06	up	1.73314	1.73314	0.793392	TYK2	Bos taurus tyrosine kinase 2 (TYK2), mRNA [NM_001113764]	TCATGACCTATGCACCTCCTAATACCATCACTTTGTGTGTGTGTGTGTGTGTGTAAGCAC///ATGCTGCCTTGTAGGACTAATGTAAAGAGCTAGTAAGGTCATCAAATGCTTAGCAGATAT
A_73_P332381,A_73_P273606,A_73_P048499,A_73_P249881|781494	0.000904531	5.60744e-06	up	1.73305	1.73305	0.793316	LOC781494	Bos taurus uncharacterized LOC781494 (LOC781494), mRNA [NM_001101279]	CACTATAAGTTCAAGAACATCCCCTGCTACGTGCACACATTACCAGGCCTGCTAAAGATT///CTGTTGCTTTATGCTGCTGCTTCCTGAGTTTCTGGAATCAGGTAAAATAAACATAGAATT///TCCATTGCCAAAGGAACTGCATTGCTTGAGTGTGAGAAACACACGTGTGTGTGTTTCTGT///TCCTAAAGAGAAAGTTTCTTTTCAGAATTTCTTAGGCAGGTGGTTTGGGGGTGGGTGTGG
A_73_P224262	0.000562476	2.00242e-06	up	1.73262	1.73262	0.792958			GGAATTTTGTATGTGTTGCATGTGTGTGTGTGTGTGTGTCTGTGTGTGCCCATAGTACAC
A_73_110483	0.0236565	0.00279225	up	1.73142	1.73142	0.791958		semaphorin 5A [Source:HGNC Symbol;Acc:HGNC:10736] [ENSBTAT00000006610]	GAGTTCAACTTGTTCCACATGATTGCCGTGGGGCTCAGCAGCTCCATCCTAGGCTGCCTT
A_73_102363,A_73_P074816|539813	0.0062525	0.000271393	up	1.73092	1.73092	0.791535	KCNG1	Bos taurus potassium voltage-gated channel modifier subfamily G member 1 (KCNG1), mRNA [NM_001205719]	CTCTGAGGCTTGACGCTATCACCATCGCTGCAGAAGCCTCCAAAGGCACATGCTGCTTCT///AGGTGTTCGCCTTCCTGTCGGTGCTCTTTGTCACGGTCACAGCTGTCAACCTCTCCATCA
A_73_P165822	0.015007	0.00133209	up	1.73067	1.73067	0.791331		PREDICTED: Bos taurus immunoglobulin superfamily, DCC subclass, member 3 (IGDCC3), mRNA [XM_608288]	TCTGGTGAGCGACCTGGAGCCTTCCACTGCCTATAGCTTCTACATCAAAGCCTACACGCC
A_73_100824	0.00159455	1.95574e-05	up	1.73013	1.73013	0.790883		paired box 5 [Source:HGNC Symbol;Acc:HGNC:8619] [ENSBTAT00000016584]	CTGGGAGTGATTTTTCCGGGAGCCCCTACAGCCACCCTCAGTATCCCTCGTACAACGACT
A_73_101648|532797	0.0117671	0.000872983	up	1.72969	1.72969	0.790516	IMPAD1	Bos taurus inositol monophosphatase domain containing 1 (IMPAD1), mRNA [NM_001046335]	AATTTCTGTGTGTGTGTGTATTGTTTCGTTTTGGTTTGTTTTTATAAAGAGACGTGTGCC
A_73_104113|523473	0.0346658	0.00507743	up	1.72892	1.72892	0.789874	TAS1R1	taste 1 receptor member 1 [Source:HGNC Symbol;Acc:HGNC:14448] [ENSBTAT00000022243]	TGAGTGGAGGCTTCAGCGGTTATTTCCTTCCCAAGTGCTACGTGATTCTGTACCGCCCGG
A_73_P079566	0.0125563	0.000974685	up	1.72737	1.72737	0.788578		olfactory receptor family 4 subfamily K member 1 [Source:HGNC Symbol;Acc:HGNC:14726] [ENSBTAT00000052685]	TTTTGCTCATTTCTTACACTATCATTCTTGCTACTGTCCATCGCCAAGCCTCTGGTGGGA
A_73_P043591|507185	0.0218255	0.00242005	up	1.72649	1.72649	0.787842	SLC51B	Bos taurus solute carrier family 51 beta subunit (SLC51B), mRNA [NM_001077867]	GGAGTGTTCGCAGACAGAGTGAGTGAACTGCAATCAAACTAAAACCCTGTTTTGAAAAAA
A_73_111696	0.0206897	0.00222558	up	1.72648	1.72648	0.787833		immunoglobin superfamily member 21 [Source:HGNC Symbol;Acc:HGNC:28246] [ENSBTAT00000025516]	TTAAACTATTTCCAGTCTTGTTCTTAGTCCTTTCTGTCCGTGTCTTGGCTCCTTCGGTCA
A_73_P492528	0.00574033	0.000233208	up	1.72618	1.72618	0.787585		C0009510C22.P1KM13F KN510 Bos taurus colon [FE017569]	ATTCTGTGCTTGAGCATTTGTGCTGTGTGTCCTCAGGCTATTATTTAGACCTACTTAAAT
A_73_108363|509651	0.00718371	0.000350858	up	1.72606	1.72606	0.78748	OR2AG2	GB	CAGATATGAACTCATGGTATATGTGACAGTTGTGACTTTCGTCTTGCTCCCCCTTTCTGC
A_73_101305	0.0383697	0.00595557	up	1.72469	1.72469	0.786336		Rep: Voltage-dependent calcium channel gamma-4 subunit - Rattus norvegicus (Rat), partial (77%) [TC416199]	CTTGTGTCTCTCCAGTTACATACCTGTGAATCCTGTACTTACTACTGGTTTGGGGTTGTT
A_73_P093896|507344	0.0204164	0.00217728	up	1.72371	1.72371	0.785516	GBX2	Bos taurus gastrulation brain homeobox 2 (GBX2), mRNA [NM_001192145]	AAGATCGTCGTCCCCATACCCGTCCACGTCAGCAGGTTCGCTATCAGAAGTCAGCATCAG
A_73_109696,A_73_P032806,A_73_P084511,A_73_P399386|530411	0.00874895	0.000493402	up	1.72305	1.72305	0.784967	UHRF1	Bos taurus ubiquitin like with PHD and ring finger domains 1 (UHRF1), mRNA [NM_001103098]	AGGAAGGAACAAAGTTGGACTTCTCAGTGTTTTTATTTTGGTTTTAAACAAAAAGCCTGC///CAGAACAGGGATATTTTTAAGTCACATAACTGCAGACAAACTGGAGCAATACTGTTTTAA///TTTCTGAGCAAAGTGGAGGAGACGTTCCAGTGCATTTGCTGCCAGGAGCTGGTGTTCCGC///CAACTCACCAATTGGGAATTACAAGAGGGAAACCTTTTAAAATGAATAAACACCTTTTCC
A_73_101478|530544	0.00145082	1.64526e-05	up	1.72113	1.72113	0.783358	CAPN12	Bos taurus calpain 12 (CAPN12), mRNA [NM_001192697]	TGCGTGTGGACTTTGAGCGCTTCGTGTCCTGCATGGCCCAGCTCATCTGCGTCTTCCGCT
A_73_P511053	0.00235423	3.8389e-05	up	1.72113	1.72113	0.783355		Rep: LigA - Methylobacterium sp. 4-46, partial (3%) [TC436305]	TATGATGTAGAAAAGCAACAGACATCGGCCAGAGCCCCGGCTCTCTTCGCGGCGCACCCC
A_73_P097806	0.0157233	0.0014433	up	1.72026	1.72026	0.78263			GAGACTCTCTCCCATGTCTTCTTGTCCTCATTCTGAATCTCATTGGAAATCATTCCTTTC
A_73_P087226,A_73_P035816|615555	0.0142621	0.00122472	up	1.72011	1.72011	0.782498	NEUROG2	Bos taurus neurogenin 2 (NEUROG2), mRNA [NM_001144105]	GGTTCAGACATGGACTATTGGCAGCCCCCACCTCCAGACAAGCACCGCTACGCACCTCAC///TCAAATCCGAGACCTTGGAGTTAAAGGAGGAAGAGGACGTGCTGGTGCTGCTTGGCTCGG
A_73_P428486	0.00254544	4.47667e-05	up	1.71967	1.71967	0.782135		Rep: G-protein coupled receptor 114 - Bos Taurus, partial (95%) [TC412351]	TCTGCTGCCCAGAATGCCTCCTTCTTTTCTACTTGGCCCCGCGAGAATCAGGTGGGCTTT
A_73_106874,A_73_P314936,A_73_P446856|516085	0.000972362	6.72003e-06	up	1.71957	1.71957	0.782045	CYP4A22	Bos taurus cytochrome P450, family 4, subfamily A, polypeptide 22 (CYP4A22), mRNA [NM_001098990]	CATGTGTCAGTCATGTGGCTTCCCCTCTCTTGCTCTCCCTTAATAAAGTTTGCATGTCAA///ATCCAGGACTTTTGTGATTAGATGAACAACTCAGATAAGACAGACTTGTTCTCCTGTCTG///AAGAAAGAGTTCCAAAAGGAGAGTGAGCTGCCACCACTACTGGAAAGGGTAGAGAAATAC
A_73_120777|508869	0.00304515	6.45307e-05	up	1.71812	1.71812	0.780834	RND1	Bos taurus Rho family GTPase 1 (RND1), mRNA [NM_001046016]	AGTCGGGGGGAGGGGGGAGTGTTTCAATCTGTTCTATGTTCTGTGTTTAAAGAAGAAAAC
A_73_P064076,A_73_112856,A_73_P064081|541153	0.00110391	9.3331e-06	up	1.71635	1.71635	0.77934	DTNA	Bos taurus dystrobrevin alpha (DTNA), mRNA [NM_001076260]///dystrobrevin alpha [Source:HGNC Symbol;Acc:HGNC:3057] [ENSBTAT00000048673]	GAGAATGAGCTGAAGATGGAGGAATACCTAAAACAGAAGCTACAGGACGAAGCCTATCAG///CAAACGTTCGCTCTCCTTTTCTTTCTGAATGTGTTTTGCCTTAACTGGCTCCCTGGTGTT///GCCTCTGGTTTCTGTTTTAAGGGTGCTGTTCAATAAAGCTGTGTACACTGAACATCTTTC
A_73_P102696,A_73_P106936|282316	0.00389503	0.000107003	up	1.71622	1.71622	0.779231	POU5F1	Bos taurus POU class 5 homeobox 1 (POU5F1), mRNA [NM_174580]	AACGACTATCTGCCATTTTGAGGCTTTGCAGCTCAGTTTCAAGAACATGTGTAAGCTGCG///TCAAGCAGTGACAACTCCCAACGTGAGGATTTTGAGGCTGCTGGGTCTCCTTTCGCAGGG
A_73_P511008	0.00460048	0.000151345	up	1.71591	1.71591	0.778971		C0009514P22.P1KM13F KN510 Bos taurus colon [FE020880]	TTGGCGAGGAAACCCACTGTGTCGCTGTGTCTGGCCTCATGTGGCCTGGTGACAAATTTG
A_73_116571,A_73_P049121|280758	0.0165088	0.00156893	up	1.71562	1.71562	0.77873	DBH	Bos taurus dopamine beta-hydroxylase (DBH), mRNA [NM_180995]	AGCCCCCACGGAGGGTGATCGGTGTTGAGTGTGACGGGTGCAAGTGCTGTTGTACTTAAA///TTCCTGCACAAGTACTTCCGCCTCGTGAACAGGTTCAACAGCGAGGAAGTCTGCACCTGC
A_73_117576,A_73_P052231|511941	0.0220132	0.00246776	up	1.71468	1.71468	0.777942	CEACAM19	Bos taurus carcinoembryonic antigen related cell adhesion molecule 19 (CEACAM19), mRNA [NM_001080261]	CCAGAGGGATGGCAGTGCCATGCATCAGCGAGACATTGTTGGCTTCTCCAATGGCTCCAT///CTGTCCTCAATGTGGGTTCCATCTCTCACCCTCTAATTTATTCATTCATTCAGCAATAAA
A_73_P093926	0.00327301	7.5358e-05	up	1.71259	1.71259	0.776179		PREDICTED: Bos taurus kelch-like 30 (Drosophila) (KLHL30), mRNA [XM_001256117]	TCTACCTGGTGGGCTCCAGTGCTTGCAAGTACAATGCCCTGGCTCTGCAATGCTACAACC
A_73_115442|508160	0.0174761	0.00170891	up	1.712	1.712	0.775687	PADI3	PREDICTED: Bos taurus peptidyl arginine deiminase, type III (PADI3), mRNA [XM_010802689]	TATGTCCGTTCCATGGGTGCTCTGTGTGGGGCCAGCTGTGCTTCCGTCACTGGCTAATAA
A_73_114815	0.000375078	6.01499e-07	up	1.71162	1.71162	0.775363		ATPase phospholipid transporting 8B3 [Source:HGNC Symbol;Acc:HGNC:13535] [ENSBTAT00000031583]	TCATCTTCTGGGGCTTTCTCATCCTGCTCAGCGTCCTGGTGCCCATGGCCATGTTCATTA
A_73_102619	0.0208206	0.00225287	up	1.71097	1.71097	0.774816		Rep: LOC783604 protein - Bos taurus (Bovine), partial (18%) [TC428096]	CATGGTTGCCAGCATATAGTAGTGCTCAGCAAATCCAGTTCTCTTCCTTCCTTTCCTTTG
A_73_119259	0.00176681	2.39487e-05	up	1.71029	1.71029	0.774244		Rep: Uncharacterized protein C11orf81 - Homo sapiens (Human), partial (27%) [TC484683]	CGCTCTCTGCTCCCTGTCCTGTCCCCTTCTTTTGTATTTGGAAACAAACGTGTTGTAATA
A_73_P066556	0.00303608	6.42224e-05	up	1.7079	1.7079	0.772227		PREDICTED: Bos taurus myosin XVB pseudogene (MYO15B), miscRNA [XR_082718]	AGTCTGGTTTGGACTTCAGTGCTTGGCTGTCCTGGAATCCACTGTAGCACGGCCCACAGT
A_73_P083361	0.0372688	0.00568353	up	1.70779	1.70779	0.772134		hemicentin 2 [Source:HGNC Symbol;Acc:HGNC:21293] [ENSBTAT00000007111]	TCAACAAGGCGGTGCTAGAAAATGCCTCCGTGACCTTGGAGTGCCTGGCTTCCGGCGTGC
A_73_P060171|100139581	0.0383697	0.0059559	up	1.70688	1.70688	0.771358	CRTAC1	Bos taurus cartilage acidic protein 1 (CRTAC1), transcript variant 1, mRNA [NM_001191289]	GCCTCATCTCTTTCTCTAGGCCTTGGACTTTTCCTTCAGTTATATGCACTTTAAATTCCA
A_73_118868|614322	0.0124948	0.000965615	up	1.70657	1.70657	0.771095	RUNDC3A	Bos taurus RUN domain containing 3A (RUNDC3A), mRNA [NM_001076322]	TCAGGAAGCTGCTTCTTCCGGTGACCCCGATGCCTGGTTAGCTCCCAGCTGGACTCTCCT
A_73_105017|515323	0.000972362	6.70746e-06	up	1.70615	1.70615	0.770746	FZD10	Bos taurus frizzled class receptor 10 (FZD10), mRNA [NM_001098033]	ATCATCTTCCTGTCCATGTGCTACTGCGTCTACTCGGTGGGCTACATCATCCGCCTCTTT
A_73_P120686	0.00947871	0.000574146	up	1.70561	1.70561	0.770285		962699 MARC 2BOV Bos taurus cDNA 3', mRNA sequence [CK773992]	TGTGCCCCCGCAAAGTTACACAGTTTTTTGCATGTGTCTCTGTATGTATATGTGTTACAT
A_73_109324|538468	0.00542137	0.000208658	up	1.70424	1.70424	0.769128	GPR157	G protein-coupled receptor 157 [Source:HGNC Symbol;Acc:HGNC:23687] [ENSBTAT00000016736]	GAGGTGCCAACTGCATCATGTTCGTCTTCTGCACGCGTGTGGTCAGGACCCGGCTCCTCT
A_73_P084436,A_73_P084441,A_73_104379|617345	0.0193713	0.00200665	up	1.70394	1.70394	0.768874	VAV1	Bos taurus vav 1 guanine nucleotide exchange factor (VAV1), mRNA [NM_001078074]	TGTTCTTCAAGACACGAGAACTAAAGAAGAAGTGGATGGAGCAGTTCGAGATGGCCATCT///TGCCAGCTGCTCAACAACCTGCTGCCCCATGCCATCAACCTGCGGGAAGTCAACCTGCGT///ATTTATAACACATGCATTTCCTCCTGGGTCCCCTTGAGAAGGTGGGGCTCCAGGCAACTA
A_73_P079376|101904911	0.0205022	0.00219073	up	1.70241	1.70241	0.767578	LOC101904911	Rep: Olfactory receptor MOR223-6 - Mus musculus (Mouse), partial (96%) [TC399347]	AGTTGCTTCATGTTAATTCTGCTCTCCTATGCCAACATAGTCCACGCCATCCTGCAGATT
A_73_103427|531092	0.00546759	0.000211272	up	1.70112	1.70112	0.766487	MMP25	matrix metallopeptidase 25 [Source:HGNC Symbol;Acc:HGNC:14246] [ENSBTAT00000021843]	TGCGGGGCGGCCTTCGGTGCTCCTCCTGCCTCTTCTGTCCCTGCTGGTGGGGGGCCTGGC
A_73_P395036	0.00215665	3.39115e-05	up	1.70089	1.70089	0.766286		peptidoglycan recognition protein 2 [Source:HGNC Symbol;Acc:HGNC:30013] [ENSBTAT00000047024]	AGAATCGTAAACCTCTCCTTAGAGAGCACGGCCACCCCTCCGGATGCTGGAGTCACCTTT
A_73_115040	0.00904737	0.000527504	up	1.69989	1.69989	0.765439		NLR family CARD domain containing 5 [Source:HGNC Symbol;Acc:HGNC:29933] [ENSBTAT00000007129]	TCAAGGAATGTCAGCTGGAGCCCCTGAGCCTCTCCTACCTCTGCAAGTCTCTGGAGAAGT
A_73_P492453	0.0113753	0.000821769	up	1.69902	1.69902	0.764703		Rep: Uncharacterized protein ENSP00000381760 - Homo sapiens (Human), partial (95%) [TC456594]	TCCATGTTCTTCCTTCCCCCAATCAGTTAGAGAAGGCAGCCATAAAGATTCAGTCATGGT
A_73_P030406|518368	0.00832446	0.000452299	up	1.69823	1.69823	0.764029	PARM1	Bos taurus prostate androgen-regulated mucin-like protein 1 (PARM1), mRNA [NM_001075771]	ACCTGAGGCGCCTTGAGCGACAATCCTGTTTTGTTGGTTTGGTTGTTTTGTTTTCTTCCT
A_73_117721	0.0462303	0.00798571	up	1.69762	1.69762	0.763518		Rep: Sjogren's syndrome/scleroderma autoantigen 1 - Bos Taurus, complete [TC465354]	TAAATACTGTCTTAGCATTGGTGTGTTCTGACTGCTTGGCTCTGGGGCGGGAAGATAGCG
A_73_P081976|516422	0.00564905	0.000224218	up	1.6958	1.6958	0.761969	ADRA2B	Bos taurus adrenoceptor alpha 2B (ADRA2B), mRNA [NM_001206628]	TATTCTTGCCTCCAGCATTGGATCTTTCTTTGCACCCTGCCTTATCATGATCCTGGTCTA
A_73_120912,A_73_P044926|281126	0.0205022	0.00219113	up	1.69559	1.69559	0.761791	DRD2	Bos taurus dopamine receptor D2 (DRD2), mRNA [NM_174043]	CCCACACTCTGTAACATCACTACACATGCTCCACACTAATAAAACTTTGACAAGAGAAAA///TTTCTTAGCAAATGCTGGGCTAGTGGGGGCTCTGGCAGAGAAGGTGGGCTCGTCACATGT
A_73_P078406,A_73_118852|514653	0.0115542	0.00084111	up	1.69508	1.69508	0.761357	P2RY4	Bos taurus pyrimidinergic receptor P2Y4 (P2RY4), mRNA [NM_001256557]	AGTCATCTTCCCGTCTGCGCTCTCTGCATACCATCGCTGTGGTGTTGACTGTCTTTGCTG///CCTGGATCCTGTGCTCTATTTGCTCACTGGGGAAAAGTACCGACGTCAGCTCCAGCAACT
A_73_105440	0.0320585	0.00449113	up	1.69476	1.69476	0.761085		BovGen_17868 normal cattle brain Bos taurus cDNA clone RZPDp1056M0647Q 5', mRNA sequence [CO889543]	TAAGCCCCACAGACCTCACTGCTACCGCTGTGCTCACAACCTTGTCCGGGATTTTAAGGA
A_73_111007	0.0425993	0.00701531	up	1.69434	1.69434	0.760721		GB	TCTGTACAACTGAGAAAATTCACATCTTCAATGACATCTGTGTCCTCTTGTCCTGCGTCA
A_73_P493783|617592	0.0123596	0.000947147	up	1.69429	1.69429	0.760679	LOC617592	GB	TTGGATGGGACCCTACCATGTGCCCTTCACAGCCTGCATGACCCAACTCTTCTTCTTCAT
A_73_P168027	0.0213139	0.00233322	up	1.6941	1.6941	0.760518			GTAGCATATCATCTGCATATAATGACCATTTTACCTCTTCCCTTCCAATTTGGATTCATT
A_73_105858,A_73_P360911|617975	0.00159455	1.9725e-05	up	1.69297	1.69297	0.759558	H1F0	Bos taurus H1 histone family, member 0 (H1F0), mRNA [NM_001076487]	CCCCTCGCCCCTTTTTATTTTTAAATAAGTGTTATTTGTGCCTGGAAGAACTTGCTGTCT///TGTGTGTGTATATATATACATATCTAGGGCTAGTACTTAACGTTTCACACCCGGGAGCTG
A_73_107229	0.0454945	0.00779955	up	1.69268	1.69268	0.759311		Rep: TP53 regulated inhibitor of apoptosis 1 - Bos taurus (Bovine), partial (79%) [TC477937]	ACCTTTGTTGGTTACACATGTTGTGAATCTCTTCTCCCAATTTTTAGCTTGTGTTTTAAG
A_73_109830	0.00136901	1.5159e-05	up	1.69244	1.69244	0.759104		Rep: Sarm1 protein - Xenopus tropicalis (Western clawed frog) (Silurana tropicalis), partial (5%) [TC468356]	TTTGTTAAATCCTAACTGTCTGCCGTGCCCCCTGACTTCTTTTAAATGGACATGCATGCT
A_73_117953	0.0145242	0.00126495	up	1.69229	1.69229	0.758975		membrane spanning 4-domains A10 [Source:HGNC Symbol;Acc:HGNC:13368] [ENSBTAT00000002270]	TGCCTCTTGTCCCTGACTCACCATTGGAGCTCAAGGAACAGTCGATGATGCCTCCACCGT
A_73_116365|538511	0.0246221	0.0029821	up	1.69182	1.69182	0.75858	GPR142	G protein-coupled receptor 142 [Source:HGNC Symbol;Acc:HGNC:20088] [ENSBTAT00000056582]	TCAACTTCGGCCTCTACTGTTTCGTCAGCAAGACTTTTCGGGCCACTGTCCGAGGGGTCT
A_73_P421226,A_73_P508073,A_73_P031291|515755	0.00440025	0.000139282	up	1.69163	1.69163	0.758416	LOC515755	Bos taurus solute carrier family 6 (neurotransmitter transporter, glycine), member 9 (SLC6A9), mRNA [NM_001102032]	AGGCCTATGAGGACGAGTCAGAGAATGGTTTTATGCCCGACGAGGACCACAGCCTCCAAC///AGCAGAGGCCCATGACCTAACAACCTGCCCAAAGAATTCGTTTCTGGGGGGTGATGCTCA///CCATCTGCGTACCACTAGGATTTTAAAGTCCATAGGTTTTAATGAAATTTCTATTCCTGT
A_73_109197,A_73_P093726|538609	0.010858	0.000752476	up	1.69111	1.69111	0.757971	HEYL	Bos taurus hes related family bHLH transcription factor with YRPW motif-like (HEYL), mRNA [NM_001024565]	ATTGGTTTCCATGGCTGAGGGCACGTGTATCTTTGTTTATGTTCCCAAACCTTTCTGGTG///TTTTCTGCTCTGCTTCCTGGACTGGTTATGTATGAAGGTATCTTCACCCATCCAAGGAAC
A_73_P433206	0.00258783	4.64258e-05	up	1.69097	1.69097	0.757847			ATCTTCTTGGTTATTTGTTTTTAGGCCATTTCTTGGTGGTGCCTTCTGACCCGACCTTCT
A_73_P055831,A_73_115120,A_73_P490103|526221	0.00275315	5.21405e-05	up	1.6899	1.6899	0.756942	DRD5	Bos taurus dopamine receptor D5 (DRD5), mRNA [NM_001206629]///GB	TCATGATCGTGACCTACACGCGTATCTACCGCATCGCCCAGGTGCAGATCCGTAGGATCT///TATGGTTCCTTTCTGCAGTAGTGGGGATGCCGAGGGCCAAAAGACTGGCTTCCCTTGTGT///TGCTCCAGCTGAGGAATTCTTCCTGATCTGTTCTGATGTCTAATAAACACAAATTATGTG
A_73_P236405	0.00198758	3.00101e-05	up	1.68923	1.68923	0.756368		LB004140.C21_N19 GC_BGC-04 Bos taurus cDNA clone IMAGE:9059349 3', mRNA sequence [EV693857]	TTTAAGTTTTCCTTCTATGAGGGGCTGGCCATCTTGATTTATAACTGATTAATGTCTTTC
A_73_102457,A_73_P077976|527180	0.00475712	0.000165361	up	1.68914	1.68914	0.756286	GABRQ	Bos taurus gamma-aminobutyric acid type A receptor theta subunit (GABRQ), mRNA [NM_001192639]	CTCCTCTTCCCTCTTGCCTTCGTGGTGTTCAACATTGTGTACTGGGTGTATCATATCTAT///TTAATGGTATTGATGTTGATAACAGTGTTGTTCCCACCGAAATCCGCAACCTTGCTGAGA
A_73_118903|524447	0.00715188	0.000347354	up	1.68783	1.68783	0.755172	LRFN2	Bos taurus leucine rich repeat and fibronectin type III domain containing 2 (LRFN2), mRNA [NM_001192595]	AAATGGCATGCTCTTGCCCTTCGAGGAGAGTGGCCTGGTAGGGGCCCGAGGAACTTTCGG
A_73_121299|281606	0.043493	0.0072837	up	1.68697	1.68697	0.754433	ADRB3	Bos taurus adrenoceptor beta 3 (ADRB3), mRNA [NM_174232]	GCTCCTGGTTTCCTGGGAAGGTGAACCATTAGAATGGGTCCCTTTTCCTTTTGAAATCAA
A_73_119341	0.0248891	0.00302989	up	1.68665	1.68665	0.754164		BovGen_25313 normal cattle brain Bos taurus cDNA clone RZPDp1056C221Q 5', mRNA sequence [CO896988]	TCAGAGCCCAAGCACCAAGGGCTGGCCCTGGGACCTGCCCAGGCCAAGGTTTTGTTACTT
A_73_108785,A_73_115784|616243	0.00654794	0.000294352	up	1.686	1.686	0.753606	PHYHIP	Bos taurus phytanoyl-CoA 2-hydroxylase interacting protein (PHYHIP), mRNA [NM_001076415]	TCTTCCGCCATGCCCAGGACCTCATCCTGGAGATCATCTACACCGAGCCGGTTGACCTGT///CTGGTGGCCTCTTCTGTAGCCACAGGGAATGGTGTGGTCATCTGTCTTTGTGGCCTGGAT
A_73_P180707	0.0245049	0.00296043	up	1.68561	1.68561	0.753271		Rep: MKIAA0299 protein - Mus musculus (Mouse), partial (48%) [TC454680]	GGTGTTAGGGAGTGTTCTAATTTCAGTCTTTTATGTGTAGTTGTCTGATTTTCTCAACAA
A_73_P089481|515772	0.0471613	0.00825098	up	1.68558	1.68558	0.753246	OR2A5	olfactory receptor family 2 subfamily A member 5 [Source:HGNC Symbol;Acc:HGNC:8232] [ENSBTAT00000009728]	TAAGCTCAACCAAGTTGTCATTTTTGCTGCTTCTGTGTTTATCTTAGTCGGGCCCCTCTG
A_73_120245|513386	0.0147428	0.00129718	up	1.68547	1.68547	0.753151	LTB4R2	Bos taurus leukotriene B4 receptor 2 (LTB4R2), mRNA [NM_001191287]	CCCTCGGCTCAAAGTGGTGGGGCGGGCCGGCGGCAATGGAGACCCTGGGGGCGGGGCGCA
A_73_113068,A_73_P447341,A_73_P327701|511654	0.000863752	4.92503e-06	up	1.68527	1.68527	0.752983	CHAF1B	Bos taurus chromatin assembly factor 1 subunit B (CHAF1B), mRNA [NM_001098014]	AGAGATATGTCACCTCTTGTATTTAGGATACTTTTTCCCTCGGAGATGTGAACATCTTAA///AGGAGACAGTACTTTGAGGTTTATTCCATTGGGTTTTAGTGTGTTGGATTATTTGATCAA///AATGTGACAAACACGACTTACGTTTTCTCCAGGAAAAATCTTAAAAGGCCCATCGCCCAC
A_73_P035941,A_73_P186382|515496	0.00211506	3.30302e-05	up	1.68526	1.68526	0.752969	SLC25A48	Bos taurus solute carrier family 25 member 48 (SLC25A48), mRNA [NM_001035309]	GTCAGTTTATCCTGTTACTGTAGCAAAGTGTTCCCTGCTTGAAATAAAACCCTTAGTATG///GAACTCCTGATCCACAGTCTGATTTCCATTATGATGTCATTAATCTAAATTTGACTTCTC
A_73_119751	0.011597	0.000847521	up	1.68431	1.68431	0.752158		Rep: Atherin - Homo sapiens (Human), partial (41%) [TC424121]	CCTTTTCTTTCTGTTCATTGTCGCTCCAGCTGGCCGTATTGCTTTTTAATATTGCACCGA
A_73_106264	0.00442214	0.000140144	up	1.68317	1.68317	0.751181		1372248 MARC 7BOV Bos taurus cDNA 5', mRNA sequence [DN536167]	TTCCTCTCCACCATGGCCCCTGTGTGGTGAAGCTCAACAGACATTGTTTTGGGGGGAAAA
A_73_100524,A_73_P491663|282134	0.00392888	0.000109491	up	1.683	1.683	0.751033	ADRA1A	Bos taurus adrenoceptor alpha 1A (ADRA1A), mRNA [NM_174498]	TTACTCCACAGCCTTTTCAACATGGCATAGAAAGGCTTTTCTTGGCAAATCACTTACCTT///AACGCTGGGCATCGTGGTCGGCTGCTTCGTCCTCTGCTGGCTGCCTTTTTTCTTAGTGAT
A_73_P067516|785418	0.00386877	0.000104616	up	1.68121	1.68121	0.749498	KCNK6	Bos taurus potassium two pore domain channel subfamily K member 6 (KCNK6), mRNA [NM_001205445]	TTAGTCACAGTCTACCTCTTCCTGGGCCTGGTCGCCATGGTGCTCTTGGTGCAGACTTTC
A_73_119702|538558	0.00291177	5.94807e-05	up	1.68087	1.68087	0.749208	BRI3BP	Bos taurus BRI3 binding protein (BRI3BP), mRNA [NM_001099087]	TGAGAATGCCGTGCTGCCCTTGTGTTTCGTGGTGGCCATCTACTTCATGACCGGTCCCAT
A_73_P166967	0.0326957	0.00463525	up	1.68074	1.68074	0.749095		Rep: Isoform 2 of Q8TE49 - Homo sapiens (Human), partial (42%) [TC468651]	TTCACCTCTGAAAACTTGCTTTGCCATAAGTGGGCTGTGGTCCCAGCGTGGTGTCTGGGG
A_73_117414|616252	0.0256591	0.00317838	up	1.68047	1.68047	0.748867	GIF	Bos taurus gastric intrinsic factor (GIF), mRNA [NM_001206239]	TGTTCCCACCTCAGCCTCCAACATCACTGTCGTCTACACCATAAGTAACCAGCTGAGGGG
A_73_101435,A_73_P255816,A_73_P451526|767617	0.00842675	0.000465949	up	1.68004	1.68004	0.748495	ST14	Bos taurus suppression of tumorigenicity 14 (ST14), mRNA [NM_001076538]	AGGGTGGGGTTCACTGTGTGTATTTGTGTGTATGAGTAAAACGCTTTATTTCTTTTTAAA///ACATGCAGGGACAAGTTCTGCAAGCCCCTGTTCTGGGTCTGTGACTCTGTGAAGGACTGT///TTCTTCAACGACTTCACCTTCGACTACGACATCGCGCTGCTGCAGCTGGACCGGCCGGTG
A_73_P477578,A_73_110387|107131855	0.000978849	6.8332e-06	up	1.67888	1.67888	0.747498	FBXO24	F-box protein 24 [Source:HGNC Symbol;Acc:HGNC:13595] [ENSBTAT00000004115]	ACGTCTTCATTCTTGACTACGCAGGGACCCTCTTCTTCCTCAAAAATGCCCTGGTCTCCT///CATGGAGAAGATGAAGGAGATCGTGGGCTGGATGCCCTTGATGGCGGCACAGAAGGATTT
A_73_P050806,A_73_P351606|100125761	0.0243123	0.00291126	up	1.67887	1.67887	0.747494	PLCXD1	Bos taurus phosphatidylinositol-specific phospholipase C, X domain containing 1 (PLCXD1), mRNA [NM_001105044]	GAGGTGATGATTAAAGGCGATGGTGTGATTTGTACAATCACATCTTCCAGGGAGAAAAAA///AAGAAGTCACCCATCTCCAGCAAGGAGCCGAAGCTGCTGCACCTTCTGTGCAAAGTGCTG
A_73_105415	0.000904531	5.67419e-06	up	1.67852	1.67852	0.747194		GB	CCATGGTTTTGGTTGGGGCGGTGTCTGTGCTGGTGGGACCATTCTCCTCAATTGTGGTGT
A_73_119671|281482	0.0106288	0.000715485	up	1.67813	1.67813	0.746854	DHRS3	Bos taurus dehydrogenase/reductase 3 (DHRS3), mRNA [NM_174180]	GAGATCCACAAATTCTCAGGAACCTACACCTGCATGAACACTTTCAAAGGGCGGACATAA
A_73_117923,A_73_P102486|282857	0.0018307	2.55137e-05	up	1.67723	1.67723	0.746079	SNCA	Bos taurus synuclein alpha (SNCA), mRNA [NM_001034041]	ATTTCGGTGCTTCCCTCTCACTGAATAAATGGTAGCAGGGTCTTTGTGTGCTGTGGATAT///GTCATGACATTTTTCTCAAAGTTTTCACAGTGTGTTTTGAAGTCTTCCATCAGCAGTGAT
A_73_113132,A_73_P127516,A_73_P054171|526872	0.0327921	0.00466276	up	1.67626	1.67626	0.745245	ANKRD29	Bos taurus ankyrin repeat domain 29 (ANKRD29), mRNA [NM_001102104]	CAATGACTTTGGAGTCCTTGGCTGTAATGTGATGTATATAAGTACACTGTGTTGCTGTTA///TTCAAATAGTGTTGGAAATTCCTGTAAGAAAGAAAATGCCCAGAACGCCCACCTGGGGTC///TGTTATAAAGGAGCTGCTGAAATTCTCACCCACCCTCGGTATTTTGAAGAATGGGACCTC
A_73_116584	0.000393677	6.76421e-07	up	1.67603	1.67603	0.745048		Rep: MRPL12 protein - Bos taurus (Bovine), partial (32%) [TC483965]	GGGCTGGCACTAAATCTTCACCTGGGACCTATGGGGGGCCCTTTGAAACCCCTTGTCTTT
A_73_P050656|618455	0.00189055	2.69553e-05	up	1.67505	1.67505	0.744201	LOC618455	Bos taurus keratin, type I cuticular Ha3-I-like (LOC618455), mRNA [NM_001083524]	TTGATTTGTCTTGCAGTCCCCCAAATCCCCTTGTTAACCTTCTAATAAACTTTCCTCTTG
A_73_P095606|512167	0.00236128	3.89711e-05	up	1.67479	1.67479	0.743978	HTR6	Bos taurus 5-hydroxytryptamine (serotonin) receptor 6, G protein-coupled (HTR6), mRNA [NM_001205717]	TTTCTTTGTGGCCAACATAGTCCAGGCCGTGTGCGACTGCATCTCCCTGGGGCTCTTTGA
A_73_P295326,A_73_P068081,A_73_114026|539607	0.00174185	2.34109e-05	up	1.6742	1.6742	0.743468	LRRC4B	Bos taurus leucine rich repeat containing 4B (LRRC4B), mRNA [NM_001192281]	TGGAGGAGCTCAACCTGTCCCACAACAACCTGATGTCGCTGCCCCACGACCTCTTCACGC///CACGAACCTCTGCTCTTCAAGAGCGGCTCCAAGGAGAACGTGCAAGAGACGCAGATCTGA///TCTTCAAGAGCGGCTCCAAGGAGAACGTGCAAGAGACGCAGATCTGAAGCCGGGGTTGGG
A_73_117883,A_73_P045286|518884	0.0201861	0.00213719	up	1.674	1.674	0.743304	TERT	Bos taurus telomerase reverse transcriptase (TERT), mRNA [NM_001046242]	ACGTTTACAAGATATTCCTGCTGCAGGCCTACAGGTTCCACGCCTGCGTGCTGCAGCTGC///ATCCTGTCCACCCTGCTCTGCAGCTTCTGCTATGGGGACATGGAGAACAAGCTCTTCCCT
A_73_105720	0.0147512	0.00129939	up	1.67357	1.67357	0.74293		PREDICTED: Bos taurus histamine receptor H3 (HRH3), mRNA [XM_867027]	CCGCACACCTGCCGTGCTGCCCCTGCAGACCCTGAAGTCCACACAGTAAAGTGTATTTTT
A_73_104228,A_73_P089581|517496	0.00405689	0.000116332	up	1.67325	1.67325	0.742654	ZNF777	Bos taurus zinc finger protein 777 (ZNF777), mRNA [NM_001192473]	GGATAGAACTTTATAATGACATTTTGGATACTGTGGTTCTATTTGATAATAATAGAGTAA///ACCTGGGGAACCCCCTTTGGGCTGTTCATTTCCTTGACAATAAAATGGATGAAACCAATC
A_73_109015|521831	0.0235977	0.00278144	up	1.6729	1.6729	0.742349	CRHR2	Bos taurus corticotropin releasing hormone receptor 2 (CRHR2), mRNA [NM_001192545]	TTTCTTTGTGTCTGTCTTCTACTGCTTCTTCAATGGAGAGGTACGCTCAGCTGTGAGGAA
A_73_P206137,A_73_P117471,A_73_P067086,A_73_P050666,A_73_111957|785475	0.0109541	0.000769175	up	1.67163	1.67163	0.741257	CDH11	Bos taurus cadherin 11 (CDH11), mRNA [NM_001081624]	ATTCACAATCCAAATTTCACAGTCAGAGACAACAGAGATAATACCGCGGGGGTGTATGCC///GGTTTAAGAAACTAGCGGACTTGTACGGTTCCAAAGACACTTTTGATGACGACTCTTAAC///AGTCAAGATTGCAGTAGAAGATGCTGATGAGCCCCCTATGTTCTTGGCCCCAAGTTATAT///GAGAGGATACATTTAATAAAACTGCAAGGACATCAAAGTGGTAAATACTGTGAAGTACCT///GCTTCTACTTTCATCTTAAACTAATATGTGCCAGATATAACTGTCTTGTTTCAGTGAGAG
A_73_P298906,A_73_107509|506054	0.0213139	0.00233302	up	1.6715	1.6715	0.741145	LRRC3	Bos taurus leucine rich repeat containing 3 (LRRC3), mRNA [NM_001098884]	AGGACGTAAAGCCAGGCAGTCCATCTAATGTGTTCCTTCCACTCTGGGAGCCTGTCCCAC///ACAACTCTTGTTTATTCTCAGAGTGTTTGTTAAGAGTAACACGTACCAAATTTCAGTCCA
A_73_P062476|784681	0.0168283	0.00161725	up	1.66985	1.66985	0.73972	LOC784681	Rep: Olfactory receptor MOR256-14 - Mus musculus (Mouse), partial (98%) [TC398143]	GATAAGAACAAACTAATGTCCCTTTCCTACAGTTTGGTAACTCCTATGCTTAATCCTTTT
A_73_108650	0.0334617	0.00482697	up	1.66964	1.66964	0.739538		PREDICTED: Bos taurus potassium channel tetramerization domain containing 12 (KCTD12), mRNA [XM_005194182]	CTCTTTTCCTCCCTGTGTGTGAAGTAATGAATCATTGATTATGTGACTTGTTATGTATTC
A_73_103446|521475	0.0124535	0.000961419	up	1.66921	1.66921	0.739164	FGF19	fibroblast growth factor 19 [Source:HGNC Symbol;Acc:HGNC:3675] [ENSBTAT00000022973]	TTTCTTTCTGCCCCTGAAAACAGATAGCATGGACCCTTTCGGGCTCGCCACCAAACTGGG
A_73_120673|525643	0.0248601	0.00302469	up	1.66741	1.66741	0.737606	OTOP1	Bos taurus otopetrin 1 (OTOP1), mRNA [NM_001206784]	CCTTTTCTATTTTCTACCGAATGCACGCAGCTGCCTCCCTTTTCGAGGTCTATTGTAAGA
A_73_P511028	0.049255	0.00883543	up	1.66411	1.66411	0.734754			TGAATGCTAAGAAAAAGCTCGTGACTCCCCATCACACCATGCCACTTTCCCGGGAGCCGC
A_73_100258	0.0219321	0.00244108	up	1.66304	1.66304	0.733826		Rep: Homeobox protein Hox-C6 - Homo sapiens (Human), complete [TC404592]	GCTGTATTTGTGGTCTCTGTATTTATATTTATGTTTAGCACCGTCCGTGTTCCAATCCAA
A_73_P110526,A_73_102246|509101	0.0308445	0.00422156	up	1.66274	1.66274	0.733562	TMEM125	Bos taurus transmembrane protein 125 (TMEM125), mRNA [NM_001046023]	AAGAGAAACAGTCATGGTCATCGATTGTTAGGATCCAATGACATGATGTGTGCAAGGGCC///ATGGTTAGGATCCAATGACATGATGTGTGCAAGGGCCGGGCCCGTGGCAGGTGTGCAATA
A_73_P102521,A_73_P356916,A_73_103367|326577	0.0201861	0.00213028	up	1.66254	1.66254	0.733393	SLC1A4	Bos taurus solute carrier family 1 member 4 (SLC1A4), mRNA [NM_001081577]	AAGTGCATTGAAGAAAACAATGGTGTAGACAAGAGGATCAGCCGGTTCATTCTCCCCATC///TTGGGCCATTTTATTCACGGAGGAATTGTTCTGCCACTTATTTATTTTGTCTTCACGAAA///GCTGTTCATCTCTTTTCAATATGTGACACTTGCCTTAAAACATAGCAGTCTTCAAAATGA
A_73_104756	0.0138212	0.00115075	up	1.66246	1.66246	0.733317		Rep: Transcription factor COE4 - Homo sapiens (Human), partial (40%) [TC481805]	CCCGATAGAACCATGGGTCCAGCTGCCCCTGGCCTCATGTTCTGCTGAGGTTGGAAAAAA
A_73_P121696,A_73_P303241,A_73_108996|505696	0.00272458	5.11835e-05	up	1.6623	1.6623	0.733181	PTPRB	Bos taurus protein tyrosine phosphatase, receptor type B (PTPRB), mRNA [NM_001205297]	CATGCCCTATGGAGGTGCCAGCTATTTCTGTTGATATTATGTATAATTTATTAATCTGGA///TTAATTGGCATGCTCGTTGCTGTTGTTGCCTTATTCATCTGCAGACGGAAAGTCAGCCAT///AGTTGTAATTTGTAGTTTCTTCTGTAAATATGTATTTTTCATAATGTTTAATATTAAGCT
A_73_P045411,A_73_104494,A_73_P425651|281581	0.0137183	0.00113782	up	1.66091	1.66091	0.73197	YARS	Bos taurus tyrosyl-tRNA synthetase (YARS), mRNA [NM_174220]///tyrosyl-tRNA synthetase [Source:HGNC Symbol;Acc:HGNC:12840] [ENSBTAT00000024051]	AACTGTGGGATTTGAAAAGTGGAGGGAAGGGAAAACAGAGAACCTAGTGGTCTACCAAGT///GAGGGTGGGGTACTTCTCCATAAGCCATCTCAGAACCACTAAATGTCGCTGTCATAAATT///AAAGTCATTAGTGTGGACAAGCACCCAGATGCAGACAGCCTGTATGTGGAGAAGATTGAT
A_73_P073961|529876	0.00470228	0.000158666	up	1.66077	1.66077	0.73185	WDR37	Bos taurus WD repeat domain 37 (WDR37), mRNA [NM_001205968]	AATTCCATAAAATTTCATCCATCAGAACAGTTGGCCCTCACCGCCTCTGGAGATCAGACT
A_73_115478	0.00147534	1.68433e-05	up	1.6605	1.6605	0.731615		Rep: 60S ribosomal protein L28 - Bos taurus (Bovine), partial (92%) [TC472774]	TTAGGTCTCTGTGGTTTCTCATCGCCTTGTCCCCTGTAGTGAGTCTCGGCCGCCTGAGTT
A_73_111877,A_73_P406171,A_73_P407296|100124502	0.00711797	0.000342317	up	1.66027	1.66027	0.731415	KCTD7	Bos taurus potassium channel tetramerization domain containing 7 (KCTD7), mRNA [NM_001102545]	GGTTTGTGTATACCGTATAATGCTACCTGTGTTCCTTCATTTTCCTGTCTGTGAGCACTT///TTTGCCAAGCTCAAGGTCTGTGTCTTCAAGGAGGAGATGCCCATCACCCCCTACGAGTGC///TTTGGAGAGAAAAAGATCCAGCAGCTTCTCCTCCACTGTGTTTCCTTCTTGCTACAAGTG
A_73_114165	0.0141875	0.00121236	up	1.66012	1.66012	0.73129		solute carrier family 6 member 18 [Source:HGNC Symbol;Acc:HGNC:26441] [ENSBTAT00000016676]	AACCTGGAAGGTCGTGAGCCCCCTGCTGCTGCTGACCATCTTCCTGGCCTATGTTGCCCT
A_73_P433346,A_73_P326706,A_73_101531|514339	0.0234169	0.00274315	up	1.66011	1.66011	0.73128	SLC6A12	Bos taurus solute carrier family 6 member 12 (SLC6A12), mRNA [NM_001101994]	TGTGGTCTTCTCCATCCTGGGCTTCATGTCCCGGGAGCAGGGGGTGCCCATCTCTGAAGT///TCTCCTGCCTTGTTAACAAGCCCCATGGAGCGCTTGCTGCATGTGCCAACCTTTAAAAAA///CCTGGCCACTTTTTTCTTCTCCTTGAGCAAGTACACACCTCTCAAATACAACAACGTCTA
A_73_101587,A_73_P449246,A_73_P065726|281413	0.0383091	0.00593287	up	1.65953	1.65953	0.730777	PNMT	Bos taurus phenylethanolamine N-methyltransferase (PNMT), mRNA [NM_177505]	CCAATGGCCCTCACCCGCCTAGACTCCCTGTTGTCCGAGGTGGCCTCAATAAAGGAATAA///CGCTGCTTGGCTCAGACCTTCGCCACCGGTGAGGTGTCTGGCCGCACCCTCATTGACATC///AGGTGTAGACGATGTCAAGGGCATCTTCTTCACCTGGCCCAGAAGAAGGTGGGGGTGTGA
A_73_P050081|527114	0.00328927	7.62346e-05	up	1.65922	1.65922	0.730501	AGT	Bos taurus angiotensinogen (AGT), mRNA [NM_001114082]	AAGGAAAGATGAAGGGGTTCTCCCTGCTGCCAGGGCTCAAGGAGTTCTGGGTGGACAACA
A_73_P114756,A_73_P443626|615501	0.0270415	0.00343723	up	1.65918	1.65918	0.730474	SH3RF3	SH3 domain containing ring finger 3 [Source:HGNC Symbol;Acc:HGNC:24699] [ENSBTAT00000055080]	CTCCCGTGGGCGAGGTGTACACAGTGCTTCTCGCCTTGCTACCATGGTCCTGCTCTCGTT///ACTGCTATACGTGGAGCTCAATGATGCCGCCAAGCAGCTGATGGAGATGGACAAGCTGGG
A_73_P287146	0.0470506	0.00822263	up	1.65899	1.65899	0.730303		PREDICTED: Bos taurus protein kinase, AMP-activated, gamma 2 non-catalytic subunit (PRKAG2), mRNA [XM_002704191]	TTTGCCATGCCGCTCCTGGATGGAGACCTGGAGAGTTCAGAAAAGCCTCCGTCTCGTAAG
A_73_109895	0.0031561	6.9051e-05	up	1.65875	1.65875	0.730096			AAGGCTGTTGGGGTCTCCATTGACTGCTCCAAGTGTCATAACCAGCCTTGCGTGAGGGAA
A_73_P493118	0.0200916	0.00211378	up	1.65871	1.65871	0.730065		GB	TTATGGTTGATACAGACCTCTAATGTTTTGGGTTCCTGTTTTCCCACCATTTCCCCTTTC
A_73_P079151	0.0481474	0.00851359	up	1.65802	1.65802	0.729464			TATAAACCTAAACTCCCAAAACCTGTCAGTGATAGTGTTCCGCATCCTCCTCCTGAAGGT
A_73_P327771,A_73_P044906,A_73_P323816|513605	0.0400872	0.00637354	up	1.65666	1.65666	0.728276	GTPBP2	Bos taurus GTP binding protein 2 (GTPBP2), mRNA [NM_001083421]	TAAGTCCTCTCTTGTTTTAGTAGTTTGCAGTGAGCATCCCTTTCCCTCTGTTGCAGGGAA///GGACTCAGGGATTTGGTTGAGGTTTCTCTGCGTGTATGTATATATATATATATATACACA///AGTCTTTCTGAATATTTTGCCTCCACTCACCAATAGCAAAGAGCAGGAGGAGCTCATGCA
A_73_P110126,A_73_107361|281711	0.00303608	6.39284e-05	up	1.65649	1.65649	0.728133	CPLX2	Bos taurus complexin 2 (CPLX2), mRNA [NM_174283]	ACCTCACTCCCAAGTTGCTTGAAAAGAAGAAGACAGCTTCTCTCCAACAGGAGGTGTTAA///TGTGGTGATGCCCATACATTCCTTCATGCGCCCCACTGCCAGGAGGACCACTGTCCCAGC
A_73_P048526|528459	0.00896795	0.000518764	up	1.65634	1.65634	0.728001	KRT85	Bos taurus keratin 85 (KRT85), mRNA [NM_001075913]	ATTATGACTGTCTGTGGGTGCCGTGCCTTCTGGGTTGCCTCAATCTGTGTTTCAATAAAT
A_73_100155	0.023577	0.00277472	up	1.65593	1.65593	0.727642		Rep: Taste receptor type 2 - Bos taurus (Bovine), partial (26%) [TC431839]	ATGTTGAGGAGTCTATGTAAAGAGGAACCGTGGGCAGCTTCTAGAAACTTTGGGCAACTT
A_73_P092586|524042	0.00289724	5.87413e-05	up	1.65554	1.65554	0.727302	GJA8	gap junction protein alpha 8 [Source:HGNC Symbol;Acc:HGNC:4281] [ENSBTAT00000029102]	TTATTTCCCTTTGACGGAGGTGGGGATGGTAGAGGCCAGCCCCCTTTCTGCCAAGCCTTT
A_73_106633	0.000863752	4.97541e-06	up	1.65526	1.65526	0.727061		Rep: Cytochrome b - Aleyrodes proletella, partial (10%) [TC416162]	CATCTTGGATGTTTTGTTCTGCTGCTCTTCAATATCGTATCAATGCCAGGAAGGGGGCGC
A_73_115056|504851	0.0073488	0.000366638	up	1.65447	1.65447	0.726368	BOK	Bos taurus BOK, BCL2 family apoptosis regulator (BOK), mRNA [NM_001098868]	GTGGCTCCTGATCTACTTCTGGGGGAATGTGTGCCCCCATGCGTGTGTCGGGTTCCCCAT
A_73_100637	0.00975595	0.00060478	up	1.65427	1.65427	0.726192			GACTTAAGTCCTCCTCTCTGGGTTCTTCAATTATGTTCAGTAATAGGGGAGAGGCTGGAT
A_73_101704|510430	0.00108885	9.02179e-06	up	1.65379	1.65379	0.725775	RTP1	Bos taurus receptor transporter protein 1 (RTP1), mRNA [NM_001192256]	CAATTTCTTCTCCATCCCCTGGTGCTTGTTTTGGGCCACGGTCCTGCTGCTGATCATCTA
A_73_102332	0.020355	0.0021684	up	1.64999	1.64999	0.722457		GB	TCAACCCCTTTATCCTCACCCTCCACAATGAGACGTTCAAGGCTGTGCTACGAGGCCAGA
A_73_P417511	0.0431125	0.00714427	up	1.64844	1.64844	0.721104		Bos taurus hemoglobin, gamma 2 (LOC788610), mRNA [NM_001110509]	CCAACTGAATATGGAAAAATTATGAAGCTTTTGTGCATCTTGCCTCTGCCTAATAAAGAC
A_73_101008	0.0164938	0.00156247	up	1.64757	1.64757	0.720344		Rep: Peptidase A24A prepilin type IV precursor - Anaeromyxobacter sp. K, partial (15%) [TC435680]	TGTGTTTTTAATCTTCAACACTTGGTGCAATAGAAGCTGCAAAGATGTGCCACTTTATCT
A_73_P061076|783205	0.01599	0.00148442	up	1.64707	1.64707	0.7199	LOC783205	GB	CATTGTAGTTACTAGCTTAACAGTCCTAATTTCCTATGCCTTCATCCTGTCCAGTATCCT
A_73_P491188	0.00405689	0.000116299	up	1.64695	1.64695	0.719793			CTGCGGCGTCTGCCGTCGTCTTGCCCTCGTCCCCTTTTTCTAACTGAAAAAGCCTGGTGA
A_73_P049291|505624	0.0403135	0.00642175	up	1.64693	1.64693	0.719782	FBXL21	Bos taurus F-box and leucine rich repeat protein 21 (FBXL21), mRNA [NM_001034252]	CCTCCCTGTCCAGCTATGGCCTCTTAAATTGACCACTTACCTTGTTCTTTCATTAAATTA
A_73_P068391	0.00750599	0.000381462	up	1.64676	1.64676	0.719633		calcium voltage-gated channel auxiliary subunit gamma 8 [Source:HGNC Symbol;Acc:HGNC:13628] [ENSBTAT00000009879]	AGAAGAACCACTACTCATACGGCTGGTCCTTCTACTTCGGCGGGCTGTCGTTCATCCTGG
A_73_P491938	0.0018081	2.51298e-05	up	1.64589	1.64589	0.718868			ACTTCGTCCTCCTGCTCTCGGGCGTCTGCTGCCTCTACTCGCTGTTCAACGTCGTGTCCA
A_73_P030376|618946	0.0211885	0.00231302	up	1.6437	1.6437	0.716946	IFNB3	Bos taurus interferon, beta 3 (IFNB3), mRNA [NM_001114297]	GTGCAAATACTCACGAACTTTTCTTTCCTGATGAGACTAACAGCTTCCCTCCGTGACTGA
A_73_110163|522046	0.00557492	0.00021743	up	1.64272	1.64272	0.716083	HMX3	H6 family homeobox 3 [Source:HGNC Symbol;Acc:HGNC:5019] [ENSBTAT00000045429]	CACCTTCCCGCACCCGGTGTACTACTCGCACCCGGTGGTCTCGTCCGTGCCGTTGCTCCG
A_73_P122656,A_73_P453656,A_73_P112786,A_73_120906,A_73_110402|534328	0.00850182	0.000472927	up	1.64263	1.64263	0.716004	CADPS	Bos taurus calcium dependent secretion activator (CADPS), mRNA [NM_001076020]	AGAGTCCAGTGATGCTTCATTAATGTGCTGTGTGTGCGCGTTGACAGTAAATGGATATGA///AACGCCTAACTTTGGATCACAGACTTAATGATTCCTATTCTTGCCTGGGCTGGTTCAGTC///TATGGTTGATGCCAAAGCTCAATCAACAAAACTTTGCAGCATGGAAATGGGCCAAGAGCA///AGATTTCCGATTGCAAGGAGTCCTGGACTCAACCTTAAACAGCAAGACCTACGAAACCAT///ATCCATCTTGCTTTTGCCTTATATAAAGCCTACAGTTATGAAAGTGCGGAAAACTGTGGC
A_73_P102796,A_73_P137086,A_73_106624|414347	0.0175873	0.0017251	up	1.64217	1.64217	0.715604	CCL4	Bos taurus chemokine (C-C motif) ligand 4 (CCL4), mRNA [NM_001075147]///LB02738.CR.1_B23 GC_BGC-27 Bos taurus cDNA clone IMAGE:8623993 5', mRNA sequence [EH207464]	CCTCTCCATGCTCACGACTCCCCTCAGCAGATCCTGTTCCTTCTCTTAATTTAATTTTTT///TAGAAGCTAAAACGAAGAGCTCCTTGTAGAACTTCGGTCTTACCTTGGCCTTTCTTTCCA///TCCCTCTGCTACTGTGAATACATGGATAATGCAACTGATTTCAAGTGTTTTTGTAATAAA
A_73_105575,A_73_P043051|616608	0.00882779	0.000501321	up	1.6411	1.6411	0.714661	DNAJC5G	Bos taurus DnaJ heat shock protein family (Hsp40) member C5 gamma (DNAJC5G), mRNA [NM_001076429]	ATAGTTGTTGGTTCAAGACACTTGTCCTCCTGTGTGCTCTACTCACCTGTTGCTGTTGTT///CTCTCCTGACTGGGAGAAGGGCTAAGGAATATCAGTCAATAAAAGAGCTTTTTAAAATCC
A_73_P309431	0.0256899	0.00318499	up	1.63885	1.63885	0.712681		NAC alpha domain containing [Source:HGNC Symbol;Acc:HGNC:22196] [ENSBTAT00000010646]	AGAAGAAGAGGAGCTGACAGCATCTTCACATCTGCAGGACGCAGGTCTCCCCTTGGTCCA
A_73_111697|522074	0.0110423	0.000784059	up	1.63859	1.63859	0.712457	CD70	Bos taurus CD70 molecule (CD70), mRNA [NM_001319881]	TCGCGGGGACATTCTCTGCACCAACCTTACTCTGCCTCTGTTGCCTTCCAGAAACGCTGA
A_73_P129066|100298868	0.0320844	0.0044972	up	1.63828	1.63828	0.712179	LOC100298868	LB0292.CR_C05 GC_BGC-29 Bos taurus cDNA clone IMAGE:8284735, mRNA sequence [DV916505]	CAGCACCATTTTCTTCGTCTCTGGCATCTGCACTCTCCTGCAAGTATTTTTAGGAATCAG
A_73_115593|100847827	0.0415902	0.00674591	up	1.63809	1.63809	0.712011	LOC100847827	PREDICTED: Bos taurus uncharacterized LOC100847827 (LOC100847827), misc_RNA [XR_001495242]	TGGAGAAGGGGGCTGCACTGTCTGTGGGAGGTCCTCCTTAAAAAAGAATTATTTTGTACA
A_73_112920	0.0442379	0.00746322	up	1.63543	1.63543	0.709669		Rep: Formyl transferase domain protein - Psychromonas ingrahamii (strain 37), partial (5%) [TC414870]	TTGGGTTTTCATTTCTTGATTGTTTCAAGGTGTCTTGGGGATGACTTGCCCTTAAATAAC
A_73_P089221	0.0247391	0.00300006	up	1.63453	1.63453	0.708872			TGTGCCAGCAGTTACTCCACGGTGCTGCACGGCCACCTCCTTTCTATGCAAAAAAGCAGG
A_73_P205059	0.0261324	0.0032668	up	1.63437	1.63437	0.708731		LB00459.CR_C03 GC_BGC-04 Bos taurus cDNA clone IMAGE:8049821, mRNA sequence [DT841329]	CCTTCTAAAGAAAATCCATCTGGTCTCTCTTTCTAGTTTCCTATGGTGCACTGAGGTACT
A_73_P494948	0.0172764	0.00168335	up	1.63414	1.63414	0.708532			TAAACGCCGAAAGTTCCAGATTCCTTCGGAGTCTTGTCTCCCCTTCCGGGTGGATTCCCC
A_73_P485353	0.0178353	0.00176106	up	1.63388	1.63388	0.708298		GB	TTTGTGTTGTCTGTCTCTTCTATGGGACTATCATTGGGGTCTACTTCAACCCTGCATCCA
A_73_112591|522374	0.00159268	1.93384e-05	up	1.63328	1.63328	0.707768	PAQR9	Bos taurus progestin and adipoQ receptor family member 9 (PAQR9), mRNA [NM_001077951]	CACCGTGGGCTACATGCTGCTGCTGGTCGTCTGCCTGGGGCTGGTCATCAAGAAGTTCCT
A_73_P487648|617449	0.00719379	0.000353784	up	1.63258	1.63258	0.707151	CLDN9	PREDICTED: Bos taurus claudin 9 (CLDN9), mRNA [XM_002697935]	TCACCCAAATAGCAGTAGCTCCTTATGCCTTCTCTGGCCTGGAGTTGGCCCTCTCTGCCT
A_73_P158932	0.000864163	5.11536e-06	up	1.63152	1.63152	0.706217		LB00528.CR_D18 GC_BGC-05 Bos taurus cDNA clone IMAGE:8017988, mRNA sequence [DT856843]	TTTTCCCCTTCCTCTTCCTCTAGTGTTTGGGGTCATCTCTCAAGTAAATTGCTTGCATTC
A_73_P054685	0.030398	0.00412711	up	1.63125	1.63125	0.705978		Rep: olfactory receptor Olr418 - Rattus norvegicus, complete [TC399411]	CAGTCCTGACCTCCATGCTCAACCCTTTCATTTACAGTCTGAGAAACAAAGACATGAAGA
A_73_P147841,A_73_P069641,A_73_P321841|505486	0.00320387	7.16865e-05	up	1.63119	1.63119	0.705925	ASPG	PREDICTED: Bos taurus asparaginase (ASPG), transcript variant X1, mRNA [XM_015459304]///Bos taurus asparaginase (ASPG), mRNA [NM_001305013]	CTCCACTCCTTCTCCAGAGACCTACCTTTTCCAGGAAGTGCTGCCTGGTGTCTAACCTGA///TCAGGCTTCGACATGACGTCTGAGGCAGCACTGGCCAAGCTGTCCTATGTGCTGGGCCTG///TCTTCCAGAATCAGCTGTTTCGGGGCAACCGGGTGACCAAAGTGGACGCGCGCAGGTTCG
A_73_121416	0.00174185	2.31111e-05	up	1.63096	1.63096	0.705719			TATATACACAAATGCACAGGTCCTTTCCCTAGTCCCTTACCTAACTGTATGTCTCATCAT
A_73_113436|504839	0.00944837	0.00056981	up	1.6309	1.6309	0.705671	PELI3	Bos taurus pellino E3 ubiquitin protein ligase family member 3 (PELI3), mRNA [NM_001191486]	CGTTCCACGCCGCCTGCCCCTTTTGTGGGGCCTGGCTCACCGGCGAGCATGGCTGCGTCC
A_73_104078,A_73_P414976,A_73_P355761,A_73_P264316|100125231	0.0191798	0.00197144	up	1.629	1.629	0.703989	MAGED4B	Bos taurus melanoma antigen family D, 4B (MAGED4B), mRNA [NM_001103311]	TGACACACTCTATGCCCTTCCTGCTTTCATTGTGTGCTTTTCTCGTGCTGTCGTGTTTTG///TTACAGAGGACTTTGTGAAGCAGAAGTACTTGGAATACAAGAAGGTCCCCAATAGCAGCC///AATACAAGAAGGTCCCCAATAGCAGCCCACCCGAGTATGAGTTTCTCTGGGGTCTGCGCG///TGATGAAGTCGGGGAGGAAGACATGGTTGAAGGCAACGACTATGAAGAATTTGGTGCTTT
A_73_119617,A_73_P356271|509748	0.0158389	0.00146028	up	1.62851	1.62851	0.703548	LPAR2	Bos taurus lysophosphatidic acid receptor 2 (LPAR2), mRNA [NM_001192235]	CAGTGGAGAAGTATTTCCTACTCTTAGCCGAGGCCAACTCGCTGGTCAACGCCGTGGTGT///TTCTTCTACAACAACAGTGGCAAGGAGCTCAGCTCCCACTGGCGGCCCAAAGATCTGGTC
A_73_100530|101904771	0.0493396	0.00886379	up	1.62753	1.62753	0.702682	TAS1R3	PREDICTED: Bos taurus taste 1 receptor member 3 (TAS1R3), mRNA [XM_010813443]	TGCCTAAGTGCTACCTGCTGCTGTGGCGGCCAGACCTCAACACCCCCGAGTTCTTCTTGG
A_73_P254336,A_73_101243,A_73_P082271|506264	0.00207061	3.17825e-05	up	1.62747	1.62747	0.702632	CRIM1	Bos taurus cysteine rich transmembrane BMP regulator 1 (CRIM1), mRNA [NM_001205298]	TTGTCCATTCGGATACCTGAAGAATAAGCACGGCTGTGACATCTGTCGCTGTAAGAAATG///CGTTTCCAGGGCTACACTTCCTTGTTGTCGCTTTCTTCTGTTCTGATGTTGGTTGTTCAT///AGTCTGCTTTTTAAAAAGTAAACTCGAATTCGTGCACTTGCTTAGTGGATTGTATTGGAT
A_73_116694|507598	0.0478154	0.00841707	up	1.62686	1.62686	0.702093	LPAR5	Bos taurus lysophosphatidic acid receptor 5 (LPAR5), mRNA [NM_001034304]	CGCCAGAGACGGCCGCAACGTGTCCCTCTGCTTCGAGAGCTTCAGCGACAAGTTGTGGAA
A_73_P346761,A_73_P051206|527239	0.0255068	0.00314715	up	1.62654	1.62654	0.701806	JAKMIP2	Bos taurus janus kinase and microtubule interacting protein 2 (JAKMIP2), mRNA [NM_001075897]	AACATCATCCATGGCCTCATTTAGAACAGACCGAACACCAGCTACTCCTGATGATGACTT///TGGGGATCGAAGCACGAGGAATACCTATGAGGAGCTGTTTACAATAAAATGTTTGATTTG
A_73_102984|511385	0.0206176	0.00220986	up	1.62625	1.62625	0.701551	NEURL3	neuralized E3 ubiquitin protein ligase 3 [Source:HGNC Symbol;Acc:HGNC:25162] [ENSBTAT00000003862]	ACCAGGTTGCCAACACCTGCCTAGTCCCCTGTGGCCACACACACTTCTGCAGCTCCTGTG
A_73_P075041|522679	0.041127	0.00662995	up	1.62615	1.62615	0.701457	CLDN25	claudin 25 [Source:HGNC Symbol;Acc:HGNC:37218] [ENSBTAT00000052971]	TGTTTTCCTGGCCCTTGGTGGGTTACTCCTCGTCTTCTCAGCCTGCCTGGGAAAAGAAGA
A_73_P056761,A_73_110152|788703	0.0385418	0.00600228	up	1.62526	1.62526	0.700673	LOC788703	Bos taurus olfactory receptor, family 52, subfamily J, member 3-like (LOC788703), mRNA [NM_001206686]	ATTTGATTATCCCACCCTCACTCAACCCCATCATTTATGGTATAAAGACCAAACAGATAT///TCAACCCCATCATTTACGGTATAAAGACCAAACAGATATGGGAGCCTGTACTCCGTGCAT
A_73_115027	0.00324691	7.36879e-05	up	1.62389	1.62389	0.699457		Rep: Flagellar motor switch protein - Bacillus pumilus (strain SAFR-032), partial (6%) [TC465166]	CTCCCCCTTCCTCTGATCCCTTGGAATTGTTCCCATAAATTCACAGGTGCAAAATAAAAA
A_73_110808	0.00660326	0.000300286	up	1.62388	1.62388	0.699449		Rep: Relaxin receptor 2 - Canis familiaris (Dog), partial (25%) [TC480996]	CCCTTCGCATCTGGTCCCCTCATCTAAGGAAAGAAAATAAGCTCTGTCATCCTTTCTTTT
A_73_102303	0.00887936	0.000511223	up	1.62342	1.62342	0.699033		GB	AACTTCTCTTTGGGGTCTCCCAAGGCCCCTGAAGACATCGACCTCACACCCAGGGAGAAT
A_73_103221|504476	0.000309176	3.53126e-07	up	1.62321	1.62321	0.698847	ACTL6B	Bos taurus actin like 6B (ACTL6B), mRNA [NM_001083370]	CTTTTGTTCCCCTCCCCACTTGTCCTCTTGATTGTGAAGTTTCCGGGTTAAATGGAGTAA
A_73_116637,A_73_P259846,A_73_P271901,A_73_P474528,A_73_P043646,A_73_P476678,A_73_P417181|280781	0.00114366	1.01407e-05	up	1.62311	1.62311	0.69876	ELN	Bos taurus elastin (ELN), mRNA [NM_175772]	TGTCCTGGACATTTGGGGATTATTTTTGATTGTTGATGTTCTTTCATTTTACTTGTGTGG///TCTCCAGCTGCAGCTGCTAAAGCAGCCAAATTCGGTGCCGCTGGCCTCGGAGGTGTCCTA///TCTCCATCTCTAGGGGAACTTGGTGCTACATGCTGGTGCTCTGACTCTTCCTGCAGGGAG///AAATTCGGGGCCAGAGGCGGAGTGGGAGTTGGAGGCATTCCCACATTTGGGGTTGGCCCT///CCGCCCATCTCTATGTGTCTCGCTGTGATAGATCAATAAATATTTTATATTTTCTCCTGG///TCTTGGAGGCCTGGGAGTAGGAGCACTGGGCCCTGGAGTCAAACCAGCTAAGCCAGGTGT///TATGGACTGCCCTACAGCACG…
A_73_101054,A_73_P377061,A_73_P440986|512531	0.0228281	0.00261228	up	1.62275	1.62275	0.698445	MARS	Bos taurus methionyl-tRNA synthetase (MARS), mRNA [NM_001038091]	ACTTATCATAGAAAGTCACTTTAATGGATATGGACAATAATAAATAAATGTACAATCTAA///TGTGACAAGTGTGGCAAGCTCATTAATGCCATTGAGCTCAAGAAGCCTCAGTGTAAAGTC///ATGTTTGTGTCCAAGTTTTTTGGGGGTTTTGTGCCTGAGATGGTGCTCACCTCTGATGAT
A_73_103135	0.00437433	0.000137794	up	1.62207	1.62207	0.697838		Rep: Lipoma HMGIC fusion partner precursor - Mus musculus (Mouse), partial (36%) [TC417600]	AGGAGAGACATTCTCCAGTCATTAGATCTTGTTTTCTTTCGTCCATTATTGTACTATGCT
A_73_119147	0.0485181	0.0086273	up	1.62197	1.62197	0.697749			TTCCCAGGCCCTGGCTTGTGATTAGTTTCCTTGCATCCATCCTGCAATGCATTTGTTATA
A_73_P034561|100336102	0.023327	0.00271302	up	1.62148	1.62148	0.697314	UPK3A	Bos taurus uroplakin 3A (UPK3A), mRNA [NM_174709]	ACAGGTTCAAGTACGTCCTGGTCAATATGTCCTCGGGCTTGGTGCAGGACCAGACCCTGT
A_73_P136111|617545	0.0108144	0.000745076	up	1.61912	1.61912	0.695209	TMEM240	Bos taurus transmembrane protein 240 (TMEM240), mRNA [NM_001206963]	ATCTAATGTTGGGGCTGCTACTCGGCTTCTGCATCAGCTGGTTCCTGGTGTGGATGGACG
A_73_119338|617274	0.0260903	0.00325854	up	1.61909	1.61909	0.695188	ERMN	Bos taurus ermin (ERMN), mRNA [NM_001034799]	ATGTAGTTCTTTTTGTGTCTTTCTTCCTGTACCTTGAGGGGAATAGAAAGTCTGGTATCA
A_73_P165552	0.0349495	0.00515041	up	1.61767	1.61767	0.693916		collagen type XXVIII alpha 1 chain [Source:HGNC Symbol;Acc:HGNC:22442] [ENSBTAT00000033859]	ATTTCGAAGCCTACCTCTTTCATATTTTGGGTTCCTCACCGCTTCAACCTGGATTTGGGA
A_73_P416781	0.0341307	0.00497735	up	1.61755	1.61755	0.693814		family with sequence similarity 129 member C [Source:HGNC Symbol;Acc:HGNC:24130] [ENSBTAT00000025214]	ATTTGGCAACGATGACGTGACCCTAGGTTCCGACGCTGAGGTGCTGACCTCGGTACTGAT
A_73_P495398	0.0255068	0.00314666	up	1.6159	1.6159	0.692339			TACCAGTGTCTTCAGTATCATGTGGAAAAGACCTTTTTATTCTCATCACAATTAGAGAAC
A_73_P087686|100337226	0.0481986	0.00853367	up	1.61542	1.61542	0.69191	EPHA5	EPH receptor A5 [Source:HGNC Symbol;Acc:HGNC:3389] [ENSBTAT00000039576]	AGAGATTTTCATGGAAAATGGATACAGTTCAATGGACGCTGTGGCTCAGGTGACCTTGGA
A_73_104731,A_73_P287386|532363	0.0362623	0.00543702	up	1.61539	1.61539	0.691885	ARHGAP39	Bos taurus Rho GTPase activating protein 39 (ARHGAP39), mRNA [NM_001205997]	GGTCATCTTTGAGAACACTCGCAAGGAGATGTCCTTCCTGCGCGTGCTCATCCAGCACCT///ATGCCATGTCCTGGTCTAGCCAGCAGGACACCATGTCTTCCACGGGCTACTCCCCCAGCA
A_73_P125731,A_73_P093831|524030	0.0448126	0.00763816	up	1.61532	1.61532	0.691816	GJB5	Bos taurus gap junction protein beta 5 (GJB5), mRNA [NM_001205907]	GTTCAAGGCCGGTGTGGATGCCACCTTCCTCTACGTGTTCCACTCCATCTACCCCAGATA///TCTTCCAAACAGGGCGATCTCCTCTCAGGCGACCTCATCTTTCTGGACTCAGATGTTCCC
A_73_P333076	0.0104775	0.000691193	up	1.61448	1.61448	0.69107		Rep: ADAMTS-like protein 5 precursor (ADAMTSL-5) (Thrombospondin type-1 domain-containing protein 6). - Canis familiaris, partial (34%) [TC442180]	AACCTCTTGCTCCTGCTGTGGACCTTCCTGAATTGTGGTTTGGGGGGCAACGCTCAGTAG
A_73_P086541|617708	0.0396733	0.00628047	up	1.61371	1.61371	0.690385	SLC18A1	Bos taurus solute carrier family 18 (vesicular monoamine transporter), member 1 (SLC18A1), mRNA [NM_001193171]	GTACCAGCTTACTTTGTGTTCCTCTGGCTCATGATATTTTTGGTCTCATTGGCCCCAATG
A_73_106971|107131743	0.00638613	0.000280147	up	1.61257	1.61257	0.689366	LOC107131743	PREDICTED: Bos taurus butyrophilin subfamily 2 member A2-like (LOC107131743), mRNA [XM_015459965]	TGAGGCCCTTCTTCAGGCTGGGGTCCGATGACAGCCCCCTCTGTATCTGTCCATCTTTTA
A_73_P076748|784897	0.0129702	0.00102415	up	1.61245	1.61245	0.689255	LOC784897	GB	TGAGATTGTGTTTTTCATTTTGGCAGGCTTCAATATCATCTCTTCTGTCCTGATCATCTT
A_73_P346706,A_73_108537,A_73_103543|614077	0.0071977	0.000354801	up	1.61213	1.61213	0.688965	PTPN7	Bos taurus protein tyrosine phosphatase, non-receptor type 7 (PTPN7), mRNA [NM_001040576]///tyrosine-protein phosphatase non-receptor type 7 [Source:RefSeq peptide;Acc:NP_001035666] [ENSBTAT00000003923]	AGACACTGGCTCTTGAGCACTGGCCACTGCCCCCTGCCCCCAGTGGACACAGGGGCGACC///TGCCCCAACCCTGTCCAGACACGAGGACAGGCCGTGGAGAATAACAGGTGGGGAAATAAA///TGGGGAACAACAGAAGACAGCGAGAAGACCCGAGGTGCCCAAGGGCAGAAGGCTGCCCAA
A_73_101865	0.00421904	0.000126781	up	1.6105	1.6105	0.687505		Rep: Transcriptional corepressor Corl2 - Mus musculus (Mouse), partial (76%) [TC399917]	ACTTGTGTGTGGCCCCTTCCTCTCTGGTACTTTGCCTGCTGTATGAATGAAGATTGTATT
A_73_117686	0.00414993	0.00012201	up	1.60973	1.60973	0.686816		PREDICTED: Bos taurus paralemmin (PALM), mRNA [XM_001253884]	CTTGCTGCCCCCCTCTGCTTTCGATGTGTGATGAGGCCCCATGTTTTTGACTTTCCCAGA
A_73_110937,A_73_P357646|317779	0.00549793	0.000213309	up	1.60877	1.60877	0.685954	GCM1	Bos taurus glial cells missing homolog 1 (Drosophila) (GCM1), transcript variant 1, mRNA [NM_001205290]	GAAGCTGAAACAGAGCCCAGAGATAAAGCCTCTTCCAGGTGAAACACAAAGTTGGGAAAA///ATGAAGAAATGGGGTGCCTGGGTTTGGATCACTGCAACAATGAGATGCTTCTAAACCTCT
A_73_P469738,A_73_P095206|407135	0.00704085	0.000334971	up	1.60814	1.60814	0.685396	HTR2B	Bos taurus 5-hydroxytryptamine receptor 2B (HTR2B), mRNA [NM_001205448]	TCTTTTTTCTACTGCATCCATTCAGCATCTCTGCGCCCTTTCAGTGGATCGTTACATAGC///AGGCTATGTTTCCTCAGGAGTGAATCCTCTGGTCTACACTCTCTTCAACAAGACATTTCG
A_73_P138806,A_73_P041831|100125389	0.0177092	0.00174252	up	1.60747	1.60747	0.684789	MACROD2	Bos taurus MACRO domain containing 2 (MACROD2), mRNA [NM_001105029]	TGGTGAAAGAAATAACATCCGATCAGTTGCTTTTCCATGCATCTCAACAGGCATTTATGG///TTCTGGTCCCTGTCTGCTTTCTCGGTTATTTCACAAAGCTGGTTGGTACAGTGGTTTCTT
A_73_120927	0.0134772	0.00110175	up	1.60454	1.60454	0.682163		GLIS family zinc finger 1 [Source:HGNC Symbol;Acc:HGNC:29525] [ENSBTAT00000023928]	CCTAATGGGGCTTTTGACCACTGCCTGAGTCACATCCCTTCCATCTACACAGACACCTGA
A_73_111699	0.0249708	0.00304626	up	1.60434	1.60434	0.681978		Rep: MGC139608 protein - Bos taurus (Bovine), partial (5%) [TC468420]	AAAGCAAGCCATGTATTTCTACAACCCGTAACTTTGTGCTTTCTGGCCCCTCTCATCAAA
A_73_117564	0.0214963	0.00236878	up	1.60335	1.60335	0.68109		PREDICTED: Bos taurus zinc finger protein 333 (ZNF333), mRNA [XM_001256331]	CTTTATCTGTGTCTCTTCCCATGGAAGGGCCCCTTGCTGATGAACTTCCTGTTTCTACAG
A_73_P039051,A_73_119403|281718	0.0452956	0.00774643	up	1.60272	1.60272	0.680525	CRYAA	Bos taurus crystallin alpha A (CRYAA), mRNA [NM_174289]	CTTTCCAGTTCCTTTTCCTCTTCTTCGAGGGCTTGAGGGTTTGAGAGAGTAGCCGGGAGG///TTCCTTTTCCTCTTCTTCGAGGGCTTGAGGGTTTGAGAGAGTAGCCGGGAGGCCCAGGGC
A_73_115939|281456	0.00570282	0.000229724	up	1.60245	1.60245	0.680283	RHCG	Bos taurus Rh family C glycoprotein (RHCG), mRNA [NM_174172]	TGTAAGCCAGTGTCTTCCATACCCCCTGAATCCCCTAGACCTCTCTGTGCCATGCAGATG
A_73_104011,A_73_P073201|538640	0.0478683	0.00842949	up	1.60213	1.60213	0.679989	ESRP1	Bos taurus epithelial splicing regulatory protein 1 (ESRP1), mRNA [NM_001193002]	GAATACTGTGGCTTCGTATGTATTATTTTATACTGTACTTTTCCCGTTATTGATGCTTCG///TAAGTCTTGGGGGGAAAAATACTCCACTGACATCTGCCATCTCCACCAGGAACTCTTTTA
A_73_P093561,A_73_P038681,A_73_P108469,A_73_103477|282368	0.00091144	5.8333e-06	up	1.60209	1.60209	0.679958	SLC6A9	Bos taurus solute carrier family 6 (neurotransmitter transporter, glycine), member 9 (SLC6A9), transcript variant 2, mRNA [NM_001242342]	TATCATGTGTGTGTCCATCATGTACATTTACGGGCACCAGAACTACTTCCAGGACATCCA///CGCACCACTAGGATTTTAAAGTCCATAGGTTTTAATGAAATTTCTATTCCTGTCTCTGTA///TAACCCTTGGAACACGCCCGACTGCATGAGTGTGCTGGATAACCCCAACATCACCAACGG///TCTGTAGCAATAATGGTGTGCCTCCCACCCCCGACCATCCGCGCACCACTAGGATTTTAA
A_73_P122356	0.0317892	0.00442184	up	1.60096	1.60096	0.67894		706065 MARC 6BOV Bos taurus cDNA 3', mRNA sequence [CB451305]	GTAGCGCAAAAGAATGTTTGTTTTCTCTGTCACGATGATCTGTTCAGACGGGTACTCCCT
A_73_113655|509942	0.026671	0.00337282	up	1.60079	1.60079	0.678781	CHRD	chordin [Source:HGNC Symbol;Acc:HGNC:1949] [ENSBTAT00000045854]	AAGGGTCCCCTTCCACTTCACTCCTGCTGCCCCTGAGCTGAGCAGAGTCATTATTGGAGA
A_73_P513083	0.010554	0.000705615	up	1.59912	1.59912	0.677282		CR850771 Normalized and Subtracted bovine endometrium tissues (bcbp) Bos taurus cDNA clone bcbp0011.n.03 5', mRNA sequence [CR850771]	TGGTATTTTCACTGTTTTTGTTTCTTGTTGGCTGGTGAAGGGATAGGGTGCCCTGGTTCT
A_73_121172	0.0221285	0.00248721	up	1.59879	1.59879	0.676979		Rep: Thaumatin-like protein; 9376-10898 - Arabidopsis thaliana (Mouse-ear cress), partial (5%) [TC413721]	AAGAAGGATCCTTCAGAAGAACTGGTGGTGATTGTTGAAGCTGGGTGGGTGGTTTCTTTT
A_73_P112256	0.00353862	8.83641e-05	up	1.59775	1.59775	0.676045		class II major histocompatibility complex transactivator [Source:HGNC Symbol;Acc:HGNC:7067] [ENSBTAT00000027518]	TGGTTCTTTGGGGACACAGCTTTTCTCTGCCTGTGTCCCGTGGGACGTGGTATTGTGGTG
A_73_P056474|785023	0.0303307	0.00410778	up	1.5973	1.5973	0.67564	PRAME	Bos taurus preferentially expressed antigen in melanoma (PRAME), mRNA [NM_001245953]	TGGTTCAGCTCCAACACCTGTCCCCACTGCGGTGACGAGATCTTCTACGGCATCTGGCCC
A_73_117494	0.0148462	0.0013106	up	1.59663	1.59663	0.675026		Rep: Gp17 - Roseobacter phage SIO1, partial (6%) [TC486877]	AGGACATAGTTCTGAGTTGCTGGATCAAACCTCACCTGATGTCTTTTCTCTGGAACATTT
A_73_106375	0.0083306	0.000455474	up	1.59555	1.59555	0.674055		Rep: PRICKLE1 protein - Bos taurus (Bovine), complete [TC432612]	AGTGTCCTAGTGGTATCTCAGACCTTTAGGAAGGTATTTAATAAATGCTTAATCCCTAAA
A_73_115452|537633	0.00743706	0.000374267	up	1.59522	1.59522	0.673753	NPHS2	Bos taurus NPHS2, podocin (NPHS2), mRNA [NM_001206107]	AGGCATCCCCTTACCAAATCCTTCCAAACCTGTTGAGCCGCTGAATCCTAAAAAGAAAGA
A_73_P376931,A_73_P042016,A_73_119863|527885	0.00254544	4.50813e-05	up	1.59502	1.59502	0.673575	ZDHHC9	Bos taurus zinc finger DHHC-type containing 9 (ZDHHC9), mRNA [NM_001034561]	GGGGGGAGTGTAAACCAGAACTTTTAATCTATTTGAAGGTGATTAAACTGTGTCTAATGC///TTTTACTACCTGTGCCATTCTCAATAAGAACTTACGAGATGCCAATGGCATGGCCCCTCA///GGAAGCTGAGAAGTAGCCTATGTATGGAAGAGACTTTCGTTGTGTTTGATTAGGGCTGTG
A_73_117273|513538	0.000951389	6.45861e-06	up	1.59388	1.59388	0.672543	NPTX1	Bos taurus neuronal pentraxin 1 (NPTX1), mRNA [NM_001192354]	GCTTGTTCGGTGATGATCCGTCGTCTCTTCTTCTCTCCCTTTCCCCCAGGAATGACTCAA
A_73_104173|614335	0.0117357	0.000867072	up	1.59374	1.59374	0.672416	RAB3IL1	Bos taurus RAB3A interacting protein (rabin3)-like 1 (RAB3IL1), mRNA [NM_001046532]	ACCCCCTAGTGGCCATACTTCACCCCATTCCCAGATGGCCTCCCCAACGAAGGCTAGTGG
A_73_P038251,A_73_P262576,A_73_P369076,A_73_102507|282291	0.0133626	0.00108344	up	1.59289	1.59289	0.671649	NFKBIA	Bos taurus NFKB inhibitor alpha (NFKBIA), mRNA [NM_001045868]	GTCTGACGTTATGAGCTTCAGAAAGAAGCTAAAAGAACATGGACTTGTATATTTGTACAA///AGGTGTGTGTTCCCCTCCTGTAAATAGTGTACATAGTGTATTTTGTCAGTAATTATTTTG///ATTGAAGTGTGGGGCTGATGTCAACAGAGTCACCTACCAGGGCTACTCCCCGTACCAGCT///GTGGGGTTAAAAGTCACTACCTGTCAAGGTGTGTGTTCCCCTCCTGTAAATAGTGTACAT
A_73_P071266|521542	0.00216483	3.4138e-05	up	1.59262	1.59262	0.671407	DEPDC5	DEP domain containing 5 [Source:HGNC Symbol;Acc:HGNC:18423] [ENSBTAT00000001707]	TGTGGCTTTTTGTTGGTGCCGGTTTTGGAGGGGCCCTTTGCTCTGCCCAGTTACCTGTAC
A_73_116401,A_73_P096456|540907	0.000558322	1.87599e-06	up	1.59206	1.59206	0.670898	EPHB3	Bos taurus EPH receptor B3 (EPHB3), mRNA [NM_001192796]	CTCTCAGAGCCAGAGGTCGGATGTGTGTGTGTGTGTGTGTGTGAGAGTGTGTGTGTGAGC///ACCAAGGACCGTGCAGGAACTCCGACCAGCCGACTGGACTTTTGGACTTTTGGTTGCTCA
A_73_112690|281904	0.036735	0.00555251	up	1.59009	1.59009	0.669112	LOXL4	Bos taurus lysyl oxidase like 4 (LOXL4), mRNA [NM_174384]	ATCTTCACAGGTCTGACGCTCTCATGCCAATAAAGGTTGCTCACTATGGACTGCTACAAA
A_73_P491013	0.0492509	0.00883093	up	1.59009	1.59009	0.66911			TTGGTGATGGACAGGGAGTTTCCTGATGACAAAAGATGTGAAGCATTTAGCATCCTTTAA
A_73_P063916	0.00286916	5.69669e-05	up	1.58854	1.58854	0.6677		minichromosome maintenance complex component 2 [Source:HGNC Symbol;Acc:HGNC:6944] [ENSBTAT00000019121]	TGTTTGTTTATTCTGCTCTGTCTTCTGGGGACTCATCTTCTAGGGCTGCATTTTCAGCAC
A_73_111660,A_73_P084186|507252	0.032885	0.00468853	up	1.58752	1.58752	0.666775	OLFM2	Bos taurus olfactomedin 2 (OLFM2), mRNA [NM_001205320]	TTTGCGCCCAGCTTTCATTCTGTGCCTCTGTATTTCTATTGGTGCGTTTTCTCTGTATTG///GAGTACACGGACGTGCCCTTCCACAACCAGTATTCCCACATCTCCATGCTGGATTACAAC
A_73_P443476,A_73_P076011|511036	0.0257139	0.00319092	up	1.58692	1.58692	0.66623	ATG16L2	Bos taurus autophagy related 16 like 2 (ATG16L2), mRNA [NM_001192280]	ACACCAAGGCCTATCACCAGCAGCTCTGAGGGTGAAGTGGCAAGAGGAGGTGGAGGGGCT///ATCAATGTCCTTTCCTACTGTAACGACGTGGTGTGTGGGGACCATATCATCATTAGTGGT
A_73_P123951	0.000835316	4.36954e-06	up	1.58643	1.58643	0.665784		000927BEMN026750HT BEMN Bos taurus cDNA, mRNA sequence [DY142616]	ATTTTCTCCTGCTGAGCAGAAGCGTTGTCCCCTGCAAACTACCTCTTTCCACCACGTCTT
A_73_103344,A_73_P185257,A_73_P198972,A_73_P087446|768210	0.00228232	3.64265e-05	up	1.58575	1.58575	0.665163	RELL1	Bos taurus RELT like 1 (RELL1), mRNA [NM_001078098]	TGAGTTGGCTACCACCTTGATGTAAAAATTTGTAAAGGGAATTTTTCACCATTTTGAGTG///ACATTTTAGCAGCAATGGTAGAAGATAACAACGTGTGTGATCCTGAAAGCCCAGTGACGC///GTGCCTTGGGGCACTTCCTTTATTGCAAAAAGAAAACACAGTTCTCATTTATCTCAAAAG///TACAAAAGTGGAACCCAAGTCCAATCAGAAGGAGCGGAGAAGTTTGATGTCAGTTAGTGG
A_73_102285	0.0329462	0.00470732	up	1.58552	1.58552	0.664959		PREDICTED: Bos taurus glycerophosphodiester phosphodiesterase domain-containing protein 4 (LOC786996), mRNA [XM_015466588]	GTACTATGCTCACAAAGTTGAGAGTTCTGCAAGTGGTTGTTGGATTGCCCTTCCTCCTTA
A_73_P122786	0.0436921	0.0073403	up	1.58546	1.58546	0.664905		PREDICTED: Bos taurus ethanolamine kinase 2 (ETNK2), mRNA [XM_612564]	TTTGTAAATGATCATCATTTCCTGCATTAAAATGGTCACGTATGGGCCAACCTGACAGCC
A_73_P154252,A_73_113661|614629	0.0314531	0.00434867	up	1.58531	1.58531	0.664765	BOLA3	UMC-bof_0A02-006-d08 Ovarian Follicle bof Bos taurus cDNA 3', mRNA sequence [CX954338]///Bos taurus bolA family member 3 (BOLA3), mRNA [NM_001035452]	ATATGAATATATATTCCACCCCACTACCTTTCTAAAACACAAACGATGGCATGTCAAACA///TACTGCTAAAACTTCGGATGACTCTTCCTACCACCGTGCTTCCTCAGCATATGACAAAAA
A_73_105433|532275	0.0132668	0.00106681	up	1.58439	1.58439	0.663926	NIPAL4	NIPA like domain containing 4 [Source:HGNC Symbol;Acc:HGNC:28018] [ENSBTAT00000026918]	ATGTCCTGGTGGACAACATGGAACTCTCCAGCACCCCATCACCAGAAGAGAAGCCCAAAG
A_73_P092192,A_73_P037051,A_73_P050506|781011	0.00376301	9.92838e-05	up	1.58437	1.58437	0.663912	CD1A	Bos taurus CD1a molecule (CD1A), mRNA [NM_001075382]///Bos taurus CD1a molecule (CD1A), mRNA [NM_001105456]	TTTTGGCTTTGGAAGCACTGGACACACCATGAATCCCCAAGCTCTATTCTTCCTTTGGAA///AGCTGTTTATTTCCCCTTTCCCTTCTATTTTATAAGCTTCTTGAGAACAAAGTCCATGTC///AAATAATACACAAGCTGCTCAGTGATACCTGCCCACGTTTCCTCTTGGGTCTTCTTGATG
A_73_P057546	0.00463871	0.000154871	up	1.58377	1.58377	0.663367			ATGTACTTCTTCCTCAAGAACCTCTCCTTTGTGGACCTGTGTTACTCATCTGTCATCTAC
A_73_111546,A_73_P349266,A_73_P260276|614380	0.00206213	3.15737e-05	up	1.58266	1.58266	0.662352	SLC22A16	Bos taurus solute carrier family 22 member 16 (SLC22A16), mRNA [NM_001076324]	GTTAGAAAATGTCACAGTGGAGAACTCTGAGGATTCTAGTCTTAATAAATAAACGGGCCA///TGCCTTCCAGAATATCTCTTGTGGTATCCACTACTTGGCTTCTGTGTTCTTGTCAGTGTC///TATCTCTGGAAGTGGCTATCTCGTGGTGGTGTTTGTCTATGTGACAGAATTTGTCGGCAT
A_73_P038106|524530	0.025747	0.003196	up	1.58265	1.58265	0.662347	CCND1	Bos taurus cyclin D1 (CCND1), mRNA [NM_001046273]	GTGTTTTCCTTTGCTCTTTTTCCCTTCCGTCTCTGACTTAAGCAAAAGAAAAAAGTACCC
A_73_P493763	0.0370463	0.0056303	up	1.58264	1.58264	0.662336			GGGCGGGGGCCTGGGGGCGGGGGTCAGGTGGCCCTGGCAGGAGTTCCGGGTGAGGGGTGA
A_73_101644	0.000946305	6.25089e-06	up	1.58238	1.58238	0.662097			TGACCTCCGCTAGTTCCTTCTGGCTTCTGCCCCTTATACCCCGTCCACTCTCAGCAGGAG
A_73_P034201|615414	0.0220547	0.00247604	up	1.58224	1.58224	0.661967	CCND2	Bos taurus cyclin D2 (CCND2), mRNA [NM_001076372]	AATCCGCTCTCTCCTTCTCTCTGGTTGTATTTGGTTCTCTTACATTTTAGGATGAAACTT
A_73_P046836,A_73_P399996|512024	0.00475541	0.000164869	up	1.58178	1.58178	0.661545	CACFD1	Bos taurus calcium channel flower domain containing 1 (CACFD1), mRNA [NM_001080263]	AGGAAGGAAGAGCTGGCTGTGTGTGGAGCAGGGTTGTGGCTCTGGCCTGTGAGGAAGCTG///TTCAACTGCATCACCATCCATCCTCTGAACATCGCGGCCGGCGTGTGGATGGTCATGAAC
A_73_P399776,A_73_P360536,A_73_P069591,A_73_110424,A_73_P102621|281117	0.00606716	0.000255057	up	1.58117	1.58117	0.66099	DLK1	Bos taurus delta like non-canonical Notch ligand 1 (DLK1), mRNA [NM_174037]	GGTGTCCAATCTGCGCTACAACCACATGTTGCGCAAGAAGAAGAACCTGCTGCTGCACTA///CGCCCCCGGGTTCTCAGGAAAGGATTGTCAGGAAATGGATGGGCCCTGCGTGGTGAATGG///GCAACCAACGTAATTGCCAGATGAATCCTCTTTCTCTCTTCTTAATGCATGATATAAAAA///CTCCCCTCTCCTGCCTTTGCGCTGCCGTGTGTGTGCAACCAACGTAATTGCCAGATGAAT///ATCGTGACCAACAGCTGCATCCCCAACCCGTGCGAGAACCAGGGCATCTGCACCGACATC
A_73_115650	0.0141704	0.00120981	up	1.58082	1.58082	0.660672			CGTGTCTTAGTATCTGTAAGCCTCATCCTTGCCCTTTCTCCTGATAAGATCCACGTTTCT
A_73_104588,A_73_P106456|100297981	0.0039253	0.000108362	up	1.58081	1.58081	0.660666	EGR2	early growth response 2 [Source:HGNC Symbol;Acc:HGNC:3239] [ENSBTAT00000064240]	ACCCTATGCAGCAGCAACAGCAGCACTATTGGTGGGGGGTCCCTCGGCCCTTGTTCGTCT///ATCAACATTGACATGACTGGAGAGAAGAGGTCCTTGGATCTTCCATATCCCAGCAGCTTT
A_73_109793|505170	0.00425387	0.000130588	up	1.5807	1.5807	0.660567	CYTL1	cytokine like 1 [Source:HGNC Symbol;Acc:HGNC:24435] [ENSBTAT00000014829]	GCCGTGGCCCCCATAGCTCTCCTTGAAACTGTCACGAGTTTGTCTTCACCTTCTGAAACC
A_73_P490358	0.040654	0.00650518	up	1.58022	1.58022	0.660123			AATGGAGGAAGATTTTATCAGTCTAGAGGATAAGATGACCTGCTCTGTGGCTCCCAGTCA
A_73_P117376	0.00608909	0.000257	up	1.57888	1.57888	0.658905		fbn-l079 Cattle pUC18 Library Bos taurus cDNA, mRNA sequence [BE217533]	CTGCTCTTCTCCTTAATAGGGTCTGTGTTTTCCATCTATTAAATGGTTCCACTTCCCAGG
A_73_107556,A_73_P134301|510745	0.00564905	0.000224592	up	1.57867	1.57867	0.658712	ABCG1	Bos taurus ATP-binding cassette, sub-family G (WHITE), member 1 (ABCG1), mRNA [NM_001205528]///PREDICTED: Bos taurus ATP binding cassette subfamily G member 1 (ABCG1), transcript variant X2, mRNA [XM_015473650]	TGTGCTCCTCTTCTCAGGGTTCTTCGTCAGCTTTGACACGATCCCCACCTACTTGCAGGG///TAACCTGGAATCAGGGTCTCCGAGTGAATCTGCTTTTTTGTTGTATGGAAGTTTGATAAA
A_73_115436,A_73_P043841,A_73_P415786|282087	0.00844402	0.000468092	up	1.57695	1.57695	0.657138	SYNJ1	Bos taurus synaptojanin 1 (SYNJ1), mRNA [NM_174468]	GGAGTCTCCGCCGTCAGACTGGACTGCCCATTAAAGAGTGACCCATTTGAAGACTTGTCA///TGGAAGAAGAAATGAGCTTAGAGAAAATCAACGTCCCCTTGCCATCATCAACCAGCTCCA///TGAATGGTGATTCAATCAGTAAGATTTATGCAGGAACTGGAGCCCTTGAAGGAAAGGCTA
A_73_P206447	0.000942424	6.18927e-06	up	1.5764	1.5764	0.656633		Hw_liver_56_050812_E04 Bos taurus CF-24-HW liver cDNA library Bos taurus cDNA, mRNA sequence [DV786012]	TCGGTATAGCCTCCCCTCGTATAAAATCTGTCATACTTCACGCCATGTCTACTATGATGA
A_73_P153126	0.0235977	0.00278097	up	1.5762	1.5762	0.656446		596323 MARC 6BOV Bos taurus cDNA 5', mRNA sequence [CB423132]	TACTGTTTTTATTTTGTGGGTGCAGATGGAGATTATATCCCCCTGCCAGTCAAGTACAAA
A_73_115331|506075	0.00454708	0.000147307	up	1.57595	1.57595	0.656218	ARHGEF25	Bos taurus Rho guanine nucleotide exchange factor 25 (ARHGEF25), mRNA [NM_001024481]	AGGTTCCTTCAGCTCCCACCCCTATGCATGCATCACAGGTCCCCCCAAAAGGAGGATATG
A_73_P235457,A_73_108310|541217	0.00545017	0.00021039	up	1.57563	1.57563	0.655925	SYNDIG1	Bos taurus synapse differentiation inducing 1 (SYNDIG1), mRNA [NM_001076263]	CGGCAAGTTCATTGACCTCTCGCCCGAAGACATCAAGATCCACACGCTATCCTACGACGT///TTGTCATTTTTTAAGTGCAACTATTGCTTCCTGCTGCTTCAGTTATCAGATGAATGCTGA
A_73_P084787,A_73_103648|509071	0.00943004	0.000566767	up	1.57551	1.57551	0.655817	OR2V2	GB	AGAATGTGATATTTGCTTGCTGTGTCTTCATGCTGTTTCTTCCTTTCTCCATCATTGTGG///TCTATCTTCTACACAGTCCTTACTCCTATGCTGAACCCCCTCATTTATAGCTTAAGAAAT
A_73_118281|512876	0.00330795	7.72992e-05	up	1.57527	1.57527	0.6556	GPR4	Bos taurus G protein-coupled receptor 4 (GPR4), mRNA [NM_001075583]	ATGAACCTCTACCGAGTCTTCGTGGGTTTCCTCTTCCCCTGGGCGCTCATGCTGCTATCA
A_73_P063831	0.0259775	0.00324049	up	1.57493	1.57493	0.655291		Rep: Glutamate receptor-interacting protein 2 (GRIP2 protein). - Bos Taurus, partial (7%) [TC406167]	TCTGGGCCTGTTCCAGTGACATCGAGGTCTTTCTCCAACTGGACCTCTGAGATGTGCCAG
A_73_P032681|540305	0.00116298	1.03975e-05	up	1.5744	1.5744	0.6548	S1PR2	Bos taurus sphingosine-1-phosphate receptor 2 (S1PR2), mRNA [NM_001081541]	ATTTATGTGCGTCTGTCAGTGTCTGTGTGTGTGTGTGTGTGTGTGTGTGTAATATCTGTG
A_73_102819	0.00625122	0.00027072	up	1.57422	1.57422	0.65464			CTGTATATAGTGTGACAAAATGATTTTTCTTTCTTTCTTTTGGATGTATTAATAAATCTT
A_73_P057386	0.0451034	0.0077015	up	1.57406	1.57406	0.654493		Rep: olfactory receptor Olr1353 - Rattus norvegicus, partial (89%) [TC398607]	ATCTGTGGCTCCCACATGACAGCCATGTCCCTCTTTTATAGGACTGTCTTTGTCATGTAT
A_73_P046666,A_73_P343241|768230	0.0142558	0.00122146	up	1.57306	1.57306	0.653571	CYYR1	Bos taurus cysteine and tyrosine rich 1 (CYYR1), mRNA [NM_001078105]	GTTGCCTTTTGCCAAAACCCACATTTTATAAAGTGCCTACCTTTAGGTGTAAAAGTTTTT///CCAATCAGCAATCTTGCCTAGAATAAAATGCCTCTACTCAGAAACAGACAAGAAAGGATT
A_73_118846	0.0189286	0.00192683	up	1.57112	1.57112	0.651792		Rep: Keratin associated protein - Bos taurus (Bovine), partial (8%) [TC418634]	TAGCCACCAGCTACAGCCTGTAAAAAATCAGCTGTTTGAGAGCCTTGTGAGTTGTCTGTT
A_73_P132991	0.0151417	0.00135576	up	1.56973	1.56973	0.650518			TATCTAAACGAGTCCTTCTGTACATGTATTTAACTGTGGGGTCACGTGCGTGTGTCTGTG
A_73_P411581,A_73_P063031|506141	0.00488812	0.000177001	up	1.56954	1.56954	0.650338	IRF4	Bos taurus interferon regulatory factor 4 (IRF4), mRNA [NM_001206162]	TGAAAATGGTTGCCAGGTCACAGGAACCTTTTATGCTTGTGCCCCGCCTGAGTCCCAGGC///TATTTTGCTCAGCAAAACAGCGGACACTTCCTCAGGGGCTATGACCTGCCCGAGCACGTC
A_73_P105161|100141141	0.00128219	1.35612e-05	up	1.56847	1.56847	0.649355	ZNF132	Rep: Zinc finger protein 132 - Homo sapiens (Human), partial (57%) [TC450462]	GTGTGTGTGTCCATGTATACTGGTGAAATATTAATAAGCCTTATGGATTGTAGAAGAATC
A_73_111993|319086	0.0328679	0.00467971	up	1.56817	1.56817	0.649079	OSM	Bos taurus oncostatin M (OSM), mRNA [NM_175713]	TTCCAGCGCAAGCTCAGGAACTGTGGGTTCCTGCGAGGCTACCACCGCTTCATGCGCACA
A_73_P256766,A_73_P031981,A_73_P294986|767827	0.00315543	6.86224e-05	up	1.56811	1.56811	0.649029	C1S	Bos taurus complement C1s (C1S), mRNA [NM_001076550]	ACCTCACAATTGTCAAATGCTCAGATGCTCACTGCAGAGAGAGTGTTTATCCATCAAGGA///TGTTTGAAGTTGACCACATCGTTTCTGCTATCTACTTGTAATAAAGCATGTTTATAACCC///AGGTAGGGTTCTGCTCCTGTGGCTGTGTTGGTCTTTCAGTATAATTGGACTAACTACATG
A_73_102792	0.00947871	0.000574024	up	1.56736	1.56736	0.648341		GB	AGCAGTCCCCAGGTGGGTTTTTTCTTTGTCCTGTGTGCCCAGATGCCTGGGGCAGGAAAA
A_73_113802|521383	0.0107839	0.000736295	up	1.56733	1.56733	0.648307	PLA2G2A	Bos taurus phospholipase A2, group IIA (platelets, synovial fluid) (PLA2G2A), mRNA [NM_001075820]	AAAGAGAAGCACAGATCTGGGCATGTATGCCAAGCTCCTTGCCCCCGCTTCCTTGGACAG
A_73_101066,A_73_P376651|510813	0.0229493	0.00264018	up	1.5668	1.5668	0.647825	LGALS9	Bos taurus galectin 9 (LGALS9), transcript variant 2, mRNA [NM_001015570]	GAAGCCTGCCACGAGGGATGCCCTTCTTCCGAGGCCAGAGCTTCTCGGTGTGGATCATGT///AACCTTCAAACCGGCTATAACGACAGTGACATTGCCTTCCACTTCAATCCTCGGTTTGAA
A_73_P149511	0.0164096	0.00154949	up	1.5647	1.5647	0.645888		Rep: PREDICTED: zinc finger protein 629 - Pan troglodytes, complete [TC401006]	AACTGATCTGAGCTTAGGGTGAAACTTGAAACTGCTATGGATATGGAGGTCAGAAGGGAG
A_73_P095441,A_73_P445586|615012	0.02849	0.00373775	up	1.56463	1.56463	0.645821	MAN1C1	mannosidase alpha class 1C member 1 [Source:HGNC Symbol;Acc:HGNC:19080] [ENSBTAT00000061594]	ATCTCTATCTTCTGTTCTCTGAAGATGACATGCTCTCCCTGGAAGACTGGGTGTTCAACA///CCTGGGTCGAAGAGAGCTTCCACCTGAACGTGAGTGGAGAAGCATCCTTGTTTGAAGTGA
A_73_P128361	0.0328679	0.00468053	up	1.56372	1.56372	0.644981		fibrosin like 1 [Source:HGNC Symbol;Acc:HGNC:29308] [ENSBTAT00000056742]	AAGGCATCTGTGGGCTCCGAGAAGCTCTTTGCCCCAGCAGCCGATAAAGGCCACACGCTG
A_73_P040406|782719	0.0205781	0.00220474	up	1.56364	1.56364	0.644906	CXCR2	Bos taurus C-X-C motif chemokine receptor 2 (CXCR2), mRNA [NM_001101285]	TCTGGATATCAATAAGCATGCTGTAGTCGTCATCTATGCCCTGGTCTTCTTGCTAAGCCT
A_73_114464,A_73_P080156,A_73_P357816|523131	0.0245932	0.00297578	up	1.5636	1.5636	0.644869	TNFAIP8L3	PREDICTED: Bos taurus tumor necrosis factor, alpha-induced protein 8-like 3 (TNFAIP8L3), mRNA [XM_601426]///TNF alpha induced protein 8 like 3 [Source:HGNC Symbol;Acc:HGNC:20620] [ENSBTAT00000056282]	ACAGGAGAGTTGGCCTGAATGAACCCCTGTCTGTCTTTCTTGGTCTTTCACAGTCATTTT///AGGCCCAACCTCAAGAAGATCTGTGAGGGAATCAATAAACTGATAGATGAAAAAGTCCTC///TAAAATCTCCTTTGTTTGCAAGCCCAAAGGACGTCTTATCTCTCCTGAGCAGAAAAGCCA
A_73_P084006	0.0109239	0.000764224	up	1.56317	1.56317	0.644477		LB02743.CR.1_F08 GC_BGC-27 Bos taurus cDNA clone IMAGE:8625994 5', mRNA sequence [EW684810]	CCGGGCACATCCTGTACTCCCTGACAAAGGAGTATGGGGTGGAACAGGGCTTATTCCTTT
A_73_P134291	0.00487514	0.000176093	up	1.56305	1.56305	0.644364		4082155 BARC 9BOV Bos taurus cDNA clone 9BOV20_H20 3', mRNA sequence [CK966911]	GAACATTAATTCTGGAATCCCGCCTCTTTGTCTCGAGCCCTTGTGCTATTTGTCTGTTAC
A_73_P118596	0.0424535	0.00697411	up	1.56302	1.56302	0.644334		Rep: Transcription factor 21 - Bos taurus (Bovine), partial (84%) [TC417181]	CATGATCCTCGGTCTCTGCCTTCCAAGTTGCGGAACGCGGTGATTTATGCGAGTGTTTGA
A_73_111667,A_73_P058786|618005	0.0026341	4.81066e-05	up	1.56274	1.56274	0.644074	GPC2	Bos taurus glypican 2 (GPC2), mRNA [NM_001193180]	ACAACCCCTCCTCATTCTCTTCCTCTTAGCCCTAGCCCTGCTTGGACCTCGATAACAGGG///GAGGGACGTCTGTTGGTTTTCACACACAACCCCTCCTCATTCTCTTCCTCTTAGCCCTAG
A_73_P131236	0.00407869	0.000117268	up	1.56255	1.56255	0.643903		963788 MARC 2BOV Bos taurus cDNA 3', mRNA sequence [CK774980]	GCAAGTGATACATTTCTCCTCCCTTTGGACTTTAGAATCTGCCTCCTGTAATTTGTCTGC
A_73_111039|523101	0.0042235	0.000128043	up	1.56186	1.56186	0.643269	SOWAHD	sosondowah ankyrin repeat domain family member D [Source:HGNC Symbol;Acc:HGNC:32960] [ENSBTAT00000065997]	GCAACCGGGTGGCGCAAATTCAAGGCCTCCTCCGCCATATGTTCCCCTTCTTCCAGGACC
A_73_P490568	0.00754805	0.000387911	up	1.56169	1.56169	0.643106		Rep: Os03g0189900 protein - Oryza sativa subsp. japonica (Rice), partial (6%) [TC450373]	CCCACCTCCTCCATTAAGTCTTCCCTGATCATTTTTGCCTTCAATAATACATTAAAATAA
A_73_100881|512445	0.0206669	0.00221945	up	1.56147	1.56147	0.64291	ZSCAN26	Bos taurus zinc finger and SCAN domain containing 26 (ZSCAN26), mRNA [NM_001101957]	GTATAAATTTATAGGTTTAAGCAGAAGAAGAGAGGGTTGATATTTTTGCACATGCTGCAG
A_73_P083636,A_73_P267731|618753	0.00752027	0.000383044	up	1.56131	1.56131	0.642754	RNF187	Bos taurus ring finger protein 187 (RNF187), mRNA [NM_001164265]	GTATTGGGGGTAAGTTAACCCAAGTGTATCCTGACTCCATAAAGTTCTTTTTGTTGCCCC///TTCTTTGCCGAGGAGGAGGGGCGATTTCTACAGGAAGCGGAGAAAGAAGAAGGGTCCCTG
A_73_P259301,A_73_112799|528453	0.00110391	9.30296e-06	up	1.56023	1.56023	0.641759	SFN	Bos taurus stratifin (SFN), mRNA [NM_001075912]	TCCTACAAAGACAGCACCCTCATCATGCAGCTGTTGCGAGACAACCTGACGCTGTGGACG///ATGAAAGTGTGTGTGTGTGTGTGTGCCTGTGCGTGTGTGTGTGTGTGTGTGCAGCAACCA
A_73_P434981,A_73_P106876,A_73_P041431|514735	0.0270054	0.00342829	up	1.56023	1.56023	0.641758	LAT	Bos taurus linker for activation of T-cells (LAT), mRNA [NM_001104978]	GAGTTGACTCACTGACCTCAGAGGACCTTCTTAATTCTTAATTTTTGTGGTTCTTAATAA///TCTACGTGCTGGGGCCCCTGCTGCTGCCTCTCTTGGCTGTGTTGCTGATGGCTATGTGTG///ACAAAAGCCTGAGAATTTTTCCCCTAACTTATTGTCACTTTGGGGTCCAGTCTCTGTGGG
A_73_P168792	0.00211486	3.29069e-05	up	1.56018	1.56018	0.641715			GTCCAGGGTCCATTTGAAGTAAGTTGCACTTTTTAATGTTGTGGTGTTGATTAATTTGTT
A_73_P075841|524658	0.00865952	0.000487036	up	1.56005	1.56005	0.641591	LOC524658	GB	TCTATGTGGTCGTTCCACCTGCCCTCAATCCTATTATCTATGGTGTGAAGACAAAGCAGA
A_73_P355841,A_73_105037|282351	0.00835814	0.000459235	up	1.55984	1.55984	0.641398	ST3GAL1	Bos taurus ST3 beta-galactoside alpha-2,3-sialyltransferase 1 (ST3GAL1), mRNA [NM_001097983]	TCTGCCCAAAGATCATTAAACTGTGGCCATGAGGGGTCCCCGCCCTGAAGGTCTTCAGGA///GGTACACGATGGGGACTTCGAGTCCAACGTGACGGCCACCTTGGCGTCCATCAACAAAAT
A_73_P100481,A_73_118948|281343	0.00454708	0.000147576	up	1.55983	1.55983	0.641392	MYOG	Bos taurus myogenin (MYOG), mRNA [NM_001111325]	ACTCAAGAAGGTGAATGAAGGCTTCCAGGCCCTCAAGAGGAGCACCCTGCTCAACCCCAA///GGCAGGGGCTCCTGGGGTGATTAATTTTGTTAACTAAGCATTGTGTGGTTTTGCCATTGT
A_73_104674,A_73_P136501|509761	0.0201861	0.002138	up	1.55982	1.55982	0.64138	LOC509761	PREDICTED: Bos taurus sperm adhesion molecule 1 (PH-20 hyaluronidase, zona pellucida binding)-like (LOC509761), mRNA [XM_586790]	ACTGCCCTTTACCCCTCTGTTTATTTGAATACCAAGCTAAAATCTTCTCCACAAGCTAGA///AAAGGGGCCATAAGAGTGTTGACTGGAAAAATATATTCCGTCAGTTATACTTTCAAAACA
A_73_107391|517887	0.0376649	0.00577557	up	1.55862	1.55862	0.640273	CYTH4	cytohesin-4 [Source:RefSeq peptide;Acc:NP_001243598] [ENSBTAT00000030432]	AGCTTCCTTCCCTGTCACTGAGAGGGTGGAATGGGGGATTTCTGGGCATGAGTGGCTGTT
A_73_121155|505158	0.0132266	0.00106153	up	1.55851	1.55851	0.640168	ICAM5	Bos taurus intercellular adhesion molecule 5 (ICAM5), mRNA [NM_001113762]	TCTATTTATTTATGTATTCAATTCTAGGGGCGTCACCCCGCATTTTCTACCCCCTCCCCC
A_73_P205997	0.0250115	0.0030553	up	1.55817	1.55817	0.639848		LB00466.CR_H14 GC_BGC-04 Bos taurus cDNA clone IMAGE:8052640, mRNA sequence [DT842913]	TTTGGTTTAAGAATAGAAGAGCCAAGAGTCGGAGAAATGAGAGAGCAGCCGTGGTTCAAG
A_73_P054871	0.0362623	0.00544451	up	1.55794	1.55794	0.639642		GB	TATTTCATGGCACACTCCTGTTCATGTATTTCAGACCCAGCTCCAGTTACTCCATGGACA
A_73_P265006,A_73_P048671|617218	0.0026341	4.81762e-05	up	1.55787	1.55787	0.639575	LOC617218	Bos taurus keratin associated protein LOC617218 (LOC617218), mRNA [NM_001079791]	TGCTGTGAGGCCTCCCTCTGTTCTACCTCCTCATGTTGCCAGCAGTCTAGCTGCCAGCCC///TATGTACTTTCCTCCCACAAGGGTCTTGAGCTGAGTGAATAAACTCACCATCCTTGCCTT
A_73_P091581,A_73_108219|282348	0.0179224	0.00177192	up	1.55758	1.55758	0.639302	SCNN1A	Bos taurus sodium channel epithelial 1 alpha subunit (SCNN1A), mRNA [NM_174598]	TTCTTCAAGGAGCTGAACTACAAATCTAATTCTGAGTCTCCCTCAGTCACGATGGTCACG///TCCATGGGAGTGCTGACGCTGCATTTAATTTTCTGTTCATTTGTGTCTGTGTTCCCAGCA
A_73_118546	0.00754805	0.000388042	up	1.55725	1.55725	0.639005		Rep: Flagelliform silk protein - Argiope trifasciata (Banded garden spider), partial (5%) [TC485701]	TTTTTTGGGGCTTTATTTTCGTTTGGCCGGGGGTTTTTGGTTTTCCCCTCCACCCTGGGC
A_73_P257961,A_73_121203|533044	0.0380696	0.00587107	up	1.55692	1.55692	0.638692	PSAT1	Bos taurus phosphoserine aminotransferase 1 (PSAT1), mRNA [NM_001102150]	GCAGCAGCCATGGAGAAGCTTAGCTCCATCAAATCGCAAATGATTTATGATATTATTGAT///ATGCTGTGAGTTTGGGAAGATCTTTGCTGAAGACTCTTTTCCCCTGTTATTCACCCATTG
A_73_P147826	0.0224363	0.00255374	up	1.55658	1.55658	0.638378		Rep: Nuclear factor 1 X-type (Nuclear factor 1/X) (NF1-X) (NFI-X) (NF-I/X) (CCAAT-box-binding transcription factor) (CTF) (TGGCA-binding protein). - Homo sapiens, partial (87%) [TC439564]	CAACTTTCTGAACATCCCACAGCAGTCTCAGTCCTGGTTCCTCTGATAAGATCGACAAAA
A_73_103072	0.0343607	0.00501963	up	1.55636	1.55636	0.638174			TTCTTCTGGAAGCACTGCGCTGATTTCATTTTGGGTGAACACTCCCTCCTCTCTTCAATT
A_73_P072666|100848249	0.015459	0.0014001	up	1.5559	1.5559	0.637752	LY6K	lymphocyte antigen 6 family member K [Source:HGNC Symbol;Acc:HGNC:24225] [ENSBTAT00000048878]	CGAGGTCAACTGGCTGCAGGTGGTTGGGACTTGCTGTATTAAATTTGTTTTCCATCGATT
A_73_P136271	0.0465132	0.00807011	up	1.55586	1.55586	0.637715		1265957 MARC 7BOV Bos taurus cDNA 3', mRNA sequence [DN522570]	TATACAATACTTTACAAAATGCCCCCGTGATATATTATTGGCTTTTTTCCACTCTTTCGC
A_73_P088646|615312	0.0258593	0.00321536	up	1.5558	1.5558	0.637659	RP9	retinitis pigmentosa 9 (autosomal dominant) [Source:HGNC Symbol;Acc:HGNC:10288] [ENSBTAT00000046264]	CATGAAGATCCCATGTATGACATCATTCGTGAGAATAAAAGACATGAAAAGGATATAAGG
A_73_P206042	0.0372694	0.00568504	up	1.55491	1.55491	0.636828		PREDICTED: Bos taurus SRY-box 11-like (SOX11), mRNA [XM_001250191]	TTTGGATTCGTTCAGCGAGGGCAGCCTGGGCTCCCACTTCGAGTTCCCCGACTACTGCAC
A_73_108215,A_73_P388626,A_73_P396146|510932	0.000864163	5.07726e-06	up	1.5541	1.5541	0.63608	SLC29A1	Bos taurus solute carrier family 29 member 1 (Augustine blood group) (SLC29A1), mRNA [NM_001034398]	CGTGTTCCTACCCATCATGAACCCTGTACATTTGCCATTTTACTGCCTTTTTTATACTCA///TTTCAATGTCTTTGACTGGCTGGGCCGGAGCCTCACAGCCATCACTATGTGGCCTGGGAA///TTCATGACAGCCACTAAGTATTTCACAAACCGCCTGGACATGTCCCAGAATATGTCCTTG
A_73_100077	0.0231898	0.00268845	up	1.55398	1.55398	0.635968		BovGen_08318 normal cattle brain Bos taurus cDNA clone RZPDp1056D209Q 5', mRNA sequence [CO879993]	GCTTACTGGTGGGGGGATGCCAGGGGAGGGGCCGCATGGCTCTCTGGGTTTCATGAATAA
A_73_P488818	0.000978849	6.89396e-06	up	1.55383	1.55383	0.635829		Rep: MGC139945 protein - Bos taurus (Bovine), partial (91%) [TC425242]	GTGCTATCAAGCCTCCCCCTGTTCTACCTCCTCATGTTGCCAGCAGTCCAGCTGCCAGTC
A_73_115803|526409	0.0468735	0.00816998	up	1.55308	1.55308	0.635137	TNR	Bos taurus tenascin R (TNR), mRNA [NM_001205928]	TCAGGGGATCAACTGGTACCACTGGAAAGGCCACGAGTTCTCCATCCCCTTCGTGGAGAT
A_73_P398571,A_73_P251246,A_73_102014|338048	0.0388425	0.00608518	up	1.55242	1.55242	0.634517	CYP11A1	Bos taurus cytochrome P450, family 11, subfamily A, polypeptide 1 (CYP11A1), mRNA [NM_176644]	TTCAGAACCAAGACTTGGAGGGACCATGTAGCCGCATGGGACACAATTTTCAATAAAGGT///TACCCTGAAAGTGACTTGGTTCTTCAAGATTACCTGATTCCTGCCAAGACACTGGTGCAA///TCTTGCACCTTTCTGGCTAGGTCTGACCAGATGAAGCTGGCACTCAGGGGTCAGCTGCTT
A_73_121027,A_73_P361841|510586	0.024685	0.00299071	up	1.55239	1.55239	0.634495	PEA15	Bos taurus phosphoprotein enriched in astrocytes 15 (PEA15), mRNA [NM_001075456]	GCGGAGTGTAGTAAATTTCTCTGTAAGGCAAAATAATCTAAAAAGACTAACCTGCCCTCC///GTGTGTACATATATATTCTACATATATGTATATTAAACCCGCACTGCCATGTGTACCCTT
A_73_110027|540701	0.0040549	0.00011581	up	1.55232	1.55232	0.634431	MEP1B	Bos taurus meprin A subunit beta (MEP1B), mRNA [NM_001144098]	ACCCACAATATATTACAACCACTTCCTCCTTCTGTAAATGGATCTTCTCTGTAAATAGCT
A_73_106403	0.0295469	0.00394297	up	1.55217	1.55217	0.634286			TTAATCCTCACTGCCATTTTGTCTATGGGCTGATGTTTTAATATTGGAGTCATAATACAG
A_73_P059451,A_73_P211152,A_73_P030021|768051	0.0428691	0.00707793	up	1.55206	1.55206	0.634187	ZNF22	Bos taurus zinc finger protein 22 (ZNF22), mRNA [NM_001077108]	GGCTGGGCTCCGCTGAGGAAAGGGCAAAACATAAAAAGTGTTTCTTTTAGAACTGGAGAT///CTATAGATGTGATGAGTGTGGAGAGAGGTTTAAACAGAGCTCGAACCTCATTCAGCACCA///GTGCCAAGTATCAAACATTTTGATCAGCCTTCAGCTCAGGTTTTAATTTCTATTAAATGC
A_73_119572,A_73_P103466|537960	0.0376155	0.00576082	up	1.55158	1.55158	0.63374	ATP1A4	Bos taurus ATPase Na+/K+ transporting subunit alpha 4 (ATP1A4), mRNA [NM_001144103]	GCCTCCTCATCTTTGTGTATGATGAAATAAGAAGACTCATCATTCGTCGTTATCCCGGTG///ACACCTCATGAGCGGAATCCAAACCCAGGACCTACAAACAGTCCTAAGATGAGTAAAAAA
A_73_108051|539075	0.00852107	0.000474369	up	1.55114	1.55114	0.63333	NKX2-8	Bos taurus NK2 homeobox 8 (NKX2-8), mRNA [NM_001192163]	TTCGGGCCTGGCTCGGCTTTCGGCCTCTTCCCCGCCTACCAGCACTTAGCGCCCCCCGCC
A_73_115858|280873	0.0379701	0.00584557	up	1.55064	1.55064	0.632868	MX2	Bos taurus MX dynamin like GTPase 2 (MX2), mRNA [NM_173941]	CTTGGCTGGTCCTTTTCTTATAAATTCAGTCGTACCACCTGCTTCCCATCATTTGCTGTG
A_73_P363401,A_73_P351126,A_73_117446,A_73_P411001|532640	0.00413955	0.000121073	up	1.55024	1.55024	0.632494	NRAP	Bos taurus nebulin related anchoring protein (NRAP), mRNA [NM_001098072]	TTCAAAGTGATGTGAGATACACAGAGGCCTATGAACAGCAGAGAGGGAAAGGCAGTTTTC///AGTGAGACCAAATACCGTGAAAAACCAGACACCATCAAGTTTACCACAGTGGTTGACTCC///CTTCAGTCGGAGCCAGCTGTGAAAACGGCGCCCCTGCCCTAGCCCTCCCTTATTAAAATA///CTGACTATGAGAAAAACAAGTTGAATTATACGTTGCCCAAGGATGGCCCTCAGCTGGTGA
A_73_P031476,A_73_P299221,A_73_113459|504401	0.0153951	0.00139315	up	1.55019	1.55019	0.63245	FMO2	Bos taurus flavin containing monooxygenase 2 (FMO2), transcript variant 2, mRNA [NM_001075162]///Bos taurus flavin containing monooxygenase 2 (FMO2), transcript variant 1, mRNA [NM_001163274]	TTATGTACCTTGCCCTCAGAGAGAACTATGATGGAAGACATTATCAAGAGGAATAAAAAA///AAATGATGATCTTCCAAGTCGTATACTCTATGGAGCCATCAAGGTGAAATCAAGAGTGAA///TGAAAATCCTGGGGCTTCTTGCTGTTGTGGTGGCCTTTTTCTCCCAACTTCAGTGATTTT
A_73_100123|505012	0.0226757	0.00258879	up	1.55011	1.55011	0.632371	G6PC2	Bos taurus glucose-6-phosphatase catalytic subunit 2 (G6PC2), mRNA [NM_001192046]	TAAAAGTGCGTCCATCCCACTGACTGTGGTTGCCCTGATTCCCTACTGTATTCATATGTT
A_73_115469|539210	0.00470228	0.000158718	up	1.54925	1.54925	0.631569	PLAG1	PLAG1 zinc finger [Source:HGNC Symbol;Acc:HGNC:9045] [ENSBTAT00000005251]	TCTCAGCTGTTCAATTTCATACCATTAAACGGCCCTCCCTATAACCCGATCTCGGTGGGG
A_73_P092135|509633	0.0155054	0.0014126	up	1.54891	1.54891	0.631252	LOC509633	GB	TGGTCTCTGCTTGGGCTGCTGGCTTCTTTATTTCTGTGACAGAGATTGCGTTGATATTCA
A_73_101404	0.0010361	7.98525e-06	up	1.54817	1.54817	0.630564		Rep: MPN domain-containing protein (EC 3.4.-.-). - Bos Taurus, complete [TC403115]	GGGGCTCAGATTATATAATAAAGGAGAAACGGGCCAGGTGTCTCTCAGGTGCTGTGACTG
A_73_104407	0.00284668	5.57926e-05	up	1.54806	1.54806	0.630462		Rep: Chromobox-like protein 6 - Bos Taurus, partial (7%) [TC410743]	CATGGTTTTTGTTACTTTTTGTTTTTGTAAATTTGAATGTCCAAAATAAACGTGATGTTT
A_73_P225187	0.0042235	0.000127897	up	1.54786	1.54786	0.630277			TATTAAGGTACAGGCCCAGCTCCTTTTCCTTCTTGCTGCCCATGTCATATGGATATTGGA
A_73_110400|538745	0.0199699	0.00209154	up	1.54729	1.54729	0.629744	GJC2	Bos taurus gap junction protein gamma 2 (GJC2), mRNA [NM_001046440]	CTGGGTGTTGAGGGGTTTTGTGCTTATCCCCACTCCTTTCCTAGCACCCGCACTCTTCTA
A_73_P033956,A_73_115978|281350	0.00195968	2.87422e-05	up	1.54677	1.54677	0.629256	NGF	Bos taurus nerve growth factor (NGF), mRNA [NM_001099362]	CGCCCCTCCCTACCTCAACCTGTAAATTATTTTAAATTATAAGGACTGCATGATAATTTA///ACAGCGGGTGCCGAGGCATCGACGCGAAGCACTGGAATTCGTATTGCACCACGACCCACA
A_73_P057871|101902553	0.0464851	0.00806345	up	1.54655	1.54655	0.62905	PRR35	proline rich 35 [Source:HGNC Symbol;Acc:HGNC:14139] [ENSBTAT00000056123]	CGGGCTGCGCGGCCACCCGACGCACCCCTTGACCTCTCTGTGAAGCGGGCTCCCGCCAAG
A_73_108323	0.0102011	0.000656686	up	1.54653	1.54653	0.629035		BovGen_21415 normal cattle brain Bos taurus cDNA clone RZPDp1056G1843Q 5', mRNA sequence [CO893090]	GAGGGGTCTTCACTTTTGTCTCCTTTGTCCTATTGATCTGACAGAGTTGTACCTACAGCA
A_73_P092236,A_73_P101331|353111	0.000603973	2.2858e-06	up	1.54585	1.54585	0.628399	NTRK1	neurotrophic receptor tyrosine kinase 1 [Source:HGNC Symbol;Acc:HGNC:8031] [ENSBTAT00000003980]	ATTGAGAACCCACAGTACTTCAGTGATGCCTGTGTTCATCACATCAAACGCCGAGATATC///TCTCAATGGCTGTGGGCCTGGCCGTTTTTGCCTGCCTCTTCCTTTCTACAACATTTCTTG
A_73_116580	0.00278402	5.34027e-05	up	1.5458	1.5458	0.628351		Rep: Reverse transcriptase-like - Bos taurus (Bovine), partial (6%) [TC444382]	GTCTCTCTCTTTTTTCCCTCCCTGGGGTGGCCATAGCAGTTAGCACAAACTGAGTGGCCT
A_73_101360	0.0488813	0.00872174	up	1.54579	1.54579	0.628346		BovGen_17309 normal cattle brain Bos taurus cDNA clone RZPDp1056N2440Q 5', mRNA sequence [CO888984]	TCGCCACACACAGGTGCGTCCCCAAGCTGGGGCCGTGGTGGTCTTGTGACGCATTTCAAA
A_73_P492118	0.047035	0.00821811	up	1.54522	1.54522	0.627811			CCTGGCTTCTGGGCCAAAACTGTATCCTTTCCGCTGCTCCTTTGGGTCCACTGCTCATGA
A_73_P287371,A_73_P052021|509585	0.0445732	0.00757	up	1.54462	1.54462	0.627252	ACKR3	Bos taurus atypical chemokine receptor 3 (ACKR3), mRNA [NM_001098381]	GACTTTTCTGTGCTGCCTAAAGGTTTCATAATGGGGATTTGTATTTAAATCTTAAGACTC///CTTCCGTTTTGACTAAGGATGACATTAATTGTTAGCTGTTTTGAAAGCCTCTCTCTATAT
A_73_116963,A_73_P112816|317651	0.00116298	1.04353e-05	up	1.54447	1.54447	0.62711	CATHL6	Bos taurus cathelicidin 6 (CATHL6), mRNA [NM_174832]	TTGGGGTAAATTGTGAGCCCATGGAAGAATCCTGTGTGTGTCCTCCCTGGCTCAGGCTTT///AGGACGATGAGAACCCAAACATCCCGAAGCCTGTGAGCTTCAGGGTGAAGGAGACCGTGT
A_73_104390	0.0459439	0.00789414	up	1.54427	1.54427	0.626928		Rep: Noelin precursor - Rattus norvegicus (Rat), complete [TC402099]	TGGTTTCCAAAGGGAAAGAAATGCTCCTGTGGGCAGCAGTGTGCGGAAAGTACATTTTTT
A_73_P487713|536051	0.0396155	0.00626677	up	1.54373	1.54373	0.626417	BRAF	PREDICTED: Bos taurus B-Raf proto-oncogene, serine/threonine kinase (BRAF), transcript variant X2, mRNA [XM_002687002]	CAGCATGTAGGAGGGTAGGGACAAAAGAAAGTGAACAAATGTTTGCTTATATATTTGTTA
A_73_P084606|538519	0.023101	0.00266575	up	1.54264	1.54264	0.625399	MKNK2	Bos taurus MAP kinase interacting serine/threonine kinase 2 (MKNK2), mRNA [NM_001205275]	TCTGTACATAGGCCTTCCCCACCCGTCAGATCTAAAAAGATTTTTTAAGCTATTGCCCGC
A_73_P491598,A_73_108404|520147	0.0047192	0.000161754	up	1.54255	1.54255	0.625319	LHFPL3	Bos taurus lipoma HMGIC fusion partner-like 3 (LHFPL3), mRNA [NM_001104984]	CAGCTCACTGGAAACTATCATTGAATAAGAGCAAATGACATTCATGAGAAATCACATTCA///GCTGCCCTCGGGCGCCTTCAAAGCCGCCTCCTTTTTCATCGGCCTCTCCATGATGCTCAT
A_73_117798|515386	0.0258859	0.00322215	up	1.54195	1.54195	0.62476	UBE3D	Bos taurus ubiquitin protein ligase E3D (UBE3D), mRNA [NM_001075711]	ATTCAGAGGGGATGCTCAGTAAATAAATGTCTGTTGAATGCCTGATTGTCAAATTAAAGG
A_73_101940|281654	0.0047192	0.0001614	up	1.54163	1.54163	0.624458	CABP2	Bos taurus calcium binding protein 2 (CABP2), mRNA [NM_174255]	CACCAAGCCCCCTTGCCCAGCTCTGTTTCTCTGACAATAAAGCATGTTCGAGCTGGGGGA
A_73_P324341,A_73_107634,A_73_P365756|532824	0.0068038	0.000314081	up	1.54118	1.54118	0.624035	EEFSEC	Bos taurus eukaryotic elongation factor, selenocysteine-tRNA specific (EEFSEC), mRNA [NM_001083464]	AAGAAGATGCAGAAGACCCTGGAGAGCACCAAGTTCCGCGGCGCACCTGTCATACCTGTT///CGTCTTGAAAGGCTCCGGGTGTCCCAGGCTGCCCAGTTGGCAGCCGCAAATAAATGCCCA///AGCCCGTGCTGGACTCCTTCGACTTCTCCCGCGAGTACCTCTTCCAGGAGCAGTACCTCT
A_73_115466,A_73_P039196|613446	0.01599	0.00148378	up	1.54116	1.54116	0.624015	PLLP	Bos taurus plasmolipin (PLLP), mRNA [NM_001099123]	GAAAGTAAGGCCTTGCTGGTGAGCTGCCTTGTGCGTGGTGGTAACTTTTTGTTTTTTACA///TGACAATCATCTTCTTTGTCCTCTACCTGTTTCAGCTGCACATGAAGCTGTACATGGTGC
A_73_105799	0.00622485	0.000266915	up	1.54074	1.54074	0.62362		Rep: Cat eye syndrome critical region protein 1 homolog precursor - Sus scrofa (Pig), partial (80%) [TC413235]	CACTGCAAGCCAGGAACCTAGACTGCCCCTTGCCCGGTCGGCCCTCAATAAACATTGTTT
A_73_P081586|788673	0.0099816	0.000631711	up	1.54073	1.54073	0.623613	HECA	hdc homolog, cell cycle regulator [Source:HGNC Symbol;Acc:HGNC:21041] [ENSBTAT00000034262]	TTTTCTAATTGAAAGGAGAGTTCCTTTGTGTACTTGTGCCTGCCCCTTGCCCTCTCTTGA
A_73_P382521,A_73_103443|504652	0.0011059	9.45859e-06	up	1.54034	1.54034	0.623247	TK1	Bos taurus thymidine kinase 1 (TK1), mRNA [NM_001097572]	ATCGGAGGAGCAGACAAGTACCACTCCGTGTGCCGCCTATGCTAATTCAAGAAGGCCTCG///GCTTGTCTTCTAAGGAGGTGGGGGCTGTGTGTGTGTGTGGAACTGGTAACTAATATTAAA
A_73_P395506,A_73_P049851|784362	0.0463679	0.00802577	up	1.53975	1.53975	0.622694	SCEL	Bos taurus sciellin (SCEL), mRNA [NM_001102332]	CCTGGACAGTCTTATTAAAGTGACTCCCTCAGCAAAGAAAAGCAGTGAACAAGGTCTTGA///GTTCTTTAGCATGCTGTACCTATTCCTACTACATAGCATTTTATATTTACAGATGGCTTG
A_73_104899,A_73_P340111|614841	0.0042235	0.000127706	up	1.53909	1.53909	0.622081	FAM174B	Bos taurus family with sequence similarity 174 member B (FAM174B), mRNA [NM_001076350]	TCTTCAGTTAGTAACATCCGTTGTTTCTCTGCCCTGTCAGCGTTCTACGTTGTTGGTCTT///ATTTGACATCAAATACAGGTAAAACTTGTTCACCAGCGTGTCGGCATCCTGTGGCAAGCT
A_73_119309	0.0151026	0.00135053	up	1.53904	1.53904	0.622033			CTGCCTCATGCCCCTCTTGAGCACTGATGATAATAAACTCCCCTGTTGTTGCTCCCCTAA
A_73_P047256|281553	0.0315296	0.00436527	up	1.539	1.539	0.62199	TSHR	Bos taurus thyroid stimulating hormone receptor (TSHR), mRNA [NM_174206]	ATGGACACCGAGACTCCTCTTGCCCTGGCGTACATTATCCTTGTTCTGTTACTCAACATC
A_73_118665	0.0299936	0.00403922	up	1.53866	1.53866	0.621675			GCACCACTGACGCTGGGTCAGCCCCAAGCCCTGCTCCAAGTTGAATAAGAAATCGCCATA
A_73_111685|540853	0.000650871	2.63545e-06	up	1.53802	1.53802	0.621072	SNAP25	Bos taurus synaptosome associated protein 25 (SNAP25), mRNA [NM_001076246]	ACGGCATGTAATATTAAATTCCTCCTGTCTCCTCTGTCAGTTTGTGATGTGATTGACATT
A_73_P322881,A_73_101356,A_73_P362916|281860	0.0199699	0.00209138	up	1.5377	1.5377	0.62077	IL1RN	Bos taurus interleukin 1 receptor antagonist (IL1RN), mRNA [NM_174357]	ATCTGGAGATGAGATCAAGCTCAAGTTAGAGGCCGTGAACATCACTGACTTGAACCAGAA///TGGAAAGTGTCCTGTTCTCTGTGACTTAAGCTTTGTTTTAAGATAAAAACTTGAAACCTC///GGATACCACTGAGCAATTAACGCTTTCACTTTTCAACCTTTAACAATGAAAAGTTGGCCT
A_73_P040501|615411	0.0141195	0.00119684	up	1.53707	1.53707	0.62018	CMKLR1	Bos taurus chemerin chemokine-like receptor 1 (CMKLR1), mRNA [NM_001145235]	TGGGTCAGGACTTCAAGAAGTTCAGGGTGGCCCTCTTCTCCCGTCTGGTCAATGCCCTAA
A_73_111988|614456	0.0154645	0.0014012	up	1.53638	1.53638	0.619535	KRT6A	Bos taurus keratin 6A (KRT6A), mRNA [NM_001083510]	TTATCTTCTCTCTCCCAAAACCTGTTACCCATGAGGTTCCCTTGTTCAGCATTGGAAGGT
A_73_101124|522018	0.0324981	0.00458373	up	1.53573	1.53573	0.618927	NLRP12	Bos taurus NLR family, pyrin domain containing 12 (NLRP12), mRNA [NM_001192551]	AGGCTGCGGATTTTGTGGTTGAAGATCTGCCTCCTCACTGGTGCTGCGTGTGAAGACTTG
A_73_P052316,A_73_100476|521163	0.00241142	4.06967e-05	up	1.53571	1.53571	0.618909	ATP4A	Bos taurus ATPase, H+/K+ exchanging, alpha polypeptide (ATP4A), mRNA [NM_001144089]	GGAGTTCACAGCTCCTATGAGGTGGGTCTCTCCTTAGGACTCCAGGCCAACAAGAGTCTT///CGTGGACCAGGTTAACCGGAAGGATGCCCGTGCCTGTGTGATTAATGGCATGCAGCTGAA
A_73_119252,A_73_P234142,A_73_P447561|513585	0.00174185	2.2969e-05	up	1.535	1.535	0.618241	C14H8orf33	Bos taurus chromosome 14 open reading frame, human C8orf33 (C14H8orf33), mRNA [NM_001046153]	AAGGATGTCCTCTCAAGTGGTATGGCGCTCCATACCATTGAGTCCCATTGCTGTAATAAA///AGTTTAGGTTTAATTTCTTTTAGCCTCTTCCCTAGAGTGGCCACCTCTGCAGTGATGTGG///AAGCAGAAAGAACAAGCTCTTGGAGCCATCCGAACCTTGCGCAGCCAGAGAACCCCTCTG
A_73_P352151,A_73_P077391|615880	0.00398903	0.000113557	up	1.53466	1.53466	0.617924	SLITRK1	SLIT and NTRK like family member 1 [Source:HGNC Symbol;Acc:HGNC:20297] [ENSBTAT00000054494]	CCAGTTTTACCATCTATTTCTGCATGGCAATTCCCTCACTCGACTTTTCCCTAATGAGTT///AAACTAAGGATTCTCATTCTCAACAACAACTTGCTGAGGTCCCTACCCGTGGACGTGTTT
A_73_P061576,A_73_106332|517425	0.000929105	6.06632e-06	up	1.53369	1.53369	0.617003	SLC25A45	Bos taurus solute carrier family 25 member 45 (SLC25A45), mRNA [NM_001205840]	TGGGAATCTATTTCGTCACCTATGAGTGGCTGTGTCGCCAATTCACGCCGGACGGCCAGA///CGTCCTGTGACTTTGCCCCTTTAAGAGCTGCCTGGTGCTAACCACCCTCCCTGGATTTGA
A_73_107738,A_73_P425526,A_73_P333276,A_73_P452126,A_73_105268,A_73_P055396|282358	0.0392935	0.00617834	up	1.53317	1.53317	0.616518	SLC2A3	Bos taurus solute carrier family 2 member 3 (SLC2A3), mRNA [NM_174603]	AAATGGAAAAGCCTTAGTGCATTGCCTTGCATACTTAATAAATTATGTTGCTTGCGTTCA///GCATGGAATTTTTTCCAGTTCTCAGTGACCAGGTTGTGAATAATTTCCAAATGGATTTTT///GAAAGTCCTAGATTCTTGCTCATTAACAGAAAGGAGGAGGAGAAGGCAAAGGAGATCCTC///ATTGGAGGATGCATGATGTGGTGTATGAAGTTTGCACGTTGCCTCTTAACATTTCTATCC///CGCTCAGAGGATCCCAAGGCTGGGGTTAGTCGTTGTGTTCAATGGCTTTTAAAAATTCAT///TTCAAAGTTCCTGAGACCCGTGGCAGGACTTTTGAGGAAATTACACAAGTCTTTGAAGGA
A_73_103291	0.0150299	0.00134001	up	1.53307	1.53307	0.61642		Rep: Transcription factor Sp4 (SPR-1). - Canis familiaris, partial (97%) [TC479076]	CAGGCACAAAGAGGTTGAGCTTGTTATTCATGTCGGTCCCCTTCATCTCACTTCAGTTTT
A_73_107637|519016	0.00125929	1.3111e-05	up	1.53299	1.53299	0.616345	CDT1	chromatin licensing and DNA replication factor 1 [Source:HGNC Symbol;Acc:HGNC:24576] [ENSBTAT00000054406]	AGGAGGAAGCAGCTGTGCCCTCCCATGCCCCGGATCTTGTATTTGGTCTCTAGACTGTCA
A_73_120610	0.0140541	0.00118556	up	1.53215	1.53215	0.615561		LB0289.CR_G20 GC_BGC-28 Bos taurus cDNA clone IMAGE:8223022, mRNA sequence [DV915946]	GCATCTGTGTTCTGGGCCTCATCTTGACTCTGCCCAGATCGCTCTAATTTTATACACAAA
A_73_104151|508202	0.00241142	4.059e-05	up	1.53181	1.53181	0.615234	KRT79	Bos taurus keratin 79 (KRT79), mRNA [NM_001075348]	CTGAATCTACCTATGTCCCCCTCCCCTGTCTGTGCTGTGATGTATCTCAATAAATGGAAA
A_73_120398,A_73_P478588,A_73_113213,A_73_P096976,A_73_P106151|526956	0.00211486	3.29355e-05	up	1.53179	1.53179	0.615217	ACAD11	Bos taurus acyl-CoA dehydrogenase family member 11 (ACAD11), mRNA [NM_001075893]///Rep: Acyl-CoA dehydrogenase family member 11 - Pongo pygmaeus (Orangutan), partial (74%) [TC419607]	TTGGCTCAGTTACATTCCTTGAATATACAGTCATTGCAGCTGGAAGGATATGGTAGAGGT///ACCAATTTAATACTAGGTGAAGGTAGGGGATTTGAAATTGCCCAAAGCCGGCTTGGACCT///AAACACACTACTTGTAAAGAAATCATGAAGTAGATTGGAGAACTAAATCATAAGCATAAA///AAGAAAGAGATTGCAATGATTAAAGTGGCTGCCCCCCGTGCCGTCTGCAAAATTATTGAC///GCCTTCTATAAGGCATCCTTTTTTAGGTGGATAAAATCTTATAACCCAAGCTATTCAATC
A_73_P299566,A_73_121200|540009	0.0286288	0.0037672	up	1.52993	1.52993	0.613461	GFRA3	Bos taurus GDNF family receptor alpha 3 (GFRA3), mRNA [NM_001083747]	AAATGAATCTCAGCAAACTGAACATGCTCATACCAGACTCGGACCTTTGCCTCAAGTTCG///TAAGGCCACAGCCTTGGGTGCCCACTCTTTTCTCCTGTACTCTTACCTTGATTCTGCTCT
A_73_P175717	0.0393705	0.00619495	up	1.52979	1.52979	0.613336		770406 MARC 6BOV Bos taurus cDNA 3', mRNA sequence [CB536108]	GGGTATGGTGAACATGGTGGTCTTGGTGGCGGACATTTATCCAATAAAATGCTACCTGTT
A_73_117098	0.0284494	0.00372808	up	1.52923	1.52923	0.612801		fms related tyrosine kinase 4 [Source:HGNC Symbol;Acc:HGNC:3767] [ENSBTAT00000040219]	TGGCTACTTGTCCATCATCATGGACCCCGGGGAGGTGCCTTTGGAGGAGCAGTGTGAATA
A_73_117129,A_73_P050336|505865	0.0104978	0.000697395	up	1.52922	1.52922	0.612795	FOLH1B	Bos taurus folate hydrolase 1B (FOLH1B), mRNA [NM_001101858]	TGCAGGCTGCAGCAGGGACTCTGAGAGAAGTCGCCTAAGAAATTTCTTTGTAAAATGCAT///GTACTGCTGACCATATGCCTTCCCCTTCTTTCAGAGATACTCACTTTCTTGAATTTTATG
A_73_P037306,A_73_115098|509772	0.0202275	0.00214478	up	1.52895	1.52895	0.612544	HPCA	Bos taurus hippocalcin (HPCA), mRNA [NM_001025328]	GCCCACGTGGAGCATCTCTGTTCTTTTTAATGACTTCAGAATAAAGTCTCCTTTCAGTGC///AAATGGACACAAACAACGACGGCAAGCTGTCCCTGGAGGAGTTCATCCGCGGGGCCAAAA
A_73_P114886	0.0360137	0.00538898	up	1.52837	1.52837	0.611997		GB	TCTAATTCCAGCGAAGGCTGGTGGGGAGCGGAGGCTGAGGATTAAAGAGGAGAGCGATTT
A_73_P043331|785152	0.0133457	0.00108131	up	1.52792	1.52792	0.611572	PRICKLE1	Bos taurus prickle planar cell polarity protein 1 (PRICKLE1), mRNA [NM_001102534]	CCTAACTTAGTGTCCTAGTGGTATCTCAGACCTTTAGGAAGGTATTTAATAAATGCTTAA
A_73_P494287	0.049494	0.00891598	up	1.52647	1.52647	0.610195		PREDICTED: Bos taurus ankyrin repeat domain-containing protein 26-like (LOC786977), miscRNA [XR_083263]	AAGATGAAAAGAACAGCCCTCATTCTTGCTGTCAGTTATGAGTCAAATGCAGTCAGTCTT
A_73_105271|511870	0.00859651	0.000481903	up	1.52629	1.52629	0.610033	CNFN	Bos taurus cornifelin (CNFN), mRNA [NM_001075542]	GGCAGCCCTCACCTTTTGTTTGCCCTGCGCGCTCTGTCAGATGGCGCGGGAACTGAAGAT
A_73_119393	0.00749328	0.000379957	up	1.52581	1.52581	0.609572		Rep: MAGED4B protein - Homo sapiens (Human), partial (5%) [TC483418]	GATTTTCTAGCCCAGGCTCCCCCCATCATCAGTGCTTGGAGATCTCTTGTGCCCTCACAA
A_73_P489938	0.00752027	0.000383257	up	1.52568	1.52568	0.609449			CTCATGAGGATGCTGCAGCATTTTATGGTCTGCCTCTCATTGTCTCCAGCCTGGTCACAG
A_73_P043421|785815	0.016314	0.00153485	up	1.52548	1.52548	0.609267	HR	Bos taurus HR, lysine demethylase and nuclear receptor corepressor (HR), mRNA [NM_001102535]	ATCCTTGCTCCCTCCTCTACCTCCTTCCTTCTGGATTTCCATTAAAGGCTGTTGTTTTGT
A_73_118691,A_73_P292681|281912	0.0221285	0.00248971	up	1.5254	1.5254	0.60919	MFAP2	Bos taurus microfibrillar associated protein 2 (MFAP2), mRNA [NM_174388]	GTCTGCTTGAATCTCCTACAGCCCCTGGGCGGAGACCACCTTTGTTTTATACAAAATTAA///TCTCAACGAGGTCTGCTTCTACAGCCTCCGCCGCGTCTACGTCGTCAATAAGGAGATCTG
A_73_P079071,A_73_P102501|282856	0.0286356	0.00377225	up	1.52522	1.52522	0.609016	PCK2	Bos taurus phosphoenolpyruvate carboxykinase 2, mitochondrial (PCK2), mRNA [NM_001205594]///Rep: Phosphoenolpyruvate carboxykinase - Bos Taurus, complete [TC425177]	TAGGCTTGCAGAAACTATGAGCAACTTAACAACACTCTCATCCTCTGGGTGCTATGGGAT///CAGGCCCCAGAGCTTTCCCCACATGCTGCCTAATAATGAAATGCTCATTTATATAAAAAA
A_73_P461376,A_73_110072|100124430	0.0170066	0.00164387	up	1.5241	1.5241	0.60796	ARHGAP4	Bos taurus Rho GTPase activating protein 4 (ARHGAP4), mRNA [NM_001102540]	ACACCAAGTTCTTGGAGCACAAACTCAAGTGTACAAAGGCTCGCAATGAGTACCTGCTAA///CCAGCTTCTGGGGCTTCTTGGCACAGGGCTGTGTGGCTTGGGGACCTGCATCTTGGAAGT
A_73_P401211,A_73_112409,A_73_114983|280968	0.00111532	9.58183e-06	up	1.52408	1.52408	0.60794	TPPP	Bos taurus tubulin polymerization promoting protein (TPPP), mRNA [NM_173976]	TTTGAGCAGTTCAAGGAGGCGCTGGAGGAGCTCGCCAAGAAGAGATTCAAAGACAAGAGC///CATGCCCATGGACCAAGGCTGTGCTAAGGGTGGGCACTGAGCTGAGGGCTGCTGTGCAAA///CATACCTCCTCGTGTGCTCCCTGTTGTTAACATTGTGTCCGGTTGGTAAAGTGACAAATA
A_73_P097771	0.00814056	0.000437023	up	1.52403	1.52403	0.607887			GATGTAAGTGCAACATTGTAAATCAGCTATGTCTGTGTGCTCAGTCCTGTCCAGCTCTTT
A_73_P490528	0.0458509	0.00787466	up	1.52379	1.52379	0.607667			GACCGAAGAGACCCCAGGGGTGGGTGGGCGGGGCCAGGAGCCAAGGGACATAGTCCTTGA
A_73_104611|539207	0.0290574	0.00385545	up	1.5236	1.5236	0.607481	BHLHE23	basic helix-loop-helix family member e23 [Source:HGNC Symbol;Acc:HGNC:16093] [ENSBTAT00000014445]	AGACAAGTGCGCCGCCTTCTCCGGGACGCCCTCGGCGCTTTGCAAACACTGTAACGAGAA
A_73_102557|512922	0.00120268	1.12854e-05	up	1.52353	1.52353	0.607417	SPSB4	Bos taurus splA/ryanodine receptor domain and SOCS box containing 4 (SPSB4), mRNA [NM_001192337]	ACGGCACTGCCTCCTGCCACCTTAATGTGAATTGACTGATGAATGAAGAGCGTTTCTAAT
A_73_105359	0.0190695	0.00194787	up	1.52311	1.52311	0.607022		GB	CTGCTGTGTACTGCCATATTACCAGTGGTGTGGGTTACAGGGGTCCCTGCATAAATAAAC
A_73_111755	0.0200714	0.00210957	up	1.52297	1.52297	0.60689		Rep: PREDICTED: zinc finger protein 629 - Pan troglodytes, complete [TC401006]	CGACTCTTTTGCCCCCACTCATCTGACTTGTCCCCGTGGAGTGAAGAAAGGCCCCACTTT
A_73_P119976	0.0103134	0.00067181	up	1.52293	1.52293	0.606853		152134 MARC 4BOV Bos taurus cDNA 5', mRNA sequence [BE664636]	GTGCTCACCTCCCGCATTCTAGGCTCTATACTTCTGTTAATATAGCCAAGATCCCTATGA
A_73_P034861|617773	0.0245381	0.00296725	up	1.52286	1.52286	0.606779	C26H10orf120	Bos taurus chromosome 26 open reading frame, human C10orf120 (C26H10orf120), mRNA [NM_001076476]	ATGCCTGGAAAGAGTACATGTGCAAAGTTGCTCCCCATCATTATTAAAGCTTTATTTATC
A_73_104780	0.0257525	0.00319768	up	1.52242	1.52242	0.60637		dynein axonemal heavy chain 1 [Source:HGNC Symbol;Acc:HGNC:2940] [ENSBTAT00000066095]	TGAAGGAAGGTCACCCCTCCTGATCTGTCAGTACTGGGTGCCAAGGATCCAGCTCCTCTT
A_73_P303471,A_73_P119391|506408	0.015199	0.0013632	up	1.52184	1.52184	0.605815	LOC506408	zinc finger protein 786 [Source:HGNC Symbol;Acc:HGNC:21806] [ENSBTAT00000019646]///PREDICTED: Bos taurus zinc finger protein 786 (ZNF786), mRNA [XM_582851]	AAGAAGCTCATTACTATTTCCAAGTAGATCCTCTTCAGAGCCACCGTTCCTGTAAACCCT///AAGCATGGGGTGACTGTTAAATGTCAGCTCTTCTCTTCATAGTATGAACATAAGCAGGGG
A_73_P376391,A_73_100236|540541	0.0244323	0.00294135	up	1.52176	1.52176	0.605742	LHFPL4	Bos taurus lipoma HMGIC fusion partner-like 4 (LHFPL4), mRNA [NM_001076226]	TAGTGGTAGAGAAGGGGGTGGTTTCCTTTGGAGTGGTTGGACGGTTTCCCTGTCACCGTC///TGCTGCTGCTGAATTTGAGCTTCAGTGCAGGTGGAATGATGTTCAAATAAAGACACACTT
A_73_109811	0.00462533	0.000152765	up	1.52169	1.52169	0.605673		LB01645.CR.1_G22 GC_BGC-16 Bos taurus cDNA clone IMAGE:8382576 5', mRNA sequence [EH172310]	GTAAGCTTTGCCTCCCTCCTAGCTATATTGTGTTAGTCCCATATCCTTTGGATTCCTGCT
A_73_106899|613918	0.00518439	0.000193202	up	1.5208	1.5208	0.604832	FAM155B	family with sequence similarity 155 member B [Source:HGNC Symbol;Acc:HGNC:30701] [ENSBTAT00000045942]	TCTACATCCTTGTCCTCGTGCTCCTGCATACCATGGTGTCCTTCTCCAGCAGCCAGAGTG
A_73_102219	0.0485849	0.00864659	up	1.52055	1.52055	0.604595		PREDICTED: Bos taurus kinesin family member 25 (KIF25), mRNA [XM_015464911]	TCGGAGGTGATGCAAAGTTACAGGTGATCGTGTGCGTGTCCCCAGGCCAGAGGCACGTGG
A_73_P212227	0.0101749	0.000652035	up	1.52002	1.52002	0.60409		Rep: PREDICTED: solute carrier family 41, member 3 - Pan troglodytes, partial (3%) [TC474730]	TCTTTATCAGCGTGTGTAATCTGCTCCACACTTTCTACCTGTTGATCCCTGACTCATGAT
A_73_P453251,A_73_114880,A_73_P463406,A_73_P266676,A_73_P376846|511056	0.000252147	1.77083e-07	up	1.5199	1.5199	0.60398	HAUS8	Bos taurus HAUS augmin like complex subunit 8 (HAUS8), mRNA [NM_001075487]	CACTTTACGGCACTTAGCCTAGGCCGTATAGTTAATTTTGTGTGATAATCTCATTTGATA///CTAGCCGTATAGTTAATTTTGTGTGATAATCTCATTTGATAATTTAACAAATAAAAACTG///AGTCTACCTTGCTGGAGGGGCATGACACTGCCTTGTCTGACCTGGATCTCTCAGCCATTC///AAACTCCAGAAAAAGGCTTATGAGTTGAAGCGCAGGCTTCTCCTCTGTCAGAAGAAGAAG///GGCCAAGGACACTGGGTTTCTTTCCCGTTTTTGACACTTATGAATAAAGTCACCTTAAAC
A_73_P101336,A_73_P331301,A_73_104241|353110	0.0103435	0.000677719	up	1.5194	1.5194	0.603501	NGFR	Bos taurus nerve growth factor receptor (NGFR), mRNA [NM_001102478]	TACCAGGACGAGACGACCGGCCGCTGCGAGGCGTGCCGCGTGTGCGAGGCGGGCTCGGGG///TACATAGACCACACTTCTTTGACCTGAATCAGTAACAGGAGGAGGAAACTCACCTGCTGA///TGCCCCTTGCATCCTGTGTAATCATTTCTTGGGTCCTCCTGAAACCTACACATAAAACAT
A_73_100072|540868	0.0486518	0.00866407	up	1.51915	1.51915	0.603261	CYP26B1	Bos taurus cytochrome P450, family 26, subfamily B, polypeptide 1 (CYP26B1), mRNA [NM_001192793]	ACGGCCTCAGCGTCAAGTTCTTCGGCCTGGACTCTAACCAGAACAAGATCCTGCCAGAGA
A_73_P036551,A_73_P150766,A_73_P269341|507138	0.00584381	0.000240536	up	1.51902	1.51902	0.603137	IFI27	Bos taurus putative ISG12(a) protein (IFI27), mRNA [NM_001038050]	GGTGACAAGTGCCAAACGCTGCACCCCCAGAGGAAAATGAGAAATAAAAACGAGTTGTGG///TGTCCAAATTTTTGGGCCTGTAACAGTCCCCTGTCGCTCCCTCGGCAGAGAAGAGGACCA///ATTCACCAAGGCTGTCCGCTTAGCCTCTAACCTGGCTTCCAAGATGCTGTCTGCAGGGAG
A_73_P059031	0.00898632	0.000521543	up	1.51883	1.51883	0.602956		PREDICTED: Bos taurus patched domain containing 3 (PTCHD3), mRNA [XM_594595]	GGACATTTTTCAAGATTATGTTTCTTGTGATGGTATTTGGAGCTGCTCATGGTCTAATTT
A_73_118699|515049	0.00564905	0.000225325	up	1.51854	1.51854	0.602685	NECAB2	Bos taurus N-terminal EF-hand calcium binding protein 2 (NECAB2), mRNA [NM_001098977]	ATACTTCCAAATAAGAGTGTCTCTTCCTGCTGTTCAAAGTGAAGGCGCACCCCTCCCCTG
A_73_P148916	0.00091144	5.84658e-06	up	1.51843	1.51843	0.602576		AM015439 KN-252-liver, Bos taurus Bos taurus cDNA clone C0007411c22 5', mRNA sequence [AM015439]	TGCCTACCTGGCAACTGATTGTGAAGATTAAATGATAGGAAAAATACTGTAAAGTGCTTA
A_73_101542,A_73_P069026|538044	0.0263211	0.00330656	up	1.51784	1.51784	0.602022	SAXO2	stabilizer of axonemal microtubules 2 [Source:HGNC Symbol;Acc:HGNC:33727] [ENSBTAT00000004426]	AAACTACAAATTCCCAAGGTCATAAATTCTTCCGCAAGATCGCTCCCGCGGTGAAGGCCT///CCTGGCTACCTGTTTGAAACTACAAATTCCCAAGGTCATAAATTCTTCCGCAAGATCGCT
A_73_102933|521920	0.0302283	0.00408472	up	1.51756	1.51756	0.601756	SULT1B1	Bos taurus sulfotransferase family, cytosolic, 1B, member 1 (SULT1B1), mRNA [NM_001075823]	AAGCGAGATGTTATAACTGCTAAAGTTCCAATGTTGGAACTGGCTCTTCCTGGACTAAGG
A_73_P122761,A_73_120497|533224	0.00051691	1.71711e-06	up	1.51692	1.51692	0.601146	AAMDC	CR453440 Normalized and Subtracted bovine embryonic and extraembryonic tissues (bcaz [CR453440]///Bos taurus adipogenesis associated Mth938 domain containing (AAMDC), mRNA [NM_001037473]	CGAATGTACATATACTGCAGCTCAAATGTGTTCTCAGGCCTTTCTTGATCACCTCATTTA///GAGGGGTCTTCCATTCCACCTGCTGATGGAGGCTTAAGAGAATAAATCACTGAACAATGA
A_73_109859	0.00922485	0.000545443	up	1.51643	1.51643	0.600682		4097030 BARC 10BOV Bos taurus cDNA clone 10BOV36_D13 5', mRNA sequence [CK956820]	TGGAGGGTCTTATTTATGCCTGTTTCTGTGTAACTGTCTTCGGGGCTGAAGGTCGCGTGC
A_73_P212792	0.0421619	0.00689981	up	1.51535	1.51535	0.599646		PREDICTED: Bos taurus uncharacterized LOC100849813 (LOC100849813), miscRNA [XR_139161]	ACTTCCGGGAGACTGCCAGCCTTTGGACTGCATCCCTGGAGTTCTGAGAGACTGTGACTT
A_73_P063070	0.0351334	0.00518482	up	1.51529	1.51529	0.599598			AATACTAAAGAGGTGTGTGGTGGCTTTTTTAAAACAGTGCAAAGTGCCGATGAAGTTCTT
A_73_120792|784029	0.035711	0.00533279	up	1.51528	1.51528	0.59958	TDGF1	Bos taurus teratocarcinoma-derived growth factor 1 (TDGF1), mRNA [NM_001080358]	TGCCTTGAAATAGTGAATAGATTTCCCTGTGGTCCCTAAAAAGATTTCCTTGAAGCACCA
A_73_120495	0.0469201	0.00818429	up	1.51527	1.51527	0.599573			CAGGGGCATTTCCCACGAAAGACCTCAGCGAGAGGTCCTCACCAGCTTCTCTCTTCTCTT
A_73_P093616|527415	0.0165522	0.00157496	up	1.51523	1.51523	0.599539	LOC527415	GB	TTCCATTGTCCCTCATTCTGGCCTCATATGTTCGCATCTTCACTGCTATCCTAAAGATTG
A_73_108439	0.00192563	2.79396e-05	up	1.51492	1.51492	0.599241		lectin, mannose binding 1 like [Source:HGNC Symbol;Acc:HGNC:6632] [ENSBTAT00000028561]	TAGAGGGTTTGGCTGGTGTCTTCTGCCTCTGGGTACCTAGCTCCTACCCACACCTTAGCT
A_73_102980	0.0133457	0.00108115	up	1.5133	1.5133	0.597695		Rep: Protein kinase - Stigmatella aurantiaca DW4/3-1, partial (6%) [TC418065]	AGCAGTAGCTTGGCGTCTCGGTGTTTAAAACGGGAAATGACCTGTGGCGTCTCCGCGTGT
A_73_P073946|100139386	0.0136967	0.00113381	up	1.51316	1.51316	0.597568	20ALPHA-HSD	Bos taurus placental and ovary 20alpha hydroxysteroid dehydrogenase protein (20ALPHA-HSD), mRNA [NM_001167660]	AAATGGAAAAATTATATATGACTCAGTGGATTTCTGTCGCACGTGGGAGGCCCTGGAGAA
A_73_P037896|618714	0.0355351	0.00527939	up	1.513	1.513	0.597412	LY6D	Bos taurus lymphocyte antigen 6 family member D (LY6D), mRNA [NM_001076517]	AGACTGTGATCAGGGTGGAGCCTCTGTCTGGGAACCTGGTGGAGAAGAACTGCTCAGTGT
A_73_P202772	0.035651	0.00530394	up	1.51275	1.51275	0.597175		LB02444.CR_M10 GC_BGC-24 Bos taurus cDNA clone IMAGE:8699892 5', mRNA sequence [EV644158]	GAGAACAAAGCTTTCTGCCTACCCTCATATTGCCTTCCCTGTAATACAGCCCTTATGAAG
A_73_P307751|528253	0.0262635	0.00329322	up	1.51274	1.51274	0.597168	JARID2	jumonji and AT-rich interaction domain containing 2 [Source:HGNC Symbol;Acc:HGNC:6196] [ENSBTAT00000017189]	AAAGGAAGCTTAAGACAGAAGATTTTCTTACCTTTCTCTGCCTTCGAGGTTCTCTTGCGC
A_73_106078	0.0111646	0.000800316	up	1.51272	1.51272	0.597144		CR848869 Normalized and Subtracted bovine endometrium tissues (bcbp) Bos taurus cDNA clone bcbp0001.m.21 5', mRNA sequence [CR848869]	GTGTGAGTATATATTTGCGTTTTAAATTTCAAAGAAAGCTATATTGTCTAACAGGGGACC
A_73_106814	0.00694568	0.000324609	up	1.51262	1.51262	0.59705			ATGGCAAACTGTGGACCACAGACCAAATTCAGCCTGCTGCCCACTTCTGTTAATAAAGTT
A_73_P130601	0.00352693	8.73989e-05	up	1.51251	1.51251	0.596948		bend_0A02-003-b06 Day 8 Uterus bend Bos taurus cDNA 3', mRNA sequence [CK727899]	TTCTGCAGCGACAGTTTCTAACTAACCAGACGTTTAAAGCCCCTCCCTCTAGAATATCTG
A_73_P149416	0.0240548	0.00286563	up	1.51219	1.51219	0.59664		157099 MARC 4BOV Bos taurus cDNA 5', mRNA sequence [BE668381]	GAACTAAGATCACATGTGATAGGCAGCTCAGCCAAAAAATAAAAATATCCTGCAGCTGGA
A_73_121237,A_73_P093471|518657	0.0231898	0.0026891	up	1.51219	1.51219	0.596636	TAL1	Bos taurus TAL bHLH transcription factor 1, erythroid differentiation factor (TAL1), mRNA [NM_001192495]	TTGCCTTTAGCCCCTCCCAAGCTGGCTGGGGTGGCTTTTGTGGCCACACTGTCCAAATAT///TGAAGTACATCAACTTCCTGGCCAAGCTGCTCAATGACCAGGAGGAGGAAGGCACCCAGC
A_73_100829,A_73_P256296|281777	0.00114173	1.00702e-05	up	1.51213	1.51213	0.596585	GAP43	Bos taurus growth associated protein 43 (GAP43), mRNA [NM_203358]	GCTCACGTCCGTGAGTCTGTCCTCTCCCACCCACTGGCCCTCTTTCTCTCTGTGTGGCAA///AAATTCAGGCTAGCTTCCGTGGACACATAACGAGGAAAAAGCTCAAAGGAGAGAAGAAGG
A_73_112653	0.000776117	3.7339e-06	up	1.51157	1.51157	0.596043		Rep: LOC534455 protein - Bos Taurus, partial (56%) [TC395371]	TTTCTGGAAAATAAGCAGCAGCAGCAGCAGCATGCTATTTGCGTTTCTAAAGAGAAAACA
A_73_P102111,A_73_P032196|317708	0.011896	0.000889815	up	1.51151	1.51151	0.595991	HTR4	Bos taurus 5-hydroxytryptamine receptor 4 (HTR4), mRNA [NM_001040485]	AAACCAATTATTTCATTGTGTCTCTTGCCTTTGCGGATCTGCTGGTTTCGGTGCTGGTGA///CAGCCTGGAAGAGACTTTGGAATGAGAAAGAAAAGATTGCTGTCAAACAATCCAAATGCC
A_73_119639|540981	0.00557492	0.000217236	up	1.5114	1.5114	0.595887	LOC540981	F-box and leucine rich repeat protein 19 [Source:HGNC Symbol;Acc:HGNC:25300] [ENSBTAT00000056997]	AAGCTTGTGCCCGGCTGGCAGCCGCCGGGCCCCCTGGCCCCTTCCGCTGCCCAGAAGAGA
A_73_100452	0.0150135	0.00133626	up	1.50973	1.50973	0.594286		Rep: Tyrosine-protein kinase SgK223 (EC 2.7.10.2) (Sugen kinase 223). - Canis familiaris, partial (48%) [TC418541]	TACCCCTTTCCCCGTGCCCTGCCTTGCCTTGGAAACATCCGTGTCTCTTGGGAAATGGTA
A_73_P049581|782382	0.0368803	0.00558379	up	1.50924	1.50924	0.593824	PLXNA3	Bos taurus plexin A3 (PLXNA3), mRNA [NM_001105013]	TGCCTCGACCACCTATTTATTTAATTTATCTCCACTCACCCTTTCCATATGTAAATACGG
A_73_116245|281207	0.0128854	0.00101439	up	1.50828	1.50828	0.592907	NPBWR1	Bos taurus neuropeptides B and W receptor 1 (NPBWR1), mRNA [NM_174074]	AGCCTGAGCTACGCCAACAGCTGCCTCAACCCTTTCCTCTACGCCTTCCTGGACGACAGC
A_73_116326	0.0241068	0.00287367	up	1.50806	1.50806	0.592693			AAAGTCATCACCAGCAAACAAAGAACTGTTGAGCTCTCTGTCCTCTGCTCTGTAAGGGAA
A_73_P030676|282572	0.00120513	1.15497e-05	up	1.50781	1.50781	0.592452	KCNJ8	Bos taurus potassium voltage-gated channel subfamily J member 8 (KCNJ8), mRNA [NM_001040482]	TTGAGAGTAATAACATTTTCCTGGTGGCCCCTCTGATCATCTGCCATGTGATTGACAAGC
A_73_P205852,A_73_P056231|618806	0.00711797	0.000343727	up	1.50768	1.50768	0.592328	LOC618806	Bos taurus melanoma-associated antigen 10-like (LOC618806), mRNA [NM_001206356]	AGCACATCTACATCATGGTCCCCATCCTGGGCCTCACCTGCAACGCAATGCTGAACAGTG///TGCTCAGGGTCAAACAAAGGGCTTTGAGGACCTTCCCACTGCAGTCTGCAGAGGCTGCAA
A_73_106650|100336895	0.0041241	0.000120081	up	1.50755	1.50755	0.592202	RHBDL1	rhomboid like 1 [Source:HGNC Symbol;Acc:HGNC:10007] [ENSBTAT00000022975]	CCTGCCCCCACCTCTTCCCTGAGACTTGCAGTCTGAGCCTTTTTGAAGAATAAATAAATA
A_73_P070481|101905933	0.0243095	0.0029099	up	1.50752	1.50752	0.592179	LOC101905933	PREDICTED: Bos taurus BCL2-like 10 (apoptosis facilitator) (BCL2L10), mRNA [XM_601350]	GGTCTGGTTTTTCCTCTCATACTGGACAGCAATAATCATAATCTACTTCTGGATAAAATT
A_73_111903,A_73_P383396,A_73_P468173,A_73_P257051,A_73_P326961|281410	0.0280469	0.00364321	up	1.50745	1.50745	0.592108	PLP1	Bos taurus proteolipid protein 1 (PLP1), mRNA [NM_174149]	ACCTGTCCCTGTTGCCATCTTGGGAGCCAAATATATTCTCTTTGGTGTACAAAACCGAGA///ATCTGCAAAACAGCTGAGTTCCAAATGACCTTCCATCTGTTTATTGCTGCGTTTGTGGGG///GTACCTCTTTTAGTCATTTTGCTTCATAGCTGGTTCCTGCTAGAAATGGGAAATGCTTAA///ATTAATGTCTCTGCGGACTCTCCCCTCTTACGTACCTCTTTTAGTCATTTTGCTTCATAG///ATCCATGCTTTCCAGTATGTCATCTATGGAACTGCCTCTTTCTTCTTCCTTTATGGGGCC
A_73_P074111|537251	0.0158141	0.00145642	up	1.50741	1.50741	0.592068	CHRNA4	Bos taurus cholinergic receptor nicotinic alpha 4 subunit (CHRNA4), mRNA [NM_001192900]	GGTGAATGCCCGTTTGTCTGCAGGGCGGTGTCACTGCCTGTCTTATTAAAGTTTAACCAG
A_73_P268621,A_73_P323136,A_73_111144|533256	0.00475712	0.000166744	up	1.50733	1.50733	0.591998	UNC5C	Rep: Netrin receptor UNC5C precursor (Unc-5 homolog C) (Unc-5 homolog 3). - Canis familiaris, partial (12%) [TC407208]///unc-5 netrin receptor C [Source:HGNC Symbol;Acc:HGNC:12569] [ENSBTAT00000039753]///PREDICTED: Bos taurus unc-5 netrin receptor C (UNC5C), transcript variant X1, mRNA [XM_005198591]	CAACACAAGAATTTCTTCACAACTTGTGTGTTGGTAATATGCAACTTGAAGTGTTTTGGT///TTACTGGCCACATATCAGGAAATTCCATTCTACCATGTCTGGAGTGGGTCTCAGAGAAAC///CCTTATCACTCTCTTTCCTCTCTTGGGACCAGTTGCCTTCCTGACTAGTTGCAAATTATG
A_73_116697	0.0204263	0.00218067	up	1.50715	1.50715	0.591823		Rep: Epiplakin - Homo sapiens (Human), partial (6%) [TC426979]	ACGTTCCTGTGTTTCACCTTGTTTTGATTGTAATCTCTTATATTTGTCTATTTCCATTAA
A_73_115729,A_73_P411496,A_73_P459006|280838	0.00174185	2.2644e-05	up	1.50684	1.50684	0.591526	PAEP	Bos taurus progestagen-associated endometrial protein (PAEP), mRNA [NM_173929]	GACTACAAAAAGTACCTGCTCGTCTGCATGGAGAACAGTGCTGAGCCCGAGCAAAGCCTG///GAAAAAACCAAGATCCCTGCGGTGTTCAAGATCGATGCCTTGAACGAGAACAAAGTCCTT///CTGGGGCCTCCTGCTTGGGGCCGCTCCTCCTTCAGCAATAAAGGCATAAACCTGAAAAAA
A_73_P115026	0.0065302	0.000291667	up	1.50661	1.50661	0.591308		TIFA inhibitor [Source:HGNC Symbol;Acc:HGNC:34024] [ENSBTAT00000023475]	TTGTCTGCTGCTTCCATCTCAGCCCCTCGCCTCTGATCTACAGGCTCCGCGCTGAGGAGA
A_73_P046926|615505	0.0189154	0.00192115	up	1.50542	1.50542	0.59017	TMEM176B	Bos taurus transmembrane protein 176B (TMEM176B), mRNA [NM_001099145]	TCTTCCATTCAGTGAACAGGTATTGTCACGTTTCCCCCAGTGCTGACTAAACAGAAGCAA
A_73_P115511|539550	0.0370463	0.00563121	up	1.50517	1.50517	0.589928	NPC1L1	NPC1 like intracellular cholesterol transporter 1 [Source:HGNC Symbol;Acc:HGNC:7898] [ENSBTAT00000061036]	AAGGCGCAGCTCATCCAGATCTTTTTCTTCCGTCTCAACCTCCTCATCACTGTGCTGGGC
A_73_120950,A_73_P269256|525741	0.00386877	0.000105324	up	1.50491	1.50491	0.589678	CAMKV	Bos taurus CaM kinase like vesicle associated (CAMKV), mRNA [NM_001075876]	TGTGGGTCTGCTCTGGTGTATGAAGGTCGGTGGGCTGTGTACCTGCTGAACCTGGCAAAT///AAATCCTGGCTGGTGATTATGAGTTTGACTCTCCATACTGGGATGACATTTCACAGGCAG
A_73_103641,A_73_P050181|281665	0.00920741	0.000541405	up	1.50481	1.50481	0.58958	CCKBR	Bos taurus cholecystokinin B receptor (CCKBR), mRNA [NM_174262]	GTACGCCTCTGCCTGTGTCAACCCCCTGGTCTACTGCTTCATGCACCGTCGCTTTCGCCA///CACTGTCCTAAAGTGGTCCCCTTGTTAGGGTACTGTATTAATAGATGCTTATTAAAATTT
A_73_P032771,A_73_P429736|100313956	0.00835814	0.000459121	up	1.50351	1.50351	0.588339	IFNT3	Bos taurus interferon tau-3 (IFNT3), mRNA [NM_001168275]	TCTTCATCAACCACCTTGCAAAAAAGGTTAAGAAAGATGGGTGGAGATCTGAACTCACTT///GCCTGCCCTGATGTTATCTGTTGTTGATTTATGTATTCCTTCTTGCATCTAACATACTTA
A_73_119874	0.049255	0.00883492	up	1.50271	1.50271	0.587568		Rep: TonB-dependent receptor precursor - Pseudomonas fluorescens (strain PfO-1), partial (3%) [TC432201]	ATGATTGCAATCGCTCCCGGACCATGTCTCGGTTTGGGGTGTGTTGTATGTGTTATATTA
A_73_110218|617031	0.00823404	0.000443928	up	1.50258	1.50258	0.587438	GALNTL5	Bos taurus polypeptide N-acetylgalactosaminyltransferase-like 5 (GALNTL5), mRNA [NM_001076441]	GAGTTAAGGAAACGATTGGGTTGCAAGTCATTTCAGTGGTATTTGGATACTATCTTCCCA
A_73_P089521	0.0419472	0.00684865	up	1.50246	1.50246	0.587327		GB	GTTTTATAGTCTTTTCAACCCCATGCTGAACCCGCTGATCTACAGCTTGAAGAGCAAAGA
A_73_116541|618642	0.0204164	0.00217662	up	1.50197	1.50197	0.586859	TMEM174	Bos taurus transmembrane protein 174 (TMEM174), mRNA [NM_001206297]	TACCCTCCGGAGAATGCTGCCTTTGTTGACGACCAGGACTACCCTTCCTTTGCGGACACT
A_73_P067671|538483	0.0279819	0.00362981	up	1.50152	1.50152	0.586422	CIC	PREDICTED: Bos taurus capicua transcriptional repressor (CIC), transcript variant X4, mRNA [XM_005219390]	TCTCGTTTTGAGTTTGACGAGTGCGAAGCAGCGGTGATGCTGGTGTCCCTGGGCAGTTCT
A_73_P437986	0.0365433	0.00551149	up	1.50121	1.50121	0.586128		PREDICTED: Bos taurus chemokine (C-X-C motif) ligand 12 (CXCL12), transcript variant X3, mRNA [XM_005226617]	CCACAAAATGTGAAAATGGTCCCGGAGAAGGCAGCTTCCTGTATGCAGTGTGCTTTTAAA
A_73_119821	0.0493396	0.00886262	up	1.50115	1.50115	0.586066		LB0177.CR_I16 GC_BGC-17 Bos taurus cDNA clone IMAGE:8090298, mRNA sequence [DV820886]	TGTTTGAGAATTCAGAAGCCATCCTTTCTCTTTCCTGGTCCCAGCTTTCTCCTAGCTCTA
A_73_119093,A_73_P211197|282083	0.00887936	0.000510141	up	1.50113	1.50113	0.58605	SSTR2	Bos taurus somatostatin receptor 2 (SSTR2), mRNA [NM_174467]	TGTCCGACAACTTCAAGAAGAGCTTCCAGAACGTCCTCTGCTTGGTCAAGGTGAGCGGCA///CGTGGCTGTATGGGGTGTCTCTCTGCTGGTCATCTTGCCCATCATGATATATGCTGGCCT
A_73_114997|507139	0.00355854	8.94051e-05	up	1.50076	1.50076	0.585693	GCA	grancalcin [Source:HGNC Symbol;Acc:HGNC:15990] [ENSBTAT00000024550]	ATCAGTCCCTTGGCAAACACGCCTCAGTCTTTCTAAATGAAGAGTTAGTAAACCACATAC
A_73_P503513	0.0228381	0.0026143	up	1.50057	1.50057	0.585508		PREDICTED: Bos taurus ankyrin repeat domain 11 (ANKRD11), mRNA [XM_612059]	TGGTTCCACTTTTGATCGACTCAAGAGAATAAAACTAAGGCGTCTACCCCTCAGCAACAG
A_73_113841,A_73_P088716,A_73_103066,A_73_P147996|534129	0.0395261	0.00624576	up	1.50038	1.50038	0.585331	CREB5	Bos taurus cAMP responsive element binding protein 5 (CREB5), mRNA [NM_001319882]	TGTCACTTGGGGCGGGTGGGGTTGTTTGGAATTGTAAACAGCAAAGCATTTGTGTTTGTT///AATATGTTATCAGATCAAACTCCAACCCCAACGAGATTCCTGAAGAACTGCGAGGAGGTG///ATGGGAATATGAACACCATGGGCCACATGATGGAAATGATGGGCTCCCGGCAGGACCAGA///TATTAATAGAAGCTCCATTGATGTCCAAATAAAATCAGCAAGGATCTCGCCACTCCTCCT
A_73_P047886,A_73_P334206|504807	0.00119618	1.10529e-05	up	1.50024	1.50024	0.585192	COMMD5	Bos taurus COMM domain containing 5 (COMMD5), mRNA [NM_001014850]	TTCTCTAAGTGAAGTAGACAGCTGTGTCTTTCCCTGTTTTTGGAAGTAAAGCAACTGTAT///TTCAGAAAATTGCTGAAGCTGGTGGTCAGCAGTCTGCAGGGAGAAGACTGCCGGGAGGCT
A_73_P075517,A_73_117862|516000	0.0280469	0.00364211	up	1.5002	1.5002	0.585159	CNGA4	cyclic nucleotide gated channel alpha 4 [Source:HGNC Symbol;Acc:HGNC:2152] [ENSBTAT00000006887]///PREDICTED: Bos taurus cyclic nucleotide gated channel alpha 4 (CNGA4), mRNA [XM_594125]	TGTTATGGAGGAAAAGGGCCGTGAGATCCTGCTCAAAATGAACAAGTTGGATGTAAACGC///CTAGAGTGACCCCATGTCTATCCCCAGGACTCCCACCACCAAGTGAATCCAGACTTGTAG
A_73_111218|508443	0.00618334	0.000263567	up	1.50019	1.50019	0.585147	ABCG4	Bos taurus ATP binding cassette subfamily G member 4 (ABCG4), mRNA [NM_001105343]	CATTCAAACTCCTGTCCATGTCCTGCTACCTTCTTCCTATCAGCCAAGGTGGGCCCTGGG
A_73_P334111,A_73_108975,A_73_P043446|533357	0.0145135	0.00126127	down	1.50043	-1.50043	-0.585379	NAGA	Bos taurus alpha-N-acetylgalactosaminidase (NAGA), mRNA [NM_001046349]///alpha-N-acetylgalactosaminidase [Source:HGNC Symbol;Acc:HGNC:7631] [ENSBTAT00000012508]	TAACGTTTCTTAGCTTCCAAATCCCGACATACAGAGGCTGGTAAAAGCAGAGCAGATCTG///TTGCAGGCTGACACGGCCTGGGAGTGACCTTGGTTCCTTCGGGTCACCAATAAAGCTGTT///AACATGGACATCCTGCAGAATCCACTCATGATCAAAATCAACCAGGATCCCTTAGGCATC
A_73_109574	0.0490148	0.00876802	down	1.5019	-1.5019	-0.586791			TCTTGTTTGATGCAGGGTTGCCACAAACCTTTGATTTGTAAAACACAGTATCTGCAAAGT
A_73_P131536	0.0346825	0.00508121	down	1.50213	-1.50213	-0.587006		Rep: Chromosome segregation ATPases-like protein - Victivallis vadensis ATCC BAA-548, partial (6%) [TC426951]	GTTTCCCAAAACTTGATAAAAGATAGGGAGATCCTGAGTTCTTGAAGCCAAGGGTTTAAA
A_73_P110416	0.0349495	0.00515006	down	1.50395	-1.50395	-0.588757		pleckstrin homology and RhoGEF domain containing G7 [Source:HGNC Symbol;Acc:HGNC:33829] [ENSBTAT00000001083]	CAGGCCCAAACAGAAAACATCAAGAGAACATGGATAGCACAAATAACAGCAGCAATCTCT
A_73_101975	0.0047192	0.000162234	down	1.50468	-1.50468	-0.589454		Rep: Probable glutathione S-transferase - Bordetella petrii, partial (8%) [TC400313]	TTGCACTGTCATTTTGCTGCTTCAAGTCAGGTACTTAAACCCAAGAAAAAACTATTTAGG
A_73_P351371,A_73_114181,A_73_P279666|523865	0.0438886	0.0073818	down	1.50659	-1.50659	-0.591283	MZF1	Bos taurus myeloid zinc finger 1 (MZF1), mRNA [NM_001206304]	ATCCCTAGAAGATGAGGGGCCCGTCACGGTGAAGCTGGAGGACTCTGAGGAGGACGAACC///CCGAGTGCGGGGAGCGCTTCGGCCGCCGAACGGTGCTGCTGCAGCACCGGCGCGTGCACA///TTTACACTCCAGATGGACAACGTCTCTGTGGACCCTGACATCATGAGTCCCCACGTCCAC
A_73_P419951,A_73_P097076|507857	0.0142621	0.00122459	down	1.50907	-1.50907	-0.593661	ICOSLG	PREDICTED: Bos taurus inducible T-cell co-stimulator ligand, transcript variant 1 (ICOSLG), mRNA [XM_584543]	ATTTAAACGACCTTTACGTTTACTGGCAAATCAGCATGGCGGGCAAAGGGAATGTCGACT///AATTAAAAAAGATTTTGGAAGTTGCGGTCACGCTGCACGTGGCAGCAAACTACAGCATGC
A_73_102711|507031	0.00371577	9.73279e-05	down	1.5092	-1.5092	-0.593779	STX7	Bos taurus syntaxin 7 (STX7), mRNA [NM_001077864]	TTTGATAGTGAAGGCAATGTTTTACATGGCAAGCTATGAGACTTCAGATGGGAACAAATA
A_73_107368,A_73_P034431,A_73_P069531,A_73_P069536|511269	0.00947871	0.000576178	down	1.51208	-1.51208	-0.596537	AK7	Bos taurus adenylate kinase 7 (AK7), mRNA [NM_001104972]///Rep: AK7 protein - Bos taurus (Bovine), complete [TC406047]///adenylate kinase 7 [Source:HGNC Symbol;Acc:HGNC:20091] [ENSBTAT00000057239]	ATCATAAAAAGCCCTATGGTAATGAGTCACTACTTCATTAAAACCTTGCATGCTAACTTG///TACACTGGCTTTTCAGTTTGTTAGTGGCTGTGCAAAAGCTTTTAAATTTAATTAGGTCCC///TCAGATGACGAAAATACTGGAGCTTCCGGTTCAGCATCAATCCTTCCAACGAGAATTTAG///ACACTTATGCAGGGTCTGAATGAGTGTTGTAAGGTCAGACCTGATGATCCTGTTGATTTT
A_73_101188,A_73_P082291|537010	0.0164924	0.00156107	down	1.5133	-1.5133	-0.597698	STRN	Bos taurus striatin (STRN), mRNA [NM_001206104]	TTTTAATGGTCCAAAGGGTATGGTTAACCTCAGGCAGCTGTCTTTGCAGAATTACTAAAT///AAATGCTATATAGCCAGTGCTGGGGCGGATGCACTGGCTAAAGTCTTTGTATGACACAAT
A_73_P090626,A_73_115314|520771	0.00395039	0.000111279	down	1.51396	-1.51396	-0.598324	AVIL	Bos taurus advillin (AVIL), mRNA [NM_001192529]	GGAGAGATAGTAGAGCCTGCCAATCACAGCATGTACTCCATTTTTCTCATCCCTGCATTT///AAGTGCTTAATTCTGGGGCAAGGGCCTAAGTTTGTTTTAAATTTTAAGGTTGGTATTTTC
A_73_P032796|338038	0.0205626	0.00220151	down	1.51487	-1.51487	-0.599194	ATP6V0A2	Bos taurus ATPase H+ transporting V0 subunit a2 (ATP6V0A2), mRNA [NM_176637]	ACCAACAATTTCAGGGCACTGTTAACTGACTAGTAAACAGGAAACCTACAGGATCTGCCA
A_73_P347236,A_73_105908,A_73_P033431,A_73_P264131|282040	0.0135494	0.00111438	down	1.51546	-1.51546	-0.599754	RNPEP	Bos taurus arginyl aminopeptidase (RNPEP), mRNA [NM_001097563]	AGGTGCGGATCACCTACCGCGTCGGCGAGGGACCCGGGGTGTGCTGGCTGGCTCCGGAGC///GCTGATTCTTGAAATACTGTGCCAAGGGCTAATTTCTGGAGATTCTTTTTTCAGGTTTAA///ATCTCAAACGCCCAGAATGCAGAGCTGCGGCTGCGATGGGGCCAGATTGTCCTCAAGAAT///AGCTGAAGAAACAGAGGGTGGATTCCATCCCGGGACTGGAGTTTGATCGCTGGCTGGACA
A_73_P062244,A_73_P108450,A_73_P355281,A_73_113565,A_73_P256531|280678	0.0351753	0.00519572	down	1.51606	-1.51606	-0.600328	C4A	Bos taurus complement component 4A (C4A), mRNA [NM_001166485]	AGTACTTGCTGGACTCGAACAGCTGGATTGAGGAGATGCCCTCTGAGCGCATGTGCCAGA///TGTTATCCACAGGGAAATGCAGGGAGGCTTAGTGGGAAGCGATGAGACTGTGGCGCTCAC///TACAACCCTGAGCACAAGTGTTCTTGTGTTTTATGGGGCACCACGTAAGAGCAAACTCTT///GACTCCTGCTGTGCCGGGTACCCTGAACAGAGCCCTAGGCAAAACCAGGGACTCAATAAA///AGTTGTTTTCTGGATCGACTTCTAAAAACCGGGACTTTGAACAGAACACAGATGGGAGCG
A_73_P088326	0.0359326	0.00537411	down	1.51632	-1.51632	-0.600573		Rep: MGC142644 protein. - Bos Taurus, partial (14%) [TC416602]	ATGCAAAAATACAAACAGAAACTTCAAACTACTCAAGCGCCTTCTTTACAGAAAAGGTGA
A_73_105098,A_73_P111561,A_73_P110546|509072	0.0333042	0.0047945	down	1.5176	-1.5176	-0.60179	CARF	Bos taurus calcium responsive transcription factor (CARF), mRNA [NM_001032294]	GAAGATACAGAGACTCTGGAAGGAAATGTACATCGTATACTATGGGAAATGTGCAGACCA///CAGCAGTTGAATTTCAAGAAATCTGCTTTCTTAGAACAAGAAATCTCTTCCACTCTCAAA///GACCTCAGATGGTGATTCACTTGAATTTGAATTACAGCAATTGAATTTCAAGAAATCTGC
A_73_P070041,A_73_106721|510014	0.0253419	0.00311573	down	1.51895	-1.51895	-0.603071	LMBRD2	Bos taurus LMBR1 domain containing 2 (LMBRD2), mRNA [NM_001192240]	GAACTCAAGTACAATGGCAGATTCTTTTGGAACAAGCATTTTATCTAGAAGATGTAGCAA///AAGGTATCAGCCTGGTGGACGATACCTCTCAATGTCTCGCAGCAGAATATTTGATGATGT
A_73_105286,A_73_P252826|505537	0.0155054	0.00141018	down	1.51942	-1.51942	-0.603525	RRM1	Bos taurus ribonucleotide reductase catalytic subunit M1 (RRM1), mRNA [NM_001113296]	TGTGAGAAGTGCTGATGGGGCCTTTATTGGGTGTGGTCTAAATAGGTCATTCTGAAATAA///GTGCATAGAAACAAAATGAGTCATAACCTGTGAGAAGTGCTGATGGGGCCTTTATTGGGT
A_73_P154532,A_73_P051551|539770	0.00839592	0.000462848	down	1.51945	-1.51945	-0.603546	DCP2	decapping mRNA 2 [Source:HGNC Symbol;Acc:HGNC:24452] [ENSBTAT00000065963]///Bos taurus decapping mRNA 2 (DCP2), mRNA [NM_001078023]	ACCCGAAAACCAGAAGAGAAATCCGGAATATTGAGTGGTTCTCCATTGAGAAATTGCCTT///ATTATTTTGAGACATTAGTTGGCCATTTTGGTTAGCCTCTGAATAAATCAGATTCCTTGC
A_73_110998|506083	0.000562476	1.99886e-06	down	1.52002	-1.52002	-0.604091	RPS6KB2	Bos taurus ribosomal protein S6 kinase B2 (RPS6KB2), mRNA [NM_001205582]	GGGCACCCACCTGGCCTCCTGCAGTTGAGCCATGCCCTTGGAGAATTAAAAGGATCGAAT
A_73_P087596,A_73_P420796,A_73_117302|504782	0.00638613	0.000280536	down	1.52084	-1.52084	-0.604869	TXK	Bos taurus TXK tyrosine kinase (TXK), mRNA [NM_001206148]	AGCAGAAGCCCCTTTACATTGTGACAGAGTTTATGGAACATGGCTGCCTGCTTAACTATC///TCCAAGCAACTATGTGACCGAAAACAAACCAACTAATTTAGAAATATATGAGTGGTACCA///AAATGCACCTTTACAAGCCACATGAGTGGGCATTCTGGAACTGTCCTTCATAATCTTCCT
A_73_P287651,A_73_P291621,A_73_P323551,A_73_100493|614253	0.0497826	0.00898741	down	1.52088	-1.52088	-0.604905	IRF6	Bos taurus interferon regulatory factor 6 (IRF6), mRNA [NM_001076934]	CTTCTTTCTAACAGCATTAGTAGTCTCTGACTCTCCAAGTATGTCTAGCTTTTAAAGTTG///CTCATTGCCCACCAGAAAGGACAGATAGAGAAGCAGCCACCATTTGAAATCTACTTATGC///TCTGCTCCTTGGGATGAGAAAGACAATGATGTGGATGAAGAAGATGAGGAAGATGAGCTG///TCATTCTATTTGTACAAGGCAAAACTGCCTAGAACAGAACCCTTCTGCCTTGTTCTTGCG
A_73_101498|509896	0.00123443	1.23262e-05	down	1.52166	-1.52166	-0.605646	ABHD4	Bos taurus abhydrolase domain containing 4 (ABHD4), mRNA [NM_001034368]	AATAGTATTAACTCCTGGTGCTTTGTACTACTGGTCCAGCTGCCTTGGGCTCCTTTTCTA
A_73_P289536,A_73_101240|521829	0.0333977	0.00481647	down	1.52263	-1.52263	-0.606566	YIPF5	Bos taurus Yip1 domain family member 5 (YIPF5), mRNA [NM_001034543]	GTTTTTTGAACTGAATTTATCTGGGATGTGGACATCATTGGGCCAAATAACAAAAAGGAC///TGTCACGATTTCAGTATTGCAGTTCCCAGTGTAAAGTGCGTTTGATGCTTATTGATTAAA
A_73_114025,A_73_P429001|529184	0.0243178	0.00291468	down	1.52396	-1.52396	-0.607823	RPAP2	Bos taurus RNA polymerase II associated protein 2 (RPAP2), mRNA [NM_001103266]	CAAGCTGTACTTTTTCTGGATGATACCAGTTGTATTATCAGTTGACTAGAAAATTGAGAG///CAGTAGTAGATGTCATTGAGCAGTTAGGCAATTGCAGATTAGATAATCAGGAGAAAGCTA
A_73_105833,A_73_P277171,A_73_P102886|414732	0.0426629	0.00703039	down	1.52423	-1.52423	-0.608076	GATM	Bos taurus glycine amidinotransferase (GATM), mRNA [NM_001045878]	ATAATTTTAATGTTGGACACTGTACATGTATTTTTATTCTAATAAACTTTTGTGTTACAG///ACTGAGTTTGAGCCATGCTTTGATGCTGCTGATTTCATTCGAGCTGGAAGAGATATCTTC///TTGAAAAGCTGGGTATCAGTACCATTAAGGTTAGCATTCGTAACGCCAATTCCCTGGGAG
A_73_P067751|531942	0.0424995	0.00699399	down	1.52518	-1.52518	-0.608977	BCL3	Bos taurus B-cell CLL/lymphoma 3 (BCL3), mRNA [NM_001205993]	AAGAAGCGGTGCTGCTCTTGTTGGAGCACGGCGCTGACATTGACGCGGTGGACATTAAGA
A_73_100733|3283885	0.00254544	4.47081e-05	down	1.52644	-1.52644	-0.610168	ND4L	NADH-ubiquinone oxidoreductase chain 4L [Source:UniProtKB/Swiss-Prot;Acc:P03902] [ENSBTAT00000060543]	GCAGCCCTAGGTCTATCTCTACTAGTAATAGTATCAAATACATATGGTACTGATTATGTA
A_73_105102|3283888	0.000306496	2.89712e-07	down	1.5279	-1.5279	-0.611545	ND6	NADH-ubiquinone oxidoreductase chain 6 [Source:UniProtKB/Swiss-Prot;Acc:P03924] [ENSBTAT00000060562]	GGCTTTATACAGTTATGGTACCTGATTAGTTATTGTAACTGGGTGGTCTTTATTAATTGG
A_73_P304931,A_73_P114896|519689	0.0109603	0.000771386	down	1.52973	-1.52973	-0.613275	SEC16A	SEC16 homolog A, endoplasmic reticulum export factor [Source:HGNC Symbol;Acc:HGNC:29006] [ENSBTAT00000042743]	AAGCTTACCTGCCAGACGACAAGAACAAATCGATCGTCTGGGATGAAAAGAAGAACCGAT///TGGAGCGTTCCAGCATCAATTCCACGCCTTCACGGTGCTGGATGAAGAGTGGCTCTCTGA
A_73_105872,A_73_P049986|538090	0.0486171	0.00865604	down	1.53013	-1.53013	-0.61365	CCT6B	Bos taurus chaperonin containing TCP1 subunit 6B (CCT6B), mRNA [NM_001034642]	AATCAACTCTTCTAGAAGCTGAGACTTAACACATCTTACATCCAATTCCCATTATGGAGC///TAAAAGTTCAGGCTGAGCATTCAAATTCAAAACAACCTGTTGGCATAGATCTGAACACAG
A_73_P114506|522866	0.0109603	0.000771683	down	1.53123	-1.53123	-0.614687	PLA2G4F	Bos taurus phospholipase A2 group IVF (PLA2G4F), mRNA [NM_001192569]	CTGAGTGCAGGTTACTGCCCTGAACTGACACCAGAAGCAAAGATGTGTCCATCCAATCCA
A_73_105412,A_73_P494518|508327	0.0127388	0.00100002	down	1.53163	-1.53163	-0.615067	ATP6V1C2	Bos taurus ATPase H+ transporting V1 subunit C2 (ATP6V1C2), mRNA [NM_001083653]	AACTACTGCAGACACTTCTTTCCTCTAGCCCGAGAACAATTTAAGTATCCTACAGATTTT///TGAACTACTACAGACACTTCTTTCCTCTAGTCCGAGAACAATTTAAGTTTCCTACAGATT
A_73_P050066|508592	0.0306899	0.00418573	down	1.53176	-1.53176	-0.615195	CCDC153	Bos taurus coiled-coil domain containing 153 (CCDC153), mRNA [NM_001075365]	GTCTCTAGTCTCTGGGGCCCTCTGAGGCCCCAGCAATAAAGCTGTCTTGATGTAGACCTC
A_73_P165547	0.0170066	0.00164541	down	1.53223	-1.53223	-0.61563		high density lipoprotein binding protein [Source:HGNC Symbol;Acc:HGNC:4857] [ENSBTAT00000005656]	TAAAAAGATTCGGGAAGAAAGCAACACCAAAATCGACCTTCCAGCAGAGAACAGCAACTC
A_73_P289321,A_73_108345|511682	0.0178292	0.00175978	down	1.53305	-1.53305	-0.616402	MBTPS1	Bos taurus membrane bound transcription factor peptidase, site 1 (MBTPS1), mRNA [NM_001025330]	ATGGCATCGTGATAACACAGACATTTAAGGACCAAGGACTGGAGGTCTTGAAGCAGGAAA///TCAACTGCCATCATGTTTTGTAATTTGGGTCTTGATTTCACCATTGTCGGTGAAGAAAAT
A_73_P257636	0.0224289	0.00255205	down	1.53378	-1.53378	-0.617094		Rep: Taste receptor type 2 - Bos taurus (Bovine), partial (26%) [TC401036]	AAACCTCACAAATGCACTGAATATGACAAAGCCTTCATCAGGAGCTCACATCTTCTTTAA
A_73_P254741	0.00324691	7.42611e-05	down	1.53398	-1.53398	-0.617284		LB02535.CR_D03 GC_BGC-25 Bos taurus cDNA clone IMAGE:8612885, mRNA sequence [EE340941]	CCAAGAGACCAAACACTTGCAAGCATCATATTTGAGCACTTTTGTAAAAAAGAGGAAAAA
A_73_P032591|518407	0.0133176	0.00107578	down	1.53508	-1.53508	-0.618314	NAPA	Bos taurus NSF attachment protein alpha (NAPA), mRNA [NM_001192487]	CTGATGAAAAAGCTGTTAGAAGCCCACGAGGAGCAGAACGTGGACAGCTACACCGAGGCG
A_73_P064886,A_73_P120746|510175	0.0116388	0.000851485	down	1.53509	-1.53509	-0.618327	PROCA1	Bos taurus protein interacting with cyclin A1 (PROCA1), mRNA [NM_001166568]	ACTTTATCCTCTGAAGGTGAATTCAAGAACACCGACAGGTGCTGCTGGAAACACAAGTGT///ATGAAGAAGAAAAGCCCAGTTAAATCGGAATCACCTCCGGACTTAAGCCGATCGTTAAGC
A_73_P066656,A_73_109898,A_73_P371541|281453	0.0108446	0.000750305	down	1.53647	-1.53647	-0.619623	RGS9	Bos taurus regulator of G-protein signaling 9 (RGS9), mRNA [NM_174170]	ACTTAAAATCCCCAATCTATAAGGAGATGCTGGCCAAAGCGATTGAACCCCAGGGAACTA///TCAGTGAATTCCAGGAGGATACCCAGCCTGGGGCATCAGTTTTACTTGAAGATTTGGAAT///ATCTCTGGACTGGAGGCCCAGAACTTGGGCAACTTCATTGTCAAGTATGGCTACATTTAT
A_73_P206497,A_73_P418721,A_73_114352|505054	0.0222478	0.00251523	down	1.53696	-1.53696	-0.62008	SCPEP1	Bos taurus serine carboxypeptidase 1 (SCPEP1), mRNA [NM_001045909]	TTGGAAACTTTGAGGAAATCGGGCCGCTTGATAGGAATCTCCAGCCACCAAACACCACTT///TCTCAGAGTCTTATGGAGGAAAGATGGCTTGCTGGCATCGCTCTAGAACTTTATAAGGCT///TGTGTTATGTCATGGTCCATTTTGTTCACACATCAGTATGTCCTGAACACCTTTTCGTGT
A_73_112316	0.0161937	0.00151611	down	1.53707	-1.53707	-0.620181		1161735 MARC 7BOV Bos taurus cDNA 5', mRNA sequence [DN280608]	GGGAGTTGCATAAAGAGATCTAACTTAAGAGCATATTTAAGAGCAGATGCAGAATTTAAG
A_73_P056711	0.0291091	0.00386677	down	1.53777	-1.53777	-0.620837		NMDA receptor synaptonuclear signaling and neuronal migration factor [Source:HGNC Symbol;Acc:HGNC:29843] [ENSBTAT00000016087]	AAGAAGCTGAATATCTACCACAAGGGGGCCAAAATCTGGAAGATGCTGATTTTCTGCCAG
A_73_P269316,A_73_P214662,A_73_102835|509723	0.0284532	0.00373075	down	1.53842	-1.53842	-0.621445	ACTRT3	Bos taurus actin related protein T3 (ACTRT3), mRNA [NM_001038673]	AGCAGCATAATGAAATGTGATGCAGATCTGAGGAATGCTTTTTTCTCCAATATTATCCTT///ATCGGCAACGGGTCACTGAGGTGTTTTTTGAATATCTGGAGGTTCCTGCCTTCTTTATGT///TAATGGAGAAGCAGTCAAATAACAGATGCTTACTGAGTTGAACCAAATTAAATGCTCATG
A_73_115497|3283887	0.000683353	2.84404e-06	down	1.53928	-1.53928	-0.622252	ND5	NADH dehydrogenase subunit 5 (mitochondrion) [Source:RefSeq peptide;Acc:YP_209215] [ENSBTAT00000060577]	CCTGGTCACAAACCAAAAAGGCCTGATCAAACTATATTTCCTCTCCTTCTTAATCACAAT
A_73_P358751,A_73_P476248,A_73_101318,A_73_P431151|282218	0.0381529	0.00589848	down	1.5397	-1.5397	-0.622652	DNASE2	Bos taurus deoxyribonuclease 2, lysosomal (DNASE2), mRNA [NM_001075127]	TAAATCCAGCGAGTCTAAGGACTCTTCCAGTCGTGGGCACACCAAGGGTGTGCTGCTCCT///TCTCACCCAGTTCCTGGATATCAGCAAACAGCTGACCTATACCTATCCACTGGTATATGA///ATCTCTGACTCATCTGTACAATGGGAATCATAACACCTTACTTAGAATTGCTGAGTAATA///GACTCATCTGTACAATGGGAATCATAACCCCTTACTTAGAATTGCTGAGTAATAAAAAGA
A_73_102442	0.0223323	0.00253082	down	1.54	-1.54	-0.622927		PREDICTED: Bos taurus wingless-type MMTV integration site family, member 10B, transcript variant 1 (WNT10B), mRNA [XM_586498]	CAGCAGGAGGGGTGGGAAAGGCTAATTTATTGTACTGAGACTTGTTCTTGGTTCTTGTTT
A_73_115242	0.0237163	0.00280539	down	1.54066	-1.54066	-0.623553		Rep: Trophoblast glycoprotein precursor - Homo sapiens (Human), partial (84%) [TC416245]	ATAGTCCACAGGAGCCCCTGCATCCGAGAGCATGCTTACATTTTACTGTTCTGCATATTT
A_73_P249371,A_73_P052036|538911	0.00473712	0.000163873	down	1.54104	-1.54104	-0.623907	HIST3H2A	Bos taurus histone cluster 3, H2a (HIST3H2A), mRNA [NM_001098097]	TTATTACCGGTGACAAGCTACTTTTGACTCCGGGAAGTCATTAGTGTGACATTCAGACGC///GCACTTACTTCATGGGGTTAAGGGATTAAATGAGTAAATCCATAGTAATCTCCATGTTTA
A_73_117740	0.0190927	0.00195426	down	1.54207	-1.54207	-0.624867		Rep: HSPA14 protein - Homo sapiens (Human), partial (11%) [TC443622]	CTTTAGGTTTGGTTTGTCATTTGGAGATCATGGAAACAATTTGGATTATATAAGCTTCCC
A_73_P064826|100848380	0.0307243	0.0041916	down	1.54219	-1.54219	-0.624977	RAB11FIP4	RAB11 family interacting protein 4 [Source:HGNC Symbol;Acc:HGNC:30267] [ENSBTAT00000022573]	ATGATGACTTGAATGGACAAATCTTGAGCCTCAGCCTCTACGAAGCCAAGAACCTCTTTG
A_73_115840,A_73_P418006|505687	0.00921558	0.000542942	down	1.54304	-1.54304	-0.625778	PLS3	Bos taurus plastin 3 (PLS3), mRNA [NM_001045923]	ACTTTTGAGGAGAGAGTGGGCTCAGAATTTAGGAAGGATATGATAGGCCAAGTATGCTAA///GACTAAGTTAATCATGGGAGCCCTCAGGTGAAAGAGTTTTAGTAACAACAACTCCTCTTT
A_73_P395216	0.0234496	0.00274967	down	1.54393	-1.54393	-0.626611		ubiquitin specific peptidase 32 [Source:HGNC Symbol;Acc:HGNC:19143] [ENSBTAT00000026766]	ATTGATTGTGGGGAAGACAGGGCTTTCATTGGAAATGCCTATATTGCTGTGGATTGGGAC
A_73_105427	0.00235423	3.84168e-05	down	1.54549	-1.54549	-0.628065		1372626 MARC 7BOV Bos taurus cDNA 5', mRNA sequence [DN536521]	AAAGGAGCCTGAAATACTCTGGCCCCTTAACAGAAAAAACCTGCTGACCCCACAGTAAAT
A_73_P222542,A_73_P068066|617892	0.0080182	0.000422188	down	1.54738	-1.54738	-0.629825	FAM71E1	Bos taurus family with sequence similarity 71 member E1 (FAM71E1), mRNA [NM_001205375]	AACTTCGTGCAGGTGACCCGGTTAGGAGAAGTTGCCAACAAGGTCACCATGGGAGTGGCA///AGTGTCCCCTACCTTGGGGCCAGACAGATGAATTAATATTAAAGTTACTAAAGATCGGCC
A_73_P091076	0.021931	0.00243802	down	1.54805	-1.54805	-0.630451		Rep: Synembryn-B (Brain synembrin) (hSyn) (Protein Ric-8B). - Bos Taurus, partial (18%) [TC442732]	ATGGAACTGAAGGACTTCACTCTATAAAGCAGCCCTGGTTGAATCTGGCAGTTCTGTTTG
A_73_102949|616621	0.0107269	0.000729053	down	1.54826	-1.54826	-0.630646	PNKP	polynucleotide kinase 3'-phosphatase [Source:HGNC Symbol;Acc:HGNC:9154] [ENSBTAT00000002397]	TGAAGCAGAGGAAACCGGTCGTGATCGACAACACAAACCCCGACGTCCAGAGCCGGGCCA
A_73_P054546,A_73_112682,A_73_P167497|530023	0.0024201	4.12013e-05	down	1.55207	-1.55207	-0.634198	CABIN1	calcineurin binding protein 1 [Source:HGNC Symbol;Acc:HGNC:24187] [ENSBTAT00000018360]	AGCACATGCCGGCACAGGGGCTCTTCTGCGAGAGGAACAAGACCAATTTCTTCAACGGTG///CCGCCCAGGCAGCGCGTCCACGCTCCGCGGGCTCTGCCTGGGTCAGCGGTGGAGGATCCG///ATCTCCCAAGCAGGACTGCCTGGTAAAGACCTTCCGGCGACCACAGAGGAGAAAGGGAAA
A_73_P035236|518494	0.0131539	0.00105097	down	1.55285	-1.55285	-0.634922	GPS2	Bos taurus G protein pathway suppressor 2 (GPS2), mRNA [NM_001075774]	TTTTACATGAGGAAGAAAAACGGAGGCGAAAAGAGCAGAGTGACCTGACCACTCTGACAT
A_73_P275896,A_73_P049526|514391	0.0127235	0.00099495	down	1.55392	-1.55392	-0.63591	ZFAND4	zinc finger AN1-type containing 4 [Source:HGNC Symbol;Acc:HGNC:23504] [ENSBTAT00000031538]///zinc finger AN1-type containing 4 [Source:HGNC Symbol;Acc:HGNC:23504] [ENSBTAT00000008834]	TAACACCGTTGTCTGAATCTTTAAGCCTAAGAAAGCTGTCAAGGTAAAACCTCGTCCGCC///GAACCCAACTTTTCACCTTTTGAAAAGTGAGTATATTGAAAACAAAATCTCAGAGCTTGG
A_73_120321	0.0497963	0.00899527	down	1.55422	-1.55422	-0.636191		LB02945.CR_E03 GC_BGC-29 Bos taurus cDNA clone IMAGE:8469677, mRNA sequence [EE353059]	GTAGACTTGATCTTTGGATTGAAAGAAACAACACTTAGTCATGGACATAAATTTGGAGAG
A_73_P461781	0.00458293	0.00014909	down	1.55688	-1.55688	-0.638656		lysine acetyltransferase 2B [Source:HGNC Symbol;Acc:HGNC:8638] [ENSBTAT00000000994]	CTGTTTTAAAGATGGAGTTCGGCAGATCCCGATAGAAAGCATTCCTGGAATTCGAGAGAC
A_73_P047601,A_73_121253|282382	0.0476653	0.00837373	down	1.55747	-1.55747	-0.639205	TGFBR1	Bos taurus transforming growth factor beta receptor 1 (TGFBR1), mRNA [NM_174621]	TTTAGGTAACTGCTGTGCTGAAGATCATCTTTAAGGGTAAAGGAGCTGGATGGCTGAGTT///GATTTCTCCCTGGTTAGTACATTCTCAGAGGATTCTGAACCACTAAAGAGTCTCTGTGAT
A_73_P100441	0.0210519	0.00229167	down	1.56024	-1.56024	-0.641767		Rep: COG1782: Predicted metal-dependent RNase, consists of a metallo-beta-lactamase domain and an RNA-binding KH domain - Streptococcus pyogenes M49 591, partial (29%) [TC447127]	TCCCAGTACGAAAGGACAAGAGAAATAAGCAACTTTAAATCAAGCGCCTTAAGACAACCA
A_73_P453226,A_73_P474088,A_73_114872,A_73_P081451,A_73_P081446|509657	0.0105265	0.000701767	down	1.56082	-1.56082	-0.642301	PTPRK	Bos taurus protein tyrosine phosphatase, receptor type, K (PTPRK), mRNA [NM_001191537]	AAAGCATTCTAGTATCCTCTTTTTAGATTGCCAGTTCATGACATGGTGCTTATGAAGATT///AAACGGTCATTTTTGAAGCTGATCCTGCAGGTGGAAAAATGGCAGGAGGAATGTGAGGAA///GACTAAAGCATTCTAGTATCCTCTTTTTAGATTGCCAGTTCATGACATGGTGCTTATGAA///ATGGCATTTGGATCCAGATACCGAATATGAGATCCGTGTTCTGCTTACAAGACCAGGTGA///AATGTTGTTGACGTGTTCCATGCAGTCAAGACACTAAGGAACAGCAAGCCAAACATGGTG
A_73_P379376,A_73_116438|618405	0.0019721	2.92916e-05	down	1.56131	-1.56131	-0.64276	GADD45B	Bos taurus growth arrest and DNA damage inducible beta (GADD45B), mRNA [NM_001040604]	CCGCCGGGCATCGGAAACTTGCTGCGGAAAACACAAAACCACATAAATATTTGACCCCCC///TTACTTGCACTTGTTACTTGAACCACTGAAAGACAGAGGGGAAGCTTACAGATACATATA
A_73_103314	0.0430078	0.00711202	down	1.56166	-1.56166	-0.643084		coiled-coil domain containing 159 [Source:HGNC Symbol;Acc:HGNC:26996] [ENSBTAT00000045790]	TTCCCACCTGCCTGAGCAGCCGGGACTGCTCTCCCTTGAAGACTCCTCCAGAAAGAAAAT
A_73_P031846,A_73_P413096|504991	0.0131117	0.00104483	down	1.56293	-1.56293	-0.644253	ANKRD22	Bos taurus ankyrin repeat domain 22 (ANKRD22), mRNA [NM_001081579]	GCATCTCGAGATGTTTTGCTATCAGTTTACAAATTAGAGCCATCTTGATTTCAAACATGA///TATGGCTGCACTGCACTACACTATGCCTGTGAAATGAAAAACCAAACGCTCATTCCTCTG
A_73_P495273	0.00853987	0.000476394	down	1.56473	-1.56473	-0.645914			AGAACCGCCGGGCCAAAGCCAAGCGACTGCAGGAGGCCGAGCTGGAGAAGCTGAAATTGA
A_73_104447|504974	0.0490114	0.00876554	down	1.56528	-1.56528	-0.646422	OSCP1	Bos taurus organic solute carrier partner 1 (OSCP1), mRNA [NM_001045904]	ACCAGTCAAGGCAGAGCTCCAGCAAGGGCGACGACTGGCTCGCCATGATGGATGAATTAT
A_73_116635	0.0415285	0.00672984	down	1.56573	-1.56573	-0.646833		Rep: Regulator of G-protein signaling 10 - Bos taurus (Bovine), complete [TC405235]	GTCTCACACACAAAAATGAAATAGTCCTTATACACTGGACATCTTGAGTATTTTACAGCT
A_73_111391|281249	0.0377424	0.00579201	down	1.56581	-1.56581	-0.646907	IL18	Bos taurus interleukin 18 (IL18), mRNA [NM_174091]	TCAAAGAAGTGTTCCAGGACATGATGATAAGATACAATTTGAGTCTTCATTGTACAAAGG
A_73_109947	0.0118732	0.000887658	down	1.56703	-1.56703	-0.648029		GB	CACATTAGATTGCCTTGCCAAACGTTCTCGAGCCCCAGAAAGGATAAATAACCCAACTCA
A_73_P056126	0.00419338	0.000124653	down	1.56775	-1.56775	-0.648699		Rep: Zinc finger protein 91 - Homo sapiens (Human), partial (13%) [TC455125]	TTTAGTCAGAGTGCTCATCTCAGTAAACATCAGAGAACACACACTGGAGAGAAACTCTAA
A_73_P147896	0.0366468	0.0055341	down	1.569	-1.569	-0.649847		CR553315 Normalized and Subtracted bovine embryonic and extraembryonic tissues (bcaz [CR553315]	TTGGAAGAAGAAACTTTCTCTTGTAGTGCCTCTTGACAAAGCACAATTTCCTGCCCCACC
A_73_100279,A_73_P078326|512493	0.0221669	0.00250033	down	1.57059	-1.57059	-0.651311	NEXMIF	PREDICTED: Bos taurus KIAA2022 ortholog (KIAA2022), mRNA [XM_015461636]///KIAA2022 [Source:HGNC Symbol;Acc:HGNC:29433] [ENSBTAT00000000375]	TGTGGATAGCACCTGTAGATCACAGTGGAAAAATATGTTGTGTTACACAATTTACCAAAA///ACATTTTGGGTTTTACCTGTGTTTGAAGAAGAGACTCTCATTTTCCAGAAAGACATTTGA
A_73_P064386|497020	0.0227326	0.00259702	down	1.57084	-1.57084	-0.651539	ST8SIA5	Bos taurus ST8 alpha-N-acetyl-neuraminide alpha-2,8-sialyltransferase 5 (ST8SIA5), mRNA [NM_001192874]	AGACGTGGTCACCGTGAACCCCAGCATCATCACAGAGAGGTTCCACAAGCTGGAGAAGTG
A_73_P050696|522449	0.0460764	0.00793978	down	1.57104	-1.57104	-0.651721	LOC522449	Bos taurus uncharacterized LOC522449 (LOC522449), mRNA [NM_001098384]	GACCGGGTAGAAGCCATTTAACAAGCATTTAAAATAGATAGCTGCAACATCAATGATAAT
A_73_115030,A_73_109834|615376	0.0201347	0.00212034	down	1.57123	-1.57123	-0.651893	EPDR1	Bos taurus ependymin related 1 (EPDR1), mRNA [NM_001102288]	CTATTGCCAGGAGAAATGTGTGACACCTATGTTATGCTGAAAACAATCTGTACTCACAGT///CCGTCACCAAAAATTACAGTGTGATATTGTCCACACGGTTTTTCGATATACAGCTGGGCA
A_73_100518	0.0443898	0.00750338	down	1.57151	-1.57151	-0.652149		Rep: LOC524222 protein - Bos taurus (Bovine), partial (8%) [TC462302]	ACTAGCTCAGCAGAAATCTTTCCACTGGCTAAGTTGGGACCACAACTAAACGGCTTAACA
A_73_116072,A_73_P365821|534811	0.00678528	0.000312601	down	1.57168	-1.57168	-0.652311	ZWILCH	Bos taurus zwilch kinetochore protein (ZWILCH), mRNA [NM_001102179]	ACTATGAACAAATCCTCTTGATGAGCAGCACATTTTTCAGCTGCCAGTCAGACCAACTGC///TAAGGTGTGATGGTTCAAATCCTGAAGGTATCAGTTGGCTGGGAGCTGAGCTTATCTCAA
A_73_117229	0.0233113	0.00270852	down	1.57404	-1.57404	-0.654472		Rep: Glycosyl transferase, family 2 precursor - Burkholderia phytofirmans PsJN, partial (4%) [TC433919]	CACAGTTATCTAGAGCTGTGTCCATAAACCTAAATAAGCACAAACGACATGTATAGGTTT
A_73_P032026,A_73_115582,A_73_P338246|505422	0.0138292	0.00115217	down	1.57703	-1.57703	-0.657206	EHF	Bos taurus ETS homologous factor (EHF), mRNA [NM_001038036]///PREDICTED: Bos taurus ets homologous factor (EHF), transcript variant X1, mRNA [XM_005216370]	ACTCAGCCGAGCCATGAGATATTACTACAAAAGAGAAATTCTGGAACGTGTGGATGGACG///TTTTTGTTTGTTTGTTTGATGGGTCCCAGAAAACACTAATAAAAATTACAGAGACCAGCC///AAACTATTTATACGACACCAACTATGGTAGCACAGTAGATTTGCTGGACAGCAAAACTTT
A_73_114176|506977	0.0191587	0.00196697	down	1.57829	-1.57829	-0.658362	LGALS8	Bos taurus galectin 8 (LGALS8), mRNA [NM_001045954]	TGAGATGATAATTTACTGTGACGCCAGAGAATTCAAAGTCGCGGTGAATGGTGTCCACAG
A_73_P423851,A_73_P069871|538841	0.0138541	0.0011571	down	1.57834	-1.57834	-0.658404	ZSWIM6	zinc finger SWIM-type containing 6 [Source:HGNC Symbol;Acc:HGNC:29316] [ENSBTAT00000028278]	CAGATGAAATTCTTTCCCAGAATTCAGAAATCAACCAAGTACATGGTGCTCCTGATCCAA///CTGAAACAAATCTACAAAGGCAAAAAGAAACTGATGATGTTGGTTCGGGAGAGGTTTGGT
A_73_P099328	0.00573455	0.000232544	down	1.57862	-1.57862	-0.658665			TACCAACTCATGGAGATTGTTGTTATTCCTTAATGGTTAAATCTATTCTCTTGGGTTGGT
A_73_P044461|767995	0.0443567	0.0074961	down	1.57935	-1.57935	-0.659327	HEMGN	Bos taurus hemogen (HEMGN), mRNA [NM_001077055]	GAAATTCCAAACGTGCCTCAAGAAAGTAACCCAGAAAATGACATCTACAGTTATGTTTTA
A_73_P293816,A_73_102426|505648	0.0320844	0.00449633	down	1.58007	-1.58007	-0.659992	PGM3	Bos taurus phosphoglucomutase 3 (PGM3), mRNA [NM_001045922]	TCAACGATGGGACCAAAGGGAAACTCAATCATTTATGTGGGGCCGACTTTGTGAAAAGTC///CAGTGTACCTTACTGGATTGTTTCTAGGTCTGATTATTTTTCTTAAACACTACCAGAATC
A_73_106515	0.0108144	0.000741204	down	1.58031	-1.58031	-0.660206		Rep: Histone acetyltransferase MYST3 - Homo sapiens (Human), complete [TC399375]	AATTAAAAAGAGCCTTACTTTCTTTACACGCCACATGGACAGAACTTGTGTAAAAGTGAA
A_73_113430	0.0413413	0.00668035	down	1.58173	-1.58173	-0.661501		pleckstrin homology and RUN domain containing M1 [Source:HGNC Symbol;Acc:HGNC:29017] [ENSBTAT00000027135]	AAGAGTCCAGACCGTTCCGAGGAGCCCATGTCCTATGACTCAGACCTGGGGATGGCCAAT
A_73_P057001|541275	0.00896942	0.000520219	down	1.58215	-1.58215	-0.661886	ATP7A	Bos taurus ATPase copper transporting alpha (ATP7A), mRNA [NM_001192852]	ACTGTCTGATAAACGATCACTAAACAGCGTTGGTACCAGTGAACCTGACAAGCACTCACT
A_73_112472|281795	0.0435856	0.00730555	down	1.58265	-1.58265	-0.662341	GNAT2	Bos taurus G protein subunit alpha transducin 2 (GNAT2), mRNA [NM_174326]	ACAAACATAACTGAAGGCAGGCACATAAAAACTGTGTGGTGACACAAAGAAATCCTATGT
A_73_112594,A_73_P116041|317777	0.046756	0.00813627	down	1.5852	-1.5852	-0.664669	PLA2R1	Bos taurus phospholipase A2 receptor 1, 180kDa (PLA2R1), mRNA [NM_175051]	CCTGTTAAGAACCAAGAGCCATTTTAGAAACTGGAGGTACTGGGGTAAGCACTTAGTTTC///CATCTTGCAAGCTTTGCCCATATTGAGGAAGAGAATTTTGTGAATGAGCTTTTACATTCA
A_73_P037196,A_73_P447831,A_73_P185107|508266	0.0153951	0.00139247	down	1.58556	-1.58556	-0.664996	CHN1	Bos taurus chimerin 1 (CHN1), transcript variant 1, mRNA [NM_001075349]	CTGGTTTCTCTTAGTTCTTCTCTAACATAGTACTTTCTTTCCAGCAAAAGCAAAATGTGT///AACGATATACGATATCAGAGACTGGTGGTGGAGCTGCTTATCAAAAATGAAGACATTTTA///TTATCACTGGTGCACTGAAACTGTACTTCAGGGATTTGCCGATTCCACTCATCACATATG
A_73_P295081,A_73_102234|533929	0.0141704	0.00120924	down	1.58656	-1.58656	-0.665906	FGF18	Bos taurus fibroblast growth factor 18 (FGF18), mRNA [NM_001076007]	TTATTGTTGACTTGAAACCCGCTGACAAAAGACTCACGCCAAGGGACTGTTGTCAATGCA///CCAGAGGAGGACTTGAATGAGGAAAACGACACTCTGAGAAACCAAAGTCCTTTTTCCCAA
A_73_P370876,A_73_P067096|615457	0.00443925	0.000141195	down	1.58802	-1.58802	-0.667225	TK2	thymidine kinase 2, mitochondrial [Source:HGNC Symbol;Acc:HGNC:11831] [ENSBTAT00000006795]	TGAAAAAGAGAAAAAATCAGTGGTCTGTGTGGAGGGCAACATTGCCAGTGGGAAGACAAC///TTAGAACTCTTTGAACAAAACCGGCACCGAATCCTAACTCTGGAGAATCGGAAGCTTGGT
A_73_P058361|508417	0.0211829	0.00231056	down	1.58915	-1.58915	-0.668256	LYRM1	Bos taurus LYR motif containing 1 (LYRM1), mRNA [NM_001205637]	CAGGAGAAACTGAGGAAATTTTCCAAACCAATATATCTCAAATCTCATGATGAAGTTTCC
A_73_P287656,A_73_P084191,A_73_P291916,A_73_P452141|507881	0.0427938	0.00705877	down	1.58931	-1.58931	-0.668398	COL5A3	Bos taurus collagen, type V, alpha 3 (COL5A3), mRNA [NM_001205624]	TCATGGAATACTGAGTTCCAGATCTTTCCTGGTGCTGGGGAGAAAGGAGAAAAAGGAGAA///TTTGGCCAGACGAACCAGAAGTTTGGGTTTGAACTGGGCCCTGTCTGCTTTAGCAGCTGA///TATATTTAATCTGCTTCCTCCTTAGGGAAGGCTGGGATATGATGAGAGAAACCCCCATCC///CCTACAGGGAATGCCAGGCCCTGCTGGAGAAAAGGGAGAAGTTGGAGATGTAGGGTCCAT
A_73_P159387,A_73_P103721|788530	0.0118425	0.000880842	down	1.59119	-1.59119	-0.670108	TMEM262	Bos taurus transmembrane protein 262 (TMEM262), mRNA [NM_001242632]	GAGAAGGGGGAAGGAAAAGGCTGCTTCGGGTGTTTTAATAAAGTCTATCATTTATTTCCA///GGGGGAAGGAAAAGGCTGCTTCGGGTGTTTTAATAAAGTCTATCATTTATTTCCAAAAAA
A_73_P100221	0.0331427	0.00474552	down	1.59132	-1.59132	-0.670226			AGAGTCCATATCGACAATAGGGTTTACAGAACTCGATGTTCGGATCAGGACATCCTGATG
A_73_106905	0.0137183	0.00113759	down	1.59303	-1.59303	-0.671771		Rep: LOC90835 protein - Homo sapiens (Human), partial (77%) [TC471322]	ACTCCCTGTGTTTTCCCCAATAAAGGCCTGGGCCAAAGTGGCCCCACCACGCCGTAAAAA
A_73_106218|507989	0.0371031	0.00564252	down	1.59526	-1.59526	-0.673795	APLF	Bos taurus aprataxin and PNKP like factor (APLF), mRNA [NM_001077874]	ACTCTTCACAAATGAAACATTGAAATGTCACCCTTCAGTGTAGTGGATGAAATTTGTTGC
A_73_P083496|539229	0.0481917	0.00852877	down	1.59984	-1.59984	-0.677924	FAM69B	family with sequence similarity 69 member B [Source:HGNC Symbol;Acc:HGNC:28290] [ENSBTAT00000029233]	GTGCTCAGCCACCTCAAGACCCTGCTCTGGAAGGAGATCTCCAACACCAAGTACACCTGA
A_73_P030217,A_73_110384|281374	0.021851	0.00242372	down	1.60153	-1.60153	-0.679452	FURIN	Bos taurus furin, paired basic amino acid cleaving enzyme (FURIN), mRNA [NM_174136]///Rep: Furin precursor - Bos taurus (Bovine), complete [TC392722]	TTAGAGATTGAAAACACCAGTGAAGCCAACAACTATGGGACACTGACCAAGTTCACCCTC///CCCAGCATTGTTGGTTCTATTTAATGGACACGAGATAATGTTAGAGGTTTTAAAGTGATT
A_73_103204|615821	0.00922485	0.000545184	down	1.60627	-1.60627	-0.683719	LYRM2	Bos taurus LYR motif containing 2 (LYRM2), mRNA [NM_001113310]	ACACACCCGGTATTTTGAAAATGTTTTTGGATGTGTCAGCAGTATTTTGTAAGAAGCAAA
A_73_111342	0.00235423	3.82384e-05	down	1.60638	-1.60638	-0.683811		Rep: JmjC domain-containing protein 5 - Bos taurus (Bovine), complete [TC394598]	TCTCCAAAGAGGGTTTTAGGTCAGGAGAGACGGAGGCTTCAGACTTCACATAAACACATT
A_73_108317	0.0212235	0.00231846	down	1.60716	-1.60716	-0.684511		Rep: Kruppel-like factor 2 - Homo sapiens (Human), partial (25%) [TC428018]	GTAAATGAGACAAGTGGGCATTTTGACTACCTGGTAGAACATTTTTATAAGATTTTGCTG
A_73_P418376,A_73_P039346,A_73_P277121|540780	0.0335274	0.00484669	down	1.60734	-1.60734	-0.684675	CASC4	Bos taurus cancer susceptibility 4 (CASC4), mRNA [NM_001081737]	CAACCTTGAAATGAATTTTCAGTCAGTATTTCAAAGCTTCTCTGGTAGTTTTAGTGACCT///CCTGAATTCAGTGTTAATTTGATGGAAACTCTGCTTTTAAAATCATCACTTACTGGGTTC///TACCCCCTGTAACTCAGGTTCTAGTCAAAATTCAAACTTACAGAGGTTAAATAAAAAGGT
A_73_102789	0.0404835	0.00647056	down	1.60744	-1.60744	-0.684765		Rep: Cyclin-H (MO15-associated protein) (p37) (p34). - Canis familiaris, complete [TC406896]	AAAGACGTGTAGAGGTTTTATTTCATCATTGATCAGCTAAGTGACTCTAAGTCCTACAAA
A_73_113867	0.00606923	0.00025568	down	1.60763	-1.60763	-0.684936		Rep: Taste receptor type 2 - Bos taurus (Bovine), partial (21%) [TC432913]	CCACCTTTTCTGGGCATGCATTATTGTGATTTCTGTCCTCAGGGACCACGTTTCCATTTT
A_73_111648,A_73_P355291|511736	0.00118924	1.08525e-05	down	1.60767	-1.60767	-0.684971	RABEP2	Bos taurus rabaptin, RAB GTPase binding effector protein 2 (RABEP2), mRNA [NM_001083408]	GGGCCCGAGCCAGGCCCCAAGATGTGTGCATGGAGACAAGGCCAGATTTTTCTGTCATTT///TCCCTGTGCAGCTTGAGGATGGAGATGGAGCGCGTCCAGGAGGAACAGAGCAAGGCCAAG
A_73_P156067	0.0416784	0.00678249	down	1.61005	-1.61005	-0.687109		LB00498.CR_A13 GC_BGC-04 Bos taurus cDNA clone IMAGE:8064759, mRNA sequence [DT851036]	ATACCTCTCAGGAACAGCCGTTTGAGGCTTTATATGTACAATAAGTAAATCTATGCTATG
A_73_P114816	0.0338081	0.0049079	down	1.6137	-1.6137	-0.690369		GRB2 associated regulator of MAPK1 subtype 2 [Source:HGNC Symbol;Acc:HGNC:27172] [ENSBTAT00000020013]	ACCAAGCTGCAGGTCAAGAAGATCATGCAGTTCATCAAAGGCTGGCGGCCCAAGATCTGA
A_73_109412	0.0117501	0.000869479	down	1.61799	-1.61799	-0.694205		Rep: TatD DNase domain containing 3 isoform 1 - Canis familiaris, complete [TC396171]	GAAAATCTCAGGAGAGAAGAGAGTCTTGTACCTAGTGGTGATGGTAGCACAACAATATGA
A_73_P358541	0.00519448	0.000193975	down	1.61852	-1.61852	-0.694671		PREDICTED: Bos taurus myosin VA (heavy chain 12, myoxin) (MYO5A), mRNA [XM_615219]	GATTGTGCAAAAGCAAATTCTTAGCTTTCACTAGAAACTCTGGTTCGGAATTACAATCAT
A_73_121364|506181	0.0170783	0.00165461	down	1.6191	-1.6191	-0.695196	LOC506181	Rep: Uncharacterized protein ZNF77 - Homo sapiens (Human), partial (47%) [TC412104]	TGGAGCAGAACCTTGTGAATGGGACACTGTGGGAAAACCTTCAGGTCTTCACTTATTTCA
A_73_P380456,A_73_109763|614909	0.00564905	0.000225558	down	1.61933	-1.61933	-0.695395	IRF8	Bos taurus interferon regulatory factor 8 (IRF8), mRNA [NM_001083769]	TTTCTGAACCGTATAAAGTTTACCGCATCGTCCCCGAGGAGGAGCAGAAATGCAAATTAG///TTCAGATGATGAAAACTTCCCTCTTGGGCCCTTGTTGCCAGGAAGCTTAGAGCTGAATTT
A_73_P100287	0.0202716	0.00215294	down	1.6198	-1.6198	-0.695812			TAGACCCACAAGTCAACATCACTCTATCGCTCTATTGATCCAAAAACTTGATCAACGGAA
A_73_P206360	0.0489107	0.00873744	down	1.62089	-1.62089	-0.696789			TATTGAGAGTATTTAGCCTTGAGCTCACCCAAGAAAGTCACAGCTCGGTCTGTCCAAAAG
A_73_P177622	0.011597	0.000847416	down	1.62193	-1.62193	-0.697708		4106117 BARC 9BOV Bos taurus cDNA clone 9BOV32_O04 3', mRNA sequence [CK974945]	TCCAGAGAAAAGTGATATCAAGGGAAAATAAAGTCTTAACTGATGTTCTAAAACTGGCCA
A_73_113710	0.0115542	0.000840188	down	1.62442	-1.62442	-0.699922		Rep: Protein FAM46A (HBV X-transactivated gene 11 protein). - Canis familiaris, partial (53%) [TC412467]	ATATGTTTTGTGCAATGATGACCTGCTCCTGGTTTTAAACTTGGCAAAGCTTTGTGGATC
A_73_101809|516886	0.0161668	0.00151039	down	1.62453	-1.62453	-0.70002	TRIM62	Bos taurus tripartite motif containing 62 (TRIM62), mRNA [NM_001205835]	AAGTTTCCGGGCAAGCTCTGCTCCTACTTCAGCCCCGGGCAGAGCCACGCCAATGGCAAA
A_73_117791	0.0137616	0.00114443	down	1.62506	-1.62506	-0.700495		Rep: Peroxidasin homolog - Homo sapiens (Human), partial (96%) [TC403550]	AGCAGACCACGGGGCAGACGCGTGCCTGACTCCATGTTAAGGCTTCTCAGGGTTCTATTT
A_73_P071911	0.00719379	0.000353408	down	1.6253	-1.6253	-0.700704		chromosome 1 open reading frame 167 [Source:HGNC Symbol;Acc:HGNC:25262] [ENSBTAT00000012350]	AGGCCACAGAGAGCCCAGGCCAAGAACTCTGAAGGACAATAAAACACCCTTCTTAACCCC
A_73_112929,A_73_P445611|511762	0.00830631	0.000449727	down	1.62728	-1.62728	-0.702466	ABCA7	Bos taurus ATP-binding cassette, sub-family A (ABC1), member 7 (ABCA7), mRNA [NM_001205705]	GACCAAAGCAGGGCAGAGGGGCTGAAGCTTGACCCAGACTCCAGAGGCCCTGGAGGAAAT///ACGATAGTGCCAATGTCGCCATGCTACAGAGGCTCCTGCAGATCCAGGACAAGGGAAGGA
A_73_100462|100337295	0.0335844	0.0048639	down	1.62785	-1.62785	-0.702965	IL11	interleukin 11 [Source:HGNC Symbol;Acc:HGNC:5966] [ENSBTAT00000063946]	AGACCTGTTCTCCTACCTGAGGCATGTGCAGTGGCTGCGACGTTCAGGAGGCCCTTCCCT
A_73_P099431	0.0127388	0.00100068	down	1.63389	-1.63389	-0.708308			CCAACCGAAACTACCAACTCATGGAGATTGTTGTTATTCCTTAATGGTTAAATCTATTCT
A_73_121378	0.0131972	0.00105769	down	1.63503	-1.63503	-0.709313		Rep: DTD sulfate transporter - Bos taurus (Bovine), complete [TC393827]	TCAAGTGTGTAGCATCTTATACTGTGGAACTGGAAATTGCTGCACACAAGAAATTTTGAC
A_73_P070496|513251	0.0271715	0.00345894	down	1.63814	-1.63814	-0.712063	C17H4orf33	chromosome 4 open reading frame 33 [Source:HGNC Symbol;Acc:HGNC:27025] [ENSBTAT00000061299]	ACACACTGCTTGGAGAAAAGTGGAACCAACCAGAATCAGACCTGTGGCTAATAGAGAAAC
A_73_P299036	0.046756	0.00813373	down	1.6386	-1.6386	-0.712463		000707BINA001120HT BINA Bos taurus cDNA, mRNA sequence [DY090673]	AAGAAAAATACTTGAGGCCTTCTCCAAGATTCTTATTTCACCCACAAATGTCGGCTATTG
A_73_P081146|509227	0.0104978	0.000698198	down	1.6388	-1.6388	-0.712643	FRK	fyn related Src family tyrosine kinase [Source:HGNC Symbol;Acc:HGNC:3955] [ENSBTAT00000026661]	TTACCAACTGGGCAATACTGAAGGACAGTCTAAGATGAAATATCATCTCCCCACTGCCTG
A_73_P046121|506308	0.0125563	0.000974324	down	1.63918	-1.63918	-0.712974	PDXP	Bos taurus pyridoxal phosphatase (PDXP), mRNA [NM_001035035]	TAAATAGAACAATCTAGAAGTCTGAGAGACAGTGGCCTCTCGACTATCTGGGTCTGACTG
A_73_109923|783525	0.0081361	0.000436473	down	1.63985	-1.63985	-0.71356	CARNS1	carnosine synthase 1 [Source:HGNC Symbol;Acc:HGNC:29268] [ENSBTAT00000023529]	ACTCTTTCTCCGTGCAGCACAGGAGCTGTGGACAGCTCCACAGGCATCCCTCTCCAAATA
A_73_110781	0.0143115	0.00123498	down	1.64112	-1.64112	-0.714684		PREDICTED: Bos taurus KIAA2022 ortholog (KIAA2022), mRNA [XM_015461636]	CAAAACATGTTGTGAACGAGTGTAGTGATATTGTGCAAAAGAAAATGAACATTTGTGAGC
A_73_117599|538758	0.0281541	0.00366361	down	1.64263	-1.64263	-0.716004	C10H15orf41	Bos taurus chromosome 10 open reading frame, human C15orf41 (C10H15orf41), mRNA [NM_001015668]	CCCCATGTTGACATTATATTCTTTATAATGTTGAGTGAGTTTGGAAATATTAGTAAAAAT
A_73_102722	0.0375851	0.00575329	down	1.64332	-1.64332	-0.716612		myomesin 3 [Source:HGNC Symbol;Acc:HGNC:26679] [ENSBTAT00000019817]	TGTCACCTTCCTGGACCGCTACCACATGGATGTGAAGGGGACAGAGGTCACCATCACCAT
A_73_P042906,A_73_P259641|528138	0.0334955	0.00483696	down	1.64414	-1.64414	-0.717335	KLHL13	Bos taurus kelch like family member 13 (KLHL13), mRNA [NM_001102511]	CTGGTGAGCTGCTTTTGCTCAGTGAATTCAATTTCCATGTTCTATCTTTTTTGTTCAATA///TTAACAGTTTCGTCTTGAAGAATTTTCCTGCGTTGCTGAGCACTGGGGAGTTCTTGAAAC
A_73_107502|615920	0.0248429	0.00302118	down	1.64465	-1.64465	-0.717778	SLC2A11	Bos taurus solute carrier family 2 member 11 (SLC2A11), mRNA [NM_001193097]	AGCTTCATGGAGATATCGGAGGAGCTGCACAGACTCAACTTCCCCGGGAGGAGCCGAGGC
A_73_119667	0.0415328	0.00673501	down	1.64602	-1.64602	-0.718984		GB	AGACTATTCCATGGAAGCCCGATTACAGTTTAGAGCTCACATAGCCCTTGAACAAATAGC
A_73_P087122|100125834	0.0047192	0.000160682	down	1.64706	-1.64706	-0.719893	STOM	Bos taurus stomatin (STOM), mRNA [NM_001105473]	GGACTATTTCATTTGATATTCCTCCTCAGGAGATCCTCACTAAGGACTCGGTCACCATCA
A_73_108965|535837	0.0212511	0.00232309	down	1.64941	-1.64941	-0.721952	TRMT61B	Rep: LOC535837 protein - Bos taurus (Bovine), partial (41%) [TC401593]	GTTGAGGAAGTGCAAACCACAACTTAACTGAGTACCTCAGATAACAACTGATTTGAAGAC
A_73_P069071|615443	0.033246	0.00477925	down	1.64957	-1.64957	-0.72209	MTMR10	Bos taurus myotubularin related protein 10 (MTMR10), mRNA [NM_001193073]	TTAAAGAACGGCATCATCAGTGAGGAGGAGTTACGGCCAAGAAGAAACTCACTAATCCTG
A_73_P109876,A_73_103656,A_73_P302321|530233	0.0251557	0.00308899	down	1.64975	-1.64975	-0.722245	PPM1N	Bos taurus protein phosphatase, Mg2+/Mn2+ dependent 1N (putative) (PPM1N), mRNA [NM_001102128]	CTCTTTGCTTCCTATTTTTCATCTATTTGGCAGGAAGGTTGGGGAAAGTTTTTATGATTA///ACTCTGGCCTCTGAGGACATCCTGGATTTACCTCCTGGGGGAGGACTCTACTGCAAGTGA///TTTTCCTACTTCCCTCTCATAAGACGTTTTATGAGAGAGGGGAAATTCCACCCACCAGCT
A_73_101399|515935	0.0116656	0.00085521	down	1.65056	-1.65056	-0.722959	NAGPA	Bos taurus N-acetylglucosamine-1-phosphodiester alpha-N-acetylglucosaminidase (NAGPA), mRNA [NM_001206618]	GCTCTCTCTTTTGCCCTGCCGCTGAGAGGGTTTTTCTACCACTTGAATAAATTGATAAAA
A_73_P300666	0.0155054	0.00141101	down	1.65196	-1.65196	-0.724182		Rep: Peroxidasin homolog - Homo sapiens (Human), partial (96%) [TC403550]	ATCAACCAGCTCACGTCCTACATCGACGCCTCCAATGTGTATGGCAGCTCTGAGCACGAG
A_73_P036101,A_73_P093181,A_73_P397711,A_73_112314|526961	0.00869445	0.000489332	down	1.6564	-1.6564	-0.728051	LRRC40	Rep: LRRC40 protein - Bos taurus (Bovine), complete [TC403454]///Bos taurus leucine rich repeat containing 40 (LRRC40), mRNA [NM_001103262]	GAAACAAATTTTACATAACTGAAGGGTCCTTCCTGGGACTAGTTAATTGCCTTTACCAAA///ATCTTAATGAAAGGAACAGCTGCTATTTTGGAGTATTTGAGAGACCGAATTCCTACTTAA///GGTAGATGAAATGAATGGGAAAGAAGGGAGCCATCAGATTTTCTTATAAAATTTAGTGGT///AAATACTACATGTTCATTAAAAAGTTACATTTTTCAAATATTGATTACAATGTTTATGTT
A_73_P039931|505574	0.0317396	0.00440897	down	1.65789	-1.65789	-0.729344	CD59	Bos taurus CD59 molecule (CD59), mRNA [NM_001037446]	AATGCAGTTTTGAGTTCATTGCAAAAGCCTTAGGGGAGAAGGAGCTCCACTATGACTGCT
A_73_109267|525813	0.00120268	1.13426e-05	down	1.65949	-1.65949	-0.730743	ME3	Bos taurus malic enzyme 3 (ME3), mRNA [NM_001075877]	GACCATCTGATGCAACCTCAAAGGCTGGGATAGGGCTGGATGAAGCCCAGGGTAACACTG
A_73_P039411,A_73_P116001|615926	0.0156672	0.00143571	down	1.6625	-1.6625	-0.733353	GULP1	Bos taurus GULP, engulfment adaptor PTB domain containing 1 (GULP1), mRNA [NM_001079509]	AATGCAAAGTTTCTTGGCAGCACAGAAGTAGAGCAGCCCAAAGGAACAGAAGTTGTAAGA///ATACTTAACTTCACAAATAGATTCTTCCTGTCATGAGAATATGCTTCAGGATTTCATCCC
A_73_100796	0.0487749	0.00869157	down	1.6638	-1.6638	-0.734481		Rep: COG0111: Phosphoglycerate dehydrogenase and related dehydrogenases - Burkholderia dolosa AUO158, partial (9%) [TC440712]	TAAGGCACTTGGCCTTCCTTTGTGACTTCCGTGTCTATTAAAGCATGAGTTCCCTTGGTT
A_73_100674	0.0333042	0.00479535	down	1.66435	-1.66435	-0.734959		Rep: Solute carrier family 12 member 2 (Bumetanide-sensitive sodium- (potassium)-chloride cotransporter 1) (Basolateral Na-K-Cl symporter). - Canis familiaris, partial (4%) [TC452304]	CCCAAATATGCCTTATACTTCAGTTTACATTTCTGCACCCATCCCAAACATACATATTAA
A_73_P037411|519974	0.0375366	0.0057387	down	1.66556	-1.66556	-0.73601	NSMCE2	Bos taurus NSE2/MMS21 homolog, SMC5-SMC6 complex SUMO ligase (NSMCE2), mRNA [NM_001075797]	TCAGTGCGATGATAAGTGATGCCATAATGGAAACTTTGCTGCAGCCTTCTGAGAGCCTAA
A_73_P170052	0.0217743	0.00241105	down	1.66662	-1.66662	-0.736928		AV598194 Bos taurus cartilage fetus Bos taurus cDNA clone E1CA036E08 3', mRNA sequence [AV598194]	CAGAATGAGGACAGTGATGGACAGACAGATGGCAATAAAGACTTTCTTCTTGCGCACCTT
A_73_102526	0.018451	0.0018511	down	1.67123	-1.67123	-0.740912		Rep: Reverse transcriptase-like - Bos taurus (Bovine), partial (8%) [TC448453]	TTAAAGACCGGAAATGCTGGTCATCTTAGTTTTTTGTCTGGTGCTTTCTGTATAATGATG
A_73_P479973	0.040015	0.00635446	down	1.67169	-1.67169	-0.741307		mitogen-activated protein kinase kinase 7 [Source:HGNC Symbol;Acc:HGNC:6847] [ENSBTAT00000014063]	TTTCATCACCAATACGGACGTCTTCATCGCCATGGAGCTCATGGGCACGTGCGCGGAGAA
A_73_P044881|513953	0.0147421	0.00129465	down	1.67366	-1.67366	-0.743007	SLC26A2	Bos taurus solute carrier family 26 member 2 (SLC26A2), mRNA [NM_001040525]	GACTCTCAGAATCAAAAAGAGAGACATATTCCCAATGGTCCGAATTTTTCCAGTGATTGA
A_73_107400	0.0269909	0.0034205	down	1.67509	-1.67509	-0.744236		Rep: PAPS synthase 2 - Oryctolagus cuniculus (Rabbit), partial (42%) [TC465889]	TTTTTTCCAGCTGAAGTCTTGCCAGCTTGCACTCTCCCATGTCATATACCAGTAGAAGAA
A_73_116317	0.0374613	0.00572433	down	1.67582	-1.67582	-0.744867		765282 MARC 6BOV Bos taurus cDNA 5', mRNA sequence [CB533831]	TCATGTTTTGATTTATTTCAAATATGCAGTATTTGAAAAATGTCAATACATAAAGGAAAC
A_73_115099	0.0468111	0.00815039	down	1.67619	-1.67619	-0.745188		Rep: THAP domain containing 5 - Canis familiaris, partial (23%) [TC415443]	AAACCATTCTGAAGCATAGCTTAAGAGGAGCCAAAGATAACACATACATAAATTATCAGG
A_73_P472388	0.00920327	0.000540682	down	1.67759	-1.67759	-0.746394		Rep: Zinc finger protein 83 - Homo sapiens (Human), partial (69%) [TC422921]	ACCTACAGCTCAAATCTTATTCAACATCAGCGAATTCATACTGGAGAGAAACCTTATAAA
A_73_P104636	0.0414446	0.0067045	down	1.67834	-1.67834	-0.747032		Rep: NADH-ubiquinone oxidoreductase chain 2 - Celeus brachyurus, partial (6%) [TC419585]	CCTATCACTAAGTGAATACCACTGTTAATTTGTATTTTAGTATACACAGTGTTCCACACC
A_73_P362021,A_73_P069611|506525	0.0124535	0.000960934	down	1.68097	-1.68097	-0.749292	RCOR1	REST corepressor 1 [Source:HGNC Symbol;Acc:HGNC:17441] [ENSBTAT00000003016]	TTATCGACGCCGCTTCAACATAGATGAAGTTTTACAAGAATGGGAGGCAGAGCATGGGAA///TCAACATAGATGAAGTTTTACAAGAATGGGAGGCAGAGCATGGGAAAGAAGAGAATGGTC
A_73_109716	0.0153563	0.0013826	down	1.68229	-1.68229	-0.750426			CATATTAAAAGCCACAACATGTTATAAGCTGAGATCTCAGGTCAAATGGTGCCTCTCAAC
A_73_P143436	0.0184627	0.00185402	down	1.6847	-1.6847	-0.752488			GTACAGGGTGGCCACCAAATCTGGAAACAACAACAATAAAAAACCATACACGACGAAAAA
A_73_P127566	0.0180154	0.00178709	down	1.6853	-1.6853	-0.753002		1449971 MARC 11BOV Bos taurus cDNA 3', mRNA sequence [DY453691]	CAAAAGTCAGAGCATGGGCACGGAGTTTTAAATCACAGACACAGAAAGAATAAAACCCCT
A_73_P390736,A_73_120617,A_73_P037766|521304	0.0231135	0.00266966	down	1.68918	-1.68918	-0.756325	RBFOX1	Bos taurus RNA binding protein, fox-1 homolog 1 (RBFOX1), mRNA [NM_001075818]	TCAAGACAACAGATGAATTGTGAAAGAGAGCAGCTAAGGGGTAATCAGGAAGCAGCAGCT///TCGTTCTTTCTTCATTGCAGGCTAGTATATACCGAGGGGGATACAACCGTTTTGCTCCAT///AAATGGCTGGAAATTGAATCCAGTTGTGGGTGCAGTGTACAGTCCTGAATTCTATGCAGG
A_73_P100411	0.0276112	0.00354233	down	1.6896	-1.6896	-0.756679		Hw_loin_32_050705_E06 Bos taurus CF-24-HW loin cDNA library Bos taurus cDNA, mRNA sequence [DV792956]	TATAATCGATAAACCCGATAACCTCACCAATTCTTGCTAATACAGTCTATATACCGCCAT
A_73_P069696|526376	0.00654794	0.00029452	down	1.69417	-1.69417	-0.760582	STK10	Bos taurus serine/threonine kinase 10 (STK10), mRNA [NM_001192627]	ATCTGAACCAGAAAAAGCGAGAGCAGGAGATGTTCTTCAAGATGAACGAGGAGTCAGAGT
A_73_P416336	0.00621856	0.000266408	down	1.6942	-1.6942	-0.760602		coiled-coil and C2 domain containing 2A [Source:HGNC Symbol;Acc:HGNC:29253] [ENSBTAT00000065167]	GAAAAAGATCGAACATTGCTTAAGACCATCATAAAAGTCTGGAAAGAGATGAAGTCCCTC
A_73_P340701	0.0407306	0.00653898	down	1.69445	-1.69445	-0.760819		Rep: ARF GTPase-activating protein GIT2 - Mus musculus (Mouse), partial (25%) [TC445307]	TGACTGAATGCTGTCAGAAGGAGTACGGTGATGGTATTTGGTTACTAAGTCACTGTGCTG
A_73_121284	0.0229456	0.00263712	down	1.69687	-1.69687	-0.762873		Rep: PAOX protein - Bos taurus (Bovine), partial (11%) [TC474755]	AAATACGAAGTCATGAATTCCCTCCAGAGATTGGAAATCTGATTCTGAGTGAAAGTGACA
A_73_107818	0.0115699	0.000844216	down	1.7047	-1.7047	-0.769514		Rep: Tigger transposable element-derived protein 3 - Homo sapiens (Human), complete [TC401130]	AATTTACAGACAGACCGACCCCTTGAACTCCGTGTTCAAAACAGTTCTGCTTCTGGAAAT
A_73_118967	0.00327301	7.52908e-05	down	1.7069	-1.7069	-0.771379		Rep: Chromosome undetermined scaffold_22, whole genome shotgun sequence - Paramecium tetraurelia, partial (8%) [TC401583]	AATCCCGTGTTTTAGTCACAACAGTGAAATGGCACAGTGTAAAGCCACTCTGCATCTAGT
A_73_P046016,A_73_113899|616544	0.0414519	0.00670883	down	1.7111	-1.7111	-0.774926	TRMT10A	Bos taurus tRNA methyltransferase 10A (TRMT10A), mRNA [NM_001035477]	ACAGTAACCCATTTAAAGGTCTGTGAGAAATGTATGTAAATAAAGAAAAGCCCCCACAGT///ACGAGGAAGAAAAGCAGGATAAAGAAAATAGCACTGAATCTACAGTGAACTCTGTACCAC
A_73_112725	0.0109099	0.000758569	down	1.71234	-1.71234	-0.775967		Rep: Non-specific serine/threonine protein kinase - Methanococcus aeolicus (strain Nankai-3 / ATCC BAA-1280), partial (6%) [TC411140]	TATACTATGGAAATGCATTCAGATGGTTATTTTTCCAAATAAAAGCGGTACAAATATTGT
A_73_P347201,A_73_120162|533070	0.00470281	0.000159106	down	1.71422	-1.71422	-0.777551	SPATA5L1	Bos taurus spermatogenesis associated 5 like 1 (SPATA5L1), mRNA [NM_001105625]	ATACACCAGCAATTGTGTTTTTGGATGAGATTGATTCAATCTTGGGCTCTCGATCAATCA///CCTGCTCAAGGCTTAATTGAAATGTGAATATGCACTATAATTTGCAACTTACTTTGTGTG
A_73_100169,A_73_P414091|533243	0.0020232	3.08231e-05	down	1.71517	-1.71517	-0.778355	ZNF143	Bos taurus zinc finger protein 143 (ZNF143), mRNA [NM_001102154]	ATCAGATTGCAAACTCCTAGAGTCTACGTGCAAGAACCAGTGAAGTCTTACGGAGTCTTA///AAGATAGTTATGACCAGAGTGCATTACAGGCAGTTCAGTTGGAAGATGGCACCACAGCTT
A_73_104771	0.0442691	0.00747622	down	1.71542	-1.71542	-0.778565		Rep: LOC526059 protein - Bos taurus (Bovine), complete [TC447129]	ACAGTCTTGACTTGAAAAATACAAAAATAAAAATTCAGAAGGCCTTTTTGGCACCCAGTG
A_73_P081111|100139498	0.012064	0.000906987	down	1.71638	-1.71638	-0.779367	MCM9	minichromosome maintenance 9 homologous recombination repair factor [Source:HGNC Symbol;Acc:HGNC:21484] [ENSBTAT00000002665]	TCACTTTACCAGAACTAGATGATGAACCATTAGATTTTGATTGGGATGAGGAAATGAGAA
A_73_P393541,A_73_110622|617430	0.00463871	0.000154873	down	1.72021	-1.72021	-0.782581	C15H11orf70	Bos taurus chromosome 15 open reading frame, human C11orf70 (C15H11orf70), mRNA [NM_001046598]	GTAAAATGTAAAGAACCTGTGCAGAGCAGAAGAAAACAAATACCAAGATGCCTTTCTTTT///AGATTTGTTTCTGGAACTGTGAAAAGCATAACAATTCCTGTGTTTCATTTGTCCCACTTA
A_73_P058816|100140434	0.0423762	0.0069477	down	1.72023	-1.72023	-0.782601	ZKSCAN1	Bos taurus zinc finger with KRAB and SCAN domains 1 (ZKSCAN1), mRNA [NM_001205510]	TTCAACCGAAATTCATACCTTATTTTGCACCGGAGAATTCACACCCGAGAAAAGCCCTAT
A_73_116296	0.0169311	0.00163169	down	1.7203	-1.7203	-0.782658			ACAGAATCATTGCATGACAGACAGACCCAACTTGCAAGCAATTAAAAGCTTTAACTGGAT
A_73_P110931,A_73_103953|781710	0.024	0.00285505	down	1.72055	-1.72055	-0.782866	LOC781710	PREDICTED: Bos taurus uncharacterized LOC514143 (LOC514143), mRNA [XM_591946]	GAGCAACTTCAAGATGTCAAACAATTGCCACTAAAGTTGAAGTCATAAGATGCATTTTCA///CAGCTTCTATCTGTTAAGAACAAGTTAAATGAGCAACTTCAAGATGTCAAACAATTGCCA
A_73_106526|509158	0.0111646	0.000800326	down	1.72134	-1.72134	-0.783533	CCDC150	PREDICTED: Bos taurus coiled-coil domain containing 150 (CCDC150), mRNA [XM_001787516]	CTGGCCTGTTTCAACAGTCATCAGAACATGAAGTCTTTGATGTGGGCTGAGGATTTTGGA
A_73_P111571,A_73_P254341,A_73_117206|513055	0.0411858	0.00664414	down	1.72283	-1.72283	-0.784782	RGS2	Bos taurus regulator of G-protein signaling 2, 24kDa (RGS2), mRNA [NM_001075596]	GCCAAAACTGTCCTGATGGCAGCTAAACTTTGAAGTGGTCTTTGAATACTTTTAATAAAT///GCAGGAGCTTAAGACTGAAAGATAACAATGTAACACTATTGGTCCAGAAGCATTTACAAT///GTACTAGAATGAGTGCTTTTGTGTAGAAAATGACAATGTCCATTATGAGTGCCAAAACTG
A_73_109821	0.00503573	0.000184586	down	1.72632	-1.72632	-0.787704		Rep: MGC166395 protein - Bos taurus (Bovine), partial (24%) [TC445659]	CTACCCTTGTGAAAGCTACTTACTGGCTAGTGCCAGGATGGCTGGCAGAAAATACATTAA
A_73_120867	0.0203482	0.00216535	down	1.72636	-1.72636	-0.787733		PREDICTED: Bos taurus uncharacterized LOC100850738 (LOC100850738), miscRNA [XR_138634]	GACATCTTTAGGGAAAATGAACCTAGTTAACTTGAGAGTTACACTGAACATATACATGCT
A_73_P057686|107133083	0.0273777	0.00349669	down	1.7284	-1.7284	-0.789439	LOC107133083	PREDICTED: Bos taurus endogenous retrovirus group PABLB member 1 Env polyprotein-like (LOC107133083), partial mRNA [XM_015466191]	GCTTCACTTTGGGAAACGTTAACTAGTTCCCCATGGTGGACAACTATCTTAATTACAATA
A_73_103857	0.00123443	1.22644e-05	down	1.72992	-1.72992	-0.790709		LB0296.CR_J17 GC_BGC-29 Bos taurus cDNA clone IMAGE:8231923, mRNA sequence [DV924864]	GTTTTCTCTTTAGAGACTTTGAGACTTACAAGATGAGATTGAGAAAAAGCCATTTGCTTG
A_73_P133011	0.0133626	0.00108472	down	1.73118	-1.73118	-0.791757		LB01365.CR_J19 GC_BGC-13 Bos taurus cDNA clone IMAGE:8442549 5', mRNA sequence [EH157957]	CAGCCAGAAGCAATTTCAAATGAATATATGTTGACTCAGGTTTAGAAATGCTTCAGAATG
A_73_107655	0.00594382	0.000248056	down	1.73165	-1.73165	-0.792152		Rep: Isoform 4 of Q69YN4 - Homo sapiens (Human), partial (20%) [TC434834]	CCACCATTAACTAGGTTGCTTCATCAATGGACTCTGCTCTACTGACTGCTAACCTGAGAA
A_73_P068086|538513	0.00831157	0.000450521	down	1.73854	-1.73854	-0.79788	SYT3	Bos taurus synaptotagmin III (SYT3), mRNA [NM_001192033]	TTGACCAGCTTCACAAAAGGCAGCAAAGGATTGTCAGAGAAAGAGAACTCAGAGTGAGAG
A_73_112946	0.0424945	0.00699156	down	1.74298	-1.74298	-0.801559		Rep: Probable cystathionine gamma-synthase (EC 2.5.1.48) (O- succinylhomoserine (thiol)-lyase) - Schizosaccharomyces pombe (Fission yeast), partial (3%) [TC425046]	TTTCAAAGGGTCAGAATGTATTAGTAGGCTGTGAAATCAATCTCATGATTTACAACTAGC
A_73_P460006,A_73_115929,A_73_P464401,A_73_P443596|280719	0.00140234	1.56459e-05	down	1.74384	-1.74384	-0.80227	AMT	Bos taurus aminomethyltransferase (AMT), mRNA [NM_177485]	CTGGGACTTATTATTGGACTCCACAGACTACTGAAAAAATAAATAAATAAGTGAGCTTCC///CTTATCCTGAGCTGACCTTCACCCCTGGGACTTATTATTGGACTCCACAGACTACTAAAA///GAGGCATCTTAGATGACTTGATTGTGACCAGCGCCTCCGAGGGACACCTGTATGTGGTGT///TTGTATGGGAACGACATTGATGAGCACACCACACCGGTGGAAGGCAGCCTGAGCTGGACA
A_73_P034106|528920	0.0194231	0.00201425	down	1.7448	-1.7448	-0.803063	EVI2A	Bos taurus ecotropic viral integration site 2A (EVI2A), mRNA [NM_001034568]	GTTATGCCAGATGCTTTCATCTTTACATGTGGTGTACATAAGAAAGTCGTTTTCTACTAT
A_73_111355,A_73_P363951|509263	0.000306496	2.7126e-07	down	1.74648	-1.74648	-0.804448	C16H1orf159	Bos taurus chromosome 16 open reading frame, human C1orf159 (C16H1orf159), mRNA [NM_001031755]	CTCGGTCACCAGGACATGAATGGATGACTAGCTGGTGGTCATGAGGGGCAACCACCTGAA///TCTCCGTGGCTGCATTCTTCTACCTCAAGCGAGCCAGCAAGCTGCCCAAGGTCTTCTATG
A_73_P216617,A_73_115244|511802	0.0234064	0.00273209	down	1.74797	-1.74797	-0.805683	CDK19	Bos taurus cyclin dependent kinase 19 (CDK19), mRNA [NM_001205707]	CACAGAATCTAACTCTTTTGTTCATGGAAATCTTAAACAGGAACTGTTACTGTCCCAAAG///AAGATGAACCTGAAGAAAAAGGTGACAAGAACCAGCAACAGCAGCAGAACCAACATCAGC
A_73_120439	0.0255468	0.00315751	down	1.7549	-1.7549	-0.811388		Rep: Kelch-like protein 32 (BTB and kelch domain-containing protein 5). - Canis familiaris, partial (47%) [TC431927]	TTTAAGGAGGGCAATTATTGATTTACATATTAATTCAGAAGAACGTTGTGAGGATTGGGC
A_73_P057326,A_73_108652|100336965	0.0169558	0.00163537	down	1.76692	-1.76692	-0.821238	TENM1	Bos taurus teneurin transmembrane protein 1 (TENM1), mRNA [NM_001256555]	CTTTCTGACAGTGCCAATAATATTCACTTTATGAGACAGAGCGAAATAGGCAGGAGGTAA///ATACACTAATCCAATGGTTTTGTGCACATGAAAGGTAATTTACTACCAAGTGTGATTCTG
A_73_P034506|515411	0.004722	0.000162629	down	1.77126	-1.77126	-0.82478	CXHXorf58	Bos taurus chromosome X open reading frame, human CXorf58 (CXHXorf58), mRNA [NM_001102023]	GGAAAAAGAGGAAAAGGAATTATTTGCCTGGTGTCAAGACTTGTTTATTAATAACTCTCC
A_73_P037386|751574	0.0314459	0.00434475	down	1.77436	-1.77436	-0.827296	LOC751574	Bos taurus secreted and transmembrane protein 1B (LOC751574), mRNA [NM_001076528]	AAGAACCAGTTTGAGGGACGTTCCAGGAAGCACTTGAGGAACCAAAATGAGGATATCAGT
A_73_116830|535385	0.0137183	0.00113902	down	1.7771	-1.7771	-0.829521	UNC45B	unc-45 myosin chaperone B [Source:HGNC Symbol;Acc:HGNC:14304] [ENSBTAT00000003766]	GTAGGAGCTAACAGGTCCTACTTTAAATATGTAAAGTAGTGTGACTATAAAGTTTAGTGC
A_73_P050281,A_73_P203322|789612	0.0153951	0.00139229	down	1.77879	-1.77879	-0.830899	LOC789612	Bos taurus uncharacterized LOC789612 (LOC789612), mRNA [NM_001105022]	TTGGACTGGGGACATAGCTGCCATAGAGACCATCGGAGGAAATAATTGGAAGGAAACAAT///TCAACGCTGTGCAGTACGTGGATAACTCCGCCAACACGAGCTGCTTTCGCGGGTTTCAGA
A_73_P051641|525334	0.0301988	0.00407725	down	1.77943	-1.77943	-0.831418	MMD2	Bos taurus monocyte to macrophage differentiation associated 2 (MMD2), mRNA [NM_001075870]	CTGCCCAGGCTTCATTTCCTATCAGCATGCTAATGACTTTTGAAAGTTATTATTATTGTT
A_73_109378	0.0325645	0.004598	down	1.77946	-1.77946	-0.831437		Rep: Toll-like receptor 3 - Bos taurus (Bovine), complete [TC433095]	ATCTTTTACTAATGAACACACAGGTTACTGAGGCCTATGAAAACAGTTTTGAAATAGTCC
A_73_P272381	0.0386489	0.00604009	down	1.78048	-1.78048	-0.83227		myosin VC [Source:HGNC Symbol;Acc:HGNC:7604] [ENSBTAT00000004905]	GTCGAATCACAATCAAGAAGAAGAAGGAACACAGAGCAAGACCATAGAAGCCCAAAATGA
A_73_P174057	0.0206998	0.00223139	down	1.78067	-1.78067	-0.832424		594625 MARC 6BOV Bos taurus cDNA 3', mRNA sequence [CB421597]	AGTAACTACTGCATCTGTGACATTACAAACGGCAATCACAGTGTGGATGAGATGCAAGTC
A_73_107376	0.0071632	0.000349544	down	1.78068	-1.78068	-0.832428		PREDICTED: Bos taurus uncharacterized LOC104973218 (LOC104973218), ncRNA [XR_809445]	CAATGGAAAAGCACATAAACCTCTATACACACAAGTTTTCTCATTTGTAAAGTGGGAATG
A_73_P174812	0.0236565	0.0027933	down	1.78095	-1.78095	-0.832643		693743 MARC 6BOV Bos taurus cDNA 3', mRNA sequence [CB442901]	GAGTAACTGAAACCATGGCTGTCTGGATTGAGGAAATAAAAACAAAGCTGAATACATTTG
A_73_P178337,A_73_108889|539464	0.0488427	0.00871124	down	1.78098	-1.78098	-0.832671	PCDH18	Bos taurus protocadherin 18 (PCDH18), mRNA [NM_001102229]	CTTGTAATATGAGAGGTGTCCCAAGGAAATAGAATCTTGTCCTTTAAATGGATAACTGTA///TCTCTGTGTGGAATGCCTTGGTAAGGGACATTGGTGTTATGACTGTTCTCGTTTATGACC
A_73_114429|504372	0.0459869	0.00790855	down	1.78654	-1.78654	-0.837171	TMEM130	Bos taurus transmembrane protein 130 (TMEM130), mRNA [NM_001083369]	CACCGTTGTACAGCTCATACTCATAAATACTGCCGTTATTGCTGAATAAAGCTTGTGTGC
A_73_117326	0.00629498	0.000274249	down	1.79457	-1.79457	-0.843641		Rep: Cytochrome b - Bungarus flaviceps, partial (6%) [TC420669]	GGTAGGGTAGGGCTCCATCTGCTTTTTGTCACCATCAACTGTAAAGGGGGAATATATCAA
A_73_P252351,A_73_P109671,A_73_P362844,A_73_113038|515940	0.0115632	0.000842432	down	1.79766	-1.79766	-0.846121	THRSP	Bos taurus thyroid hormone responsive (THRSP), mRNA [NM_001040533]	ATCTGACTAACCAAAGTTCACATCCTTCTCTCTTGGCAGTCATTAACTGCAATTGTGGCC///GTGATTTTGTCCATCTGCTTATATTCATACTGCCACCTAATCTCAAATCACATGTAAACA///TAAGACCAGAAAGACCTGGACCTGCAACTACAAGTGATGATTTGGATGTCTGGGAATCCT///GACCCTGCAACTACAAGTGATGATTTGGATGTCTGGGAATCCTCCCTACCTTCCTCTGAG
A_73_P495163	0.0364262	0.00547854	down	1.8022	-1.8022	-0.849762			CCAGTAGCTATAATAGACCTGGACAAATACTTGGCAAACTATTCAAGGAACAAACTTATT
A_73_P043616|408003	0.0235094	0.00275847	down	1.8055	-1.8055	-0.852401	ATG4A	Bos taurus autophagy related 4A cysteine peptidase (ATG4A), mRNA [NM_001001171]	GACTCTACTGAACAACTAGAGGAATTTGACCTGGAGGAAGATTTCGAGATTCTGAGCATA
A_73_100689	0.0110956	0.000792243	down	1.81373	-1.81373	-0.85896		Rep: ABC transporter permease protein - Labrenzia aggregata IAM 12614, partial (6%) [TC453465]	AGTCCCTCTCAAAACTTCAAAGCCTTAGAAATACTTCCTCAAGCCAGCATCTTGAGATCT
A_73_100410,A_73_P446646|504323	0.0123249	0.000941189	down	1.8145	-1.8145	-0.859575	THBS3	Bos taurus thrombospondin 3 (THBS3), mRNA [NM_001101839]	CCTTCAACGGTGTGGACTTTGAAGGCACCTTCCATGTGAACACTGTGACGGACGATGACT///CTCAGGCACTAACCCCAGGAAAGATAACAGCACATTGCCATAAAGTTTCAGTTCTTTTCT
A_73_114371|281759	0.0167409	0.00160314	down	1.81656	-1.81656	-0.861209	FABP4	Bos taurus fatty acid binding protein 4, adipocyte (FABP4), mRNA [NM_174314]	AATGGATGACGTTTGCATCGAACTCCATGACTTTCTGCTGGATACGTTGTCCAAACATAT
A_73_P078691	0.0384797	0.0059872	down	1.82043	-1.82043	-0.864281		sex comb on midleg like 1 (Drosophila) [Source:HGNC Symbol;Acc:HGNC:10580] [ENSBTAT00000023476]	GCCTTGAAGATTTGCCACTATATTGACAGGCTTAAAAGAGAAAGATACATCCCCAATTGA
A_73_P040421,A_73_P330311|281801	0.0018794	2.64795e-05	down	1.82224	-1.82224	-0.86571	GRK5	Bos taurus G protein-coupled receptor kinase 5 (GRK5), mRNA [NM_174331]	CCAGAGCCTCAAATGAGAAAATGTTTTTATTAAATGTAGAAAATGATCCACGCTTCACCT///AAACCTGAAAATATCCTGTTAGACGATTACGGCCACATTAGAATTTCGGACCTGGGCCTG
A_73_112108	0.0226097	0.00257607	down	1.82331	-1.82331	-0.86656		Rep: ZNF154 protein - Homo sapiens (Human), partial (12%) [TC446341]	ACTCTGCTGAGAAATGAAGGCACTTACATAAGCAGCACTGTGAACTGCACAGGGAAGAAA
A_73_P090571|541051	0.0276345	0.00355039	down	1.82398	-1.82398	-0.867088	TBC1D30	TBC1 domain family member 30 [Source:HGNC Symbol;Acc:HGNC:29164] [ENSBTAT00000015086]	CTTTTAGGCAAGAAGATGAAAATGTCAAACAGAGCCGCCAAGAATGCTGTCATCCACATC
A_73_102550	0.0123506	0.000945043	down	1.82768	-1.82768	-0.870013		Rep: SH3, type 3 precursor - Burkholderia ambifaria MC40-6, partial (10%) [TC461666]	GTGGAGTTTACAGAAAACAACTGACCTACAAAGGGGAATGGGCCATTTTATGCGCAATAA
A_73_P060261|100336729	0.00339146	8.24515e-05	down	1.83769	-1.83769	-0.87789	C26H10orf76	chromosome 10 open reading frame 76 [Source:HGNC Symbol;Acc:HGNC:25788] [ENSBTAT00000017436]	TAAACTACTTTGCTATCAGAAGAAGTGTAGAGTACGCCTGCATTATACCTGGCGGGAGCT
A_73_119181,A_73_P251341|515900	0.0262023	0.00328325	down	1.84339	-1.84339	-0.882363	PLA1A	Bos taurus phospholipase A1 member A (PLA1A), mRNA [NM_001015610]	CCATATGCTTGGACAACTGTACCTAGGATTCAGTAGAAACATATACAGGAGAAATACTTT///TGTCTGGATTGTTTCAACCCTTTTCTTCTTTCCTGTCCAAGAATCGGGCTGGTGGAACAA
A_73_P492948	0.031142	0.00428306	down	1.84515	-1.84515	-0.883741		GB	TTTTGTCAGAGTGGTCATCTCAGTAAACATCTGAGAACACACACTGGAGAGATACCCTAG
A_73_P398186	0.0254805	0.00314069	down	1.8505	-1.8505	-0.887917			CTTCCTATCAGACTTTTGGAATAGACACACACTGTACAGTTCAATCGTTAGAGAACCTAA
A_73_P322406,A_73_104071|507010	0.00451288	0.000145432	down	1.85177	-1.85177	-0.888902	COL16A1	collagen type XVI alpha 1 chain [Source:HGNC Symbol;Acc:HGNC:2193] [ENSBTAT00000038016]	TCCATGGGAGACATGGTGAATTATGATGAAATCAAGAGGTTCATCAGAACAGAGATCATT///GGCTCCATTGGGAACAAATGGCTCCAACTTTATAGGACTCTGGATGGGTTGTGAATGTTT
A_73_P161182	0.0180154	0.00178709	down	1.8543	-1.8543	-0.890872		Rep: Erythroid membrane-associated protein precursor - Homo sapiens (Human), partial (31%) [TC429023]	CCCTCTGAGATTCAGAGAGGAATTTTTTGTTTGCTTTTGTACAGTCCTTAAATAAAAGCT
A_73_P065736|509296	0.000789726	4.0406e-06	down	1.85614	-1.85614	-0.892309	GSDMB	Bos taurus gasdermin B (GSDMB), mRNA [NM_001244217]	ATTCTTTGATACATCCCATTCACTACGATACTGTCCAAAAATCAGCTAGATTATAGGCAT
A_73_P123506	0.0362221	0.00542709	down	1.86538	-1.86538	-0.89947		010115BSMA005427FL BSMA Bos taurus cDNA, mRNA sequence [DY179686]	ATAGAATGTAAGCAAGGCCTGCATCACAGTTCATACATATAAAAGGTGGTGAAATAAAGA
A_73_104638|535306	0.0478154	0.00841756	down	1.86893	-1.86893	-0.902214	TSNARE1	Bos taurus t-SNARE domain containing 1 (TSNARE1), mRNA [NM_001082446]	GCCTCCATGGTTTCAGAGCAAGGAGAGGCCATCGATAGTATTGAAGCCGGCCTTGAGGCT
A_73_108527	0.00533773	0.000204012	down	1.86972	-1.86972	-0.902823		Rep: COG1782: Predicted metal-dependent RNase, consists of a metallo-beta-lactamase domain and an RNA-binding KH domain - Streptococcus pyogenes M49 591, partial (29%) [TC447127]	AGACAACCAATGATAACATCTCAACTGACAACACAAAACCCTGCCCTAGAACAGGGCTTA
A_73_P205627	0.0424458	0.00696571	down	1.8705	-1.8705	-0.903423		PREDICTED: Bos taurus uncharacterized LOC540056 (LOC540056), partial mRNA [XM_591217]	AGCTTTGATAGGAATAATCTGAATGGAGAAAGCAAACTGCTGAAACTAACATTCCCTGCC
A_73_P040626,A_73_P370326,A_73_119769|511422	0.0289532	0.00383721	down	1.87643	-1.87643	-0.907987	COL6A1	Bos taurus collagen type VI alpha 1 chain (COL6A1), mRNA [NM_001143865]	TGCAGAACTACACCGTGCTGGCCAACACCGTGGACTCCATGGACTTCTTCAATGACGCCA///GTGTTTTTTCTCAACCGTGTTCATGTGGGCGACTTTTCCAAATAAAGGTTTTCACTCTCC///CTCATCCCAGTCGGAGCCCTGGCACCTGGTTCTCTGTCCTTTCTGGGGTCAGCTGTCACT
A_73_P080981|540234	0.0108144	0.000745324	down	1.87644	-1.87644	-0.908001	FAM46A	family with sequence similarity 46 member A [Source:HGNC Symbol;Acc:HGNC:18345] [ENSBTAT00000001319]	ACTTTAGCAATTACTACATTGCACAGGTCCAGCCAGTGTTCACATGCCAGCAACAGACAT
A_73_117927	0.0222478	0.0025153	down	1.87947	-1.87947	-0.910327		Ras association domain family member 6 [Source:HGNC Symbol;Acc:HGNC:20796] [ENSBTAT00000015836]	GAGAGATCCAAAGGACAGTAGCAAAATTCAGTACAGAAAAGGCAATCATACTGAAATATC
A_73_112497|3283878	0.00835814	0.000457881	down	1.8815	-1.8815	-0.911883	ND2	NADH dehydrogenase subunit 2 (mitochondrion) [Source:RefSeq peptide;Acc:YP_209206] [ENSBTAT00000060548]	ATAGCCGTCATCATTAACGTAATATTCTCAGGCCAATGAACCGTAATAAAACTATTTAGC
A_73_110035	0.0122976	0.000937695	down	1.88676	-1.88676	-0.915908		1398239 MARC 7BOV Bos taurus cDNA 5', mRNA sequence [DN546795]	TTACAAGGATCAAAACTAAAGCCTCAAAATGTTTTTCCTACCCAAACTTCCACCACCTAA
A_73_113543	0.038071	0.00587419	down	1.89199	-1.89199	-0.919907		Rep: Zinc finger protein 30 homolog - Homo sapiens (Human), partial (11%) [TC467646]	GGCTTGGAAAGCTTCATTCATGTTGGAGAAAATACCTTTGATCTAAAGTGGAAATAAATG
A_73_P150601,A_73_118245|615798	0.0202716	0.00215333	down	1.8944	-1.8944	-0.921745	PKIB	Bos taurus cAMP-dependent protein kinase inhibitor beta (PKIB), mRNA [NM_001114518]	TTACTTCCAAACTGCACCCAAGAGAGAGGTTAAGGATGTATGATCATTTAAATACATATC///TCTGCATGCAGTATTTTATTTGATTGTTGACTTAGGCCATGTCTGTATACAGTAATCAAA
A_73_P117121	0.0172969	0.00168676	down	1.90386	-1.90386	-0.928929		LB0291.CR_E05 GC_BGC-29 Bos taurus cDNA clone IMAGE:8284399, mRNA sequence [DV916217]	AAACATTTGAATGTCTGGTGAGAGAGAGCCATGTGTCATAAGTCAGAAGAAAGGACAGCT
A_73_P250856,A_73_102918|535424	0.0081069	0.000433668	down	1.90586	-1.90586	-0.930442	ATL1	Bos taurus atlastin GTPase 1 (ATL1), mRNA [NM_001034631]	TAGAATGCCAAGCACCTCTGAAGACTGCACAACAGCTTAGTTCTTTTACTTCAGTGTCTA///TCACATAGGCATTTGTTAAAACATAGCTCAATAGGCTTGATTCAACCTATACCATCTTAC
A_73_P280601,A_73_102921,A_73_P443141,A_73_P338261|505329	0.00419338	0.000125529	down	1.91579	-1.91579	-0.93794	CRISPLD2	Bos taurus cysteine rich secretory protein LCCL domain containing 2 (CRISPLD2), mRNA [NM_001100299]	AGTAAGTGATTCTGTATGAAGCCCACCTTTTAAATTTCACCCCTCGTTCTCTGTGGGTCC///ATTGTAAATTTATGTGTGCTTCGCTTGAACAGGGACCACGTTGCTGTCATTTCAATAAAA///TGAACTACATGACCCAAGTCGTCAAGTGTGACACCAAGATGAAGGACAAGTGTAAAGGGT///ATAGTTTGGGCCACAACCAACAGGATCGGCTGTGCCGTGAACACCTGCCCGAGGATGAAT
A_73_P139706	0.0277557	0.00357994	down	1.91834	-1.91834	-0.939862		LB0265.CR_I05 GC_BGC-26 Bos taurus cDNA clone IMAGE:8211535, mRNA sequence [DV884676]	TCTACAAGGTAGATTCTACTACTAACTGTGTTTTACAAGCTCAGAAAACAAGGAGGTTAA
A_73_P174052	0.00967688	0.000595984	down	1.91853	-1.91853	-0.940005		594403 MARC 6BOV Bos taurus cDNA 5', mRNA sequence [CB421387]	GTCAAAGTACAGAGTTGGAAGATGGCAAGTAACTTGGTGAGAATGGCTGCAAATCCTTGC
A_73_P052691|100335202	0.0398878	0.00632813	down	1.91857	-1.91857	-0.940031	OFD1Y	Bos taurus oral-facial-digital syndrome 1 Y-linked (OFD1Y), mRNA [NM_001281905]	TCTATTACATCTTTTTAAAATCAGTCCTGAATCCAGTCTCTACAAGTCACTGATTTCAGG
A_73_106229	0.00478322	0.000169192	down	1.91898	-1.91898	-0.940337		PREDICTED: Bos taurus RWD domain containing 2A (RWDD2A), transcript variant X1, mRNA [XM_005210693]	TATTTGGAAAGAATGCTCGTTATACATGCTTGTGTCTTTTTAAAGCTTACTAAATTAAAT
A_73_100099	0.0138835	0.00116305	down	1.91943	-1.91943	-0.940675		LB0162.CR_A14 GC_BGC-16 Bos taurus cDNA clone IMAGE:8119672, mRNA sequence [DT808905]	TTTCCCTTGTGGTTCAGATACTAAAGAATCTGTCTGTAGTGCAGGAGACCTGCGTTTGAT
A_73_P205327	0.0461383	0.00796063	down	1.92488	-1.92488	-0.944766		1406936 MARC 7BOV Bos taurus cDNA 5', mRNA sequence [DN548677]	ATTGCCTTTCACAAAAAGCAAATACTTGTCTAATACCACAGAAGGTCATTGATACGTGTA
A_73_P104136|100848801	0.0125063	0.000967456	down	1.92967	-1.92967	-0.948352	TRIQK	PREDICTED: Bos taurus triple QxxK/R motif containing (TRIQK), transcript variant X3, mRNA [XM_003583057]	TTAGTCTTCTCAGAGCCTGGCACAGTTTTTGCATGTGATATATGGTCAAAAATTATTTGT
A_73_P082856|785211	0.00386877	0.000105294	down	1.93286	-1.93286	-0.950735	WDCP	WD repeat and coiled coil containing [Source:HGNC Symbol;Acc:HGNC:26157] [ENSBTAT00000022591]	TCACAGCCACACAGGAAATAATCATAAGAGATGGCAGGTCAGATGACTTCCGAAACTCTG
A_73_P075141|788135	0.0271954	0.0034651	down	1.93639	-1.93639	-0.95337	FOXR1	forkhead box R1 [Source:HGNC Symbol;Acc:HGNC:29980] [ENSBTAT00000019450]	GAAAGGATCCAGCAGTGCATGAGCCAGCCAGATGTGATGTCCTCACTCTTTGACCTTTAG
A_73_P169752	0.0415328	0.00673402	down	1.93777	-1.93777	-0.9544		Rep: CWF19-like 2, cell cycle control - Danio rerio, partial (15%) [TC491222]	TGCTGTTTTCAGACTATTTTGGCCTTGCTACAAAGTCTCAGAGATATCTTTAACATTCCT
A_73_P096211	0.0284494	0.00372782	down	1.94265	-1.94265	-0.958023		Rep: WD repeat protein 5B. - Bos Taurus, partial (27%) [TC457840]	ATTGCGTCAGCAGCATTAGGAAATGACAAAACAGTTAAACTGTGGACAAGTACTTACTAA
A_73_P128501,A_73_101382|514621	0.0145946	0.00127668	down	1.95566	-1.95566	-0.967659	PFDN4	Bos taurus prefoldin subunit 4 (PFDN4), mRNA [NM_001038540]	TAGCAGATTTGAAAGTTCAGTTATATGCAAAATTCGGGAGTAACATAAACCTTGAAGCTG///GCATAACAGTTATATCAACTGTAGGGGCTTCATGTCATGTTATTAAAATCAGTTAAGCAG
A_73_105974,A_73_P272641|286816	0.00663616	0.000303302	down	1.97107	-1.97107	-0.978979	TNNT2	Bos taurus troponin T2, cardiac type (TNNT2), mRNA [NM_174771]	AACAGGATCAATGACAACCAGAAAGTCTCCAAGACTCGAGGGAAGGCCAAGGTCACGGGG///TGCAAGAGAAGTTCAAGCAGCAGAAATACGAGATCAATGTTCTCCGAAACAGGATCAATG
A_73_115621	0.030815	0.00420867	down	1.97167	-1.97167	-0.979421		GB	GCGCTTTGTAAAGAATATAACTTCCTGGAAAGAGATGAAACCAGGGTTTTATCATGGGCA
A_73_P048136|281235	0.0201347	0.00212028	down	1.98144	-1.98144	-0.986549	IDH1	Bos taurus isocitrate dehydrogenase (NADP(+)) 1, cytosolic (IDH1), mRNA [NM_181012]	TTACAGCCTTTTTCTTATGCATACAGTTATGCCACCTTTGTGAATGTGGCCGGGGACTTT
A_73_115832|281752	0.00460048	0.000150551	down	1.98749	-1.98749	-0.990946	CELA3B	Bos taurus chymotrypsin-like elastase family, member 3B (CELA3B), mRNA [NM_001166518]	AACCAAGGCCAAGGTGGCAGTGCCCATCCACACTCTTTGTGAAAAATAAAAGATCTCTCA
A_73_P074946	0.0219577	0.00244771	down	1.98965	-1.98965	-0.992514		LB02916.CR_O02 GC_BGC-29 Bos taurus cDNA clone IMAGE:8236252, mRNA sequence [DV919718]	AATCTGCTCGAGCAATTGTTTTTCAGATATCGGAATTCAGCAATGAATGACCTCCTCTGG
A_73_P064256|526435	0.0047025	0.000158905	down	1.99167	-1.99167	-0.993978	DLGAP1	Bos taurus DLG associated protein 1 (DLGAP1), mRNA [NM_001192629]	TCAGTTAAAGGCCAATAATTGGAAACAGATGGATCCTCTTGACAAGAAGGAGCGAAGGGC
A_73_P147846	0.0332181	0.00477221	down	1.9919	-1.9919	-0.994147			TTCTGACTTACAGTACAGTTTCAGGAAGTTGATAGATACTAAGAACTCATGATTGGTCTC
A_73_100049	0.00498029	0.000182128	down	1.99801	-1.99801	-0.998565		LB01922.CR_A18 GC_BGC-19 Bos taurus cDNA clone IMAGE:8117372, mRNA sequence [DV832181]	TTACAATCAAGCTTGGGTATGCTAATGCCAAGATTTACAAACTTGATGATGAAAGTTGTC
A_73_P130266	0.0495813	0.0089413	down	1.99998	-1.99998	-0.999986		bov_0B01-008-e03 Day 3 Oviduct bov Bos taurus cDNA 3', mRNA sequence [CK780128]	CAAAGTTCTTATTTTGGCAGCCTGGAAGAAAAGGTGCTTTGGAAATAAAAACTCAAAGGT
A_73_P495243	0.0209229	0.00227216	down	2.00074	-2.00074	-1.00053			TTCTGGAGCAATTGAAGGATCCCAGGAATACGAGAATGGAGACAACAACCCATTTACCCA
A_73_119242	0.0311019	0.00427517	down	2.00168	-2.00168	-1.00121		Rep: TACR2 protein - Bos taurus (Bovine), partial (5%) [TC432361]	TAGCCCAAGTCTCTTAGAGGATGGAAAATCCACTTTGGCATGTATACAGGCTAAAGCCAT
A_73_P100356	0.00785303	0.000409593	down	2.00973	-2.00973	-1.007		Rep: Iron transport permease protein - Staphylococcus aureus (strain bovine RF122), partial (5%) [TC436631]	CTTGCATAAGTCTAAGTCAGTGCCTGATAATACTCTGACCACTAACAGTCAATAAAAATA
A_73_P251796|509646	0.00557492	0.000217621	down	2.01111	-2.01111	-1.008	UBXN8	Bos taurus UBX domain protein 8 (UBXN8), mRNA [NM_001038672]	CCAGCTGACGTCATTTATCAGTTTCTTCTTTCAGCGTGCCTTGCCATAGTGAACATTTCA
A_73_107544|510995	0.0383539	0.00594713	down	2.01231	-2.01231	-1.00885	KIFC1	Bos taurus kinesin family member C1 (KIFC1), mRNA [NM_001101936]	CTACAGCTTTGTGGCAAGTTACGTAGAGATCTACAACGAGACTGTCCGAGACCTGCTGGC
A_73_P072626|786966	0.0103359	0.000676429	down	2.01547	-2.01547	-1.01112	LOC786966	plectin [Source:HGNC Symbol;Acc:HGNC:9069] [ENSBTAT00000015828]	ATGACATTGATGAGGCCATTGCCAAGAGCCTCATTGACCGCTCGGCACTGGACCAGTACC
A_73_P038586,A_73_P264771|529327	0.00595819	0.00024911	down	2.01567	-2.01567	-1.01126	RELL2	Bos taurus RELT like 2 (RELL2), mRNA [NM_001046303]	CAGGCTCTGGCTCGGGCTTTGTGCCCTTTATTCACTGTCAATAAATCCACTCAGACCATT///ATGAATGAGGACACAGTAGAGAGGATTGTTCGCTGCATCATCCAAAATGAAGCCAACGCT
A_73_P091676|525040	0.00379416	0.000101699	down	2.02387	-2.02387	-1.01712	IL17RA	interleukin 17 receptor A [Source:HGNC Symbol;Acc:HGNC:5985] [ENSBTAT00000014695]	TATGAGCTCATGGACCGGTTCGAGGAGGTCTACTTCCGCATCCAGGACCTGGAGATGTTC
A_73_111783	0.0047359	0.000163469	down	2.02671	-2.02671	-1.01914			CTTCTGCTGACTTCAAACATGCCAAAGAATTAAGAACAGATTGGGTGTCATTTCAGAATA
A_73_101038,A_73_P101011,A_73_P049126|280795	0.00326948	7.5027e-05	down	2.03575	-2.03575	-1.02556	FOS	Bos taurus Fos proto-oncogene, AP-1 transcription factor subunit (FOS), mRNA [NM_182786]	CCTTGAGGTCTTTTGACATGTGGAAAGTGAACTTGAATGAAAAATTTAAGCATTGTTTGC///TTTGCAGACAGAGATTGCCAATCTGCTGAAGGAGAAGGAAAAACTCGAGTTCATCCTAGC///AGACCTAGGGAGGACCTTATCTGTGCGTGAAACACACCAGGCTGTGGGCCTCAAGGACTT
A_73_P032061|517886	0.0468848	0.00817574	down	2.03635	-2.03635	-1.02598	DCLRE1C	Bos taurus DNA cross-link repair 1C (DCLRE1C), mRNA [NM_001100377]	GAATACTTAGAAATGATCCTATTACCTAAAAGGTGGCAGTAAAGAGGAAATGGATGACCG
A_73_P080386|100297513	0.0332181	0.00476395	down	2.04725	-2.04725	-1.03369	LOC100297513	PREDICTED: Bos taurus uncharacterized LOC100297513 (LOC100297513), mRNA [XM_002700656]	CTGCAAACAAGAACTCACAAATATGGACATTTCCTCTAGCGTCTTGAATATGGTTATATT
A_73_109366	0.0110917	0.000790919	down	2.04735	-2.04735	-1.03376		397663 MARC 4BOV Bos taurus cDNA 5', mRNA sequence [BI534595]	TCACTGGCGACATGGTGACATCAAAATGTGAAGCAGAAATAGGACTCTTTCTCACAGCAA
A_73_115554|280857	0.00413844	0.00012081	down	2.05186	-2.05186	-1.03693	MIA	Bos taurus melanoma inhibitory activity (MIA), mRNA [NM_173936]	TACTGCCAGTGAGCTCAGTCTATACTGTCATTGCTGTTGTTTCTCCCCGACTTTATGCAA
A_73_116488	0.015801	0.00145461	down	2.05216	-2.05216	-1.03714		Rep: Embryo-specific protein 3 - Arabidopsis thaliana (Mouse-ear cress), partial (5%) [TC455136]	TTTTTTATTTAAGAGAAAAGGAATGACCTCTTGAACGTACTCATTCCCCCAGGAAGTCCC
A_73_P056101,A_73_P398386|541114	0.00940264	0.000563803	down	2.06257	-2.06257	-1.04445	RAB39A	Bos taurus RAB39A, member RAS oncogene family (RAB39A), mRNA [NM_001192830]	TTTGTTCCAAATACTGTGCATTCTTCTGAGGAAGCAGTAAAGCCCAGGAAAGAGTGCTTC///TTGAGGAATCCTTCACTATCTTGACAAGAGACATATATGAACTTATTAAAAGGGGAGAGA
A_73_115745	0.00718371	0.000351368	down	2.06606	-2.06606	-1.04688		Rep: PAOX protein - Bos taurus (Bovine), partial (9%) [TC444581]	AACCTGAACCCTAGGATTACTTCACCTAATTTCTCCTTCATACATTGACTTACTCATTCA
A_73_108695	0.0153476	0.00138064	down	2.06804	-2.06804	-1.04826		PREDICTED: Bos taurus ADAM metallopeptidase with thrombospondin type 1 motif 6 (ADAMTS6), transcript variant X1, mRNA [XM_010816725]	CTTGTAATGAAAATGAAAAAGTCATTGTAACACTTGATGGAGTGAAATTCCACACCAGGC
A_73_115705	0.0142621	0.00122387	down	2.07363	-2.07363	-1.05216		Rep: Methyltransferase-like protein 7B precursor - Homo sapiens (Human), complete [TC451578]	CAAGACTCAGCATAAAAGACAGAGGTTTTGTCCTCAAAATTTTTTAATAAATAGACAAAA
A_73_P312716	0.0110917	0.000791111	down	2.08625	-2.08625	-1.06091			TTCCCAACAAATTGGAGTTTGTCCAGGAAGTCTCTGAGATTCTCATGGCATTTGGCATTC
A_73_P166272	0.034773	0.00511173	down	2.08885	-2.08885	-1.06271		LB03427.C21_A23 GC_BGC-34 Bos taurus cDNA clone IMAGE:8663521 3', mRNA sequence [EV736054]	CTGGTCTTGGAACCATGCTAAGGAGTTCAGGATCCATTCCATATACATCAACAAACTGCC
A_73_110639|533820	0.0298249	0.0040017	down	2.08887	-2.08887	-1.06272	MEGF9	multiple EGF like domains 9 [Source:HGNC Symbol;Acc:HGNC:3234] [ENSBTAT00000043692]	AAAGAAGACAATATCAGTTTCAGCAGCTACCACGACAGCATTCCCAACGCAGATGTGTCA
A_73_P406921	0.00962742	0.000589996	down	2.10937	-2.10937	-1.07681		neuron navigator 1 [Source:HGNC Symbol;Acc:HGNC:15989] [ENSBTAT00000029223]	TAATCAACCAGTAAAAATGACACCCAATCACGGCTTGCACCTAAGCTTCAGGATGCTGAC
A_73_104996	0.0432564	0.00720686	down	2.11115	-2.11115	-1.07803			ACTTGAGTAAAATCTAAGGAAATCTGAATTAAGCATAGGCTTTAGTTAATAACCCACTGG
A_73_117241,A_73_P121081|614805	0.0265357	0.00334863	down	2.11342	-2.11342	-1.07958	C10H15orf48	Bos taurus chromosome 10 open reading frame, human C15orf48 (C10H15orf48), mRNA [NM_001206976]///C0009283K07.Q1KM13R KN510 M. bovis infected Bos taurus DC [FE005992]	TAAAGGTAGCACAGCATAACCACATAGTCCCAAAATAAGACTCTGTGTTGTTTTGTGTAT///TCAGGAGTTGGAAAAAGCCCATGATGACTTAAGAGTAGAATCCAAATCTGGGGGATCCAG
A_73_112437	0.0351691	0.00519278	down	2.11662	-2.11662	-1.08176		Wnt family member 7B [Source:HGNC Symbol;Acc:HGNC:12787] [ENSBTAT00000012540]	CTTCCTGCGCATCAAGCAGCTGCGCAGCTACCAGAAGCCCATGGAGACGGACCTGGTGTA
A_73_111997|101904292	0.00618334	0.000263955	down	2.12152	-2.12152	-1.0851	OVOL3	Bos taurus ovo like zinc finger 3 (OVOL3), mRNA [NM_001302760]	AAAGCATTTACGCAGCGGTGCTCACTTGAAGCACACCTCGCCAAGGTGCACGGGCAGCCG
A_73_P064271	0.0248412	0.00302002	down	2.13396	-2.13396	-1.09353		laminin subunit alpha 1 [Source:HGNC Symbol;Acc:HGNC:6481] [ENSBTAT00000024169]	AGATTGTAGATGGAAAGCTCTTGTTTCACGTTAACAATGGTGCTGGGAGGATAACGGCCA
A_73_P099546,A_73_103763|3283879	0.0378702	0.00582585	down	2.1365	-2.1365	-1.09525	COX1	cytochrome c oxidase subunit I (mitochondrion) [Source:RefSeq peptide;Acc:YP_209207] [ENSBTAT00000060569]	TCGGATATATGGGAATAGTTGGGCTATAATGTCAATCGGATTTCTAGGTTTCATCGTATG///TGATTAAACGGATGCCCTCCACCATATCACACATTTGAAGAACCCACCTATGTTAACCTA
A_73_P452156,A_73_P330427,A_73_P068876,A_73_109402|538517	0.00706171	0.000337952	down	2.13706	-2.13706	-1.09563	ARRDC4	Bos taurus arrestin domain containing 4 (ARRDC4), mRNA [NM_001192034]///HW_Fat_5_B07 Bos taurus CF-24-HW fat cDNA library Bos taurus cDNA, mRNA sequence [DV776825]	TTCCATACAATGGTTTTGGCAGCAGAAACTCCAGCGTTGCCAGCCAGTTCATTATGGATA///TATTGAAAACTCAAGAGAAAATGGTTGGCTGTTGGTTTTTCACTTCTGGTCCAGTCTCGC///AAAGTCTCAGAATGTACTGAAAGTCCAGATGGTGATAGAGTAAGTTGAAGGGGTGCCTGT///TTGTATTTTGTACTCTTGTCTGAACCCCATGGGTTCCTTTTGTTAATAAAATGATTCCTC
A_73_109151	0.0204815	0.00218735	down	2.13847	-2.13847	-1.09658			TTCAGTAGAATGGCTAATACTGTAAAAGAAAAACTGTCACAGTTTATAGCCATAGGAACC
A_73_P059671|536490	0.0161062	0.00149931	down	2.14451	-2.14451	-1.10065	LRP2BP	LRP2 binding protein [Source:HGNC Symbol;Acc:HGNC:25434] [ENSBTAT00000006705]	GGTAGGTTAAGATACAGTGTGATCTAGGCGTTTGATGAATAAACTAGGAATTGGATTTTT
A_73_109683	0.0200017	0.00209716	down	2.14917	-2.14917	-1.10378		GB	AAGCAAAAGAATTTGCAGGAGGTATTTATTCCAGGCTTGAAGCACAAATCAAGGCCTCAG
A_73_P280046,A_73_106396,A_73_P061361|508924	0.00651307	0.000289816	down	2.15761	-2.15761	-1.10944	BEST1	Bos taurus bestrophin 1 (BEST1), mRNA [NM_001080245]///PREDICTED: Bos taurus bestrophin 1 (BEST1), transcript variant X1, mRNA [XM_015461234]	CTCCCGCTTGCTGCTGTGCTGGCGAGGCACCATCTAACAAACTGCTCTATGGCGAGTTTT///AGAATCAGGAGTCCTTAAGTTCTGTGAATTGAATACACTCAAGCCTTGATACCCTTCCCA///CTCAAAGATCATGGAGATCCTTACTGGGACTTGGAAAACAGGGATGAAGCACATTCCTAG
A_73_109254	0.00753012	0.000384776	down	2.17282	-2.17282	-1.11957		Rep: Wwp1 protein - Mus musculus (Mouse), partial (16%) [TC436685]	TATGTTCTACGTTTTTATTCAGAATTCATAGTAAAGATGAAATAAAAGTCCGTGATCCAC
A_73_P087456	0.0189929	0.00193483	down	2.20138	-2.20138	-1.13841		Hw_Fat_41_050806_H08 Bos taurus CF-24-HW fat cDNA library Bos taurus cDNA, mRNA sequence [DV776311]	CCCAGTAGAAACAGATATTCTGAAAGAGGACTTAGACAATCATTCTGAAAATGCTTTACA
A_73_P054746	0.00524344	0.000198005	down	2.20478	-2.20478	-1.14064			AAGCATCTAGAAGGATTACCTCCTGAAATGAGAGTTTTTATTCAGGTATCACTGGAACCC
A_73_115894	0.0153162	0.00137723	down	2.21182	-2.21182	-1.14523		Rep: Endonuclease/reverse transcriptase - Pan troglodytes (Chimpanzee), partial (3%) [TC480683]	AATTGATTTTTATGCCAAGTGACAAAGACTCAGAAAATTACTTGATATCCCCTTCCTCAC
A_73_P141551	0.00913339	0.00053496	down	2.21709	-2.21709	-1.14866		coiled-coil domain containing 173 [Source:HGNC Symbol;Acc:HGNC:25064] [ENSBTAT00000046952]	TGAAGATTTGATTATTGCTAGAGATATTGCAGAAGCTGAGGCTGAGTGGGAAAAAAGAGA
A_73_P434086	0.0326957	0.00463532	down	2.23425	-2.23425	-1.15979		Rep: Sensor protein - Roseobacter sp. MED193, partial (3%) [TC411095]	GTAGACAATGCCTAGAACATGACTGAAACTTTGGGCCATACTTTACAGATGCAAAGAATG
A_73_P419656	0.00289799	5.89288e-05	down	2.25154	-2.25154	-1.17091			GAAACTGGAGTGTCTACATAATTGCCTTCATTCTCATTTTGTTAGCATATAACTGACCAT
A_73_P148286	0.00310204	6.60915e-05	down	2.25405	-2.25405	-1.17252		1270723 MARC 7BOV Bos taurus cDNA 5', mRNA sequence [DN526009]	TGCCTATTTGTATATAGGCACTTTGATCACACAGCACCTTTTACTTGTCTGAATATTAGT
A_73_P070576	0.0123596	0.00094682	down	2.25405	-2.25405	-1.17252		LB004151.CR_P13 GC_BGC-04 Bos taurus cDNA clone IMAGE:9063615 5', mRNA sequence [EV609859]	TATACCATGACTCGTTTAGCAGTAGATGGAGCTGATATTTATATTGTGGAGCATGGCTGT
A_73_107430	0.0317396	0.00440777	down	2.26248	-2.26248	-1.1779		Rep: Vacuolar ATP synthase catalytic subunit A - Bos taurus (Bovine), complete [TC401634]	ATTTTGAAAGGCCAATTAATTAAGATCCAATGTAGCATGTTCACAGGGCATTTTACTTCC
A_73_115619|507522	0.00711797	0.000343811	down	2.27199	-2.27199	-1.18396	NPHP3	Bos taurus nephrocystin 3 (NPHP3), mRNA [NM_001192152]	TCATCAAGGACAAAGGTGATAGCAGCAATTACCACTCACTGGAAATGCACCTTAGGATAA
A_73_114677	0.0041241	0.000119909	down	2.27827	-2.27827	-1.18794		Rep: IKAROS family zinc finger 2 - Bos taurus (Bovine), partial (13%) [TC459068]	TTTCTGGAATTTGGGGATTGGACCCCAGAACCAAACATGCTGGTACCGTCTACAAATAAA
A_73_P083351	0.00922485	0.000544533	down	2.29163	-2.29163	-1.19637		torsin family 1 member B [Source:HGNC Symbol;Acc:HGNC:11995] [ENSBTAT00000003678]	TTCATATTTGATGAGATGGATAAGTTGCACCCGGGAGTCATTGACGCAATCAAGCCGTTC
A_73_P108131	0.00195968	2.87292e-05	down	2.33094	-2.33094	-1.22091		Rep: Xenopus laevis tandemly arranged embryonic U1 snRNA genes U1a/U1b - Xenopus laevis (African clawed frog), partial (28%) [TC482217]	TGTGGGAAACTCGACTGCATAATTTGTGGTAGTGGGGGACTGCGTTCGCGCTTTCCCCTG
A_73_P034446|617724	0.0410531	0.0066149	down	2.33972	-2.33972	-1.22634	C14H8orf46	Bos taurus chromosome 14 open reading frame, human C8orf46 (C14H8orf46), mRNA [NM_001076475]	CCTCTATTTGTATGTGGCAGCTGGAGATATATGTAGGATGGAGCTTATTTATTTTTCATT
A_73_120343|515988	0.000720997	3.14877e-06	down	2.34221	-2.34221	-1.22787	STAT4	Bos taurus signal transducer and activator of transcription 4 (STAT4), mRNA [NM_001083692]	ATTCTAGAGACCCAAGCTTCTGATAAACTTGTGAGATAAAACACTTTAAGAAACCAGTGT
A_73_P087301	0.0209229	0.00227051	down	2.34325	-2.34325	-1.22851		solute carrier family 9 member B1 [Source:HGNC Symbol;Acc:HGNC:24244] [ENSBTAT00000027774]	CTGGGACCTAAAGTACTCACTCGCTATGATAAAAGCAAAGTGAAAATGGAGTTATCAGGA
A_73_P468273,A_73_P189132,A_73_P046446|526888	0.0031924	7.04137e-05	down	2.35871	-2.35871	-1.238	EPM2A	Bos taurus EPM2A, laforin glucan phosphatase (EPM2A), mRNA [NM_001099709]	TCTCTGTTATAGAGATGAGGAAACTAAGATTCACAGAGATGAAATCAACTGTCCTCAGTC///AATTTCCAGACGGAATGGGATATTGTACAGAATTCCTCAGGCTGTAACCGCTACCCAGAA///CCATCCTCAATGAATGGGATGTCCAATGTATTTAAAAATCACCTGGAACTTTTGCTAAAT
A_73_112860,A_73_P049206,A_73_P116396|281658	0.0492057	0.00882095	down	2.36585	-2.36585	-1.24236	S100G	Bos taurus S100 calcium binding protein G (S100G), mRNA [NM_174257]///BP109804 ORCS bovine utero-placenta cDNA Bos taurus cDNA clone ORCS13679 3', mRNA sequence [BP109804]	CACCAATGTCACCACTTAATTCTTGACAATTGTAATGATCCAACACTGAGGTCTAATTAC///GGGAAATTCTTTCGAAACTAAACTTTCTCCAATCTTCCAATATTCTTGGTCTTAAGGTTC
A_73_103031,A_73_P255661|535222	0.022311	0.00252705	down	2.38797	-2.38797	-1.25579	EFEMP2	Bos taurus EGF containing fibulin like extracellular matrix protein 2 (EFEMP2), mRNA [NM_001076049]	ATCCTAGCAGCTCTCTGAGTCTCAGTGTTCCAATCCATAAAATGAGGCCACTGGATTGTT///TTCAGATCCGTGCTGGAAACTCGCAGGGAGACTTCTACATTAGGCAAATCAACAATGTCA
A_73_107648|617047	0.0143029	0.00123314	down	2.4205	-2.4205	-1.27531	C27H8orf4	Bos taurus chromosome 27 open reading frame, human C8orf4 (C27H8orf4), mRNA [NM_001035490]	CAGTTACTGCAGTAAGCATTAGGAAGCGAATATGAGACACTTAATAGTTTATAAAGATGC
A_73_P058271|515570	0.0107209	0.000726439	down	2.45907	-2.45907	-1.29811	LOC515570		ACCACTGACAAAATGATGGATGTGACAGTGACAATCAAGTCTTCCATTGACAGCGAGCCT
A_73_P392146	0.00333261	7.88934e-05	down	2.51254	-2.51254	-1.32915		coiled-coil domain containing 15 [Source:HGNC Symbol;Acc:HGNC:25798] [ENSBTAT00000005208]	TGCAGAGAAAGAAGGCTCTATAGCCATGTACTCTTCAGATCCAGCACACTTAACTCCTAA
A_73_P420461,A_73_106053,A_73_P402096|516087	0.0193713	0.00200658	down	2.54081	-2.54081	-1.34529	SCARA5	Bos taurus scavenger receptor class A member 5 (SCARA5), mRNA [NM_001102499]	TGCTGGTCTTTCTGATTCTCGTGGGCATCTTCATCTTAGCAGTGTCCAGGCCCCGGAGCT///TTCAGGGACTAAGGGAAATTAGGCCAGGCCTAAAATACATTAGACCTTTTGTAAGAATTT///GACCTCTGTAATTCCCATCCCAGGACCACGGTGACCTGTCACCCTCCTCCTCTTGGACAT
A_73_P161142	0.0166699	0.0015938	down	2.67414	-2.67414	-1.41907		Rep: Nucleosome-binding protein 1 - Homo sapiens (Human), partial (18%) [TC418218]	TCTCCAGAAGTTTTTCATCTTGCAAATGTGAATCTATACCCAAGAGCAATTTCTTTCCAT
A_73_P178192	0.0138513	0.0011556	down	2.85923	-2.85923	-1.51562		UMC-bend_0A02-021-b06 Day 0 Oviduct post-LH surge bend Bos taurus cDNA 3', mRNA sequence [CN999697]	AAGTGAACTTGAAAGGATTGCACTTATAATTAAATGGGACATAGCCGGGTATAAAGAGGA
A_73_115628	0.00747387	0.00037742	down	2.9093	-2.9093	-1.54067		Rep: Coiled-coil domain-containing protein C6orf185 - Homo sapiens (Human), partial (82%) [TC433804]	AGCTTTTCAAGTTTAAACGGCTCCATCCAGAACCCCATTTAGACCTGATTGGTAATCATA
A_73_100485	0.0297425	0.00398542	down	3.47731	-3.47731	-1.79797		Rep: Tumor necrosis factor receptor superfamily member 17 (B-cell maturation protein) (CD269 antigen). - Canis familiaris, partial (51%) [TC481301]	TGTTGGGAGCTTAACTCTGGAAACTTCCTTGGTTTCATGATTAAATTGACTCACTGAAAA
