# Supplementary material for: Transcriptomic Analysis of MDBK Cells Infected with Cytopathic and Non-Cytopathic Strains of Bovine Viral Diarrhea Virus (BVDV)
Source: Viruses. 2022 Jun 11;14(6):1276. doi: 10.3390/v14061276 (PMC9228727; doi:10.3390/v14061276)
Supplement: Supplementary file 1 [file viruses-14-01276-s001.zip › Table S5_Differentially expressed entities 72h p.i. with ncp.xlsx]

## Sheet: Arkusz1
Gene_ID	p (Corr) ( [3] )	p ( [3] )	Regulation	FC (abs)	FC	Log FC	GeneSymbol	Description	Sequence
A_73_P103746,A_73_121270,A_73_P117406|404070	0.00523018	2.24915e-05	up	8.17788	8.17788	3.03173	MT2A	Bos taurus metallothionein 2A (MT2A), mRNA [NM_001075140]///Hw_loin_23_050701_B04 Bos taurus CF-24-HW loin cDNA library Bos taurus cDNA, mRNA sequence [DV797790]	GCGGGGAGAGCCTGCTCCCCGGTGTAAATAGAACAACGTGTACAAACCTGCATATTTTTT///CCTGAAGGCGGGGAGAGCCTGCTCCCCGGTGTAAATAGAACAACGTGTACAAACCTGCAT///GGATTGAAAAATGTTCTTAAACGCTTTTCCGCGAAACACCACAATCCCTTCCCCCTTTAA
A_73_P040981|404071	0.00508753	2.1131e-05	up	5.9921	5.9921	2.58306	MT1A	Bos taurus metallothionein-1A (MT1A), mRNA [NM_001040492]	GCCCTGTGGGCTGTGCCAAGTGTGCCCAGGGCTGTGTCTGCAAAGGGGCCTCGGACAAGT
A_73_117821,A_73_P268996|533630	0.00409472	6.72344e-06	up	4.5031	4.5031	2.17092	PSPH	Bos taurus phosphoserine phosphatase (PSPH), mRNA [NM_001046355]	AAGAAGAAGGAATTGATGAGCTGGCCAAATTCTGTGGAGTTGAGGATGCCGTGTCAGAAA///ACACCTTCACTATTGGGAATGTGGATTAGGCAGCTTTAAATGAAATTGGTTTTCCCTTTA
A_73_P086136|507688	0.00971571	0.000163335	up	4.50113	4.50113	2.17029	GLDC	Bos taurus glycine decarboxylase (GLDC), mRNA [NM_001192951]	CACTGAAGAAATCTTTTTCCTCCTCCTAATTTACTCAATCTGTAATAGCATTTCTGAGTG
A_73_P030711,A_73_P248641|768319	0.00900926	0.000132554	up	4.47386	4.47386	2.16152	MT1E	Bos taurus metallothionein 1E (MT1E), mRNA [NM_001078134]///LB0041.CR_D11 GC_BGC-04 Bos taurus cDNA clone IMAGE:7961629, mRNA sequence [DT829120]	GTCTCTTACTACCTTGATGCGATACGACATTCCTTTTTCTATGAAATATGTGAATTGCAA///AGACTCTAATTTTGAATGGAGAGTACTGAGGCTCCAGACTATCCTTGTTGTCCTCAGCCA
A_73_107738,A_73_P425526,A_73_P333276,A_73_P452126,A_73_105268,A_73_P055396|282358	0.00428729	1.14358e-05	up	3.77904	3.77904	1.91802	SLC2A3	Bos taurus solute carrier family 2 member 3 (SLC2A3), mRNA [NM_174603]	AAATGGAAAAGCCTTAGTGCATTGCCTTGCATACTTAATAAATTATGTTGCTTGCGTTCA///GCATGGAATTTTTTCCAGTTCTCAGTGACCAGGTTGTGAATAATTTCCAAATGGATTTTT///GAAAGTCCTAGATTCTTGCTCATTAACAGAAAGGAGGAGGAGAAGGCAAAGGAGATCCTC///ATTGGAGGATGCATGATGTGGTGTATGAAGTTTGCACGTTGCCTCTTAACATTTCTATCC///CGCTCAGAGGATCCCAAGGCTGGGGTTAGTCGTTGTGTTCAATGGCTTTTAAAAATTCAT///TTCAAAGTTCCTGAGACCCGTGGCAGGACTTTTGAGGAAATTACACAAGTCTTTGAAGGA
A_73_100504	0.0394717	0.00275097	up	3.67747	3.67747	1.87872		Rep: Chromosome undetermined scaffold_140, whole genome shotgun sequence - Paramecium tetraurelia, partial (6%) [TC425668]	GAAACATCTGGGCTTTATTCTTCAAGCGTTGGAGGTTGATGTGTCCTGTCAAGGGGTAAA
A_73_P395506,A_73_P049851|784362	0.00542407	3.16119e-05	up	3.61539	3.61539	1.85415	SCEL	Bos taurus sciellin (SCEL), mRNA [NM_001102332]	CCTGGACAGTCTTATTAAAGTGACTCCCTCAGCAAAGAAAAGCAGTGAACAAGGTCTTGA///GTTCTTTAGCATGCTGTACCTATTCCTACTACATAGCATTTTATATTTACAGATGGCTTG
A_73_P039976|505103	0.00908433	0.00014127	up	3.5412	3.5412	1.82424	PHGDH	Bos taurus phosphoglycerate dehydrogenase (PHGDH), mRNA [NM_001035017]	TGCTTGTGTCTCCTCTGACTCCTATCTTTCTGTGGTACAGCAATCACCTCCCAATAAAGA
A_73_107068|785576	0.0215145	0.000840094	up	3.52442	3.52442	1.81739	FGF21	fibroblast growth factor 21 [Source:HGNC Symbol;Acc:HGNC:3678] [ENSBTAT00000015438]	CTTTCGGGAGCTGCTTCTTGAAGATGGATACAACGTCTACCAGTCGGAGACCCTGGGCCT
A_73_P034726,A_73_P306106,A_73_P365636|538465	0.0118098	0.000233108	up	3.43567	3.43567	1.78059	TRIB3	Bos taurus tribbles pseudokinase 3 (TRIB3), mRNA [NM_001076103]	TGGAAAGTCTCAGGTTCAGGACCCTACATTAACACTATGGGTTTATATGCCATGAGTGTG///AGTGCAAAACATGAGGCTGGTCCTCATCTTACTGAAAAGAGTAATTTGGAGTGAGGGCCT///TGGAGCTGGATGATGACCTAGACACTGAGTGTCCCAGCCAGAAACAAGCTCGAAGTGGGC
A_73_115733|517539	0.00816443	0.000104221	up	3.40093	3.40093	1.76593	MTHFD2	Bos taurus methylenetetrahydrofolate dehydrogenase (NADP+ dependent) 2, methenyltetrahydrofolate cyclohydrolase (MTHFD2), mRNA [NM_001075755]	AAGATCCCATAACTGCTAAACCCAAGTTGGTTGGAGATGTGGATTTTGAAGGAGTCAAGA
A_73_107306|540051	0.0142243	0.000351209	up	3.34496	3.34496	1.74199	ACTL9	Bos taurus actin like 9 (ACTL9), mRNA [NM_001038569]	GTCCTGCGGGAGCAATATGAGGAACAGGGGCCCTACATCGTGTACCGCAAATGCTACTGA
A_73_P149431	0.0114855	0.000220579	up	3.26982	3.26982	1.70921		PREDICTED: Bos taurus glycoprotein Ib (platelet), alpha polypeptide (GP1BA), mRNA [XM_581184]	GGGGTGGTTTTCTGTTCTTTCCCTCTGTTTACCATTTTCTAGTTTTCCACCATCGTAATG
A_73_110222|517587	0.0276326	0.00139956	up	3.25931	3.25931	1.70457	INHBE	Bos taurus inhibin beta E subunit (INHBE), mRNA [NM_001205842]	TCTACCTTGACCGTGATGGCAACGTGGTCAAGACAGATGTGCCGGATATGGTGGTAGAGG
A_73_P205932	0.0115364	0.000222437	up	3.18939	3.18939	1.67328		Rep: Prostaglandin F synthase-like1 protein. - Bos Taurus, partial (62%) [TC462112]	GGCTTTTCTTATGATTTTCCTGTAGAAATGTGTGTGTGTGTTTTCACTTACAAAGGGAAA
A_73_P120686	0.0248672	0.00111149	up	3.05702	3.05702	1.61212		962699 MARC 2BOV Bos taurus cDNA 3', mRNA sequence [CK773992]	TGTGCCCCCGCAAAGTTACACAGTTTTTTGCATGTGTCTCTGTATGTATATGTGTTACAT
A_73_P206192,A_73_P042781|535379	0.0455489	0.00354943	up	3.02361	3.02361	1.59627	ABCA1	Bos taurus ATP binding cassette subfamily A member 1 (ABCA1), mRNA [NM_001024693]	TTATGACTGAGGTGAATAAGACCTTCCAGGAACTGGCTGTGTTTCATGATCTAGAAGGCA///GACGTTGCAGTCCTCACATCTTTCCTGCAGGATGAGAAAGTGAAAGAAAGTTATGTATGA
A_73_P194217,A_73_106037,A_73_P072456|522265	0.0257877	0.00122729	up	3.00404	3.00404	1.5869	SLC30A1	Bos taurus solute carrier family 30 member 1 (SLC30A1), mRNA [NM_001205893]	GAGCCATTGACTTGAGAGAAAAATCTGAAGGTTAATGCAGTTTGGATATTAAACTGTCAA///CAACTTTGTGGTTATTAGAGCAGAGTACAGCTATGCTGTAACAGTTTTGGAAAGCCAGTT///AAGCAGCCCAAGAGGACTAAAGTTGAAAACATCCCTGCTGTTGTGATAGAGATTAAAAAA
A_73_P044296,A_73_120451|539159	0.0158666	0.00043566	up	2.99749	2.99749	1.58376	CTH	Bos taurus cystathionine gamma-lyase (CTH), mRNA [NM_001024567]	CTACTGGATGATCTAGATCAAGCTTTGAAGGCAGCTAACCCTCCAAATGCAAGTTCCAAC///CAGGTCAATTCTGTTCAGATCTTTTTATTAATTTTGATATACATGTGCCTCTGAAGGAGG
A_73_120394	0.0252183	0.00115122	up	2.96782	2.96782	1.5694		olfactory receptor family 10 subfamily J member 1 [Source:HGNC Symbol;Acc:HGNC:8175] [ENSBTAT00000064894]	TGACTTTGATCATCAGTGTTTTCGTGCTCGTTGTGCCTATGGGTCTGGTCTTCATCTCTT
A_73_113289	0.0279044	0.00142377	up	2.94424	2.94424	1.5579		Rep: Reverse transcriptase-like - Bos taurus (Bovine), partial (7%) [TC467198]	ACTCCCTGTATGATCAGAGCCCCGCCTCATTATATTATTGTTCTTAACTCTTGTCTCCAT
A_73_101979	0.00568592	3.66163e-05	up	2.9424	2.9424	1.55699		Rep: Reverse transcriptase-like - Bos taurus (Bovine), partial (16%) [TC443361]	GCATATATAAAGGAAGCTTTTTTCCCTCCCCTGAAATAGTTCCTGGCATGTGGTAGGCAC
A_73_P081071	0.00900926	0.000130678	up	2.93718	2.93718	1.55443		Hw_loin_14_050628_F04 Bos taurus CF-24-HW loin cDNA library Bos taurus cDNA, mRNA sequence [DV795077]	CTGGGTGTGGGTGCTTGTATTTTTCTATTTCCAGTCACTTTAAGGTTGTTCACAAACTAA
A_73_107639|531488	0.0455928	0.00356675	up	2.89752	2.89752	1.53482	WASF1	Bos taurus WAS protein family member 1 (WASF1), mRNA [NM_001034017]	GTGGTGCTTGTTCTTTGAAAATGTTTGGTCATTCCAGTGTTTTGCTTTCTTTTCCTTAAG
A_73_P350516,A_73_P389096,A_73_P040976|282369	0.0187653	0.000632111	up	2.8917	2.8917	1.53192	SLC7A5	Bos taurus solute carrier family 7 member 5 (SLC7A5), mRNA [NM_174613]	TTTGAGACTGTTGGGGCCTCAGTTTTCTTGGGTGTACATGGGGCACTGCCCTCTGCCTCT///TTATCATCTCGCTCCCGATCGTCACCCTGGTGTACGTGCTGACGAACCTGGCCTACTTCA///GCTTTGGGATGGGGAGTTTTGTGTTTTGTTGGGGTAATTTGTTTTTTAAGAATTGGAATT
A_73_114229|514876	0.00606526	4.76106e-05	up	2.88848	2.88848	1.53031	CALCB	Bos taurus calcitonin related polypeptide beta (CALCB), mRNA [NM_001143737]	AAAGTTGTCATGGCAGAACCCTCCAATTCTTGCTTCATCCCTCATGCCTCGTCATTGATT
A_73_100890,A_73_115302|531476	0.00542407	3.15906e-05	up	2.88723	2.88723	1.52969	JDP2	Bos taurus Jun dimerization protein 2 (JDP2), mRNA [NM_001193245]	GACCGACAGCGTCAAGACACCTGAGTCAGAAGGCAACCCTCTGCTTGAGCAGCTTGAGAA///GGGAGGGGGTGGGGTGTGTTTCCATCCTGGTAAACCCTTCATAGTACTCAGTCCTGTATC
A_73_P095176|539153	0.0345618	0.00214652	up	2.86547	2.86547	1.51877	SLC16A14	Bos taurus solute carrier family 16 member 14 (SLC16A14), mRNA [NM_001192187]	TAATCGGATGTTTGTCGCCTTTATTTTCTGGGCTCTGTTTGCCTACAGCAGCTTCGTCAT
A_73_P084276|101902412	0.0337346	0.00204518	up	2.76687	2.76687	1.46825	ANGPTL8	angiopoietin like 8 [Source:HGNC Symbol;Acc:HGNC:24933] [ENSBTAT00000045880]	ATGGTTGAGGAAGGCTGTAGGAAGGATATGCCCCTTCATGCCTACACATTCCCTATTAAA
A_73_114033,A_73_P103726|514368	0.0218055	0.000859003	up	2.76484	2.76484	1.4672	ATP6V1G2	Bos taurus ATPase H+ transporting V1 subunit G2 (ATP6V1G2), mRNA [NM_001075664]	GTGATGTTGTGTCCTCTTGTGTGCATGACCTTCCTTTTACATCCTCAACACCATACGTTC///TGACCTTCCTTTTACATCCTCAACACCATACGTTCCCTTTGTAACAATAAAAGTGTCAAT
A_73_114671	0.00506393	2.02611e-05	up	2.74063	2.74063	1.45451		Rep: Heavy-chain fibroin - Galleria mellonella (Wax moth), partial (6%) [TC454898]	TGCCCCTCGCGGGACCACTGCTGTTGTTGCTGGTGTCCCCTTGTGATATGCAGGTTTTAT
A_73_P066551|100302388	0.0169303	0.000509442	up	2.73873	2.73873	1.45351	SMIM5	Bos taurus small integral membrane protein 5 (SMIM5), mRNA [NM_001163000]	AGAAAACCATCAGGGATTCTTTGCCGACCTGCACTTTTTAACAAAGCACAGAGCGTAGTC
A_73_107978|107131158	0.0081466	0.000103683	up	2.73753	2.73753	1.45287	LOC107131158	olfactory receptor family 1 subfamily N member 1 [Source:HGNC Symbol;Acc:HGNC:8221] [ENSBTAT00000053513]	GTGCTCATGGTCCCCTTCATATGCATTGTCATCTCCTACATTCACATTGTATCTGCCGTT
A_73_105774	0.0119913	0.00024378	up	2.73081	2.73081	1.44933		HW_Fat_67_050831_B03 Bos taurus CF-24-HW fat cDNA library Bos taurus cDNA, mRNA sequence [DV776802]	GACTGCTAGTGGACTCGGTATTTGTGTGTGTGTGTGTTTTCACTTAAAATGGCTGTCTCA
A_73_102040,A_73_P100681|513497	0.0203239	0.00073108	up	2.68361	2.68361	1.42418	CDKN1A	Bos taurus cyclin dependent kinase inhibitor 1A (CDKN1A), mRNA [NM_001098958]	TTCAAAGCCCCACCCACAGTGCTGAGTATACAGCAGGTGCTCAATAAATATTCCTGATGA///TGCACCCTCGTGACTCGCTCCCCCGAGCGGCCCGAGGGGACCCCCGGTGGGCCTGGCGCC
A_73_101175	0.00900926	0.000135884	up	2.67004	2.67004	1.41686		PREDICTED: Bos taurus calcium [XM_003585435]	CGTTTTGTCCTTCAGCAAGGAAGGCGGAAGCATGATGTGCACTATATTGTGGTTCTGTTT
A_73_105589|511504	0.014903	0.000384457	up	2.65692	2.65692	1.40975	CAMK1G	Bos taurus calcium/calmodulin dependent protein kinase IG (CAMK1G), mRNA [NM_001076836]	TGTTTTCTTGTCCTCCGCCCCCTCCGGCTTCCTGCTCTGTGTTGTGCTGAATAAAATGGA
A_73_119032	0.0152746	0.000402192	up	2.64561	2.64561	1.4036		Rep: UPF0513 membrane protein - Bos taurus (Bovine), partial (55%) [TC431618]	TGTGTGTGGCAGAGTCTCTGTGTGTGTCCAACATACTCCACGCTGTGGAGTCCTCCTGGA
A_73_P409606,A_73_P041301|514209	0.0492967	0.00419544	up	2.62384	2.62384	1.39168	ASNS	Bos taurus asparagine synthetase (glutamine-hydrolyzing) (ASNS), mRNA [NM_001075653]	TTTGACAATGCCGTTAAGAAACGTTTGATGACCGACAGAAAGATTGGCTGCCTTTTATCA///TAGGATTTTACAGGACTATATTGAACATCAGGTTGATGATGCAGCGATGGCAAGCGCAGC
A_73_P066991,A_73_106102|282363	0.0179431	0.000566283	up	2.62124	2.62124	1.39025	SLC6A2	GB///Bos taurus solute carrier family 6 member 2 (SLC6A2), mRNA [NM_174608]	GCAGAGTTCTCTGTCTGTAAAAGCAAGGGTTGAATCAGAGAATTGAAGGTCTCACCCAGT///GGTTTCTTATACTCTCGGAAATCTAGATTTGTGGGTTCTTGTTCTGACTGTGAGAGGCCC
A_73_108250,A_73_P081861|530858	0.0135523	0.00031315	up	2.58508	2.58508	1.37021	PRKN	Bos taurus parkinson protein 2, E3 ubiquitin protein ligase (parkin) (PARK2), mRNA [NM_001199065]	TCCAAAGAAACAATCAAGAAGACCACCAAGCCCTGTCCCCGCTGCCACGTGCCGGTAGAA///TTGCTGGGAAGATGTCTTAATCCCAAACCGAATGAGTGGTGAATGTCAGTCTCCAAACTG
A_73_P137566	0.00787086	9.21151e-05	up	2.57654	2.57654	1.36544		1184112 MARC 7BOV Bos taurus cDNA 5', mRNA sequence [DN283875]	TTGGTGGTGGTGTGAGTTCTGTTGACTTTACAGTATGGTTTCTTGGTGTTTTCTCTTGGT
A_73_P107916,A_73_P046956|282293	0.00409472	7.65464e-06	up	2.57192	2.57192	1.36285	OPN1LW	Bos taurus opsin 1 (cone pigments), long-wave-sensitive (OPN1LW), mRNA [NM_174566]	ATGGTGATGATCTTCGCCTACTGTCTCTGCTGGGGGCCCTACACCTTCTTTGCCTGCTTT///TTGCAACTTTTTGGGAAGAAGGTGGACGACAGCTCTGAACTCTCCAGTGTTTCCAAAACA
A_73_112349	0.0433381	0.00326682	up	2.56457	2.56457	1.35872		Rep: Seizure related 6 homolog (Mouse)-like 2 - Bos taurus (Bovine), complete [TC416552]	CCCTTCCGAACATGGTGTCCCCGTCTTTGCTTCTGGATTTTTGGTTTTGAGCAATAAACA
A_73_P207402|282297	0.0448036	0.00344696	up	2.5486	2.5486	1.34971	PABPC1P10	LB02241.C21_D19 GC_BGC-22 Bos taurus cDNA clone IMAGE:8595237 3', mRNA sequence [EV702331]	AGAAGTTCTGAATTATCAATCTCCAACAACATGCCAGTGATTTTACCAGCAAGAGTAGGG
A_73_105672	0.026564	0.00129566	up	2.53735	2.53735	1.34332		Rep: Calcium/calmodulin-dependent protein kinase kinase 1 - Homo sapiens (Human), partial (5%) [TC440668]	CTATGAGTGTGTATGAGCGTGTCCTCCTGCATGCATGTTCTGACCTCTGAGGTCCCTCTG
A_73_P119146	0.00633364	5.23721e-05	up	2.53474	2.53474	1.34184		BP250019A10B7 Soares normalized bovine placenta Bos taurus cDNA clone BP250019A10B7 5', mRNA sequence [BF039129]	ACCTGGAATGCCCCCATACCCACTTGTGAACAAATAAAAACACTCTGTCACCAGGAAAAA
A_73_P072541,A_73_P476493,A_73_P072536,A_73_P072546|407152	0.0119913	0.000244732	up	2.48042	2.48042	1.31058	PTPRC	Bos taurus protein tyrosine phosphatase, receptor type, C (PTPRC), mRNA [NM_001206523]	ATGATCTGCATAAGAAAAGATCCAGCAATTTAGATGAGCAGCAGGAACTCGTTGAAAGGG///CTCAAGATGGCCTCCTTGTCCTGGTGAAATACATTTTATGATTTCCTATTTTAATTCCAG///AGTACATCTTGATTCACCAGGCCTTGGTGGAGTACAATCAGTTTGGAGAGACAGAAGTGA///TCTATCATCCAGCAAGAAGCAGCTTGTTTGTAGTCTTTGTGTGTGTGTGTGTGTGTGTGA
A_73_118903|524447	0.0302124	0.00164284	up	2.47348	2.47348	1.30654	LRFN2	Bos taurus leucine rich repeat and fibronectin type III domain containing 2 (LRFN2), mRNA [NM_001192595]	AAATGGCATGCTCTTGCCCTTCGAGGAGAGTGGCCTGGTAGGGGCCCGAGGAACTTTCGG
A_73_P033621,A_73_P463986,A_73_P268496|768207	0.0129709	0.000289637	up	2.47335	2.47335	1.30647	SS18L1	Bos taurus SS18L1, nBAF chromatin remodeling complex subunit (SS18L1), mRNA [NM_001078095]	TTTGCCAATATGGGAATATGCCTTTTGTGTATGTGTGTGTGTGTTTTTAAGTGCTGTATT///ATCAGTCTCTGTTGTTACCCAATGGAAAGGATAAATAAGCTTCACTTGGAGAGGCTGTGA///GCTCATGTGGAAAAGTCAGGTCAAAGGAAAAATTCTACATTTCACTAGTAAGTCATACAG
A_73_115604|513006	0.00787086	9.27983e-05	up	2.46587	2.46587	1.3021	NKG7	Bos taurus natural killer cell granule protein 7 (NKG7), mRNA [NM_001035279]	GGTTCCCTCTCTGATTTAGTCACCCTGCCGTTCATCCTTAGTCCTTGTTCATTTCATTAA
A_73_P327771,A_73_P044906,A_73_P323816|513605	0.0294628	0.00156279	up	2.45698	2.45698	1.29688	GTPBP2	Bos taurus GTP binding protein 2 (GTPBP2), mRNA [NM_001083421]	TAAGTCCTCTCTTGTTTTAGTAGTTTGCAGTGAGCATCCCTTTCCCTCTGTTGCAGGGAA///GGACTCAGGGATTTGGTTGAGGTTTCTCTGCGTGTATGTATATATATATATATATACACA///AGTCTTTCTGAATATTTTGCCTCCACTCACCAATAGCAAAGAGCAGGAGGAGCTCATGCA
A_73_P112371	0.0130195	0.000292708	up	2.45572	2.45572	1.29615		GB	TCTTCCACATGAGATCCCACCACAAAAAGGAGCATGCGGGGCCCAGCCTGCATTCCAAGA
A_73_P061011|516022	0.0368518	0.00241531	up	2.45267	2.45267	1.29435	OR8G5	PREDICTED: Bos taurus olfactory receptor, family 8, subfamily G, member 5 (OR8G5), mRNA [XM_001788420]	TGTAGCCCCTTGCTGTATAATATTATCATTTCACATCAGGCCTGTTTCTCCCTCATTTGG
A_73_114316	0.0216367	0.000846205	up	2.44848	2.44848	1.29189			ATGGTCAAGGTTGCTGTTTTTTGCTATCACTTCTGGATTGTGCTTTGCCTGGTGTTTCTT
A_73_P494913	0.0170188	0.000514914	up	2.44421	2.44421	1.28937			TCTGACGGCAGTGACTTCACTTTTCTAAGGCCCCTCAGCGTTCAGCAGCCCTCAGCTTTC
A_73_108844,A_73_P045476|282365	0.0148954	0.000383694	up	2.4405	2.4405	1.28718	SLC6A4	Bos taurus solute carrier family 6 member 4 (SLC6A4), mRNA [NM_174609]	AATGTGTATGTGTGAGCATGTGTGTCTGTGTGTACAACTGTTCCAGTGTATCCTTACCCA///ACTTAAGGAGCGTATTATTAAAGGTATCACGCCAGAAACACCGACAGCAATTCCCTGTGG
A_73_P257961,A_73_121203|533044	0.0139174	0.000334853	up	2.43431	2.43431	1.28351	PSAT1	Bos taurus phosphoserine aminotransferase 1 (PSAT1), mRNA [NM_001102150]	GCAGCAGCCATGGAGAAGCTTAGCTCCATCAAATCGCAAATGATTTATGATATTATTGAT///ATGCTGTGAGTTTGGGAAGATCTTTGCTGAAGACTCTTTTCCCCTGTTATTCACCCATTG
A_73_112265,A_73_P367536|519193	0.0180169	0.000575676	up	2.43121	2.43121	1.28167	GPR21	Bos taurus G protein-coupled receptor 21 (GPR21), mRNA [NM_001098047]	GCTGTGTGTTTTGTGTGTGTGTTTCCTTTTTATCTTTTTGTATCTCTAGTTCTCCGGGAA///TCCTTTTTCCACTGGGGCAAACCTGGATATCATGGAGATGTGTTTCAGTGGTGTGCAAAA
A_73_102351,A_73_P327121|529235	0.00128531	9.79548e-08	up	2.42515	2.42515	1.27807	DDIT4	Bos taurus DNA damage inducible transcript 4 (DDIT4), mRNA [NM_001075922]	TACATGAAGATACTCGCTGTTCATGAATACACTTGATGTTCAAGTATTAAGACCTATGCA///TCTTTGTTTTTGTTTTTTGATCATAGCTTCACTACTGACCTGTTCGAGGCAGCTATCTTA
A_73_101333	0.00362876	4.00999e-06	up	2.42189	2.42189	1.27613		Rep: MGC80202 protein - Xenopus laevis (African clawed frog), partial (8%) [TC418929]	TGGGGCCCGTGTGCACTTGGCGTCATGTGTGGTCCTGTCTCCAATAAAAAGTCTCGTGGT
A_73_P046416|280904	0.00506393	2.0075e-05	up	2.4161	2.4161	1.27268	PTN	Bos taurus pleiotrophin (PTN), mRNA [NM_173955]	ATGTAAGATCCCCTGCAACTGGAAAAAGCAATTTGGAGCGGAGTGCAAATACCAGTTCCA
A_73_109336	0.00806579	9.88579e-05	up	2.38571	2.38571	1.25442		Rep: PREDICTED: RIM-binding protein 2 - Pan troglodytes, partial (19%) [TC423088]	TTCAAAGGAAATTACTCTCTGTGTGGTTAACTTCTGCGTGGGTGTGTGCATGTGTACAGC
A_73_P034201|615414	0.0161631	0.000461553	up	2.3691	2.3691	1.24434	CCND2	Bos taurus cyclin D2 (CCND2), mRNA [NM_001076372]	AATCCGCTCTCTCCTTCTCTCTGGTTGTATTTGGTTCTCTTACATTTTAGGATGAAACTT
A_73_P250826,A_73_P035266|510325	0.025978	0.00124434	up	2.35991	2.35991	1.23873	FAM214B	Bos taurus family with sequence similarity 214 member B (FAM214B), mRNA [NM_001014893]	ATTTATTCAAATTGGATTGCCTTGGTAACCTCCCAAACCTGATAATTGGCATTGCCCCCC///TCCTGAAAGCCAACTTGTGTGTGTGTATGTTTGTGTGTGTGTGTGTTGTGTGTGTGGTAT
A_73_P400986,A_73_P038211,A_73_110135,A_73_P170562,A_73_P410301|280936	0.0249535	0.00112436	up	2.34831	2.34831	1.23162	SV2A	Bos taurus synaptic vesicle glycoprotein 2A (SV2A), mRNA [NM_173962]///Rep: Synaptic vesicle glycoprotein 2A - Bos taurus (Bovine), complete [TC423652]	CAACATGCGAGCCAAGGGGCATCCTGAGCGAGTCTTCTCGGTAACCCACATTAAGACAAT///TACTGTCCTAAAATACAAGCCAAGGGTAATTTCAGTGGACACACACACAGGTACCTGCTC///CCTGGAGGGACCCATCCATCTCCCTTACTCTCCTGGGGAACCCTAAATCTAACTCTGTTG///TTCTGAGGCAGCTCAGCAGGACTGTGTGTGTGTGAATGCTTGTATACACTTATGTATGTG///TAGTCTTAGCCATGTATGCGTGAGTGTGTGTGTGTATGTATGTGTGTGCATGTGTGAGAC
A_73_P066556	0.00546968	3.23058e-05	up	2.34559	2.34559	1.22995		PREDICTED: Bos taurus myosin XVB pseudogene (MYO15B), miscRNA [XR_082718]	AGTCTGGTTTGGACTTCAGTGCTTGGCTGTCCTGGAATCCACTGTAGCACGGCCCACAGT
A_73_P035866|510772	0.025978	0.00124456	up	2.33497	2.33497	1.22341	PNLIPRP2	Bos taurus pancreatic lipase related protein 2 (PNLIPRP2), mRNA [NM_001105355]	CCCTTGTTAAAAATGCGGTGCCCCTTTAATCTTTCTGATAATAAAATTTCAATGGCTTTG
A_73_P086541|617708	0.0315165	0.00180623	up	2.3103	2.3103	1.20808	SLC18A1	Bos taurus solute carrier family 18 (vesicular monoamine transporter), member 1 (SLC18A1), mRNA [NM_001193171]	GTACCAGCTTACTTTGTGTTCCTCTGGCTCATGATATTTTTGGTCTCATTGGCCCCAATG
A_73_P079071,A_73_P102501|282856	0.0179873	0.000569577	up	2.30005	2.30005	1.20167	PCK2	Bos taurus phosphoenolpyruvate carboxykinase 2, mitochondrial (PCK2), mRNA [NM_001205594]///Rep: Phosphoenolpyruvate carboxykinase - Bos Taurus, complete [TC425177]	TAGGCTTGCAGAAACTATGAGCAACTTAACAACACTCTCATCCTCTGGGTGCTATGGGAT///CAGGCCCCAGAGCTTTCCCCACATGCTGCCTAATAATGAAATGCTCATTTATATAAAAAA
A_73_110680	0.0239059	0.00102299	up	2.29813	2.29813	1.20046		Rep: cDNA FLJ77965 - Homo sapiens (Human), partial (20%) [TC444178]	AGGAGGTTCCCAGCTAGACTCTTCAGCCAAATGCCTGAGCTTAGTCCCCTGCCTGTCACT
A_73_P471298	0.0479579	0.00396622	up	2.26821	2.26821	1.18156		Rep: Poly (ADP-ribose) polymerase family, member 4 - Homo sapiens (Human), partial (8%) [TC478516]	GCCGAATCTTTTTTCCTGTTCTGCAAGTCTTCTCCCTTGTCCACTTGTAAAGTCTGTCTT
A_73_108306|507550	0.0357732	0.00230141	up	2.26762	2.26762	1.18118	LOC507550	Bos taurus uncharacterized LOC507550 (LOC507550), mRNA [NM_001098903]	GGAGTTCTATGTTGAGACGCACTGGGCAGAACTTCATGTCACTGTCAAAGGTGGTATAAA
A_73_P495398	0.0406249	0.00289208	up	2.25639	2.25639	1.17402			TACCAGTGTCTTCAGTATCATGTGGAAAAGACCTTTTTATTCTCATCACAATTAGAGAAC
A_73_P081586|788673	0.0405067	0.0028725	up	2.25248	2.25248	1.17152	HECA	hdc homolog, cell cycle regulator [Source:HGNC Symbol;Acc:HGNC:21041] [ENSBTAT00000034262]	TTTTCTAATTGAAAGGAGAGTTCCTTTGTGTACTTGTGCCTGCCCCTTGCCCTCTCTTGA
A_73_118868|614322	0.00465422	1.44124e-05	up	2.24815	2.24815	1.16874	RUNDC3A	Bos taurus RUN domain containing 3A (RUNDC3A), mRNA [NM_001076322]	TCAGGAAGCTGCTTCTTCCGGTGACCCCGATGCCTGGTTAGCTCCCAGCTGGACTCTCCT
A_73_P491188	0.00900926	0.000137475	up	2.24476	2.24476	1.16656			CTGCGGCGTCTGCCGTCGTCTTGCCCTCGTCCCCTTTTTCTAACTGAAAAAGCCTGGTGA
A_73_103611	0.0279343	0.00142636	up	2.23644	2.23644	1.1612		PREDICTED: Bos taurus uncharacterized LOC100847753 (LOC100847753), miscRNA [XR_139607]	CCCTCACCCAAGTGGTCTCTCTCTGCAGTTATTTAATGCCTGTGTCTGATCTACTGTAAA
A_73_P092586|524042	0.0158871	0.000438549	up	2.2348	2.2348	1.16014	GJA8	gap junction protein alpha 8 [Source:HGNC Symbol;Acc:HGNC:4281] [ENSBTAT00000029102]	TTATTTCCCTTTGACGGAGGTGGGGATGGTAGAGGCCAGCCCCCTTTCTGCCAAGCCTTT
A_73_P108106,A_73_P045026|282201	0.00307331	2.50123e-06	up	2.21422	2.21422	1.1468	CRABP1	Bos taurus cellular retinoic acid binding protein 1 (CRABP1), mRNA [NM_181028]	ATCCTGACGTTCGGCGCCGATGACGTGGTCTGCACGAGGATTTATGTTCGGGAATGAAGG///GATGTCCCCCCAGTAATGCTGTAGTGTTTTCCCCAAGGCTTTGTGCCTCTGTCTCCCTGG
A_73_P464881,A_73_121406,A_73_P034521|408010	0.0325946	0.00192018	up	2.21322	2.21322	1.14615	GARS	Bos taurus glycyl-tRNA synthetase (GARS), mRNA [NM_001097566]	ACTGATGAGATTGGTGTGGCTTTCGGCATAACCATTGACTTCGATACAGTGAACAAGACC///TTGATGTCTGATAAGAAGTGTTCTGCTGAGAAGAAATCAGAGATGGAAAGTGTCTTGGCC///GAGGCAATCGAAGAATGAGAACAGTTTTGGCAACTTATGACCATTTGCTCTAATAAAAGA
A_73_104394	0.0165387	0.000483081	up	2.20082	2.20082	1.13804		GB	GACTTTCCTCAGCAAACTATCTTTTCAGCGTCTGAGTGGCCCGTGTGGAGGTGGTCAGAA
A_73_P055595	0.0125557	0.00027378	up	2.18849	2.18849	1.12994		GB	ATCGTTCTTAATAATGCTGTGATGTATTTTGCAGTTGGGCTTTTCGGTGCTGTCCCCCTG
A_73_102311	0.0173023	0.000528107	up	2.1726	2.1726	1.11942			TATTAATAGGTGTGTGTGTGTCCAAGTGCAGGCATATAAAAACTTCAATTTTCTGACTTG
A_73_102074	0.00428729	1.13701e-05	up	2.17164	2.17164	1.11879		1250463 MARC 7BOV Bos taurus cDNA 5', mRNA sequence [DN513504]	GAGGGCTGCCGGGCTGGCCCCAGTCCCACCTCTGTTTATTCTGTACTACAACCTGTAAAT
A_73_114117	0.0208132	0.000769815	up	2.1682	2.1682	1.1165			ATCTTCCCATTTCCTATCTTTTTGTATCTGAAGTCTTCCTAATGTACTGCACAAACCATG
A_73_P102521,A_73_P356916,A_73_103367|326577	0.00900926	0.000136193	up	2.16489	2.16489	1.11429	SLC1A4	Bos taurus solute carrier family 1 member 4 (SLC1A4), mRNA [NM_001081577]	AAGTGCATTGAAGAAAACAATGGTGTAGACAAGAGGATCAGCCGGTTCATTCTCCCCATC///TTGGGCCATTTTATTCACGGAGGAATTGTTCTGCCACTTATTTATTTTGTCTTCACGAAA///GCTGTTCATCTCTTTTCAATATGTGACACTTGCCTTAAAACATAGCAGTCTTCAAAATGA
A_73_110746|540175	0.0468745	0.00376732	up	2.16031	2.16031	1.11124	GPRIN2	Bos taurus G protein regulated inducer of neurite outgrowth 2 (GPRIN2), mRNA [NM_001205783]	CTCTGCCATGGTTTCCCCCAGGCCTCTTTGTGGCTTTATTTTCACAGCAGTGCTGAGATA
A_73_P128386	0.00843702	0.000112047	up	2.16006	2.16006	1.11107		LB0181.CR_J24 GC_BGC-18 Bos taurus cDNA clone IMAGE:8357978, mRNA sequence [DV905987]	TAAAGAAAACTGGAGTTAGGCCCCCAATGTGTTCCCTCTCCCTAGCATTTTACTTAATGT
A_73_P042321|613798	0.0312779	0.00176633	up	2.15819	2.15819	1.10982	LSMEM1	Bos taurus leucine rich single-pass membrane protein 1 (LSMEM1), mRNA [NM_001099718]	GAATTGTTTGTATTCAAGGGGATCAGGTGATGATTCTTTTCAATAAAAGAGATTCTGCTC
A_73_P075536	0.0348636	0.0021867	up	2.15722	2.15722	1.10917			ATATTTGTGTCATCCTGGTCTTCTACGTGCCTGGAATATTCTCCTTCCTCACTCACTGCT
A_73_P075686|788295	0.00900926	0.000135086	up	2.15672	2.15672	1.10884	OR52D1	PREDICTED: Bos taurus olfactory receptor, family 52, subfamily D, member 1 (OR52D1), mRNA [XM_001255397]	GGGTCTGGATTCTATTCTTATTTCTGTCTCCTATGGCTTCATCCTCCATGCTGTCTTTCA
A_73_112397|615863	0.0185266	0.000617011	up	2.15609	2.15609	1.10842	ZC3H12D	zinc finger CCCH-type containing 12D [Source:HGNC Symbol;Acc:HGNC:21175] [ENSBTAT00000009713]	AGGCTCATGCTCCTCATCCAGAGATTCCAAAGGTCCAGTGCGCCCGTGGGGAAGCGCTGA
A_73_107259|509916	0.0252931	0.00116428	up	2.14395	2.14395	1.10027	OR2S2	olfactory receptor family 2 subfamily S member 2 (gene/pseudogene) [Source:HGNC Symbol;Acc:HGNC:8276] [ENSBTAT00000039087]	CTGGCTCCTGGGCTATTGGTGGTGTTGCTTCTCTGGTTCACACATCCTTGGTAATTCAGC
A_73_107743	0.0147697	0.000378112	up	2.14041	2.14041	1.09789		Rep: Cell division control protein 6 homolog (CDC6-related protein) (p62(cdc6)) - Homo sapiens (Human), partial (24%) [TC452408]	CCGCTTCACAAAGGTACAACGACCTGCTTCTTTGGGACATTGCTTTTAATTGTCCTGCTT
A_73_P144361	0.0167012	0.000496315	up	2.13728	2.13728	1.09578			AACAGCTTCATCACCTCCGAGCTGTGTTTCTGTGCCCCCAAAGTAGGGACCGTCCTGGTT
A_73_107687|538722	0.024091	0.00103666	up	2.13123	2.13123	1.09169	SCN2B	Bos taurus sodium voltage-gated channel beta subunit 2 (SCN2B), mRNA [NM_001192074]	AGGCTTTCTGGCTGTGGTCATCTTGGTGCTGATGGTGGTGAAGTGCGTGAGGAGGAAAAA
A_73_113219,A_73_P333671|539606	0.00777191	8.93792e-05	up	2.13113	2.13113	1.09162	PYCR1	Bos taurus pyrroline-5-carboxylate reductase 1 (PYCR1), mRNA [NM_001014957]	CCTTTCCTAGCCTGACCCACAGACGCTGTCAGCTCTGTCTCTTAACTTTTTAGGATAAAT///ACACATCATCCCCTTCATCCTGGATGAGATCGCCGCCAACATTGAGGCTCGGCACATCGT
A_73_P130161	0.02929	0.00153911	up	2.12615	2.12615	1.08824		PREDICTED: Bos taurus leukocyte immunoglobulin-like receptor, subfamily B, member 5-like (LOC782062), mRNA [XM_003585344]	GCCCACACGAAGCAGGGAAGATCCAGCACAGCCACAAATAAACAGATTACTAAAACACTG
A_73_P075396|782766	0.0131361	0.00029683	up	2.12475	2.12475	1.08729	OR10A3	GB	GTCCTTGGCTTACTCTCTTCTTACACCTCTGCTGAATCCACTGATATATAGCTTGCGCAA
A_73_P042221,A_73_116098|281386	0.00913382	0.000143957	up	2.12265	2.12265	1.08586	SERPINF1	Bos taurus serpin family F member 1 (SERPINF1), mRNA [NM_174140]	TTTCATCTTTGTACTGAGGGACACAGACACAGGGGCCCTTCTCTTCATAGGCAAAATTCT///AAACACTAGAGGGATGGCAGATTATATATTATACGAAGGCTGCCCCTACATTTCAATGTA
A_73_114743|282005	0.00610503	4.81554e-05	up	2.11477	2.11477	1.0805	PROCR	Bos taurus protein C receptor (PROCR), mRNA [NM_174437]	AGATTTGGGAAGAGACACTGGTGCAATAGAGGTAGTGGTAACCAGAGAAATGATGAAAGT
A_73_P066911|528068	0.00900926	0.000131906	up	2.11137	2.11137	1.07818	ABCC12	ATP binding cassette subfamily C member 12 [Source:HGNC Symbol;Acc:HGNC:14640] [ENSBTAT00000060942]	TTTTTTATGGTGCTGTTTATTCTCGTGATACTGGCCGCCGTGTTCCCTGCTGTCCTTTTA
A_73_103291	0.0311635	0.00175037	up	2.10776	2.10776	1.07571		Rep: Transcription factor Sp4 (SPR-1). - Canis familiaris, partial (97%) [TC479076]	CAGGCACAAAGAGGTTGAGCTTGTTATTCATGTCGGTCCCCTTCATCTCACTTCAGTTTT
A_73_P088956	0.00806579	0.000101118	up	2.10543	2.10543	1.07411		kielin/chordin-like protein [Source:HGNC Symbol;Acc:HGNC:17585] [ENSBTAT00000033567]	ACTGACCAGGACTCATCCGGACATGAAGTCTCCTTTTGGCGAGCACCTCCCGCCCGACCT
A_73_107956	0.00916064	0.000145274	up	2.09711	2.09711	1.0684		708142 MARC 6BOV Bos taurus cDNA 5', mRNA sequence [CB453187]	TTGTGATGGAGTCACTTCTGTTTTTATCTGCCCCTTCATCCTCCTGTTTCCTCAGCATTA
A_73_121077|517359	0.0183117	0.000603574	up	2.09267	2.09267	1.06534	CD19	Bos taurus CD19 molecule (CD19), mRNA [NM_001245998]	TGTGTGTGTGTGTACAAGTGAAACTTCAGCCCCCTTTGCACTCCCCAAATAAACTGTGTA
A_73_P083771|506272	0.0102026	0.000180392	up	2.08212	2.08212	1.05806	TMEM221	Rep: Multicopper oxidase family protein, expressed - Oryza sativa subsp. japonica (Rice), partial (5%) [TC421494]	TAACAGGTCTGACTGGTTTCTCTATGACTGCCGCCTCCTCAGACATGTGGCTCTCGGCCT
A_73_115442|508160	0.0209258	0.000790565	up	2.0819	2.0819	1.0579	PADI3	PREDICTED: Bos taurus peptidyl arginine deiminase, type III (PADI3), mRNA [XM_010802689]	TATGTCCGTTCCATGGGTGCTCTGTGTGGGGCCAGCTGTGCTTCCGTCACTGGCTAATAA
A_73_P393431,A_73_P164982,A_73_115055|508601	0.0171031	0.000520725	up	2.07909	2.07909	1.05595	CETN2	Bos taurus centrin 2 (CETN2), mRNA [NM_001038515]	GTGTGAAGCCTGGTTTTTGAAAATGTAAATTATTTTTCCCCACTGACATCTCAGTATAAC///AGAAGAAATCCTGAAAGCCTTCAAGCTCTTTGATGATGATGAGACTGGGAAGATATCGTT///AGTGAACTCTTACTTGCATTTGGATGTGTGTGTGTGTGTGTATGGGCTATTTGTTTTATT
A_73_110701	0.0124406	0.000267006	up	2.07544	2.07544	1.05342		Rep: Reverse transcriptase-like - Bos taurus (Bovine), partial (16%) [TC479243]	ATATTTTTACTTTCTCTTTCAAAGGTGCAACCCCTCTATGCCCTTCACTTGACTTGCCAA
A_73_P355841,A_73_105037|282351	0.0190186	0.000646444	up	2.07346	2.07346	1.05204	ST3GAL1	Bos taurus ST3 beta-galactoside alpha-2,3-sialyltransferase 1 (ST3GAL1), mRNA [NM_001097983]	TCTGCCCAAAGATCATTAAACTGTGGCCATGAGGGGTCCCCGCCCTGAAGGTCTTCAGGA///GGTACACGATGGGGACTTCGAGTCCAACGTGACGGCCACCTTGGCGTCCATCAACAAAAT
A_73_P059446|100298658	0.0198362	0.000699008	up	2.07118	2.07118	1.05046	LOC100298658	GB	TCACCTCATTGTCCTCTCCCTGATGTACGGCAGCTGTGTGTTTATTTATGTGAAACCGAA
A_73_P084336	0.0419139	0.00306154	up	2.07026	2.07026	1.04981		Rep: Uncharacterized protein ENSP00000381108 - Homo sapiens (Human), partial (49%) [TC484445]	AGCTCCCTGGAAATCTTTCCAGCTTTGGAAGTGCCACCTCCAGCTGTTCAAGGCCTGGAC
A_73_P068101|615876	0.0255619	0.00119956	up	2.06738	2.06738	1.0478	LOC615876	PREDICTED: Bos taurus carcinoembryonic antigen-related cell adhesion molecule 18 (LOC615876), mRNA [XM_015458248]	TTGGTGTTTCTCATCATATTCACAGTTCTGGGCTTCACCCACTTCCTTATGGTCCTGATC
A_73_117564	0.0274321	0.00138182	up	2.06723	2.06723	1.0477		PREDICTED: Bos taurus zinc finger protein 333 (ZNF333), mRNA [XM_001256331]	CTTTATCTGTGTCTCTTCCCATGGAAGGGCCCCTTGCTGATGAACTTCCTGTTTCTACAG
A_73_104611|539207	0.00409472	7.62738e-06	up	2.05724	2.05724	1.04071	BHLHE23	basic helix-loop-helix family member e23 [Source:HGNC Symbol;Acc:HGNC:16093] [ENSBTAT00000014445]	AGACAAGTGCGCCGCCTTCTCCGGGACGCCCTCGGCGCTTTGCAAACACTGTAACGAGAA
A_73_P112716	0.043793	0.00332076	up	2.05327	2.05327	1.03793		myosin light chain kinase family member 4 [Source:HGNC Symbol;Acc:HGNC:27972] [ENSBTAT00000044315]	AACTTTGGAACTCCTGAATTCCTCGCCCCTGAAGTTGTGAACTACGATTTTGTCTCCTTC
A_73_P068421	0.0256508	0.00121657	up	2.05059	2.05059	1.03604		GB	TCTTCAGAACCACCTTCCTGAGAGAGTTCTGTGTGGGCCGCTGTGTGTCGTCACATCCAG
A_73_119393	0.0053713	2.46969e-05	up	2.05045	2.05045	1.03594		Rep: MAGED4B protein - Homo sapiens (Human), partial (5%) [TC483418]	GATTTTCTAGCCCAGGCTCCCCCCATCATCAGTGCTTGGAGATCTCTTGTGCCCTCACAA
A_73_100258	0.0499848	0.0043027	up	2.04791	2.04791	1.03415		Rep: Homeobox protein Hox-C6 - Homo sapiens (Human), complete [TC404592]	GCTGTATTTGTGGTCTCTGTATTTATATTTATGTTTAGCACCGTCCGTGTTCCAATCCAA
A_73_117098	0.0176586	0.000549871	up	2.04489	2.04489	1.03202		fms related tyrosine kinase 4 [Source:HGNC Symbol;Acc:HGNC:3767] [ENSBTAT00000040219]	TGGCTACTTGTCCATCATCATGGACCCCGGGGAGGTGCCTTTGGAGGAGCAGTGTGAATA
A_73_116162,A_73_112600|509863	0.0186802	0.000625688	up	2.04458	2.04458	1.03181	SESN2	Bos taurus sestrin 2 (SESN2), mRNA [NM_001024507]///Rep: Rufy1 protein - Rattus norvegicus (Rat), partial (28%) [TC448422]	ACCTGGGTTCAAATCATAACACTATCACTTGGGAGCTCTGTGATCTTGGGCAGGTCATTT///GAAGAGGCCCCAGCATTGGGGTTTGGATTCTAGAGGGGACATGATGACCGTCAGGGTCAA
A_73_121382	0.023624	0.000998323	up	2.04193	2.04193	1.02993		Rep: Beta-1,4-galactosyltransferase 1 (EC 2.4.1.-) (Beta-1,4-GalTase 1) (Beta4Gal-T1) (b4Gal-T1) (UDP-galactose:beta-N-acetylglucosamine beta- 1,4-galactosyltransferase 1) (UDP-Gal:beta-GlcNAc beta-1,4- galactosyltransferase 1) [Includes: Lactose synthase A protein (EC 2.4.1.22); N-acetyllactosamine synthase (EC 2.4.1.90) (Nal synthetase); Beta-N-acetylglucosaminylglycopeptide beta-1,4- galactosy…	CTGTGGGACCTGGGTCTTGTGGCAGCTCTGTGATGACCACTTGTCCCTTTGCTCCTTACA
A_73_P175972	0.0368471	0.0024136	up	2.03786	2.03786	1.02705		bov_0B01-005-e07 Day 3 Oviduct bov Bos taurus cDNA 3', mRNA sequence [CK730196]	TGAAGTGAATTCGGCAGCGTTCATTAAACACCTTCCAGCTCCTGGCATTTACCACTTCTT
A_73_P065446|506648	0.019614	0.000686114	up	2.03623	2.03623	1.0259	SLC47A2	Bos taurus solute carrier family 47 member 2 (SLC47A2), mRNA [NM_001192102]	ACATCTTCTTCCAGCTGTTTGATGCCCTCTGTTGTCTCTACGCTGGGGTCCTGCGTGGGA
A_73_P076846|514366	0.0204966	0.000738856	up	2.02287	2.02287	1.0164	OR4D9	Bos taurus olfactory receptor, family 4, subfamily D, member 9 (OR4D9), mRNA [NM_001206742]	TGGTTCATATTCTTCTTTCTCCTCGTCTCCTACACAGTCATTCTGACAATGCTGAGGTCC
A_73_114564,A_73_P046186|538050	0.00542407	2.90241e-05	up	2.02164	2.02164	1.01552	RAB7B	Bos taurus RAB7B, member RAS oncogene family (RAB7B), mRNA [NM_001078013]	TAACTGACCTGGAGTCCTTCGAAGCCCTGGAAACCTGGCGGGGTGATGTTCTGGCCAAAA///TTCAGTGGGCGTAGGGACCATTCTAAAAGTGCACAACAGATAATAAATGTCTTTCTTAGT
A_73_116340	0.0214335	0.000830618	up	2.02038	2.02038	1.01463		PREDICTED: Bos taurus Ras association (RalGDS/AF-6) domain family member 4 (RASSF4), transcript variant X1, mRNA [XM_005226559]	TCTCCTTTGTCAGCAGAGTTTCCGAGGTACTCAATAAAGGTGTTGCCATGTGGAACCAAA
A_73_111682|504216	0.00771265	8.72864e-05	up	2.01715	2.01715	1.01232	NPY	Bos taurus neuropeptide Y (NPY), mRNA [NM_001014845]	CTATGTGGTGATGGGAAATGAAACTTGCTCTCCAGTCTCTGCCTCTTTTTCAGCCCCCAT
A_73_106558|505490	0.0252609	0.00115924	up	2.01672	2.01672	1.01201	TMEM40	transmembrane protein 40 [Source:HGNC Symbol;Acc:HGNC:25620] [ENSBTAT00000066256]	AGTTTTTCCATTTCATCCTCCTCTGCTTTGCCATTGGGGCCTTGCTGGTGTGTTATCATT
A_73_110101,A_73_P128691,A_73_P105991|528174	0.0379559	0.00255454	up	2.01265	2.01265	1.0091	ADGRD1	Bos taurus adhesion G protein-coupled receptor D1 (ADGRD1), mRNA [NM_001034564]///Rep: Isoform 2 of A6QLU6 - Bos taurus (Bovine), complete [TC394238]	GGAAAGAATTGTGTGTTTAAAGTAGTTTATAGCACAGGAAAGGTGATGAATGCAACTATG///TGCCCAAGAGCACCTAGAAGTGAGAACACTGTATTCCTAAGATTTACACTTGGATTTTTT///TTTTACAGATGTGTGCACAGCAACTGTGGCTATTTCTGTTTTACAATAAATGTTGTCGGG
A_73_P083066,A_73_P083072|100851523	0.0492967	0.00418229	up	2.00993	2.00993	1.00714	LOC100851523	GB///PREDICTED: Bos taurus olfactory receptor 1J4-like (LOC100851523), mRNA [XM_003584819]	TTCCTCTTTTTTACTGATCTGGATGATTTCCTGCTCACCTCGATGGCCTATGATCGGTAC///CATCCAGCACCTCTAATGACAAGAACATAATAGCTTCAGTGATGTACACAGCGGTCACAC
A_73_115436,A_73_P043841,A_73_P415786|282087	0.0488514	0.00410089	up	2.00938	2.00938	1.00675	SYNJ1	Bos taurus synaptojanin 1 (SYNJ1), mRNA [NM_174468]	GGAGTCTCCGCCGTCAGACTGGACTGCCCATTAAAGAGTGACCCATTTGAAGACTTGTCA///TGGAAGAAGAAATGAGCTTAGAGAAAATCAACGTCCCCTTGCCATCATCAACCAGCTCCA///TGAATGGTGATTCAATCAGTAAGATTTATGCAGGAACTGGAGCCCTTGAAGGAAAGGCTA
A_73_114873,A_73_P256621|539487	0.0161631	0.000463159	up	2.00832	2.00832	1.00599	NEUROD1	Bos taurus neuronal differentiation 1 (NEUROD1), mRNA [NM_001103288]	TGTTTGTAATCCTGTATATTATGGTGTAATGCACAACTTAGAAAACACTCATCCAGTTGC///GGAACCTTTCTTTGAGAGCCCTCTGACTGATTGCACCAGCCCTTCCTTTGACGGACCCCT
A_73_P254001,A_73_P042826,A_73_P092821|281476	0.0109767	0.00020328	up	2.00783	2.00783	1.00564	SARS	Bos taurus seryl-tRNA synthetase (SARS), mRNA [NM_174175]	ATCGTGAATATCGTCTCAGGTTCTTTGAATCATGCTGCCAGTAAGAAGCTTGACCTGGAG///ACTCAAAGGGAACCATCTGCCACATACAGTGTGACGTTCTCTTTTCTCATTTGGGCATAG///TTCGGGCAGACAACTTGAACAAGCTGAAGAACCTATGCAGCAAGACAATTGGAGAGAAAA
A_73_P396381	0.0112123	0.000211061	up	2.00779	2.00779	1.00561		immunoglobin superfamily member 21 [Source:HGNC Symbol;Acc:HGNC:28246] [ENSBTAT00000025516]	AACTATTTCCAGTCTTGTTCTTAGTCTCTTTCTGTCCGTGTCTTGGCTCCTTCGGTCAAT
A_73_P130981	0.0456218	0.00357127	up	2.00644	2.00644	1.00464		SHC adaptor protein 3 [Source:HGNC Symbol;Acc:HGNC:18181] [ENSBTAT00000015112]	TCTTTGACATGAAGCCTTTTGAAGATGCTCTCAAGATTCAGTCCTTGGGGCCTGTGTTGA
A_73_119507|539100	0.00657632	5.58823e-05	up	2.00614	2.00614	1.00442	KLHDC7B	kelch domain containing 7B [Source:HGNC Symbol;Acc:HGNC:25145] [ENSBTAT00000063783]	AGACCAAAGGGGTCCTCTGCCCGTTCACCCTGACTCTTCCTGCCAGGGGCCCACTGCAGA
A_73_105207|520936	0.0174427	0.000541035	up	2.00463	2.00463	1.00334	PROM2	prominin 2 [Source:HGNC Symbol;Acc:HGNC:20685] [ENSBTAT00000002536]	CTGGTTCTGCCTGGGGTGGTGCACCTTCTTCCTGATCCCCAGCATCGTCTTTGCTATCAA
A_73_P428486	0.0156082	0.000421047	up	1.99471	1.99471	0.996179		Rep: G-protein coupled receptor 114 - Bos Taurus, partial (95%) [TC412351]	TCTGCTGCCCAGAATGCCTCCTTCTTTTCTACTTGGCCCCGCGAGAATCAGGTGGGCTTT
A_73_P440816,A_73_106263|518752	0.0118189	0.00023464	up	1.99416	1.99416	0.995781	ARG2	Bos taurus arginase 2 (ARG2), mRNA [NM_001017942]	ACCAACTTCCAACTCCCAGCTCACCAGATGAATCAGAGAGTGAAGAACGTGTAAGAATTT///TAGTACTGTACTGTATTTGGTTTTTTGACGCTCACAGGGTATTAATATGTTGGAGCGCTA
A_73_104613,A_73_P381176|508271	0.0348636	0.00218626	up	1.99298	1.99298	0.994928	DSN1	Bos taurus DSN1 homolog, MIS12 kinetochore complex component (DSN1), mRNA [NM_001100323]	GAAGTGAACAGTAGCGTGGAGTTATACCTCAGTGTTAACAGCCAATAAAACAGCAACTAA///ATAAATCGTCTGCCTCCCTGAAGAGGACTGAACGTGTTTCAAAGGAACGAATTCACCTTG
A_73_P201967,A_73_121006|519165	0.047643	0.00390466	up	1.99055	1.99055	0.993166	HLX	Bos taurus H2.0 like homeobox (HLX), mRNA [NM_001101097]	TAAATTTAGCTCTTAAGGCTTAGCTGTTTGGGTGTTTCTTTCGGTGCCCGATTCCCGTCT///AGGTTTGAGATTCAGAAGTACGTGACCAAGCCAGACCGAAAGCAGCTGGCCGCGATGCTG
A_73_117867	0.025978	0.00124482	up	1.98928	1.98928	0.992246		Rep: Isoform 2 of Q7Z7B0 - Homo sapiens (Human), partial (18%) [TC416446]	TGATCAGGGCAACTCAGATGGTTGCTCTTTTCTGCCCCTGCTATGATTAAGTCCTTTCTT
A_73_P070621|785125	0.0249026	0.00111688	up	1.98728	1.98728	0.990798	ZNF140	zinc finger protein 140 [Source:HGNC Symbol;Acc:HGNC:12925] [ENSBTAT00000052977]	GAGAACCCCTATGAATATGAAAATTCATTTAATTACCACTCATTCCTTACTGAACACCAG
A_73_101478|530544	0.0173357	0.000529789	up	1.9864	1.9864	0.990153	CAPN12	Bos taurus calpain 12 (CAPN12), mRNA [NM_001192697]	TGCGTGTGGACTTTGAGCGCTTCGTGTCCTGCATGGCCCAGCTCATCTGCGTCTTCCGCT
A_73_P493118	0.0282156	0.00145175	up	1.98523	1.98523	0.989309		GB	TTATGGTTGATACAGACCTCTAATGTTTTGGGTTCCTGTTTTCCCACCATTTCCCCTTTC
A_73_118979,A_73_P107966|282202	0.00887382	0.000120892	up	1.98521	1.98521	0.989295	CRYBA1	Bos taurus crystallin beta A1 (CRYBA1), mRNA [NM_174523]	AGTGGATTAAAAGCTCCAAGTAAGAATTCCTCAAGCATGAGACCTTCCTAAACAATCTAG///ATGTCCTTCCGCCCCATCTGTTCAGCTAATCATAAGGAGTCTAAGATTACAATTTTTGAG
A_73_P066211|509801	0.0304746	0.00166987	up	1.98407	1.98407	0.988464	CD79B	CD79b molecule [Source:HGNC Symbol;Acc:HGNC:1699] [ENSBTAT00000061488]	ATCATGATCCAGACCTTGCTTATCATTCTGTTCATCATTGTGCCCATCTTCCTGCTGCTG
A_73_112591|522374	0.0158871	0.000444352	up	1.98354	1.98354	0.988081	PAQR9	Bos taurus progestin and adipoQ receptor family member 9 (PAQR9), mRNA [NM_001077951]	CACCGTGGGCTACATGCTGCTGCTGGTCGTCTGCCTGGGGCTGGTCATCAAGAAGTTCCT
A_73_P363401,A_73_P351126,A_73_117446,A_73_P411001|532640	0.0406923	0.00290762	up	1.98326	1.98326	0.987877	NRAP	Bos taurus nebulin related anchoring protein (NRAP), mRNA [NM_001098072]	TTCAAAGTGATGTGAGATACACAGAGGCCTATGAACAGCAGAGAGGGAAAGGCAGTTTTC///AGTGAGACCAAATACCGTGAAAAACCAGACACCATCAAGTTTACCACAGTGGTTGACTCC///CTTCAGTCGGAGCCAGCTGTGAAAACGGCGCCCCTGCCCTAGCCCTCCCTTATTAAAATA///CTGACTATGAGAAAAACAAGTTGAATTATACGTTGCCCAAGGATGGCCCTCAGCTGGTGA
A_73_105858,A_73_P360911|617975	0.0428801	0.00320583	up	1.98266	1.98266	0.987437	H1F0	Bos taurus H1 histone family, member 0 (H1F0), mRNA [NM_001076487]	CCCCTCGCCCCTTTTTATTTTTAAATAAGTGTTATTTGTGCCTGGAAGAACTTGCTGTCT///TGTGTGTGTATATATATACATATCTAGGGCTAGTACTTAACGTTTCACACCCGGGAGCTG
A_73_P086246|100295817	0.0146455	0.000368035	up	1.98009	1.98009	0.985569	DOCK8	Bos taurus dedicator of cytokinesis 8 (DOCK8), mRNA [NM_001191532]	AGGCGTGCTTTTTCACATAATTGTACAAAACAAGGCATAAATAACATCTCCTGCTGAGTG
A_73_P288946,A_73_121063|505647	0.0235361	0.000990126	up	1.97959	1.97959	0.985201	CFD	Bos taurus complement factor D (CFD), mRNA [NM_001034255]	TCAAGTCTACGGAGGCATCATGGCAGACAGATCCCTGCACCTGGTGGTTCTGATCCTCCT///AGGCCCTGAGAGGCTGCGGTCACGGGGCCCGAGCAATAAAATCATCCATTCCTGCAAAAA
A_73_P116366	0.0149958	0.000389186	up	1.97603	1.97603	0.982604		LB02713.CR_P13 GC_BGC-27 Bos taurus cDNA clone IMAGE:8310783, mRNA sequence [DV889511]	GTTTTCTGTTTTTGCTTTTATAGGATGCTAAGCAGGAGCATTTGTGTGTGTGTGAAAACT
A_73_P485318	0.0158871	0.000442902	up	1.97103	1.97103	0.97895		GB	TTTTTGTCTATGTGTTTCCCAACAGTCAGCCCCTTTGTGCTTATTTGCAGTGATACTCGT
A_73_104162,A_73_P075511|617229	0.00637687	5.34585e-05	up	1.96918	1.96918	0.977596	DNHD1	dynein heavy chain domain 1 [Source:HGNC Symbol;Acc:HGNC:26532] [ENSBTAT00000012193]///dynein heavy chain domain 1 [Source:HGNC Symbol;Acc:HGNC:26532] [ENSBTAT00000019733]	GTCATTCCAGTATGAGAAAAGCCAGGCCTCAGAGTTCCTGCTCAGCAAGCGGCATGCCAT///AGTTCCAGAGATGGGGCTGCTGCTGATTGGACTACAGCTTCACAATGCCAAGTGGGACCC
A_73_P039528,A_73_P409566|618633	0.0294197	0.00155278	up	1.96827	1.96827	0.976925	LOC618633	Bos taurus myeloid-associated differentiation marker-like (LOC618633), mRNA [NM_001103302]	TTGCCAAAGGAATTGCATTGTTTGAGTGTGAGGTGACACATGTGTGTGTTTCTGTGTATC///ATTGCATTGCTTGAGTGTGAGGTGACACGTGTGTGTGTTTCTGTGTACCTGTTGCTTTCT
A_73_P068866,A_73_P436871|514186	0.0492967	0.00418869	up	1.96586	1.96586	0.975159	SYNM	Bos taurus synemin, intermediate filament protein (SYNM), mRNA [NM_001191453]	AAGTGCCTGGCATCTGTTTGAAAGTATAATTGCCTAGGTAAGACACCTAAATGGCAATGG///TACAGAAAGAAAATGAGAGAAATCTGTTTCCACGGCAAAAAGCACCTCCTGCGAGCTTCC
A_73_106156|506661	0.042513	0.00314761	up	1.96535	1.96535	0.974789	GPR6	Bos taurus G protein-coupled receptor 6 (GPR6), mRNA [NM_001100307]	CCCTGTGGCTCCTGTTTTGTGGCTGTTTCCAGTCCAAAGTGCCCTTCCGCTCCAGGTCCC
A_73_P112836	0.022407	0.000914307	up	1.96506	1.96506	0.974574		GB	TGATCACATCATTAAGGTGTCCTCTTGTGCCTCAGCTGGATTCTTGATCCTATCACTGTC
A_73_P083201|541257	0.0214523	0.000835432	up	1.96461	1.96461	0.974245	NR6A1	nuclear receptor subfamily 6 group A member 1 [Source:HGNC Symbol;Acc:HGNC:7985] [ENSBTAT00000052227]	CGTTGCCAGTTGCCTCCACAGCAAGAAGAGTTTTTGTTTGTTTGTCTTGTTTTTTAACCT
A_73_100824	0.00558454	3.4261e-05	up	1.95857	1.95857	0.969804		paired box 5 [Source:HGNC Symbol;Acc:HGNC:8619] [ENSBTAT00000016584]	CTGGGAGTGATTTTTCCGGGAGCCCCTACAGCCACCCTCAGTATCCCTCGTACAACGACT
A_73_105691	0.0266327	0.0013122	up	1.95693	1.95693	0.968594		152660 MARC 4BOV Bos taurus cDNA 5', mRNA sequence [BE664798]	GAGAGAAGTCTTTGCAATAAAAAAGCTCCCCCTTTCCCTTAAAGATGTTGCAGTTTTCCT
A_73_P240945,A_73_P262746,A_73_121412|534497	0.0170188	0.000514375	up	1.95478	1.95478	0.96701	PMP22	Bos taurus peripheral myelin protein 22 (PMP22), mRNA [NM_001101156]	TATAATACATAACAATGCACCGCCTTTATCACGCCCACATTTCCTTATGGTCGGAGCATC///GGGGGGTGGTTAGTGTTGATTGAAGATGTATATAATATCGACGGTTTATAAAACCTATTT///TAGATGTATATACGGGGCCCTTCTGATGCCAAGACTCCAGACCTTGTTTTTTCCCTCTTT
A_73_109162	0.0470115	0.00380068	up	1.95183	1.95183	0.96483		BovGen_25151 normal cattle brain Bos taurus cDNA clone RZPDp1056N121Q 5', mRNA sequence [CO896826]	GCTGATGTGCTTTGCACTCTGCTCTTGTAGATTTATTTTGTTTACAGTAGACTGATGTCA
A_73_P167652,A_73_P046110|512150	0.0147697	0.000376697	up	1.9482	1.9482	0.962142	LOC512150	Bos taurus myeloid-associated differentiation marker-like (LOC512150), mRNA [NM_001104975]	ATCATATGGGACTGTTATAAGCTCAAGGAGATCTTCTTCTATGTGCACACCACGCGATCC///TCTGTCTCCTTCCTGGTTTCTTTGGTTGTTCAATTTCTGTTTTGTCTCTTTCTCTTGCTT
A_73_P048096,A_73_107383|282299	0.00771828	8.79002e-05	up	1.93877	1.93877	0.955144	PAFAH2	Bos taurus platelet activating factor acetylhydrolase 2 (PAFAH2), mRNA [NM_174570]	AAGTATGGCTTCTGCAGTGGAAGAAATGAAGCCAAAGGATGGAGGGAAAATTCCCACCAT///TGAGGTCCTAGCCTCAGAGTGAAGTCAAGCTGTAGACTGAATTTCCGTTTTGTCCCATTT
A_73_P495233	0.0244082	0.0010696	up	1.93128	1.93128	0.949559		Rep: PREDICTED: zinc finger protein 585A isoform 7 - Pan troglodytes, partial (10%) [TC450657]	CCATGAATGCACATTATGGAGTGTTGACCCTGCTCTTCTCACGATTTCCCTTTGATGCTT
A_73_P119576	0.0223346	0.000906175	up	1.9287	1.9287	0.947631		LB0265.CR_K06 GC_BGC-26 Bos taurus cDNA clone IMAGE:8211584, mRNA sequence [DV884712]	ATCAAAATTGTTTTACTAGTAGGTAGCCAAGCTTTATTCCTACCATTTTCTACCCCCCAC
A_73_105553	0.020526	0.000743006	up	1.92827	1.92827	0.947303			CTGGGTCTGTGTCTAGGCTCTGTCTTCCTTTGTTGATCTTTCTGTTCACTCCGTTTCAAA
A_73_P086681|783487	0.0108411	0.000198704	up	1.92779	1.92779	0.946949	ENHO	Bos taurus energy homeostasis associated (ENHO), mRNA [NM_001163653]	GCTGGGCCCCTCCTCTGGTCCTCCTACTGTTTGCTGGATAATAAATGGATCTAAGACTCT
A_73_P137861	0.0149958	0.00038971	up	1.92777	1.92777	0.946935		Rep: PREDICTED: macrophage receptor with collagenous structure - Macaca mulatta, partial (4%) [TC407626]	CCCCATTTTTGTCCCCAGCCACTTTATTATTTAGACCAGTGCTGAGTAGGCTTTCTGTTG
A_73_113436|504839	0.0174093	0.000534691	up	1.92627	1.92627	0.945813	PELI3	Bos taurus pellino E3 ubiquitin protein ligase family member 3 (PELI3), mRNA [NM_001191486]	CGTTCCACGCCGCCTGCCCCTTTTGTGGGGCCTGGCTCACCGGCGAGCATGGCTGCGTCC
A_73_P061736	0.0433381	0.00326815	up	1.92308	1.92308	0.94342		MAS related GPR family member G [Source:HGNC Symbol;Acc:HGNC:24829] [ENSBTAT00000044295]	ATGGTGGGCCGGCAGCCGGGCCGGCGGGAGCCTCTGCGGGTGGTCCTCCGGCGCTCCCTG
A_73_116285,A_73_P038186,A_73_P209012|506097	0.0061136	4.88372e-05	up	1.91528	1.91528	0.937552	NFIL3	Bos taurus nuclear factor, interleukin 3 regulated (NFIL3), mRNA [NM_001075240]	CAGCAGTTGCATTTCTGTCATCAAGCACTCTCCTCAGAGTTCTCTGTCTGATGTTTCAGA///TTATCACTCTGCCTTGTGTATAGTCAAATAGTCCATCGCAAAGACTGTATATATTGAACA///TAATTCTACAGCTGTGTACTTTCAAGACTACCAGACTTCCAAATCCACTGTGAGCGCCTT
A_73_P064796|786156	0.0158551	0.000433791	up	1.91344	1.91344	0.936172	CCL1	C-C motif chemokine ligand 1 [Source:HGNC Symbol;Acc:HGNC:10609] [ENSBTAT00000047653]	ATATATTTAAATTCTAGAATCTTTAAGTTCTGTCCCCCACCCCCTCTGTGCCTCTTAGAC
A_73_101687,A_73_101269|539767	0.0205366	0.00074734	up	1.91334	1.91334	0.936094	RASSF5	Bos taurus Ras association (RalGDS/AF-6) domain family member 5 (RASSF5), mRNA [NM_001113760]	CAACAAGTTCAGGCAGAAACTGGAGGAGGCCTTGAGAAAAGCCCAGGGCAAACCTGCCTA///TCTTGCGCAGTGTGTGCTCTGGGGCTGTTTTCTTCTGAAATGTCTGTCTTATATGGGTTT
A_73_P129396	0.0124406	0.000264629	up	1.91105	1.91105	0.934369			GTGTATGTGTGTGTGTTTTCCCCATTCACCAATTCCTCTTTTATCAGCAAGATGATTTTT
A_73_105533|782104	0.00764637	8.59535e-05	up	1.91077	1.91077	0.934152	MYO15A	myosin XVA [Source:HGNC Symbol;Acc:HGNC:7594] [ENSBTAT00000035016]	TAGCTGCCCCTATGTGGAGGTTGCACTTGGGGATGTCACTGCCCAGCACACCGTGCAGCT
A_73_P148631,A_73_100535|518385	0.0468745	0.00375889	up	1.91038	1.91038	0.933859	ADGRA1	Bos taurus adhesion G protein-coupled receptor A1 (ADGRA1), mRNA [NM_001205846]	TCTTCGTGCTCATCCACCACTGTGCCAAGCGCGACGACGTGTGGCACTGCTGGTGGTCTT///TGCCGCCCCCTTCGGCTCAGACAGCACAGGCAACATCCGCACGGGGCCCTGGAGGAACGA
A_73_P487648|617449	0.0453391	0.0035158	up	1.90916	1.90916	0.932941	CLDN9	PREDICTED: Bos taurus claudin 9 (CLDN9), mRNA [XM_002697935]	TCACCCAAATAGCAGTAGCTCCTTATGCCTTCTCTGGCCTGGAGTTGGCCCTCTCTGCCT
A_73_111696	0.0395372	0.00276006	up	1.90825	1.90825	0.932249		immunoglobin superfamily member 21 [Source:HGNC Symbol;Acc:HGNC:28246] [ENSBTAT00000025516]	TTAAACTATTTCCAGTCTTGTTCTTAGTCCTTTCTGTCCGTGTCTTGGCTCCTTCGGTCA
A_73_P087686|100337226	0.0382658	0.00260128	up	1.90663	1.90663	0.931027	EPHA5	EPH receptor A5 [Source:HGNC Symbol;Acc:HGNC:3389] [ENSBTAT00000039576]	AGAGATTTTCATGGAAAATGGATACAGTTCAATGGACGCTGTGGCTCAGGTGACCTTGGA
A_73_P194377	0.0245644	0.00108861	up	1.90354	1.90354	0.928683			CCCAGCTCCTACTTAGCAGCCGCTCTTCCCAAAGTGAAGAATTCCTTGTCATTTTTGTAA
A_73_111901|529631	0.0461445	0.00363418	up	1.90219	1.90219	0.927661	RUNX1	Bos taurus runt related transcription factor 1 (RUNX1), mRNA [NM_001256578]	CAGCGGCATGACGACCCTCTCAGCCGAGCTTTCCAGTCGACTTTCAACTGCGTCCGACCT
A_73_118683|513844	0.0164221	0.000478089	up	1.89959	1.89959	0.925689	SPON2	Bos taurus spondin 2 (SPON2), mRNA [NM_001046157]	CGAAATACCTCAGACCCAGGGACCCGGGCCCCCGGCCTCGTCAGGGTCCCGTCCCAGCTG
A_73_118605	0.0242484	0.00105058	up	1.89951	1.89951	0.925629		Rep: Protocadherin gamma subfamily A, 10 - Homo sapiens (Human), partial (94%) [TC439274]	TCATACAGAAGTGTCTTGTCAATTTGTGTGCTCTCCTGGTGGCTACATGCTGAAATCCTT
A_73_P091466	0.0225298	0.000926999	up	1.8995	1.8995	0.925619		PREDICTED: Bos taurus antigen WC1.1-like (LOC101907335), mRNA [XM_015463495]	GCCTCAGATATTCTAATTGCCTGTATTTCAATAGAGTAATGCTGACCTGTAATTTTGTCA
A_73_118699|515049	0.0244687	0.00107784	up	1.89896	1.89896	0.925206	NECAB2	Bos taurus N-terminal EF-hand calcium binding protein 2 (NECAB2), mRNA [NM_001098977]	ATACTTCCAAATAAGAGTGTCTCTTCCTGCTGTTCAAAGTGAAGGCGCACCCCTCCCCTG
A_73_116925|104972844	0.0385774	0.00263131	up	1.89735	1.89735	0.923989	LOC104972844	protocadherin gamma subfamily B, 2 [Source:HGNC Symbol;Acc:HGNC:8709] [ENSBTAT00000057448]	TTGGGTGCCAAGTACTAATCATGGAGATGCTGGTGTCCCATTTGCCTCGGATACTATTTT
A_73_P039131|785213	0.0345618	0.0021424	up	1.8972	1.8972	0.923869	MGAT5B	mannosyl (alpha-1,6-)-glycoprotein beta-1,6-N-acetyl-glucosaminyltransferase, isozyme B [Source:HGNC Symbol;Acc:HGNC:24140] [ENSBTAT00000006729]	TTACCTCTTGTCTGTGTTTACTGTTGTCTGCCTCTTTCATCTGGACCATAAGCGCCTTCA
A_73_P125291	0.0153342	0.000405514	up	1.89597	1.89597	0.922935			TGTTTTTTAGTAAACACTGTCGTGCATGTGCTCTTCTCTCCTTCACAGGATCTTTGGCAC
A_73_P490568	0.0101232	0.000176287	up	1.89266	1.89266	0.920416		Rep: Os03g0189900 protein - Oryza sativa subsp. japonica (Rice), partial (6%) [TC450373]	CCCACCTCCTCCATTAAGTCTTCCCTGATCATTTTTGCCTTCAATAATACATTAAAATAA
A_73_P052316,A_73_100476|521163	0.0208853	0.000780084	up	1.88961	1.88961	0.918086	ATP4A	Bos taurus ATPase, H+/K+ exchanging, alpha polypeptide (ATP4A), mRNA [NM_001144089]	GGAGTTCACAGCTCCTATGAGGTGGGTCTCTCCTTAGGACTCCAGGCCAACAAGAGTCTT///CGTGGACCAGGTTAACCGGAAGGATGCCCGTGCCTGTGTGATTAATGGCATGCAGCTGAA
A_73_106933|617971	0.0113225	0.000215293	up	1.88946	1.88946	0.917976	LOC617971	lysine demethylase 4D [Source:HGNC Symbol;Acc:HGNC:25498] [ENSBTAT00000002234]	AAAGGCACTCAAGAGCTGACTGCCCCCATCGGAGCTAAGAGGGGCCTTGCCTTAGACCGC
A_73_P036551,A_73_P150766,A_73_P269341|507138	0.047643	0.00390707	up	1.88841	1.88841	0.917169	IFI27	Bos taurus putative ISG12(a) protein (IFI27), mRNA [NM_001038050]	GGTGACAAGTGCCAAACGCTGCACCCCCAGAGGAAAATGAGAAATAAAAACGAGTTGTGG///TGTCCAAATTTTTGGGCCTGTAACAGTCCCCTGTCGCTCCCTCGGCAGAGAAGAGGACCA///ATTCACCAAGGCTGTCCGCTTAGCCTCTAACCTGGCTTCCAAGATGCTGTCTGCAGGGAG
A_73_P115026	0.0351044	0.00220942	up	1.88752	1.88752	0.916492		TIFA inhibitor [Source:HGNC Symbol;Acc:HGNC:34024] [ENSBTAT00000023475]	TTGTCTGCTGCTTCCATCTCAGCCCCTCGCCTCTGATCTACAGGCTCCGCGCTGAGGAGA
A_73_104589|497208	0.0298065	0.00159484	up	1.88731	1.88731	0.916334	LOC497208	Rep: Dynein heavy chain - Bos taurus (Bovine), partial (4%) [TC420619]	TGCAGCTCACAGTTTCATCAAAATCCCACTGTAACTCAAAAAGCAATTTGGCTGGAGTGT
A_73_P039471	0.0496016	0.00424892	up	1.88413	1.88413	0.913899			ATCTTTTCACGATCTAGGCCCTGCTCTTCTGTGTATCCGAGCCACATTGTATATTCTGCT
A_73_P336691|507126	0.0330015	0.00196427	up	1.87637	1.87637	0.907947	THEMIS2	thymocyte selection associated family member 2 [Source:HGNC Symbol;Acc:HGNC:16839] [ENSBTAT00000008171]	CCTTCCCCTGGCGCTCCCTGACCTAGAAGCCCCAGTATGAGGTCGAAGCCATCATGCACT
A_73_121416	0.0307409	0.00169969	up	1.87584	1.87584	0.90754			TATATACACAAATGCACAGGTCCTTTCCCTAGTCCCTTACCTAACTGTATGTCTCATCAT
A_73_101940|281654	0.0484662	0.00404639	up	1.87578	1.87578	0.90749	CABP2	Bos taurus calcium binding protein 2 (CABP2), mRNA [NM_174255]	CACCAAGCCCCCTTGCCCAGCTCTGTTTCTCTGACAATAAAGCATGTTCGAGCTGGGGGA
A_73_112381|540006	0.0190934	0.000650442	up	1.87547	1.87547	0.907251	ZCCHC12	Bos taurus zinc finger CCHC-type containing 12 (ZCCHC12), mRNA [NM_001076197]	GGTCTACCCTCTGCGTGCCCCCCTTTCCTTGATGCTTTTATTCTCTTTGTGAAAGTTATA
A_73_106874,A_73_P314936,A_73_P446856|516085	0.00952656	0.000154281	up	1.87487	1.87487	0.906793	CYP4A22	Bos taurus cytochrome P450, family 4, subfamily A, polypeptide 22 (CYP4A22), mRNA [NM_001098990]	CATGTGTCAGTCATGTGGCTTCCCCTCTCTTGCTCTCCCTTAATAAAGTTTGCATGTCAA///ATCCAGGACTTTTGTGATTAGATGAACAACTCAGATAAGACAGACTTGTTCTCCTGTCTG///AAGAAAGAGTTCCAAAAGGAGAGTGAGCTGCCACCACTACTGGAAAGGGTAGAGAAATAC
A_73_P232452	0.0279917	0.00143249	up	1.87322	1.87322	0.905522		casein beta [Source:HGNC Symbol;Acc:HGNC:2447] [ENSBTAT00000003409]	CAAAGTGAATGCCCCCTCCTCACTTTTGAATTGACTGCAACTGGAAATATGGCAACTTTT
A_73_104867|539979	0.0212657	0.000815558	up	1.87176	1.87176	0.904397	TESK2	testis-specific kinase 2 [Source:HGNC Symbol;Acc:HGNC:11732] [ENSBTAT00000014930]	GTTCTTTGACCTGCCCAGCAAGTCTGTCATCTCCCTGGTATTTGACCTGGATGCACCAGG
A_73_101865	0.0092621	0.000149114	up	1.86992	1.86992	0.902976		Rep: Transcriptional corepressor Corl2 - Mus musculus (Mouse), partial (76%) [TC399917]	ACTTGTGTGTGGCCCCTTCCTCTCTGGTACTTTGCCTGCTGTATGAATGAAGATTGTATT
A_73_P084206,A_73_107438|512484	0.0404536	0.00286565	up	1.86916	1.86916	0.902392	TYK2	Bos taurus tyrosine kinase 2 (TYK2), mRNA [NM_001113764]	TCATGACCTATGCACCTCCTAATACCATCACTTTGTGTGTGTGTGTGTGTGTGTAAGCAC///ATGCTGCCTTGTAGGACTAATGTAAAGAGCTAGTAAGGTCATCAAATGCTTAGCAGATAT
A_73_P309636,A_73_P031451|512125	0.00900926	0.000135894	up	1.86819	1.86819	0.901643	MAPK15	Bos taurus mitogen-activated protein kinase 15 (MAPK15), mRNA [NM_001046110]	AGAAAATCTTTGATGCCTTCAAGGATAAGACAGATGCCCAGAGGACGTTCCGGGAAATCA///GGGACTCGCTGAGGTTCACACCCCAACCTCCATCACTTCCTCCAATAAAGTTCTATCTGT
A_73_115811,A_73_P046831|508044	0.0142243	0.000349438	up	1.86647	1.86647	0.900313	IL22RA1	Bos taurus interleukin 22 receptor subunit alpha 1 (IL22RA1), mRNA [NM_001034311]	AGTCCCTCGTGTGTCCCAGTGATGAGGATCCAGTGTCCAAGACTGAGGCCGAGAGCCCAG///ATCATGTCTGTAAAGTGTTTCACAGTGCCTGGCACATGGGCCATGCCCAATAAACTAGTA
A_73_P101696,A_73_P032436|280713	0.0332917	0.00200292	up	1.8643	1.8643	0.898635	ADM	Bos taurus adrenomedullin (ADM), mRNA [NM_173888]	AAATGGAATAAGTGGGCTCTAAGTCGTGGAAAAAGAGAACTTCGCGAGTCCAGTAGCTAC///AGTTGCCTCTTGTGGAAGAAGAAAACACCGTGTCTGTATAATCTATTTACATAAAGTGGG
A_73_P279256	0.0297101	0.0015843	up	1.8615	1.8615	0.896468		Rep: Zinc finger protein 462 - Homo sapiens (Human), partial (70%) [TC436313]	GTGGACATGTGTGTGTGTGCAAGTCGTTTGGTTTTCATGTTTCTTTTTGTTTTTGTTTTT
A_73_P488038|100847250	0.0279917	0.0014304	up	1.86108	1.86108	0.89614	LOC100847250	PREDICTED: Bos taurus major allergen I polypeptide chain 2-like (LOC100847250), mRNA [XM_003582892]	TATAAATTGTCCTCGGTGGTGAATGCTGTTAGAGGATTGGCTTCCAGTCTGCTCTCTTTG
A_73_119309	0.0181747	0.000592123	up	1.8579	1.8579	0.893672			CTGCCTCATGCCCCTCTTGAGCACTGATGATAATAAACTCCCCTGTTGTTGCTCCCCTAA
A_73_P067671|538483	0.00958992	0.000156403	up	1.8558	1.8558	0.892044	CIC	PREDICTED: Bos taurus capicua transcriptional repressor (CIC), transcript variant X4, mRNA [XM_005219390]	TCTCGTTTTGAGTTTGACGAGTGCGAAGCAGCGGTGATGCTGGTGTCCCTGGGCAGTTCT
A_73_P336676,A_73_100446|505879	0.0120321	0.000251709	up	1.85332	1.85332	0.890115	KCNF1	Bos taurus potassium voltage-gated channel modifier subfamily F member 1 (KCNF1), mRNA [NM_001097987]	TTCTCTTCGCCCAACAAGCTGCACTTCGCCCTGTCCTTCATGAACATCGTGGACGTGCTG///AGAACTCTGGAGGCCCCCTTGGGCACCTCTGATGAGTCTGGGGTAAGATTCCCTTTGTGT
A_73_P034196|516158	0.0238215	0.0010103	up	1.84438	1.84438	0.883139	LYNX1	Bos taurus Ly6/neurotoxin 1 (LYNX1), mRNA [NM_001046221]	CCACCCTGAGGTCTGCTTCCCGTTTGTGATCTGGTTTCCTAAAGGCTGATGTGGGACTAC
A_73_118546	0.0412059	0.00296918	up	1.84259	1.84259	0.881734		Rep: Flagelliform silk protein - Argiope trifasciata (Banded garden spider), partial (5%) [TC485701]	TTTTTTGGGGCTTTATTTTCGTTTGGCCGGGGGTTTTTGGTTTTCCCCTCCACCCTGGGC
A_73_P206447	0.0354706	0.0022564	up	1.84255	1.84255	0.881703		Hw_liver_56_050812_E04 Bos taurus CF-24-HW liver cDNA library Bos taurus cDNA, mRNA sequence [DV786012]	TCGGTATAGCCTCCCCTCGTATAAAATCTGTCATACTTCACGCCATGTCTACTATGATGA
A_73_P041646,A_73_P403491|526978	0.0131626	0.000299436	up	1.84185	1.84185	0.881158	MANEAL	Bos taurus mannosidase endo-alpha like (MANEAL), mRNA [NM_001102105]	CTCACTAGAGCCGTTTTCAGTGCTACTGTGATTTGTATTAAATATGACGTGTTGTTCCTA///ATTTTACCGCTACAAGAACAGCATGGGTAAGAGCCTCCCGCTCTTTTATATCTACGACTC
A_73_116014|282104	0.0139492	0.000336995	up	1.84109	1.84109	0.88056	TUFT1	Bos taurus tuftelin 1 (TUFT1), mRNA [NM_174479]	GTCCTTCCAGTTCTGATACTCTTTCCCATGGCATATTCTTTGTATGGTGAGTTTAATAAA
A_73_102141|512578	0.0366489	0.00238665	up	1.83985	1.83985	0.87959	KCTD15	Bos taurus potassium channel tetramerization domain containing 15 (KCTD15), mRNA [NM_001075568]	AGATGCTGATGTACAATTGTCGTGTGTTTGTGTAAACACATTATGTTCCTAGTTCATGCC
A_73_P063831	0.0337888	0.00204975	up	1.83416	1.83416	0.875118		Rep: Glutamate receptor-interacting protein 2 (GRIP2 protein). - Bos Taurus, partial (7%) [TC406167]	TCTGGGCCTGTTCCAGTGACATCGAGGTCTTTCTCCAACTGGACCTCTGAGATGTGCCAG
A_73_120566|617313	0.0449058	0.00346202	up	1.83397	1.83397	0.874971	LOC617313	Rep: Granzyme H precursor - Homo sapiens (Human), partial (54%) [TC446621]	ACCCAAGGAAGGTGAAAACCGGCTTCAAGGGTGACTCCGGTGGACCCCTCGTGTGTAAAA
A_73_107556,A_73_P134301|510745	0.0484176	0.0040368	up	1.83391	1.83391	0.874927	ABCG1	Bos taurus ATP-binding cassette, sub-family G (WHITE), member 1 (ABCG1), mRNA [NM_001205528]///PREDICTED: Bos taurus ATP binding cassette subfamily G member 1 (ABCG1), transcript variant X2, mRNA [XM_015473650]	TGTGCTCCTCTTCTCAGGGTTCTTCGTCAGCTTTGACACGATCCCCACCTACTTGCAGGG///TAACCTGGAATCAGGGTCTCCGAGTGAATCTGCTTTTTTGTTGTATGGAAGTTTGATAAA
A_73_119425	0.0468745	0.00377265	up	1.83192	1.83192	0.873355		PREDICTED: Bos taurus ArfGAP with GTPase domain, ankyrin repeat and PH domain 3 (AGAP3), mRNA [XM_868297]	TATGTTTGTGTACATACTGGTGTGTGTGTGTGTGATGAGCCAATAAACCAAACCGTGTGT
A_73_P346761,A_73_P051206|527239	0.0423474	0.00312562	up	1.82763	1.82763	0.869976	JAKMIP2	Bos taurus janus kinase and microtubule interacting protein 2 (JAKMIP2), mRNA [NM_001075897]	AACATCATCCATGGCCTCATTTAGAACAGACCGAACACCAGCTACTCCTGATGATGACTT///TGGGGATCGAAGCACGAGGAATACCTATGAGGAGCTGTTTACAATAAAATGTTTGATTTG
A_73_110938	0.011456	0.000218831	up	1.82751	1.82751	0.86988		GB	TTATTATGGCTATCATTTGCATGGGATCTGGAGAGGGTCGCCGAAAAGCTTTTGCTACCT
A_73_P089866	0.0253331	0.0011698	up	1.82689	1.82689	0.869391			AATGACTTTCTCGTGATGCTGTATTAAATATGAGATGAAGCCTCAGATATTCGAATTGCC
A_73_P217137|533883	0.0470755	0.00381548	up	1.82677	1.82677	0.869296	KIAA1671	KIAA1671 [Source:HGNC Symbol;Acc:HGNC:29345] [ENSBTAT00000061095]	AGAGGATGCCTGTGTTTCCCGGCGTGGACCCGGCTGCACTGAAGGCTCAGCTGTACAAGA
A_73_P047651|535288	0.0124406	0.000268147	up	1.82541	1.82541	0.86822	ZNRD1	Bos taurus zinc ribbon domain containing 1 (ZNRD1), mRNA [NM_001046400]	ATCGTCATGTGTGGATTACCATTGTCCCCAGAGTACTCCTACCCTCATTGAGTTTCCTTA
A_73_118484,A_73_P104066,A_73_P069766,A_73_P330406,A_73_P348881|514739	0.0180169	0.000578069	up	1.82201	1.82201	0.865534	MAP1B	Bos taurus microtubule-associated protein 1B (MAP1B), mRNA [NM_001206119]	GTGTGCAATATCCCCTCTTCCATTGAGGATATTTGATGTAAAAGAAAAAAGAATCAGTTC///TGAAAAAAGACAAACCTGTGAAAACCGAGACCAAACCTCCAGTGACAGAAAAGGAGACGC///CTCAACATCATGGTTTTAGCAAGCAGCAGCACAGTGGTTATGCAAGATGAATCCTTCCCT///AAACAAGTAAAACTGAAACAGAGGGCTGACAGCCGTGAGAGTTTGAAACCAGCCGCAAAA///AAAGTTTTGTCTCCATTACGGAGCCCTCCCCTAATTGGATCCGAGTCTGCATATGAAAGT
A_73_119093,A_73_P211197|282083	0.0352962	0.00223131	up	1.82118	1.82118	0.864871	SSTR2	Bos taurus somatostatin receptor 2 (SSTR2), mRNA [NM_174467]	TGTCCGACAACTTCAAGAAGAGCTTCCAGAACGTCCTCTGCTTGGTCAAGGTGAGCGGCA///CGTGGCTGTATGGGGTGTCTCTCTGCTGGTCATCTTGCCCATCATGATATATGCTGGCCT
A_73_P079576|523062	0.0482156	0.0040068	up	1.82046	1.82046	0.864307	LOC523062	olfactory receptor family 4 subfamily Q member 2 (gene/pseudogene) [Source:HGNC Symbol;Acc:HGNC:15359] [ENSBTAT00000006327]	ATGTTATTACTCCCATGCTGAACCCCCTCATCTACACACTTCGGAACAAAGAGGTCAAGT
A_73_104288|506056	0.0218853	0.000865638	up	1.81801	1.81801	0.862358	EID1	Bos taurus EP300 interacting inhibitor of differentiation 1 (EID1), mRNA [NM_001098377]	TGAAGTTTCCCTCTGTCTCCTCCTCTAATTAAGCTTGTTTTTGGTTATGCACCAGCATTC
A_73_P130601	0.0136808	0.000321127	up	1.81739	1.81739	0.861868		bend_0A02-003-b06 Day 8 Uterus bend Bos taurus cDNA 3', mRNA sequence [CK727899]	TTCTGCAGCGACAGTTTCTAACTAACCAGACGTTTAAAGCCCCTCCCTCTAGAATATCTG
A_73_106899|613918	0.0372406	0.00246066	up	1.81687	1.81687	0.861456	FAM155B	family with sequence similarity 155 member B [Source:HGNC Symbol;Acc:HGNC:30701] [ENSBTAT00000045942]	TCTACATCCTTGTCCTCGTGCTCCTGCATACCATGGTGTCCTTCTCCAGCAGCCAGAGTG
A_73_P228517,A_73_P032611|539564	0.00568592	3.6554e-05	up	1.81262	1.81262	0.858078	PGBD1	Bos taurus piggyBac transposable element derived 1 (PGBD1), mRNA [NM_001076174]	AACTTTTGGTCTGTTAGCAGTTAAGACACTCATTCACCGAGTGCCCCCTGTATTCCAAGT///GAGATACCTTTTATCTCTAAACACTTCAGTGTGTTTCTGAAGAAGAAAGACAGTCTTTTG
A_73_120610	0.00568592	3.63488e-05	up	1.81182	1.81182	0.857442		LB0289.CR_G20 GC_BGC-28 Bos taurus cDNA clone IMAGE:8223022, mRNA sequence [DV915946]	GCATCTGTGTTCTGGGCCTCATCTTGACTCTGCCCAGATCGCTCTAATTTTATACACAAA
A_73_110678	0.0425776	0.00315729	up	1.81009	1.81009	0.85606			GACTGCTGCCTTCTGGTTTCCTCTTTTTCTTTTAAGAATATGAAAGATTTTTGTAATTAA
A_73_P153066|618071	0.0419752	0.003071	up	1.80909	1.80909	0.855263	LOC618071	Bos taurus uncharacterized LOC618071 (LOC618071), mRNA [NM_001206718]	TAAATTCTGTACGACCCCCGGTCAACTCTCTCTTCTCGCAGCTCTGGTCCCAAGGCTGGT
A_73_P084606|538519	0.0119746	0.000240113	up	1.80889	1.80889	0.855108	MKNK2	Bos taurus MAP kinase interacting serine/threonine kinase 2 (MKNK2), mRNA [NM_001205275]	TCTGTACATAGGCCTTCCCCACCCGTCAGATCTAAAAAGATTTTTTAAGCTATTGCCCGC
A_73_104714|510276	0.0235322	0.000989065	up	1.80807	1.80807	0.854452	RASSF1	Bos taurus Ras association domain family member 1 (RASSF1), mRNA [NM_001075442]	TGGGGGTGATAGTCATCAGGGCCTGGGGTCTGAGAGAAATGGCTAAATAAAGATTTAAGA
A_73_116713	0.0248958	0.00111438	up	1.80794	1.80794	0.854343		Rep: Rho guanine nucleotide exchange factor 15 (Vsm-RhoGEF). - Canis familiaris, complete [TC404864]	TGGGAAGTATTAGATTCCATTCCTGAGGTGCCTCCTGTATCCTCTTAAGCCACTTCCTTT
A_73_P114561	0.0415777	0.00300865	up	1.80759	1.80759	0.854068		Rep: Regulator of G-protein signaling 6 (RGS6) (S914). - Takifugu rubripes, partial (4%) [TC476389]	ACTCGCAGTGTGGTAAGTTCAGCTGGTTTTCTTTGGTTTTTTGGCTTTCTTTCCGTTTTT
A_73_P061040,A_73_P489287|511657	0.0463038	0.00366118	up	1.80664	1.80664	0.85331	LOC511657	Rep: olfactory receptor Olr1231 - Rattus norvegicus, partial (97%) [TC397834]	TACCATCTCATATGTGGGGTGCATGACTCAGCTGTTTTTCTTTCTCTTTTTTGTCATCTC///GTGGGGTGCATGACTCAGCTGTTTTTCTTTTTCTTTTTTGTCATCTCTGAGTGCTATATG
A_73_P035406,A_73_P503963,A_73_P244825|617530	0.043793	0.00332081	up	1.80603	1.80603	0.852824	CEBPG	Bos taurus CCAAT/enhancer binding protein gamma (CEBPG), mRNA [NM_001034801]	GCCCTGAAGAGCTGATTAGCTAAAAATGTTAGACGTGTAACTTGAATATCTGGTTTTAAA///TACTGAAAGATTTGTTTCTTGAGCACGCACACAACCTCGCAGATAACGTGCAACCCAGTA///ATAACGTGCAACCCAGTAGCACTGAAAATACGACAAATCCTGACAAGGCAGGACAGTAGA
A_73_P036856|617299	0.0311635	0.00174848	up	1.80384	1.80384	0.851069	OTOF	Bos taurus otoferlin (OTOF), mRNA [NM_001144107]	ACTGCTCATGCTGGCGCTCTTCCTCTACAGCCTCCCCGGTTACATGGTCAAGAAGCTCTT
A_73_110333|506482	0.0272913	0.00136654	up	1.80209	1.80209	0.84967	RAB25	Bos taurus RAB25, member RAS oncogene family (RAB25), mRNA [NM_001017936]	AGATCTCTATTATCGGTCCCCCTCTTACAGACTACGGCCCTCCAATAAAGCTGTGTTTTA
A_73_P108491,A_73_P108486,A_73_104879|281032	0.00540712	2.61672e-05	up	1.80004	1.80004	0.84803	BTG1	Bos taurus BTG anti-proliferation factor 1 (BTG1), mRNA [NM_173999]	ATCAGGTTACCGTTGTATTCGCATCAACCATAAAATGGATCCTCTGATTGGACAGGCAGC///AGGCCGCCGTGGCTCGTTTCTTCCACTTTCCTGCCGCCTCCTGTGTCGAAAATAACTTTT///GTAACTCTCCTTGTACTTAATTGGGTTAAAAGTCTTTTCCACAAACCACCATCTATTTTG
A_73_P167187,A_73_P371636,A_73_P078676|523477	0.0287435	0.00149725	up	1.79953	1.79953	0.847624	SCML2	Bos taurus sex comb on midleg like 2 (Drosophila) (SCML2), mRNA [NM_001192580]	GTGATACAGTTTATGAAACATAAAGATCCTCAGAAGTCAGGCCCCCTTGCTGACCTCTTC///AATGACTTTTGGCGGCTTGTTGATTCTCCAGACATACAGCCTGTTGGGACATGTGAAAAG///GGGACTGAAATTGGGGCCAGCCTTAAAGTTATGTTATTATATTGAAAAACTTAAAGAAGG
A_73_105575,A_73_P043051|616608	0.0223024	0.00089989	up	1.79863	1.79863	0.846895	DNAJC5G	Bos taurus DnaJ heat shock protein family (Hsp40) member C5 gamma (DNAJC5G), mRNA [NM_001076429]	ATAGTTGTTGGTTCAAGACACTTGTCCTCCTGTGTGCTCTACTCACCTGTTGCTGTTGTT///CTCTCCTGACTGGGAGAAGGGCTAAGGAATATCAGTCAATAAAAGAGCTTTTTAAAATCC
A_73_P086591,A_73_P465453,A_73_P327421|614496	0.00795002	9.51228e-05	up	1.79805	1.79805	0.846434	R3HCC1	R3H domain and coiled-coil containing 1 [Source:HGNC Symbol;Acc:HGNC:27329] [ENSBTAT00000036540]///R3H domain and coiled-coil containing 1 [Source:HGNC Symbol;Acc:HGNC:27329] [ENSBTAT00000036539]	CGTGGTGGGCTTTAGTTTGGTCTAGTTTCTGAAGCTGAGTAAAAAATAAAAATTGAAGAA///AGGAGGACGGTCATCTGTCACCTGGACATCAGGTTACCCAGTTCAGACGGATTCTCTGGC///TCTCTGAGTTCCAAGAGAAGGGGTTCAAGATCCAGTGGGTGGACGACACGCATGCACTCG
A_73_P102796,A_73_P137086,A_73_106624|414347	0.00524479	2.37621e-05	up	1.79741	1.79741	0.845916	CCL4	Bos taurus chemokine (C-C motif) ligand 4 (CCL4), mRNA [NM_001075147]///LB02738.CR.1_B23 GC_BGC-27 Bos taurus cDNA clone IMAGE:8623993 5', mRNA sequence [EH207464]	CCTCTCCATGCTCACGACTCCCCTCAGCAGATCCTGTTCCTTCTCTTAATTTAATTTTTT///TAGAAGCTAAAACGAAGAGCTCCTTGTAGAACTTCGGTCTTACCTTGGCCTTTCTTTCCA///TCCCTCTGCTACTGTGAATACATGGATAATGCAACTGATTTCAAGTGTTTTTGTAATAAA
A_73_108132|281153	0.0158871	0.000439438	up	1.79701	1.79701	0.845599	FATE1	Bos taurus fetal and adult testis expressed 1 (FATE1), mRNA [NM_174052]	CTTGGCTGTGTCTTCCCTGTTTTCTTCAATGTTGTGCTCAGGGCTCTGCACATAGAATAT
A_73_P252881,A_73_P252266,A_73_P033631|509107	0.0234557	0.000984957	up	1.79559	1.79559	0.844461	ATF4	Bos taurus activating transcription factor 4 (ATF4), mRNA [NM_001034342]	TTTTGATATCCTGTTCAGTAAAGATGACCTGGAAACCATGCCAGATGAGCTCTTGGCCAC///TAAAAGAGGAGGATGCCCCCTCAAATAATGAAAGTGGCATCTGTATGAACCCTGACTCCT///GGGTAGTCAGGAGTATGTGCGCTTGTATATAGAAGGCTGAAGCTGTGTTTTAATAAATTA
A_73_P046926|615505	0.0255619	0.00119268	up	1.79504	1.79504	0.844017	TMEM176B	Bos taurus transmembrane protein 176B (TMEM176B), mRNA [NM_001099145]	TCTTCCATTCAGTGAACAGGTATTGTCACGTTTCCCCCAGTGCTGACTAAACAGAAGCAA
A_73_P189462,A_73_P352086,A_73_P097411,A_73_P084791|539804	0.00524479	2.32509e-05	up	1.79025	1.79025	0.840165	TRIM7	Bos taurus tripartite motif containing 7 (TRIM7), mRNA [NM_001205446]	ACAGAAGCAATTAACTCCAATTAATGGAAATGTGCAGGGCACAGGCATACCCCTGACAGT///TCTGTCTGCTCTACCGGCACCTACTTGCGAATCTGGCCTTGAGAGTCATTGTCCAGCCTC///CTGTTCACTGCTTAGTATGCTCCTGGAAAAGAGGATGGAAATACAGACTGTGAGCTCAAA///ATGCTTCCCTCAAGACCTTTGTCTTAAAGGGGCTGCTCAAGAAGTTCAAAGAGGATCTTC
A_73_P066301	0.0448036	0.00344545	up	1.7893	1.7893	0.839399		PREDICTED: Bos taurus notum pectinacetylesterase homolog (Drosophila) (NOTUM), mRNA [XM_604035]	TTTGGCTACAAAGTCTACCCAACTCTGCGCTGCCCGGTGTTCGTGGTGCAGTGGCTGTTT
A_73_119203	0.00594292	4.03421e-05	up	1.78837	1.78837	0.838649		Rep: Amiloride-sensitive cation channel 4 - Mus musculus (Mouse), partial (24%) [TC442600]	GGCCTCTCTGCTTCCGATCTGGTTTTATAAAGTGCTGACAAAATTGGGAATAAAGAGGTA
A_73_P158932	0.0174427	0.000540809	up	1.78402	1.78402	0.835132		LB00528.CR_D18 GC_BGC-05 Bos taurus cDNA clone IMAGE:8017988, mRNA sequence [DT856843]	TTTTCCCCTTCCTCTTCCTCTAGTGTTTGGGGTCATCTCTCAAGTAAATTGCTTGCATTC
A_73_108581,A_73_P384886|515029	0.0468745	0.00377954	up	1.783	1.783	0.834306	UPP1	Bos taurus uridine phosphorylase 1 (UPP1), mRNA [NM_001098976]	CAGCGGCTAGTAGGCCAATTCATCAAGAAGCGCCTGATGCAGGCCTGATCCCCCAACATT///ATGGGCGTCCCCTCCATCGCTATCATGCTGCATGAGCTCATCAAGCTGCTGTACCATGCT
A_73_P110246|508420	0.0248958	0.00111536	up	1.78194	1.78194	0.83345	LOC508420	GB	TTGAGAACTTTGCTTTTGCTTGCTGCATCATCATGCTGTTTCTTCCCTTCTCCATTATCG
A_73_P489323,A_73_P105371|783509	0.0209322	0.000792046	up	1.77904	1.77904	0.831102	LOC783509	Rep: Sodium- and chloride-dependent creatine transporter 1 - Rattus norvegicus (Rat), partial (3%) [TC414461]	TCCATCGTCTTCTGTCTGGAGCAGCTTTCCCTGGTGATTCGGTCCTTGCAGCACTTTGGG///GTCTACATAGTTGTTTGGTGATTGTTAACTGCGGAAAATAAAACTGAGCTTTTGTGCAAA
A_73_P094456,A_73_112914|534542	0.039401	0.00273827	up	1.7771	1.7771	0.829524	KCNH7	potassium voltage-gated channel subfamily H member 7 [Source:HGNC Symbol;Acc:HGNC:18863] [ENSBTAT00000002469]///PREDICTED: Bos taurus potassium channel, voltage gated eag related subfamily H, member 7 (KCNH7), transcript variant X1, mRNA [XM_015462278]	ACAGATTCATCCCTAAGCACTGTAGGAGTCTTGGGTCTTCATAGGCATGTTTCTGATCCT///CCTTCCAAGCAGGAAAGCAGAGGATAAAATTGTTCATGGATGCAACTCAGATGATCCTCA
A_73_110808	0.0112533	0.00021312	up	1.77662	1.77662	0.829137		Rep: Relaxin receptor 2 - Canis familiaris (Dog), partial (25%) [TC480996]	CCCTTCGCATCTGGTCCCCTCATCTAAGGAAAGAAAATAAGCTCTGTCATCCTTTCTTTT
A_73_103864|508059	0.0222309	0.000888795	up	1.77392	1.77392	0.826938	CPNE6	Bos taurus copine 6 (CPNE6), mRNA [NM_001045990]	CTCAGCCTCATGTCCCCTCAGTGATTTTCTTCAGTGATCCTGACTTTCTGGCCATTAATA
A_73_P435751,A_73_106928,A_73_P440781|517588	0.0267498	0.00132706	up	1.77285	1.77285	0.826067	GLI1	Bos taurus GLI family zinc finger 1 (GLI1), mRNA [NM_001099000]	TCTTCCTGCACCTCCCTGGAGAAGCCGAGCTGAGTATCCAGGATACAACCCCAATGTAGG///ACACAGTCTAAATATATTTGGGGAGGAATTTTATAATGACACTGTTTCCTGATAATAAAG///TCATTCTACAGGACACCTCAAGGCGCAGCTTGTGTGTAATTATGTTCAGTCTCAACAGGA
A_73_P363206,A_73_119723,A_73_P439236|532684	0.00796127	9.5864e-05	up	1.77232	1.77232	0.825638	LOXL2	Bos taurus lysyl oxidase like 2 (LOXL2), mRNA [NM_001099053]	ACTTCAGTGGACTCATAAATAACCAGGTCTCCAAGCGGTAAAGTGGCAACATGGTCATCT///ACGCTCACCGATCGCCATGTGTCATCACGGACACTTACACATACTTGAAACTACGAATAA///GGTTCATGAGCCACCCCAGCCCACGGCTTCCTAAACTTGGGAGTTCGCTTTCTTCAACCA
A_73_108761|540044	0.0489192	0.00411684	up	1.77198	1.77198	0.82536	GPR84	Bos taurus G protein-coupled receptor 84 (GPR84), mRNA [NM_001038568]	TGGGGCGCTATCTCCTCATTGCCCACCCTAAGCTCTTTCCCCAAGTTTTCAGTGCCAAGG
A_73_117129,A_73_P050336|505865	0.025114	0.00114359	up	1.7716	1.7716	0.825054	FOLH1B	Bos taurus folate hydrolase 1B (FOLH1B), mRNA [NM_001101858]	TGCAGGCTGCAGCAGGGACTCTGAGAGAAGTCGCCTAAGAAATTTCTTTGTAAAATGCAT///GTACTGCTGACCATATGCCTTCCCCTTCTTTCAGAGATACTCACTTTCTTGAATTTTATG
A_73_118307|509290	0.0406923	0.00290563	up	1.77057	1.77057	0.824211	PPP2R2B	Bos taurus protein phosphatase 2 regulatory subunit Bbeta (PPP2R2B), transcript variant 1, mRNA [NM_001272085]	TATTGCCCCGTTTTCTCTGGTGGGTCCAGTGTTTTGTTTCTAGGTGTCTGCTGAGATAAA
A_73_P092281,A_73_120379,A_73_P104981,A_73_P104976|505940	0.0208587	0.000775754	up	1.77008	1.77008	0.823818	ARHGEF2	Bos taurus Rho/Rac guanine nucleotide exchange factor (GEF) 2 (ARHGEF2), mRNA [NM_001098881]///Rep: MGC152523 protein - Bos taurus (Bovine), complete [TC428068]	TAGTCCACGAGATTTCACCCGAATGCAGGACATCCCGGAAGAGACTGAGAGCCGAGATGG///TGTTGTCTGTGATACTCACAAGGATAAAAATGAAGGGACACTTAGGTTCCAGCAGCTGTT///CGTAGGCAGTGGGCCATTATTTGGATTGTATTGTCTTTTACCTTCATTTTCTAAAAATGA///TATGCACAGGTTCAGCATCCATGGATTCAACCAAGCATGGGTCAAAAATACTCGAAAAAA
A_73_105892	0.0357732	0.00230024	up	1.76733	1.76733	0.821574			TGGTTTTCGGACTCTGCTGGCGCCTGTTCACCTTGTGCTGTTGGTGGACGTTTGGCTGAT
A_73_P089421|107132447	0.0290754	0.00152433	up	1.76366	1.76366	0.818576	LOC107132447	Rep: Transient receptor potential cation channel subfamily V member 6 (TrpV6) (Epithelial calcium channel 2) (ECaC2) (Calcium transport protein 1) (CaT1). - Rattus norvegicus, partial (67%) [TC398946]	TTGTTTTAACCCCTTTCCTGAGCCCTTTCATCTTCACTCTCCGGAATGACAAAGTCAAAG
A_73_P037306,A_73_115098|509772	0.0374973	0.00250271	up	1.76348	1.76348	0.818425	HPCA	Bos taurus hippocalcin (HPCA), mRNA [NM_001025328]	GCCCACGTGGAGCATCTCTGTTCTTTTTAATGACTTCAGAATAAAGTCTCCTTTCAGTGC///AAATGGACACAAACAACGACGGCAAGCTGTCCCTGGAGGAGTTCATCCGCGGGGCCAAAA
A_73_107840	0.0119746	0.000240924	up	1.76341	1.76341	0.818368		Rep: PAOX protein - Bos taurus (Bovine), partial (9%) [TC422434]	GTGTGTGTATTCTGCTCCTTCCAGCTTTATGTTTGTGTGGTCAATATCTGTTTACATTCA
A_73_P149806,A_73_P083266|615907	0.019614	0.000684703	up	1.76327	1.76327	0.818256	FAM102A	Bos taurus family with sequence similarity 102 member A (FAM102A), mRNA [NM_001193094]	ACTGTGAATATTCTCCCCTGAACCACTAGAGGGCAGGACACATGGGCCCGTGAAGCAGGT///TCCATCCTCAAGGTCACCATTGGAATGTTCCTGCTCTCGGGAGACCCCTGCTTCAAGACG
A_73_P061091	0.0308814	0.00171617	up	1.76078	1.76078	0.816215		Myb/SANT DNA binding domain containing 2 [Source:HGNC Symbol;Acc:HGNC:26266] [ENSBTAT00000061519]	TAAAAATCCCGAAGATGGAGGTGCTCTCCCCGGCTTCTCCTGGTGGCCTGAGCGACGGAA
A_73_P087916,A_73_105168,A_73_P272036|519739	0.0387009	0.00265231	up	1.75871	1.75871	0.814516	GPAT3	Bos taurus 1-acylglycerol-3-phosphate O-acyltransferase 9 (AGPAT9), mRNA [NM_001192514]	GAATTACAGCAAAATGATTGTGGGCAATGGATCTCTCAAGTCGGAACTGGACTGAATGCC///TCAGAGTGTTATTTCTCTTCTGGGAACCATGTACAAAATGTGACACTGTCTTACGGTGAA///CTCTTCTGGGAACCATGTACAAAATGTGACACTGTCTTACGGTGAATATAAATAAATTCA
A_73_P245286,A_73_107607|514688	0.0492967	0.00419507	up	1.75829	1.75829	0.814171	PPP1R15A	Bos taurus protein phosphatase 1 regulatory subunit 15A (PPP1R15A), mRNA [NM_001046178]	TATCGACCAGGAGAAGACACGGAGGAAGAAGATGAGTATGAGGACGAAGATAATGAATCA///GTAGTTTTTGTGTTAACTATTTATTTATTTGAATGTAGGTTTATATAATAAATAAAGCTT
A_73_P382521,A_73_103443|504652	0.0293654	0.00154755	up	1.75777	1.75777	0.813743	TK1	Bos taurus thymidine kinase 1 (TK1), mRNA [NM_001097572]	ATCGGAGGAGCAGACAAGTACCACTCCGTGTGCCGCCTATGCTAATTCAAGAAGGCCTCG///GCTTGTCTTCTAAGGAGGTGGGGGCTGTGTGTGTGTGTGGAACTGGTAACTAATATTAAA
A_73_117923,A_73_P102486|282857	0.0332917	0.0020048	up	1.75621	1.75621	0.812468	SNCA	Bos taurus synuclein alpha (SNCA), mRNA [NM_001034041]	ATTTCGGTGCTTCCCTCTCACTGAATAAATGGTAGCAGGGTCTTTGTGTGCTGTGGATAT///GTCATGACATTTTTCTCAAAGTTTTCACAGTGTGTTTTGAAGTCTTCCATCAGCAGTGAT
A_73_117947|518931	0.0205681	0.000753188	up	1.75575	1.75575	0.812091	LGALS12	galectin 12 [Source:HGNC Symbol;Acc:HGNC:15788] [ENSBTAT00000009351]	GAAGAAGCTGATCTTGGCCCCCTTCCTCTTCTACCCCCAGCGATTCTTTGAGGTGCTGCT
A_73_P093561,A_73_P038681,A_73_P108469,A_73_103477|282368	0.0125028	0.000270304	up	1.75461	1.75461	0.811154	SLC6A9	Bos taurus solute carrier family 6 (neurotransmitter transporter, glycine), member 9 (SLC6A9), transcript variant 2, mRNA [NM_001242342]	TATCATGTGTGTGTCCATCATGTACATTTACGGGCACCAGAACTACTTCCAGGACATCCA///CGCACCACTAGGATTTTAAAGTCCATAGGTTTTAATGAAATTTCTATTCCTGTCTCTGTA///TAACCCTTGGAACACGCCCGACTGCATGAGTGTGCTGGATAACCCCAACATCACCAACGG///TCTGTAGCAATAATGGTGTGCCTCCCACCCCCGACCATCCGCGCACCACTAGGATTTTAA
A_73_119248|530785	0.0268238	0.00133695	up	1.75286	1.75286	0.809709	INHBC	Bos taurus inhibin beta C subunit (INHBC), mRNA [NM_001205983]	TCCGGCGCCCCCTCTCTCTGCTCTACTATGACAGGGACAGCAACATTGTCAAGACTGACA
A_73_P488818	0.0090815	0.000140677	up	1.75137	1.75137	0.808481		Rep: MGC139945 protein - Bos taurus (Bovine), partial (91%) [TC425242]	GTGCTATCAAGCCTCCCCCTGTTCTACCTCCTCATGTTGCCAGCAGTCCAGCTGCCAGTC
A_73_119259	0.0272735	0.00136391	up	1.74993	1.74993	0.807301		Rep: Uncharacterized protein C11orf81 - Homo sapiens (Human), partial (27%) [TC484683]	CGCTCTCTGCTCCCTGTCCTGTCCCCTTCTTTTGTATTTGGAAACAAACGTGTTGTAATA
A_73_110013|506944	0.0477945	0.00393385	up	1.74984	1.74984	0.807221	SFT2D2	Bos taurus SFT2 domain containing 2 (SFT2D2), mRNA [NM_001192122]	ATGAGGTAGAAAAGCACTTTCTGATGATGTGTGTTGTTTTTAAACCTGAACAGCTGTCTT
A_73_P423986,A_73_P035911|540990	0.0150336	0.000391264	up	1.74982	1.74982	0.807206	LCP1	Bos taurus lymphocyte cytosolic protein 1 (LCP1), mRNA [NM_001034720]	AAGAAACTCACCCCTTTCACCATTCAGGAAAATTTGAACCTGGCTCTGAACTCTGCGTCA///GAAACACGGGAGGAGTCAGCCATTCCAAAATTTCAACTCGATGACATTATTCACAGTTCC
A_73_P442086,A_73_109452|539431	0.00806579	0.000100423	up	1.74968	1.74968	0.807095	MEN1	Bos taurus menin 1 (MEN1), mRNA [NM_001076161]	ATTGGAATATAGAGCCCATCCCCAAGGGTCCCAGCCGGCCATCTGAAACCTTCCCTCTGA///AGGGGAGCCTGATCTCTTCCTGTTTTGTACATAGATTTATTTTTCAGTTCCAAGGAAGAT
A_73_104173|614335	0.039095	0.00270535	up	1.74959	1.74959	0.807018	RAB3IL1	Bos taurus RAB3A interacting protein (rabin3)-like 1 (RAB3IL1), mRNA [NM_001046532]	ACCCCCTAGTGGCCATACTTCACCCCATTCCCAGATGGCCTCCCCAACGAAGGCTAGTGG
A_73_P342561,A_73_P261031,A_73_108601|513650	0.041228	0.00297392	up	1.74855	1.74855	0.806162	PAGR1	Bos taurus PAXIP1 associated glutamate rich protein 1 (PAGR1), mRNA [NM_001075632]	AATCCAACGGCTTTATGAACTGCTGGCTGCCCACGGTACCCTGGAGCTTCAGGCTGAGAT///AGCATCCAAACCCGAAGTGAGGAAAGAGGCCACTGCAGACCCGGAATCCAACCTGGAATC///ACTGATGTGTGTGTGTGTGTATGTTTTCTCTTGAACATCTGTTGGGAGACCTGAGCCGAA
A_73_113802|521383	0.02442	0.00107197	up	1.74854	1.74854	0.80615	PLA2G2A	Bos taurus phospholipase A2, group IIA (platelets, synovial fluid) (PLA2G2A), mRNA [NM_001075820]	AAAGAGAAGCACAGATCTGGGCATGTATGCCAAGCTCCTTGCCCCCGCTTCCTTGGACAG
A_73_100102	0.034016	0.00207002	up	1.74668	1.74668	0.804616		PREDICTED: Bos taurus uncharacterized LOC104976500 (LOC104976500), ncRNA [XR_001502091]	TAGGGAAAGTTGGAGCCGCCCCAGCCTGGAGCTGGGGAGTATTGTGTGGAGTGAATGAAA
A_73_P421226,A_73_P508073,A_73_P031291|515755	0.0327924	0.00194683	up	1.74615	1.74615	0.804181	LOC515755	Bos taurus solute carrier family 6 (neurotransmitter transporter, glycine), member 9 (SLC6A9), mRNA [NM_001102032]	AGGCCTATGAGGACGAGTCAGAGAATGGTTTTATGCCCGACGAGGACCACAGCCTCCAAC///AGCAGAGGCCCATGACCTAACAACCTGCCCAAAGAATTCGTTTCTGGGGGGTGATGCTCA///CCATCTGCGTACCACTAGGATTTTAAAGTCCATAGGTTTTAATGAAATTTCTATTCCTGT
A_73_102273,A_73_P315491|514627	0.0212657	0.00081605	up	1.74589	1.74589	0.803963	SPAG8	Bos taurus sperm associated antigen 8 (SPAG8), mRNA [NM_001102005]	CAGTCATGCAGGATGGCTCTGAGAGTTTCTTTTTCCGACACGGACACCGGGGACTGCTGA///GAAATGAATTTGGTCTGTACTTGGTGACAGGGTTTCACATAAAAAGTGTTCTCTCCCAAA
A_73_P346706,A_73_108537,A_73_103543|614077	0.0332917	0.00199957	up	1.74578	1.74578	0.803874	PTPN7	Bos taurus protein tyrosine phosphatase, non-receptor type 7 (PTPN7), mRNA [NM_001040576]///tyrosine-protein phosphatase non-receptor type 7 [Source:RefSeq peptide;Acc:NP_001035666] [ENSBTAT00000003923]	AGACACTGGCTCTTGAGCACTGGCCACTGCCCCCTGCCCCCAGTGGACACAGGGGCGACC///TGCCCCAACCCTGTCCAGACACGAGGACAGGCCGTGGAGAATAACAGGTGGGGAAATAAA///TGGGGAACAACAGAAGACAGCGAGAAGACCCGAGGTGCCCAAGGGCAGAAGGCTGCCCAA
A_73_120777|508869	0.0256217	0.00120869	up	1.74433	1.74433	0.802674	RND1	Bos taurus Rho family GTPase 1 (RND1), mRNA [NM_001046016]	AGTCGGGGGGAGGGGGGAGTGTTTCAATCTGTTCTATGTTCTGTGTTTAAAGAAGAAAAC
A_73_P190802|786883	0.00523018	2.25207e-05	up	1.74371	1.74371	0.802157	ULBP15	Bos taurus UL16-binding protein 15 (ULBP15), mRNA [NM_001168611]	AAGTGGGATAATGACAGAGCTGTGACAGAGTTCTTCAAGAATGTCTCCATGGCAGACTGT
A_73_P045411,A_73_104494,A_73_P425651|281581	0.0377188	0.00252439	up	1.74246	1.74246	0.801126	YARS	Bos taurus tyrosyl-tRNA synthetase (YARS), mRNA [NM_174220]///tyrosyl-tRNA synthetase [Source:HGNC Symbol;Acc:HGNC:12840] [ENSBTAT00000024051]	AACTGTGGGATTTGAAAAGTGGAGGGAAGGGAAAACAGAGAACCTAGTGGTCTACCAAGT///GAGGGTGGGGTACTTCTCCATAAGCCATCTCAGAACCACTAAATGTCGCTGTCATAAATT///AAAGTCATTAGTGTGGACAAGCACCCAGATGCAGACAGCCTGTATGTGGAGAAGATTGAT
A_73_P489603	0.0154994	0.000413428	up	1.74238	1.74238	0.801056			TGTGGTTATGGAGGCTACGGATGTGGCTGCTACCGCCCATGTTACTATAGAAGATGCTGA
A_73_P078616	0.0183213	0.000605288	up	1.74229	1.74229	0.800987		PREDICTED: Bos taurus family with sequence similarity 48, member A-like (LOC784572), mRNA [XM_001252840]	TTGAAAAACACTTCAGACCTCAGGCCCTTTGCTCTGGTGGAGCTCCCCCGCAGTTCACTG
A_73_P492868	0.0499097	0.00429206	up	1.74177	1.74177	0.800555		GB	GGAAACTCAAAGCCCACACGTACATGTGTCTCCCCTATTTGTGCTGTGCTCATTCTATAT
A_73_P068486	0.0293518	0.00154459	up	1.73973	1.73973	0.798865		LB011160.CR_A03 GC_BGC-11 Bos taurus cDNA clone IMAGE:0 5', mRNA sequence [EV619351]	AGAGCAGGTTTATATTCTCATCGGGGTCTCTGTGGCCTTTCTCCTTTGTCTCTCCCTCCT
A_73_P160802	0.0366473	0.00238274	up	1.73944	1.73944	0.798626		Rep: Uncharacterized protein C7orf43 - Homo sapiens (Human), complete [TC470475]	CTAAGTTTACAAAGTGTTTTCCTTGTTCCTCTTATGTTGTCTTCCCCGCCTCTGACATTC
A_73_P101336,A_73_P331301,A_73_104241|353110	0.0391285	0.00270916	up	1.73887	1.73887	0.79815	NGFR	Bos taurus nerve growth factor receptor (NGFR), mRNA [NM_001102478]	TACCAGGACGAGACGACCGGCCGCTGCGAGGCGTGCCGCGTGTGCGAGGCGGGCTCGGGG///TACATAGACCACACTTCTTTGACCTGAATCAGTAACAGGAGGAGGAAACTCACCTGCTGA///TGCCCCTTGCATCCTGTGTAATCATTTCTTGGGTCCTCCTGAAACCTACACATAAAACAT
A_73_P073776,A_73_105199|521239	0.0411857	0.00296145	up	1.73781	1.73781	0.797266	MKX	Bos taurus mohawk homeobox (MKX), mRNA [NM_001192534]	ATCTTTTAGTTCCAATGAGTTTGAGGAGGAGTTGGTATCTCCCTCGTCATCAGAAACGGA///TGTTCACTAGTTCCCATGTTAAAGCTTGGAAATCTCTTCAGCCCAGATGAAATGTTCCTT
A_73_112653	0.0308814	0.00172179	up	1.73653	1.73653	0.796206		Rep: LOC534455 protein - Bos Taurus, partial (56%) [TC395371]	TTTCTGGAAAATAAGCAGCAGCAGCAGCAGCATGCTATTTGCGTTTCTAAAGAGAAAACA
A_73_117273|513538	0.00524479	2.36648e-05	up	1.73585	1.73585	0.795643	NPTX1	Bos taurus neuronal pentraxin 1 (NPTX1), mRNA [NM_001192354]	GCTTGTTCGGTGATGATCCGTCGTCTCTTCTTCTCTCCCTTTCCCCCAGGAATGACTCAA
A_73_119781	0.00603799	4.6871e-05	up	1.73507	1.73507	0.794994			CTCTGTTTTGGCCTGTGTCAAGCCCTGTCTCTGTGCTTAGGAAGTTTTGATACTCCTTTT
A_73_P122386	0.0118716	0.000236138	up	1.73426	1.73426	0.794319		LB03025.CR_G15 GC_BGC-30 Bos taurus cDNA clone IMAGE:8141609, mRNA sequence [DV932304]	TCAGCTACTTTGGGCATTTCTGTTTTCCCAGCACAGAAGGGGAAGAAAAAGTGCAGAACT
A_73_108051|539075	0.0284685	0.00147294	up	1.73129	1.73129	0.79185	NKX2-8	Bos taurus NK2 homeobox 8 (NKX2-8), mRNA [NM_001192163]	TTCGGGCCTGGCTCGGCTTTCGGCCTCTTCCCCGCCTACCAGCACTTAGCGCCCCCCGCC
A_73_P202772	0.0119913	0.000247202	up	1.73103	1.73103	0.791629		LB02444.CR_M10 GC_BGC-24 Bos taurus cDNA clone IMAGE:8699892 5', mRNA sequence [EV644158]	GAGAACAAAGCTTTCTGCCTACCCTCATATTGCCTTCCCTGTAATACAGCCCTTATGAAG
A_73_P395036	0.0247371	0.00110339	up	1.72974	1.72974	0.790556		peptidoglycan recognition protein 2 [Source:HGNC Symbol;Acc:HGNC:30013] [ENSBTAT00000047024]	AGAATCGTAAACCTCTCCTTAGAGAGCACGGCCACCCCTCCGGATGCTGGAGTCACCTTT
A_73_105415	0.00826119	0.000106516	up	1.72802	1.72802	0.789116		GB	CCATGGTTTTGGTTGGGGCGGTGTCTGTGCTGGTGGGACCATTCTCCTCAATTGTGGTGT
A_73_P030646,A_73_P089871,A_73_119299|338056	0.0205579	0.000752027	up	1.72768	1.72768	0.788832	CD163L1	Bos taurus CD163 molecule-like 1 (CD163L1), mRNA [NM_176651]	ATGAAAATTATGATGATGCTGAAGAAGTACCAGTGCCTGGAACTCCTTCTCCCTCTCAGG///TAGATTTAATTCAGTGTCGGAAAATGGATACCTCTCTCTGGCAGTGTCCTTCTGGCCCAT///ATGAGATGAAGCCTCAGATATTCTAACTGCCTGTATTTCAGTAGAGTAGTGCTGACCTGT
A_73_116606|505038	0.0213491	0.000825719	up	1.72631	1.72631	0.787695	SAAL1	Bos taurus serum amyloid A like 1 (SAAL1), mRNA [NM_001205561]	AATTGTTTGGTATCATACTCATGCCCTTCTCCTCCAGCCTTATCTCATTTTTGTTTGGCA
A_73_P091541,A_73_P091536,A_73_P115766|514534	0.00540712	2.60581e-05	up	1.72501	1.72501	0.786601	WC1.3	Bos taurus WC1.3 molecule (WC1.3), mRNA [NM_001190424]	TATGAAGATGCTCTTGCTGAAGCCGTGTATGAAGAGCTCGATTACCTTGTGACACAGAAG///AGTCCGATTTCACTGCTTGGGTGCAGAGTCCTTCCTGTGGAGTTGCCCTGTGACTGCCTT///AAGGAGGATGCTGGTGTGAGGTGCTCTGGTGCAAGAACATCTTTGCCCCCGACTACAGCA
A_73_P030146,A_73_P351731|510521	0.0455489	0.00354464	up	1.72171	1.72171	0.783842	TSGA10IP	Bos taurus testis specific 10 interacting protein (TSGA10IP), mRNA [NM_001098009]	CTTCGCCCCAAATCCAGACCAAGAGTTGAGTCCCTGAGAGAAAAATTAAATGCTTTGTGG///AGAAAGGGCAAAGCTCTGCAGAAGCTGAGGATGTCGTCCCCTCTTCTCCTCGGAAACCCT
A_73_P050306|534090	0.025114	0.00114042	up	1.72118	1.72118	0.783399	BDH1	Bos taurus 3-hydroxybutyrate dehydrogenase 1 (BDH1), mRNA [NM_001034600]	GGCAAACATGGTGCATCTGTCTTTCTGGAGTTGATTTTATACAAAGATTTTAGGTAGATA
A_73_P061576,A_73_106332|517425	0.0174093	0.000534627	up	1.72102	1.72102	0.783263	SLC25A45	Bos taurus solute carrier family 25 member 45 (SLC25A45), mRNA [NM_001205840]	TGGGAATCTATTTCGTCACCTATGAGTGGCTGTGTCGCCAATTCACGCCGGACGGCCAGA///CGTCCTGTGACTTTGCCCCTTTAAGAGCTGCCTGGTGCTAACCACCCTCCCTGGATTTGA
A_73_110803	0.0322214	0.00188252	up	1.72054	1.72054	0.782861		Rep: LOC526125 protein - Bos taurus (Bovine), partial (3%) [TC443972]	AACTGCACACTAGCCCTCTTTTCCTTTCTAAGGTCATTAATCTATTCTTTTTGTATGGAG
A_73_115094|536311	0.00166106	3.53991e-07	up	1.72027	1.72027	0.782637	KRT35	Bos taurus keratin 35 (KRT35), mRNA [NM_001076073]	ACGCTGCCCCACCCGTTGACCTGAACCGTGTTCTGAATGAGATGAGGTGCCAGTATGAGA
A_73_P491598,A_73_108404|520147	0.0205333	0.000746437	up	1.71923	1.71923	0.781763	LHFPL3	Bos taurus lipoma HMGIC fusion partner-like 3 (LHFPL3), mRNA [NM_001104984]	CAGCTCACTGGAAACTATCATTGAATAAGAGCAAATGACATTCATGAGAAATCACATTCA///GCTGCCCTCGGGCGCCTTCAAAGCCGCCTCCTTTTTCATCGGCCTCTCCATGATGCTCAT
A_73_113926|511818	0.0142243	0.000347602	up	1.71879	1.71879	0.781393	RTP5	PREDICTED: Bos taurus chromosome 3 open reading frame, human C2orf85 (C3H2orf85), mRNA [XM_589231]	GTCTCGCTGGCCGTCTGTGTCCTCTGGATAATGTACCTGTGCAAGTTCAGCCCCGACCGC
A_73_P211143	0.0250778	0.00113525	up	1.71673	1.71673	0.77966			GCCTCTCTTTTTCCCCTCCTTGCATGTGTTTTGTTTTTAATGCGACTCAGAAGCATTTTA
A_73_P115576	0.0255619	0.00119623	up	1.71602	1.71602	0.779066		autophagy related 9B [Source:HGNC Symbol;Acc:HGNC:21899] [ENSBTAT00000043813]	TGAGGATGGGAAGACGGAACTCTCCTTGATGAGGTTCTCCCTGGTTCACCCACAATGGCG
A_73_P046316,A_73_P369656|514456	0.0364104	0.00236271	up	1.71523	1.71523	0.778399	GPD1L	Bos taurus glycerol-3-phosphate dehydrogenase 1-like (GPD1L), mRNA [NM_001100363]	TGAGTGTGTGTTCCTTTCTCATTCTATGGATGTTTCTATGAACCAAAATTAAAGGCCCTT///TTCTGCAGACTCCAAATTTTCGAATTACGGTGGTGGATGATGCAGACACGGTTGAACTGT
A_73_106163,A_73_P318841|104968455	0.00806579	0.000100372	up	1.71402	1.71402	0.777386	GDF1	PREDICTED: Bos taurus growth differentiation factor 1 (GDF1), mRNA [XM_585368]	GCCTGTCGCCCATCTCCGTGCTCTTCTTCGATAACAGCGACAACGTGGTGCTGCGGCACT///CTGTCTGAACCTGGCGGGACTCCCGCGCTCAACCACGCGGTGCTGCGCACGCTCATGCAC
A_73_P054946,A_73_P206112|615274	0.0230732	0.000964498	up	1.71215	1.71215	0.775807	CORO2B	coronin 2B [Source:HGNC Symbol;Acc:HGNC:2256] [ENSBTAT00000016845]///LB02727.CR_A08 GC_BGC-27 Bos taurus cDNA clone IMAGE:8316178, mRNA sequence [DV893437]	CGGAATAGATTTACTAGAAAATGTCCCACCCAGGACAGAGAATGAGGTAAGAAAAATAAG///CAGCTCCTTCCTGTCTCTTGCCCCCTCTCTCTTATCTTCAGGGAATTAAGAGGATCCTTC
A_73_P066066|614821	0.0320251	0.00185978	up	1.71196	1.71196	0.775648	LOC614821	Ig-like V-type domain-containing protein FAM187A [Source:UniProtKB/Swiss-Prot;Acc:A7E3C4] [ENSBTAT00000017992]	TCGGGCCGCCCTGGGGCTCATTCTGATAGGCTACATGCTCATCACGGTCATCTTTATCAG
A_73_110400|538745	0.0161692	0.000466786	up	1.71061	1.71061	0.77451	GJC2	Bos taurus gap junction protein gamma 2 (GJC2), mRNA [NM_001046440]	CTGGGTGTTGAGGGGTTTTGTGCTTATCCCCACTCCTTTCCTAGCACCCGCACTCTTCTA
A_73_P045136,A_73_P108951,A_73_P075166|281301	0.0483895	0.00402979	up	1.71035	1.71035	0.774292	MCAM	Bos taurus melanoma cell adhesion molecule (MCAM), mRNA [NM_001110062]///melanoma cell adhesion molecule [Source:HGNC Symbol;Acc:HGNC:6934] [ENSBTAT00000047009]	CTGCGTGTATGTGTGTGTGCGTGTGTGTATATATACAGTTTTGTTAGGTTGTAAATTTGC///TAAAGTTATATTAGCACCAGGGTTCCTAATGGGAGAATGGTACTTGGAGATGAGAAATGG///AATTTGTAGTTGAAGTTAAGTCAGATAAGCTCCCAGAAGAGATGGGCCTCCTTCAGGGCA
A_73_P050906|787259	0.0430949	0.00323264	up	1.70977	1.70977	0.773805	PYM1	Bos taurus PYM homolog 1, exon junction complex associated factor (PYM1), mRNA [NM_001102344]	ATGAGAACAAGTATGTGAAGTTTTTCAAGAGTAAACCAGAATTGCCCCCTGGCCTGAGCC
A_73_P050371,A_73_P251286|508454	0.0207262	0.000762136	up	1.70916	1.70916	0.773286	GJB6	Bos taurus gap junction protein beta 6 (GJB6), transcript variant 1, mRNA [NM_001015546]	TTTGCAATCCTTATGAACAGCTGATGCAAGAATACACTCTCAATAAAGATGAGTCCGTTG///ATCTTCATGATCTCCGCATCCGTCATCTGCATGCTGCTCAACGTGGCCGAGCTGTGCTAC
A_73_P459756,A_73_P071501|538754	0.0250737	0.00113411	up	1.70827	1.70827	0.772535	PPP1R15B	protein phosphatase 1 regulatory subunit 15B [Source:HGNC Symbol;Acc:HGNC:14951] [ENSBTAT00000017382]	TTTTCGGTGGGATGATCCCTACCAGATGGCTAGACTTTGCTGGAGGCTACGGCCTCCTGA///GGTGTGATTTCTAATCCTCCCTTTTTTGTTTAGTTGGATCTGTTCTAGAATGTTGTTTGC
A_73_109830	0.0169303	0.000510303	up	1.7021	1.7021	0.767317		Rep: Sarm1 protein - Xenopus tropicalis (Western clawed frog) (Silurana tropicalis), partial (5%) [TC468356]	TTTGTTAAATCCTAACTGTCTGCCGTGCCCCCTGACTTCTTTTAAATGGACATGCATGCT
A_73_119435,A_73_P191152,A_73_P052126|286823	0.0138753	0.000330219	up	1.70053	1.70053	0.765982	CLIC4	Bos taurus chloride intracellular channel 4 (CLIC4), mRNA [NM_001080218]	TTCATCCCTGGAGTCCATTCACTGTGTATCGATGACAGAACTTTTGAGGTGCACTGTTCA///AGTTGTGTTTAGTGTCACAACTGTTGACCTGAAAAGGAAGCCTGCAGACCTGCAGAACTT///TGCCCCAGTGATAAGGAGGTTGAAATAGCATACAGTGATGTAGCCAAGAGACTTACCAAA
A_73_103516	0.0119462	0.000238532	up	1.70042	1.70042	0.765894		Rep: PP4377 - Homo sapiens (Human), partial (66%) [TC417834]	GTGTCCCCGCGTATTTATTTGTTGTAAATATTTGAGTATTTTTATATTGACAAATAAAAT
A_73_P132196|614588	0.0208853	0.000783905	up	1.69902	1.69902	0.764706	DNAJB9	Bos taurus DnaJ heat shock protein family (Hsp40) member B9 (DNAJB9), mRNA [NM_001193039]	TGTGTGTGTGTGGTTTTTCTTCTTTGCACTCATCTTTAGAGATTGACTAATACCTCATTC
A_73_109793|505170	0.00681979	6.28888e-05	up	1.69896	1.69896	0.764653	CYTL1	cytokine like 1 [Source:HGNC Symbol;Acc:HGNC:24435] [ENSBTAT00000014829]	GCCGTGGCCCCCATAGCTCTCCTTGAAACTGTCACGAGTTTGTCTTCACCTTCTGAAACC
A_73_102305	0.0455489	0.00354747	up	1.69894	1.69894	0.764632		CR850431 Normalized and Subtracted bovine endometrium tissues (bcbp) Bos taurus cDNA clone bcbp0010.n.23 5', mRNA sequence [CR850431]	GACTCAACATTTCCCATGCCCCACATGCTGACGTTGCCAATATGCGCCTCCTTTAGGAGT
A_73_P435111,A_73_P263871,A_73_P036201|506194	0.0369157	0.00242504	up	1.69892	1.69892	0.76462	TACC3	Bos taurus transforming acidic coiled-coil containing protein 3 (TACC3), mRNA [NM_001100305]	ATGGAAAAGTCGTTCTCCGACCTTTTCAAGCGGTTTGAGAAACAGAAGGAGGTGATCGAA///AATCAACAGTTCACCAAGGAAACAGACACCAAAACGACCCATGGAATTCTCCAGAAGCCA///GTGTGTATGTGTGTGTGTCTGTCTGTCTGTCTAGGTTTTTCTTCTCTATTGACGTCTTTT
A_73_P069876,A_73_P036046|767961	0.0494205	0.00422023	up	1.69737	1.69737	0.7633	NDUFAF2	Bos taurus NADH:ubiquinone oxidoreductase complex assembly factor 2 (NDUFAF2), mRNA [NM_001077029]	CCGGAGTACAAGAACTGGAGAGGACAAACTATTCGAGAGAAAAGAATTGTAGAAGCAGCA///CAAGGGCCACAGTCAATGAGCGTACTGTGGTAAAGTTTTATTTATATGTATGTGACTATT
A_73_P032096,A_73_111060|281733	0.0359267	0.00231635	up	1.69361	1.69361	0.760098	CXADR	Bos taurus coxsackie virus and adenovirus receptor (CXADR), mRNA [NM_174298]	GTAGAGTATTTTGCAGTTGCCAAGTAAATGCTGGCCCTGCGCTTTAGGTGATATTTTCCT///GTCACCCATGCTGTCCTCTGGAAATATGAACATCCGTACATTTTGCTACCAGCCTCAAAA
A_73_P494148	0.0112532	0.00021226	up	1.69348	1.69348	0.75999			ATTTACATGACTTTAATCTCCCTCTGCCTGTGTGCCCCCAAATGCCAGAGTAATGGTAGT
A_73_101404	0.00900926	0.000126727	up	1.6934	1.6934	0.759919		Rep: MPN domain-containing protein (EC 3.4.-.-). - Bos Taurus, complete [TC403115]	GGGGCTCAGATTATATAATAAAGGAGAAACGGGCCAGGTGTCTCTCAGGTGCTGTGACTG
A_73_P037861,A_73_P091431|538579	0.00900926	0.000131393	up	1.69266	1.69266	0.759293	RIMKLB	Bos taurus ribosomal modification protein rimK like family member B (RIMKLB), mRNA [NM_001076113]	TGCATCTTTAACAATGGCCAAAGTGAAGAAAATGCTACCTTTTTTGTTAACAAGACACTG///CAGGTGTCTAATATCCTAGGAATGGATGTGTGTGGCATTGACCTGTTGATGAAAGACGAC
A_73_111651	0.0372406	0.00245797	up	1.69198	1.69198	0.758711		Rep: Exportin-5 (Exp5) (Ran-binding protein 21). - Canis familiaris, complete [TC464232]	TCATGCTAGAAGTTTTCTATTGTTTATATAACTTTTTTGTAGAAACATTTAACTGAAGCA
A_73_115478	0.00542407	2.84136e-05	up	1.69149	1.69149	0.758298		Rep: 60S ribosomal protein L28 - Bos taurus (Bovine), partial (92%) [TC472774]	TTAGGTCTCTGTGGTTTCTCATCGCCTTGTCCCCTGTAGTGAGTCTCGGCCGCCTGAGTT
A_73_102768	0.0218227	0.000862332	up	1.69139	1.69139	0.758208		Rep: Chromosome undetermined scaffold_129, whole genome shotgun sequence - Vitis vinifera (Grape), partial (9%) [TC435739]	CCTGTGACTGGCCCTGCCTGTGGATGGTTTTGTTACATGAGCCAATAAATTCCGTTTATT
A_73_P097806	0.0357081	0.00227913	up	1.6913	1.6913	0.758136			GAGACTCTCTCCCATGTCTTCTTGTCCTCATTCTGAATCTCATTGGAAATCATTCCTTTC
A_73_P087226,A_73_P035816|615555	0.00502024	1.91194e-05	up	1.69101	1.69101	0.757889	NEUROG2	Bos taurus neurogenin 2 (NEUROG2), mRNA [NM_001144105]	GGTTCAGACATGGACTATTGGCAGCCCCCACCTCCAGACAAGCACCGCTACGCACCTCAC///TCAAATCCGAGACCTTGGAGTTAAAGGAGGAAGAGGACGTGCTGGTGCTGCTTGGCTCGG
A_73_P125016,A_73_113680|510410	0.0333497	0.00201041	up	1.6908	1.6908	0.75771	RESP18	LB02754.CR_L09 GC_BGC-27 Bos taurus cDNA clone IMAGE:8630363, mRNA sequence [EE349236]///Bos taurus regulated endocrine specific protein 18 (RESP18), mRNA [NM_001077897]	AATTTGGAAGGCTTCTAGTCAAGATCCTTTCTCACACCACTTTTTTGCCCTCAGATGGTC///GGTGCCCTCCTCATTGCCCTCCAGAGGGGCAGTTCTGGGATGATCAAAACCTGGATCAAT
A_73_P030396,A_73_109074|281246	0.0156914	0.000425799	up	1.69035	1.69035	0.757325	IL10	Bos taurus interleukin 10 (IL10), mRNA [NM_174088]	ACATGACAACGAAGATGCAAAAGTGAAGCATTCTAGGGAAGAAGACCTCCAGGATGGTGA///TGTGCCTCTCCCCTAGAGTATTTATTACCTCTGATACCTCAGCTCCCACATATATTTATT
A_73_P494168,A_73_P118481,A_73_P032761|768028	0.0366473	0.00238515	up	1.6891	1.6891	0.756255	BEX2	Bos taurus brain expressed X-linked 2 (BEX2), mRNA [NM_001077087]	ACCCAATCTGTAAGTTTCTATCAGCAGGAAGGTTTTAACTGTTGCATGGAGAAATGTTCA///GGTGTTAAACTTGTTTCTTGCGCGTTTCCTATTACCAGCTTCTAACTGAATGTTCTGTTT///TCTGTCAGCAGGAAGGTTTTAACTGTTGCATGGAGAAATGTTCGTTATATATTGTGAAGT
A_73_P491438	0.0493494	0.00420287	up	1.68901	1.68901	0.756182		Rep: Ferritin heavy chain - Trichosurus vulpecula (Brush-tailed possum), partial (67%) [TC440418]	AGAAGGCGGTCTGGCAGAGTACGCTTTTGACAAGCTCACCCTGGACACCAGTGACAAGGA
A_73_112065|506185	0.0120321	0.000251321	up	1.68855	1.68855	0.755786	OGFOD3	2-oxoglutarate and iron dependent oxygenase domain containing 3 [Source:HGNC Symbol;Acc:HGNC:26174] [ENSBTAT00000024181]	GGACAAGGTGACCTATGGTTCCTTTGACTACACATCACTACTGTACCTTTCCGACTACCT
A_73_P489938	0.0319215	0.00184612	up	1.68822	1.68822	0.755506			CTCATGAGGATGCTGCAGCATTTTATGGTCTGCCTCTCATTGTCTCCAGCCTGGTCACAG
A_73_P111896	0.0372681	0.00246651	up	1.68815	1.68815	0.755445		PREDICTED: Bos taurus CD163 molecule-like 1-like (LOC518933), mRNA [XM_597136]	TGTGCAGTAACGCCCTGAAGGACGCCTCCTTGTCCATCATCTGCCAGCAGCTGGGCTGTG
A_73_102457,A_73_P077976|527180	0.00993222	0.00016806	up	1.68602	1.68602	0.75362	GABRQ	Bos taurus gamma-aminobutyric acid type A receptor theta subunit (GABRQ), mRNA [NM_001192639]	CTCCTCTTCCCTCTTGCCTTCGTGGTGTTCAACATTGTGTACTGGGTGTATCATATCTAT///TTAATGGTATTGATGTTGATAACAGTGTTGTTCCCACCGAAATCCGCAACCTTGCTGAGA
A_73_P092135|509633	0.0423049	0.003116	up	1.68602	1.68602	0.753618	LOC509633	GB	TGGTCTCTGCTTGGGCTGCTGGCTTCTTTATTTCTGTGACAGAGATTGCGTTGATATTCA
A_73_106057	0.0268238	0.00133646	up	1.68497	1.68497	0.752724		BovGen_12133 normal cattle brain Bos taurus cDNA clone RZPDp1056F078Q 5', mRNA sequence [CO883808]	AGCAGGGTGGTCCTGCTCTGGGGTGGGTTTTTATTTTCCTTCTGCTGATGTGTTAATTAA
A_73_P259906,A_73_106000,A_73_P352441,A_73_P309396|507157	0.00409472	9.66938e-06	up	1.684	1.684	0.751893	TMEM59L	Bos taurus transmembrane protein 59 like (TMEM59L), mRNA [NM_001075301]	TAAGTTCCAGCCCCTGACTCTGGAGCAGCACAAGGGTTATATGGTGGAGCCAGAGTGGTC///CCAAGAGAAGGGGCGGTGGGTAGCTCCATGCTGGGAGGGTGAATGAGGCTGGTGTTGCAA///GCAATGACCTTGTCAACTCGGCTCAGGGCTTCGTCTCCTCTACCTGGACATACTACCTGC///ACTACCTGCAGACTGACAATGGGAAGGTGGTGGTGTTCCAGACCCAGCCTGTGGTAGAGA
A_73_P077671,A_73_116026|281457	0.00674959	6.12126e-05	up	1.68393	1.68393	0.751837	GRK1	Bos taurus G protein-coupled receptor kinase 1 (GRK1), mRNA [NM_174173]	TCTCCACGGTCAAGGGCGTGGCCTTTGAAAAAGCGGACACGGAATTCTTCCAGGAGTTCG///AGCCTGCTGGTGGGGATGTTTCAAGTGCGTCTTTGGCCCCTGTGGCACCAAGGACATTAA
A_73_P050651|510060	0.0455296	0.00353924	up	1.6835	1.6835	0.751464	ODF3B	Bos taurus outer dense fiber of sperm tails 3B (ODF3B), mRNA [NM_001035084]	CTGACGGTGACCCGCTGGGCGGGCGCTGCGCCGCAGATGTTTCTTAAAACCTCTGGAGCC
A_73_P213152	0.0446073	0.00341826	up	1.68329	1.68329	0.751287			TGGTTGCATCTGGATGGCGTCTTAGAACCCACAATGCTGAAAGCTAAAGAATCTTTGTAG
A_73_P037211|100125310	0.0111144	0.000208026	up	1.68173	1.68173	0.749948	B3GALNT2	Bos taurus beta-1,3-N-acetylgalactosaminyltransferase 2 (B3GALNT2), mRNA [NM_001103343]	AAGTGCCCTTTGATGATGACTTTTCGTATCATGTCTGTGGTATTTAATATTTCCCCCTTA
A_73_114277	0.00595087	4.46578e-05	up	1.68166	1.68166	0.749885		PREDICTED: Bos taurus PR domain containing 2, with ZNF domain (PRDM2), transcript variant X1, mRNA [XM_003583252]	TCTCAGCCCCATTTTTGATGGTGATGCGCCAGACCCAAAGTGGAAAGAGGGGACCCTTTA
A_73_P177457	0.00506393	1.9804e-05	up	1.68019	1.68019	0.748626		4079004 BARC 9BOV Bos taurus cDNA clone 9BOV14_E13 3', mRNA sequence [CK964462]	GACCACCTCTAACTCCAAGGTCCCTGTAGCCCTTCCCCTTAAGAATAAATTAAGGAATAT
A_73_103221|504476	0.00594292	4.14253e-05	up	1.68001	1.68001	0.74847	ACTL6B	Bos taurus actin like 6B (ACTL6B), mRNA [NM_001083370]	CTTTTGTTCCCCTCCCCACTTGTCCTCTTGATTGTGAAGTTTCCGGGTTAAATGGAGTAA
A_73_119362|281642	0.0232581	0.000975093	up	1.67936	1.67936	0.747908	AVPR2	Bos taurus arginine vasopressin receptor 2 (AVPR2), mRNA [NM_174246]	ACCCAGTCTTGTCCCCCTTGGCCTTTCCTTCTGACCTTGCCTCATAAAAACTCCGGCTCG
A_73_P512018|525900	0.00603799	4.69363e-05	up	1.67902	1.67902	0.747619	SHOX2	Bos taurus short stature homeobox 2 (SHOX2), mRNA [NM_001205527]	GAGAAAAAGAGAAAGGGAACTTATTGCTATTCAGCAGAAGCTGAAATCGGAGAACCAAGG
A_73_P125101	0.0244982	0.00108288	up	1.67676	1.67676	0.745679		LB02618.CR_D23 GC_BGC-26 Bos taurus cDNA clone IMAGE:8216425, mRNA sequence [DV881326]	TGGAAAGTCTGTTTGTCCTTCTTCAAGTTAGGTCTCATCTCTAGCTCTCAGCTTCTCCAT
A_73_109262,A_73_P455516,A_73_P294306|507197	0.0475941	0.00389378	up	1.67572	1.67572	0.744778	SHMT2	Bos taurus serine hydroxymethyltransferase 2 (SHMT2), mRNA [NM_001034282]	CCTCTGATCAGAGGCGACACCAGACGTGATTAGCAGGCGCAACAAATTCAATTTGTTAAA///AGAGGAAGGGGTGGGTAGGCACCCTTCTTTCTGTTTCTATCTAATAAAATACTAACCTGC///TATCTTCTTCGAGTCTATGCCTTATAAGCTGAACCCCCAAACCGGCCTCATTGACTATGA
A_73_P251051,A_73_P102156,A_73_118470|317704	0.0161631	0.000462319	up	1.67484	1.67484	0.74402	SLCO2B1	Bos taurus solute carrier organic anion transporter family member 2B1 (SLCO2B1), mRNA [NM_174843]	TTTCTGGCCAGGTCTTATCTGGCTTGATTATCTTCCTGGGAAAGGGAGAGAATTTCCCAA///AGTGAAGAAAGAAGACAAGACTCTGGCTGTGGGGATCCAGTTCATGCTCATGAGAGTTTT///AAGATGAGGCTGTTTCTATGTTCATATTCCGCCTCCTTCCCTCTTGTTTCCCACGTTTTG
A_73_P054811|538094	0.0218055	0.000860818	up	1.67347	1.67347	0.742844	MAPK6	mitogen-activated protein kinase 6 [Source:HGNC Symbol;Acc:HGNC:6879] [ENSBTAT00000007709]	AGGAATGGATTGGTTAAAGCCCAGATAGCTTTAGAGGAAGCATCACAGCAACTGGCTGAA
A_73_114995,A_73_P165572|616286	0.0214523	0.000834803	up	1.67303	1.67303	0.742465	ASB10	ankyrin repeat and SOCS box containing 10 [Source:HGNC Symbol;Acc:HGNC:17185] [ENSBTAT00000033400]	TCTACAGAAGCACCATCGTTTCTACTCCTCCCTCTTCGCCCTGGTGAGGCAGCCCAGATC///TTTCCGCTTCAACATCCGCGCTCTGAGACTCTGGTCGCTGACCTATGAAGAGGAGCTGAC
A_73_117965|407188	0.0218055	0.000859786	up	1.6724	1.6724	0.741922	KRT3	Rep: Keratin, type II cytoskeletal 68 kDa, component IB - Bos taurus (Bovine), complete [TC399048]	TATATAACACACAGGTCCCTCTGCCCATCCGTTCTGTCGCCAGTAAAATGCATTGTGTTT
A_73_102807|510040	0.0242101	0.00104523	up	1.67136	1.67136	0.741021	FITM1	Bos taurus fat storage inducing transmembrane protein 1 (FITM1), mRNA [NM_001105351]	CTCCCACACCTTCCTGCTCACCTTCTGCTGCCTGCTCATGGCCGAGGAAGCAGCAGTGTT
A_73_114815	0.0431624	0.00324174	up	1.67011	1.67011	0.739945		ATPase phospholipid transporting 8B3 [Source:HGNC Symbol;Acc:HGNC:13535] [ENSBTAT00000031583]	TCATCTTCTGGGGCTTTCTCATCCTGCTCAGCGTCCTGGTGCCCATGGCCATGTTCATTA
A_73_P488033	0.0418922	0.00305216	up	1.66925	1.66925	0.739196		GB	GGCAGCACACACAGTCACTTGGACACGCGGGGAGAGATCGTGGGTTTAAAAATAAAATAA
A_73_104228,A_73_P089581|517496	0.00428729	1.1432e-05	up	1.66805	1.66805	0.738166	ZNF777	Bos taurus zinc finger protein 777 (ZNF777), mRNA [NM_001192473]	GGATAGAACTTTATAATGACATTTTGGATACTGTGGTTCTATTTGATAATAATAGAGTAA///ACCTGGGGAACCCCCTTTGGGCTGTTCATTTCCTTGACAATAAAATGGATGAAACCAATC
A_73_119581	0.025762	0.00122414	up	1.66705	1.66705	0.737299			TCTTTGTGGCTGAAATCAGGCTGCTCTGTGACTTGTGAGACAAAGTCCCTTCCCCTCCCG
A_73_104734,A_73_P322616|281088	0.00307331	2.84333e-06	up	1.6666	1.6666	0.736907	COMP	Bos taurus cartilage oligomeric matrix protein (COMP), mRNA [NM_001166517]	CCAAGTGGGCTATATTAGAGTGCGATTCTACGAGGGCCCAGAGCTGGTGGCAGACAGCAA///ATAACTGCGTCCCCAACTCTGTATGCGTCAATACCGTGGGCTCCTTCCAGTGTGGCCCTT
A_73_P122761,A_73_120497|533224	0.0331567	0.00198362	up	1.66645	1.66645	0.736775	AAMDC	CR453440 Normalized and Subtracted bovine embryonic and extraembryonic tissues (bcaz [CR453440]///Bos taurus adipogenesis associated Mth938 domain containing (AAMDC), mRNA [NM_001037473]	CGAATGTACATATACTGCAGCTCAAATGTGTTCTCAGGCCTTTCTTGATCACCTCATTTA///GAGGGGTCTTCCATTCCACCTGCTGATGGAGGCTTAAGAGAATAAATCACTGAACAATGA
A_73_115040	0.049881	0.00428426	up	1.6642	1.6642	0.734829		NLR family CARD domain containing 5 [Source:HGNC Symbol;Acc:HGNC:29933] [ENSBTAT00000007129]	TCAAGGAATGTCAGCTGGAGCCCCTGAGCCTCTCCTACCTCTGCAAGTCTCTGGAGAAGT
A_73_P062581|529518	0.0244283	0.00107327	up	1.6635	1.6635	0.734223	LOC529518	Rep: olfactory receptor Olr1394 - Rattus norvegicus, partial (87%) [TC400066]	AACCAGGATCAGGAAAAGTTCATGTCTCTCTTCTACACTGTCATTATCCCCATGACCAAC
A_73_P350036,A_73_P043861|616660	0.0345618	0.00214644	up	1.66245	1.66245	0.73331	TSPAN11	Bos taurus tetraspanin 11 (TSPAN11), mRNA [NM_001080325]	TGATACTCACCTGCGGCTTGCACCGGAGGCTCCAACTGCATTTTTACTAACAGCCGACCG///AGCCATGTGCCCCTCGGGGGTCTCCTCTCTGGACTGATGCTCAAAGAAAGCCAAGTTTTT
A_73_P134116	0.0366473	0.0023838	up	1.65979	1.65979	0.731004		Rep: 5E5 antigen - Rattus norvegicus (Rat), partial (13%) [TC465482]	AAACCCCTTGCCCCTCCCTGGAGAGCCGCCTTTCTTGGAACTGAACTGAACTCTTTTGGG
A_73_103073|538659	0.0492967	0.0041965	up	1.65696	1.65696	0.728542	TSSK3	Bos taurus testis specific serine kinase 3 (TSSK3), mRNA [NM_001206825]	TGCACGTCATGCTCTGTGCCAGCCTGCCTTTTGACGACACAGACATCCCCAAGATGCTGT
A_73_P080246,A_73_P080251|286815	0.00603675	4.64666e-05	up	1.65664	1.65664	0.728261	GCH1	GTP cyclohydrolase 1 [Source:HGNC Symbol;Acc:HGNC:4193] [ENSBTAT00000009020]	TGGTTGAAGCAACACACATGTGCATGGTAATGCGAGGAGTGCAGAAAATGAACAGCAGAA///CCTGGAGGGCGGCCACGGCCATGCAGTTCTTCACCAAAGGCTACCAGGAAACCATCTCAG
A_73_111218|508443	0.0190024	0.000643721	up	1.65659	1.65659	0.728219	ABCG4	Bos taurus ATP binding cassette subfamily G member 4 (ABCG4), mRNA [NM_001105343]	CATTCAAACTCCTGTCCATGTCCTGCTACCTTCTTCCTATCAGCCAAGGTGGGCCCTGGG
A_73_112180,A_73_P116206|529036	0.0356437	0.00227129	up	1.65547	1.65547	0.727237	LOC529036	Bos taurus transmembrane protein 45A-like (LOC529036), mRNA [NM_001105624]	AATCTTCTGTTCTTGGCCATCTGTTTGACAGCCCTGATTACCTTCATGGAGCTCTTCATA///TTTACCATATACCTCTTCTTTGGGCTGCTGGGTGTGACAAACATCTTATGTTCCACCATC
A_73_112417	0.0352242	0.00222408	up	1.65512	1.65512	0.726937		Rep: 2-oxoisovalerate dehydrogenase, E1 component, alpha and beta subunit - Salinibacter ruber (strain DSM 13855), partial (3%) [TC410451]	TTCAGTCTGCTCCTTTGTCTGGAAAATGGATGATGTGATCATTAAGGTCCCCTTGGCTCT
A_73_105698,A_73_P131006|523360	0.0321117	0.00187093	up	1.65504	1.65504	0.726862	CARD14	Bos taurus caspase recruitment domain family member 14 (CARD14), mRNA [NM_001205901]	TGAGCTGGATAAAGTGCCCTGTCTATATAGCAGCCTGGCCCCCGAAAGCTGGAGTGACCT///AGTGTCTGTGTCCTGCACAGGATGGAGATTTTCCCCATCATTATCCATGTCTCCATCAAT
A_73_P116816,A_73_119688,A_73_P383931|615342	0.0420545	0.00308482	up	1.65397	1.65397	0.72593	BNIP3	Hw_Fat_52_B05 Bos taurus CF-24-HW fat cDNA library Bos taurus cDNA, mRNA sequence [DV781287]///Bos taurus BCL2 interacting protein 3 (BNIP3), mRNA [NM_001076366]	CCCCTTTCATACACTGTAAAAATTGCTGGTTGTAATTGCTTTCCTTTTTCCCACCCAAAA///CATCTTCTCTGCGGAGTTCCTCAAGGTCTTCCTGCCGTCGCTGCTGCTGTCCCACCTGCT///CAACGAGCATGTTGTTGATTAATACCTACTGTAATAATTCGGTAGTAACCTTCTTCAGAT
A_73_P271881,A_73_120672|506337	0.00787086	9.29759e-05	up	1.65315	1.65315	0.725213	PPP1R32	Bos taurus protein phosphatase 1 regulatory subunit 32 (PPP1R32), mRNA [NM_001038044]	AATTCCAAGTATCTCAAGGAGCCGTCACATCAGCCGGATCTCTTGCAGAAGAATTCAGTT///CTATTCCCACATCCCCCCGGGGGCTCCCCAGCTACTTTCCTAATGAAATAAAATCAGTGA
A_73_107468|282420	0.00633994	5.29073e-05	up	1.65307	1.65307	0.725147	CSNK2A2	Bos taurus casein kinase 2 alpha 2 (CSNK2A2), mRNA [NM_174636]	CTGGTTCGTCCTGTGGCCACCTGTTTTTCCAGCAGACCACGTTAACCAGCTGACCAGACT
A_73_120398,A_73_P478588,A_73_113213,A_73_P096976,A_73_P106151|526956	0.00542407	3.16643e-05	up	1.6526	1.6526	0.72474	ACAD11	Bos taurus acyl-CoA dehydrogenase family member 11 (ACAD11), mRNA [NM_001075893]///Rep: Acyl-CoA dehydrogenase family member 11 - Pongo pygmaeus (Orangutan), partial (74%) [TC419607]	TTGGCTCAGTTACATTCCTTGAATATACAGTCATTGCAGCTGGAAGGATATGGTAGAGGT///ACCAATTTAATACTAGGTGAAGGTAGGGGATTTGAAATTGCCCAAAGCCGGCTTGGACCT///AAACACACTACTTGTAAAGAAATCATGAAGTAGATTGGAGAACTAAATCATAAGCATAAA///AAGAAAGAGATTGCAATGATTAAAGTGGCTGCCCCCCGTGCCGTCTGCAAAATTATTGAC///GCCTTCTATAAGGCATCCTTTTTTAGGTGGATAAAATCTTATAACCCAAGCTATTCAATC
A_73_P434931,A_73_113983|514933	0.022407	0.000916773	up	1.65251	1.65251	0.724661	EBI3	Bos taurus Epstein-Barr virus induced 3 (EBI3), mRNA [NM_001100365]	TCAGCAGCAGCTTCGTGCCCTTTGTCCCAGAGCACATCATCAAACCGGATCCTCCAGAAG///TGTGTTCCCTCCTGCCTTTGACAGAGTGCAATGCTTTGAGAACTGTGAATATGAGATTTT
A_73_P066496,A_73_P066491,A_73_P420531|789422	0.010051	0.000174263	up	1.6517	1.6517	0.723953	UBE2O	ubiquitin conjugating enzyme E2 O [Source:HGNC Symbol;Acc:HGNC:29554] [ENSBTAT00000026793]///ubiquitin conjugating enzyme E2 O [Source:HGNC Symbol;Acc:HGNC:29554] [ENSBTAT00000055194]	TTTAAGAAAATTGAGTTCCAGCCTCCAGAAGCCAAGAAGTTCTTCAGCACAGTGCGGAAG///GTGGAGATGTGAATGCCTATTGCTTAAGATATCTGTATAAAGTGCTGTGTGATTAAACTT///AGAAACAGCTTGTGAGGATCACATCTTGCTCCCCGGACGTCCAGTGCTCCAGGGACCATT
A_73_P258181,A_73_P037121,A_73_P324326,A_73_P254421|528013	0.0101352	0.000177025	up	1.65071	1.65071	0.723088	SMTN	Bos taurus smoothelin (SMTN), mRNA [NM_001076879]	TGATGCAAACTAAGACCTTCTCCTCTTCATCATCCAAGAAGATGGGCAGTATCTTCGACC///TGTCGCGGCACCTTCCCACGCAAACACGCAGCGTTTTGATAAATTATTGGTTTTCAACGA///AACAAGATGCTGGATCAGACTACGGACTTTGAGGAGCGGAAGCTCATCCGGGCTGCACTG///ACCATGTGAGGTGCCGAAGCCAGAGGAACAGAAGCAGCAGGTGGAGGTCCCAGAGCCAAC
A_73_108387	0.0319086	0.00184275	up	1.6492	1.6492	0.72177		Rep: Immunoglobulin superfamily member 10 precursor (Calvaria mechanical force protein 608) (CMF608). - Canis familiaris, partial (93%) [TC399019]	CTGAGGGCTCCATTTTTCCTAAGATAACTTCCTCTCTGTCTCACCAAGCAAATTATCAGG
A_73_P413886,A_73_116625|508534	0.0314938	0.00180175	up	1.64845	1.64845	0.721107	SLC22A31	Bos taurus solute carrier family 22 member 31 (SLC22A31), mRNA [NM_001101901]	ACTGCTGCTGCTCTTTTGGGGGTTTCCAGCCATGTTCCCCGAGTCTCCCTGCTGGCTGCT///GCTCACCACAATGCACGGCCGGCATGGCTTCTTCCTGCAACACGTGCTTTTCGCATCTTT
A_73_114350	0.0258412	0.00123086	up	1.64844	1.64844	0.721098		Rep: AT-hook-containing transcription factor. - Bos Taurus, partial (6%) [TC446870]	AACCCTGTAGCAGCTCAGACCTCAGCTTTTCTGGAATGTGTGTGCATCACTGATATTTGT
A_73_100524,A_73_P491663|282134	0.0284593	0.00147052	up	1.64814	1.64814	0.720838	ADRA1A	Bos taurus adrenoceptor alpha 1A (ADRA1A), mRNA [NM_174498]	TTACTCCACAGCCTTTTCAACATGGCATAGAAAGGCTTTTCTTGGCAAATCACTTACCTT///AACGCTGGGCATCGTGGTCGGCTGCTTCGTCCTCTGCTGGCTGCCTTTTTTCTTAGTGAT
A_73_116245|281207	0.0499097	0.00429243	up	1.6472	1.6472	0.720012	NPBWR1	Bos taurus neuropeptides B and W receptor 1 (NPBWR1), mRNA [NM_174074]	AGCCTGAGCTACGCCAACAGCTGCCTCAACCCTTTCCTCTACGCCTTCCTGGACGACAGC
A_73_P411581,A_73_P063031|506141	0.0154355	0.000409957	up	1.64618	1.64618	0.719118	IRF4	Bos taurus interferon regulatory factor 4 (IRF4), mRNA [NM_001206162]	TGAAAATGGTTGCCAGGTCACAGGAACCTTTTATGCTTGTGCCCCGCCTGAGTCCCAGGC///TATTTTGCTCAGCAAAACAGCGGACACTTCCTCAGGGGCTATGACCTGCCCGAGCACGTC
A_73_105949,A_73_P122746|616955	0.0327405	0.00193751	up	1.6453	1.6453	0.718347	NRGN	Bos taurus neurogranin (protein kinase C substrate, RC3) (NRGN), mRNA [NM_001113313]	TAAGGCCGTGCCCTTTTAGTTAGCTCTCCAGTCTCGTATGGTCCCCGTTCGCCCTTCCTC///TCCAGGCGAGTTTCCGGGGCCACATGGCAAGGAAGAAGATAAAGAGCGGAGAGCGTGGCC
A_73_102557|512922	0.0147158	0.000373461	up	1.64433	1.64433	0.717503	SPSB4	Bos taurus splA/ryanodine receptor domain and SOCS box containing 4 (SPSB4), mRNA [NM_001192337]	ACGGCACTGCCTCCTGCCACCTTAATGTGAATTGACTGATGAATGAAGAGCGTTTCTAAT
A_73_112963	0.0480907	0.00399074	up	1.64384	1.64384	0.717069		LB02629.CR_D21 GC_BGC-26 Bos taurus cDNA clone IMAGE:8220647, mRNA sequence [DV884013]	TGAGGGTTCTAGCCTCTTATGGGGTCAGGGTTGCACCTCTCAGGCTCCTGCTCTACTGTA
A_73_115331|506075	0.0272735	0.00136297	up	1.64211	1.64211	0.71555	ARHGEF25	Bos taurus Rho guanine nucleotide exchange factor 25 (ARHGEF25), mRNA [NM_001024481]	AGGTTCCTTCAGCTCCCACCCCTATGCATGCATCACAGGTCCCCCCAAAAGGAGGATATG
A_73_P072866,A_73_110940|534010	0.0310801	0.00173976	up	1.64185	1.64185	0.715319	SOX17	Bos taurus SRY-box 17 (SOX17), mRNA [NM_001206251]	AGCTACTCGGGGAGGTGGAGCGCACGGAGTTCGAACAGTACCTGCACTTCGTGTGCAAGC///TGTCCTCGGTGGTGTCCGACGCCAGCTCCGCGGTGTATTACTGCAACTATCCCGACGTGT
A_73_P488108	0.022407	0.000914658	up	1.64154	1.64154	0.715053			ATCACTGTCACTAGTGCTATCACTGCAAGGTGCCCCAGGCTCAACCCCTGGTTCCTGTGA
A_73_P067381|522431	0.0212657	0.000816379	up	1.63859	1.63859	0.712451	FFAR2	Bos taurus free fatty acid receptor 2 (FFAR2), mRNA [NM_001163784]	AAGCTGTCGTATTTGGTAGCCTCAATGCCAGTCTGGACCCCTTGCTTTTCTATTTCTCTT
A_73_P100481,A_73_118948|281343	0.0178377	0.000559403	up	1.63729	1.63729	0.711305	MYOG	Bos taurus myogenin (MYOG), mRNA [NM_001111325]	ACTCAAGAAGGTGAATGAAGGCTTCCAGGCCCTCAAGAGGAGCACCCTGCTCAACCCCAA///GGCAGGGGCTCCTGGGGTGATTAATTTTGTTAACTAAGCATTGTGTGGTTTTGCCATTGT
A_73_102619	0.0256508	0.00121468	up	1.63689	1.63689	0.710955		Rep: LOC783604 protein - Bos taurus (Bovine), partial (18%) [TC428096]	CATGGTTGCCAGCATATAGTAGTGCTCAGCAAATCCAGTTCTCTTCCTTCCTTTCCTTTG
A_73_P066831,A_73_P160672|528171	0.0142243	0.000352315	up	1.63685	1.63685	0.710918	ZCCHC14	Bos taurus zinc finger CCHC-type containing 14 (ZCCHC14), mRNA [NM_001205953]	CAAGGTACTTTTAGGTTGAAATATGCCCCTCCAGCAGAAAGTCTGGACTCCACAGATTGA///TTCTAACAATGTGCAAATAAGTGTGCCCCCTGCAATAATAAACCCCCGGACTGCTCTGTA
A_73_P041356|538314	0.00969218	0.000161503	up	1.63611	1.63611	0.710273	TBCCD1	Bos taurus TBCC domain containing 1 (TBCCD1), mRNA [NM_001083730]	GAAGGTGCTCTTGCTGCTCTCAACTTTGGAGATTTTTCTTCCTATTTAAGACCTTTATGT
A_73_121201|520410	0.0181782	0.000594326	up	1.63605	1.63605	0.710219	LRRC10B	Bos taurus leucine rich repeat containing 10B (LRRC10B), mRNA [NM_001204828]	GGCAGTCGTCAGGCCAAGAAGCCCCAGCTCTTTCCACCTATAGCTCCTCTGGCCCCTGAT
A_73_100907	0.023624	0.000997781	up	1.63465	1.63465	0.708986		PREDICTED: Bos taurus dapper, antagonist of beta-catenin, homolog 2 (Xenopus laevis) (DACT2), mRNA [XM_001254756]	TGTAGCCTCCCCCTTCAGGAACATAGCTGGTGGTCAGCAAACCCTTGTCCTTCACACCGT
A_73_P206427	0.0402976	0.00284692	up	1.63423	1.63423	0.708615			TGAACTTCCTCTTCTGTTCCAAATTGCCCTCATGGGTGCGGCATGCCTGGGTGAACCTGG
A_73_104151|508202	0.00307331	2.80986e-06	up	1.63404	1.63404	0.708445	KRT79	Bos taurus keratin 79 (KRT79), mRNA [NM_001075348]	CTGAATCTACCTATGTCCCCCTCCCCTGTCTGTGCTGTGATGTATCTCAATAAATGGAAA
A_73_P485368	0.0490149	0.00414655	up	1.6335	1.6335	0.707964			TTTCCTTCCGGGCCAAGTCCTGGAGCACCTTGAGCTCCTTGGCTGCTTTGCTTTTGAGCA
A_73_111039|523101	0.0426585	0.00317301	up	1.63301	1.63301	0.707532	SOWAHD	sosondowah ankyrin repeat domain family member D [Source:HGNC Symbol;Acc:HGNC:32960] [ENSBTAT00000065997]	GCAACCGGGTGGCGCAAATTCAAGGCCTCCTCCGCCATATGTTCCCCTTCTTCCAGGACC
A_73_P225187	0.0238748	0.00101893	up	1.63211	1.63211	0.706737			TATTAAGGTACAGGCCCAGCTCCTTTTCCTTCTTGCTGCCCATGTCATATGGATATTGGA
A_73_121341|282264	0.0465181	0.00369825	up	1.63143	1.63143	0.706134	KCNK17	Bos taurus potassium two pore domain channel subfamily K member 17 (KCNK17), mRNA [NM_174558]	TCTTGACGTTTGCAGAGCCACCATAACAAACCTGGACTGGATTCCACCAGACTTCATTTA
A_73_102926,A_73_P205047|530005	0.0147128	0.000371154	up	1.63001	1.63001	0.704883	WNT5A	Bos taurus Wnt family member 5A (WNT5A), mRNA [NM_001205971]///PREDICTED: Bos taurus wingless-type MMTV integration site family member 5A (WNT5A), transcript variant X1, mRNA [XM_005222857]	GTTGCTTGGGGGACGGCTGGAAGGGCAATGTCTTCCAAGTTCTTCCTAATGGCTTTGGCC///GGCCCCGCTCCCAGGACCCACTTATTTATAGAAAGTACAGTGATTCTGTTTGGGTTTTTT
A_73_117528	0.0198036	0.000695763	up	1.62889	1.62889	0.703886			TTTGCACAATGTTTTCCTGTTTGTGTAAATCAAAGCACTGTACATGTTACTCTGTGTGTG
A_73_P081366,A_73_111352,A_73_P379786|541106	0.0331478	0.00198182	up	1.6272	1.6272	0.702392	RRAGD	Bos taurus Ras-related GTP binding D (RRAGD), mRNA [NM_001192828]	GTTTGTTGTAAAAAACTCAAGAAGAAGAAGGAGATTGGGACATATGACATACGTTTGTTG///CATTACACAAATGTAAACTTTTATGGTCTGTAGTCAGAAAAAATCCTGTGTTCGTACTGC///TTGCTTCCGGAAGGCCATCCATGAAGTTTTTGAGGTGAGAATGAAAGTAGTGAAATCGCG
A_73_P092366,A_73_103308|533048	0.0489192	0.00411735	up	1.62631	1.62631	0.701605	NPR1	Bos taurus natriuretic peptide receptor 1 (NPR1), mRNA [NM_001192751]	TGATGCCGTCATAGACAATTTTGACGTATACAAGGTGGAGACCATTGGTGACGCCTACAT///GCTGGCTTTGGTGGGGAGCCTCTCCCTTCTCAGCATCCTGATCGTCTCCTTCTTCATATA
A_73_P429581,A_73_P038611|768003	0.0252609	0.00115525	up	1.62337	1.62337	0.69899	ZC2HC1B	Bos taurus zinc finger C2HC-type containing 1B (ZC2HC1B), mRNA [NM_001077063]	GATTTGCTAAATCTTCTAAAAAAGATTAACTCCTAGAGGCCAGCCTGGTTCCCTCACCGT///CACGCCTGCGATTTCTTTGGAGACAGCATGTAGAACAAGTAAAAACTATGTTCAAATTTT
A_73_116963,A_73_P112816|317651	0.00806579	0.00010081	up	1.61973	1.61973	0.695756	CATHL6	Bos taurus cathelicidin 6 (CATHL6), mRNA [NM_174832]	TTGGGGTAAATTGTGAGCCCATGGAAGAATCCTGTGTGTGTCCTCCCTGGCTCAGGCTTT///AGGACGATGAGAACCCAAACATCCCGAAGCCTGTGAGCTTCAGGGTGAAGGAGACCGTGT
A_73_103097|535623	0.0243167	0.00105447	up	1.61955	1.61955	0.695591	RHBDL3	rhomboid like 3 [Source:HGNC Symbol;Acc:HGNC:16502] [ENSBTAT00000027954]	CAGTCGCTGTGGTGGATTTTTGTGGCCATGTACACCGTCTTCGTGCTGTTCGCTGTCTTC
A_73_104684,A_73_P424061|505394	0.0159836	0.000453141	up	1.61946	1.61946	0.695516	APOA2	Bos taurus apolipoprotein A2 (APOA2), mRNA [NM_001045916]	CGCTGGCCAGGCCTGAGGTGCCTCTCCCTGCCCACTCCTTGTTTTCTACAATAAACTTTG///AAGAAGGCTGGGACTGACCTGCTTAACTTCTTGAGCAGTTTTATAGACCCCAAAAAGCAG
A_73_109935,A_73_P056696,A_73_P402176|615757	0.030656	0.00168898	up	1.61779	1.61779	0.694024	COX8B	Rep: Cytochrome c oxidase polypeptide VIII-heart, mitochondrial precursor - Bos taurus (Bovine), complete [TC410162]///Bos taurus cytochrome c oxidase subunit VIII-H (heart/muscle) (COX8B), mRNA [NM_001114517]	GCGGGCCCCACACCTGGCACAGACAGGAAGATCAGATTAAAGCCCTCCTCTTTCTCCTTT///GAGCTGGGTGTGTGAGATGGGATTGTCCCAGTCAATTTTTACCAGAAGGACATTAAAAAA///TCAGCAGCATGAAGGCTCTGCGGGCCCCACACCTGGCACAGACAGGAAGATCAGATTAAA
A_73_P081876|517953	0.0455455	0.00354221	up	1.61775	1.61775	0.693985	RPS6KA2	Bos taurus ribosomal protein S6 kinase A2 (RPS6KA2), mRNA [NM_001192478]	AGTTCAGGTCCTCAAACACCCTTGGATCGTCAACAGGGAGCACCTGTCCCCAAACCAGCT
A_73_P121816,A_73_101702|509471	0.0298889	0.00160808	up	1.6161	1.6161	0.69252	UBE2L6	Bos taurus ubiquitin conjugating enzyme E2 L6 (UBE2L6), mRNA [NM_001098917]	ATTTTGCACTTGCTCATGTCTTCCAAGATTTCCTTCTTAGGTTGCGTGTGTGTGTACGGG///TTTAGGTGCAAAACCTTTCCGTTTCCACTGATGAATCATAAAGTGAAGAATCTCCTCTCC
A_73_P142801	0.0290754	0.00152451	up	1.6161	1.6161	0.692513		1153545 MARC 7BOV Bos taurus cDNA 3', mRNA sequence [DN274525]	CATCAGATAGGTCCCCCACCCTGTTTTACCCATTCTCTTGATGAATAATGACTGATCTGA
A_73_P193467	0.0319215	0.00185138	up	1.61559	1.61559	0.692061			AAATTAAACATCTAGTTTCTTGCTTTCTTCTTTCATGTCTGGCTCCTCCATTGCCCAGCT
A_73_P093491|100139285	0.0470844	0.00381887	up	1.61455	1.61455	0.691135	KNCN	Bos taurus kinocilin (KNCN), mRNA [NM_001191306]	AAATAAAGAGGGAGCCCGTAGCAGCCTGTCCACCGTGAGCAGAACCCTGGAGAAGCTGAA
A_73_P375641,A_73_116190,A_73_P363201|533087	0.0143912	0.000358094	up	1.61422	1.61422	0.69084	EZH1	Bos taurus enhancer of zeste 1 polycomb repressive complex 2 subunit (EZH1), mRNA [NM_001102151]	TAAGGAGTCTGTGCAGAAGAATGAATTCATTTCTGAATACTGTGGTGAGCTCATCTCTCA///TGGGGATGATGGGGGAGGCTGGTATATGTGCGGCTCTGTTGCCAGTGAATTTCACGCACT///CTATCTCATGTCCAGGTGGAGGCAGAAGGAACTGCCTTTAAACAGCAGAATTGAATGAGA
A_73_P061811	0.0218055	0.000857524	up	1.61322	1.61322	0.689942		dystonin [Source:HGNC Symbol;Acc:HGNC:1090] [ENSBTAT00000061451]	CGGCCCTTCCTGAAGCCTTTACTATTTAAGTCTGAGAGATGTAACATATGATGTAGAGAT
A_73_P113621,A_73_P070896|786852	0.0436649	0.00330611	up	1.61125	1.61125	0.688183	CIT	citron rho-interacting serine/threonine kinase [Source:HGNC Symbol;Acc:HGNC:1985] [ENSBTAT00000061505]	AAGTTAAGGGTCATCTGCTGCAAAGGAAACCTGGTGAAGGAGACCGGCACCGACCACCAC///CAGCCGCCCTCTTTGCACTTTGTTACTCTTTCAGAGCATTCATAAACTTTTGTACCTAGC
A_73_P294026,A_73_P461891,A_73_118729,A_73_P511858|510593	0.0130195	0.000292234	up	1.61116	1.61116	0.688095	PSMB9	Bos taurus proteasome subunit beta 9 (PSMB9), mRNA [NM_001034388]///AM023670 KN-252-lymph, Bos taurus Bos taurus cDNA clone C0007397m20 5', mRNA sequence [AM023670]	CAAGATTCTATGACGAGTGAATCTCCTTCCTCGGACTCTCCTTCTTTATTTTGTAATAAA///TGAGAAACATCACCTATAAATATCGAGAGGACTTGTGCGCACATCTCATGGTAGCTGGCT///TGACGAGTGAATCTCCTTCCTCGGACTCTCCTTCTTTATTTTGTAATAAACTTTCTGGAA///CATGTAGTAGTAGGCATATGGGCAGAAGGGAAGGGAAACCGATTTTTAAAAATAGTTATT
A_73_104000	0.0321292	0.0018744	up	1.61053	1.61053	0.687535		LB03030.CR_F22 GC_BGC-30 Bos taurus cDNA clone IMAGE:8143512, mRNA sequence [EE371282]	GTGGCTCCTTGCGGCGAGAACGGTGACTCTGTATCATGATGCGTGTGGCTTCCTGTTCTC
A_73_115729,A_73_P411496,A_73_P459006|280838	0.0130259	0.000293347	up	1.61038	1.61038	0.687403	PAEP	Bos taurus progestagen-associated endometrial protein (PAEP), mRNA [NM_173929]	GACTACAAAAAGTACCTGCTCGTCTGCATGGAGAACAGTGCTGAGCCCGAGCAAAGCCTG///GAAAAAACCAAGATCCCTGCGGTGTTCAAGATCGATGCCTTGAACGAGAACAAAGTCCTT///CTGGGGCCTCCTGCTTGGGGCCGCTCCTCCTTCAGCAATAAAGGCATAAACCTGAAAAAA
A_73_P135226	0.038175	0.00258641	up	1.61023	1.61023	0.687266		LB01852.CR_C14 GC_BGC-18 Bos taurus cDNA clone IMAGE:8835208 5', mRNA sequence [EH202441]	CAGGCAGGAGCTCTGCCTAGTATGTATTTATTTATTTGTGAATAAACTCTGTGCTGGTGT
A_73_108122	0.0372265	0.0024537	up	1.60693	1.60693	0.684311		Rep: Sodium sulfate cotransporter-2 - Rattus norvegicus (Rat), partial (5%) [TC463964]	AACCCATGACCTGCACCTCCCTCGAACTGCCGCTTTCAGGAAGCCTTTTGGATCCAAATG
A_73_P032771,A_73_P429736|100313956	0.0403204	0.00285121	up	1.60552	1.60552	0.683037	IFNT3	Bos taurus interferon tau-3 (IFNT3), mRNA [NM_001168275]	TCTTCATCAACCACCTTGCAAAAAAGGTTAAGAAAGATGGGTGGAGATCTGAACTCACTT///GCCTGCCCTGATGTTATCTGTTGTTGATTTATGTATTCCTTCTTGCATCTAACATACTTA
A_73_P492963,A_73_119565|616092	0.00896962	0.000125779	up	1.60445	1.60445	0.68208	LOC616092	Bos taurus gamma-crystallin F-like (LOC616092), mRNA [NM_001206819]	ATCCATTCCTTCAATGTGCTGGAGGGCTGGTGGGTCCTCTACGAGATGACCAACTACCGG///ACTGGGGGGCTACAAATGCCAGAGTGGGCTCCTTGAGGAGGGCCGTGGATTTCTATTGAA
A_73_P096791|785659	0.0390584	0.00269896	up	1.60365	1.60365	0.681363	SIAH2	Bos taurus siah E3 ubiquitin protein ligase 2 (SIAH2), mRNA [NM_001207054]	ATAGCGCATCTTTTTGCAGATAATGGGAACCTTGGCATCAATGTGACTATTTCTACATGT
A_73_P115371|782109	0.021089	0.000801194	up	1.60232	1.60232	0.680158	NMU	Bos taurus neuromedin U (NMU), mRNA [NM_001191153]	TATTCGAAGACTCAAAAGTTGGGCAATTCAAATGTTGTGTCGTCTGTCCTGCATCCGCTG
A_73_P368816,A_73_P034301|506895	0.00547052	3.29361e-05	up	1.60196	1.60196	0.679835	HAX1	Bos taurus HCLS1 associated protein X-1 (HAX1), mRNA [NM_001045953]	ATAACTTCGGCTTTGATGACCTAGTACGGGATTTCAATAACATCTTCAGCGAGATGGGGG///AACTGAAGGTCTGTCAGTTTGTCAGTCACCCAAACTGACCAATAAAACCTTTATTTATGC
A_73_P033956,A_73_115978|281350	0.00489332	1.80902e-05	up	1.60099	1.60099	0.678964	NGF	Bos taurus nerve growth factor (NGF), mRNA [NM_001099362]	CGCCCCTCCCTACCTCAACCTGTAAATTATTTTAAATTATAAGGACTGCATGATAATTTA///ACAGCGGGTGCCGAGGCATCGACGCGAAGCACTGGAATTCGTATTGCACCACGACCCACA
A_73_P486078	0.0281409	0.00144549	up	1.60042	1.60042	0.678447		Rep: Vacuolar proton pump subunit d 1 - Homo sapiens (Human), partial (29%) [TC467711]	TTATTACCAGAGCCCAGCCTTCGCCTTGTTTGCACAGGGCTCCCTCAGCTTCCTGGTGAA
A_73_105487|282425	0.0406923	0.00291158	up	1.6001	1.6001	0.678159	CYP21A2	Bos taurus cytochrome P450, family 21, subfamily A, polypeptide 2 (CYP21A2), mRNA [NM_174639]	CCTGACTCCCCTTTTCCTTTTAAACCCTCAACTGCAAAGGACTGAAGCAGAATCCTGAGC
A_73_P085816	0.0494113	0.00421379	up	1.59939	1.59939	0.677523		glycine receptor alpha 3 [Source:HGNC Symbol;Acc:HGNC:4328] [ENSBTAT00000061342]	CCATCTCCCGAGCCTGCTTCCCATTAGCCTTTTTGATTTTTAATATTTTCTACTGGGTTA
A_73_P407376	0.0489192	0.00410849	up	1.59935	1.59935	0.677487		PREDICTED: Bos taurus KIAA1161 ortholog (KIAA1161), mRNA [XM_607425]	GTAAGACTCCTGAGACCCTCGCAGCCGCAACCATGTACACCTTCTTGCCTGACAACTTTT
A_73_P161132,A_73_P055446,A_73_106230,A_73_P163292|527014	0.00619337	5.00322e-05	up	1.59826	1.59826	0.6765	SV2B	Bos taurus synaptic vesicle glycoprotein 2B (SV2B), mRNA [NM_001083448]	CGTGTTTATTATAATGGTCAGACCCATGGAAATCTACTCTGTGTGTCTCAGTTCTGCTTC///TATGTTTGTAACTCAGGTGACTGATTTGGGGATTTCCTGAGCTGTCCTCCCGTAGAATCT///CTGAGGTCATGTAATAAATAATCTCTTTCCCAGGGTTTCCTGGCCCCTTGTATTAGTTCA///TTATTGAAACAGCCCAAACCTCTATCATAGTGAAGGGAATATAGCTCAAGAGGCAAGCAG
A_73_P298296,A_73_P430501,A_73_P349056,A_73_P279441,A_73_P040331|512464	0.0447545	0.00343723	up	1.59765	1.59765	0.675951	LOC512464	Bos taurus solute carrier family 11 (proton-coupled divalent metal ion transporters), member 2-like (LOC512464), mRNA [NM_001046121]	TCACTTGTAGGGGATGGTAACTAATCTGTTAGAAAATCACTTGAACAATTTTCTGCAGAG///GGTGGCTTGATCCATATTAATAAAAATCATGAGATAATCTACCCCTATCAGGTTCAGGAT///TCAAAGCCATTGTGCAAGTTTAGTGTTGAAATCTACTAGTGTTGGAGGGTCTCCTCTAGA///CATTTTTTGGTTTTATCTTCACTGTTATGGCCCTCACATTTGGCTATGAGTATGTTACAG///TATCTGAGCTTTGTGTTTTACTTGGGTTGGCAGTGTTTCATTGCACTGGGCATGTCCTTC
A_73_101073	0.00559518	3.45395e-05	up	1.59748	1.59748	0.675802		HW_LOIN_129_B07.ab1 HW cDNA library longissimus dorsi Bos taurus cDNA clone 129_B07, mRNA sequence [GH327780]	CACCACACGGTGAAATCTCTCCTTTACCTAATATGCAGACCTCTTCAGTATGTACCTGGT
A_73_104217,A_73_P149681|509554	0.00994426	0.000170897	up	1.59554	1.59554	0.674044	GPR182	Bos taurus G protein-coupled receptor 182 (GPR182), mRNA [NM_001206417]	CAAGCCTGAACTTCCAGGCAGCAAATACCCTACCCACCTCCGCTCCTCAGTCTCTTGTAG///TGAGCCCATGTGCCTCTTCATGGCGCCTTTTGAAACATACAGCACATGGGCCACGGTGGT
A_73_P055976|616821	0.0118189	0.000234615	up	1.59517	1.59517	0.673712	MID2	Rep: Midline-2 (Midline defect 2) (Tripartite motif-containing protein 1) (Midin-2) (RING finger protein 60). - Bos Taurus, partial (92%) [TC445259]	AACAAATCCCTAATGATCCTGTCTGGCTTGCCTGCCCCAGATTTTATTGATTACCCTGAG
A_73_P046001|280711	0.024091	0.00103391	up	1.59516	1.59516	0.673702	ACR	Bos taurus acrosin (ACR), mRNA [NM_173886]	AAGATAGGCTCTAACACGGTGCACATGATTCAGTTGCCCACCGCTCCCCCTGCTTCTACT
A_73_P162207	0.0120321	0.000250993	up	1.5944	1.5944	0.673014		Rep: FERM domain-containing protein 1. - Canis familiaris, partial (75%) [TC410559]	GAGGTGCCCAGCAGGCCTCACCTGCCCTGCCGTGGGGACCATGGCCAGTCTGAGCTCCTT
A_73_113068,A_73_P447341,A_73_P327701|511654	0.00762091	8.43291e-05	up	1.59229	1.59229	0.671101	CHAF1B	Bos taurus chromatin assembly factor 1 subunit B (CHAF1B), mRNA [NM_001098014]	AGAGATATGTCACCTCTTGTATTTAGGATACTTTTTCCCTCGGAGATGTGAACATCTTAA///AGGAGACAGTACTTTGAGGTTTATTCCATTGGGTTTTAGTGTGTTGGATTATTTGATCAA///AATGTGACAAACACGACTTACGTTTTCTCCAGGAAAAATCTTAAAAGGCCCATCGCCCAC
A_73_P494458	0.0330359	0.00196884	up	1.58918	1.58918	0.668284			ATCTCTTCAAACACTGAACCAGAGCCCCTCCCCCTTGGCTCTCTGACATTGTGTGGGTGG
A_73_P068791,A_73_P085876,A_73_P085882,A_73_P102871,A_73_P085871|445419	0.0211502	0.000805129	up	1.5884	1.5884	0.667572	FZD3	Bos taurus frizzled class receptor 3 (FZD3), mRNA [NM_001192964]	ATTGGATGCTACTTTTATGAGCAAGCTTACCGCGGCATCTGGGAAACAACGTGGATACAA///TAATCCTATGACTCACATCACACATGGCACCAGCATGAATCGGGTTATTGAAGAAGATGG///GATCTCATAACAAAGCCTGTACCATGCTTTTTATGGTACTCTACTTTTTTACTATGGCTG///TACCATGCTTTTTATGGTACTCTACTTTTTTACTATGGCTGGCAGCGTTTGGTGGGTAAT///ATGACTCACATCACACATGGCACCAGCATGAATCGGGTTATTGAAGAAGATGGAACCAGT
A_73_P109866,A_73_101543|281674	0.035681	0.00227603	up	1.5868	1.5868	0.666122	CD79A	Bos taurus CD79a molecule (CD79A), mRNA [NM_174266]	AAGACGAAAATCTCTATGAGGGCCTGAACCTTGATGACTGCTCCATGTATGAGGACATCT///CTCCCCTCTGCCTGCTCTGTCATGGCCACTTAGTGATAATAAATCCTTCCCAACGGCAAA
A_73_108372	0.0380952	0.0025781	up	1.58602	1.58602	0.665407		5-hydroxytryptamine receptor 3D [Source:HGNC Symbol;Acc:HGNC:24004] [ENSBTAT00000056946]	TCTTCCGTCTCTACCTGCTCTTCATGGCCACCTCCGTTGTCACAGTTATTATTCTCTGGA
A_73_P309126,A_73_103715|404111	0.0208132	0.000771322	up	1.58441	1.58441	0.663946	KRT14	Bos taurus keratin 14 (KRT14), mRNA [NM_001166575]	TACGAGAAGATGGCGGAGAAGAAACCGCAGGATGCCGAAGACTGGTTCTTCAGCAAGACA///CAAGCACTTGACTCGTGAGCCCTGTTTCACCCTTGCCCCTTCCAGCAATCAATAAAGCTT
A_73_P118856	0.0457787	0.00359176	up	1.58409	1.58409	0.663651		1391544 MARC 7BOV Bos taurus cDNA 5', mRNA sequence [DN542763]	GTGAAGTGGAGGTAAATTCTTGTCCCTGTGGTATTGTACTTCAAAGTGTTTGTAACATGC
A_73_P353531,A_73_P038721|535273	0.0195569	0.000677988	up	1.5839	1.5839	0.663481	EMP3	Bos taurus epithelial membrane protein 3 (EMP3), mRNA [NM_001024562]	TTCATGTTCCAGCTCTACACCATGCGGCGAGGAGGGCTATTCTATGCCACTGGCTTCTGC///CGCAAGCCCCCACCCTTCCTCCTTTTCTATTTTAAACAGAAAATAAAACTGTTTAGCCGC
A_73_105911|537630	0.0479579	0.00396704	up	1.58338	1.58338	0.66301	GPR180	Bos taurus G protein-coupled receptor 180 (GPR180), mRNA [NM_001164031]	CACAGTCTGTACTGGGAAGTTTCTTCACTTTCCTCAGTAACACTACCACTGACCATATCA
A_73_108640|281345	0.00900926	0.000137925	up	1.58331	1.58331	0.662942	NCF1	Bos taurus neutrophil cytosolic factor 1 (NCF1), mRNA [NM_174119]	CATTTGATGCTCTCCTCACCCCCAGCCCCTAAACCTGTACATACGTGTATAGAGCCTGAG
A_73_105085|531865	0.0135523	0.000315922	up	1.5814	1.5814	0.6612	OAZ3	Bos taurus ornithine decarboxylase antizyme 3 (OAZ3), mRNA [NM_001172708]	GACCACCCAGCCCTTCCTCCCTGGGACAATGTCATCTTTATGGTGTATCCCCTTGAAAGG
A_73_116386|524975	0.0314658	0.00179469	up	1.58067	1.58067	0.660537	XKRX	Bos taurus XK related, X-linked (XKRX), mRNA [NM_001205914]	TGCCTTGCAGCTCATTATTGCTTATCTGATTTCCATTGGCTTCATGCTCCTGTTCTTCCA
A_73_104467|505314	0.00748857	7.80853e-05	up	1.58047	1.58047	0.660352	UBE2T	Bos taurus ubiquitin conjugating enzyme E2 T (UBE2T), mRNA [NM_001038034]	CTTTACGTTGATTCTTTGAGAGTTATTTTATTTACCTTGTGCATATTGATTTTAAAACTC
A_73_109811	0.00542407	3.18297e-05	up	1.58018	1.58018	0.660086		LB01645.CR.1_G22 GC_BGC-16 Bos taurus cDNA clone IMAGE:8382576 5', mRNA sequence [EH172310]	GTAAGCTTTGCCTCCCTCCTAGCTATATTGTGTTAGTCCCATATCCTTTGGATTCCTGCT
A_73_103042|535342	0.00409472	5.1683e-06	up	1.57906	1.57906	0.659063	SLK	Bos taurus STE20-like kinase (SLK), mRNA [NM_001206077]	AGCATGCTGTGGTTGGGTTTGGCTTTTTAAGTACGTCATTCTGTTCTCTTCATCTTTAGC
A_73_P402746,A_73_112347|614878	0.0274321	0.00138205	up	1.57784	1.57784	0.657954	TRPV6	Bos taurus transient receptor potential cation channel subfamily V member 6 (TRPV6), mRNA [NM_001206189]	TCTGCCAAGTGTAACGAACTCCTCCAAGGGAGGCCTCTTGTGTCTGGCTGCTTACACCTC///GATGAGCTCTGGAGAGCGCAGGTTGTAGCCACCACTGTGATGCTAGAGAAGAAGCTGCCA
A_73_P118641,A_73_P051026|509613	0.0227689	0.000942173	up	1.57763	1.57763	0.657757	EIF4EBP1	Bos taurus eukaryotic translation initiation factor 4E binding protein 1 (EIF4EBP1), mRNA [NM_001077893]	TCTTCTTCGTGGACACCAGCACATACCTCCGTGTGCCTCCAACTCTGCAGGAACTAGTAC///TGTGTGGGGAAAGCTCCCCACCCCCTCCCTTCCTGAGAAAGGAAATAAAAGCCACCTTCG
A_73_109618	0.0390584	0.00269984	up	1.57733	1.57733	0.657487			AGAGGGGTGAAGCTTGCCTCTCTATGCAGTAACCCTTCTCAGATTTCAGCCATAATGAAT
A_73_119072,A_73_P111641,A_73_P266796,A_73_P110441|527921	0.0126869	0.000279429	up	1.57647	1.57647	0.6567	RASD2	Bos taurus RASD family member 2 (RASD2), mRNA [NM_001081594]	TGTGTACATTGTACCCACGTATATACCTGTACACACACGTGAACACACAGAGAGACACGT///GGCCCGCTTCCCTGTATCTCTGTGTACACTCTCGATTAAAGTGGGTTTGTTTCTAAAAAA///ACAAGACCAAGGAGGCAGCGGAGCTGCCCATGGTCATCTGCGGTAACAAGAATGACCATG///TGTACATTGTACCCACGTATATACCTGTACACACACGTGAACACACAGAGAGACATGTGC
A_73_114326|509757	0.0426631	0.00317738	up	1.57528	1.57528	0.655609	ODF3	Bos taurus outer dense fiber of sperm tails 3 (ODF3), mRNA [NM_001080252]	CCCTGTCGTCTCCTTTGGCATCAAACACTCTGACTACATGACGCCCCTGGTCGTGGATGT
A_73_115069	0.047643	0.0039051	up	1.57442	1.57442	0.654824		synaptotagmin 8 [Source:HGNC Symbol;Acc:HGNC:19264] [ENSBTAT00000056660]	ACAACGAGGCCTTCACCTTCCTCGTGCCCTTCAGCCAGATCCAGCGTGGATCTGGTGCTG
A_73_103641,A_73_P050181|281665	0.00542407	2.76866e-05	up	1.57215	1.57215	0.652743	CCKBR	Bos taurus cholecystokinin B receptor (CCKBR), mRNA [NM_174262]	GTACGCCTCTGCCTGTGTCAACCCCCTGGTCTACTGCTTCATGCACCGTCGCTTTCGCCA///CACTGTCCTAAAGTGGTCCCCTTGTTAGGGTACTGTATTAATAGATGCTTATTAAAATTT
A_73_P249601	0.0308814	0.00171938	up	1.57141	1.57141	0.65206		PREDICTED: Bos taurus deubiquitinating enzyme DUB1-like (LOC783829), mRNA [XM_001252301]	AGTCGTGATTCACCAGTCCAAACACGGAGGAGGGAGAAACCGCACGCCGCCCCAACAGGA
A_73_P080706|100140640	0.00792986	9.3975e-05	up	1.56979	1.56979	0.650568	LOC100140640	PREDICTED: Bos taurus uncharacterized LOC100140640 (LOC100140640), mRNA [XM_001787354]	ACTTCCATCCTCTTGCTAGGAAACGCCCTCCTGTTCTCCTGTGAAACGTGTTCAATAAAA
A_73_115939|281456	0.0267498	0.00132786	up	1.56916	1.56916	0.649996	RHCG	Bos taurus Rh family C glycoprotein (RHCG), mRNA [NM_174172]	TGTAAGCCAGTGTCTTCCATACCCCCTGAATCCCCTAGACCTCTCTGTGCCATGCAGATG
A_73_P095531|789600	0.0209258	0.000790028	up	1.56823	1.56823	0.649133	WNT4	Wnt family member 4 [Source:HGNC Symbol;Acc:HGNC:12783] [ENSBTAT00000030742]	TCAGGATGCTCAGATAACATCGCCTATGGGGTGGCCTTCTCCCAGTCATTCGTGGACGTC
A_73_117887|510205	0.0122966	0.000259118	up	1.56762	1.56762	0.648578	SERPINB10	Bos taurus serpin peptidase inhibitor, clade B (ovalbumin), member 10 (SERPINB10), mRNA [NM_001098925]	AGACCACCCGTTCCTCTTCTTCATCAGGCACAACAAAACCAACGGCATTTTATTTTATGG
A_73_P203702,A_73_111946,A_73_P087836|513376	0.0285663	0.00147974	up	1.56707	1.56707	0.648074	STBD1	PREDICTED: Bos taurus starch binding domain 1 (STBD1), mRNA [XM_591045]///starch binding domain 1 [Source:HGNC Symbol;Acc:HGNC:24854] [ENSBTAT00000013713]	TTTTGTCTTAATGATCAAAGGCTGGTGTAGAAACAGGGGCCTAATCAGAGTCTGTTACTG///TCTTAGACCAGGGGAGTAAAACAAGCCTTATTCAAAAAGGGCAGATTTCCTACTGGTGCA///GGAAGAATGCAGCAATAGATTCTTGGAGACTGGTCATGAGGATAAAGTGGTTCACAGGTG
A_73_119702|538558	0.011456	0.000219577	up	1.56707	1.56707	0.64807	BRI3BP	Bos taurus BRI3 binding protein (BRI3BP), mRNA [NM_001099087]	TGAGAATGCCGTGCTGCCCTTGTGTTTCGTGGTGGCCATCTACTTCATGACCGGTCCCAT
A_73_112817	0.0227554	0.000939074	up	1.5663	1.5663	0.647359		Rep: Centrobin (LYST-interacting protein 8). - Canis familiaris, partial (11%) [TC454832]	AACCAGGAGTTCCCACCTCTGCTGTCTCCAGTTGTCTCTTCCCTGTGGTCATGGCAGCAT
A_73_P115496,A_73_109100,A_73_P088711,A_73_P425076|507285	0.00672404	6.00863e-05	up	1.56558	1.56558	0.646697	CHN2	Bos taurus chimerin 2 (CHN2), mRNA [NM_001045963]	GTCAGAAGGCCTTTATAGAGTCTCCGGGTTCACAGAACACATTGAAGATGTCAAAATGGC///TTGGTCCCTGTTAGCATCGTTCCTCCCAGCTGTACAGGTTTGTTTGTTGTAGCTTATGTA///CATGACATGCGGTACCAAAAGCTGATTGTGCAGATCTTAATAGAAAATGAAGATGTTTTG///CAAATTTATAGAAGCAGCAAAAATCTCCAATGCGGATGAGAGGCTGGAAGCGGTCCATGA
A_73_116739|535225	0.037972	0.00256453	up	1.56503	1.56503	0.646194	LIMK1	Bos taurus LIM domain kinase 1 (LIMK1), mRNA [NM_001206904]	ACCCCGAATGCTTCATCTGCCTCACATGTGGAACCTTCATCGGTGACGGGGACACCTACA
A_73_108107|540684	0.0088686	0.000119784	up	1.56428	1.56428	0.645498	CEP68	centrosomal protein 68 [Source:HGNC Symbol;Acc:HGNC:29076] [ENSBTAT00000022223]	CTAGCGTGATTTCGTATTTGGGCTCCATTCCCACCTTGGTGCCCCTGTCCACGGATGCTG
A_73_P228227,A_73_P226747,A_73_P261696,A_73_P041246|783495	0.00842574	0.00011021	up	1.5637	1.5637	0.64496	KRTAP10-2	Bos taurus keratin associated protein 10-2 (KRTAP10-2), mRNA [NM_001110186]	TGTCTGTCTGCTCCAGCGACCTGATGTATGACTGTCCAGAGAGCTGCTGCGAGCCCCCCT///TCCACCCTGTCCGTCTGCTCCAGCGAGATGAGCTATGACTGTCCAGAGAGCTGCTGCGAG///ATGTGTCCCCAGAGCCAGCCGAGCTCAGGTTCCACCTATGACTTAATCCTCTGTCCTGAC///ACTTCCAACCAGTCAGCACCCCATCAGGCACCTGGATAAATAAACTCATGTCATCACCTG
A_73_111174	0.0429496	0.0032143	up	1.56362	1.56362	0.644893		Rep: Proteasome (Prosome, macropain) activator subunit 1 - Bos taurus (Bovine), partial (98%) [TC431195]	TTCCACACCCACTCCCTGACCATGCAGGCTGGGGGTGAAGGGTTACAAAGTTCAACCTCT
A_73_118609|616907	0.016099	0.000457639	up	1.56347	1.56347	0.644751	NKX3-2	Bos taurus NK3 homeobox 2 (NKX3-2), mRNA [NM_001193133]	CCTCCTACTATTACCCTTATTACTGCCTCCCCGGCTGGGCGCTCTCCACGTGCGCGGCCG
A_73_P032826,A_73_P107646,A_73_P074281|768232	0.012763	0.000283247	up	1.56294	1.56294	0.644261	DEFB122	Bos taurus beta-defensin 122 (DEFB122), mRNA [NM_001078107]	AAGATAACGTTGCCCTGAGCCTGTCCTCAGCTGATTCCTGGGTTTCATTAAAACGCTTTT///CTGTGCTGTGTCAAGCCCAAGTTTCAGCCAAATACATCGCCACAGTTAATTAATACTTGA///CAAAAATGAAGATAACGTTGCCCCGAGCCTGTCCTCAGCTGATTCCTGGGTTTCATTAAA
A_73_P399776,A_73_P360536,A_73_P069591,A_73_110424,A_73_P102621|281117	0.0124406	0.000268315	up	1.56284	1.56284	0.644166	DLK1	Bos taurus delta like non-canonical Notch ligand 1 (DLK1), mRNA [NM_174037]	GGTGTCCAATCTGCGCTACAACCACATGTTGCGCAAGAAGAAGAACCTGCTGCTGCACTA///CGCCCCCGGGTTCTCAGGAAAGGATTGTCAGGAAATGGATGGGCCCTGCGTGGTGAATGG///GCAACCAACGTAATTGCCAGATGAATCCTCTTTCTCTCTTCTTAATGCATGATATAAAAA///CTCCCCTCTCCTGCCTTTGCGCTGCCGTGTGTGTGCAACCAACGTAATTGCCAGATGAAT///ATCGTGACCAACAGCTGCATCCCCAACCCGTGCGAGAACCAGGGCATCTGCACCGACATC
A_73_P076666|613525	0.0463534	0.00366687	up	1.56095	1.56095	0.642429	SELENOH	Bos taurus selenoprotein H (SELENOH), transcript variant 2, mRNA [NM_001321327]	CGCAAACTCAAGTTTCCGGAGCCTCACGTGGTGCTGGAGGAGCTGAAGAAGTACCTTTCG
A_73_P358531,A_73_P122071,A_73_102856|281360	0.0373347	0.00247696	up	1.5597	1.5597	0.64127	DHRS4	Bos taurus dehydrogenase/reductase (SDR family) member 4 (DHRS4), mRNA [NM_174822]///Hw_liver_26_050721_B03 Bos taurus CF-24-HW liver cDNA library Bos taurus cDNA, mRNA sequence [DV788697]	AGACAGGAGAGCATAAAAGCTACCTTTCAGATCAAAAGGATAGGCAAGCCAGAGGAGTGT///GCCCATATATGTGGACGTCCTTAAGTTTAGAGCATCAAGTTTTTTATATAATTTGGGTCT///GAGATGGGACAGAAGGAACTTGGAGTGGAAGGAACTGAGTTGGAAATTAACAACTTGCAA
A_73_P279941,A_73_105377|505545	0.0137822	0.00032561	up	1.5595	1.5595	0.64108	BSDC1	Bos taurus BSD domain containing 1 (BSDC1), transcript variant 1, mRNA [NM_001035026]	ATTCAGAATTCTGGCATCGGTATTTCTATAAAGTCCATCAACTAGAGCAGGAGCAGGCCC///ATGGGGTTTTTCTCTTTGTAATTATTTCTTTAGTTTAATTAACCTTTTGGTTGTTTGTGC
A_73_111262|519845	0.0311704	0.0017536	up	1.55905	1.55905	0.640671	TOX2	Bos taurus TOX high mobility group box family member 2 (TOX2), transcript variant 1, mRNA [NM_001206688]	TTTTCTGACCCTGCAAATGTCTGTCCTGGTGCCCAGTGCTTCTCTCGAATTTCTTCATAA
A_73_P304436,A_73_P294731,A_73_119497|280699	0.0322214	0.00188346	up	1.55902	1.55902	0.640644	SERPINA1	Bos taurus serpin family A member 1 (SERPINA1), mRNA [NM_173882]	TCTTCGTGGGAAAGGTGGTGAATCCCACCCAAGCCTAACTGCCTCTCGGAGTTCAGCCTT///AAAGCTAGTGGATACGTTTTTGGAGGATGTCAAGAACCTGTATCACTCCGAAGCCTTCTC///CTGCCAATTTACATTTGCCCAAACTGTCCATTTCTGAAACGTACGATCTAAAAAGTGTCC
A_73_114195|531199	0.00969197	0.000159914	up	1.55834	1.55834	0.640011	PLIN5	Bos taurus perilipin 5 (PLIN5), mRNA [NM_001101136]	TTTTCTATCTCGGACTGAGGGGTCCTCAGCTGGACTTGCTGCCCCCACTTGCTTAGCCAT
A_73_P033201,A_73_P346251,A_73_104917|282356	0.00568592	3.65242e-05	up	1.55809	1.55809	0.639778	SLC2A1	Bos taurus solute carrier family 2 member 1 (SLC2A1), mRNA [NM_174602]	CTCCAGGATTTTAACAAAAGACTGTTGCTCAGATCTATTCAGACAAGCAATAGGTTTTAT///ATGCTGATCCTGGGTCGCTTCATCATCGGTGTGTACTGCGGCCTGACCACTGGTTTTGTG///TATCTGGACAAACCAACTTGTAAATATACCACCTTACTCCCTCTGTAACTTACCTAAGCA
A_73_104278	0.0174427	0.000539852	up	1.55809	1.55809	0.639775		Rep: Neuronal migration protein doublecortin - Homo sapiens (Human), partial (42%) [TC458992]	AAGAGAAAAGTGTCGCTCCACATCCTGCTCCTCATCCACCACACAGCTGCTCAGTGCTTT
A_73_P069166|530688	0.0202769	0.000728474	up	1.55752	1.55752	0.639251	RPP25	ribonuclease P and MRP subunit p25 [Source:HGNC Symbol;Acc:HGNC:30361] [ENSBTAT00000028907]	TGTACTTAAGAACGTGCCCAGCCTCTCCATCCTACTTTCCAAGGATGCCCTGGATCCGCG
A_73_113992,A_73_P086686,A_73_P086691,A_73_118990|539548	0.0054128	2.64009e-05	up	1.55724	1.55724	0.638989	CNTFR	Bos taurus ciliary neurotrophic factor receptor (CNTFR), mRNA [NM_001278571]	CCCACCCCACAGTATTTAATGCCCTGTCAGTCCCTTCTAGTCTGACTCAATGGTAACTTG///AGTGTCCCTGTTACTCTGGCCCTGGCTGCCGCTGCTGCCACTGCCAGCCGTCTCCTGATC///GAGTCCTTTCCTCTCAAGTTCTTTCTGCGCTATCGACCCCTCATCCTGGACCAGTGGCAG///ACAGAAGCCTACGCTGGCAAGGAGTACATCATCCAGGTGGCGGCCAAGGACAACGAGATT
A_73_P286653,A_73_P296526,A_73_P089946,A_73_P386766,A_73_P388166,A_73_P105821|506402	0.011456	0.000218992	up	1.55716	1.55716	0.638921	CHD4	Bos taurus chromodomain helicase DNA binding protein 4 (CHD4), mRNA [NM_001206501]	ACTTCCTGGAACACGAAGGTTATAAATATGAACGTATTGATGGGGGAATCACTGGGAACA///CCCTGGCTTCTCCCCACTGTAACACTGTCTGTTACAACACGAACTGTTGTGGGTTCCCGC///TTGTTGGTTGATTTTGTGTTTTCTTTTCTCCTTTTTGGGGGGTATTCACAGTGGGCCGGG///ATTCAGCACCAACAATCCCTTCAAAGGCAGTTCTGGGGCTTCTGTGGCAGCAGCTGCAGC///AAGTTCAGAAGATCCTAATCTGGAAGTGGGGTCAGCCACCATCTCCCACGCCAGTGCCTC///TGGAGTCTGACTTCGACGACGCCAGTATCAATAGCTATTCTGTTTCTGATGGTTCTACCA
A_73_P035436|540228	0.0081466	0.000103441	up	1.55637	1.55637	0.638183	PRMT6	Bos taurus protein arginine methyltransferase 6 (PRMT6), mRNA [NM_001014962]	TCAGTCTCCCTTCCAGGAGATTCTTCTGGCGGTATTTATTAAAAAATGTTTTCAATCCCC
A_73_P080461	0.034024	0.0020718	up	1.5562	1.5562	0.638031		GB	AACAGAGCATTAGCTCTGCTGCTGCTTCGCCTTTGCCTTCTTTTCTCTGCAGCATTTATA
A_73_P031246,A_73_P487598|507021	0.015418	0.000408906	up	1.5555	1.5555	0.637381	SLC25A30	Bos taurus solute carrier family 25 member 30 (SLC25A30), mRNA [NM_001098895]	GTGTCTTTACATCATGATGTCGTATAGCCATAATTCCAAAATAAATAGTTCCTGTGTGTG///AATGATAGGCAACTTCATTAACATTTACCAGCAAGAGGGCACAAGAGGACTGTGGAAGGG
A_73_112931	0.00672404	6.07246e-05	up	1.55482	1.55482	0.636744		Rep: Phosphoethanolamine/phosphocholine phosphatase - Mus musculus (Mouse), partial (6%) [TC451380]	ACTGACAATGAGCGGGTGTTTTCCAGTTGCTGGCCTCCGATGCCTGTCTAGGGTCTTCGA
A_73_107658|535831	0.0353984	0.00224182	up	1.55462	1.55462	0.636558	ASB4	Bos taurus ankyrin repeat and SOCS box containing 4 (ASB4), mRNA [NM_001192864]	GTAATTCCTTTGCTTTCCCTCCCATTGTCATTGAAAAAGTACTTGCTTTTAGAGCCGGAG
A_73_P109456	0.00542407	2.95718e-05	up	1.5542	1.5542	0.63617		PREDICTED: Bos taurus Ras and Rab interactor 3 (RIN3), mRNA [XM_590476]	ATCTGACCACCACCTACGGGGCCCTGGAGCACATCAAGAACTACGACAAGATCACGGTGA
A_73_102258	0.03009	0.00162969	up	1.55414	1.55414	0.636116		LB01926.CR_N14 GC_BGC-19 Bos taurus cDNA clone IMAGE:8119216, mRNA sequence [DV833265]	TGTTTCCTTCCCTGGCCTCACCCTCTTGGTCTGTGTCTGACAGGAAATAAGAATAAAAGT
A_73_117737|516026	0.0152264	0.000399762	up	1.55377	1.55377	0.635777	GPRC5A	Bos taurus G protein-coupled receptor class C group 5 member A (GPRC5A), mRNA [NM_001034515]	ACACACGGGCAGGGGGTTGTTTCTTGTAAAATAAGTTATTCGCCATTCTTCCCTCCAGAT
A_73_114828	0.0206253	0.00075764	up	1.55188	1.55188	0.634017		Rep: Ectonucleoside triphosphate diphosphohydrolase 4 (EC 3.6.1.6) (NTPDase 4) (Uridine-diphosphatase) (UDPase) (Lysosomal apyrase-like protein of 70 kDa). - Canis familiaris, partial (45%) [TC406216]	TGCTTTTCCTTTTCCTTTTTGTTCCTTGAAACAAAACCAAACCCCACTGTTAGTAAACTC
A_73_P066536,A_73_P364506,A_73_118734,A_73_P358831,A_73_P315841|506146	0.019614	0.000684755	up	1.55156	1.55156	0.63372	UNC13D	Bos taurus unc-13 homolog D (C. elegans) (UNC13D), mRNA [NM_001192083]	AAGCACAATAACTACCTTCACCCACTGTTTGATGAGACCTTTGAATTCCTGGTGCCTGCT///ACAACGTGCTCAAGATCGACCTCTTCTCCATGGCTTTCCTGGAGTTGCAGTGGCTGGTGG///GACGGTTTGGCGTTGTCTGCTGAGGACCCCTCCTCCTTGGGACAGTGCCTACCACCTAGA///ACCCACTGTTTGATGAGACCTTTGAATTCCTGGTGCCTGCTGAGCCGTGCCAGAAGGACG///GGGGGGCGGTCTGGGTTCTCCCACCACAGGGCAGCCCTCCCGCCTGGCCTAACACCCCAA
A_73_111877,A_73_P406171,A_73_P407296|100124502	0.0218925	0.000866755	up	1.55019	1.55019	0.632445	KCTD7	Bos taurus potassium channel tetramerization domain containing 7 (KCTD7), mRNA [NM_001102545]	GGTTTGTGTATACCGTATAATGCTACCTGTGTTCCTTCATTTTCCTGTCTGTGAGCACTT///TTTGCCAAGCTCAAGGTCTGTGTCTTCAAGGAGGAGATGCCCATCACCCCCTACGAGTGC///TTTGGAGAGAAAAAGATCCAGCAGCTTCTCCTCCACTGTGTTTCCTTCTTGCTACAAGTG
A_73_116854	0.0120944	0.000253935	up	1.54971	1.54971	0.631995		casein beta [Source:HGNC Symbol;Acc:HGNC:2447] [ENSBTAT00000003409]	AATGCCCCCTCCTCACTTTTGAATTGACTGCGACTGGAAATATGGCAACTTTTCAATCCT
A_73_118290	0.00409472	9.3495e-06	up	1.54905	1.54905	0.63138		Rep: Nischarin - Homo sapiens (Human), partial (34%) [TC442569]	ACCATGCAGTGGCTCACTGTAGCCTCCCCTTCCTTTCCCAGTCCTTGTACTGGACATTTA
A_73_P166107	0.0308814	0.00171365	up	1.54885	1.54885	0.631198			TCTGGGCTGGTGGAGAACAAAGGACTGTTCTTTAGGACTGAAACTTGATTTTGCTTGTAG
A_73_108807	0.0147697	0.000377118	up	1.54819	1.54819	0.630583			CACCCCCTTTCCTCTCCTTTCTCTGAAAGTAATAGAAGTAAACTGGTTGTTTTGCTTTTG
A_73_116908,A_73_P298971,A_73_P361926,A_73_P314776|615685	0.0180169	0.000572591	up	1.54817	1.54817	0.630562	MTURN	Bos taurus maturin, neural progenitor differentiation regulator homolog (MTURN), mRNA [NM_001101246]	ATCTCATCCAACGATGTAATTACCATACGCTTGCTATTAAAGAGCCTTCCGATCTCTGGG///ATCAAGTGCTTTGAGGAATTCAATTGCAGTGAAGTCATAAAGTGATATGAAGGTGGGACT///GCCCAAGTGCAAATACACGGGCAGAAAAGGAGAATGACTTAATTTTGGATTAAGAGGGTA///GATAAGATACAGAGCAGTGCTTTGTATCTCCTCAGCGTTTTAGAGGCGAGAGTAAACCGT
A_73_120555,A_73_P357186|524771	0.0168986	0.000506772	up	1.54798	1.54798	0.630391	LOC524771	Bos taurus uncharacterized LOC524771 (LOC524771), mRNA [NM_001098057]	AAGGCCTGGATGGGGCTGGTGCTCAGCAACTGGCTGCTACATCTAAGCGTCCTGTTGTAT///TTGTTACTGTTTTCTCATCTAAAGTGGATGAGGCTACTTCTGCCTGAGGGAATGAGGGAT
A_73_114446,A_73_P419356,A_73_P062736|282157	0.0195579	0.000678933	up	1.54727	1.54727	0.629723	BTN1A1	Bos taurus butyrophilin, subfamily 1, member A1 (BTN1A1), mRNA [NM_174508]	TGATTGCACTTGTTTGTATTTGCATTTTCCTGTATATGTTTGTCTTATCCAGGCTCCCAC///CGTGCATCTGAAGGTGGCTGCTCTGGGCTCTGATCCTCACATCAGTATGAAAGTTCAAGA///TTCTTCTACAACATGACTGATGGATCCCATATCTATACTTTCTCCAAGGCCTCTTTCTCT
A_73_P402451	0.0209258	0.000790479	up	1.54721	1.54721	0.629665		coiled-coil domain containing 17 [Source:HGNC Symbol;Acc:HGNC:26574] [ENSBTAT00000011601]	TTTGTTGACCCCCCTCCTCCAGAAGATGCCTGAACTAGCAGACTCGGGTGCAGAGAAGAG
A_73_P058731,A_73_P399576,A_73_P329891,A_73_105856,A_73_110551|617865	0.00994426	0.000169279	up	1.5466	1.5466	0.629099	SLC12A9	Bos taurus solute carrier family 12 member 9 (SLC12A9), mRNA [NM_001206286]	TCTATGATGATGCTGCACCCCAGGATCACTTCCTGACTGACCCGGCTTTCTCTGAGCCTG///TATACTTTCTTCATCTACATCCTGCTTTTCTTCCTCTCCAGCTTCACGTGTGACAGGGTG///ATGTTCAGTATAGTGGTTTTCTTGAGGATTGGGTTTGTGGTGGGTCATGCTGGTCTGCTT///CCCGTTGGCCCCTCGGCCTGGCCCCAATGGCTCCTCCCTGCCGCCCCAGGTCGGCCACTT///GAGGTTGTGATGTTTTTGTTCTGTTTTATTTTTCTAACTGCTCAACGTGAATAAAAGATC
A_73_P056661,A_73_118091|513254	0.0419139	0.00306189	up	1.54573	1.54573	0.628286	PEBP4	Bos taurus phosphatidylethanolamine binding protein 4 (PEBP4), mRNA [NM_001034440]	TCCTGAATGCAACAATTACAGACAGAAGATCACTACCTGGCCCGAACCAATCGTGAAGTT///ACCCATGGTCTGGGTATGGACTCCCCCTCTCTGGGTATGGAACCCCCTTTCTCTTCCAAA
A_73_P032391|786914	0.0125431	0.000272231	up	1.54549	1.54549	0.628068	LOC786914	Bos taurus RIKEN cDNA 1700001K19-like (LOC786914), mRNA [NM_001099201]	GCCCCACCTCCCCGGCCTGAGTCACAGAGAATTCCCTTAAGTAAATATGTATGTATTTTT
A_73_P488058	0.0438973	0.00333207	up	1.54184	1.54184	0.624653			ATTGGAGAGGGAGTCCTAAGCAGTCAACTGCATTTGTAATAAAGCCCCCTCGTTCTCAAA
A_73_120696	0.0254621	0.0011807	up	1.54179	1.54179	0.624609		LB0058.CR_E14 GC_BGC-05 Bos taurus cDNA clone IMAGE:8010328, mRNA sequence [DT853423]	CCCGCCATGTATTGTCGTCTCACCCTCCGTGGCCAGTCCTTGTGAAGGCACCAGCTCAGA
A_73_P494402	0.017092	0.000517797	up	1.54059	1.54059	0.623484			CCATACGTTACATACGGGGTACCCAAATTGAAGTCTGTAAATGAATTGATCTACAGGCGT
A_73_113424|521207	0.00558454	3.41348e-05	up	1.54026	1.54026	0.623175	LOC521207	zinc finger protein 365 [Source:HGNC Symbol;Acc:HGNC:18194] [ENSBTAT00000014000]	AGAACTCTGCAGACCAGCAAAGAAAGGGGAGCCTCTGGGGTTTGGCCGGAAAGGCAACAT
A_73_P084926|787932	0.0470115	0.00380491	up	1.5399	1.5399	0.622841	LOC787932	GB	TAAGTTTGTGTCAGCATTTTATACCATCTTCACCCCTGTGCTAAACCCCCTCATCTATAG
A_73_P117376	0.0118087	0.000232187	up	1.53968	1.53968	0.622634		fbn-l079 Cattle pUC18 Library Bos taurus cDNA, mRNA sequence [BE217533]	CTGCTCTTCTCCTTAATAGGGTCTGTGTTTTCCATCTATTAAATGGTTCCACTTCCCAGG
A_73_103427|531092	0.0256217	0.00120852	up	1.5392	1.5392	0.622179	MMP25	matrix metallopeptidase 25 [Source:HGNC Symbol;Acc:HGNC:14246] [ENSBTAT00000021843]	TGCGGGGCGGCCTTCGGTGCTCCTCCTGCCTCTTCTGTCCCTGCTGGTGGGGGGCCTGGC
A_73_110355,A_73_P427021,A_73_P112056,A_73_P047046|286842	0.010916	0.000200909	up	1.53909	1.53909	0.622081	BASP1	Bos taurus brain abundant membrane attached signal protein 1 (BASP1), mRNA [NM_174780]	AAAGTCTGCGTTCATTGCAGTTCCAGTTTTCTCTTCCATTCTGTGTCACAGACACCAACA///ATTTCTCATGACGAGTTAATGCATGTCCGTGGTTGGGTGCACCTGTAGTTCTGTTTATTG///GTCAAACCTGCCGAGACCCCGGCAGCTAATTCCGATCAAACCGTAGCAGTGAAAGAGTAA///TAATGCATGTCCGTGGTTGGGTGCACCTGTAGTTCTGTTTATTGGTCAGTGGAAATGAAA
A_73_114323	0.0265855	0.00130726	up	1.53878	1.53878	0.621783		Rep: Predicted protein - Physcomitrella patens subsp. patens, partial (12%) [TC484181]	GTAAGATAGTCTCTGTCCCCACCCCTTTGTACTTGATGTCCCCAGCTATCTTTCATGGCC
A_73_P205702,A_73_P114156,A_73_P167782,A_73_100662|513264	0.0198362	0.000699527	up	1.53876	1.53876	0.621768	LPXN	Bos taurus leupaxin (LPXN), mRNA [NM_001025082]	TGCTTTGTGTGCGGGGAGTGCTTCAGCGGTTTTTCTACCGGCTCCTTCTTTGAGCTGGAC///ATGTCTACAGTGAGATTCAAGAGCCAAAGGAATCACCACCAGCTTCTAAAACCTCAGCAG///GATTTTAACTGGAAAACTTCGACTCCTGACATCACTGATAAATAAAGGAACTTGTGGTTT///TTCCCGGTGTAACCTCAGCTGAGCCCACACGCGCCCTCTTCCGATCTGCTGGAAAATTTA
A_73_119793|511853	0.00659773	5.73213e-05	up	1.53777	1.53777	0.620839	TTLL4	Bos taurus tubulin tyrosine ligase like 4 (TTLL4), mRNA [NM_001205708]	TTGGGAGGGGGAGAAGGTGAGACAGGTTCACTGGCTGGCACCTCATATCTCAGCAGAGAA
A_73_P095296|618218	0.0405694	0.00288013	up	1.53773	1.53773	0.620798	NKAIN1	sodium/potassium transporting ATPase interacting 1 [Source:HGNC Symbol;Acc:HGNC:25743] [ENSBTAT00000026850]	AGAAGACGTCGCATTTACAACTGCAGCCTCTGTACACGTCTGGGTAGCGATTGCCCCACG
A_73_115027	0.0249175	0.00111945	up	1.5376	1.5376	0.620678		Rep: Flagellar motor switch protein - Bacillus pumilus (strain SAFR-032), partial (6%) [TC465166]	CTCCCCCTTCCTCTGATCCCTTGGAATTGTTCCCATAAATTCACAGGTGCAAAATAAAAA
A_73_P152776,A_73_P065296|504803	0.0128089	0.000285043	up	1.53702	1.53702	0.620135	ALOX12B	Bos taurus arachidonate 12-lipoxygenase, 12R type (ALOX12B), mRNA [NM_001192038]	CTCCCCATCCCCTACTACTACCTGGACCCCGTGCTGATTGAGAACAGCATTTCTATTTAG///TTTCTTGACACATTGCCGGATATTAAGACCACATGCATCACCCTACTGGTGCTTTGGACA
A_73_P132821,A_73_P323656,A_73_P453111,A_73_119243,A_73_P226377,A_73_P397056,A_73_P343551,A_73_P430506,A_73_P442391,A_73_115509,A_73_P258191|338325	0.0451503	0.00349156	up	1.53623	1.53623	0.619395	XIST	Bos taurus X (inactive)-specific transcript (XIST), non-coding RNA [NR_001464]	GTTGGCTTGACATTTCACCTTTTCTGATACTGGCTACCCTTCTGCTGTTTCTACTCTTTA///CTCAGTTGGTATGCCTAATACTAGGCTTGCAAAATTGTATCATAGCTATTATACCATGAA///GAGAATTATTGTTCATAATTTCAATTTTCTGTGGTCCCCTGCCTCCACAGCCCCTAGCTC///GACTCTTAAACCCCAGCTGTTTCTATTGCTCTTTTCCCTACTCTTGGACATTTTCAGTTC///GAAAGATTCACTACCACTGAGCAACAACTCTAGGCCAGGAGGTTATACCAAGATTCTTTC///TGAATTTGCATTACCACAGAGGGTTCAGGGACTGTTAATGTGCTTAAAGGCTGCTGCAGT///TTTTCCTCCCTGGTCTTGTTA…
A_73_P179912	0.048728	0.00408125	up	1.53604	1.53604	0.61922		Rep: Uncharacterized protein At2g40935.2 - Arabidopsis thaliana (Mouse-ear cress), partial (7%) [TC423987]	ATGCTCCCCTATGGACTGGCTGTGGCAATGTAATGCCTGTATAATGTTTTCAAATAAAAA
A_73_P293041	0.00441801	1.32385e-05	up	1.53554	1.53554	0.61875		Rep: MAP kinase-activated protein kinase 2 - Homo sapiens (Human), partial (60%) [TC421138]	CCCTCGACACTGTGCTCATTTGGCAATTTTATCAGTAATTTGACTTAGAATTTTTACGAA
A_73_P079061,A_73_P371666|516291	0.0213491	0.000825377	up	1.53541	1.53541	0.618628	REC8	Bos taurus REC8 meiotic recombination protein (REC8), mRNA [NM_001191288]	TCTCTGTCCTTCCTGCTCCTAGAGCTACCGTTCAAGAAGAAAATAAATGCCTTTATTACA///TTGTACCCTGAAGAATTTGGATTGACATCTGAACGGAAGTGGTGTAGACGAGGGTGAAAC
A_73_P349176,A_73_P106921,A_73_105067,A_73_P426526,A_73_P107221|517952	0.0369073	0.00242036	up	1.53514	1.53514	0.618366	HAND1	Bos taurus heart and neural crest derivatives expressed 1 (HAND1), mRNA [NM_001075761]	TGCGTGTCATCTTCAACCTTATCCCAGAATCTCTCAAAGCCGGTGCCTACCAGAGCGCCG///AGAGGATTAAAGGGCGCACAGGCTGGCCGCAGCAAGTCTGGGCGCTGGAGCTAAACCAGT///ACTCACCGTCCCCTCCTTTTGCCAAAGCAGTATCTATGCTCTTGACTAATAAAACATTTT///AAGACTCTGCGCCTGGCCACCAGCTACATCGCCTACCTGATGGACGTGTTGGCCAAGGAC///AGCAGCACGAAGGCTTTCCTCCTGCCCTGGGCCCAGGCGAGAAGAGGATTAAAGGACGCA
A_73_P092121	0.0373347	0.00247687	up	1.53437	1.53437	0.617646		Rep: PREDICTED: spectrin, alpha, erythrocytic 1 (elliptocytosis 2) isoform 3 - Pan troglodytes, partial (7%) [TC440071]	CACAGTAACTAAGTTTATTCTCAGCTTTTTCCCCTTAGACACTTGAAAAATTTTCAGGCT
A_73_P464446,A_73_117930|614212	0.0285675	0.00148373	up	1.53387	1.53387	0.617173	LMO4	Bos taurus LIM domain only 4 (LMO4), mRNA [NM_001034751]	TCGGCACGTCCTGTTACACCAAGAGCGGCATGATCCTTTGCAGAAACGACTACATTAGGT///TCAGGCTCATAGCAGCTACTGTGTAGAAATTCCCCCCTACTTCTAATTTGCTGAATGAAG
A_73_119145	0.0158871	0.000444086	up	1.53346	1.53346	0.616791		1371604 MARC 7BOV Bos taurus cDNA 5', mRNA sequence [DN535567]	TGCCCACTCAGTTCAGCCTTGGAGAGTCTTTCTGTAAAACTGTTTTTTAAAATCACTCAC
A_73_P401211,A_73_112409,A_73_114983|280968	0.0354706	0.00225721	up	1.53286	1.53286	0.616221	TPPP	Bos taurus tubulin polymerization promoting protein (TPPP), mRNA [NM_173976]	TTTGAGCAGTTCAAGGAGGCGCTGGAGGAGCTCGCCAAGAAGAGATTCAAAGACAAGAGC///CATGCCCATGGACCAAGGCTGTGCTAAGGGTGGGCACTGAGCTGAGGGCTGCTGTGCAAA///CATACCTCCTCGTGTGCTCCCTGTTGTTAACATTGTGTCCGGTTGGTAAAGTGACAAATA
A_73_P491508	0.0161692	0.000467026	up	1.53084	1.53084	0.614326		LB00461.CR_D12 GC_BGC-04 Bos taurus cDNA clone IMAGE:8050622, mRNA sequence [DT841774]	GGTGACTCCAGCCCTGTTCTCACTCCTCCCCAGCCTTCAGAGAATAAAGTTTCTAACGTG
A_73_P072511	0.0395612	0.00276365	up	1.53055	1.53055	0.614052			GCTCTTCAGTCAGGTACGAGTTTGTATGTATGTATGTTGCAAGTATATATTGAACATCCG
A_73_109650	0.0386568	0.0026382	up	1.52947	1.52947	0.613031		Rep: G-protein-signaling modulator 3 - Homo sapiens (Human), complete [TC403122]	CCACCCTCCCTCCCCACTGCTGTTCTGAACTGTCTGATGTTTGGTTATATGAATAAATGT
A_73_P379991,A_73_100253|618258	0.00595087	4.48507e-05	up	1.52862	1.52862	0.612234	DPEP3	dipeptidase 3 [Source:HGNC Symbol;Acc:HGNC:23029] [ENSBTAT00000023962]	TTTCAGACTCGGCCAGACCAACCTAGACAAGCTCAGGGATGGCTTCGTGGGTGCACAGTT///AGAGGCCCCCAAAAGCCTCCCTACAACTCGTTTTAGGCCTTGTGGCTGCTGTCACCTTCT
A_73_103225	0.0433049	0.00325905	up	1.52776	1.52776	0.611415		Rep: Protein-O-mannosyltransferase 1 - Bos taurus (Bovine), partial (33%) [TC429009]	CTCCGCCAGCCTTGCCACCCTGGTGTACGCCCTGCTGTTCATCTGGTACCTGCCTTTTTT
A_73_P114181,A_73_103800|613627	0.0133948	0.000306759	up	1.52767	1.52767	0.611334	SERP2	Bos taurus stress associated endoplasmic reticulum protein family member 2 (SERP2), mRNA [NM_001113721]	GAAAAAACAAACAAACAATCAAAGGCTCCCTCAGCTGTTCCCTGATCACTTCATCGTGGA///CCCCATGATCACTGCTTTACTTTCTATGGAGACAGTCTCTGCTCCATTGGGAATTGCTTT
A_73_P097771	0.0323911	0.00189708	up	1.52473	1.52473	0.608556			GATGTAAGTGCAACATTGTAAATCAGCTATGTCTGTGTGCTCAGTCCTGTCCAGCTCTTT
A_73_P031776|615788	0.0332077	0.00199047	up	1.52385	1.52385	0.607716	CRADD	Bos taurus CASP2 and RIPK1 domain containing adaptor with death domain (CRADD), mRNA [NM_001083773]	GAAGATGTGATAGGAAACACTTGTTCATGCTTGACACCTCCCTGTCTTCTCCTTTCTGCA
A_73_120920,A_73_P274231,A_73_P048021,A_73_P328821|508325	0.0102601	0.000182191	up	1.5221	1.5221	0.606067	SRPK3	Bos taurus SRSF protein kinase 3 (SRPK3), mRNA [NM_001083390]	AGTCAGTACCGCCCCCCAGGAGGTCTTGACGGGGAAGCTGTCGAAAAACAAGAGGAAGAA///TCTGCCCCCCAACCCTCACAGAGGGGCCCTCTGAATGGAAGTGTGCTGTTTGCTTTTCTT///TCACAGAGGGGCCCTCTGAATGGGAAGTGTGCTGTTTCTTTTCTTAATAAAGTGTGACCT///TCATCCACACGGACATCAAGCCCGAGAACATTCTGCTGTGTGTGGGGGATGCCTACATCC
A_73_114664|521761	0.0152105	0.000398766	up	1.52198	1.52198	0.605949	ADARB1	adenosine deaminase, RNA specific B1 [Source:HGNC Symbol;Acc:HGNC:226] [ENSBTAT00000023240]	CCATGAGTCCAAGCTGGTCGCCAAGGAGTACCAGGCTGCCAAGGCCTGTCTGTTCAGAGC
A_73_P306256,A_73_P048421|534323	0.0238748	0.00101794	up	1.52195	1.52195	0.605925	SERPINB5	Bos taurus serpin family B member 5 (SERPINB5), mRNA [NM_001098080]	ATGGTGTCAACTGTAAGATCATAGAGCTTCCCTTTCAGAACAAGCACCTGAGCATGCTCA///AGATTAGCAAGAGAGTCCAATGGTTCCCTCCCCCATTAGAAATAAAGTTGGTGATCAGTT
A_73_P439101,A_73_112781|614671	0.049881	0.00428319	up	1.52194	1.52194	0.605907	C1QTNF5	Bos taurus C1q and TNF related 5 (C1QTNF5), mRNA [NM_001099138]	TGGAGAGAAGCGCAGGGAAGACAGCGCTGGGGTCACCTGGAGGGTCTGAATTAGCCAGAG///TCTGGGTCTTCCCTCATCGCTCCTGCTCCTGGGCCCTTTTTCTCAGAGATCATTCAATAA
A_73_119636|519929	0.0382658	0.00260277	up	1.52184	1.52184	0.605818	RIMS3	Bos taurus regulating synaptic membrane exocytosis 3 (RIMS3), mRNA [NM_001205867]	TGGTACAAACTCTTTCCCACGTCCTCCGTGGCAGACTCTACGCTCGGCTCCCTCACCAGG
A_73_P282676,A_73_P502973,A_73_115286|506932	0.00594864	4.24361e-05	up	1.5215	1.5215	0.605494	CHST1	Bos taurus carbohydrate sulfotransferase 1 (CHST1), mRNA [NM_001083648]	TGGACCTTGTTTATTTCTTCCAGTCTGTGGCAACGCTGTCTGTCTGTCTGTCTGAGTTTT///TTTGACCTCACATGCTGGAGAAGCAGCCCCATGAAGGTGCCCAGCCATGCAATGTTCCTG///TGGTTTTCTGATTGATCTTGGGGTCCATCTGTGATATCTCTTTGTGCCAAAAAAGAAAAA
A_73_P054146|523753	0.040963	0.00293919	up	1.52087	1.52087	0.604901	LOC523753	GB	GATACCACTTTCCTTCATCCTGGTCTCTTATGTTCGCATCTTTGTCTCCATCTTAAGCAT
A_73_106260|533907	0.0311978	0.00175824	up	1.51992	1.51992	0.603998	SLC41A1	Bos taurus solute carrier family 41 member 1 (SLC41A1), mRNA [NM_001206036]	AGACACAGATGTCGGGGACTAGCCCGGTCACTCAACCTTCTGTCCACCTCTCTGCACTTT
A_73_P081966,A_73_108489|539022	0.0451724	0.00349598	up	1.51965	1.51965	0.603737	ZNF2	Bos taurus zinc finger protein 2 (ZNF2), mRNA [NM_001046446]	GTGTGTGGCAAAGTCTTCAGTTCTAAATCATCAGTTATTCAGCATCAACGGCGTTACGCC///TGTTTGAAGAAACACTGTCCACCCACTGTGTTACAGAGCTGATGTGGGATGCCAGAAATT
A_73_P166082	0.0208853	0.000783877	up	1.51922	1.51922	0.603327		Rep: PREDICTED: chromodomain helicase DNA binding protein 7 - Pan troglodytes, partial (94%) [TC403367]	GTCCTACTGTTTACACTCACAGTTAATGTTCATACCTAGTTTTATAAGCTGTTCTGTAAC
A_73_117804|100295800	0.00969218	0.00016203	up	1.51884	1.51884	0.602966	COX17	Bos taurus COX17 cytochrome c oxidase assembly homolog (S. cerevisiae) (COX17), mRNA [NM_001207032]	TGCTCTGGGAGTGAATAGTTCCTGAAAAATGAAGAAGATTCAGTAACTTTGGGAGTTCCT
A_73_P043421|785815	0.00542407	3.10967e-05	up	1.51839	1.51839	0.602541	HR	Bos taurus HR, lysine demethylase and nuclear receptor corepressor (HR), mRNA [NM_001102535]	ATCCTTGCTCCCTCCTCTACCTCCTTCCTTCTGGATTTCCATTAAAGGCTGTTGTTTTGT
A_73_P095676|100848477	0.0290754	0.00152376	up	1.51759	1.51759	0.601778	FBXO42	F-box protein 42 [Source:HGNC Symbol;Acc:HGNC:29249] [ENSBTAT00000011217]	CAGAATGTGAAGTACTATCCAAAAACAAACGCCTTGTACTTTGTGCGAGCAAAGAGATAA
A_73_P349981,A_73_104512|505320	0.0340426	0.00207781	up	1.51753	1.51753	0.601728	ARIH2	Bos taurus ariadne RBR E3 ubiquitin protein ligase 2 (ARIH2), mRNA [NM_001206242]	AAGAAGTACTTGTTCTACTTTGAGAGGTGGGAAAACCACAACAAGAGCTTGCAGCTGGAG///TTTTTCTGAATGACTATTAATAGTATTAGATCATTACAACTTATGTAATTTTCAAAGGTT
A_73_P489128	0.0412123	0.00297121	up	1.51713	1.51713	0.601344		112939 MARC 1BOV Bos taurus cDNA 5', mRNA sequence [AW669530]	AAATAATCCTTCGGGGATCGTGGGGCTGTGGGGCCTCCAAAGGTCAGCTTGGCACTGTTA
A_73_P065866|281222	0.00481236	1.55044e-05	up	1.51691	1.51691	0.601138	HCRT	Bos taurus hypocretin neuropeptide precursor (HCRT), mRNA [NM_001166520]	TTCCTCTACAAAGGTCTCCTGGGCCACCGTGACGCTGCTGCTCCTGCTACTGTTGCTGCC
A_73_115892,A_73_P103821|281170	0.0165387	0.000483694	up	1.51687	1.51687	0.601099	FRZB	Bos taurus frizzled-related protein (FRZB), mRNA [NM_174059]	AACTGAACGACAGGCCTGTGCACTGGCCTGCACTTTATCATTTGGATTTGTGCTGTTTAA///CTCCTTCCCCCATTCCCTTTTTTGTGGTCTGAGTACAGATCCTTAAATATATTATATGTA
A_73_P038086,A_73_100548,A_73_P254587,A_73_P110891|281004	0.00409472	6.58574e-06	up	1.51534	1.51534	0.599641	APOE	Bos taurus apolipoprotein E (APOE), mRNA [NM_173991]///Rep: Apolipoprotein E - Bos taurus (Bovine), partial (24%) [TC484575]///Rep: Apolipoprotein E - Bos taurus (Bovine), partial (68%) [TC426278]	CTGCCGCTGCCCCAGCTGTCCTCCTGGTGGGCCCTAGCTTAATAAAGATTTCTCAAGCTT///AGCTGTCCTCCTGGTGGGCCCTAGCTTAATAAAGATTTCTCAAGCTTCATGGCGAAAAAA///CAACACCCAGGTCATTCAGGAACTGACGGCGCTGATGGAGGAGACCATGAAGGAGGTGAA///CAGCTGTCCTCCTGGTGGGCCCTAGCTTAATAAAGATTTCTCAAGTTTCATGGCAAAAAA
A_73_111337,A_73_P160887,A_73_P335151|510458	0.00755435	8.29736e-05	up	1.5153	1.5153	0.599606	SUSD2	Bos taurus sushi domain containing 2 (SUSD2), mRNA [NM_001205675]	GTCTTACGGAACGTCTCCTGACAGACTCCTTGCCTGTGGAGGCAGAAAACAAGCTTTGGT///TGTAACTCCAAGTCTTACGGAACGTCTCCTGACAGACTCCTTGCCTGTGGAGGCAGAAAA///TTCCTGGTGGAAAACTTCAAGGAACGGCCTAAGCATGACCCCACTTTCCTGCCCCTCTTC
A_73_P393906,A_73_P132921,A_73_P095426|617552	0.0357732	0.00228841	up	1.51492	1.51492	0.599244	CNKSR1	Bos taurus connector enhancer of kinase suppressor of Ras 1 (CNKSR1), mRNA [NM_001193165]	TACATGACGCCCGTTCCCTCCTCTTCTGGCTCAACAGGTACCTCTTCTCCCACTTAAATG///TGAATTCTGACCCCAAGGAACAGTCTTCCCACCCGCCACCCTCTGACCCCGAGGAGTGCT///GAAAAAATATGTGTTCCAGCTCACCCACAACGTGTACAAACCCTTCATCTTCGCTGCTGA
A_73_118281|512876	0.0314658	0.00179853	up	1.51394	1.51394	0.598308	GPR4	Bos taurus G protein-coupled receptor 4 (GPR4), mRNA [NM_001075583]	ATGAACCTCTACCGAGTCTTCGTGGGTTTCCTCTTCCCCTGGGCGCTCATGCTGCTATCA
A_73_104545	0.0079507	9.54338e-05	up	1.51366	1.51366	0.598044		Rep: PREDICTED: A-kinase anchor protein 11 isoform 4 - Pan troglodytes, partial (7%) [TC438620]	GGTGGGTACCCTCTTTTATTTTACTCTTTTCTGGTTACAAACCCGCTGTTAACATTAAAA
A_73_117286|540687	0.0358968	0.00231306	up	1.51217	1.51217	0.596621	GPR3	PREDICTED: Bos taurus G protein-coupled receptor 3 (GPR3), mRNA [XM_005197588]	CTGGTGACCCTCCAGCCCTGATCACTACAGAATTCCAGAGTGTTAGGTCCTCCAGGGCTT
A_73_112741,A_73_P323621|507116	0.0361048	0.00233609	up	1.5121	1.5121	0.596551	ZCCHC3	Bos taurus zinc finger CCHC-type containing 3 (ZCCHC3), mRNA [NM_001080234]	GGCATTGGGTCTACTAAGTGTTACCAAGTTAAAGTAGAAAAGACAGTACACTGCTTTTCT///CCGAGAACTGTAGTGTGCAGATATGTTGCCCTGCCCTTTTTAAAATTTTATTTTCATTTT
A_73_111982,A_73_P161572|521379	0.0228972	0.000951034	up	1.51143	1.51143	0.595915	PFN3	Bos taurus profilin 3 (PFN3), mRNA [NM_001077945]///LB01447.C21_K09 GC_BGC-14 Bos taurus cDNA clone IMAGE:8557763 3', mRNA sequence [EV699510]	ATGGGCCGGCGGGGTGTGCATGGGGGCATTCTCAACAAGACGATGCACGAGCTGATCCAT///TATGAAGTTGAGGTAACCGTGACGTCACATAGGGGTTGCCTACGCTGGCATGCGTCGGTG
A_73_P101131,A_73_115598|286799	0.0438873	0.00332963	up	1.51086	1.51086	0.595367	VEGFD	Bos taurus vascular endothelial growth factor D (VEGFD), mRNA [NM_001101043]	AAGTTTGATGAAGATCGTTGTGAGTGTGTCTGTAAAACGCCATGTCCCAGAGACCTCATC///CAGGATCGAGAAAATCCTTGAGTTAGCCTTGATCCCCAGTTCCCCATCCATGTCATTTAA
A_73_102363,A_73_P074816|539813	0.0490149	0.00414824	up	1.50989	1.50989	0.594442	KCNG1	Bos taurus potassium voltage-gated channel modifier subfamily G member 1 (KCNG1), mRNA [NM_001205719]	CTCTGAGGCTTGACGCTATCACCATCGCTGCAGAAGCCTCCAAAGGCACATGCTGCTTCT///AGGTGTTCGCCTTCCTGTCGGTGCTCTTTGTCACGGTCACAGCTGTCAACCTCTCCATCA
A_73_108439	0.00508753	2.10212e-05	up	1.50938	1.50938	0.59396		lectin, mannose binding 1 like [Source:HGNC Symbol;Acc:HGNC:6632] [ENSBTAT00000028561]	TAGAGGGTTTGGCTGGTGTCTTCTGCCTCTGGGTACCTAGCTCCTACCCACACCTTAGCT
A_73_P464372	0.0225298	0.000924672	up	1.50887	1.50887	0.593473		Rep: DNA-directed RNA polymerase I subunit RPA12 - Bos taurus (Bovine), complete [TC429571]	GGATACTGAGCTTCAACAGAAAACTCTGGATCAGATTAATTTGATATGTAAGTTTGGACA
A_73_P303471,A_73_P119391|506408	0.00547052	3.28695e-05	up	1.50804	1.50804	0.592679	LOC506408	zinc finger protein 786 [Source:HGNC Symbol;Acc:HGNC:21806] [ENSBTAT00000019646]///PREDICTED: Bos taurus zinc finger protein 786 (ZNF786), mRNA [XM_582851]	AAGAAGCTCATTACTATTTCCAAGTAGATCCTCTTCAGAGCCACCGTTCCTGTAAACCCT///AAGCATGGGGTGACTGTTAAATGTCAGCTCTTCTCTTCATAGTATGAACATAAGCAGGGG
A_73_P064676,A_73_P040666|522040	0.0441109	0.00336173	up	1.50797	1.50797	0.592605	SMG8	Bos taurus SMG8, nonsense mediated mRNA decay factor (SMG8), mRNA [NM_001080286]	AACGTGCAATTGATGAGTTACAAGGTGCTCCGTGGGGTTCTTAAAGCGGTAACACAATAA///GGTTACAGAAGTTCAGTATTTGGACAGTAATTGTTCCACTGTTTCTTGATATTGTTGGTA
A_73_P131446	0.0142243	0.000351517	up	1.5066	1.5066	0.591297		965440 MARC 3BOV Bos taurus cDNA 3', mRNA sequence [CK778283]	ATAGACTTTCTCATCTTCTTGCTCTCCTAAGGAATATGTTACTCCAAAAATCTTCTGTGC
A_73_P095541	0.00969218	0.000160362	up	1.50523	1.50523	0.589982		low density lipoprotein receptor class A domain containing 2 [Source:HGNC Symbol;Acc:HGNC:32071] [ENSBTAT00000002337]	AATACAGATGACAGTACCTCCCAAACCCTGACTCCCTCTGCAGCTCTCCCGTCTTCAGGC
A_73_113345	0.00506393	2.00567e-05	up	1.50477	1.50477	0.589547		4126669 BARC 8BOV Bos taurus cDNA clone 8BOV_43J23 5', mRNA sequence [CN791870]	TGTGTGTGCCCCTCCCTCCCTACTAATTTTAAAGGCGGAGAGAAGAAACAAATACGTTGA
A_73_P092236,A_73_P101331|353111	0.0252609	0.00115675	up	1.50342	1.50342	0.588247	NTRK1	neurotrophic receptor tyrosine kinase 1 [Source:HGNC Symbol;Acc:HGNC:8031] [ENSBTAT00000003980]	ATTGAGAACCCACAGTACTTCAGTGATGCCTGTGTTCATCACATCAAACGCCGAGATATC///TCTCAATGGCTGTGGGCCTGGCCGTTTTTGCCTGCCTCTTCCTTTCTACAACATTTCTTG
A_73_116723	0.0343135	0.00210774	up	1.50332	1.50332	0.58815		Rep: sorbin and SH3 domain containing 2 isoform 2 - Homo sapiens, partial (8%) [TC425024]	CGTGATTCTCAGTCACCAGACTCAGCAAAAGGTTTTAGAAGCGTTCGACCAAATCCACAA
A_73_105720	0.0119913	0.000246563	up	1.50264	1.50264	0.587498		PREDICTED: Bos taurus histamine receptor H3 (HRH3), mRNA [XM_867027]	CCGCACACCTGCCGTGCTGCCCCTGCAGACCCTGAAGTCCACACAGTAAAGTGTATTTTT
A_73_115056|504851	0.013432	0.000309145	up	1.50263	1.50263	0.587494	BOK	Bos taurus BOK, BCL2 family apoptosis regulator (BOK), mRNA [NM_001098868]	GTGGCTCCTGATCTACTTCTGGGGGAATGTGTGCCCCCATGCGTGTGTCGGGTTCCCCAT
A_73_120489	0.00652516	5.51989e-05	up	1.50191	1.50191	0.586796		BovGen_24749 normal cattle brain Bos taurus cDNA clone RZPDp1056C0960Q 5', mRNA sequence [CO896424]	GTCCTCCTTGTGTAAGACAGTAACTTTACACTTCAGACAGATTTTCTGTGTTATGAAATG
A_73_111185	0.0276326	0.00140198	up	1.50156	1.50156	0.586462		Rep: Atrophin 1 - Homo sapiens (Human), complete [TC393036]	AATGCACCAAAAAAGACCAAAACTGAGGAGATGCCCCGGCCCCAGTCTCCCTCCGATCTG
A_73_P313431,A_73_100327|520302	0.0264217	0.0012867	up	1.50108	1.50108	0.586001	VRK3	Bos taurus vaccinia related kinase 3 (VRK3), mRNA [NM_001046251]	AGACGAACACCAGTTCTGAAACATCTTCCAAGAAAGTGAAATGGTGCAGCTATGCTGCCT///AGTGGGGACACTGCCATTGGCACCACTGCGCTTTGACAATAAATTGTTTCATTGGAACTT
A_73_113188	0.0281288	0.0014438	up	1.50107	1.50107	0.585989		Rep: Predicted protein - Physcomitrella patens subsp. patens, partial (12%) [TC423328]	TGTGTGCTCATCCCATCATTTGAAACCCTTCGTATAAAACATTGTAGTATCATTTGGAAA
A_73_104812	0.0386664	0.00264577	up	1.50064	1.50064	0.585577		paired box 1 [Source:HGNC Symbol;Acc:HGNC:8615] [ENSBTAT00000008861]	TCAGCATCCCCCGTTCATGGCCCTCGGCTCATTCGGTCAGCAACATCTTGGGCATCCGGA
A_73_112128|613425	0.0119913	0.000246067	up	1.50049	1.50049	0.585431	UROS	Bos taurus uroporphyrinogen III synthase (UROS), mRNA [NM_001191369]	TGGGCTGCCCAGGTGAATAAAGTTTGCTGCCTGTGAAGGAGTTTTATCCTCTTGTGAAAA
A_73_P278866,A_73_107103|520625	0.016808	0.000502132	down	1.50078	-1.50078	-0.585716	SLC44A4	Bos taurus solute carrier family 44 member 4 (SLC44A4), mRNA [NM_001083442]	TCTCTTCAACTTGCAAATCTATGCAGTTCTGGGGCTATTCTGGACCATCAACTGGGTACT///CCGCCTGTACAGCCTCCCCGCCTTCCAGATCACGCTTTTGTAGTAAAAAGATTTTATTAA
A_73_P046271|508903	0.0331478	0.0019817	down	1.50119	-1.50119	-0.58611	TMEM106B	Bos taurus transmembrane protein 106B (TMEM106B), mRNA [NM_001034337]	ATCCCACTCATTTGCATGGTTTTGTCAGTGTTATTTCAAGCTAGTGTTTGCATAACACTT
A_73_P057291|514267	0.0419672	0.00306882	down	1.50152	-1.50152	-0.586424	WDR36	WD repeat domain 36 [Source:HGNC Symbol;Acc:HGNC:30696] [ENSBTAT00000007218]	CAGTTGGAAGAAAACTGGATCCATTTACAGTTACTCTTTAATCAAAGCCTGTGTGTTTTA
A_73_P097366|507193	0.0319215	0.00184817	down	1.5038	-1.5038	-0.588617	ADD1	Bos taurus adducin 1 (ADD1), mRNA [NM_001205999]	ATTGAACACTAACCCAAAAGAGGTCCAGGAGATGAGGAACAAGATTCGAGAGCAGAACCT
A_73_P318686,A_73_P079106,A_73_105078|614181	0.0396068	0.0027736	down	1.50533	-1.50533	-0.590084	HOMEZ	homeobox and leucine zipper encoding [Source:HGNC Symbol;Acc:HGNC:20164] [ENSBTAT00000046413]	TCTGAAGGGCACAAATCAGAAAGCACCATGCCTCCTAATAAAGAGGCCAGCAGTCTTAAT///AAGAAATTGAAGAGACTCGAGCCCGAGTAGTCTACCATCGGGACCAACTCCATTTCAAAT///ACGGCGAGAGGATTACCATAAATTAGAGCAGATCACTGGTTTACCTCGGCCTGAGATTAT
A_73_P038001|281499	0.0360885	0.00233091	down	1.50623	-1.50623	-0.590938	SPP1	Bos taurus secreted phosphoprotein 1 (SPP1), mRNA [NM_174187]	GAAGACAAACACCTGAAAATTCGTATTTCTCATGAATTAGATAGTGCCTCTTCTGAGGTC
A_73_100275	0.00777191	9.03357e-05	down	1.50627	-1.50627	-0.590983		Rep: MGC157157 protein - Bos taurus (Bovine), complete [TC391593]	ACAGTTCTAAGAGCAGTCTTTTGGCTCAGACCATTTCTTGTTCTGTTTTCAATGAAATCA
A_73_P461976,A_73_114860|511077	0.00409472	6.3441e-06	down	1.50679	-1.50679	-0.591482	MYC	Bos taurus MYC proto-oncogene, bHLH transcription factor (MYC), mRNA [NM_001046074]	AGCAGAGCAGCAAAAGCTCAAGTCAGAAATAGACGTGTTGCAGAAAAGGCGAGAACAGTT///TATGCATGAACAACCTCACAACCTTGGCTGGATCTTTAAGACTGAAAGATTTAGCCATAC
A_73_109354	0.00826119	0.000106716	down	1.50684	-1.50684	-0.591529		Rep: Translocation-associated membrane protein 1 - Bos taurus (Bovine), partial (69%) [TC483573]	TAGTAGCTCTCTGTAGCATCATGGAGTTTCCGTGGAACCAAATCTCTGCCATTGAAAACC
A_73_P061681|514865	0.0256036	0.00120491	down	1.50881	-1.50881	-0.593415	CHKA	choline kinase alpha [Source:HGNC Symbol;Acc:HGNC:1937] [ENSBTAT00000013607]	TAGTGCAATATTGCAGTATCTCAGACCCTCTCATCTAGAGAAGACGTTTCTGTCGCAGTC
A_73_P417631,A_73_101112,A_73_110687|523962	0.0480907	0.00399305	down	1.50924	-1.50924	-0.593822	MAP3K1	Bos taurus mitogen-activated protein kinase kinase kinase 1 (MAP3K1), mRNA [NM_001205906]	AACAGCATGACACTTGATTTGAACAGTAGGTCCAAATGTGATGACAGCTTTGGCAGTAGC///GATTCCTAAGACTTCCAGGGCTTAAGGGCTAACTTCTATTAGCACCTTACTGTGTAAGCA///CATCGAGAGAGCTACTGAAGCATCCAGTCTTCCGTACTACGTGGTAGCCAATTATACAAA
A_73_121244	0.0346626	0.00215824	down	1.50949	-1.50949	-0.594064		PREDICTED: Bos taurus MAX dimerization protein 4 (MXD4), transcript variant X1, misc_RNA [XR_001500534]	CTGGGGAGCTGTGTTCTGAATTCTAGAGCATCAATTCTCCAGCAACCCCCATCCTCACCC
A_73_P432086,A_73_107187|509055	0.0198036	0.000695048	down	1.51012	-1.51012	-0.594659	C29H11orf24	Bos taurus chromosome 29 open reading frame, human C11orf24 (C29H11orf24), mRNA [NM_001075388]	AGAAAAACTCATCCGTGGAAACAGCGACCGAAGTCTTGAACACAACAGCTGAGAGAATGA///ATATTTATTTTTGTAACAATCATGTTGACACAGGGCCAGTGGTTCTGCCTCAGGATGGGG
A_73_106653	0.0386664	0.00264622	down	1.51093	-1.51093	-0.595434		Rep: Complement component 1 precursor - Rattus norvegicus (Rat), partial (13%) [TC465910]	CTGTAGTCCACCTTCAAATACTCAAACTCTTGGCTTCACCAAGCACAACCCATGGCTGCA
A_73_102676,A_73_P090536|504823	0.00672404	6.06402e-05	down	1.51204	-1.51204	-0.596495	NUP107	nucleoporin 107 [Source:HGNC Symbol;Acc:HGNC:29914] [ENSBTAT00000045218]	TAATGCTCCTCGACCAGGGCCTTGATCCATTAGGATATGAAATTCAGTCATGATTCATTC///TCCTCTCTAATGCTCCTCGACCAGGGCCTTGATCCATTAGGATATGAAATTCAGTCATGA
A_73_P348491,A_73_P251501,A_73_120112|338062	0.0244687	0.00107749	down	1.5124	-1.5124	-0.596839	FCGRT	Bos taurus Fc fragment of IgG receptor and transporter (FCGRT), mRNA [NM_176657]	AATGTCTCGGTGCCGGTGGCCAAGTTTGCCCTGAACGGCGAGGAGTTCATGATGTTTGAC///TTTTTTAGGGAATTGCGAGGGGGGATAAATGGTGTAAGCCTTGGGCTTCAAATCTCTCCT///TGAGGCTAACTTGTTGCCATGGTGGAATTTGCCAACTTTATATACCAAGTCATGTATTTT
A_73_P049131,A_73_P247611|616368	0.0379559	0.00255816	down	1.51258	-1.51258	-0.597014	IGFBP7	Bos taurus insulin like growth factor binding protein 7 (IGFBP7), mRNA [NM_001102300]	TTCATCCAGTCCACTAACACTTGAGCTATATTCACTGATTTTACACAGTGAAATACGAAA///AACCAGTTTCTTTTCATCCAGTCTACTAACACTTGAGCTATATTCACTGATTTTACACAG
A_73_P277796,A_73_120760,A_73_P457253,A_73_P271156|280750	0.0410366	0.00294917	down	1.51346	-1.51346	-0.597853	CLU	Bos taurus clusterin (CLU), mRNA [NM_173902]	TCACGGGAAAAACTTGCTCGCATGCCACTAACTCAAAAACCCCCTTGTAATCTGAAAAAA///TCCTCTGAAACGCACTAATGCCTGCGTTTGCTGATCACGGGAAGAACTTGCTCGCATGCC///AATACCGCCGGAAGAGCCAGGAGGAGTGAGGCGTGAAAGTTGCTTTTGCAAGTATCGGGC///AACCAATGAAGAGCGCAAATTACTGCTCAGCTCCCTAGAGGAAGCCAAGAAGAAGAAAGA
A_73_P083161|783763	0.00657759	5.66539e-05	down	1.51483	-1.51483	-0.599157	LHX2	Bos taurus LIM homeobox 2 (LHX2), mRNA [NM_001191175]	TGCCACGTGCCTTAGGAATACTGTTTTATCTCCATACTTTGGATGACTTGTTCATTTTTT
A_73_106972|505094	0.00409472	7.79894e-06	down	1.5159	-1.5159	-0.600172	PRODH	Bos taurus proline dehydrogenase (oxidase) 1 (PRODH), mRNA [NM_001075185]	AGCCCCACACTGGGCAGCGGCTGGCTGCAGAAGATGGCCTGTCAATAAACCACTTTTCTA
A_73_P409471	0.0135523	0.00031633	down	1.51623	-1.51623	-0.600484		CR553053 Normalized and Subtracted bovine embryonic and extraembryonic tissues (bcaz [CR553053]	CACCACATGGAGTGCAGAAGAAGTAATTGGAAATTTCAGATCAATTCAGTTTTAAACACT
A_73_106298,A_73_P296436|534021	0.0119746	0.000240642	down	1.51659	-1.51659	-0.600831	PGRMC2	Bos taurus progesterone receptor membrane component 2 (PGRMC2), mRNA [NM_001099060]	GAAAGCCCCTATGTGAATTCTGAAGTCACTACAAAGCAGCATTGAGACTGAAATTGGAAT///TTCCCCAACAGCAAGATCATTTGAAACTAGTTTTTATCCCTTTCCTTCCCCTAGATCAAA
A_73_P044861,A_73_P279861,A_73_P397086|537290	0.0276326	0.00140261	down	1.51697	-1.51697	-0.601197	TWSG1	Bos taurus twisted gastrulation BMP signaling modulator 1 (TWSG1), mRNA [NM_001076089]	AGTACCAAACCAAATGATAATCCAAGTGCAGTGAGATACATAGATGCTATAAAAGAGTCA///GCTTCATTTCCACTTTACTGTTTTTCAGAGTCACTTATACTAAGGAATAGAGGAATGCTT///TACAAGAATTGCCTGTCATACCTGAGGCTTTGTGAAGAGAACGGCTCAGTAAACAGGAAG
A_73_111355,A_73_P363951|509263	0.0223346	0.000906389	down	1.51717	-1.51717	-0.601387	C16H1orf159	Bos taurus chromosome 16 open reading frame, human C1orf159 (C16H1orf159), mRNA [NM_001031755]	CTCGGTCACCAGGACATGAATGGATGACTAGCTGGTGGTCATGAGGGGCAACCACCTGAA///TCTCCGTGGCTGCATTCTTCTACCTCAAGCGAGCCAGCAAGCTGCCCAAGGTCTTCTATG
A_73_108268,A_73_P112951|616080	0.0129167	0.000287935	down	1.51801	-1.51801	-0.602184	RNFT1	Bos taurus ring finger protein, transmembrane 1 (RNFT1), mRNA [NM_001076407]	TCAGCTTTAATGTTCATGATTTTGCTTTTTGTATAGTGCCATGGACTTTCTTGAATTAAC///ATTTCGGACCATATAAACAAATGGAAAGATGGAGCCACTTCATCACACCTTCAAATATAT
A_73_119726,A_73_P455596|537837	0.034549	0.00213381	down	1.51827	-1.51827	-0.602428	CPZ	Bos taurus carboxypeptidase Z (CPZ), mRNA [NM_001083486]	ATGGACAGGTCGGAGAACAGGTGTGGGGGCAACTTCCTGAAGAGGGGCAGCATCATCAAT///AAGCTCATCGGTAACATCCATGGTAACGAGGTCGTGGGCCGCGAGATGCTCATCTACCTG
A_73_P102681,A_73_104923,A_73_P087621,A_73_P105811,A_73_P335221,A_73_114320|282301	0.0285663	0.0014804	down	1.52013	-1.52013	-0.604197	PDGFRA	Bos taurus platelet derived growth factor receptor alpha (PDGFRA), mRNA [NM_001192345]	GCACATTTACATCTACGTGCCAGACCCAGATGTAGCCTTCGTACCTCTAGGAATGACGGA///TAACTCGGTAGGAAGGGTCTACCAATACAATTGTATTACAAATGCCCCTGTTCATTGTTT///ATATAAAAAGAGTTATGAAAAGATCCACCTGGACTTTCTGAAGAGTGACCATCCCGCTGT///AATCTCACGGAGATCACCACTGACATAGAAAAGATTCAGGAAATAAGTTATCGAAGCAAA///TATAGACTTGGAGAATACTGCCAAAACATTTATGACAAGCTGTATCACTGCCTTTGTTTA///TGTGAAGTACATGCAAAACCACTTTTGAACCTTAAAAGGTACTGGTACTATAGCATTTTG
A_73_105620	0.0157254	0.000427865	down	1.52083	-1.52083	-0.604854		Rep: LOC504320 protein - Bos taurus (Bovine), complete [TC439963]	TCCCCAACGGGAAGGATCTAATGCCTCATGATCTGAGATGGAGCTGATGTGATACTAATA
A_73_P066256,A_73_116046|506184	0.0314658	0.00179324	down	1.52111	-1.52111	-0.605123	HEXDC	Bos taurus hexosaminidase D (HEXDC), mRNA [NM_001101864]	CAAGAGTGGAGAACTTTCTTGGGATTTCGAGCCTAGAGGAAATGAGTTTTAGGAGTGAGG///GGCCTGTGCAGTGATCAGCATTAGAACTTTCTTTTGAAATAAAAAAGAGAGTGGAATCCT
A_73_P124246	0.0250737	0.00113342	down	1.52171	-1.52171	-0.605696		BKV603001673.R1 CSEQFN23 thyroid and parathyroid Bos taurus cDNA, mRNA sequence [CB170803]	CTACTTTCTGTTCGCAACTAAAACATTATACAATGAGATGGACTTGGTAAGTCAAACCTT
A_73_P185822,A_73_P050931|509037	0.0194535	0.000670122	down	1.524	-1.524	-0.607864	TMX1	Bos taurus thioredoxin related transmembrane protein 1 (TMX1), mRNA [NM_001075385]	CTCTACTTTCTATTGTGGTATTTCACAGATGGGTATCAGCAAGATGGGACATTTAATATA///GTCTCAAGAAATGTGTATTTCAGTAACAACTCTGAAACCCTTTATCTCCTTTAAAGTCCA
A_73_P285901,A_73_103674|534097	0.00409472	9.82995e-06	down	1.52458	-1.52458	-0.608417	DPM1	Bos taurus dolichyl-phosphate mannosyltransferase subunit 1, catalytic (DPM1), mRNA [NM_001076013]	TCAGATTAGGAAAACGAGCAGTGTTCTTACTTTTCGTTTACATGTTGCTGTATTAAGACC///ATGGAGATGATTGTTCGAGCGAGACAGCTGAATTATACTATTGGCGAGGTTCCAATATCA
A_73_107667,A_73_P425721,A_73_P249056|615728	0.00409472	8.05144e-06	down	1.5249	-1.5249	-0.608719	SYPL1	Bos taurus synaptophysin like 1 (SYPL1), mRNA [NM_001110088]	TCGCCTTATTTTGGTTGCTTTTGTTCACAAGAATTGTTAATATGAGAATGTGTATCCACC///ACTTGTAATGTTCAAGGAGTGATGTGCCCGTTTGTCTCTGTGACTAGTATGGGATCCCTA///TTGTACAGGGCCAGATCTCCTCTTAGCCACTTGATTGTTTTTATGTGAAACACATCTTAC
A_73_102422	0.0180918	0.000583229	down	1.52533	-1.52533	-0.609118		Rep: PAOX protein - Bos taurus (Bovine), partial (5%) [TC402937]	TTCCAAAGGGTGTCTGGGAAATATCGTTTACTTATGAGTTAAAAAGTCTCTTTTCTCGGA
A_73_118737	0.0468745	0.00375911	down	1.52648	-1.52648	-0.610213		PREDICTED: Bos taurus uncharacterized LOC524181 (LOC524181), mRNA [XM_002702390]	TGCAAATATGTTCTGTAGCCTACTGATGAACCAGGAAGTCAGTACCATCATTAATATTTT
A_73_P400776,A_73_P111606,A_73_106763,A_73_P277371,A_73_P343436|515911	0.0159468	0.000447846	down	1.52784	-1.52784	-0.611491	STRA6	Bos taurus stimulated by retinoic acid 6 (STRA6), mRNA [NM_001075730]	TTGGAAGATACTGGCTCTGCTGTATTACCCTGCCCTCTACTATCCGCTGGCTGCCTGTGC///GGTATGCCCTTAGAGATTATGAAAGAGGTTAATGTGCTCTCTGTAAAAAACTTGTGCTTG///GTTGGTATGCCCTTAGAGATTATGAAAGAGGTTAGTGTGCTCTCTGTAATAAACTTGTGC///TCTGGTTGGATCGAAGTCTATCAGCACTATGAGCCTCGAGCCTCGGGAAGGCTCTGGTCT///GAGAGCTAAAAGCAAGAAAGTAACCTTTAGGATTAAAGAGAAACGTTTCTTTGTTTGGGT
A_73_P495318	0.0416837	0.00302903	down	1.52849	-1.52849	-0.612104			TGATGTGTTTTCTGAAAACATGTTCTGTGCTGGGAGCCCAACCTTAAAGCACGATGTCTG
A_73_P343111,A_73_P289911,A_73_100526|518158	0.0153258	0.00040471	down	1.52894	-1.52894	-0.612534	ADPGK	Bos taurus ADP dependent glucokinase (ADPGK), mRNA [NM_001082438]	TATTTGTCCCACCAGAGTCATTGCAGGAAGTGGATGAGTTCCACCTCATTTTAGAGTATC///CTCGTTGTTTATTTTTATGTTGTGTGTTACAGGGGTAAAAACTTGATTCTCCAACCCCTT///GATCATGTATATTTTACAGTGATACATCACATCTGTTAAAGAGTTCAACCTCCTAAGAGC
A_73_115913,A_73_P286981|514943	0.00806579	0.00010017	down	1.52971	-1.52971	-0.613263	RHBDL2	Bos taurus rhomboid like 2 (RHBDL2), mRNA [NM_001102014]	AGAACTTGCTCTTAGGAGGATATGGTATAGAGATTGCTTGATAGAATCCACAAATAATGT///ACCCCTGAAGTTGTCGGTTTCAAAGACTGCTTACAAAAGGGGTTAGGGTTTAAGGAAGGA
A_73_P446101,A_73_P314211,A_73_P307291,A_73_112282|767942	0.0371001	0.00244149	down	1.53065	-1.53065	-0.614147	GRN	granulin precursor [Source:HGNC Symbol;Acc:HGNC:4601] [ENSBTAT00000054338]	AAGCATCACTGCTGTCCCAGTGGCTTCCGCTGTGCAGCCAGGGGGACCAAGTGCTTACGT///ATAACGTCACCAGCTGTCCTTCTTCCACTACCTGCTGTCGACTCAAGTCTGGGGAGTGGG///AAGAAGATGCCTGCACACAAGACTAAAAGTTCAGTGATCTTATGCCCAGATGGACAGTCC///AAGCTGCCATCCCCTCCCCCAATTTCTGTCAACTCTGTGGCCAGGTGCTCTTCCTATCCA
A_73_115219|782247	0.0240047	0.00102813	down	1.53144	-1.53144	-0.614888	ARHGEF3	Rho guanine nucleotide exchange factor 3 [Source:HGNC Symbol;Acc:HGNC:683] [ENSBTAT00000018734]	CACTTTGGCCAGCATGTTGAGAAAAGAGATCTGTCAAGGACTGGCCTATGAGAAGAAAGT
A_73_P164082,A_73_110235|534788	0.0242085	0.00104424	down	1.53226	-1.53226	-0.615664	UXS1	Bos taurus UDP-glucuronate decarboxylase 1 (UXS1), mRNA [NM_001206064]	TGCTTGAGAGCTTTGTGATGTTTCTTCTAATGCAGAATTTTTCCAAGGTCTAGTTTTTAG///CCGAGCCTGCTATGACGAAGGGAAGCGAGTCGCTGAGACCATGTGCTATGCCTACATGAA
A_73_110083,A_73_111090|509995	0.00307331	2.8325e-06	down	1.53277	-1.53277	-0.61614	LRPPRC	leucine rich pentatricopeptide repeat containing [Source:HGNC Symbol;Acc:HGNC:15714] [ENSBTAT00000021773]	ATGCAAAGCAGCTAAAGGAGTCAAAGGAAACCCATTTGTGAAGCAAGCCAGCACTATTTT///CAGGAGACGTACGTTAATTACGTGTTTCCGAGCTTTGATAGTATAGAGTCAGTTCGTGCT
A_73_P061581,A_73_P340681,A_73_113395|532772	0.0297159	0.0015864	down	1.53287	-1.53287	-0.616234	LTBP3	Bos taurus latent transforming growth factor beta binding protein 3 (LTBP3), mRNA [NM_001192738]	GCCGGCCTTCCTTCCAGAGGGCATTTCCCCAGAAACTGATAAATCAGATCGTTTCTCTTT///ACAACATTGTCAACTATGGCATCCCAGCCCACCGTGACATCGATGAATGCATATTGTTTG///GAGAAACACTTACTGCTCTCGGGCTCCAGGCCTTCCCAGTTGTCATCACCCCATGAGTCT
A_73_P425676,A_73_P428901,A_73_102471|510807	0.0125431	0.000272498	down	1.53307	-1.53307	-0.616423	NFE2L3	Bos taurus nuclear factor, erythroid 2 like 3 (NFE2L3), mRNA [NM_001077899]	GCCGAAAGCGTAAACTGGATGTAATTTTGAATCTGGAAGATGATGTATGTAGCTTGCAAG///ACTTAATGTCTTTGGCCACAGGTTTTGATCCCATGGAAGTTCCTTGGCTGCTTGAAGAAC///AATGCAATTTAACCTTAAGGTTCTTTCACTTAGCACTGAAGTTGGGTGTTTTTTCAAGAG
A_73_114298	0.0194292	0.000667063	down	1.53476	-1.53476	-0.618009		Rep: Phosphate ABC transporter, inner membrane subunit PstA - Thermotoga sp. RQ2, partial (8%) [TC422045]	TGAAAACTTCTTTATCCTCTACAAAGTACCTGAAAACTTTAAGTGGGAAAGATTCCTCTG
A_73_P052221,A_73_P353181,A_73_P108366|281661	0.0154478	0.000410873	down	1.53568	-1.53568	-0.618876	CAPN1	Bos taurus calpain 1 (CAPN1), mRNA [NM_174259]	ATCTGGATGGAGTGGTGACCTTTGACTTGTTTAAGTGGTTACAGCTGACCATGTTTGCGT///TTCCATTTCCAGCTGTGGCAGTTTGGTGAGTGGGTGGATGTGGTGGTGGATGACCTGCTG///AAACTGGGCCTGGTGGAGTTCAACATCCTATGGAACGGATCCGGAATTACCTGGCCATCT
A_73_P087122,A_73_110741|100125834	0.0140489	0.000341905	down	1.53591	-1.53591	-0.619093	STOM	Bos taurus stomatin (STOM), mRNA [NM_001105473]	GGACTATTTCATTTGATATTCCTCCTCAGGAGATCCTCACTAAGGACTCGGTCACCATCA///CCAGCTAAATACTTACCACAGAAGTGCTTTTTTCTCACTTTTGCCTATTCTCATATGTCA
A_73_109518	0.0311635	0.00174802	down	1.53724	-1.53724	-0.620346		Rep: Pb1 protein - Mus musculus (Mouse), partial (5%) [TC484661]	TGTGCTAGTCTCCTTTGCTGCATGGACTTCAAACTGCATGAAATGCAATAAATTTCATTT
A_73_P358806,A_73_P095391|519213	0.0174108	0.0005354	down	1.53743	-1.53743	-0.620525	PIGV	Bos taurus phosphatidylinositol glycan anchor biosynthesis class V (PIGV), mRNA [NM_001192505]	ATTGGCTTCCTCATACATTCTCAGTGCCAGGGCTTTTTCTCATCTCTCATGGTGCACAAT///ATTGTGTACTGGTTTTCAGCTCACTTGCTTCTGGATCAAGAACCGCTGCTGAAATCCCTA
A_73_104507	0.0283825	0.00146547	down	1.53844	-1.53844	-0.621467		Rep: Trimethyllysine dioxygenase, mitochondrial precursor - Bos taurus (Bovine), partial (42%) [TC409029]	TCTCCTAGAACTATAGATATTGTAGGAATTGCTTCATAGCACAAGCTCAATGATAAGGTG
A_73_108088	0.0308814	0.00172118	down	1.53862	-1.53862	-0.621636		Rep: Isoform EP3D of P34979 - Bos taurus (Bovine), partial (5%) [TC423954]	CACCAGGAGGATTTTTGAACAAATTATGGTACATTCAGGATGTAATGTTTCATAGCCATC
A_73_P050001,A_73_P334391|100125876	0.0165575	0.000486984	down	1.53927	-1.53927	-0.622249	GLMP	Bos taurus glycosylated lysosomal membrane protein (GLMP), mRNA [NM_001105476]	AATGAGAGAGGCCTTCTGACTGTTTGGTGCCCTGGAAGGCATGAAATAGACTAGTTTTTT///AGCAGCACTCCATCGATGACGAGTATACCCCTGCTGTGTTCCAGCTGGACCAGCTGCTAT
A_73_P253566,A_73_108281,A_73_P033891|513193	0.00752725	8.13304e-05	down	1.53981	-1.53981	-0.622748	PLSCR2	Bos taurus phospholipid scramblase 1 (PLSCR1), mRNA [NM_001034436]	TAACTTTGGCATCCAGTTCCCATTAGACCTTGATGTGAAAATGAAAGCTGTGATGCTCGG///TGGTCTATTAGATTATTTTTGCCAACAATTAAATAACTAAAATAAAACATTGCTGATATA///GTGTACCAAAGAAGGACACACTTAGAGATTCACTCACTCTAAAACTGGGATACTATAATA
A_73_106373,A_73_P306621,A_73_P387426|510635	0.012371	0.000261486	down	1.54142	-1.54142	-0.624264	MFSD14B	Bos taurus major facilitator superfamily domain containing 14B (MFSD14B), mRNA [NM_001083662]	TTTTGCTGCACGGTAAGTGGAGCATTAACTAGGGCCCATCTTTAACATAGCACTCCTTTG///TATCTGGAGTCTTCTCAGTCACGTTCTCTGTGATATTTGCCTATGTAGCTGATGTCACTC///TACAGTAAAGGTGGAATTCAAAAACACAGCAACAGTATCAGTGGCAGCCTGGCCAACACT
A_73_108615	0.0148924	0.00038305	down	1.54473	-1.54473	-0.62735		Rep: Chromosome undetermined scaffold_47, whole genome shotgun sequence - Paramecium tetraurelia, partial (10%) [TC444409]	TTAGTGTTGCTCAAATGCTTTATACTTATGAACAGACACAGCCATATTATATGAGCACTG
A_73_P045046|614746	0.0267498	0.00132827	down	1.54495	-1.54495	-0.627559	EIF2A	Bos taurus eukaryotic translation initiation factor 2A, 65kDa (EIF2A), mRNA [NM_001102283]	CTGTTTAGCTAAGCTTGACAGATTGAAAGACTAATGTCATTGTTTTTTAGTAGGAGACAG
A_73_P111571,A_73_P254341,A_73_117206|513055	0.0224465	0.000920337	down	1.54589	-1.54589	-0.628433	RGS2	Bos taurus regulator of G-protein signaling 2, 24kDa (RGS2), mRNA [NM_001075596]	GCCAAAACTGTCCTGATGGCAGCTAAACTTTGAAGTGGTCTTTGAATACTTTTAATAAAT///GCAGGAGCTTAAGACTGAAAGATAACAATGTAACACTATTGGTCCAGAAGCATTTACAAT///GTACTAGAATGAGTGCTTTTGTGTAGAAAATGACAATGTCCATTATGAGTGCCAAAACTG
A_73_106769	0.0223336	0.000904646	down	1.54604	-1.54604	-0.628576		Rep: MKIAA0984 protein - Mus musculus (Mouse), partial (91%) [TC398521]	TTATTGCAGTTGGGGTCTGGAATTTGGGGCTCTCCAAAGTTAGCATGCAGCTTCTTAAAA
A_73_P069696|526376	0.0405694	0.00288158	down	1.54648	-1.54648	-0.628992	STK10	Bos taurus serine/threonine kinase 10 (STK10), mRNA [NM_001192627]	ATCTGAACCAGAAAAAGCGAGAGCAGGAGATGTTCTTCAAGATGAACGAGGAGTCAGAGT
A_73_112455	0.0222849	0.000893334	down	1.54766	-1.54766	-0.630085			GTTTCAGGAGTGGGTTAATCTTCCATTAATTGGCTACTACAGGAAAGTTTGCTAATACAC
A_73_P042646,A_73_P251706|282493	0.0347808	0.00217253	down	1.54775	-1.54775	-0.630173	BOLA-DOB	Bos taurus major histocompatibility complex, class II, DO beta (BOLA-DOB), mRNA [NM_001013600]	AGAAAAGGTGCGGTTTGTGGTCAGATTCATCTTCAACCTGGAGGATTATGCACGTTTCGA///ATCTTAGAGGAGTCCTGAACTAACTCTGGAGTGCTGTGTTCTGAGATCACGCATCTCTTA
A_73_P299036	0.0294628	0.00155974	down	1.54782	-1.54782	-0.630238		000707BINA001120HT BINA Bos taurus cDNA, mRNA sequence [DY090673]	AAGAAAAATACTTGAGGCCTTCTCCAAGATTCTTATTTCACCCACAAATGTCGGCTATTG
A_73_102514	0.00435281	1.2017e-05	down	1.54856	-1.54856	-0.630925		Rep: Protein-L-isoaspartate(D-aspartate) O-methyltransferase - Bos taurus (Bovine), partial (22%) [TC405412]	TGCTGTGTAAGCTGTGTCCTAGTTACTGAACAGTTTATGCAGTGCTGCTTTGCCAAATAA
A_73_P044731,A_73_P276666|616451	0.0217004	0.000851711	down	1.54892	-1.54892	-0.63126	TRMU	Bos taurus tRNA 5-methylaminomethyl-2-thiouridylate methyltransferase (TRMU), transcript variant 1, mRNA [NM_001163188]	TTCTATAGAAGACAACAAGGTTCTGGGGACACACAAAGGTTGGTTCCTGTACACTTTGGG///GTCGATTTATTTCTATAGAAGACAACAAGGTTCTGGGGACACACAAAGGTTGGTTCCTGT
A_73_P088401|537777	0.0273077	0.0013721	down	1.55281	-1.55281	-0.634883	SEMA3A	Bos taurus sema domain, immunoglobulin domain (Ig), short basic domain, secreted, (semaphorin) 3A (SEMA3A), mRNA [NM_001276701]	CAAATGGAAGCACTTACAGGAAAATAAGAAAGGCAGAAACAGGAGGACCCACGAATTTGA
A_73_P068836,A_73_P126181,A_73_P317426,A_73_P400486,A_73_P426131|281690	0.0446898	0.00342798	down	1.55341	-1.55341	-0.635436	CHSY1	Bos taurus chondroitin sulfate synthase 1 (CHSY1), mRNA [NM_001191157]	AGAGATTCTGGAATGGGAATTTCTGACTGGGAAATACTTGTATTCAGCCGCTGACAGCCA///GAGGTCTGCTTATTTGTAAATAGCCTATTGCTCATTTGGAAAAATAAACCAGTGGACAAT///GAAATGAATCTGTCATTACACCAGAAAGTTTGTTTTAGACTCACAGAACAAATGTGCCTT///TGTGAGATTTATGGGGAACTTTGAGAAGACGTGCCTCATTCCGAATCAAAACGTCAAGCT///CAGTGGACAATATTTTTCTATCGTACTTTGCAAAACCATTTTGTTCTCAGTACTCCTGTT
A_73_P090051|618145	0.00900926	0.000135157	down	1.55526	-1.55526	-0.637157	CEP83	Bos taurus centrosomal protein 83 (CEP83), mRNA [NM_001206525]	AAAGAGAATTCTAGTGCTCAGGCAGAAAATGTCCAAAGAATTCAGGTGCGGCAGTTGGCT
A_73_118840,A_73_P252986,A_73_P049501,A_73_P270496|514076	0.0192378	0.00065829	down	1.55587	-1.55587	-0.637723	CFB	Bos taurus complement factor B (CFB), mRNA [NM_001040526]	AGGATCTGGGTTTTCTATAAGGGGTTTCCTGCTGGAAAGGGGCATGAGACCAAATTAAAA///TGTTCAAACTCCAAGGCATGGAAAACCTGGAGGATGTTTTCGTCCAAATGCTTGATGAAA///TACCAGGTGCTGCCCTGGCTCAAGGAAAAACTCCAAAATGAGGATCTGGGTTTTCTATAA///ATGGTCTAGTGACATATGCCACAGAACCCAAAGTTTTGATCAGAGTGTCCGACCCAAAGA
A_73_102281,A_73_P363141|509522	0.0126907	0.000279995	down	1.55844	-1.55844	-0.640102	FUCA1	Bos taurus fucosidase, alpha-L- 1, tissue (FUCA1), mRNA [NM_001046035]	GTTTGCAAAGCAAGCTAAGAGCTCTGACATTCAGTCTGTTTACAGGGATTCTATGAAGAA///CTCTTCCAACTGAGTTTGCTTGGACCATAAAGCTGACAGGAGTGAAGTGATCATTGGAGT
A_73_P081476,A_73_P081471,A_73_P165357,A_73_P304881|615535	0.0282329	0.00145559	down	1.55853	-1.55853	-0.640183	ENPP1	Bos taurus ectonucleotide pyrophosphatase/phosphodiesterase 1 (ENPP1), mRNA [NM_001206212]	ACAGCTCGGATCACAGATGTTGAACACATCACCGGACTCAGCTTCTATCAAGAAAGAAAA///GAGCCAATTTCAGACATTTTAAAGTTGAAAACACATTTGCCAACCTTTAACCAAGAAGAC///TTTAGATGCCATGGCTTTCATTTTGCCTCACAAGACTGACAATAGTGAAAGCTGTGCGCA///TCACAGGACTTTATCCGGAATCCCATGGCATCATTGACAATAATATATATGATCCCCAAA
A_73_120844	0.0360332	0.00232459	down	1.5592	-1.5592	-0.640803		Rep: PREDICTED: kelch-like 8 isoform 5 - Pan troglodytes, complete [TC401350]	GCTGTTTGCCACCATCATAGTTTTTCTAACTGTACAGAATCTGGATTTATTTATTATGGG
A_73_101188,A_73_P082291|537010	0.0390584	0.00269945	down	1.56083	-1.56083	-0.642312	STRN	Bos taurus striatin (STRN), mRNA [NM_001206104]	TTTTAATGGTCCAAAGGGTATGGTTAACCTCAGGCAGCTGTCTTTGCAGAATTACTAAAT///AAATGCTATATAGCCAGTGCTGGGGCGGATGCACTGGCTAAAGTCTTTGTATGACACAAT
A_73_P465503,A_73_121033,A_73_P409346|535442	0.0282156	0.00145362	down	1.56357	-1.56357	-0.644842	SGSH	Bos taurus N-sulfoglucosamine sulfohydrolase (SGSH), mRNA [NM_001102189]	TTGGATTGGCTCTCCATCCCCTACCCTAACTATGCCATCTTTGGCACAAAGACCGTCCAA///TGCGGAACGTGGGAGGGAAGCCACTGGCCTGAGCATTTTGTAAAAGCTTTTTATTTTAGT///AACCTGTACTGGCCAGGCACTGCAGAGCCCATGCTGGTATCGTCTCCAGAGCATCCAAAA
A_73_114589|534904	0.00737683	7.5334e-05	down	1.56382	-1.56382	-0.645078	GALNT11	polypeptide N-acetylgalactosaminyltransferase 11 [Source:HGNC Symbol;Acc:HGNC:19875] [ENSBTAT00000028329]	GATAAAGCCCAGGAGATTGATGTGTCTGCTCAGATTTATTTGATCAGGAACTTGTCGTGA
A_73_109314	0.023624	0.000998153	down	1.56465	-1.56465	-0.645838		Rep: 4-hydroxyphenylpyruvate dioxygenase - Bos taurus (Bovine), complete [TC437742]	GAACCAAAGGGTGAAGAGGACTTACACTCTAAAGGAAAACACAGACAAATCTTTTTGTGG
A_73_P043086,A_73_P106431,A_73_P207447,A_73_P279171|522919	0.0386664	0.00264092	down	1.56674	-1.56674	-0.647766	GNPDA1	Bos taurus glucosamine-6-phosphate deaminase 1 (GNPDA1), mRNA [NM_001080287]	ACCAAAAATATACCAACTCTGGAAGTTGCCTAATATCCTTTCCCCACATAAAATACCCTA///TGTTCTTGGCTATGCAGCATGGAGTTTGGTCATGGAGTTTAGCTACTTGTTTGTAACTTA///CGTGATTGTACTGCCATTCTGTTTTAAGCTAATGGATCAATGAACTTGTTTACAATGTGA///TTTGTGTGCGACGAGGACGCTACCCTGGAGTTGAAAGTGAAGACTGTCAAGTATTTCAAA
A_73_103406|281603	0.00843702	0.000112094	down	1.56865	-1.56865	-0.649528	ADCY7	Bos taurus adenylate cyclase 7 (ADCY7), mRNA [NM_174230]	GTACATGTATAGAGGTATGCTTTGAGACAGTACATGAAACGACTAGGGGTTATTCTATAT
A_73_P471353,A_73_P085766,A_73_P290776|521539	0.00913382	0.000143871	down	1.56882	-1.56882	-0.649678	MAN2A1	Bos taurus mannosidase, alpha, class 2A, member 1 (MAN2A1), mRNA [NM_001205886]	AAGCTCTTCAGCAAGTTCACTGTTGTGAGCATCACACCTTCGTCATTATCCCTGATGCAT///GATAAAAAGCTGGTGGGTAATAGCTAATGGCCAAAATGGTTGCAATCATTCATACGTGTT///AGAAAAGAGAAGTGTCGTGAATATGGAAGAAGAACCAGAAGGCAGTCAGTTACCCTTCCC
A_73_108381,A_73_P231922,A_73_P382481|505016	0.0243506	0.00105977	down	1.56895	-1.56895	-0.649797	LAT2	Bos taurus linker for activation of T-cells family member 2 (LAT2), mRNA [NM_001075183]	CAGAGTCAGGGAGACAAAGCGCCTCCTTCGACTGAAACGTCTCAATAAACATTTCCAATT///TCATCTGCAAGCCAAAGAGAATGGAATCAGTGGATGAGGGGTCTGAGGATTATCAGAACT///AAGTCTGAGAAAATCTATGAGCAGAGGAGTCTGCAAGAGAATCAGCAGAGCTTTGCAGTG
A_73_P032796|338038	0.00481236	1.5587e-05	down	1.57117	-1.57117	-0.651843	ATP6V0A2	Bos taurus ATPase H+ transporting V0 subunit a2 (ATP6V0A2), mRNA [NM_176637]	ACCAACAATTTCAGGGCACTGTTAACTGACTAGTAAACAGGAAACCTACAGGATCTGCCA
A_73_104824|504417	0.0402728	0.0028421	down	1.575	-1.575	-0.65535	PBLD	Bos taurus phenazine biosynthesis like protein domain containing (PBLD), mRNA [NM_001045886]	GACTGCCATTGGTGACACATTGGTTCAAGATGTTCGCTATTCCCCAGATACCAAAAAGCT
A_73_114720	0.00594292	4.14417e-05	down	1.57619	-1.57619	-0.656446		Rep: 1,2-dihydroxy-3-keto-5-methylthiopentene dioxygenase - Bos taurus (Bovine), complete [TC407841]	CATAGAAAAACCCTGAATTAGCCTCAGATGTGAAGGGCAGTTTGCTTTGGGTATTCTTTT
A_73_P299816,A_73_102796|512999	0.0140439	0.000340355	down	1.57802	-1.57802	-0.658117	MANSC1	Bos taurus MANSC domain containing 1 (MANSC1), mRNA [NM_001075592]	TATAAAGAAGAAGGCCACTCTCAGACGTCACAGTCTTCCTCAGGACCAGCAATAGCTAAT///GTTAGGATTCCTAGGCTCCATTTCACTAATGTTTCTGGTTCCAGATAAAGTTGACTGTTT
A_73_P453226,A_73_P474088,A_73_114872,A_73_P081451,A_73_P081446|509657	0.00542407	2.81853e-05	down	1.57803	-1.57803	-0.658122	PTPRK	Bos taurus protein tyrosine phosphatase, receptor type, K (PTPRK), mRNA [NM_001191537]	AAAGCATTCTAGTATCCTCTTTTTAGATTGCCAGTTCATGACATGGTGCTTATGAAGATT///AAACGGTCATTTTTGAAGCTGATCCTGCAGGTGGAAAAATGGCAGGAGGAATGTGAGGAA///GACTAAAGCATTCTAGTATCCTCTTTTTAGATTGCCAGTTCATGACATGGTGCTTATGAA///ATGGCATTTGGATCCAGATACCGAATATGAGATCCGTGTTCTGCTTACAAGACCAGGTGA///AATGTTGTTGACGTGTTCCATGCAGTCAAGACACTAAGGAACAGCAAGCCAAACATGGTG
A_73_P056101,A_73_P398386|541114	0.00900926	0.000136319	down	1.57912	-1.57912	-0.659124	RAB39A	Bos taurus RAB39A, member RAS oncogene family (RAB39A), mRNA [NM_001192830]	TTTGTTCCAAATACTGTGCATTCTTCTGAGGAAGCAGTAAAGCCCAGGAAAGAGTGCTTC///TTGAGGAATCCTTCACTATCTTGACAAGAGACATATATGAACTTATTAAAAGGGGAGAGA
A_73_104861	0.00409472	8.05508e-06	down	1.57982	-1.57982	-0.65976		Rep: HIV-1 Rev-binding protein-like protein (Rev/Rex activation domain- binding protein related) (RAB-R). - Canis familiaris, partial (55%) [TC420438]	TCCTTTCCCTGCCCCCCAAATCGCTGCACCAAAGCTGTTGCGGGCAATGTTGGGAAAGAA
A_73_P137541	0.0430949	0.00323339	down	1.58242	-1.58242	-0.662134		4105504 BARC 9BOV Bos taurus cDNA clone 9BOV30_E15 5', mRNA sequence [CK974779]	GGTTTGCAAAGTTTCATACTGGAGATTTCTCACGGGATGATGCTCCCACTTAAACTAGCT
A_73_P362021,A_73_P069611|506525	0.0433007	0.00325708	down	1.58432	-1.58432	-0.663867	RCOR1	REST corepressor 1 [Source:HGNC Symbol;Acc:HGNC:17441] [ENSBTAT00000003016]	TTATCGACGCCGCTTCAACATAGATGAAGTTTTACAAGAATGGGAGGCAGAGCATGGGAA///TCAACATAGATGAAGTTTTACAAGAATGGGAGGCAGAGCATGGGAAAGAAGAGAATGGTC
A_73_115988,A_73_109976,A_73_P088696|615718	0.011456	0.000219194	down	1.58455	-1.58455	-0.664072	FKBP14	Bos taurus FK506 binding protein 14, 22 kDa (FKBP14), mRNA [NM_001076391]///Rep: FK506 binding protein 14 - Bos Taurus, complete [TC442105]	TTGAAAAGCATGGTGCAGTGGTGAATGAAAGTCATCATGATGTTTTGGTAGAGGATATTT///TCGTAAGAATAATCAGACATGAGCTGTGACTCCACTTGTATATAATTTGCCTCAGTAATA///AGAAAAGAGAAAGCTCACCATTCCTCCTGCCTTGGGCTATGGAAAAGAAGGAAAAGTATT
A_73_P121226	0.0249118	0.00111824	down	1.58755	-1.58755	-0.666802		Rep: LOC783604 protein - Bos taurus (Bovine), partial (12%) [TC407813]	AACCCTCTAGAGTAAAATGGGAAGGATTCTTTCAATGCTATAGAAACAGTGTTCTACAGA
A_73_P036736|512545	0.0312041	0.00175978	down	1.58837	-1.58837	-0.667546	ITFG1	Bos taurus integrin alpha FG-GAP repeat containing 1 (ITFG1), mRNA [NM_001038532]	GCATCTAAGTTTATATGTCAGTGCTAATAACTTCCTAACATGCAAACGAACATATGATGG
A_73_115064|539547	0.0254635	0.00118193	down	1.58995	-1.58995	-0.66898	HES1	Bos taurus hes family bHLH transcription factor 1 (HES1), mRNA [NM_001034678]	CAAAGATGTTTGAAAATGCTCTTAAAATATCTTCCTTTTGGGAAGTTTATTTGAGAAAAT
A_73_104092|317710	0.00900926	0.00012903	down	1.58998	-1.58998	-0.669005	PLBD1	Bos taurus phospholipase B domain containing 1 (PLBD1), transcript variant a, mRNA [NM_001166298]	AATGGAGGGAGATAAGGGAATAGAAGGCTGCAAGGAAGATACCAAAGGCACTATTTTAGC
A_73_117585|280740	0.00542407	3.04809e-05	down	1.59161	-1.59161	-0.670485	CA2	Bos taurus carbonic anhydrase II (CA2), mRNA [NM_178572]	AATATAGGAAGGTAGGATGATTGAGTGCAAATCTATATACGAGGGTAGATTGAACTATGT
A_73_P036926,A_73_P106236|787995	0.033418	0.00201707	down	1.59167	-1.59167	-0.670541	VASN	Bos taurus vasorin (VASN), mRNA [NM_001083796]	GATCTTTTCCCATTTATTCTGGGAAAATGTTTTTCAAACTCAGAGACAAGGACTTTGGTT///TGATGTGTTCGACCGCCTCCTGGAGCTCAAGCTGCAGGATAACGAGTTGCGGGCACTGCC
A_73_P084251|784795	0.0439115	0.00333649	down	1.59408	-1.59408	-0.672721	CARM1	coactivator associated arginine methyltransferase 1 [Source:HGNC Symbol;Acc:HGNC:23393] [ENSBTAT00000015985]	TCTCAGGGACATGTCTGCTTATTGCCAACAAAAGACAGAGCTACGACATCAGTATTGTGG
A_73_116689,A_73_P064626|505542	0.0447928	0.00344271	down	1.59536	-1.59536	-0.673879	MSI2	Bos taurus musashi RNA binding protein 2 (MSI2), mRNA [NM_001206656]	CCCAAACAACCAGGTTAAGTAAAATGCTGGGCGCTTTAAAAATATAAAAACTTGTTCAAG///AATTAGAGAATGTATGGTCATGAGAGATCCCACTACGAAACGCTCCAGAGGCTTCGGTTT
A_73_P278983	0.0186893	0.000627415	down	1.59608	-1.59608	-0.674536		Rep: p300/CBP-associated factor - Mus musculus (Mouse), partial (8%) [TC421425]	TTTCTTGGGCCACAAAGGCATCCATTTGAAAACACTTGAGATTGAATTAACATGCTTTAA
A_73_P108131	0.0260152	0.00125204	down	1.59679	-1.59679	-0.675174		Rep: Xenopus laevis tandemly arranged embryonic U1 snRNA genes U1a/U1b - Xenopus laevis (African clawed frog), partial (28%) [TC482217]	TGTGGGAAACTCGACTGCATAATTTGTGGTAGTGGGGGACTGCGTTCGCGCTTTCCCCTG
A_73_100320,A_73_P273911|513265	0.0139492	0.000336657	down	1.59732	-1.59732	-0.675657	CDKN2AIP	Bos taurus CDKN2A interacting protein (CDKN2AIP), mRNA [NM_001046143]	TTATTCTGAAGTTGTTTGAAATTCACCATGATTTTGACCTCTGCAGATTCTTTAAGTGGG///TCTGAACCAGAAGTTCCAGATAAACATGGTTCGGCATCATTTTGTTCTTCATTGTTGAAA
A_73_P044261,A_73_111264|617293	0.00485439	1.7573e-05	down	1.59743	-1.59743	-0.675753	ELOVL5	Bos taurus ELOVL fatty acid elongase 5 (ELOVL5), mRNA [NM_001046597]	GCTGTCAAAGTGTGCTTAAGCTCATCTGGATATACCCACAATGTTAAATAATGTCTAAAA///CATTTCTTATAGCTCCGTTCAGAAAAATCAACAACCATGATTTATGAAACCTAACGTGTG
A_73_P380456,A_73_109763|614909	0.025114	0.00114177	down	1.5986	-1.5986	-0.676805	IRF8	Bos taurus interferon regulatory factor 8 (IRF8), mRNA [NM_001083769]	TTTCTGAACCGTATAAAGTTTACCGCATCGTCCCCGAGGAGGAGCAGAAATGCAAATTAG///TTCAGATGATGAAAACTTCCCTCTTGGGCCCTTGTTGCCAGGAAGCTTAGAGCTGAATTT
A_73_P080981|540234	0.0125431	0.000272914	down	1.59885	-1.59885	-0.677033	FAM46A	family with sequence similarity 46 member A [Source:HGNC Symbol;Acc:HGNC:18345] [ENSBTAT00000001319]	ACTTTAGCAATTACTACATTGCACAGGTCCAGCCAGTGTTCACATGCCAGCAACAGACAT
A_73_107200	0.012763	0.000283535	down	1.59923	-1.59923	-0.677381		Rep: Predicted protein - Coprinopsis cinerea okayama7#130, partial (3%) [TC407732]	TTCAACATACTTGTCTTTGGTAGAGCTTCTTTGCTGCCACCAAATTGGTAAGACGCTACC
A_73_P166327	0.0345618	0.00214741	down	1.60184	-1.60184	-0.679731		1360044 MARC 7BOV Bos taurus cDNA 5', mRNA sequence [DN532044]	AGAAGAACTACAAATTCATTGGAAGGGTGATAGGAAGGTTTTACGGAGAGGATGGGCTCC
A_73_109924	0.0348136	0.00217849	down	1.60291	-1.60291	-0.68069		Rep: Tissue factor pathway inhibitor 2 precursor - Bos taurus (Bovine), complete [TC422880]	TAGTACATTAATTATATCAGAAATGGTCTCCTCGGAGGGGGAAAATTCTCTCTGCTCATC
A_73_P098191|100296410	0.0298645	0.00160202	down	1.60335	-1.60335	-0.681091	LOC100296410	PREDICTED: Bos taurus uncharacterized LOC100296410 (LOC100296410), mRNA [XM_002699278]	GGACCAGAGTGAAGACCTCAGGTAGAACAAACAAAACTCCTGGCTATCCCAATTTGCATA
A_73_103517|510369	0.0443054	0.00337993	down	1.6042	-1.6042	-0.681851	LOC510369	PREDICTED: Bos taurus hypoxanthine phosphoribosyltransferase 1-like, transcript variant 2 (LOC510369), mRNA [XM_587503]	TCCTATGACTGTAGATTTCATCCGACTGAAGAGCTACTATAATGACCAGTCAACAGGCGA
A_73_P453846,A_73_110259|521378	0.00166106	5.06362e-07	down	1.6051	-1.6051	-0.682664	CITED2	Bos taurus Cbp/p300 interacting transactivator with Glu/Asp rich carboxy-terminal domain 2 (CITED2), mRNA [NM_001075819]	GTGGAATGTCGTCAGTGGCAAACATTTCACAGATTTTTATTTTGTTTCTGTCTTCAACAT///CCTCCCCCATATGTACAGACAATAATAGGGTGTGGAATGTCGTCAGTGGCAAACATTTCA
A_73_102837	0.0165408	0.000484695	down	1.60544	-1.60544	-0.682965		Rep: Predicted protein - Neurospora crassa, partial (9%) [TC415752]	GCCTTAAGCTACCAGATTGCTTTTGCCACCATTAGCCATATTGTGTGTTTGTACGTTTAA
A_73_P119166	0.0494555	0.00422699	down	1.60698	-1.60698	-0.684353		Rep: Membrane AAA-metalloprotease - Chlamydomonas reinhardtii, partial (10%) [TC418093]	TACAGTATTTGCACTAAAGAAAGCTTGTTAGAAAAAGCTTGCTGCTATGGAAGAAAGAAC
A_73_P122596,A_73_P060196|782347	0.0348136	0.00217958	down	1.60907	-1.60907	-0.686228	DNMBP	Bos taurus dynamin binding protein (DNMBP), mRNA [NM_001191163]	GCTTCTTTCCTGAAGCTCAATCAATAGCTGATAGACTTTCTTGGGAGAATGGAATCGGCG///TCAATGGGAAAAAGGGTTACGTTCCATCCAATTATATCCGCAAAGCCGAGTACACCTGAG
A_73_105479	0.0245842	0.00109043	down	1.61003	-1.61003	-0.687086		PREDICTED: Bos taurus transforming growth factor, beta receptor III (TGFBR3), mRNA [XM_001253071]	CTGTGGCCAGTTTGAGCACCCCTGTTGTACTCTTTTTCTCTGTTCAACGTGTCAACAATT
A_73_107300	0.0101818	0.000178859	down	1.61062	-1.61062	-0.687619		Rep: Protein ITFG3 - Bos taurus (Bovine), partial (41%) [TC410783]	TTCAGTGACTCGCGGGTCTGGGCACAAAGCAATGGGGCCATGTGGGGAATCCTACAAGAA
A_73_105452,A_73_P256711,A_73_P260021|512717	0.00921183	0.000147429	down	1.61501	-1.61501	-0.69154	RCN2	Bos taurus reticulocalbin 2 (RCN2), mRNA [NM_001075579]	TAATGTGTAACTATAGCATTATGGTGTGTGGAATTTGACTTTGTCCAGAACTCTTTTCTG///GAGCACAGGCTCCTTTTATAGTTTGTTACCAGCTTTACTTTTGTGATAAAATGTTGATGT///GACCGAAAGCTCTCTGAAGAAGAGATTCTGGAGAACCAGGACTTGTTTCTTACAAGTGAA
A_73_P074911	0.0158871	0.000441606	down	1.61719	-1.61719	-0.693493		Rep: Isoform 2 of Q8N131 - Homo sapiens (Human), partial (66%) [TC401849]	ATGGAAGGAAGAGCGATACAGCCCTATCAGCTCATTTTGATTTATTACTTTAATACAGTA
A_73_116898,A_73_P097011|534774	0.0477088	0.00392439	down	1.61794	-1.61794	-0.694157	BACE2	Bos taurus beta-site APP-cleaving enzyme 2 (BACE2), mRNA [NM_001206062]	ATAGCTTCCTCTTTCTCCCCTACTTCCAAGGAAAATGATAATAAAAAAGCACCTCATTCT///TGGATTGTCTCCTATACTCTCATGAGCGTGTGTGGAGTCATCCTTCTCGTTTTAATCACC
A_73_P250471	0.0313357	0.00177929	down	1.61909	-1.61909	-0.695186		Rep: T-complex protein 1 subunit theta - Bos taurus (Bovine), partial (51%) [TC461539]	CTGCAAAAAAGCTCCTCCTGACTTGGTATGTTGCTCTGCAAAAAATCTACGGGATGTTGA
A_73_P173622	0.0136814	0.000321664	down	1.62021	-1.62021	-0.696183		1Abo19A12 Bos taurus Abomasum #1 library Bos taurus cDNA, mRNA sequence [CB220230]	ATATTTTATGCTGGTTGTGTGCAAGCTTGTGCGATGTTATGTTCATGTTAATCCTATTTG
A_73_P347236,A_73_105908,A_73_P033431,A_73_P264131|282040	0.0379559	0.00255693	down	1.62254	-1.62254	-0.69825	RNPEP	Bos taurus arginyl aminopeptidase (RNPEP), mRNA [NM_001097563]	AGGTGCGGATCACCTACCGCGTCGGCGAGGGACCCGGGGTGTGCTGGCTGGCTCCGGAGC///GCTGATTCTTGAAATACTGTGCCAAGGGCTAATTTCTGGAGATTCTTTTTTCAGGTTTAA///ATCTCAAACGCCCAGAATGCAGAGCTGCGGCTGCGATGGGGCCAGATTGTCCTCAAGAAT///AGCTGAAGAAACAGAGGGTGGATTCCATCCCGGGACTGGAGTTTGATCGCTGGCTGGACA
A_73_P289321,A_73_108345|511682	0.007173	7.09188e-05	down	1.62298	-1.62298	-0.698641	MBTPS1	Bos taurus membrane bound transcription factor peptidase, site 1 (MBTPS1), mRNA [NM_001025330]	ATGGCATCGTGATAACACAGACATTTAAGGACCAAGGACTGGAGGTCTTGAAGCAGGAAA///TCAACTGCCATCATGTTTTGTAATTTGGGTCTTGATTTCACCATTGTCGGTGAAGAAAAT
A_73_P062811	0.00900926	0.000130481	down	1.62303	-1.62303	-0.698692		HW_Fat_67_050831_G01 Bos taurus CF-24-HW fat cDNA library Bos taurus cDNA, mRNA sequence [DV781041]	CCGCTGGACTTTATTATATCTCAAAAATAAGTCAATGAAAATGACTGATACCAGAAGCAG
A_73_P031071|614165	0.0245083	0.00108519	down	1.62327	-1.62327	-0.6989	SPTLC1	Bos taurus serine palmitoyltransferase long chain base subunit 1 (SPTLC1), mRNA [NM_001034749]	CACTGAATCTTAGCATCCCTAACCAGAGAACAGTCATTATACTTCCTAAGTGAGCAATAA
A_73_P292966,A_73_110423|281897	0.00542407	3.11329e-05	down	1.62328	-1.62328	-0.698911	LAMP1	Bos taurus lysosomal associated membrane protein 1 (LAMP1), mRNA [NM_001075124]	TTCGTGATGAACGAGAGCTCCAGCAGGGTGTTCCTTCAAGGAGTCCAGCTGAACCTGACC///TTTGTAAAGTGATTTTCCGTTTTCTGTTGGAGGTTTGGGGTGATGCTCTGTCCGCACCAT
A_73_P043016,A_73_P154497|519758	0.025966	0.00123978	down	1.62424	-1.62424	-0.699761	ATP1B1	Bos taurus ATPase Na+/K+ transporting subunit beta 1 (ATP1B1), mRNA [NM_001035334]///ATPase Na+/K+ transporting subunit beta 1 [Source:HGNC Symbol;Acc:HGNC:804] [ENSBTAT00000063162]	GAAGTACAGTGCTCTTGTTGATCTTGTATTCAGTCAGGTTAAAACAATGGACAATAAAAG///TTCAGTGCACTGGCAAGCGAGACGAAGATAAGGAGAAAGTTGGAAGCATAGAGTACTTTG
A_73_103570	0.0361048	0.00233372	down	1.6249	-1.6249	-0.700352		Rep: Insulin-like growth factor-binding protein 5 precursor (IGFBP-5) (IBP- 5) (IGF-binding protein 5). - Canis familiaris, complete [TC425856]	AGGAAACTGAGGACCTCGGAATCTCTGGCAAGGTCGCAACTTTGAAAACGGCAACAACAG
A_73_P179802	0.0354654	0.00224989	down	1.62507	-1.62507	-0.700499		Rep: VIP36-like protein precursor (Lectin, mannose-binding 2-like) (LMAN2- like protein). - Danio rerio, partial (5%) [TC478694]	GAGGTGAAATGAGGGGCTTTGACATTCAAATTATGTGATGTCATTTATCTTTCTTAGGAA
A_73_109267|525813	0.0159836	0.000453126	down	1.62524	-1.62524	-0.700654	ME3	Bos taurus malic enzyme 3 (ME3), mRNA [NM_001075877]	GACCATCTGATGCAACCTCAAAGGCTGGGATAGGGCTGGATGAAGCCCAGGGTAACACTG
A_73_116798,A_73_P193907|528057	0.0327127	0.00193461	down	1.62535	-1.62535	-0.700747	CSGALNACT1	Bos taurus chondroitin sulfate N-acetylgalactosaminyltransferase 1 (CSGALNACT1), mRNA [NM_001102116]	CAGTGACTTAATTGTTTTTTAAATTACGCTGTTCTACTCAGTCACCAAGATGCTTCTGAA///ATCCTAACCTTCTTTTCTTATGCTTCCAGATCCCCTCTGGAAGGTTACGATGGGAATGAG
A_73_P096646,A_73_100785,A_73_P150686|538532	0.00597956	4.53428e-05	down	1.62571	-1.62571	-0.701072	GOLIM4	Bos taurus golgi integral membrane protein 4 (GOLIM4), mRNA [NM_001205553]	CAACTTGTTCCTTCTCTGTCTTCCAGTTTCCAAGTGTTCTGCTGTCTGCCTTTGATGAAA///ATTGACCCTCATGACTTTTCTGTTTGCTGGGATTAGGTCTGCATTATATCCATGGATACA///GTTTGCTGGGATTAGGTCTGCATTATATCCATGGATACACGTTTAATGATGATGAATTAT
A_73_P039706,A_73_102465|281729	0.0444197	0.00339542	down	1.62645	-1.62645	-0.701727	SMC3	Bos taurus structural maintenance of chromosomes 3 (SMC3), mRNA [NM_174295]///structural maintenance of chromosomes 3 [Source:HGNC Symbol;Acc:HGNC:2468] [ENSBTAT00000046231]	GATGTGATCACAGCAGAGATGGCCAAAGACTTTGTAGAAGATGATACCACTCATGGTTAA///CCATTGGTCTGGAAGATGTGTAAAGTAATATGATCCTTTTACCCAGGAACTGTAAATTTA
A_73_P039726,A_73_P263591|516237	0.0493769	0.00420898	down	1.63357	-1.63357	-0.708026	MSLN	Bos taurus mesothelin (MSLN), mRNA [NM_001100374]	TTTTTACTTCGCAGAACATCAGTATAGACGCGGCGGCATTCAAGAAACTGACAACAGAGG///TGGCCTTCCAAAACGTCAGCGGGTCTGAATACTTCACAAGGATCAAGCCCTTCCTGGGTG
A_73_112929,A_73_P445611|511762	0.0199462	0.000706855	down	1.63384	-1.63384	-0.708269	ABCA7	Bos taurus ATP-binding cassette, sub-family A (ABC1), member 7 (ABCA7), mRNA [NM_001205705]	GACCAAAGCAGGGCAGAGGGGCTGAAGCTTGACCCAGACTCCAGAGGCCCTGGAGGAAAT///ACGATAGTGCCAATGTCGCCATGCTACAGAGGCTCCTGCAGATCCAGGACAAGGGAAGGA
A_73_P418376,A_73_P039346,A_73_P277121|540780	0.00409472	9.3251e-06	down	1.63511	-1.63511	-0.709386	CASC4	Bos taurus cancer susceptibility 4 (CASC4), mRNA [NM_001081737]	CAACCTTGAAATGAATTTTCAGTCAGTATTTCAAAGCTTCTCTGGTAGTTTTAGTGACCT///CCTGAATTCAGTGTTAATTTGATGGAAACTCTGCTTTTAAAATCATCACTTACTGGGTTC///TACCCCCTGTAACTCAGGTTCTAGTCAAAATTCAAACTTACAGAGGTTAAATAAAAAGGT
A_73_P122886	0.00733716	7.40831e-05	down	1.63641	-1.63641	-0.710533		1249890 MARC 7BOV Bos taurus cDNA 5', mRNA sequence [DN512999]	CCCATAAAAACAGAAACACTCTGAGTCTCTACTGTTTACCAACTGCAAAGTGAACAGCAA
A_73_116481	0.0341354	0.0020955	down	1.63764	-1.63764	-0.71162		GB	TGGCTGGGATCCTGTAACAGGCTGGGGAACACCCAACTTCCCAGCTTTGCTGAAGACTCT
A_73_P442006,A_73_P111796,A_73_P356646,A_73_106168|100125760	0.0129922	0.000290608	down	1.63868	-1.63868	-0.712533	DPP7	Bos taurus dipeptidyl peptidase 7 (DPP7), mRNA [NM_001105043]	TCACCGTGCTGGCCATGATGGACTACCCGTACGCCACTGACTTTGTGGGCCACCTTCCTG///TACAACTCCTCGGGCATAGAGCCCTGCTACGACATCTACCTGCAGTATCAGGCCTGTGCT///TACTTCGAGCAGCTTCTGGACCATTTCAACTTTGAGAGGTTTGGGAACAAGACCTTTCTC///AGGCCCTGGACACTGTGGCATGCTCACACCACCTCGTCAACGTGGCTGTTGAATAAAGCA
A_73_P289891,A_73_P104891,A_73_102723,A_73_P304396|532572	0.0348636	0.00218633	down	1.6426	-1.6426	-0.715982	LAMC1	Bos taurus laminin subunit gamma 1 (LAMC1), mRNA [NM_001206817]	TTTCTGGCAGTTGTTTAGACTGGCTGGATCATTTTGATCGGGAAGTGCGTGATTACTGAG///GCCTTCACTTGAGCTGTTTGCCTTAATCTCTACAGTCTTGCTCTCCAGGGTGGTAAAAAA///AAAGTCACACAGTTTTAAAGAGAAGCAAATTAAACATCGTGAATCAGGAACAAAGGGTTC///CCTATTGAACCAGGAAAAGTCACACAGTTTTAAAGAGAAGCAAATTAAACATCGTGAATC
A_73_100306	0.00485439	1.67928e-05	down	1.64267	-1.64267	-0.716046		Rep: Translationally-controlled tumor protein - Homo sapiens (Human), partial (80%) [TC423032]	TTGACAGACTGGCTCGCCCACCACCTGTTTTGTGGCTAAGGTGGTGCTTATATTTTTTAA
A_73_P273021	0.0334638	0.00202112	down	1.64434	-1.64434	-0.717513		Rho guanine nucleotide exchange factor 11 [Source:HGNC Symbol;Acc:HGNC:14580] [ENSBTAT00000016407]	TTCCAAGAAAGACAAGGATGCCTTGGAGGACAAGAAGCGAAACCCCATTCTCAAGTACAT
A_73_119787	0.0208853	0.000780842	down	1.64472	-1.64472	-0.717842		Hw_FAT_15_050513_B10 Bos taurus CF-24-HW fat cDNA library Bos taurus cDNA, mRNA sequence [DV780888]	AGTTCCTATAATAAAATAGAGGAAAGAAGCCGCTGTGAGGAGCTCGGCTCCTAACAGGAT
A_73_100082,A_73_P454551|281120	0.0202769	0.000727375	down	1.64541	-1.64541	-0.718445	DNTT	Bos taurus DNA nucleotidylexotransferase (DNTT), mRNA [NM_177495]	CTCATTTCCAGGGAAGTTCATCAAAGCCCACTTTGCCCACAGTGTAGCTGAAATACTGTA///AAATCTCTGCCATTCACAATCATCAGTATGAAGGATACAGAAGGAATTCCCTGCCTGGGG
A_73_P056961,A_73_116775|518609	0.0282156	0.00145262	down	1.64557	-1.64557	-0.718589	CD55	Bos taurus CD55 molecule (Cromer blood group) (CD55), mRNA [NM_001030303]	CTGAGAGTTCACAGAATTTGTCATCGCATTCGGATATATAATTCCTGGAAAAGAATATTG///TGATTTATGTGTTTATAAGCTGAAAGCTCATCTTATGCATGCATGAATTAGCCATGTGAC
A_73_112771	0.0265855	0.00130785	down	1.64715	-1.64715	-0.719969		Rep: PDE9A protein - Bos taurus (Bovine), partial (30%) [TC417363]	AAACAGGACTTCACAAGCTGTACAGAATTTTTATTTTTAAACTGTCTTTTAAATAATATA
A_73_115030,A_73_109834|615376	0.00905493	0.000139397	down	1.6489	-1.6489	-0.721501	EPDR1	Bos taurus ependymin related 1 (EPDR1), mRNA [NM_001102288]	CTATTGCCAGGAGAAATGTGTGACACCTATGTTATGCTGAAAACAATCTGTACTCACAGT///CCGTCACCAAAAATTACAGTGTGATATTGTCCACACGGTTTTTCGATATACAGCTGGGCA
A_73_P070906	0.0314658	0.00179727	down	1.64939	-1.64939	-0.721935		Rep: replication factor C 5 - Bos Taurus, partial (44%) [TC461106]	TATTGACCAAAATGGCAGACATTGAGTACAGACTTGCTGTTGGCACCAGTGAGAAGATTC
A_73_110501	0.00994426	0.000169897	down	1.65172	-1.65172	-0.72397		Rep: Septin-8. - Bos Taurus, partial (64%) [TC403124]	ATGAAGTCTTTTATGCGTGGAATTAACTGTAAAAAGAAAATAAAAGAGGCCAAAGCCCTC
A_73_105286,A_73_P252826|505537	0.033418	0.00201686	down	1.65349	-1.65349	-0.725514	RRM1	Bos taurus ribonucleotide reductase catalytic subunit M1 (RRM1), mRNA [NM_001113296]	TGTGAGAAGTGCTGATGGGGCCTTTATTGGGTGTGGTCTAAATAGGTCATTCTGAAATAA///GTGCATAGAAACAAAATGAGTCATAACCTGTGAGAAGTGCTGATGGGGCCTTTATTGGGT
A_73_105957	0.0195705	0.000680116	down	1.65664	-1.65664	-0.728256		Rep: Copper-translocating P-type ATPase - Clostridium thermocellum (strain ATCC 27405 / DSM 1237), partial (3%) [TC454625]	TGCAGAATGAATTGCATGTGCAAATCGTAACCACAGCTATTGTTTTTATGTTGACATAAC
A_73_P140281	0.0211969	0.000809316	down	1.65676	-1.65676	-0.728362		Hw_FAT_27_050803_D03 Bos taurus CF-24-HW fat cDNA library Bos taurus cDNA, mRNA sequence [DV775395]	AACTTGATAATACTTGATTTTAACCAAGGAGACTGGAGGCAAAGGGGACTAAGTGTTTAA
A_73_105082|540622	0.0293638	0.00154635	down	1.65676	-1.65676	-0.728365	CDCP1	CUB domain containing protein 1 [Source:HGNC Symbol;Acc:HGNC:24357] [ENSBTAT00000065511]	GATGCAGCGGAAGAAGTTTCAGAAGGGGCGCAAGGACAATGACTCGCACGTGTATGCCGT
A_73_106857,A_73_P106066,A_73_P316336|282331	0.0125557	0.000274624	down	1.66198	-1.66198	-0.732904	PTGER4	Bos taurus prostaglandin E receptor 4 (PTGER4), mRNA [NM_174589]	TTGAGCCTGATAGTAATGTGGTTTTAAGAAGCAGTTGTGCCAACTGAAATTATTTTGGAG///TATTGAGCGCTACCTGGCCATCAACCACGCCTACTTCTACAGCCACTACGTGGACAAGCG///TCAGGACAACCTAACGTGCTGATAAATATTTTGTACTTGTGTCTTCATTAGCTGGTACTT
A_73_105367	0.0168503	0.000504682	down	1.66204	-1.66204	-0.732952		Rep: Chromosome segregation ATPases-like protein - Victivallis vadensis ATCC BAA-548, partial (4%) [TC400631]	AAATCCCATATCTTACCTTATGGATAATTGTTGCACAGGCAGACACTGCTGTATTTAGAA
A_73_104342	0.0312831	0.00176901	down	1.66362	-1.66362	-0.734326		Rep: T-cell immunomodulatory protein precursor - Homo sapiens (Human), complete [TC412254]	GTTTACTGAGAATGGCGTGTGTATAAGTGGTTTACTTTATGTACCTAAGCATGGCTTTGT
A_73_P100596,A_73_100213,A_73_P102866,A_73_P177282,A_73_P258736|445417	0.00806579	9.97211e-05	down	1.66674	-1.66674	-0.737033	FZD1	Bos taurus frizzled class receptor 1 (FZD1), mRNA [NM_001101048]	TGAACAAGTTCGGCTTCCAGTGGCCCGACACGCTCAAGTGCGAGAAGTTCCCGGTGCACG///AAATGCCCGTACTTAGGACATAAATCTATCTATGTCTGTCATACCCTAAAATGACAATGC///GTAACGACAAGTTCGCGGAGGACGGGGCGCGCACCGTGGCACAGGGGACCAAGAAGGAGG///TTTGTGTGGGTTGGGAGAGACAATTCTAATTGCATACGAATACCTGGCAAACTGCCTCTT///TCACGTCAGGCTTCTGGATCTGGTCCGGCAAGACCCTCAACTCCTGGAGGAAGTTCTACA
A_73_P249371,A_73_P052036|538911	0.0417209	0.00303492	down	1.66973	-1.66973	-0.739614	HIST3H2A	Bos taurus histone cluster 3, H2a (HIST3H2A), mRNA [NM_001098097]	TTATTACCGGTGACAAGCTACTTTTGACTCCGGGAAGTCATTAGTGTGACATTCAGACGC///GCACTTACTTCATGGGGTTAAGGGATTAAATGAGTAAATCCATAGTAATCTCCATGTTTA
A_73_P082896|526092	0.0361048	0.00233521	down	1.67038	-1.67038	-0.740177	HS1BP3	Bos taurus HCLS1 binding protein 3 (HS1BP3), mRNA [NM_001046280]	TTTTAAGGGAACACAGGTTTTTAAGGAAATGCAACCATTGTCGTCCCTGGGGTTGTGCTG
A_73_P056836	0.00524479	2.36488e-05	down	1.67042	-1.67042	-0.740207		PREDICTED: Bos taurus melanoma antigen family B, 4-like (LOC100337211), miscRNA [XR_139746]	AAACCAGCAAGACAAAAATCCTGCAGTTTTTGGCCAAGGTCAAGGATTCAGTCCATCCTG
A_73_P164532	0.00843702	0.000111067	down	1.67077	-1.67077	-0.740509		Rep: PAOX protein - Bos taurus (Bovine), partial (12%) [TC462101]	TTTTAAAATAGTGCTTCTGAACATGGGGGCAATCTGGCAGTGTCTGGAGTCATTTTGGGT
A_73_110172	0.00921183	0.000147325	down	1.67118	-1.67118	-0.74087		PREDICTED: Bos taurus transmembrane protein 123 (TMEM123), transcript variant X1, mRNA [XM_010822736]	AGGACCAACTTTTGGTATTTCCTTGTTACTGAGATCTATTTTTAGAATAAAATTTTGTTC
A_73_P111981	0.0273077	0.00137356	down	1.67215	-1.67215	-0.741703		PREDICTED: Bos taurus ninein-like protein-like (LOC100297905), mRNA [XM_003585257]	TTGGAAGAAAAAGTTAGAGCTCTCAGCAAACTGCTCAGCAAGATTGCTACAGCATCCCTC
A_73_P082576	0.0273077	0.00137327	down	1.67357	-1.67357	-0.742931		pleckstrin and Sec7 domain containing 4 [Source:HGNC Symbol;Acc:HGNC:19096] [ENSBTAT00000025391]	ATCTCAGAGCGCAGAACCTACCGGAAGATCATCCCCAAACGGAACCGCAATCAACTGTGA
A_73_P069741,A_73_P069736,A_73_104314,A_73_P178302|618571	0.00900926	0.000133453	down	1.67489	-1.67489	-0.744066	HEXB	Bos taurus hexosaminidase subunit beta (HEXB), mRNA [NM_001076510]	AAGGAAGCTATTCTTTGTCTCATGTGTATACACCAAACGATGTCCATACAGTGATTGAAT///TCATGTGTATACACCAAACGATGTCCGTACAGTGATTGAATATGCCCGATTACGAGGGAT///TGCAGATGGTTTTGGATATGATTTCAACCGTGAAGAAGAGATCCATAGTCTGGCAAGAGG///AGCAATAAAGGAAGCTATTCTTTGTCTCATGTGTATACACCAAACGATGTCCATACAGTG
A_73_105422,A_73_P252311,A_73_P432631,A_73_P255276|508629	0.00307331	2.18499e-06	down	1.68201	-1.68201	-0.750188	ALDH2	Bos taurus aldehyde dehydrogenase 2 family (mitochondrial) (ALDH2), mRNA [NM_001075367]	GAAAAGCCATTGTTGACCGCTCTACTATCATTGAGGCAACAGCTAGCACCTTGCTTTGTA///AGCTAGGAGGAAAGAGTCCCAATATCATCATGTCAGATGCTGATATGGACTGGGCCGTGG///AGTAATGGAAGGCTCAGAGATCAGCCACAAGACCAAGAAAAATGACCCTTGCACGCTAAA///AAGAAGGTCCTTGGCTATATCAAATCTGGGAAGGAGGAGGGGGCGAAGCTGCTGTGTGGT
A_73_102508	0.0281098	0.00144068	down	1.68255	-1.68255	-0.750649		711707 MARC 6BOV Bos taurus cDNA 5', mRNA sequence [CB454881]	TCTAAATTATTCCCTGCTGCCAATTTCTAATGTAGACAAGAAATGAAACTAGAACTTCGG
A_73_110646|540647	0.0183142	0.000604356	down	1.68684	-1.68684	-0.754322	GPR19	Bos taurus G protein-coupled receptor 19 (GPR19), mRNA [NM_001101214]	TTAGTTGCTTTTTGTTTTAGAGGAAGCTTTTCACCTTGAGCTTATTTATGGTCAACAGTC
A_73_P115036	0.0336556	0.00203783	down	1.68751	-1.68751	-0.754898		GB	ATCAGCTTGGCCACACAGAACCAGGAGCTCCAAGCCCAGAATAAGCAACTTCAGCAGACC
A_73_106188,A_73_P288361,A_73_P090621,A_73_P334911|506574	0.0416274	0.00301852	down	1.68834	-1.68834	-0.755602	LRIG3	Bos taurus leucine rich repeats and immunoglobulin like domains 3 (LRIG3), mRNA [NM_001205591]	TTGATTTTCTGCTGGACAAGCAGTTCTTACAGAAAAGGCACTCTTCAGCTATCCAGCAAC///AGATCACGGTTCAGCCAGAAACGCAGTCGGCGATAAAAGGTTCCAATTTGAGTTTTATCT///CAAGTTCTAACATACTACCTCAAGTGGACTTTTATTTAAAAGAGAGAGAGAAGCCTATGT///TGGGTATTTTGACAATTTGGCTAGCACACTCCTGGTGTTGAAGCTGAACAGGAACCGAAT
A_73_P074776|533264	0.032051	0.00186256	down	1.68998	-1.68998	-0.757005	SULF2	Bos taurus sulfatase 2 (SULF2), mRNA [NM_001192938]	ATACAGGCAGTTTCAGCGTCGAAAGTGGCCAGAAATGAAGAGACCTTCTTCCAAATCACT
A_73_120096	0.0173462	0.00053077	down	1.69265	-1.69265	-0.759285		Rep: G1/S-specific cyclin-E2 - Bos taurus (Bovine), partial (9%) [TC432413]	ACTGCCTGAAATATTCCATTAGTATCCTTACTGTCAGTTTCAATGCCTTATCAAATAGAC
A_73_P076866,A_73_P148191|616239	0.030656	0.00169253	down	1.69575	-1.69575	-0.761921	TCN1	Bos taurus transcobalamin I (vitamin B12 binding protein, R binder family) (TCN1), mRNA [NM_001193105]	TACATCACCTCTGTTCAGGGCATAAAGGCCAGCAATAATGACAGAACCTACTGGAAGCTT///TATTTGACAACATTTCTCGGGGAGCATTTTACTTGCCGATTACTGCAGCCCAGATCTTAC
A_73_P477533,A_73_103743,A_73_P279846|785916	0.0308814	0.0017214	down	1.69888	-1.69888	-0.764586	PRRG1	Bos taurus proline rich and Gla domain 1 (PRRG1), mRNA [NM_001105640]	ATACATGCACTGATAGACAATGCATTATATCGGTCGGATTTCTGTGCCACTCCCACAGCT///CTCTTTTTCCTATTGACCAGTACAAATACAGATGCTGTGTTTGATTCACTGTTAATGATG///CTGGAATAGTGTCTATTTTTATGCTTTAGCCTTTCTTACCTGACTGATATTACATTCACC
A_73_P067751|531942	0.0272913	0.00136929	down	1.69995	-1.69995	-0.765492	BCL3	Bos taurus B-cell CLL/lymphoma 3 (BCL3), mRNA [NM_001205993]	AAGAAGCGGTGCTGCTCTTGTTGGAGCACGGCGCTGACATTGACGCGGTGGACATTAAGA
A_73_P033426|520564	0.0164216	0.000477448	down	1.70058	-1.70058	-0.766028	LITAF	Bos taurus lipopolysaccharide induced TNF factor (LITAF), mRNA [NM_001046252]	GCACAAGGAATGCATGTGAATAATACTGTGTAGAAATCAAAGCCTAGACATTGATCAAAA
A_73_121218,A_73_P049476,A_73_P113536,A_73_P331461,A_73_P098781,A_73_P289096,A_73_P513223,A_73_P297031,A_73_P103171|282066	0.00900926	0.000136427	down	1.70176	-1.70176	-0.767025	SELENOP	Bos taurus selenoprotein P (SELENOP), mRNA [NM_174459]///Rep: Selenoprotein P-like protein precursor - Bos taurus (Bovine), partial (35%) [TC423461]	TTTTTTATGGTCAATACTGTTAAGCAGAAATGTAGAACAGGACTGGCAAAAATGTGGATG///GTATTTCCATAGTCAATGATGGTTCAATAGGCAAACCAGGTCCTATAAACCTGAATTTTT///ATAAAGGATCAAGACCCTATGCTGAACTCCTACGGTTCAGTGACTGTGGTTGCTCTTCTT///TGGCAACTGAGAATGGAGGAAGAACACAAAGACATGTTCTCCACTTTCTTATTTCTCAAA///TTCATGAAAATGCTCATCTTTCAGAGTCTCCAAAACCAGACACACCAGATACCCCTGAGA///CGTAAACTATAACCTAAGGGTTTCTGTTGGATGGTTGGCAACTGAGAATGGAGGAAGAAC///TAAAAATGTATTTCTGGCTAC…
A_73_P260516,A_73_P119571,A_73_P033646|506714	0.00409472	5.91953e-06	down	1.70252	-1.70252	-0.767669	GINM1	Bos taurus glycoprotein integral membrane 1 (GINM1), mRNA [NM_001038509]///Hw_Fat_21_050801_G03 Bos taurus CF-24-HW fat cDNA library Bos taurus cDNA, mRNA sequence [DV779025]	GGAATGTGGAAACCACTGTAAATGAAGCTCTGCCTGGCAAATTACCTGAAACTCCTCTCA///GGACCCCATTTTCCCCCATTTAGGGAGTTCATATTTAAAATTTTTTCGGGGCCGGCCTTT///GACAGTTAAAGTTCACCTTATTCTATAATAAGGCTGCCTGTTCTGGTGGTGAATTAAAAA
A_73_P082856|785211	0.0463609	0.00366923	down	1.70356	-1.70356	-0.768551	WDCP	WD repeat and coiled coil containing [Source:HGNC Symbol;Acc:HGNC:26157] [ENSBTAT00000022591]	TCACAGCCACACAGGAAATAATCATAAGAGATGGCAGGTCAGATGACTTCCGAAACTCTG
A_73_102870	0.0472191	0.00384183	down	1.70565	-1.70565	-0.77032		4068319 BARC 10BOV Bos taurus cDNA clone 10BOV15_P08 5', mRNA sequence [CK944121]	GGAGTTTTCTAGGGTTTTAAATCATGCAAAATGTTTAGTCTGAGATTAGAGAAAATGGGG
A_73_104166|508124	0.0307899	0.00170357	down	1.70625	-1.70625	-0.770825	HOMER3	homer scaffolding protein 3 [Source:HGNC Symbol;Acc:HGNC:17514] [ENSBTAT00000001076]	ACTCAGTTTGCTGAGAAGTTCCAGGAAGTGAAGGAAGCAGCAAGGCTGGCACGGGAGAAA
A_73_P292736,A_73_117838,A_73_P267136|510524	0.00900926	0.000136798	down	1.7071	-1.7071	-0.771544	CTSH	Bos taurus cathepsin H (CTSH), mRNA [NM_001034385]	TATCTTTGGTCAGAGCCTCAGAATTGCTCAGCCACCAAAAGTAACTACCTTCGAGGTACT///AGAAGGGCTGCATTTCACATTGGGGAGAAGCTCCACTGTCTCTTCTGTGCTCTTTAATAA///TACTCCAGTACTTCCTGTCATAAGACTCCAGATAAAGTAAACCACGCAGTGCTGGCTGTT
A_73_P035236|518494	0.00547052	3.26878e-05	down	1.70759	-1.70759	-0.77196	GPS2	Bos taurus G protein pathway suppressor 2 (GPS2), mRNA [NM_001075774]	TTTTACATGAGGAAGAAAAACGGAGGCGAAAAGAGCAGAGTGACCTGACCACTCTGACAT
A_73_P251216,A_73_117697,A_73_P501873|531644	0.0318882	0.00183482	down	1.7103	-1.7103	-0.774254	C1GALT1C1	Bos taurus C1GALT1 specific chaperone 1 (C1GALT1C1), mRNA [NM_001034575]	ACAGGACGTGTATTGTTGTTATTTGTAGTAACAACTGCATATATATCCAACACAGCAGTA///AACATGTCTTTTTAGCTTGCTAAGATATGCAAATGAAATCTCTAATTTCGAATCTGTGAT///CGTACAGGACGTGTATTGTTGTTAATTGTAATAACAACTGCATATATATCCAACACAGCA
A_73_P103201,A_73_116323|281137	0.00572615	3.72918e-05	down	1.71249	-1.71249	-0.776095	EDN1	Bos taurus endothelin 1 (EDN1), mRNA [NM_181010]	TTTCGTGTTGCCAAGCTGAAAGCCCAGCTCTACAGAGATAAGAAAGTGATCTACAACCGT///TCAAACAGTTTATTCCTTATATTTACCATGTTAAATATGCGTTTGGGCAGGCCATATTGG
A_73_P090111	0.0435575	0.00329466	down	1.7138	-1.7138	-0.777198		homeobox C10 [Source:HGNC Symbol;Acc:HGNC:5122] [ENSBTAT00000004243]	AAGAAAATGAACCGAGAGAATCGGATCCGGGAACTGACCTCCAATTTTAATTTCACCTGA
A_73_101038,A_73_P101011,A_73_P049126|280795	0.0102333	0.000181324	down	1.71426	-1.71426	-0.77759	FOS	Bos taurus Fos proto-oncogene, AP-1 transcription factor subunit (FOS), mRNA [NM_182786]	CCTTGAGGTCTTTTGACATGTGGAAAGTGAACTTGAATGAAAAATTTAAGCATTGTTTGC///TTTGCAGACAGAGATTGCCAATCTGCTGAAGGAGAAGGAAAAACTCGAGTTCATCCTAGC///AGACCTAGGGAGGACCTTATCTGTGCGTGAAACACACCAGGCTGTGGGCCTCAAGGACTT
A_73_P265656,A_73_P040276|518515	0.0383762	0.00261174	down	1.71439	-1.71439	-0.777697	BTBD16	Bos taurus BTB domain containing 16 (BTBD16), mRNA [NM_001038131]	AGAACAAGACCATCCAAAGCAGAGAGGCAGATGTGATTCTCGAATGCCTTGGCTTCAAAT///TCAGAAGAATTTCTTCCACTGGTCCACATAAGAAGAAATAAAATAACATGAAAGGGACTG
A_73_103552,A_73_P068931|522442	0.0255619	0.00119838	down	1.71501	-1.71501	-0.77822	FANCI	Bos taurus Fanconi anemia, complementation group I (FANCI), mRNA [NM_001191454]	AGACTTTAAGCTTTCTAATTTGTTTGGCATTCAGAGCATAATTTTGTCACCTAAGAACCC///TCTGGTAAATATCCAGCGCTTCACCTGAAAAATAGTGCAATTCGTTAGGATGCCCCCTCA
A_73_P299151,A_73_100255,A_73_P105101,A_73_112325|280851	0.0472191	0.00384331	down	1.7156	-1.7156	-0.778716	CD46	Bos taurus CD46 molecule, complement regulatory protein (CD46), transcript variant 4, mRNA [NM_001242561]///Bos taurus CD46 molecule, complement regulatory protein (CD46), transcript variant 2, mRNA [NM_183080]///Bos taurus CD46 molecule (CD46), transcript variant 5, mRNA [NM_001242565]	ATAAGTCATGTAAAGAAAGACGTGTACTGTCTGATCTCACTTACACATGGAATCGAAAAA///AAAGGGAAAGCAGAATGTAGCGCTACGTACACCACTTATCAGGATAAAGCAACCACTGCA///CTAAAAGTTGCTGAGAGGGTAAGATTTACAAGGAACCTCATGAACTTTGTCTTTTTATCT///AAACTGCAAGAGTGAATCCCCAGTGGAATGAGACGTCTCATGTCTGTATTGTTTTCTGAG
A_73_P419061,A_73_P326461,A_73_P113426|506787	0.0109499	0.00020195	down	1.71709	-1.71709	-0.779965	PDE8A	Bos taurus phosphodiesterase 8A (PDE8A), mRNA [NM_001191455]	AAGATCAAGAAGCCATAAATACCATGCTCAGGGCTCCAGAGAACCGGACTCTGATCAAAA///ATACTTCAAAGCCAAAGCCAACTTTAGATGCCATGACCAAATTTACATGATTCATAGTCA///GTTAATGCAGCATCTCGACAACAACTTTAAATACTGGAAAGGACTGGACGACATGAAGCT
A_73_P046146,A_73_P104176,A_73_P113266|404118	0.00969218	0.000161612	down	1.71761	-1.71761	-0.780401	CEACAM1	Bos taurus carcinoembryonic antigen related cell adhesion molecule 1 (CEACAM1), mRNA [NM_205788]///carcinoembryonic antigen-related cell adhesion molecule 1 precursor [Source:RefSeq peptide;Acc:NP_991357] [ENSBTAT00000007371]	TCAGCCTCCCCATCTCCAACAAATACAGAAACAATTTATTCAGAAGTGAAAAAACAGTAA///CTAGAAGTAACTAGAAAACAACTTCTCAGTGTTCATAAGTGTATCTTGATGGAAACTGCA///AGGACAAAAGGACTCTCACTGTGTTCAATGTGACAAGGAATGACACAGGACCCTATGTGT
A_73_112783	0.00485439	1.73875e-05	down	1.72491	-1.72491	-0.786523		Rep: Homer protein homolog 1 - Bos taurus (Bovine), complete [TC392383]	GACTGGAAGTGACGCAGGGAGGGAGAGCAGAGATTGATCCCATTGTGTATAAGTTATTAT
A_73_P038261,A_73_P325651|538348	0.0156025	0.000419745	down	1.72526	-1.72526	-0.78681	EHD2	Bos taurus EH domain containing 2 (EHD2), mRNA [NM_001046431]	TAAAACAGACACATTTATCTGCTGCTCTCATGGAGCTGACATTCTCAGGAGAGAGCATGC///GGACTGCCAGAAGATGCAGGAGCTGCTGATGGCTCATGACTTCACCAAGTTCCACTCGTT
A_73_113489,A_73_P073441|783681	0.0468745	0.00377914	down	1.72774	-1.72774	-0.788886	JAG1	Bos taurus jagged 1 (JAG1), mRNA [NM_001191178]	AAAGTCATATTTATTAAATTTTTTGTACGAAAACATGGACCAGTGTGGCCTCTTCTGAGC///AAGGACTACGAGAGCAAGAACTCCAAAATGTCCAAAATAAGGACACACAACTCGGAGGTG
A_73_P325841,A_73_102541,A_73_P164352|538365	0.0400411	0.00281965	down	1.7287	-1.7287	-0.789685	SLC35F3	Bos taurus solute carrier family 35 member F3 (SLC35F3), mRNA [NM_001192935]	AGGTGACATTATAAGTCACTGGCGCCGTCTTATCATTTAGATGTAGAAATCTTTAGAAAC///TCTTGGAATCGTCCTCAGCGTACCTGTGAATGCAGTGGTTGATCATTACACCAGTAAGAT///CTAGGGGAAAGGAGTACTCATGACCTAAACTTTTTAGCAAATTATTATTCTCAGTTTCCA
A_73_118010|378475	0.0470844	0.00381978	down	1.73013	-1.73013	-0.790881	IL21	Bos taurus interleukin 21 (IL21), mRNA [NM_198832]	GAAAAAACCACCCAAGGAATACCTAGAAAGACTGAAATCACTCATCCAAAAGATGATTCA
A_73_P130871	0.0256508	0.00121625	down	1.7316	-1.7316	-0.792106		bemiv_0B01-002-d06 Metaphase II stage oocyte bemiv Bos taurus cDNA 3', mRNA sequence [CK726817]	CAAAGGAAACACGATATGTGAAGTTTCAGATGTCAAATAAATATGTTAGCTATCATCCCG
A_73_119583	0.00307331	2.35429e-06	down	1.73385	-1.73385	-0.793977			GGAAATGCCTCAGGATATTCCCTCTTTTCACTGGGGATTCACTTGCCTGTTTGCACATTA
A_73_P081111|100139498	0.0369897	0.00243281	down	1.73628	-1.73628	-0.795997	MCM9	minichromosome maintenance 9 homologous recombination repair factor [Source:HGNC Symbol;Acc:HGNC:21484] [ENSBTAT00000002665]	TCACTTTACCAGAACTAGATGATGAACCATTAGATTTTGATTGGGATGAGGAAATGAGAA
A_73_113398,A_73_P400166|532015	0.00502024	1.93211e-05	down	1.73778	-1.73778	-0.797247	ELOVL4	Bos taurus ELOVL fatty acid elongase 4 (ELOVL4), mRNA [NM_001099050]	TTGTTTTGATTTGTGGCTGTTACCGATTTTTCATATGTGGAAATACACCTACCTCTTCTG///ATTATGTATTCATACTATGGGTTAGCTGCCTTCGGCCCGTGGATTCAGAAATATCTCTGG
A_73_P096641|532209	0.00542407	3.01035e-05	down	1.73953	-1.73953	-0.798695	MECOM	MDS1 and EVI1 complex locus [Source:HGNC Symbol;Acc:HGNC:3498] [ENSBTAT00000007717]	ATGCCTTAGAAACCTGAAGGGTCACTCATGTAAAGTCTGGGGACCTTAAACGGAAGGATT
A_73_P120306	0.0130195	0.000292433	down	1.74113	-1.74113	-0.800023		Hw_loin_32_050705_G03 Bos taurus CF-24-HW loin cDNA library Bos taurus cDNA, mRNA sequence [DV794251]	CCTGCAAGTGAAACTGTATAGAGTTTATAAAATGACTACGGATAGGGGACTGTTTTCACT
A_73_109716	0.0188986	0.000638202	down	1.74298	-1.74298	-0.801558			CATATTAAAAGCCACAACATGTTATAAGCTGAGATCTCAGGTCAAATGGTGCCTCTCAAC
A_73_112437	0.0315174	0.0018083	down	1.74348	-1.74348	-0.801972		Wnt family member 7B [Source:HGNC Symbol;Acc:HGNC:12787] [ENSBTAT00000012540]	CTTCCTGCGCATCAAGCAGCTGCGCAGCTACCAGAAGCCCATGGAGACGGACCTGGTGTA
A_73_120999|508367	0.048927	0.00412675	down	1.74428	-1.74428	-0.802634	MAP3K14	Bos taurus mitogen-activated protein kinase kinase kinase 14 (MAP3K14), mRNA [NM_001192178]	AAAGTCCAAATACAGTCTCTCAATGGCGAACACCTGCACATCCGGGAGTTCCACCGGGTC
A_73_P259251,A_73_113603,A_73_P276156|512444	0.0498686	0.00427749	down	1.7447	-1.7447	-0.80298	GNS	Bos taurus glucosamine (N-acetyl)-6-sulfatase (GNS), mRNA [NM_001075562]	TGATGCTGCTTCCTAAAAGCAGATGAGGTCATGAGAGTAACTCAGATCCACTAACTGCTC///GTCATGAGAGTAACTCAGATCAACTACCTGCTCTTACATGCAGATTTTGGGTTGGGTTGG///ACACCAGGGCTATTGAGGGAATGTCTCCCCTCTAAGATCTGAAAAAGTGGGTTAAGTATT
A_73_112593	0.00994426	0.000170826	down	1.75046	-1.75046	-0.80773		Rep: SJCHGC07445 protein - Schistosoma japonicum (Blood fluke), partial (20%) [TC434216]	ACTAACTTGTTGAATTCATGATCTCCTGCCTTAAGGCACCAATTGTAAACCTTCGTTTTT
A_73_117791	0.0227689	0.000940637	down	1.75123	-1.75123	-0.808367		Rep: Peroxidasin homolog - Homo sapiens (Human), partial (96%) [TC403550]	AGCAGACCACGGGGCAGACGCGTGCCTGACTCCATGTTAAGGCTTCTCAGGGTTCTATTT
A_73_109524	0.0327519	0.00193943	down	1.75525	-1.75525	-0.811673		Rep: Aspartyl/asparaginyl beta-hydroxylase - Bos taurus (Bovine), partial (10%) [TC426033]	TGATGGATGAGCCTTGTCTTTACAAATATATGCCAAGCTGGGAAACATCAATGGATTTTC
A_73_120625,A_73_P093426|520518	0.0208395	0.000774245	down	1.75621	-1.75621	-0.812466	LOC520518	PREDICTED: Bos taurus Sel1 repeat containing 1 (SELRC1), mRNA [XM_598765]///cytochrome c oxidase assembly factor 7 (putative) [Source:HGNC Symbol;Acc:HGNC:25716] [ENSBTAT00000002656]	TTAAATAGTCAGGACTGCCACCTGCTGACTTATGCAGTCATTGGTGTGGGCTGCTTTTTT///CTCCCCAGTGTCACCTGCTCAGATGTAGTCTAAAATGTTTATTTTGGTCAATATTTGTTT
A_73_111620	0.0155069	0.000415125	down	1.76361	-1.76361	-0.818535		Rep: NADH-ubiquinone oxidoreductase chain 2 - Channa lucius, partial (5%) [TC446649]	AAAGGAACCTGGTTGAAGTGCTATTATGTAGTGTGGGCTACAGAAAAGAAGCTTTTCCTA
A_73_105222	0.0379604	0.0025603	down	1.76602	-1.76602	-0.820505		Rep: Nucleolar complex protein 2 homolog - Arabidopsis thaliana (Mouse-ear cress), partial (3%) [TC425340]	TTAAGCAGCTGGCACTTTCTTTTAACTCAATCCAGCTGGCTCTCTGCAACCGAATTTCTT
A_73_P110396,A_73_100633|509326	0.0487586	0.00408567	down	1.76763	-1.76763	-0.821819	TBXAS1	Bos taurus thromboxane A synthase 1 (TBXAS1), mRNA [NM_001046027]	CGAAGCAGTTGAAAGCATGCCAGGCCTATGAATATAAAAGTGGTCATTTATGTAACATTT///AGGAAATCCTTGTGTGGAAATGTGGATTTTTGTTAAAACACCACCGAAGCAGTTGAAAGC
A_73_102711|507031	0.0227689	0.000942233	down	1.77046	-1.77046	-0.824128	STX7	Bos taurus syntaxin 7 (STX7), mRNA [NM_001077864]	TTTGATAGTGAAGGCAATGTTTTACATGGCAAGCTATGAGACTTCAGATGGGAACAAATA
A_73_P052236,A_73_114795|510305	0.0390279	0.00268286	down	1.77759	-1.77759	-0.829926	TMEM45B	Bos taurus transmembrane protein 45B (TMEM45B), mRNA [NM_001034375]	TGTGAATCTTGAATGAGTAACAAACTCTGGATATGCAAGTCTTAGTTCTGGATCTTTTGT///CAGTCACGACAACATCATGTTCGTCACCATGTGCTTCTGCTGGCACTACCTGGCCGCACT
A_73_P256911,A_73_P032626|280746	0.00900926	0.00013421	down	1.77909	-1.77909	-0.831141	CD9	Bos taurus CD9 molecule (CD9), mRNA [NM_173900]	AAAGAATTTAATTGACAGCTTGAAAACGAGGCCCTGCCCTGAAGCCATCGACGAGATCTT///CTGCAATGAAAGGTACTATGTTTGCTAAACTCTAGACAAAAGATATTGTACATAGCGAGA
A_73_P079736,A_73_113544,A_73_P413916,A_73_P109151,A_73_P250641,A_73_P109141|281530	0.00485439	1.66604e-05	down	1.78397	-1.78397	-0.835095	THBS1	Bos taurus thrombospondin 1 (THBS1), mRNA [NM_174196]	AAAGTGTCCTGTCCCATCATGCCCTGCTCCAATGCCACAGTTCCGGATGGAGAATGCTGC///ACCTCATTTGTTGTGTGACTGAGTAAAGAATTTTGGGATCAAACAGAAAGAGTTTAAGTG///AGACTGATCATAACCAATGCTGGTATTGCACCTTCTGGAACCATGGGCTTTAGAAAACCC///AGAATGTAAGGTTTGTCTTTGGAACCACACCAGAAGACATCCTCAGGAACAAAGGCTGCT///GTTGTCCATTTGCAAGTGTTTTTAGTTTGCAAAGAAAGCCAAGAGGCCATTAATACTGTC///AATGACTTTGGTTGGCTTTTGCAAAAGCAAAAGCATCCACATGCTTTGGTTGGAAGGTGC
A_73_P252741,A_73_P281196,A_73_P252411,A_73_101838,A_73_P441506|527592	0.00683143	6.33565e-05	down	1.78965	-1.78965	-0.83968	HSD17B11	Bos taurus hydroxysteroid 17-beta dehydrogenase 11 (HSD17B11), mRNA [NM_001046286]	TGATCTTTGTTCCATCTTCTCTCAACTTTTTGTCATTGATGGAAAACGTCCTTCCTGAGC///CCTGAGCGTTTCCAGGCAATTTTAAAACGAAAGATTGATATTAGGTTTGATGCAGTTATT///GAAAGACTGTATCTAGTGGCATTTCATAATGAATTTCATGTGATGTAAGAAATACTGCCC///GCATCATTGGGATTTGAGACAAAGAACTGGGAAAATGTACCCATAAGTGGCAGCAATAAT///TCTTCCTGAGATGATGAAGAATAATCATGGCCATATTGTCACTGTGGCTTCAGCAGCTGG
A_73_P069406	0.00857039	0.000114629	down	1.79189	-1.79189	-0.84148		monooxygenase DBH like 1 [Source:HGNC Symbol;Acc:HGNC:21063] [ENSBTAT00000025923]	TGTCTCTCATACATTCTTTATTACCCAAGAATTAATCTTACTCGATGTGCAAGTATCCCA
A_73_116921	0.00777191	9.05662e-05	down	1.79382	-1.79382	-0.843038		Hw_Fat_56_050802_B06 Bos taurus CF-24-HW fat cDNA library Bos taurus cDNA, mRNA sequence [DV777590]	TTACTATTTGCTAGTTTGTCTCAGGCCTCAGTGTTGGAGGGCCCTAGGCCTTTTATGTTT
A_73_P134586	0.00563148	3.54073e-05	down	1.79457	-1.79457	-0.843639		Rep: Uncharacterized protein ENSP00000380380 - Homo sapiens (Human), partial (35%) [TC477439]	ATTTGATAACAGGCTGTACCGCCAGACTTCAAGCACACTGAAAACTCTGTGTCAGCCTTT
A_73_P041081,A_73_P260691|327711	0.0181089	0.000586963	down	1.79599	-1.79599	-0.844778	CTSS	Bos taurus cathepsin S (CTSS), mRNA [NM_001033615]	CAGTGATGTCAAAGAAGACAAATGCTAAGGAGACAATCTATTTTCAAGCACTTTGTAAGA///TCTCTTATTTGTCCTTTTAAGTTCCCTAATATGCTGCTGAAACTTGATGGCATATAGATG
A_73_101211	0.014715	0.000372879	down	1.79616	-1.79616	-0.844912			TATATACATGTTGAAGAAAGCATCACAGCAGAACTGTAGGAGTCCAAATTTAATGAACTG
A_73_P143436	0.0208132	0.000771228	down	1.79693	-1.79693	-0.845534			GTACAGGGTGGCCACCAAATCTGGAAACAACAACAATAAAAAACCATACACGACGAAAAA
A_73_114663	0.0287368	0.00149504	down	1.79737	-1.79737	-0.845886		Rep: Proprotein convertase subtilisin/kexin type 6 precursor - Homo sapiens (Human), partial (19%) [TC432414]	AAACCAGAAAGAATAAAGAAGCCAAAAACATAATATTAAAAGCAATTCTACAAACCCAAA
A_73_P468273,A_73_P189132,A_73_P046446|526888	0.0265855	0.00130511	down	1.79924	-1.79924	-0.847385	EPM2A	Bos taurus EPM2A, laforin glucan phosphatase (EPM2A), mRNA [NM_001099709]	TCTCTGTTATAGAGATGAGGAAACTAAGATTCACAGAGATGAAATCAACTGTCCTCAGTC///AATTTCCAGACGGAATGGGATATTGTACAGAATTCCTCAGGCTGTAACCGCTACCCAGAA///CCATCCTCAATGAATGGGATGTCCAATGTATTTAAAAATCACCTGGAACTTTTGCTAAAT
A_73_111154,A_73_P038551,A_73_P259551|407125	0.0223024	0.000898952	down	1.80698	-1.80698	-0.853584	EGR1	early growth response 1 [Source:HGNC Symbol;Acc:HGNC:3238] [ENSBTAT00000013284]///Bos taurus early growth response 1 (EGR1), mRNA [NM_001045875]	AAACAAAGTGACTGTTTGGCTTATAAACACATTGAATGCGCTTTATTGCCCATGGGATAT///TATGCCTGACCCCTTGCTCCCTTCAATGCTAGAAAATCAAGTTGGCAAAAATGGGGTTTG///TCTGAATAACGAGAAGGTTCTAGTGGAGACGAGTTACCCCAGCCAAACCACCCGGCTGCC
A_73_P494174	0.0496016	0.00424719	down	1.80818	-1.80818	-0.854538			CCTGTTTCCCCTGGAAATTTCCTTCTAACTAGAAATTTGAGCTGCTATAAGAGATATTTA
A_73_P296151,A_73_P044566|100124520	0.0339872	0.00206697	down	1.81287	-1.81287	-0.858276	GNAL	Bos taurus G protein subunit alpha L (GNAL), mRNA [NM_001102554]	GGTGTATGTAGAGTTTAGGGGTTTATTAGGCTGGTACTCTTGATAATACTCATTGATCAA///CAGGCATTCAATTCAGATTTAACAGCTTGGAGAGGAAATTACACTCATCTAAAAATCTGA
A_73_P368376	0.00166106	4.78442e-07	down	1.81498	-1.81498	-0.85995		PREDICTED: Bos taurus midline 1 (MID1), transcript variant X2, mRNA [XM_005228477]	CTGGACAAGTGTCACAAAGATGCGGATGTGATTTGCTTGGTCGGGAAATGAAAGTCTGTA
A_73_P098791,A_73_P190882,A_73_115070|282879	0.0200751	0.000713715	down	1.81671	-1.81671	-0.861326	HGF	Bos taurus hepatocyte growth factor (HGF), mRNA [NM_001031751]	TGTGACATTCCTCAGTGTTCAGAAGTTGAATGCATGACCTGCAATGGGGAAAGTTACCGA///GGACTTCCATTCACTTGCAAGGCCTTTGTTTTTGATAAAGCAAGAAAACGATGCCTCTGG///CGTATAAGGCACCACAGTTGTAGCTGGTATAACTGTCTGAAGCTTCCAATAACACAAGTC
A_73_P168972	0.0357732	0.00229075	down	1.82153	-1.82153	-0.86515		UMC-bemiv_0A01-022-d03 Nuclear-transfer derived blastocysts D8 bemiv Bos taurus cDNA 3', mRNA sequence [DN639527]	AGTGCATAAGGTCACAAAGAATCGGACATAACTGAGCGACCAACACAACAACAACAACAA
A_73_107006|404164	0.0159836	0.000453	down	1.82174	-1.82174	-0.865318	ST3GAL5	Bos taurus ST3 beta-galactoside alpha-2,3-sialyltransferase 5 (ST3GAL5), mRNA [NM_205807]	TGCCATGAACTTTCAGACCATGCACAATGTGACCACAGAGACCAATTTCCTTCTGAAGCT
A_73_P206197,A_73_P192922,A_73_P049696,A_73_P491048,A_73_P391946|510559	0.0467473	0.00373377	down	1.82194	-1.82194	-0.865476	LTBP1	Bos taurus latent transforming growth factor beta binding protein 1 (LTBP1), mRNA [NM_001103091]///latent-transforming growth factor beta-binding protein 1 precursor [Source:RefSeq peptide;Acc:NP_001096561] [ENSBTAT00000026435]	AGCTACAGATGTACCTGCAAAGTGGGATTTGGGCCAGATCCTACCTTTTCAAGTTGTGTT///AAGAAACCGATGTCTACCAAGATCTGTGCTGGGAACATCTGAGTGACGAGTATGTGTGTA///GGAGTAAGAGAGAAGCTAACATAACCTAAGCCTGTATACTCTGCACTGTGTAAAGGAGAA///AGATCCATTCTCAGATGACACCCCTGTCTTCACAGAATGTGATGATACATCATGGCCAGA///CTAAACACAGACAGTTCTTTTCACTGCATCTGCGAACAGGGTTTCTCAATCTCTGCAGAT
A_73_P061701	0.0260812	0.00126217	down	1.82508	-1.82508	-0.86796		oral cancer overexpressed 1 [Source:HGNC Symbol;Acc:HGNC:17589] [ENSBTAT00000015782]	TTAAGTGTTGAAAAACGTGATTAAAAGCAAGACAGTGGGGAGGATCCATCGTTTTGCAGG
A_73_P033536|281154	0.0180169	0.000577192	down	1.83459	-1.83459	-0.875455	FBN1	Bos taurus fibrillin 1 (FBN1), mRNA [NM_174053]	GAACTGAATTTTTCCCCCAATCAGAATCTTCATATTATAGGTACAGTCTTTCACCACGTA
A_73_105425	0.0295829	0.00157287	down	1.84456	-1.84456	-0.883279			TCAGAAAAGTTTAGAAAACATCATCATTAAAGAATGGTAGAGTGAAACGTCTCCCTCTTC
A_73_P304656,A_73_102753|510906	0.00628163	5.14632e-05	down	1.84553	-1.84553	-0.884034	DDIT4L	Bos taurus DNA damage inducible transcript 4 like (DDIT4L), mRNA [NM_001081519]	CTAAAAGGGAAGCTCTTGAAAGAGTCCTTTTTATGGTTGGGTAATAAAAACTTCACAGCC///TGTCTTTGACTCTCTTGTCTTTTATACTCACAAAATAGTGATGGCTTTATAGAGACCCTT
A_73_107096,A_73_P251406|281194	0.0096227	0.000157671	down	1.84577	-1.84577	-0.884226	GJB1	Bos taurus gap junction protein beta 1 (GJB1), mRNA [NM_174069]	CCTTTGCCTCTAGTCCCCAAGGCCTCTCTGCCTGAAATGTTACACATTAAACAGGATTTT///TATGTGATCAGCGTGGTCTTCCGGCTGTTGTTCGAGGCTGCTTTCATGTATGTCTTTTAT
A_73_105695	0.0343543	0.00211289	down	1.8483	-1.8483	-0.8862		Rep: Os09g0450600 protein - Oryza sativa subsp. japonica (Rice), partial (5%) [TC480150]	AATGGAGACAGTGCTGTGCTTTGGGTTCAGGGATGTACAACAAATCCCAGCCAATCATTT
A_73_112232	0.0156577	0.000424214	down	1.85843	-1.85843	-0.894083		Rep: Adenylosuccinate synthetase - Bos taurus (Bovine), complete [TC443494]	CAGAACCTGCAGAGACCCTACTGAGGTCCGTGCTCAACTGGAAGCCGTACTTGGCTCATT
A_73_P080406	0.0263758	0.00128145	down	1.86557	-1.86557	-0.899619		gephyrin [Source:HGNC Symbol;Acc:HGNC:15465] [ENSBTAT00000005465]	AGATAGTTCTTCATCACATATAACTGCAGCAGCCATTGCGGCCAAGAAGCATCCATTCTA
A_73_P481493,A_73_119748|506059	0.00755435	8.26452e-05	down	1.87005	-1.87005	-0.903075	ACSL6	Bos taurus acyl-CoA synthetase long-chain family member 6 (ACSL6), mRNA [NM_001038042]	GGACAATGTAGCAATATTATAGTTGTTCTTGAAAGTAACAAGTCAGAATGATGCAGCTGA///TATGACTGAGCCTTTTCCTGTCTCTAGAGGTCTTTAACAATATTTTCTCTCTCATCACTG
A_73_101307	0.00887382	0.000122825	down	1.8708	-1.8708	-0.903654			GTTCTCCCAGTTTATTATGCCATCGGATGGTAAATGAGAACACTACAACTGTAGTTAGCT
A_73_117703,A_73_P032426|281909	0.0165915	0.000489976	down	1.87432	-1.87432	-0.906366	MANBA	Bos taurus mannosidase beta (MANBA), mRNA [NM_174387]	TTGCATGTGATGAGCCTGGCAGCAAAGTGGTATTGCCTTTAACTTGAGATTGAACCATTT///GGAAAGTTTGGTGGGATTGATTATTGCCATTCGATTACTTTTTGAGTAGGAGTCTTTTTT
A_73_111290	0.00736084	7.47826e-05	down	1.87504	-1.87504	-0.906918		PREDICTED: Bos taurus CD59 molecule (CD59), transcript variant X2, mRNA [XM_015474849]	TGTATGCTTAGAATCTTGGCTGTATGTAACAGCGTAGCCTGACTTTCACAGACAAAGGTG
A_73_103013|618412	0.00592931	3.99912e-05	down	1.87802	-1.87802	-0.909212	DUSP15	dual specificity phosphatase 15 [Source:HGNC Symbol;Acc:HGNC:16236] [ENSBTAT00000011856]	ACTGTTGCCGCCTCAATGGGGGAAACTGCCTTGTACACTGCTTTGCAGGCATCTCCCGAA
A_73_P164942	0.0194394	0.000668154	down	1.87919	-1.87919	-0.91011		LB0163.CR_K10 GC_BGC-16 Bos taurus cDNA clone IMAGE:8120292, mRNA sequence [DT809455]	GAAAAGATGCTGACTGGGTGGACTCTTTACAAATCACAAAGTGTCTTGCATCTAGGTTCA
A_73_P105926,A_73_P048631|614940	0.0486975	0.00407135	down	1.88748	-1.88748	-0.916461	PRSS35	Bos taurus protease, serine, 35 (PRSS35), mRNA [NM_001035457]	CTATGCTATCCCTCTTTGTTAATATTGTGTTTTCCATTGGGTCTAAGAAGCTTTTAGGTT///GATACATACTCTTCTTTTGGAATAAACCCAAGTCATTGATTCTGCCTGAGTTCAAAGTTA
A_73_P512074	0.020613	0.000756404	down	1.8918	-1.8918	-0.919762		Rep: PAOX protein - Bos taurus (Bovine), partial (7%) [TC425917]	GGAGATACAGCTGTAATTCCTTCACTTTGCTAGTTATGTTATTATGTTAGTCCCAAATTG
A_73_100169,A_73_P414091|533243	0.00739517	7.58031e-05	down	1.9072	-1.9072	-0.93146	ZNF143	Bos taurus zinc finger protein 143 (ZNF143), mRNA [NM_001102154]	ATCAGATTGCAAACTCCTAGAGTCTACGTGCAAGAACCAGTGAAGTCTTACGGAGTCTTA///AAGATAGTTATGACCAGAGTGCATTACAGGCAGTTCAGTTGGAAGATGGCACCACAGCTT
A_73_P454156,A_73_117633|508989	0.00762091	8.45058e-05	down	1.90999	-1.90999	-0.933569	SLC39A2	Bos taurus solute carrier family 39 member 2 (SLC39A2), mRNA [NM_001205648]	GTATTTGACTCTTGTCCCATTTGTGCTGTTATGTGTAATAAAATGTCATTTTGTCCTTCC///GGCATTCTGATGATGATGCTGATTCAGCTTATATGGAGTATCCCTACGGAGAGCTCATCA
A_73_117606,A_73_P307966|614203	0.00771265	8.71557e-05	down	1.91066	-1.91066	-0.934071	GALNT18	Bos taurus polypeptide N-acetylgalactosaminyltransferase 18 (GALNT18), mRNA [NM_001076316]	CGCTGAATGGTGGGTGAGGGTATAATATCATAAACTATTTTGCAACTGTAAATAGGGGAC///TCTCCCCATCCTTTGACAACATCAAATACGACAACTTTGAGATAGAAGAGTACCCGCTGG
A_73_P499023,A_73_111731,A_73_P251366|617342	0.048927	0.00412085	down	1.91406	-1.91406	-0.936632	CCDC83	Bos taurus coiled-coil domain containing 83 (CCDC83), mRNA [NM_001038218]	CCTGGAAGATGCTAGAAAGAGAATAATCAGAGAAACTTTGTTTGCACTGGACCAAAAGAA///CCACTTCCAAGAGAAGGAAACTCCAGTCAAATTCTATGAAGATGTCAGGAGCCCAGAAAG///ACCCTGGAAGATGCTAGAAAGAGAATAATCAGAGAAACTTTGTTGCAACTGGACCAAAAG
A_73_114661	0.0305271	0.0016774	down	1.91712	-1.91712	-0.938941		Rep: Poly(A) polymerase beta - Xenopus tropicalis (Western clawed frog) (Silurana tropicalis), partial (4%) [TC472510]	GTGGATTTTATTGAGACCTAAAGGCATTTTTGATGACATTGTTACCAACCATTAATTGGC
A_73_P038586,A_73_P264771|529327	0.010051	0.000174058	down	1.92077	-1.92077	-0.941684	RELL2	Bos taurus RELT like 2 (RELL2), mRNA [NM_001046303]	CAGGCTCTGGCTCGGGCTTTGTGCCCTTTATTCACTGTCAATAAATCCACTCAGACCATT///ATGAATGAGGACACAGTAGAGAGGATTGTTCGCTGCATCATCCAAAATGAAGCCAACGCT
A_73_P300371,A_73_P047141,A_73_P320291|529071	0.0053713	2.49704e-05	down	1.92923	-1.92923	-0.948022	PAPOLG	Bos taurus poly(A) polymerase gamma (PAPOLG), mRNA [NM_001098066]	CAAAGAACATCCGTGTCATCAAAAATTCCATTCGGCTGACCCTAAATCGGTAAAAGCAAT///ATGGGAACCAGTTCTTGGCTCTTTGGACACTCATAAAACAAGTCCTGAAATATCCACCGC///GAAACATCAAGATGGCATTAGAAACTTAAGAGCTTGTAGAAGATGCCTTTGTGCCTGTTA
A_73_105592	0.0418825	0.00304986	down	1.93118	-1.93118	-0.949484		LB01632.CR_K06 GC_BGC-16 Bos taurus cDNA clone IMAGE:8323424, mRNA sequence [EE333256]	TGAACCAGTAGAACAGCTCAACTCAAAATTGAGTTTTGGGAATACAGTAATAGCTCTTGG
A_73_P064256|526435	0.0283171	0.00146101	down	1.93292	-1.93292	-0.950779	DLGAP1	Bos taurus DLG associated protein 1 (DLGAP1), mRNA [NM_001192629]	TCAGTTAAAGGCCAATAATTGGAAACAGATGGATCCTCTTGACAAGAAGGAGCGAAGGGC
A_73_102448	0.0186802	0.000625506	down	1.93591	-1.93591	-0.95301		Rep: GTP-binding nuclear protein Ran - Homo sapiens (Human), complete [TC400559]	TACTTGAATCATTTCACACAAACGTAACGACAAGTCAACAGTATTGTATTTGATGAGAGG
A_73_104693	0.00428729	1.10028e-05	down	1.93625	-1.93625	-0.953268		Rep: IP20108p - Drosophila melanogaster (Fruit fly), partial (11%) [TC404836]	TTGTTCTTTTGGTATAGATCAGCCAAATCTTGTCTTGTGTCTTTTGCTCATTGTCTTAAG
A_73_P060261|100336729	0.0238215	0.00101005	down	1.93815	-1.93815	-0.954679	C26H10orf76	chromosome 10 open reading frame 76 [Source:HGNC Symbol;Acc:HGNC:25788] [ENSBTAT00000017436]	TAAACTACTTTGCTATCAGAAGAAGTGTAGAGTACGCCTGCATTATACCTGGCGGGAGCT
A_73_P101646,A_73_P391426,A_73_P106491,A_73_P318561,A_73_P104126,A_73_P495743,A_73_107420,A_73_P475252|281427	0.0119913	0.00024355	down	1.94111	-1.94111	-0.956883	PRNP	Bos taurus prion protein (PRNP), transcript variant 1, mRNA [NM_001271626]///Bos taurus prion protein (PRNP), transcript variant 2, mRNA [NM_181015]	AGAACTTCACCGAAACTGACATCAAGATGATGGAGCGAGTGGTGGAGCAAATGTGCATTA///CCAGTGCTAGTGTTGGACTGATAAGATTATAACAACAAATATAGGTTATGTGATGAAGAG///TTGTTTATCTGGAACCCAGGATGATTTTGACATTGTTTAGAGATGTGAGAGTTGAACTGT///CATGAGCAGGCCTCTTATACATTTTGGCAGTGACTATGAGGACCGTTACTATCGTGAAAA///CCTTGAAAACCATTTGCACCATCTCAGTTATGTTAATAACTTTGATGTTTGAGTTCCACA///CGTGCACTGAATAGTTTTGTATAAGAATCCAGAGTGATATTTGAAATACGCATGTGCTTA///TTGTTTTGTGTTAAAAGTTTA…
A_73_P035886|509481	0.0184323	0.000610805	down	1.94481	-1.94481	-0.959631	HAO2	Bos taurus hydroxyacid oxidase 2 (long chain) (HAO2), mRNA [NM_001035071]	GCTAAATAAGATCTGACACTTGAAGACATTAAGGAAGTTAAGGATAAATTCCCGATATCC
A_73_P205627	0.0303749	0.00165948	down	1.94574	-1.94574	-0.960322		PREDICTED: Bos taurus uncharacterized LOC540056 (LOC540056), partial mRNA [XM_591217]	AGCTTTGATAGGAATAATCTGAATGGAGAAAGCAAACTGCTGAAACTAACATTCCCTGCC
A_73_P037501,A_73_P208327|282151	0.00887382	0.000122762	down	1.94626	-1.94626	-0.960706	BCL2A1	Bos taurus BCL2 related protein A1 (BCL2A1), mRNA [NM_001037100]	CTACACAGAGAACTTTGATGATGTAACTTAACATTCTGAAGTTATGGGAATTTTCTCCCC///CATTGTTAACTGGGGCAGGATTGTAACCATATTCGCCTTTGAAGGTATTCTTACCAAGAA
A_73_P511295|282321	0.0111096	0.000207434	down	1.95072	-1.95072	-0.964008	PPP3R1	LB01642.CR_I21 GC_BGC-16 Bos taurus cDNA clone IMAGE:8327231 5', mRNA sequence [EH171324]	TATATATAGATCGAAGATTGTACAGTTTGAGCCGGGTGTTAGGCCAGCTGTTTTCCTTTG
A_73_P334011,A_73_110426,A_73_P365866,A_73_P039516|100271720	0.00409472	7.10214e-06	down	1.9596	-1.9596	-0.970557	F8	Bos taurus coagulation factor VIII (F8), mRNA [NM_001145508]	AATGTTCTTGGAACCAGATCTTTTGTCTTCCTGCTGGAATAGTCAATAATCAGTTGAATA///GCCACTGGGAATGGAGAATAAAGCTATATCAGATACACAGATTACTGCCTCATCCCACTT///GTCTGGCAGGATATTGTAATAGACAGTAATACCAACTTTCAAGAAGTGACTTCTTTGATT///TTTCTTCAGAATGGCAAAGTGAAGGTTTTTCAGGGAAATCAAGACTCCTTCACCCCCGTG
A_73_105611	0.00432694	1.17065e-05	down	1.96575	-1.96575	-0.975083			TCTACCTGTCTGTTCCACCAGTTTGAGATGTGCACCATTGAAAAGGAAATAAAAGAGCTG
A_73_115124	0.0214523	0.000834785	down	1.96651	-1.96651	-0.975639		Rep: Bll4104 protein - Bradyrhizobium japonicum, partial (7%) [TC414017]	GCAGAAAACTAGATCTCCTTTAAAAACAAAAACACTTGTAGGAAGAGAGGTGCTATGGGT
A_73_P102221	0.0112885	0.000214217	down	1.96772	-1.96772	-0.976527		calcium voltage-gated channel subunit alpha1 C [Source:HGNC Symbol;Acc:HGNC:1390] [ENSBTAT00000014104]	TGGCAAAATTGCCCTGAATGACACGACAGAGATCAACAGGAACAACAACTTCCAGACCTT
A_73_P048726,A_73_P203699|781988	0.0489192	0.00411081	down	1.96836	-1.96836	-0.976995	LOC781988	Bos taurus uncharacterized LOC781988 (LOC781988), mRNA [NM_001101281]	CTCAGCTTATTGAGTCAAAGGTCAAACTCTCACTCCAAAAATATGCCACATGATTTATAA///ATGCAGAGGCTGGAGAACTGGTTATCGTATACAATAAATGACCTGATGTATTCATATTTT
A_73_107485	0.00595071	4.29081e-05	down	1.97608	-1.97608	-0.982644		Rep: Taste receptor type 2 - Bos taurus (Bovine), partial (24%) [TC427975]	GAATATGGCATCAAATTAGATCATAGAGGACCAACAGTTTACCACAGAGGCAAAAGCAAA
A_73_107227	0.0223024	0.000899596	down	1.97738	-1.97738	-0.98359			TGCAAGGCACAATTCCACTCTGGCCCTTGTTATTTATCTTGTATAATATCACTAAAGGCT
A_73_114509	0.0244909	0.00108069	down	1.98871	-1.98871	-0.991832		Rep: Predicted protein - Coprinopsis cinerea okayama7#130, partial (7%) [TC430720]	ACAAAGATATTTTTCTACACCCATAAACTCAAATCAAATTTTGGCTTTAGCTGTGCCAGC
A_73_P063121|538425	0.0345618	0.00214802	down	1.99007	-1.99007	-0.992819	CTDSPL	Bos taurus CTD small phosphatase like (CTDSPL), mRNA [NM_001193081]	TGTTCCTGTTGAAATTGATGGAACTATACATCAGGTGTATGTGCTGAAGCGGCCACACGT
A_73_P174052	0.0161692	0.000465234	down	1.99291	-1.99291	-0.994879		594403 MARC 6BOV Bos taurus cDNA 5', mRNA sequence [CB421387]	GTCAAAGTACAGAGTTGGAAGATGGCAAGTAACTTGGTGAGAATGGCTGCAAATCCTTGC
A_73_101588|615514	0.0119913	0.000243588	down	1.99887	-1.99887	-0.999184	LOC615514	Bos taurus glutathione S-transferase mu 1-like (LOC615514), mRNA [NM_001083772]	GATGTCCTTGACCGGCACCGCATATTTGAACCTACATGTCTGGATGAATTTCCAAACTTG
A_73_P395096,A_73_104733|518169	0.00409472	8.30574e-06	down	2.00116	-2.00116	-1.00084	CTSA	Bos taurus cathepsin A (CTSA), mRNA [NM_001035326]	AATGGACTCTCTTCCTATGAGCAGAATGACAACTCCCTGGTCTATTTCGCCTACTACCAT///AATCAAAACAAAGCTCAGAACACCCCACAGGGAGAGTGGACGGACTGTAATTGATGGATT
A_73_P030611|615756	0.0243792	0.00106461	down	2.00382	-2.00382	-1.00275	ELOVL2	Bos taurus ELOVL fatty acid elongase 2 (ELOVL2), mRNA [NM_001083517]	CGTCTCAAAGACAAAGCATATATAATAGCCTAACAGATCCGCTTGTTTTAAAGCAAAGAC
A_73_P044881|513953	0.0311704	0.00175203	down	2.01972	-2.01972	-1.01416	SLC26A2	Bos taurus solute carrier family 26 member 2 (SLC26A2), mRNA [NM_001040525]	GACTCTCAGAATCAAAAAGAGAGACATATTCCCAATGGTCCGAATTTTTCCAGTGATTGA
A_73_106862	0.0496016	0.00424806	down	2.02176	-2.02176	-1.01561		Rep: Zinc finger protein 782. - Bos Taurus, complete [TC453088]	ACTTGGAAGTTCTTATGCAAGATACTAGTTTCACTCAACATCAGAAAACTTAACATGAGC
A_73_117089|615392	0.0357732	0.00229701	down	2.02256	-2.02256	-1.01618	TIGAR	Bos taurus TP53 induced glycolysis regulatory phosphatase (TIGAR), mRNA [NM_001076370]	TCAGTCAGCCCTAACACAGGGATGACTGTCTTCATCCTAAACTTTGAGAAAGGAGGCAAA
A_73_120633,A_73_P107656,A_73_P032421|282229	0.0185266	0.000616405	down	2.02893	-2.02893	-1.02072	FCGR2B	Bos taurus Fc fragment of IgG receptor IIb (FCGR2B), mRNA [NM_174539]	AGTGATTGTTTCTGGGGATGGAATTATTGGTGCTTTTCATTTGCTTTGTTAATTCTTCTG///TGTTGCAGAGGAAGACTCAGAGTCCGATTACCAGAAACGCCTTTAGTTTTCATTGTCTCG///TTCTACCAGGATAGGAAATCCAAGATATTTTCCTATCAGCGCACCAACTTCTCTATCCCA
A_73_104487	0.0377188	0.00252675	down	2.03065	-2.03065	-1.02194		Rep: Ser/Thr protein phosphatase family protein - Coxiella burnetii Dugway 5J108-111, partial (5%) [TC490879]	AACACACACTGCCGTGTTCTAGAATGGGAAGCAGACTTGACCATTTACTAGAAGGCATGT
A_73_115187|785769	0.00595071	4.39476e-05	down	2.03349	-2.03349	-1.02396	SPATA13	Rep: Spermatogenesis associated 13 - Homo sapiens (Human), partial (72%) [TC486344]	CTGCCTGATCAATGAGCGGAAACGCAAGCTGGAAAGCATAGACAAGATCGCGCGGTGGCA
A_73_P060479	0.0329875	0.00196218	down	2.03843	-2.03843	-1.02746			TTGAATCGACGGAACAGCTACCGTCTCGACCTTCTCAATTAGACGTGTCTTTTTCTGCAT
A_73_P068061	0.048927	0.00412344	down	2.04766	-2.04766	-1.03398		myosin binding protein C, fast type [Source:HGNC Symbol;Acc:HGNC:7550] [ENSBTAT00000026756]	TATTTCGTCCAGAAAGCCGACAAGAAAACCATGGAGTGGTTCACAGTTTATGAGCGCAAC
A_73_P046986|781260	0.0088686	0.000119969	down	2.05067	-2.05067	-1.03609	CISD2	Bos taurus CDGSH iron sulfur domain 2 (CISD2), mRNA [NM_001080338]	GTGAATACCCGAATTTCAGAAAAAACAGGAACTGGGTATAAAGTTTCAACCAGGAACAAT
A_73_P136571	0.00594423	4.16773e-05	down	2.05811	-2.05811	-1.04132		LB03421.CR_D02 GC_BGC-34 Bos taurus cDNA clone IMAGE:8661268 5', mRNA sequence [EV666534]	AACATCATCCTTCACTTAGTAGGGCTATTGTTGCTCAAAAATGTTTCTGGAACTGACTTC
A_73_117262|536741	0.00441801	1.3468e-05	down	2.0606	-2.0606	-1.04306	MME	Bos taurus membrane metalloendopeptidase (MME), mRNA [NM_001192884]	TCTTCTCTGAGGGTGGCTATGATAAAAAGGCACAACTGCATTTATGTAGCTCTGCATCTC
A_73_P039931|505574	0.0108373	0.000197273	down	2.0633	-2.0633	-1.04495	CD59	Bos taurus CD59 molecule (CD59), mRNA [NM_001037446]	AATGCAGTTTTGAGTTCATTGCAAAAGCCTTAGGGGAGAAGGAGCTCCACTATGACTGCT
A_73_P288476,A_73_P088031|511050	0.00489332	1.79844e-05	down	2.07184	-2.07184	-1.05091	IDUA	iduronidase, alpha-L- [Source:HGNC Symbol;Acc:HGNC:5391] [ENSBTAT00000009212]	TCCATGACCTTGCAAGGCTTCTTGAACTACTACGACGCCTGCTCCGAGGGTCTGAGAGCA///TGTTCAGCCCAGACACAGCTGTGGTCTCTGGCTCCTATCGGGTTTGTGCTGTGGACTACT
A_73_P075171|539611	0.039401	0.00274054	down	2.07732	-2.07732	-1.05472	RNF26	ring finger protein 26 [Source:HGNC Symbol;Acc:HGNC:14646] [ENSBTAT00000016674]	AATGGCCATGCTTTGCTGCGTCAGATCTGTGACGTCTGTGCCATCACCATGAGCCTGGTG
A_73_109254	0.0471223	0.00382645	down	2.09671	-2.09671	-1.06813		Rep: Wwp1 protein - Mus musculus (Mouse), partial (16%) [TC436685]	TATGTTCTACGTTTTTATTCAGAATTCATAGTAAAGATGAAATAAAAGTCCGTGATCCAC
A_73_P087456	0.0465181	0.00369817	down	2.09887	-2.09887	-1.06961		Hw_Fat_41_050806_H08 Bos taurus CF-24-HW fat cDNA library Bos taurus cDNA, mRNA sequence [DV776311]	CCCAGTAGAAACAGATATTCTGAAAGAGGACTTAGACAATCATTCTGAAAATGCTTTACA
A_73_P084731|521413	0.0259798	0.00124737	down	2.1056	-2.1056	-1.07423	GRK6	Bos taurus G protein-coupled receptor kinase 6 (GRK6), transcript variant 2, mRNA [NM_001205390]	AAAGATGTTCTGGACATTGAACAGTTCTCAACAGTTAAGGGTGTGGAGCTAGAGCCCACT
A_73_P174417	0.00842574	0.000110047	down	2.10731	-2.10731	-1.0754		LB01730.CR.1_H09 GC_BGC-17 Bos taurus cDNA clone IMAGE:8099099, mRNA sequence [DV819887]	CAAAGAAGTCTTTAGAGACCATCAGGTTAAACACTAATTCAGTAGATGAGAGACAGACTC
A_73_P087941|532960	0.00913382	0.000144219	down	2.11041	-2.11041	-1.07752	KLHL8	kelch like family member 8 [Source:HGNC Symbol;Acc:HGNC:18644] [ENSBTAT00000003191]	TGTCAGCCTATAGGATCATAGGCTTCATTTCAGTTTGAATTGTTAGGACACCAAAAGATC
A_73_P252786,A_73_P283836,A_73_P252571,A_73_112957,A_73_P253656,A_73_P177797,A_73_P268131|280988	0.00913382	0.00014444	down	2.12565	-2.12565	-1.08791	AHSG	Bos taurus alpha 2-HS glycoprotein (AHSG), mRNA [NM_173984]	AGAAAAGCAATATGGCTTCTGTAAAGGGTCAGTCATTCAGAAAGCTCTTGGTGGGGAGGA///AAAGTAATTGGAACTGTGACTTTGAAAGGTGCTCTTGCCAAGTTTATATCTACTTGTCAT///TACTGGCAGAAAAGCAATATGGCTTCTGTAAGGGGTCAGTCATTCAGAAAGCTCTTGGTG///CTGTGACTTTGAAAGGTGCTCTTGCCAAGTTTATATCTACTTGTCATTAAAAATGCTCTA///GAACTGTGACTTTTGAAAGGTGCTCTTGCCAAGTTTATATCTACTTGTCATTAAAAATGC///AAACAAGATGGCCAGTTTTCCGTGCTGTTTACAAAATGTGATTCCAGTCCAGATTCCGCC///AAGTCGTAGATCCAACCAAGT…
A_73_P075401|539064	0.0447545	0.00343806	down	2.12899	-2.12899	-1.09017	LOC539064	GB	TCCCCTGATCTATAGCTTGAGGAACACAGAAGTAAAGAACACCCTGAAGAAGATGCTGGA
A_73_115230	0.0140489	0.000341733	down	2.13336	-2.13336	-1.09313		LB02821.CR_M15 GC_BGC-28 Bos taurus cDNA clone IMAGE:8227769, mRNA sequence [DV911689]	ATGGAAGGAGCAAACCAACAGACTGTCCCAGAAAACGAGACAGGAAACCCCCAAGCTGCC
A_73_P043786,A_73_P415621,A_73_P458131|539290	0.00409472	9.32576e-06	down	2.13866	-2.13866	-1.0967	PLSCR4	Bos taurus phospholipid scramblase 4 (PLSCR4), mRNA [NM_001081732]	AGCCTTTGCCCATTGAATTTCCTATTGAAGTTTGTATTGAAGTGAAAGAAAGGTGCCTCA///TGATGATTAATTAAAGAAAAATTTAGAAAAGTTGCCTGGGCTCATAGTCAACCCTCAACG///TGAAATTCACTTCCCATTAGACCTGGATGTGACCATGAAAGCCATGATTTTTGGAGCTTG
A_73_115621	0.048728	0.00408123	down	2.13892	-2.13892	-1.09688		GB	GCGCTTTGTAAAGAATATAACTTCCTGGAAAGAGATGAAACCAGGGTTTTATCATGGGCA
A_73_112946	0.0202722	0.000726132	down	2.14395	-2.14395	-1.10027		Rep: Probable cystathionine gamma-synthase (EC 2.5.1.48) (O- succinylhomoserine (thiol)-lyase) - Schizosaccharomyces pombe (Fission yeast), partial (3%) [TC425046]	TTTCAAAGGGTCAGAATGTATTAGTAGGCTGTGAAATCAATCTCATGATTTACAACTAGC
A_73_P420461,A_73_106053,A_73_P402096|516087	0.0188863	0.000636909	down	2.14486	-2.14486	-1.10088	SCARA5	Bos taurus scavenger receptor class A member 5 (SCARA5), mRNA [NM_001102499]	TGCTGGTCTTTCTGATTCTCGTGGGCATCTTCATCTTAGCAGTGTCCAGGCCCCGGAGCT///TTCAGGGACTAAGGGAAATTAGGCCAGGCCTAAAATACATTAGACCTTTTGTAAGAATTT///GACCTCTGTAATTCCCATCCCAGGACCACGGTGACCTGTCACCCTCCTCCTCTTGGACAT
A_73_P411521,A_73_P127506,A_73_P073616|539369	0.0361722	0.00234321	down	2.15009	-2.15009	-1.1044	NRP1	Bos taurus neuropilin 1 (NRP1), mRNA [NM_001205660]	ATTCAGGATCACACAGGAGATGGCAACTTCATCTACTCCCAGGCTGATGAAAACCAAAAG///TCTCAGACACTGAGTTGCATAAAACAACCACATAGAACTGAACTGTAACTTAAATTCCAA///AATCAAATGCTGGTGTTGAGACCAAGTATGATTGACTTAATCATTCGAAGGACTCCCCTT
A_73_P434501,A_73_P043196,A_73_P102366|533203	0.0159647	0.000448957	down	2.15172	-2.15172	-1.10549	MMP19	Bos taurus matrix metallopeptidase 19 (MMP19), mRNA [NM_001075983]	ATACCATTTACTTGGGCCATAAAAACACCTTGAACTCTGGCGGCTCACCCAGAGATACAA///TCTGAAAAATAAGGTTAACACCAATCCCGCAGGGTTGTTGCATTAAAAGAAATACTGTGT///CTACATTAATTTCAAGATGTCTCCTGGCTTTCCCAAGAAGCTGAATAGGGTAGGACCCAA
A_73_106567,A_73_P422711,A_73_P373286|512171	0.0208132	0.000769974	down	2.1693	-2.1693	-1.11723	ADAMTS1	Bos taurus ADAM metallopeptidase with thrombospondin type 1 motif 1 (ADAMTS1), mRNA [NM_001101080]	CCTGATGACCTGGGGACCTCCTGTATTTCTTTCCTCCTAATGTAAGCCAACTTAAGGAAT///ACCTTTAGAATGGAACAGTGTGAGGCACACAATGAATTCTCCAAAGCTTCCTTTGGCAGC///TTTGTGAAGAAGAAGAAGGAATCTTTCAACGCCATCCCTACTTTCTCGGAGTGGGTCATC
A_73_109504,A_73_P410286,A_73_P254606|781953	0.00657759	5.65971e-05	down	2.18654	-2.18654	-1.12865	MATN2	Bos taurus matrilin 2 (MATN2), mRNA [NM_001102528]	AATCTGCAGTTTTACAGACTTAACTTCCGTAGAACACTGGCCATGGGAAAGCTATTTTTT///AGAACGAGTTCTCCCTCAAGACCTTCAAGAGGAAGTCCGAGGTGGAGCGTGCCGTCAAGA///TGATTTGCTACAGAACAAAGGCAAAACACACACACTAACTTGTACGAATTCACTGAGAAA
A_73_P032021,A_73_P479758|516058	0.0161692	0.000467031	down	2.20643	-2.20643	-1.14172	HPD	Bos taurus 4-hydroxyphenylpyruvate dioxygenase (HPD), mRNA [NM_001015611]	AATATTGATATCCTAGAGGAGCTGAAGATCCTGGTAGACTACGACGAGAAAGGCTACCTC///AAGATGAACTATACTGGCCGGTTCCTGCCTGGATTCGAGGCACCACCATTCATGGACCCC
A_73_P252211,A_73_P038096,A_73_104001|530076	0.00900926	0.000127557	down	2.20853	-2.20853	-1.14309	GC	Bos taurus GC, vitamin D binding protein (GC), mRNA [NM_001035380]	GCATCAAGGAGCTTCCTGAATATGCAGTAAAACTCTGTGACAACTTATCCACTAAAAATT///TCACCTCCTCTCTACTGCAATTCAGAGATTGATGCTGAAATTAATACCCTACAGTCCTGA///TGGGGAGACAGCTAGGATACTCCCTGCTTGTTTTCAGCTACAATATCCTCATCTGATGTT
A_73_P047066|533635	0.0161631	0.000462613	down	2.21853	-2.21853	-1.14961	MCTP1	Bos taurus multiple C2 domains, transmembrane 1 (MCTP1), mRNA [NM_001104987]	CTCACCTAGTGTTCACTAGGTTTTCTCCTGGCCAAAATAAAATTTCAAAAATCTTAAGGA
A_73_112594,A_73_P116041|317777	0.00409472	9.10466e-06	down	2.22144	-2.22144	-1.1515	PLA2R1	Bos taurus phospholipase A2 receptor 1, 180kDa (PLA2R1), mRNA [NM_175051]	CCTGTTAAGAACCAAGAGCCATTTTAGAAACTGGAGGTACTGGGGTAAGCACTTAGTTTC///CATCTTGCAAGCTTTGCCCATATTGAGGAAGAGAATTTTGTGAATGAGCTTTTACATTCA
A_73_P084386	0.047962	0.00397505	down	2.22194	-2.22194	-1.15182		mitogen-activated protein kinase kinase 7 [Source:HGNC Symbol;Acc:HGNC:6847] [ENSBTAT00000014063]	AAGTATAATAAGCTACTTGAACACAGCTTCATCAAGCGCTACGAGACGCTGGAGGTGGAT
A_73_121440,A_73_P108921,A_73_P102766,A_73_P103401|407998	0.00201298	9.20463e-07	down	2.22616	-2.22616	-1.15456	F11	Bos taurus coagulation factor XI (F11), mRNA [NM_001008665]///Rep: Coagulation factor XI precursor (EC 3.4.21.27) (Plasma thromboplastin antecedent) (PTA) (FXI) [Contains: Coagulation factor XIa heavy chain; Coagulation factor XIa light chain] - Bos taurus (Bovine), partial (60%) [TC394151]	TGGGTAGAGACAAGCTATGAATAAGTGAGTGTGAATGTGGACTCCAGAATTTCTGTAAGG///GGAACTCTTTTGGGAAGAAAGAACTTAACTGAATTTGATGGCAGGTTTCAGAATAATCAA///TTGATGACCAATGAAGAATGCCAGGCAGGTTACAGAGAGCACAGAATAACCAGCAAGATG///GCCTTCAGATTTCCTGCGAGTGTTTGGAGTATTTATGAATATTAGCAAAAGTTACAGTAA
A_73_P038421,A_73_P511838|535869	0.00166106	3.85921e-07	down	2.25692	-2.25692	-1.17436	RNF128	Bos taurus ring finger protein 128, E3 ubiquitin protein ligase (RNF128), mRNA [NM_001076071]	CCAGTACAAATTCCAGCAGAATTTAAGCAAAAGCAGAATAGACATGTATTTTTGTTGGCT///GCATTCTTGTACACTGATTTGAAATGCTGTAAATAGGTCCCGATTTGTATTGATTCTCTT
A_73_105677	0.0249305	0.00112193	down	2.25876	-2.25876	-1.17553		Rep: Uncharacterized small conserved protein, homolog of yfjA/yukE B.subtilis - Clostridium acetobutylicum, partial (12%) [TC477196]	TCTGCATCATCCCTTATTTTGCCACTGTAGAATAATTCAAGAATCCTTTGTCAATTTGTC
A_73_107023	0.0260505	0.00125589	down	2.27422	-2.27422	-1.18537		Rep: Reverse transcriptase-like - Bos taurus (Bovine), partial (45%) [TC446320]	AGTTTCTGAAAGTTGGATGATTGCTAAATCCAAAAGTACCCCAAAGTGAGGTTTCACACA
A_73_P206497,A_73_P255416,A_73_P418721,A_73_114352|505054	0.00166106	2.84135e-07	down	2.28399	-2.28399	-1.19156	SCPEP1	Bos taurus serine carboxypeptidase 1 (SCPEP1), mRNA [NM_001045909]	TTGGAAACTTTGAGGAAATCGGGCCGCTTGATAGGAATCTCCAGCCACCAAACACCACTT///TATCTATATGCTCCTTTCCCAGGGAAAAGCACTATTACCAGTTAAGTGTTCTCCCGACAA///TCTCAGAGTCTTATGGAGGAAAGATGGCTTGCTGGCATCGCTCTAGAACTTTATAAGGCT///TGTGTTATGTCATGGTCCATTTTGTTCACACATCAGTATGTCCTGAACACCTTTTCGTGT
A_73_P056886	0.0456218	0.00357348	down	2.29941	-2.29941	-1.20126		G protein-coupled receptor 143 [Source:HGNC Symbol;Acc:HGNC:20145] [ENSBTAT00000008485]	AAATGCAACCAGATATCAACAGCAGCTCTTTGAAACAGGTCAGAAACGCAGCCAAGACCA
A_73_100765,A_73_P087741,A_73_P167052|533587	0.0200751	0.000712518	down	2.29994	-2.29994	-1.20159	UGT2B10	Bos taurus UDP glucuronosyltransferase 2 family, polypeptide B10 (UGT2B10), mRNA [NM_001046354]	ACTTCATTTTCAAGGGATTTTCTACTTGAGTTAGAAATATGGCTTGCCAAGGAAAAACAC///CTGGACTTGGAAACAATGTCAACAGAAGATTTGCTCAATGCATTGAAGGAAGTTATTAAT///ACACCTGGATCTTCAGTTGAAAAGAAGAGTGGAAGGCTTCCATTCCCACCATCCTATGTA
A_73_102399|518563	0.0408502	0.00292799	down	2.30371	-2.30371	-1.20396	HS6ST1	Bos taurus heparan sulfate 6-O-sulfotransferase 1 (HS6ST1), mRNA [NM_001192491]	GCAGCTGTACGACTATGCCCGGGACCTCTTCCAGCAGCGTTACCAGTACAAGCGGCAGCT
A_73_P371671,A_73_P250781,A_73_104443,A_73_P450591,A_73_P338026,A_73_P250486|281877	0.00900926	0.000138007	down	2.37067	-2.37067	-1.2453	ITGB2	Bos taurus integrin subunit beta 2 (ITGB2), mRNA [NM_175781]	CATTTTGTATGGTTACACACAGGTCCTTTGTAAAAATTAGTACAGCAGTCTGATGAAGAA///TTATTTATGTGTGAACTTCTCAGGGTATGAAGTTACATCCCCTTGGTTATGCTGCCCCCA///ATGTGTGAACTTCTCAGGGTATGAAGTTACATCCCCTTGGTTATGCTGCCCCCAATCAAT///AAAGGGCTGCCCAGCTGATGACATCATGGAACCCAAGAGCCTCGCTGAGACCCGGGACAG///ACAAGAAGATCTACGGCCAGTTCTGCGAGTGCGACAACGTCAACTGCGAACGCTACGACG///TACCTGATGGACCTCTCCTACTCCATGGTGGATGACCTCGTCAACGTCAAGAAGCTGGGG
A_73_P404531,A_73_118758,A_73_P101236|281408	0.0277247	0.00141301	down	2.38346	-2.38346	-1.25306	PLAU	Bos taurus plasminogen activator, urokinase (PLAU), mRNA [NM_174147]	GAAATTCCAAGGGGAACACTGTGAGATAGATACATCGAAAACCTGCTATCAGGGGAATGG///CTGAGTTCATCCAATCCTCACTGAGTGAGGCAAGGACCACTCCTGTACACTGAATATTTA///AAATTGGCCTAAAGCAGTTTGTCCAGTTCTGCATGGTGCAGGACTGCTCTGTTGGAAAAA
A_73_121157|508777	0.0179431	0.000567017	down	2.39012	-2.39012	-1.25708	CDH16	Bos taurus cadherin 16 (CDH16), mRNA [NM_001015550]	CGGCTCATGTCTGTCCAATAATAAAGCCTCAGAGAACTGGCCATGAGTCCTCAGAGACCA
A_73_P048146|281805	0.00572615	3.73117e-05	down	2.4048	-2.4048	-1.26591	GSTA2	Bos taurus glutathione S-transferase alpha 2 (GSTA2), mRNA [NM_177515]	CACGTATAAAATCACGATCTCCTCCTAGAATGTGTTTCAGACCTAAACATAAATAAAAGG
A_73_119235,A_73_P348906|515263	0.0319215	0.00185255	down	2.41191	-2.41191	-1.27017	ALDOB	Bos taurus aldolase, fructose-bisphosphate B (ALDOB), mRNA [NM_001034485]	CAGAGAAGCGCATCTTATTAAACAGTTTTAGCAGTGGTAGGTTATGAAGGAGACAGCTGC///AAAGAAACCACCGTTCAAGGGCTTGATGGCCTTTCTGAACGCTGTGCTCAGTATAAGAAA
A_73_114984|281095	0.00192866	7.85684e-07	down	2.4196	-2.4196	-1.27477	CSF2	Bos taurus colony stimulating factor 2 (CSF2), mRNA [NM_174027]	CTGGCTTGTTCAGGGCCATGTTGACCCTGATACAGGTGTGGCAGGGGAAACGGGAAATGT
A_73_P111931,A_73_P471828,A_73_P045236|286869	0.0218055	0.000860413	down	2.43337	-2.43337	-1.28296	CHI3L1	Bos taurus chitinase 3-like 1 (cartilage glycoprotein-39) (CHI3L1), mRNA [NM_001080219]	TTTTGGCAAGCTCTGCTGCCACACAGCCTTATAAGAAGCAGCAACCACACTAATTACACT///CTTCGGTTCTCAAAGATTTTCCAAGATAGCTTCCAAGACCCAGAGTCGCAGGACTTTCAT///AATTCCAGGCCAGTTCACCAAGGAGAAAGGGATCCTTGCCTATTATGAGATCTGTGACTT
A_73_100485	0.0479579	0.00397288	down	2.441	-2.441	-1.28747		Rep: Tumor necrosis factor receptor superfamily member 17 (B-cell maturation protein) (CD269 antigen). - Canis familiaris, partial (51%) [TC481301]	TGTTGGGAGCTTAACTCTGGAAACTTCCTTGGTTTCATGATTAAATTGACTCACTGAAAA
A_73_P222922|520039	0.0341354	0.00208896	down	2.45595	-2.45595	-1.29628	RASGRF1	Bos taurus Ras protein specific guanine nucleotide releasing factor 1 (RASGRF1), mRNA [NM_001191457]	TCTTTTGTAATGGATGAAGAAAGCCTCTACGAGTCTTCTCTCCGAATAGAACCAAAACTC
A_73_P048136|281235	0.0110367	0.000205653	down	2.45934	-2.45934	-1.29827	IDH1	Bos taurus isocitrate dehydrogenase (NADP(+)) 1, cytosolic (IDH1), mRNA [NM_181012]	TTACAGCCTTTTTCTTATGCATACAGTTATGCCACCTTTGTGAATGTGGCCGGGGACTTT
A_73_P074946	0.0118189	0.00023385	down	2.46826	-2.46826	-1.30349		LB02916.CR_O02 GC_BGC-29 Bos taurus cDNA clone IMAGE:8236252, mRNA sequence [DV919718]	AATCTGCTCGAGCAATTGTTTTTCAGATATCGGAATTCAGCAATGAATGACCTCCTCTGG
A_73_103176,A_73_P257386|515018	0.00701419	6.79679e-05	down	2.50534	-2.50534	-1.32501	ISLR	Bos taurus immunoglobulin superfamily containing leucine rich repeat (ISLR), mRNA [NM_001080729]	TTCCCCCACAACCTTGGGAGAGACTAGCCAGCCTGGGGGCGGCAGAGAAATAAATAGCAT///AAGAAGTTCTGCTTGACTAAGAAAGAGTAGTTTGAAGGATGCAGGAGCTGCGTCTGCTGT
A_73_115628	0.0409758	0.00294233	down	2.53564	-2.53564	-1.34235		Rep: Coiled-coil domain-containing protein C6orf185 - Homo sapiens (Human), partial (82%) [TC433804]	AGCTTTTCAAGTTTAAACGGCTCCATCCAGAACCCCATTTAGACCTGATTGGTAATCATA
A_73_107382	0.0483725	0.00402567	down	2.57922	-2.57922	-1.36694			TCAGGTTCGGGGCTCACGCGAAGCCTGGAATGGTAATAAATCTTTTTGACTTTCTGAGAA
A_73_P331106,A_73_107486|521854	0.00911845	0.000142459	down	2.60821	-2.60821	-1.38306	NID2	Bos taurus nidogen 2 (NID2), mRNA [NM_001102065]	TTGGCCATTACAAGTTCCTGGACATACAAGATGAACATTTTCAGGCAAAAAGACTAAGTA///AAGGTGCTAGAATGTTTCAATTTGTATTTTCTGATCCTGTAAGTCCCTCTATAGGATTAC
A_73_108688|613667	0.00542407	3.08651e-05	down	2.62363	-2.62363	-1.39156	CXCL3	Bos taurus chemokine (C-X-C motif) ligand 3 (CXCL3), mRNA [NM_001046513]	ATGTCTTGCTTGTAAGGCATAATGCCTTGTTTAATGTTTACTATGTGGTGTTTCTCTTTG
A_73_P062676	0.0347808	0.00217194	down	2.65242	-2.65242	-1.40731		Histone H2B type 1 [Source:UniProtKB/Swiss-Prot;Acc:P62808] [ENSBTAT00000033366]	TTACAGGCCTCGTGGAACCCAAAGGCTCTTTTCAGAGCCACCTACCTTTTCTATAAAAGA
A_73_119972|616593	0.0347808	0.00217482	down	2.68895	-2.68895	-1.42705	CYP2C87	Bos taurus cytochrome P450, family 2, subfamily C, polypeptide 87 (CYP2C87), mRNA [NM_001076427]	ATGTGTGCCAATGAGACCTATTTCTCCAGTGCATGTTTTTTCTAATAAAAAGCAGAATCT
A_73_106079|281735	0.00603675	4.60821e-05	down	2.70254	-2.70254	-1.43432	CXCL5	Bos taurus chemokine (C-X-C motif) ligand 5 (CXCL5), mRNA [NM_174300]	GTTAAAATTGTACTTTTTAAATGTATCTCAATGGTTTATAGTGCTTCTTTTGTTCTTTGG
A_73_101167	0.0161562	0.000459881	down	2.71472	-2.71472	-1.4408		AM011365 KN-252-bone-marrow, Bos taurus Bos taurus cDNA clone C0007385o11 5', mRNA sequence [AM011365]	GTTCTTGAAATTTTAGTTTACTAAAGATAGCGTATTAGACTTGCCAACTTACTGCTCAGC
A_73_P134666	0.0135523	0.000314611	down	2.73906	-2.73906	-1.45368			TTCTTACAAATTTAATGCTGATTTTCTGGGTGGACATATGGCATCAGATCAAAAGCACTG
A_73_102018,A_73_P260416,A_73_P388421,A_73_P272576|513197	0.0332077	0.00198971	down	2.7535	-2.7535	-1.46127	CFI	Bos taurus complement factor I (CFI), mRNA [NM_001038096]	AAATACAGGCGGTGTGATGGGACATTTGTTAAAGGTCTCTACAAAGTTTATGCCATTTTG///TGCGTTGTCGAGGATTAGAGACCAGTTTGGCTGAATGTACTTTCACTAAGGGAGTACACA///CTGCTGATATGGATGCAGAAAGAAAATTTACAAAGTCATTTTTGCCTAAACTATCCTGTG///CTCAGCACAACATATAAAACTATGATCTCTCTTCTCTCTACTCTTTTTCTCTCAGGAGCT
A_73_P358236,A_73_112221|535243	0.0171031	0.000520375	down	2.76212	-2.76212	-1.46577	CYP2C18	Bos taurus cytochrome P450, family 2, subfamily C, polypeptide 18 (CYP2C18), mRNA [NM_001076051]	AGAAAGTAAAAGAACCATCAAGCAACTCTGGACATTAACAATCCTCGGGACTTCATCGAT///ATCACTGTAAAACAGAGTGGAATTGTTGGTATAAGCCAACACACAGCCATTTGCTCTCCA
A_73_P049236,A_73_P497818|532777	0.047643	0.00390988	down	2.76612	-2.76612	-1.46786	CLIC2	Bos taurus chloride intracellular channel 2 (CLIC2), mRNA [NM_001081727]	CTACTGTACAAGAAACTCAACTTAATACTCAGTAAAGACCTATATGGGGAAAGAATCCAA///GACATATAGTCATGGTTTCAAACTGTCCCTTAGAGACATTTCCACCTAAATCATTAAAAC
A_73_P495663,A_73_P333976,A_73_P030316,A_73_P252836|506790	0.0354706	0.00225688	down	2.85865	-2.85865	-1.51533	TXNIP	Bos taurus thioredoxin interacting protein (TXNIP), mRNA [NM_001101875]///Rep: MGC154995 protein - Bos taurus (Bovine), partial (51%) [TC422063]	AATGGCCAAACCAAGGTGCTGACGCAGAAGTTGTCATCATTCAGAGGGCAATCATATTAT///TAAAATACTCTTTTTCTTTTCTTCCTCCCAGGTTGATCCCTCCGTCCTGAACAACAATGT///GCTCTACCCTTTTCTGAAAAAGTATGTGGGCTGAAGGTGGTTTCATTTTTTGTTTTTTAA///TCAGATGTAAGCTAAAACTGGTCTACTATGTCTCTAGGGGTAAGCACAATGACAGGGAAA
A_73_P299321,A_73_P192902,A_73_100386,A_73_P415161|514194	0.025978	0.00124407	down	2.86805	-2.86805	-1.52007	CP	Bos taurus ceruloplasmin (CP), mRNA [NM_001256556]	ATGTGACCGAACACATTCATGCCGGAATGGAAACTACTTACACCGTTCTACCAAACGAAG///GACTAGATGTTGTCCTGGACAGTCCTTAAAGGATCACTATTAAAGATTCAATGATTTCAA///ATTTACCATTCCCACATTGATGCTCCAAAAGACATCGCCTCAGGACTCATTGGGCCTTTA///TAAGATGTATTATTCTGCTGTGGATCCCCACAAAGATATATTTACTGGGCTTATCGGGCC
A_73_112510	0.0158871	0.000443077	down	2.96839	-2.96839	-1.56968			GTATCATGACTGAGGTGGCCAGGGAGGCAGGAGAAGCCATTTTTTCCTTGTAGATAAAAA
A_73_P256766,A_73_P031981,A_73_P294986|767827	0.00650951	5.48185e-05	down	2.99486	-2.99486	-1.58249	C1S	Bos taurus complement C1s (C1S), mRNA [NM_001076550]	ACCTCACAATTGTCAAATGCTCAGATGCTCACTGCAGAGAGAGTGTTTATCCATCAAGGA///TGTTTGAAGTTGACCACATCGTTTCTGCTATCTACTTGTAATAAAGCATGTTTATAACCC///AGGTAGGGTTCTGCTCCTGTGGCTGTGTTGGTCTTTCAGTATAATTGGACTAACTACATG
A_73_113566,A_73_P144181,A_73_P063766|613800	0.034549	0.00213379	down	3.00666	-3.00666	-1.58816	ATP2B2	Bos taurus ATPase, Ca++ transporting, plasma membrane 2 (ATP2B2), mRNA [NM_001191245]	TTTTTTAATCTAGACAATAATTGTAAATAAAGAACTCACCATCTCTGTTCATTTAATACT///AACATTAGCAAAGAACAGGAACGTGCCCAGGTCAAGAGACAGTCCAGTGTTGGTTCAAAA///TATGAAGGTCTAGAAAAGCCTGAGTCTCGAACCTCCATCCATAACTTCATGGCTCATCCT
A_73_P093861,A_73_P106856|751790	0.0243506	0.00106058	down	3.05242	-3.05242	-1.60995	UGT1A1	Bos taurus UDP glucuronosyltransferase 1 family, polypeptide A1 (UGT1A1), mRNA [NM_001105636]	CTTGTCCCAAACAGATCTGAATTTGACAGATGCCTAAATTATAGTGACTGGAAAGTATAT///ATGTTCATCACCTTGTCAGAGAGTTTGCTGTGCGATATGGTTTATTCCCCATACGGGCTA
A_73_112495	0.039351	0.00272756	down	3.13156	-3.13156	-1.64688		LB029104.CR.1_E23 GC_BGC-29 Bos taurus cDNA clone IMAGE:8491969, mRNA sequence [EE363946]	AGCTATTAGTATTCATTATGTAGTAGATCCTAACAAAATCATATCATGTATTAAAATTTT
A_73_P388806,A_73_P042756,A_73_P441876|511581	0.00754868	8.1979e-05	down	3.13432	-3.13432	-1.64815	C1R	Bos taurus complement C1r (C1R), mRNA [NM_001034407]	TCTCTATGACTATGTCAAGATTTCTGCTGATAAGAAGACCATGGGGAGGTTCTGTGGGCA///AGTGGAAGACTGACCTCAGGATTGCCTAGGTCAGAATCCAGAGAGCAGTGTATTAAAAAA///ATGATGTGTTTTCTGAAAACATGTTCTGTGCTGGGAACCCAGCCACAAGGCAAGATTCCT
A_73_P031341|525947	0.022407	0.000916468	down	3.18987	-3.18987	-1.6735	LOC525947	Bos taurus serotransferrin-like (LOC525947), mRNA [NM_001046279]	TTCTGCTGGCTGGAACATCCCCATGGGTTTCCTATACAATCAGACTGGGTCATGTAAATT
A_73_P380496,A_73_P275236,A_73_111379,A_73_P102891,A_73_P101151,A_73_P395781,A_73_P478688,A_73_P102201,A_73_P340506,A_73_P305206|280677	0.0117584	0.000230632	down	3.19739	-3.19739	-1.67689	C3	Bos taurus complement C3 (C3), mRNA [NM_001040469]	TGAAGCACCTTATCCAAACCCCCTCCGGCTGTGGGGAGCAGAACATGATTGGTATGACGC///ATGAAACTTGTATCCGCTTCTATCACCCGGATAAAGAGGACGGAATGCTGAGCAAACTCT///CGTGGACTATGTGTACAAGACCAGACTTATCCAGAAGAAGCTGGAAGATGACTTTGACGA///GATGTTCCTGATCACAAGGAGCTGAACCTGGATGTGTCCATCCAACTGCCCAGCCGCAAC///CCCTGGAGCTGGCCAGGAGTGACCTGGATGATGACATAATTCCAGAGGAGGACATCATTT///TTCTACTACATTGATGACCCACATGGCCTGAAGGTCAACATCATTGCCAGGTTCTTGTAC///TTTTTGAAAGACTCCATCACC…
A_73_P094756|521004	0.0251069	0.00113812	down	3.21038	-3.21038	-1.68274	SLC39A10	Bos taurus solute carrier family 39 member 10 (SLC39A10), mRNA [NM_001205880]	GCTCAGTACTGTTTTCCCTGCATGAAGGGGTCTTTTAAAAATAGAAAACTTGTGATAAAG
A_73_101941	0.00542407	2.74597e-05	down	3.78468	-3.78468	-1.92017		Rep: Complement C1s subcomponent precursor (EC 3.4.21.42) (C1 esterase) [Contains: Complement C1s subcomponent heavy chain; Complement C1s subcomponent light chain] - Bos taurus (Bovine), complete [TC392729]	TTTTGGTTTCCCCTTTACCTGTTTGAAGTTGACCACATCGTTTCTGCTATCTACTTGTAA
A_73_111526	0.00842574	0.000110447	down	3.78824	-3.78824	-1.92153		Rep: Complement component 1, r subcomponent - Bos taurus (Bovine), complete [TC417221]	CCCAAGAATTGCACAAGATATATTCCACCATATCTAGGTATCATTGTCCTCTTCCATTTT
A_73_103859|523184	0.0195569	0.000677457	down	4.04695	-4.04695	-2.01684	SOSTDC1	Bos taurus sclerostin domain containing 1 (SOSTDC1), mRNA [NM_001046265]	ATAGGTAACAGTTTCCGATTTAATCTGTGCAATCAGAAGGTGACTAGACCTTCAATGAGT
A_73_119784,A_73_P100926,A_73_P045591|282140	0.0101352	0.000177655	down	4.07821	-4.07821	-2.02794	ANGPT1	Bos taurus angiopoietin 1 (ANGPT1), mRNA [NM_001076797]	AGGGAAGAAACTGTTAAGCTCACTGTGCTTCAAACTACTACTGGATCTTATTTTGGAACT///CTGGAGAATTCATTATCAACCTACAAGCTAGAGAAACAACTTCTTCAACAGACAAATGAA///CAGCGGGACAGAACCATGGAAAACTGAATGGAATAAAATGGCATTATTTCAAAGGGCCCA
A_73_112860,A_73_P049206,A_73_P116396|281658	0.00748857	7.96404e-05	down	6.24707	-6.24707	-2.64318	S100G	Bos taurus S100 calcium binding protein G (S100G), mRNA [NM_174257]///BP109804 ORCS bovine utero-placenta cDNA Bos taurus cDNA clone ORCS13679 3', mRNA sequence [BP109804]	CACCAATGTCACCACTTAATTCTTGACAATTGTAATGATCCAACACTGAGGTCTAATTAC///GGGAAATTCTTTCGAAACTAAACTTTCTCCAATCTTCCAATATTCTTGGTCTTAAGGTTC
