# Supplementary material for: Transcriptomic Analysis of MDBK Cells Infected with Cytopathic and Non-Cytopathic Strains of Bovine Viral Diarrhea Virus (BVDV)
Source: Viruses. 2022 Jun 11;14(6):1276. doi: 10.3390/v14061276 (PMC9228727; doi:10.3390/v14061276)
Supplement: Supplementary file 1 [file viruses-14-01276-s001.zip › Table S6_GO enrichment results of the DEGs 24h p.i. with cp strain.xlsx]

## Sheet: Arkusz1
Enrichment results of GO by genes with increased expression 24h p.i. with strain cp
Category	Term	Count	%	PValue	Genes	List Total	Pop Hits	Pop Total	Fold Enrichment
GOTERM_BP_DIRECT	GO:0051301~cell division	60	3.52113	2.1661e-22	ERCC6L, CCNF, SMC3, CKS1B, BABAM1, PPP1CC, SEPT6, CDC23, CCND2, PTTG1, CCND1, CNTRL, SPDL1, VRK1, MASTL, CDC25C, CDC40, CDC25A, HAUS1, CCNA2, ASPM, PSRC1, KIF2A, CCNE2, CKS2, BIRC5, SEH1L, CDCA2, CDCA3, MIS12, SKA3, ARPP19, PMF1, NCAPH, SKA1, SKA2, AURKA, CCNB2, FZR1, DSN1, CCNB1, RAD21, MCMBP, BUB3, FAM83D, SEPT10, UBE2C, CDC6, ZWINT, MAD2L2, NEDD1, TPX2, MIS18A, REEP4, UBE2S, CDK2, CDK1, SPC24,…	1343	150	13824	4.11735
GOTERM_BP_DIRECT	GO:0007067~mitotic nuclear division	38	2.23005	9.39853e-13	ERCC6L, CDCA2, CCNF, SKA3, ARPP19, PMF1, SKA1, SKA2, BABAM1, CCNB2, PTTG1, RAD21, NUF2, MCMBP, FAM83D, CENPW, PLK1, VRK1, CDC25C, MASTL, ZWINT, GEM, CDC25A, HAUS1, CCNA2, MAD2L2, ASPM, NEDD1, WEE1, SNX18, MIS18A, REEP4, CDK2, CDK1, CENPN, SPC24, SPC25	1343	105	13824	3.72522
GOTERM_BP_DIRECT	GO:0007049~cell cycle	29	1.70188	3.85448e-08	SUV39H2, SMARCB1, MCM7, UHRF1, MCM8, SUV39H1, DIXDC1, BRCA1, LIN9, PPP1CC, RGS2, SEPT6, CHAF1A, CCND2, PIM1, LIN52, SEPT10, HACE1, CKAP2, RAB11A, THAP1, RBL2, CDK6, RBL1, CCNE2, NASP, MCM5, MCM6, MNAT1	1343	94	13824	3.17562
GOTERM_BP_DIRECT	GO:0006281~DNA repair	32	1.87793	4.89419e-08	SMARCB1, PARPBP, PAXIP1, UHRF1, DOT1L, NUDT1, FAAP24, BRCA1, SMC3, RDM1, CHAF1A, PTTG1, CHEK1, RUVBL1, USP1, PRMT6, FANCL, HUS1, WRNIP1, KIF22, UBE2A, UCHL5, NSMCE4A, FANCD2, UBE2T, DMC1, CDK2, MNAT1, RAD18, ASF1A, RAD9A	1343	112	13824	2.94096
GOTERM_BP_DIRECT	GO:0006270~DNA replication initiation	13	0.762911	8.53666e-08	MCM7, GINS4, MCM10, CDC6, POLA1, POLA2, ORC6, CDC45, CCNE2, MCM4, MCM5, MCM6, TOPBP1	1343	21	13824	6.37209
GOTERM_BP_DIRECT	GO:0000070~mitotic sister chromatid segregation	12	0.704225	1.15975e-07	CEP57, KIF18A, DSN1, KIF18B, ESPL1, SPAG5, PLK1, MIS12, CDCA8, NEK2, BUB3, KNSTRN	1343	18	13824	6.86225
GOTERM_BP_DIRECT	GO:0007059~chromosome segregation	17	0.997653	3.36211e-06	CENPT, CENPW, HJURP, BRCA1, KIF11, SKA3, PMF1, KNSTRN, SKA1, SKA2, MIS18A, BIRC5, CENPN, NEK2, OIP5, SLC25A5, SPC25	1343	46	13824	3.80407
GOTERM_BP_DIRECT	GO:0000082~G1/S transition of mitotic cell cycle	15	0.880282	1.26627e-05	CDKN2D, RANBP1, PLK3, CDKN1A, CDKN2C, IQGAP3, CCNE2, CCND1, CDK2, EIF4EBP1, PIM2, CRLF3, POLE, CDKN3	1343	40	13824	3.86001
GOTERM_BP_DIRECT	GO:0000086~G2/M transition of mitotic cell cycle	12	0.704225	2.08023e-05	CDKN1A, CHEK2, PLK1, CHEK1, USH1C, BIRC5, CALM3, CDC25C, MASTL, FOXM1, ARPP19, NES	1343	27	13824	4.57483
GOTERM_BP_DIRECT	GO:0071479~cellular response to ionizing radiation	11	0.64554	6.00049e-05	NET1, BLM, CDKN1A, RAD51, GADD45A, FIGNL1, HUS1, ECT2, TP53, RAD9A, RHNO1	1343	25	13824	4.52908
GOTERM_BP_DIRECT	GO:0043065~positive regulation of apoptotic process	29	1.70188	6.36806e-05	TOP2A, RARG, BCL2A1, TNF, SAV1, NEUROD1, SYCE3, BCL2L11, AIFM2, C1QBP, SUDS3, BID, ECT2, SOX4, BARD1, GADD45A, BNIP3, OSGIN1, HMGA2, DUSP6, GADD45G, NET1, MLLT11, NR4A1, BMP2, IL6, MELK, NUPR1, ATF4	1343	133	13824	2.24442
GOTERM_BP_DIRECT	GO:0007051~spindle organization	8	0.469484	8.10761e-05	RANBP1, ASPM, SPAG5, CEP72, AUNIP, CKAP5, KNSTRN	1343	13	13824	6.33438
GOTERM_BP_DIRECT	GO:0007080~mitotic metaphase plate congression	12	0.704225	9.37622e-05	KIF18A, CCNB1, PSRC1, SEH1L, CDC23, KIFC1, PINX1, CDCA8, KIF2C, KIF22, SPDL1, RAB11A	1343	31	13824	3.98453
GOTERM_BP_DIRECT	GO:0042127~regulation of cell proliferation	30	1.76056	0.000141609	CD40, DNMT1, CXCL8, SRC, CDCA7, TNFRSF11B, CXCL3, SAT1, CXCL5, HHEX, PLAU, CHEK1, ABL2, E2F4, BID, JAK2, RELT, TFAP2B, EGLN3, FANCL, TNFRSF9, FANCA, PLA2G4A, LOC510798, NFKBIA, CCDC88A, RPA3, SGK3, SGK2, EZH2	1343	146	13824	2.11508
GOTERM_BP_DIRECT	GO:0034475~U4 snRNA 3'-end processing	6	0.352113	0.000152043	EXOSC7, EXOSC5, EXOSC9, EXOSC8, EXOSC3, EXOSC2	1343	7	13824	8.82289
GOTERM_BP_DIRECT	GO:0007052~mitotic spindle organization	10	0.586854	0.000172616	STIL, CCNB1, KIF2A, STMN1, WDR62, SMC3, AURKB, NDC80, AURKA, SPC25	1343	23	13824	4.47538
GOTERM_BP_DIRECT	GO:0051028~mRNA transport	10	0.586854	0.000252535	SLBP, NXT1, SEH1L, ALYREF, MAGOH, SRSF3, NUTF2, NXT2, MAGOHB, QKI	1343	24	13824	4.28891
GOTERM_BP_DIRECT	GO:0006260~DNA replication	16	0.938967	0.000317227	RMI2, RMI1, MCM8, RPA2, WRNIP1, BRCA1, RECQL4, POLD3, POLA2, CHAF1A, NASP, ORC1, POLD1, RPA3, DNA2, POLE	1343	58	13824	2.83955
GOTERM_BP_DIRECT	GO:0006284~base-excision repair	11	0.64554	0.000350998	RECQL4, NEIL3, FEN1, LIG1, RPA3, HMGA1, XRCC1, HMGA2, RPA2, DNA2, HMGB1	1343	30	13824	3.77424
GOTERM_BP_DIRECT	GO:0000467~exonucleolytic trimming to generate mature 3'-end of 5.8S rRNA from tricistronic rRNA transcript (SSU-rRNA, 5.8S rRNA, LSU-rRNA)	6	0.352113	0.000372919	EXOSC7, EXOSC9, ERI2, EXOSC8, EXOSC3, EXOSC2	1343	8	13824	7.72003
GOTERM_BP_DIRECT	GO:0034501~protein localization to kinetochore	6	0.352113	0.000372919	MTBP, MIS12, CDK1, BUB1B, SPDL1, AURKB	1343	8	13824	7.72003
GOTERM_BP_DIRECT	GO:0034427~nuclear-transcribed mRNA catabolic process, exonucleolytic, 3'-5'	6	0.352113	0.000372919	EXOSC7, EXOSC5, EXOSC9, EXOSC8, EXOSC3, EXOSC2	1343	8	13824	7.72003
GOTERM_BP_DIRECT	GO:0071038~nuclear polyadenylation-dependent tRNA catabolic process	5	0.293427	0.000408018	EXOSC7, EXOSC9, EXOSC8, EXOSC3, EXOSC2	1343	5	13824	10.2934
GOTERM_BP_DIRECT	GO:0007265~Ras protein signal transduction	11	0.64554	0.000473491	CCNA2, RASSF1, RALA, DNMT1, CDKN1A, CDK2, RRAS2, MAPKAPK5, KRAS, TP53, IQGAP3	1343	31	13824	3.65249
GOTERM_BP_DIRECT	GO:0006310~DNA recombination	10	0.586854	0.00050471	RECQL4, RDM1, NSMCE4A, PAXIP1, LIG1, RUVBL1, HMGB2, HMGB3, HMGB1, UCHL5	1343	26	13824	3.95899
GOTERM_BP_DIRECT	GO:0000398~mRNA splicing, via spliceosome	20	1.17371	0.000567988	SNRPN, RBM15, LSM5, LSM3, CDC40, LSM2, LSM7, LSM6, DDX39A, SYF2, RSRC1, TRA2B, RAVER2, SNRPE, SNRPA1, SNRPF, TXNL4A, SNRPA, BCAS2, SNRPB	1343	87	13824	2.36629
GOTERM_BP_DIRECT	GO:0043928~exonucleolytic nuclear-transcribed mRNA catabolic process involved in deadenylation-dependent decay	6	0.352113	0.000771922	EXOSC7, EXOSC5, EXOSC9, EXOSC8, EXOSC3, EXOSC2	1343	9	13824	6.86225
GOTERM_BP_DIRECT	GO:0000724~double-strand break repair via homologous recombination	15	0.880282	0.000871818	GEN1, BLM, MCM8, H2AFX, TONSL, RPA2, HUS1, NUCKS1, BRCA1, PALB2, RAD54B, RAD51, RNF138, RPA3, RAD54L	1343	57	13824	2.70878
GOTERM_BP_DIRECT	GO:0090307~mitotic spindle assembly	10	0.586854	0.000933473	TPX2, KIF2A, KIFC1, CHEK2, BIRC5, MYBL2, NEK2, KIF11, MZT1, RAB11A	1343	28	13824	3.6762
GOTERM_BP_DIRECT	GO:0001578~microtubule bundle formation	9	0.528169	0.000999417	TPPP3, PSRC1, PRC1, MTCL1, MAP1B, PLK1, CHP1, KIF20A, TPPP	1343	23	13824	4.02784
GOTERM_BP_DIRECT	GO:0051988~regulation of attachment of spindle microtubules to kinetochore	5	0.293427	0.00112957	RACGAP1, SPAG5, NEK2, ECT2, KNSTRN	1343	6	13824	8.57781
GOTERM_BP_DIRECT	GO:0071035~nuclear polyadenylation-dependent rRNA catabolic process	5	0.293427	0.00112957	EXOSC7, EXOSC9, EXOSC8, EXOSC3, EXOSC2	1343	6	13824	8.57781
GOTERM_BP_DIRECT	GO:0090200~positive regulation of release of cytochrome c from mitochondria	8	0.469484	0.00141121	MLLT11, BCL2L11, BNIP3, PLAUR, CIDEB, BID, TP53, MMP9	1343	19	13824	4.33405
GOTERM_BP_DIRECT	GO:0007018~microtubule-based movement	14	0.821596	0.0019203	DNHD1, KIF24, KIF22, KIF11, KIF15, KIF18A, KIF18B, KIF2A, KIFC1, KIF4A, KIF2C, KIF3C, KIF20A, KIF20B	1343	55	13824	2.62013
GOTERM_BP_DIRECT	GO:0007131~reciprocal meiotic recombination	8	0.469484	0.00199094	SYCE3, RAD51, MSH2, XRCC2, DMC1, MND1, TRIP13, CCNB1IP1	1343	20	13824	4.11735
GOTERM_BP_DIRECT	GO:0006342~chromatin silencing	10	0.586854	0.00208701	LOC104975684, H2AFZ, LOC524236, H2AFX, HIST2H2AB, LOC614970, H2AFV, HIST1H2AG, HIST1H2AC, HIST2H2AC	1343	31	13824	3.32044
GOTERM_BP_DIRECT	GO:0032496~response to lipopolysaccharide	18	1.05634	0.00227322	AKIRIN2, CD40, CXCL8, GCH1, TNFRSF9, F2R, HMGB2, TNFRSF11B, LOC510798, CXCL3, CXCL5, NFKBIA, DUSP10, MAPKAPK3, SLPI, NOCT, CCR7, RELT	1343	83	13824	2.2323
GOTERM_BP_DIRECT	GO:0007095~mitotic G2 DNA damage checkpoint	6	0.352113	0.00239714	BLM, MRE11, SYF2, CDK1, HMGA2, TOPBP1	1343	11	13824	5.61457
GOTERM_BP_DIRECT	GO:1900264~positive regulation of DNA-directed DNA polymerase activity	5	0.293427	0.00243294	RFC5, RFC4, RFC2, DSCC1, CHTF18	1343	7	13824	7.35241
GOTERM_BP_DIRECT	GO:0071356~cellular response to tumor necrosis factor	14	0.821596	0.00317686	CXCL8, CCL20, BRCA1, SLC2A4, GATA3, NPNT, YBX3, CX3CL1, BAG4, IL6, CCL5, ZC3H12A, CCL3, CCL17	1343	58	13824	2.48461
GOTERM_BP_DIRECT	GO:0045143~homologous chromosome segregation	4	0.234742	0.00338671	ESPL1, PTTG1, PLK1	1343	4	13824	10.2934
GOTERM_BP_DIRECT	GO:0046602~regulation of mitotic centrosome separation	4	0.234742	0.00338671	CHEK1, NEK2, KIF11, CEP85	1343	4	13824	10.2934
GOTERM_BP_DIRECT	GO:0045746~negative regulation of Notch signaling pathway	8	0.469484	0.00368503	NFKBIA, DLX1, HEY1, SLC35C1, C27H8ORF4, CHAC1, GATA2, DLK2	1343	22	13824	3.74304
GOTERM_BP_DIRECT	GO:0006357~regulation of transcription from RNA polymerase II promoter	38	2.23005	0.00414116	URI1, ENY2, SMARCB1, CBFB, CITED4, HMGB2, HMGB1, NRF1, ELK3, RELB, MED30, ELMSAN1, MYB, RUVBL1, MYBL2, ZNF367, MYBL1, ETV1, DEK, SOD2, ETV4, TRERF1, ETV5, NFKB1, NFKB2, RBL2, TFDP1, TFDP2, SP4, MED20, MAFF, CKS2, TCEA1, NUPR1, ANKRA2, MNAT1, ATF4	1343	244	13824	1.60307
GOTERM_BP_DIRECT	GO:0060326~cell chemotaxis	12	0.704225	0.00453429	DOCK4, M-SAA3.2, CCL20, SAA3, HMGB2, SAA2, PRKCQ, ARRB2, GRO1, CXCL3, CXCL5, EPHA2	1343	47	13824	2.6281
GOTERM_BP_DIRECT	GO:0051865~protein autoubiquitination	12	0.704225	0.00453429	RNF115, UHRF1, UBE2T, TRIM13, BRCA1, UBE2A, MARCH5, RNF141, RAD18, RNF187, DDB2, RNF41	1343	47	13824	2.6281
GOTERM_BP_DIRECT	GO:0006335~DNA replication-dependent nucleosome assembly	7	0.410798	0.00550985	CHAF1B, CHAF1A, NASP, LOC530773, HAT1, ASF1A, ASF1B	1343	18	13824	4.00298
GOTERM_BP_DIRECT	GO:0043525~positive regulation of neuron apoptotic process	7	0.410798	0.00550985	TFAP2B, BCL2L11, DDIT3, CCL3, TP53, RAPSN, ATF4	1343	18	13824	4.00298
GOTERM_BP_DIRECT	GO:0060707~trophoblast giant cell differentiation	6	0.352113	0.00566091	PLK4, GJB5, LIF, PLG, MDFI, E2F8	1343	13	13824	4.75079
GOTERM_BP_DIRECT	GO:0000281~mitotic cytokinesis	8	0.469484	0.00629587	SNX18, RACGAP1, STMN1, PLK1, NUSAP1, CKAP2, KIF20A, CEP55	1343	24	13824	3.43112
GOTERM_BP_DIRECT	GO:0007346~regulation of mitotic cell cycle	8	0.469484	0.00629587	RPA3, CKS2, PIM1, BIRC5, PIM2, SAE1, CKS1B, THAP1	1343	24	13824	3.43112
GOTERM_BP_DIRECT	GO:0000278~mitotic cell cycle	8	0.469484	0.00629587	CENPT, CENPF, TFDP1, TFDP2, XRCC2, MYB, CNTRL, E2F4	1343	24	13824	3.43112
GOTERM_BP_DIRECT	GO:0008283~cell proliferation	25	1.46714	0.00648539	USP13, DAZAP1, MRE11, KDM1A, MCM7, MCM10, CKS1B, ZFP36L1, GNG2, PIM1, POC1B, FAM83D, E2F8, BOK, ENTPD5, BYSL, POLA1, NASP, DDIT4, GNB1, TACC3, CDK1, BCL2, CKS2, POLR3G	1343	145	13824	1.77472
GOTERM_BP_DIRECT	GO:0006351~transcription, DNA-templated	78	4.57746	0.00727868	DIDO1, SUV39H2, RARG, GABPB2, SMARCB1, SUV39H1, CITED4, HMGB2, BHLHE41, FHL2, HMGB3, BRCA1, LIMD1, LBH, HEY1, CCND1, SNAPC3, C1QBP, MYB, RUVBL1, KMT5B, ZNF567, LIN52, TEAD4, PRMT6, NCOA3, CSNK2A2, FOXP4, ILF2, UCHL5, MED28, COMMD5, THAP1, TFDP1, TFDP2, IRF1, BIRC5, TRIB3, ASF1A, ASF1B, DNMT1, URI1, ZBTB8A, HDAC2, PAXIP1, EPAS1, UHRF1, CEBPG, CDCA7, LIN9, NLK, HDAC8, PMF1, NEUROD1, SEC14L2, E2F1, …	1343	603	13824	1.33148
GOTERM_BP_DIRECT	GO:0032508~DNA duplex unwinding	7	0.410798	0.00740152	GINS1, RECQL4, GINS2, GINS4, MCM5, DNA2, MCM6	1343	19	13824	3.7923
GOTERM_BP_DIRECT	GO:0010212~response to ionizing radiation	10	0.586854	0.00758029	BABAM1, PAXIP1, RAD51, RFWD3, XRCC2, DMC1, RAD54L, BRCA1, TOPBP1, RAD54B	1343	37	13824	2.78199
GOTERM_BP_DIRECT	GO:0034080~CENP-A containing nucleosome assembly	4	0.234742	0.00785474	MIS18A, HJURP, OIP5, CENPP	1343	5	13824	8.2347
GOTERM_BP_DIRECT	GO:2001240~negative regulation of extrinsic apoptotic signaling pathway in absence of ligand	8	0.469484	0.00802516	CSF2, GDNF, IL7, STRADB, BCL2, SGK3, TNF, CX3CL1	1343	25	13824	3.29388
GOTERM_BP_DIRECT	GO:0007094~mitotic spindle assembly checkpoint	6	0.352113	0.00811065	PLK1, BUB1B, BUB3, LOC780876, BUB1, MAD2L1	1343	14	13824	4.41145
GOTERM_BP_DIRECT	GO:0051297~centrosome organization	8	0.469484	0.0100804	HAUS8, XRCC2, PLK1, BNIP2, HAUS6, CKAP5, SSX2IP, HAUS1	1343	26	13824	3.16719
GOTERM_BP_DIRECT	GO:0043491~protein kinase B signaling	8	0.469484	0.0100804	TMEM100, CD40, CCL5, SESN2, CCL3, ILK, TNF, EPHA2	1343	26	13824	3.16719
GOTERM_BP_DIRECT	GO:0008285~negative regulation of cell proliferation	33	1.93662	0.0109012	RARG, CDKN1A, SMARCB1, BTG1, SERPINE2, GATA3, RBPJ, GLI3, MTBP, C24H18ORF54, FTH1, PIM2, MSX1, SOX4, NTRK1, CDKN2D, TFAP2B, CDKN2C, TNFRSF9, F2R, LIF, HMGA1, VEGFC, KLF4, EREG, RNF41, BMP2, ZEB1, DLC1, IRF1, SPRY2, SPRY1, NF2	1343	217	13824	1.56535
GOTERM_BP_DIRECT	GO:0006261~DNA-dependent DNA replication	5	0.293427	0.0115026	RFC5, RFC4, RFC2, POLE2, MCMBP	1343	10	13824	5.14669
GOTERM_BP_DIRECT	GO:0048485~sympathetic nervous system development	5	0.293427	0.0115026	NTRK1, TFAP2B, GDNF, GATA3, SOX4	1343	10	13824	5.14669
GOTERM_BP_DIRECT	GO:0051384~response to glucocorticoid	5	0.293427	0.0115026	IL1RN, IL6, BCL2, HMGB1, TNF	1343	10	13824	5.14669
GOTERM_BP_DIRECT	GO:0072593~reactive oxygen species metabolic process	8	0.469484	0.0124937	GLS2, BNIP3, SESN2, DDIT4, NDUFAF2, BCL2, VAV1, DRD5	1343	27	13824	3.04989
GOTERM_BP_DIRECT	GO:0000077~DNA damage checkpoint	7	0.410798	0.0125129	DOT1L, PEA15, H2AFX, E2F1, HUS1, RAD9A, RHNO1	1343	21	13824	3.43112
GOTERM_BP_DIRECT	GO:0000122~negative regulation of transcription from RNA polymerase II promoter	56	3.28638	0.0132573	FOXA1, SUV39H2, RARG, KDM1A, SUV39H1, FHL2, RBPJ, FOXM1, TNF, GLI3, CCND1, C1QBP, MYB, WWC3, ZNF567, CIC, PRMT6, TLE4, LOC504599, OSR2, RBM15, FST, OVOL1, RBL1, DDIT3, EZR, TP53, MDFI, DLX1, DNMT1, URI1, HDAC2, UHRF1, GATA3, GATA2, AURKB, RELB, NFIL3, E2F1, SUDS3, E2F8, TFAP2B, PLK3, BCL11A, PLK1, HMGA2, NFKB1, NFKB2, NR4A2, MAD2L2, BMP2, PKIA, ID1, ID3, PKIG, RCOR2	1343	420	13824	1.37245
GOTERM_BP_DIRECT	GO:0043066~negative regulation of apoptotic process	36	2.11268	0.0136624	RARG, MRE11, BCL2A1, AMIGO2, FHL2, GLI3, AQP1, AURKA, INSL6, PIM1, PIM2, MSX1, IER3, BARD1, TFAP2B, PLK3, SERPINB2, BNIP3, PLK1, ASNS, HMGA2, PALB2, VEGFA, IL6, IL7, CTH, ID1, CDK1, BCL2, BIRC5, SPRY2, TP53, CARD14, NAIP, STK40	1343	246	13824	1.50635
GOTERM_BP_DIRECT	GO:0030308~negative regulation of cell growth	16	0.938967	0.0145035	CDKN2D, CDA, CDKN1A, CDKN2C, SERPINE2, OSGIN1, OSGIN2, PSRC1, NOV, SERTAD2, GNG4, SESN2, BCL2, MSX1, CRLF3, TP53	1343	84	13824	1.96064
GOTERM_BP_DIRECT	GO:0060426~lung vasculature development	4	0.234742	0.0145799	ERRFI1, ID1, LIF, STRA6	1343	6	13824	6.86225
GOTERM_BP_DIRECT	GO:2001243~negative regulation of intrinsic apoptotic signaling pathway	7	0.410798	0.0158233	HELLS, URI1, SRC, FIGNL1, BCL2, PLAUR, MMP9	1343	22	13824	3.27516
GOTERM_BP_DIRECT	GO:0032147~activation of protein kinase activity	7	0.410798	0.0158233	TPX2, CALCB, STRADB, HMGB1, CLSPN, ECT2, VEGFA	1343	22	13824	3.27516
GOTERM_BP_DIRECT	GO:0007019~microtubule depolymerization	5	0.293427	0.0167057	KIF18A, KIF18B, STMN1, KIF24, KIF2C	1343	11	13824	4.67881
GOTERM_BP_DIRECT	GO:1900745~positive regulation of p38MAPK cascade	5	0.293427	0.0167057	BMP2, GADD45A, ZC3H12A, XDH, GADD45G	1343	11	13824	4.67881
GOTERM_BP_DIRECT	GO:0002548~monocyte chemotaxis	8	0.469484	0.0185181	LGALS3, FLT1, CALCB, CCL20, CCL5, CCL3, CCL17, CX3CL1	1343	29	13824	2.83955
GOTERM_BP_DIRECT	GO:2000379~positive regulation of reactive oxygen species metabolic process	6	0.352113	0.0196175	CDKN1A, GADD45A, ZC3H12A, TP53, XDH, RNF41	1343	17	13824	3.63296
GOTERM_BP_DIRECT	GO:0007017~microtubule-based process	9	0.528169	0.0198664	TUBA1C, TUBA3E, TUBB6, TUBA1A, TUBB, NEK2, TUBE1, TUBB4B, TUBB4A	1343	36	13824	2.57334
GOTERM_BP_DIRECT	GO:0008630~intrinsic apoptotic signaling pathway in response to DNA damage	9	0.528169	0.0198664	BCL2L11, BCL2A1, CHEK2, E2F1, BCL2, BRCA1, TNF, BOK, EPHA2	1343	36	13824	2.57334
GOTERM_BP_DIRECT	GO:0000910~cytokinesis	8	0.469484	0.0221873	RALA, AHCTF1, PRC1, BIRC5, KIF20A, ECT2, RAB11A, CIT	1343	30	13824	2.7449
GOTERM_BP_DIRECT	GO:0018105~peptidyl-serine phosphorylation	19	1.11502	0.0222672	HIPK4, MAST3, MAST2, PLK1, ILK, VRK1, MASTL, MAPKAPK3, CDK2, MKNK2, CDK1, BCL2, MAPKAPK5, SGK3, PRKCQ, PKN2, CLSPN, STK32A, SGK2	1343	112	13824	1.7462
GOTERM_BP_DIRECT	GO:0008584~male gonad development	11	0.64554	0.0229957	ASPM, INSL6, BCL2L11, MSH2, HMGB2, BCL2, FANCA, HMGA2, GATA3, NUPR1, YBX3	1343	51	13824	2.22014
GOTERM_BP_DIRECT	GO:0007076~mitotic chromosome condensation	5	0.293427	0.023167	NUSAP1, PHF13, NCAPG, SMC4, NCAPH	1343	12	13824	4.28891
GOTERM_BP_DIRECT	GO:0007062~sister chromatid cohesion	5	0.293427	0.023167	MRE11, RAD21, MCMBP, KIF22, HDAC8	1343	12	13824	4.28891
GOTERM_BP_DIRECT	GO:0043154~negative regulation of cysteine-type endopeptidase activity involved in apoptotic process	10	0.586854	0.0234132	CDKN2D, TFAP2B, NR4A1, TNFAIP8, SRC, SIAH2, BIRC5, KLF4, CD44, NAIP	1343	44	13824	2.3394
GOTERM_BP_DIRECT	GO:0006302~double-strand break repair	10	0.586854	0.0234132	BABAM1, RECQL4, MAD2L2, MSH2, CHEK2, TDP1, RAD21, SMARCA5, MND1, TRIP13	1343	44	13824	2.3394
GOTERM_BP_DIRECT	GO:0070098~chemokine-mediated signaling pathway	10	0.586854	0.0234132	CXCL8, CCL20, CCL5, CCL3, CXCR4, CCR7, CXCL3, CCL17, CXCL5, CX3CL1	1343	44	13824	2.3394
GOTERM_BP_DIRECT	GO:0009615~response to virus	10	0.586854	0.0234132	BATF3, URI1, CDK6, NPC2, CCL5, STMN1, HMGA1, GATA3, PIM2, TNF	1343	44	13824	2.3394
GOTERM_BP_DIRECT	GO:0006915~apoptotic process	30	1.76056	0.023419	PPP1R15A, CLIC4, TNFAIP8, CDCA7, ZFP36L1, LGALS1, RAD21, C1QBP, ZC3H12A, PIM1, BNIP2, SUDS3, BCL2L14, BCL2L15, EGLN3, TNFRSF9, SIAH2, CSNK2A2, CKAP2, TICAM1, GADD45G, NR4A1, TPX2, DLC1, IRF1, DDIT3, C27H8ORF4, CDK1, BIRC5, TP53	1343	204	13824	1.51373
GOTERM_BP_DIRECT	GO:0006999~nuclear pore organization	4	0.234742	0.0236901	NDC1, NUP205, SEH1L, NUP54	1343	7	13824	5.88193
GOTERM_BP_DIRECT	GO:0051310~metaphase plate congression	4	0.234742	0.0236901	CENPF, KIF22, FAM83D, GEM	1343	7	13824	5.88193
GOTERM_BP_DIRECT	GO:1904668~positive regulation of ubiquitin protein ligase activity	4	0.234742	0.0236901	CDC20, FZR1, UBE2S, PLK1	1343	7	13824	5.88193
GOTERM_BP_DIRECT	GO:0031145~anaphase-promoting complex-dependent catabolic process	4	0.234742	0.0236901	CDC20, FZR1, UBE2C, UBE2S	1343	7	13824	5.88193
GOTERM_BP_DIRECT	GO:0031571~mitotic G1 DNA damage checkpoint	4	0.234742	0.0236901	CCND1, RFWD3, RPA2, TP53	1343	7	13824	5.88193
GOTERM_BP_DIRECT	GO:0071028~nuclear mRNA surveillance	4	0.234742	0.0236901	EXOSC7, EXOSC5, EXOSC9, EXOSC8	1343	7	13824	5.88193
GOTERM_BP_DIRECT	GO:0006268~DNA unwinding involved in DNA replication	4	0.234742	0.0236901	TOP2A, RAD51, MCM7, MCM6	1343	7	13824	5.88193
GOTERM_BP_DIRECT	GO:0042308~negative regulation of protein import into nucleus	4	0.234742	0.0236901	MDFIC, PKIA, CHP1, PKIG	1343	7	13824	5.88193
GOTERM_BP_DIRECT	GO:0085020~protein K6-linked ubiquitination	4	0.234742	0.0236901	BARD1, UBE2S, UBE2T, BRCA1	1343	7	13824	5.88193
GOTERM_BP_DIRECT	GO:0031110~regulation of microtubule polymerization or depolymerization	4	0.234742	0.0236901	STMN1, SKA3, SKA1, SKA2	1343	7	13824	5.88193
GOTERM_BP_DIRECT	GO:0043524~negative regulation of neuron apoptotic process	16	0.938967	0.0237401	NTRK1, DLX1, TFAP2B, XRCC2, F2R, NGF, NR4A2, MT2A, MSH2, GDNF, DNAJC5, BCL2, BIRC5, KRAS, NES, AARS	1343	89	13824	1.85049
GOTERM_BP_DIRECT	GO:0006366~transcription from RNA polymerase II promoter	21	1.23239	0.0237916	TFAP2B, OSR2, LMO4, BCL11A, CEBPG, ETV1, NUCKS1, HSF2BP, ARRB2, GATA3, RBPJ, OVOL1, NR4A2, NR4A1, NFIL3, RAD21, MAFF, MNAT1, TP53, RBMX, POLR2K	1343	129	13824	1.67567
GOTERM_BP_DIRECT	GO:0000387~spliceosomal snRNP assembly	7	0.410798	0.0241584	SNRPD1, GEMIN2, GEMIN5, SNRPE, SNRPF, SNRPD3, SNRPB	1343	24	13824	3.00223
GOTERM_BP_DIRECT	GO:0006611~protein export from nucleus	6	0.352113	0.0250435	HSPA9, NXT1, STRADB, CHP1, NUTF2, CCHCR1	1343	18	13824	3.43112
GOTERM_BP_DIRECT	GO:0001656~metanephros development	6	0.352113	0.0250435	OSR2, IRX3, BCL2, ID3, SPRY1, GLI3	1343	18	13824	3.43112
GOTERM_BP_DIRECT	GO:0006338~chromatin remodeling	11	0.64554	0.0260777	RERE, FOXA1, SUV39H2, CHRAC1, SMARCB1, MYB, RUVBL1, HMGB2, GATA3, HMGB1, DEK	1343	52	13824	2.17744
GOTERM_BP_DIRECT	GO:0034473~U1 snRNA 3'-end processing	3	0.176056	0.0264271	EXOSC7, EXOSC9, EXOSC8	1343	3	13824	10.2934
GOTERM_BP_DIRECT	GO:0032367~intracellular cholesterol transport	3	0.176056	0.0264271	ABCA1, NPC2, ABCG1	1343	3	13824	10.2934
GOTERM_BP_DIRECT	GO:0031577~spindle checkpoint	3	0.176056	0.0264271	BIRC5, SPDL1, AURKB	1343	3	13824	10.2934
GOTERM_BP_DIRECT	GO:0034476~U5 snRNA 3'-end processing	3	0.176056	0.0264271	EXOSC7, EXOSC9, EXOSC8	1343	3	13824	10.2934
GOTERM_BP_DIRECT	GO:0070936~protein K48-linked ubiquitination	10	0.586854	0.0268295	ZNRF1, RNF115, HACE1, UBE2C, UBE2Q2, UBE2T, TNFAIP3, UBE2D1, UBE2A, RNF187	1343	45	13824	2.28742
GOTERM_BP_DIRECT	GO:0006954~inflammatory response	31	1.81925	0.0269415	CD40, CXCL8, CALCB, TUSC2, TNFRSF11B, HMGB1, MEFV, CXCL3, GRO1, CXCL5, CX3CL1, RELB, CCL5, CCL3, OLR1, CCR7, JAK2, CCL17, RELT, GGT5, CCL20, TNFRSF9, F2R, IL18, LOC510798, TICAM1, NFKB1, NFKB2, BMP2, HIST1H2BA, EPHA2	1343	215	13824	1.48416
GOTERM_BP_DIRECT	GO:0045931~positive regulation of mitotic cell cycle	7	0.410798	0.029253	FOXA1, CCNB1, EIF4EBP1, ASNS, BIRC5, PKN2, CDC25B	1343	25	13824	2.88214
GOTERM_BP_DIRECT	GO:0051726~regulation of cell cycle	13	0.762911	0.0293845	GADD45A, SRC, DOT1L, MASTL, GADD45G, RBL2, RBL1, CCNE2, FIGNL1, CDK2, TRIM36, PRR11, CLIC1	1343	68	13824	1.96785
GOTERM_BP_DIRECT	GO:0010569~regulation of double-strand break repair via homologous recombination	5	0.293427	0.0309475	RAD51, KDM1A, FIGNL1, CHEK1, RPA2	1343	13	13824	3.95899
GOTERM_BP_DIRECT	GO:0009887~organ morphogenesis	8	0.469484	0.0309694	IL7, GMNN, VEGFC, GATA3, E2F4, PHLDA2, GATA2, PALB2	1343	32	13824	2.57334
GOTERM_BP_DIRECT	GO:0034644~cellular response to UV	8	0.469484	0.0309694	PCNA, KDM1A, POLD1, TP53, AURKB, CDC25A, AQP1, RHNO1	1343	32	13824	2.57334
GOTERM_BP_DIRECT	GO:0031572~G2 DNA damage checkpoint	6	0.352113	0.0313442	BABAM1, FZR1, PLK1, CHEK1, BRCA1, CLSPN	1343	19	13824	3.25054
GOTERM_BP_DIRECT	GO:0045944~positive regulation of transcription from RNA polymerase II promoter	71	4.16667	0.0319808	TOP2A, RARG, CD40, CSF3, GABPB2, SMARCB1, KDM1A, CITED4, HMGB2, NUCKS1, HMGB1, BRCA1, GLI1, FOXM1, TNF, GLI3, HHEX, ZC3H12A, MYB, NCK2, SPX, ZNF567, SOX4, OSR2, H2AFZ, LMO4, NCOA3, CKAP2, ETV1, ETV4, KLF15, PYGO1, ZEB1, ARHGEF2, TP53, RHOQ, ATF4, HDAC2, CBFB, EPAS1, CEBPG, ADRB2, GATA3, BHLHE23, HOXD10, RELB, RAD21, CCL3, E2F1, E2F8, AKIRIN2, TFAP2B, CNBP, ATAD2, LIF, HMGA2, NFATC1, NFKB1, NFKB2,…	1343	580	13824	1.26005
GOTERM_BP_DIRECT	GO:0046777~protein autophosphorylation	19	1.11502	0.033023	NTRK1, EPHA4, HIPK4, FLT1, VRK1, NLK, SLK, MELK, MAPKAPK3, CHEK2, MAK, MKNK2, AAK1, PIM1, MAPKAPK5, NEK2, TNIK, PIM2, DDR2	1343	117	13824	1.67157
GOTERM_BP_DIRECT	GO:0071347~cellular response to interleukin-1	10	0.586854	0.0346859	IL6, CXCL8, CCL20, CCL5, ZC3H12A, CCL3, CCL17, RBMX, NFKB1, CX3CL1	1343	47	13824	2.19008
GOTERM_BP_DIRECT	GO:0032467~positive regulation of cytokinesis	7	0.410798	0.0350048	RACGAP1, PKN2, CDC6, ECT2, AURKB, CDC25B, CIT	1343	26	13824	2.77129
GOTERM_BP_DIRECT	GO:0006264~mitochondrial DNA replication	4	0.234742	0.0352084	MGME1, DNA2, SLC25A33, PRIMPOL	1343	8	13824	5.14669
GOTERM_BP_DIRECT	GO:0051292~nuclear pore complex assembly	4	0.234742	0.0352084	NUP93, NDC1, NUP205, AHCTF1	1343	8	13824	5.14669
GOTERM_BP_DIRECT	GO:0045654~positive regulation of megakaryocyte differentiation	4	0.234742	0.0352084	KDM1A, HMGB2, RAB7B, GATA2	1343	8	13824	5.14669
GOTERM_BP_DIRECT	GO:1900119~positive regulation of execution phase of apoptosis	4	0.234742	0.0352084	DLC1, ZC3H12A, TP53, BOK	1343	8	13824	5.14669
GOTERM_BP_DIRECT	GO:0043583~ear development	4	0.234742	0.0352084	BCL2L11, BCL2, GATA3, STRA6	1343	8	13824	5.14669
GOTERM_BP_DIRECT	GO:0035999~tetrahydrofolate interconversion	4	0.234742	0.0352084	MTHFD1, SHMT2, MTHFS, TYMS	1343	8	13824	5.14669
GOTERM_BP_DIRECT	GO:0000731~DNA synthesis involved in DNA repair	4	0.234742	0.0352084	CDKN2D, POLD1, WRNIP1, POLE	1343	8	13824	5.14669
GOTERM_BP_DIRECT	GO:0045786~negative regulation of cell cycle	6	0.352113	0.0385522	NR4A1, BMP2, CDK6, GMNN, GATA3, NUPR1	1343	20	13824	3.08801
GOTERM_BP_DIRECT	GO:0006405~RNA export from nucleus	5	0.293427	0.0400822	RANBP1, NXT1, POM121C, XPO5	1343	14	13824	3.6762
GOTERM_BP_DIRECT	GO:0000079~regulation of cyclin-dependent protein serine/threonine kinase activity	5	0.293427	0.0400822	CDKN2D, CCNA2, BLM, CDKN2C, MNAT1	1343	14	13824	3.6762
GOTERM_BP_DIRECT	GO:0016925~protein sumoylation	5	0.293427	0.0400822	SUMO2, UBA2, SAE1, TRPM4	1343	14	13824	3.6762
GOTERM_BP_DIRECT	GO:0051276~chromosome organization	5	0.293427	0.0400822	PTTG1, NCAPH2, RAD54L, GEM	1343	14	13824	3.6762
GOTERM_BP_DIRECT	GO:0007050~cell cycle arrest	11	0.64554	0.0413656	CDKN2D, RASSF1, CXCL8, CDKN2C, MSH2, DDIT3, IRF1, PMP22, TP53, PPM1G, CDKN3	1343	56	13824	2.02191
GOTERM_BP_DIRECT	GO:0045599~negative regulation of fat cell differentiation	8	0.469484	0.0418204	ZADH2, DDIT3, E2F1, TRIB3, GATA3, GATA2, TRIB2, JDP2	1343	34	13824	2.42197
GOTERM_BP_DIRECT	GO:0006468~protein phosphorylation	21	1.23239	0.041826	PLK4, NPR2, CSNK2A2, PLK1, ILK, SMAD9, HUS1, VRK1, AURKB, CDC25B, CCND1, RSRC1, CDK2, AAK1, PBK, CCL3, BIRC5, TRIB3, NEK2, TRIB2, STK40	1343	137	13824	1.57782
GOTERM_BP_DIRECT	GO:0007264~small GTPase mediated signal transduction	28	1.64319	0.0465038	DOCK5, DOCK4, RAB3A, RRAD, RHOBTB3, ARHGAP18, RND3, RND1, RASD1, YWHAQ, RALGPS2, ARL10, RAB4A, VAV1, GEM, RAB33A, RAB11A, ARL4C, MFHAS1, IFT22, ARHGAP31, ARL4A, MRAS, RHOV, RAB7B, RHEBL1, RAPGEF3, RHOQ	1343	199	13824	1.44831
GOTERM_BP_DIRECT	GO:0010332~response to gamma radiation	6	0.352113	0.0466894	FANCD2, CHEK2, XRCC2, BCL2, TRIM13, TP53	1343	21	13824	2.94096
GOTERM_BP_DIRECT	GO:0070301~cellular response to hydrogen peroxide	7	0.410798	0.0485657	NET1, IL6, TNFAIP3, ECT2, ZNF277, EZH2, AQP1	1343	28	13824	2.57334
GOTERM_BP_DIRECT	GO:0071803~positive regulation of podosome assembly	4	0.234742	0.0490777	CSF2, SRC, LCP1, TNF	1343	9	13824	4.57483
GOTERM_BP_DIRECT	GO:0071850~mitotic cell cycle arrest	4	0.234742	0.0490777	GADD45GIP1, CDKN1A, RGCC, GADD45A	1343	9	13824	4.57483
GOTERM_BP_DIRECT	GO:0070345~negative regulation of fat cell proliferation	3	0.176056	0.0494675	TFDP1, E2F1, GATA2	1343	4	13824	7.72003
GOTERM_BP_DIRECT	GO:0006418~tRNA aminoacylation for protein translation	3	0.176056	0.0494675	MARS, DARS2, MRPL39	1343	4	13824	7.72003
GOTERM_BP_DIRECT	GO:0071051~polyadenylation-dependent snoRNA 3'-end processing	3	0.176056	0.0494675	EXOSC5, EXOSC3, EXOSC2	1343	4	13824	7.72003
GOTERM_BP_DIRECT	GO:0071042~nuclear polyadenylation-dependent mRNA catabolic process	3	0.176056	0.0494675	EXOSC7, EXOSC9, EXOSC8	1343	4	13824	7.72003
GOTERM_BP_DIRECT	GO:0032392~DNA geometric change	3	0.176056	0.0494675	HMGB2, HMGB3, HMGB1	1343	4	13824	7.72003
GOTERM_BP_DIRECT	GO:0006235~dTTP biosynthetic process	3	0.176056	0.0494675	DTYMK, CMPK2, TYMS	1343	4	13824	7.72003
GOTERM_BP_DIRECT	GO:0000727~double-strand break repair via break-induced replication	3	0.176056	0.0494675	GINS2, CDC45, GINS4	1343	4	13824	7.72003
GOTERM_BP_DIRECT	GO:0071156~regulation of cell cycle arrest	3	0.176056	0.0494675	NEUROD1, FOXM1, SLC25A33	1343	4	13824	7.72003
GOTERM_CC_DIRECT	GO:0005737~cytoplasm	413	24.2371	2.25394e-15	THYN1, LOC515736, SMC3, RBPJ, SMC4, DPYSL4, ZC3H12A, STMN1, HIST3H2BB, SDS, NGDN, KNSTRN, DDX39A, PRKAR1A, DDIT3, DDIT4, PADI2, PRKCQ, PRR11, ATF4, SLBP, URI1, NUP205, PARPBP, SHMT2, CRABP1, CDCA7, NCAPG, AAAS, MEFV, SKA3, IQGAP3, ARPP19, SKA1, SKA2, FIGNL1, MCMBP, HOXC6, BARD1, ARL14EP, HACE1, PLK1, MAD2L1BP, NFATC1, PA2G4, ELL2, MLLT11, GJB3, PKIA, TDP1, PKIG, EZH2, CEP57, BTG3, BTG1, ARPC1A, A…	1458	3109	15461	1.40867
GOTERM_CC_DIRECT	GO:0005634~nucleus	385	22.5939	9.01714e-15	GABPB2, GLDC, CCNF, NUDT1, SMC3, RBPJ, AQP1, ELK3, LGALS3, RASSF1, MT2A, MYB, ZC3H12A, RAVER2, FBXO5, LGALS9, SOX4, HERC6, IER3, IFRD1, OVOL1, THAP1, NEIL3, AZGP1, MT1A, KATNAL2, DDIT3, RRAGD, UPRT, TRIB3, DNA2, ANKRA2, PRR11, TRIB2, TP53, ATF4, RHNO1, URI1, ZBTB8A, CDCA2, EPAS1, SHMT2, CDCA4, CDCA7, STC1, WDR62, GATA3, NLK, MEFV, GATA2, SEC14L2, GRPEL1, FIGNL1, MCMBP, SCAI, CDT1, HACE1, TEX30, B…	1458	2873	15461	1.42104
GOTERM_CC_DIRECT	GO:0000922~spindle pole	31	1.81925	1.48361e-12	CALM, MTCL1, WDR62, KIF11, SMC3, AURKA, DSN1, CCNB1, POC1A, POC1B, NEK2, SPDL1, DYNC1I1, ODF2, CKAP2L, PLK1, CDC6, CKAP5, RAB11A, CDC25B, HAUS1, SGO1, TPX2, NEDD1, CENPF, PSRC1, KIF2A, CALM3, AUNIP, CEP85, CEP44	1458	75	15461	4.38309
GOTERM_CC_DIRECT	GO:0005654~nucleoplasm	189	11.0915	1.12752e-09	ERCC6L, SMARCB1, KDM1A, DSCC1, SMC3, SMC4, IPO7, ELK3, CDC20, RGS3, CCND2, CCND1, ZC3H12A, CHEK1, HIST3H2BB, FBXO5, SNRPD3, KPNA5, KPNA2, SOX4, WDHD1, LIG1, IPMK, VRK1, ILF2, CDC25B, SGO1, SGO2, NEIL3, MAPKAPK3, ETHE1, HAT1, CMPK2, MAPKAPK5, TNIK, FKBP4, ABCG1, SNRPA, RAI14, ASF1B, NUP205, PARPBP, PFKFB3, KHDRBS3, ANKRD11, CDCA7, GATA2, AAAS, PMF1, RACGAP1, RAD21, EIF4EBP1, MCMBP, SURF6, CLSPN, Z…	1458	1310	15461	1.52993
GOTERM_CC_DIRECT	GO:0000776~kinetochore	24	1.40845	1.63207e-09	CENPT, SEH1L, CBX5, CENPW, SPAG5, PINX1, PLK1, SKA3, RANGAP1, KNSTRN, ZWINT, AURKB, NUP160, SGO1, MTBP, CENPF, KIF18A, CENPH, CENPI, KIF2C, NUP43, NEK2, BUB3, NUP37	1458	60	15461	4.2417
GOTERM_CC_DIRECT	GO:0000775~chromosome, centromeric region	17	0.997653	2.72565e-09	SUV39H2, SUV39H1, DSCC1, NGDN, HJURP, CDCA8, SMC3, AURKB, SGO1, SGO2, MIS18A, RAD21, CENPL, BIRC5, CENPN, OIP5, CENPP	1458	31	15461	5.81524
GOTERM_CC_DIRECT	GO:0005813~centrosome	62	3.6385	7.51956e-08	DCLRE1B, CEP57, ERCC6L, CLIC4, CCDC28B, CHEK1, CNTRL, PDE4B, NEK2, TOPBP1, CEP55, GEN1, CKAP2L, CKAP2, VPS37A, HAUS6, TUBG1, MASTL, CKAP5, CDC25B, HAUS1, SGO1, PROCR, KIF2A, POC5, ESPL1, MAK, TRIM59, DCTN6, PCNA, NCAPG, SLC1A4, WDR62, AAAS, AURKA, CCNB1, CDC45, HAUS8, CCDC77, CEP78, RANBP1, PLK3, XRCC2, PLK1, ELL2, RAB11A, MZT1, NUDT21, IFT22, MARCKS, CENPF, CDK6, RGCC, CDK1, HYLS1, PKN2, CALM3, …	1458	321	15461	2.04817
GOTERM_CC_DIRECT	GO:0000777~condensed chromosome kinetochore	17	0.997653	1.06389e-07	DCTN6, CENPU, AHCTF1, ERCC6L, SEH1L, HJURP, ZWINT, PPP1CC, SEPT6, CENPH, BIRC5, CENPM, CENPN, BUB3, DYNC1I1, SPC24, SPC25	1458	38	15461	4.74401
GOTERM_CC_DIRECT	GO:0000790~nuclear chromatin	34	1.99531	2.94649e-06	RARG, SMARCB1, KDM1A, UHRF1, LOC524236, HMGB2, HIST2H2AB, NUCKS1, HMGB1, GATA3, HIST2H2AC, LOC104975684, CHAF1B, CHAF1A, E2F1, MCMBP, HIST1H2AG, E2F4, HIST1H2AC, H2AFZ, NCOA3, H2AFX, H2AFV, NFATC1, UBE2A, RAD51, NASP, HAT1, POLR3G, LOC614970, TP53, ASF1A, ASF1B, EZH2	1458	150	15461	2.40363
GOTERM_CC_DIRECT	GO:0000784~nuclear chromosome, telomeric region	24	1.40845	3.68857e-06	DCLRE1B, DCLRE1A, FEN1, PCNA, MRE11, CBX5, KDM1A, MCM7, LOC530773, PINX1, RPA2, THOC3, WRNIP1, TERF1, PPP1CC, RAD51, MSH2, ORC1, POLD1, HAT1, CDK1, MCM5, DNA2, MCM6	1458	87	15461	2.92531
GOTERM_CC_DIRECT	GO:0005876~spindle microtubule	14	0.821596	8.90969e-06	SPAG5, PLK1, KIF11, SKA3, AURKB, SKA1, SKA2, AURKA, PSRC1, KIF2A, CDK1, NUSAP1, BIRC5, CALM3	1458	35	15461	4.2417
GOTERM_CC_DIRECT	GO:0000785~chromatin	19	1.11502	2.07355e-05	SUV39H2, AHCTF1, PARPBP, DSCC1, PLK1, RPA2, KIF22, SMC3, POLA1, MTBP, RAD51, MIS18A, CCND2, RAD21, CHEK1, OIP5, HMGN2, TP53, TMPO	1458	65	15461	3.0997
GOTERM_CC_DIRECT	GO:0030496~midbody	24	1.40845	5.09126e-05	CLIC4, MTCL1, RCC2, PLK1, SLC2A1, CDCA8, AURKB, GEM, ASPM, PPP1CC, SEPT6, CENPF, PSRC1, RACGAP1, PRC1, MAK, CDK1, BIRC5, PKN2, NEK2, KIF20A, ECT2, CEP44, CEP55	1458	101	15461	2.51982
GOTERM_CC_DIRECT	GO:0005730~nucleolus	87	5.10563	6.56664e-05	FOXA1, TOP2A, DCLRE1A, FEN1, SMARCB1, GEMIN2, CDCA7L, PINX1, HMGB2, HJURP, YBX2, MCM10, RBPJ, PPP1CC, RGS2, CHAF1A, CCND2, C1QBP, NUSAP1, TLE1, IPMK, NGDN, HUS1, DDX54, VRK1, TERF1, ETV4, ILF2, THAP1, RBL2, MRPS9, ARL4A, KIF2A, MDFIC, FANCD2, EZR, TP53, SNRPA, BLM, NIP7, CDCA8, GATA3, TMA16, EXOSC5, EMG1, HIRIP3, ORC1, S100A16, SAP30L, EXOSC9, MKNK2, EXOSC8, RBBP9, SURF6, H1FX, IP6K1, EXOSC3, EXO…	1458	605	15461	1.52491
GOTERM_CC_DIRECT	GO:0000177~cytoplasmic exosome (RNase complex)	7	0.410798	0.000388476	EXOSC7, EXOSC5, CARHSP1, EXOSC9, EXOSC8, EXOSC3, EXOSC2	1458	12	15461	6.18581
GOTERM_CC_DIRECT	GO:0046540~U4/U6 x U5 tri-snRNP complex	9	0.528169	0.000404493	LSM6, SNRPN, PPIH, SNRPE, LSM5, TXNL4A, LSM3, SNRPB, LSM2	1458	21	15461	4.54468
GOTERM_CC_DIRECT	GO:0005874~microtubule	29	1.70188	0.000464072	CEP57, TUBA1C, TUBA3E, TUBB6, TUBB1, STMN1, TPPP, KIF3C, DYNC1I1, CCDC50, ODF2, TUBB, CKAP2, TUBE1, KIF22, TUBB4B, TUBB4A, HAUS1, TPX2, TPPP3, KIF18B, KIF2A, KATNAL2, REEP4, MAP1B, SPRY2, ARHGEF2, KIF20A, FKBP4	1458	153	15461	2.00996
GOTERM_CC_DIRECT	GO:0000228~nuclear chromosome	7	0.410798	0.00066404	TOP2A, RAD51, SMARCB1, MSH2, EXOSC9, FIGNL1, HMGA2	1458	13	15461	5.70998
GOTERM_CC_DIRECT	GO:0000176~nuclear exosome (RNase complex)	7	0.410798	0.00066404	EXOSC7, EXOSC5, EXOSC9, EXOSC8, EXOSC3, EXOSC2, MPHOSPH6	1458	13	15461	5.70998
GOTERM_CC_DIRECT	GO:0042555~MCM complex	6	0.352113	0.000672499	MCM7, TONSL, MCM4, MCMBP, MCM5, MCM6	1458	9	15461	7.0695
GOTERM_CC_DIRECT	GO:0005871~kinesin complex	13	0.762911	0.00087691	KIF24, KIF22, KIF11, KIF15, KIF18A, KIF18B, KIF2A, KIFC1, KIF4A, KIF2C, KIF3C, KIF20A, KIF20B	1458	46	15461	2.99685
GOTERM_CC_DIRECT	GO:0000940~condensed chromosome outer kinetochore	5	0.293427	0.00100825	BUB1B, SPDL1, SKA3, SKA1, SKA2	1458	6	15461	8.83688
GOTERM_CC_DIRECT	GO:0005657~replication fork	7	0.410798	0.00106977	DNMT1, UHRF1, XRCC2, CHEK1, H2AFX, TP53, RAD18	1458	14	15461	5.30213
GOTERM_CC_DIRECT	GO:0000786~nucleosome	17	0.997653	0.00191816	LOC504599, LOC530773, H2AFZ, LOC524236, H2AFX, HIST2H2AB, H2AFV, DCK, HIST2H2AC, LOC104975684, H1F0, LOC614970, H1FX, HIST1H2AG, HIST1H1A, HIST1H2AC	1458	77	15461	2.3412
GOTERM_CC_DIRECT	GO:0005687~U4 snRNP	6	0.352113	0.00209878	SNRPN, SNRPD1, SNRPE, SNRPF, SNRPD3, SNRPB	1458	11	15461	5.78414
GOTERM_CC_DIRECT	GO:0071013~catalytic step 2 spliceosome	18	1.05634	0.00217212	HNRNPA3, SNRPN, MAGOHB, LSM3, CDC40, LSM2, LSM7, SYF2, SNRPD1, MAGOH, PPIE, SNRPE, SNRPA1, SNRPF, SNRPD3, RBMX, BCAS2, SNRPB	1458	85	15461	2.24561
GOTERM_CC_DIRECT	GO:0031390~Ctf18 RFC-like complex	5	0.293427	0.00217686	RFC5, RFC4, RFC2, DSCC1, CHTF18	1458	7	15461	7.57447
GOTERM_CC_DIRECT	GO:0005688~U6 snRNP	5	0.293427	0.00217686	LSM7, LSM6, LSM5, LSM3, LSM2	1458	7	15461	7.57447
GOTERM_CC_DIRECT	GO:0000794~condensed nuclear chromosome	8	0.469484	0.00231027	RAD51, DMC1, CHEK1, H2AFX, NEK2, BRCA1, TOPBP1, TUBG1	1458	21	15461	4.03972
GOTERM_CC_DIRECT	GO:0000793~condensed chromosome	7	0.410798	0.00241882	TOP2A, FANCD2, CDK2, HMGB2, SMARCA5, NCAPG, HMGB1	1458	16	15461	4.63936
GOTERM_CC_DIRECT	GO:0005643~nuclear pore	11	0.64554	0.0026672	NUP93, ENY2, NXT1, POM121C, XPOT, NUTF2, NUP54, KPNA5, AAAS, KPNA2, NUP160	1458	39	15461	2.99094
GOTERM_CC_DIRECT	GO:0032154~cleavage furrow	10	0.586854	0.00273441	PPP1CC, RALA, SEPT6, RACGAP1, PKN2, NF2, MASTL, WASF1, ECT2, RAB11A	1458	33	15461	3.21341
GOTERM_CC_DIRECT	GO:0031262~Ndc80 complex	4	0.234742	0.00310558	NUF2, SPC24, NDC80, SPC25	1458	4	15461	10.6043
GOTERM_CC_DIRECT	GO:1990726~Lsm1-7-Pat1 complex	4	0.234742	0.00310558	LSM7, LSM5, LSM3, LSM2	1458	4	15461	10.6043
GOTERM_CC_DIRECT	GO:0000942~condensed nuclear chromosome outer kinetochore	4	0.234742	0.00310558	CCNB1, PLK1, BUB1, NDC80	1458	4	15461	10.6043
GOTERM_CC_DIRECT	GO:0000307~cyclin-dependent protein kinase holoenzyme complex	7	0.410798	0.00344309	CDKN1A, CDK6, CCND2, CCND1, CDK2, CKS2, CKS1B	1458	17	15461	4.36646
GOTERM_CC_DIRECT	GO:0034719~SMN-Sm protein complex	7	0.410798	0.00344309	SNRPD1, GEMIN2, GEMIN5, SNRPE, SNRPF, SNRPD3, SNRPB	1458	17	15461	4.36646
GOTERM_CC_DIRECT	GO:0005814~centriole	17	0.997653	0.00424268	PLK4, TOP2A, STIL, ODF2, CCNF, KIF24, TUBG1, AURKA, NEDD1, MPHOSPH9, RP2, POC1A, BNIP2, BIRC5, POC1B, CEP170, CCHCR1	1458	83	15461	2.17196
GOTERM_CC_DIRECT	GO:0000781~chromosome, telomeric region	9	0.528169	0.0043155	BLM, NSMCE4A, CHEK2, HAT1, CDK2, DMC1, CHEK1, DOT1L, H2AFX	1458	29	15461	3.29097
GOTERM_CC_DIRECT	GO:0035861~site of double-strand break	9	0.528169	0.0043155	RAD51, MRE11, RNF138, RFWD3, LOC617971, H2AFX, HUS1, RPA2, RAD18	1458	29	15461	3.29097
GOTERM_CC_DIRECT	GO:0005685~U1 snRNP	7	0.410798	0.0047578	SNRPN, SNRPD1, SNRPE, SNRPF, SNRPD3, SNRPA, SNRPB	1458	18	15461	4.12388
GOTERM_CC_DIRECT	GO:0016605~PML body	14	0.821596	0.00523393	BLM, MRE11, CBX5, RPA2, HIPK1, THAP1, TRIM8, ISG20, RAD51, CHEK2, SUMO2, TOPBP1, TP53	1458	63	15461	2.3565
GOTERM_CC_DIRECT	GO:0031616~spindle pole centrosome	5	0.293427	0.00671536	TBCCD1, BNIP2, AURKB, DLGAP5, AURKA	1458	9	15461	5.89125
GOTERM_CC_DIRECT	GO:0005829~cytosol	121	7.10094	0.00676888	VPS29, CDA, SERPINE2, IRS1, GEMIN2, DIXDC1, HSF2BP, IPO7, SAT1, RGS2, MT2A, RNF115, CCND2, SNRPD1, ARHGDIB, WWC3, SNRPD3, CHAC1, KPNA5, UBASH3A, KPNA2, TLE1, CARHSP1, MTHFD1, MTHFD2, MAP1B, CRYZL1, DDIT4, CMPK2, GEMIN5, SNRPE, UPRT, SNRPF, FKBP4, ANKRA2, EZR, TP53, SNRPB, CALM, GMPS, RHOBTB3, ZFP36L1, BAG4, BAG5, S100A16, BTBD3, EIF4EBP1, PCK1, EVI5, BCL2L14, BCL2L15, YARS, OSBPL6, SIAH2, ASNS, C…	1458	1025	15461	1.25182
GOTERM_CC_DIRECT	GO:0032133~chromosome passenger complex	4	0.234742	0.00721899	CDCA8, BIRC5, AURKB, AURKA	1458	5	15461	8.4834
GOTERM_CC_DIRECT	GO:0051233~spindle midzone	6	0.352113	0.00990925	RACGAP1, PLK1, CDCA8, CDC6, GEM, AURKA	1458	15	15461	4.2417
GOTERM_CC_DIRECT	GO:0031080~nuclear pore outer ring	5	0.293427	0.0103651	AHCTF1, SEH1L, NUP43, NUP160, NUP37	1458	10	15461	5.30213
GOTERM_CC_DIRECT	GO:0005681~spliceosomal complex	12	0.704225	0.0124043	LSM6, DDX39A, ALYREF, GEMIN2, WBP4, PPIE, PPIH, SNRPE, WBP11, LSM5, TXNL4A, SNRPA	1458	55	15461	2.31366
GOTERM_CC_DIRECT	GO:0034715~pICln-Sm protein complex	4	0.234742	0.0134297	SNRPD1, SNRPE, SNRPF, SNRPD3	1458	6	15461	7.0695
GOTERM_CC_DIRECT	GO:0031298~replication fork protection complex	4	0.234742	0.0134297	GINS2, CDC45, GINS4, MCM10	1458	6	15461	7.0695
GOTERM_CC_DIRECT	GO:0005667~transcription factor complex	25	1.46714	0.0150161	RARG, KDM1A, EPAS1, GATA3, NRF1, RBPJ, LIMD1, GATA2, PDLIM1, ELMSAN1, E2F4, E2F8, LMO4, PBX3, SMAD9, TRERF1, RBL2, NR4A1, ZEB1, RBL1, TFDP1, TFDP2, CDK2, TP53, RCOR2	1458	160	15461	1.65691
GOTERM_CC_DIRECT	GO:0016020~membrane	105	6.16197	0.0165059	FAM49B, RAB3A, CPNE6, LOXL4, CPOX, IPO7, FBL, CCND1, NIPAL1, PHLDA2, KPNA2, GTSE1, HPCAL1, WRNIP1, ILF2, DDX39A, MTHFD1, MSH2, GEMIN5, ANKRA2, PRR11, CBFB, RRAD, NCAPG, HMMR, PKMYT1, NCAPH, NEU2, CCNB1, BAG5, ORC6, RAD21, RAB4A, NCAPH2, PA2G4, PAICS, NDC80, GNAQ, GNB1, BCL2, NDUFAF2, CDK1, XKR4, AARS, DOCK4, MCM7, LOC530773, ZMYND19, NCAPG2, ILK, KIF11, CHTF18, KIF15, SPRED1, YWHAQ, PSD3, NUF2, C…	1458	902	15461	1.23442
GOTERM_CC_DIRECT	GO:0005682~U5 snRNP	6	0.352113	0.0174269	SNRPN, SNRPD1, SNRPE, SNRPD3, TXNL4A, SNRPB	1458	17	15461	3.74268
GOTERM_CC_DIRECT	GO:0016363~nuclear matrix	12	0.704225	0.0182237	POLA1, CLIC4, CENPF, AHCTF1, BLM, PAXIP1, XPOT, UHRF1, CFL2, SMC3, TP53, LMNB1	1458	58	15461	2.19398
GOTERM_CC_DIRECT	GO:0034709~methylosome	5	0.293427	0.0209729	SNRPD1, SNRPE, SNRPF, SNRPD3, SNRPB	1458	12	15461	4.41844
GOTERM_CC_DIRECT	GO:0000178~exosome (RNase complex)	4	0.234742	0.0218694	EXOSC9, EXOSC8, EXOSC3, EXOSC2	1458	7	15461	6.05957
GOTERM_CC_DIRECT	GO:0001652~granular component	3	0.176056	0.0249547	FBL, CLEC3B, SURF6	1458	3	15461	10.6043
GOTERM_CC_DIRECT	GO:0000444~MIS12/MIND type complex	3	0.176056	0.0249547	MIS12, PMF1, NSL1	1458	3	15461	10.6043
GOTERM_CC_DIRECT	GO:0000811~GINS complex	3	0.176056	0.0249547	GINS1, GINS2, GINS4	1458	3	15461	10.6043
GOTERM_CC_DIRECT	GO:0005666~DNA-directed RNA polymerase III complex	6	0.352113	0.0279755	CRCP, POLR3C, POLR3E, POLR3G, POLR3K, POLR2K	1458	19	15461	3.34871
GOTERM_CC_DIRECT	GO:0005683~U7 snRNP	4	0.234742	0.0325732	SNRPE, SNRPF, SNRPD3, SNRPB	1458	8	15461	5.30213
GOTERM_CC_DIRECT	GO:0005680~anaphase-promoting complex	6	0.352113	0.0344889	CDC20, MAD2L2, FZR1, CDC23, UBE2C, UBE2S	1458	20	15461	3.18128
GOTERM_CC_DIRECT	GO:0030175~filopodium	9	0.528169	0.0351264	ABI1, NGDN, FAT1, LCP1, NF2, EZR, DNALI1, RAPGEF3, MYO1G	1458	41	15461	2.32776
GOTERM_CC_DIRECT	GO:0072686~mitotic spindle	8	0.469484	0.0364251	ESPL1, SPAG5, MAK, CDK1, KIF22, KNSTRN, GEM, AURKA	1458	34	15461	2.49512
GOTERM_CC_DIRECT	GO:0005686~U2 snRNP	6	0.352113	0.0418651	SNRPN, SNRPD1, SNRPE, SNRPA1, SNRPD3, SNRPB	1458	21	15461	3.02979
GOTERM_CC_DIRECT	GO:0045120~pronucleus	4	0.234742	0.0455021	CENPF, WASF1, AURKA, EZH2	1458	9	15461	4.713
GOTERM_CC_DIRECT	GO:0000796~condensin complex	3	0.176056	0.0468038	NCAPG, SMC4, NCAPH	1458	4	15461	7.95319
GOTERM_CC_DIRECT	GO:0005663~DNA replication factor C complex	3	0.176056	0.0468038	RFC5, RFC4, RFC2	1458	4	15461	7.95319
GOTERM_CC_DIRECT	GO:0000778~condensed nuclear chromosome kinetochore	3	0.176056	0.0468038	MIS18BP1, BUB1B, NDC80	1458	4	15461	7.95319
GOTERM_MF_DIRECT	GO:0005524~ATP binding	172	10.0939	2.84804e-08	CARS, ERCC6L, DGKD, VARS, BUB1B, UBE2D1, UBE2L6, TTF2, SMC3, SMC4, SLK, CHEK2, CHEK1, RUVBL1, PIM1, NEK2, PIM2, STK32A, EPHA4, TOR3A, ENTPD1, LIG1, SWAP70, CSNK2A2, SARS, WRNIP1, VRK1, ILF2, SLFN11, DDX39A, MELK, MAPKAPK3, MTHFD1, MSH2, KATNAL2, MAK, CMPK1, PRKCQ, MAPKAPK5, TRIB3, DNA2, TNIK, KIF20A, FKBP4, KIF20B, ABCG4, TP53, ABCG1, NAIP, EPHA2, BLM, PFKFB3, NPR2, GMPS, RHOBTB3, NLK, PKMYT1, ST…	1230	1224	13095	1.49605
GOTERM_MF_DIRECT	GO:0003677~DNA binding	101	5.92723	1.75386e-07	ERCC6L, MRE11, SMARCB1, ZC3H12A, MYB, NUSAP1, HIST1H2AG, HIST3H2BB, HMGN2, HIST1H2AC, TMPO, GEN1, LIG1, LOC525433, SWAP70, WRNIP1, ILF2, CARHSP1, DDIT3, DNA2, TP53, HIST1H2BA, ATF4, DNMT1, ZBTB8A, BLM, PARPBP, CBFB, NEUROD1, ORC1, SURF6, H1FX, CDT1, ZBTB17, FANCM, HMGA1, SMARCA5, SMAD9, NFATC1, PA2G4, SSH2, PALB2, NFKB1, NFKB2, NR4A1, POLA1, LOC617043, POLA2, LOC614970, MXD3, RAD18, FEN1, LOC5307…	1230	640	13095	1.68013
GOTERM_MF_DIRECT	GO:0042393~histone binding	16	0.938967	5.93848e-06	PRMT6, LOC504599, UHRF1, ATAD2, TONSL, HMGB2, HJURP, HMGB1, DEK, CKS1B, CHAF1B, HAT1, ANP32E, CKS2, ASF1A, ASF1B	1230	44	13095	3.8714
GOTERM_MF_DIRECT	GO:0043142~single-stranded DNA-dependent ATPase activity	8	0.469484	1.48307e-05	RFC5, RFC4, RAD51, RFC2, DSCC1, DNA2, CHTF18, RAD18	1230	11	13095	7.74279
GOTERM_MF_DIRECT	GO:0003684~damaged DNA binding	16	0.938967	1.97036e-05	DCLRE1B, DCLRE1A, PCNA, H2AFX, HMGB2, XRCC1, RPA2, BRCA1, HMGB1, DDB2, NEIL3, MSH2, POLD1, RPA3, LOC617971, TP53	1230	48	13095	3.54878
GOTERM_MF_DIRECT	GO:0003682~chromatin binding	53	3.11033	2.03347e-05	RERE, TOP2A, KDM1A, NUCKS1, SMC3, RBPJ, GLI1, GLI3, HHEX, EXO1, ZC3H12A, CIC, POLE, PRMT6, TLE4, HELLS, ACTL6A, ZEB1, CKS2, MCM5, NUPR1, TP53, JDP2, ASF1A, DLX1, URI1, ENY2, PCNA, SHMT2, FAAP24, GATA3, GATA2, HOXD10, RELB, PRIMPOL, NEUROD1, CDC45, ORC1, POLD1, RAD21, MCMBP, CBX5, ATAD2, DEK, SSRP1, NFKB1, NFKB2, POLA1, RAD51, UBE2T, CDK1, PHF13, RBMX	1230	308	13095	1.832
GOTERM_MF_DIRECT	GO:0008017~microtubule binding	19	1.11502	7.04121e-05	CEP57, MTCL1, MAST2, PLK1, KIF22, SKA1, SKA2, PSRC1, BCL2L11, KIF2A, REEP4, NUSAP1, BIRC5, CHP1, KIF3C, KIF20A, TPPP, EZR, FAM83D	1230	71	13095	2.84902
GOTERM_MF_DIRECT	GO:0003697~single-stranded DNA binding	17	0.997653	7.35855e-05	BLM, MCM7, XRCC2, HMGB2, RPA2, MCM10, HMGB1, YBX3, NEIL3, CDC45, RAD51, MSH2, RNF138, RPA3, TDP1, DMC1, MCM6	1230	59	13095	3.06759
GOTERM_MF_DIRECT	GO:0042056~chemoattractant activity	10	0.586854	0.000132811	LGALS3, M-SAA3.2, CCL5, SAA3, HMGB2, CCL3, SAA2, VEGFC, HMGB1, VEGFA	1230	23	13095	4.62884
GOTERM_MF_DIRECT	GO:0008301~DNA binding, bending	7	0.410798	0.00020602	TOP2A, HHEX, HMGB2, HMGB3, HMGA2, HMGB1, TERF1	1230	11	13095	6.77494
GOTERM_MF_DIRECT	GO:0004672~protein kinase activity	27	1.58451	0.000426831	DYRK3, NPR2, BUB1B, AATK, PKMYT1, AURKA, CAMKV, CCND1, STK35, CCL5, PBK, PIM1, CCL3, NEK2, BUB1, CDK17, EPHA4, HIPK4, MMD, LIMK1, HIPK1, MAK, AAK1, BMP2K, TRIB3, TNIK, TRIB2	1230	138	13095	2.08298
GOTERM_MF_DIRECT	GO:0008134~transcription factor binding	18	1.05634	0.000470691	LMO4, CEBPG, HMGA1, HMGB2, FHL2, NUCKS1, RBPJ, TRERF1, TFDP1, MDFIC, CCND1, ELMSAN1, C1QBP, PIM1, ID3, TRIB2, RCOR2, MDFI	1230	75	13095	2.55512
GOTERM_MF_DIRECT	GO:0005525~GTP binding	52	3.05164	0.000714197	RAB3A, RND3, RND1, TUBA1C, TUBB6, TUBA1B, SEPT6, TUBA1A, TUBB1, ARL10, TUBB, RRAS2, TUBG1, GTPBP2, RAB33A, GEM, ARL4C, ARL4A, MRAS, RAP2B, RP2, RRAGD, UPRT, RHOV, RAB7B, FKBP4, RHOQ, RALA, RRAD, NPR2, RHOBTB3, TUBA3E, RASD1, PCK1, PCK2, EEFSEC, SEPT10, RAB4A, GCH1, TUBE1, TUBB4B, TUBB4A, RAB11A, GPN3, EHD1, MFHAS1, IFT22, EHD4, GNAQ, NMUR2, KRAS, RHEBL1	1230	345	13095	1.60467
GOTERM_MF_DIRECT	GO:0000400~four-way junction DNA binding	7	0.410798	0.00104545	RAD51, MSH2, XRCC2, DMC1, HMGB2, HMGB3, HMGB1	1230	14	13095	5.32317
GOTERM_MF_DIRECT	GO:0019901~protein kinase binding	17	0.997653	0.00276215	CDKN2D, PLK1, CDC25C, CDC25A, AURKA, CKS1B, CCNA2, PPP1CC, CCNB1, BAG5, CCND2, MSH2, CCND1, RNF138, CKS2, SPRY2, KIF20A	1230	80	13095	2.26235
GOTERM_MF_DIRECT	GO:0003689~DNA clamp loader activity	5	0.293427	0.0039673	RFC5, RFC4, RFC2, DSCC1, CHTF18	1230	8	13095	6.65396
GOTERM_MF_DIRECT	GO:0031625~ubiquitin protein ligase binding	21	1.23239	0.00444445	USP13, HSPA9, UBE2C, TUBB, CXCR4, UBE2A, UBE2J1, AURKA, NFKBIA, BAG5, TUBA1A, PRKAR1A, UBE2S, UBE2T, BTBD3, SUMO2, TRIB3, ANKRA2, TP53, TRIB2	1230	114	13095	1.96117
GOTERM_MF_DIRECT	GO:0008083~growth factor activity	15	0.880282	0.0064159	CSF3, CSF2, GMFG, OSGIN1, LIF, VEGFC, OSGIN2, NGF, GRO1, AREG, VEGFA, EREG, IL6, VGF, IL7	1230	72	13095	2.21799
GOTERM_MF_DIRECT	GO:0019904~protein domain specific binding	10	0.586854	0.00874807	TFDP1, YWHAQ, CBX3, HMGB2, PLAUR, ID3, PLG, EZR, LIN7B, YWHAG	1230	39	13095	2.72983
GOTERM_MF_DIRECT	GO:0003690~double-stranded DNA binding	11	0.64554	0.0105812	NEIL3, RAD51, TDP1, XRCC2, DMC1, HMGB2, HMGB3, NUCKS1, MND1, HMGB1, TP53	1230	47	13095	2.4917
GOTERM_MF_DIRECT	GO:0003723~RNA binding	37	2.17136	0.0114199	TDRKH, PUS10, DNMT1, DDX21, MRPL39, BRCA1, MRM3, CTIF, FBL, SNRPD1, XPO5, SURF6, SNRPD3, EXOSC3, EXOSC2, PAIP1, BARD1, SNRPN, ALYREF, THOC3, LSM5, MEX3C, ILF2, QKI, LSM3, LARP6, LSM7, LSM6, FUBP1, IMPDH2, NCL, PPIE, SRSF3, SNRPE, SNRPF, SNRPA, SNRPB	1230	260	13095	1.51506
GOTERM_MF_DIRECT	GO:0003678~DNA helicase activity	5	0.293427	0.014871	MCM7, MCM4, MCM5, DNA2, MCM6	1230	11	13095	4.83925
GOTERM_MF_DIRECT	GO:0008009~chemokine activity	9	0.528169	0.0164737	CXCL8, CCL20, CCL5, CCL3, GRO1, CXCL3, CCL17, CXCL5, CX3CL1	1230	36	13095	2.66159
GOTERM_MF_DIRECT	GO:0003887~DNA-directed DNA polymerase activity	7	0.410798	0.0168815	POLD3, POLA1, POLA2, POLD1, POLE2, POLE, PRIMPOL	1230	23	13095	3.24019
GOTERM_MF_DIRECT	GO:0061630~ubiquitin protein ligase activity	23	1.34977	0.0175238	MYLIP, UHRF1, UBE2C, FANCL, SIAH2, RNF38, RNF19B, UBE2A, CCNB1IP1, TRAIP, UBE2J1, PJA1, RNF41, RNF145, ZNRF1, RNF115, RNF125, RNF138, UBE2S, UBE2T, TRIM59, PDZRN3, RAD18	1230	146	13095	1.67716
GOTERM_MF_DIRECT	GO:0017091~AU-rich element binding	5	0.293427	0.0206773	EXOSC7, NUDT21, EXOSC9, EXOSC8, ELAVL3	1230	12	13095	4.43598
GOTERM_MF_DIRECT	GO:1990841~promoter-specific chromatin binding	5	0.293427	0.0206773	RBL2, DNMT1, RBL1, E2F4, EZH2	1230	12	13095	4.43598
GOTERM_MF_DIRECT	GO:0003924~GTPase activity	26	1.52582	0.0207321	RALA, RAB3A, TUBA1C, TUBA3E, TUBA1B, TUBB6, TUBA1A, GNG2, TUBB1, ARHGDIB, EEFSEC, RAB4A, TUBB, TUBE1, GTPBP2, TUBB4B, TUBG1, TUBB4A, GEM, RAB11A, GPN3, GNAQ, GNB1, RRAGD, KRAS, RHOQ	1230	174	13095	1.59083
GOTERM_MF_DIRECT	GO:0005096~GTPase activator activity	27	1.58451	0.0212023	DOCK4, RGS16, ARHGAP18, ASAP1, ARHGAP22, RGS2, RGS3, RACGAP1, ARHGDIB, ECT2, EVI5, TBC1D15, RANBP1, TBC1D9, OCRL, GMIP, RANGAP1, TBC1D1, ARHGAP31, RP2, CDC42EP5, GNAQ, DLC1, CDC42EP4, RASA2	1230	183	13095	1.57077
GOTERM_MF_DIRECT	GO:0001135~transcription factor activity, RNA polymerase II transcription factor recruiting	4	0.234742	0.0216237	MYB, LIF, MYBL2, MYBL1	1230	7	13095	6.08362
GOTERM_MF_DIRECT	GO:0000979~RNA polymerase II core promoter sequence-specific DNA binding	10	0.586854	0.0220479	NR4A2, TFAP2B, NFIL3, GBX2, H2AFZ, GATA3, RBPJ, GATA2, ZNF277, EZH2	1230	45	13095	2.36585
GOTERM_MF_DIRECT	GO:0004487~methylenetetrahydrofolate dehydrogenase (NAD+) activity	3	0.176056	0.0247557	MTHFD1, MTHFD2, MTHFD2L	1230	3	13095	10.6463
GOTERM_MF_DIRECT	GO:0009041~uridylate kinase activity	3	0.176056	0.0247557	DTYMK, CMPK1, CMPK2	1230	3	13095	10.6463
GOTERM_MF_DIRECT	GO:0015266~protein channel activity	4	0.234742	0.0322176	TOMM40, TIMM17B, TIMM22, TOMM20	1230	8	13095	5.32317
GOTERM_MF_DIRECT	GO:0061631~ubiquitin conjugating enzyme activity	7	0.410798	0.0359145	UBE2C, UBE2Q2, UBE2S, UBE2T, UBE2D1, UBE2A, UBE2J1	1230	27	13095	2.76016
GOTERM_MF_DIRECT	GO:0004674~protein serine/threonine kinase activity	29	1.70188	0.0424448	MAST3, MAST2, ILK, PKMYT1, AURKB, CHEK2, PIM1, PIM2, STK32A, MARK1, PLK4, PLK3, CSNK2A2, PLK1, VRK1, MASTL, CIT, WEE1, MELK, MAPKAPK3, PDIK1L, MAK, AAK1, PKN2, SGK3, PRKCQ, SGK2, STK40, CAMK1G	1230	213	13095	1.4495
GOTERM_MF_DIRECT	GO:0044212~transcription regulatory region DNA binding	18	1.05634	0.0426307	FOXA1, GABPB2, KDM1A, NFYB, BCL11A, BRCA1, GATA3, TNF, KLF15, TRERF1, BASP1, ELMSAN1, MYB, MYBL2, ZNF567, TP53, MYBL1, RCOR2	1230	116	13095	1.65202
GOTERM_MF_DIRECT	GO:0003688~DNA replication origin binding	4	0.234742	0.0450195	ORC6, CDC45, MCM10, MCM5	1230	9	13095	4.73171
GOTERM_MF_DIRECT	GO:0017056~structural constituent of nuclear pore	5	0.293427	0.0454992	NUP93, NDC1, NUP205, POM121C, NUP54	1230	15	13095	3.54878
GOTERM_MF_DIRECT	GO:0004477~methenyltetrahydrofolate cyclohydrolase activity	3	0.176056	0.0464438	MTHFD1, MTHFD2, MTHFD2L	1230	4	13095	7.98476
GOTERM_MF_DIRECT	GO:0070182~DNA polymerase binding	3	0.176056	0.0464438	RAD51, PCNA, FANCD2	1230	4	13095	7.98476
GOTERM_MF_DIRECT	GO:0003896~DNA primase activity	3	0.176056	0.0464438	POLA1, PRIM1, PRIMPOL	1230	4	13095	7.98476
GOTERM_MF_DIRECT	GO:0004488~methylenetetrahydrofolate dehydrogenase (NADP+) activity	3	0.176056	0.0464438	MTHFD1, MTHFD2, MTHFD2L	1230	4	13095	7.98476
GOTERM_MF_DIRECT	GO:0004842~ubiquitin-protein transferase activity	26	1.52582	0.0471788	UHRF1, TNFAIP3, UBE2D1, BRCA1, ZNRF1, UBE2Q2, HERC6, BARD1, MYLIP, HACE1, SMURF2, UBE2C, MARCH5, DDB2, RNF41, UBE2S, RFWD3, UBE2T, G2E3, TRIM13, TRIM36, BIRC5, RNF141, NAIP, RNF187, BIRC3	1230	188	13095	1.47237
GOTERM_MF_DIRECT	GO:0001228~transcriptional activator activity, RNA polymerase II transcription regulatory region sequence-specific binding	13	0.762911	0.0499657	FOXA1, OSR2, CSRNP2, ARID3B, GATA3, GATA2, ETV5, RAD21, PAX9, MAFF, MSX1, E2F4, TP53	1230	76	13095	1.82108
Enrichment results of GO by genes with decreased expression 24h p.i. with strain cp
Category	Term	Count	%	PValue	Genes	List Total	Pop Hits	Pop Total	Fold Enrichment
GOTERM_BP_DIRECT	GO:0030148~sphingolipid biosynthetic process	9	0.481541	8.48076e-06	HACD1, ELOVL4, ELOVL5, ELOVL2, ELOVL6, KDSR, ELOVL7, HACD3, HACD4	1395	13	13824	6.86055
GOTERM_BP_DIRECT	GO:0002504~antigen processing and presentation of peptide or polysaccharide antigen via MHC class II	10	0.535045	2.19417e-05	DSB, LA-DQB, BOLA-DQA1, BOLA-DQA2, BOLA-DQB, BLA-DQB, BOLA-DRB3, BOLA-DRA, LOC100848815, BOLA-DMB	1395	18	13824	5.50538
GOTERM_BP_DIRECT	GO:0006486~protein glycosylation	21	1.1236	4.46e-05	GALNT12, POMT2, B3GALNT1, ST8SIA1, SEC1, GALNT18, B3GALT4, ALG1, PSEN1, NAGPA, POMGNT1, EXT1, FUT6, EXT2, B3GNT8, NPC1, B3GNT3, ST8SIA4, GCNT3, ST3GAL5, MGAT1	1395	76	13824	2.7382
GOTERM_BP_DIRECT	GO:0042761~very long-chain fatty acid biosynthetic process	8	0.428036	0.000189188	HACD1, ELOVL4, ELOVL5, ELOVL2, ELOVL6, ELOVL7, HACD3, HACD4	1395	14	13824	5.66267
GOTERM_BP_DIRECT	GO:0015991~ATP hydrolysis coupled proton transport	11	0.58855	0.000477442	ATP6V1A, ATP6V0B, ATP6V0E1, ATP6V0A2, TCIRG1, ATP1A1, ATP6V0D1, ATP6V0E2, ATP6V0C, ATP6V0A1, ATP6V1B1	1395	30	13824	3.63355
GOTERM_BP_DIRECT	GO:0006509~membrane protein ectodomain proteolysis	8	0.428036	0.00122073	BACE1, BACE2, NCSTN, SPPL2A, DAG1, PSEN2, MYH9, PSEN1	1395	18	13824	4.4043
GOTERM_BP_DIRECT	GO:0050435~beta-amyloid metabolic process	6	0.321027	0.00168972	BACE1, BACE2, NCSTN, MME, PSEN2, APEH	1395	10	13824	5.94581
GOTERM_BP_DIRECT	GO:0055114~oxidation-reduction process	49	2.62172	0.00252908	DHRS12, DHRS13, CYB561D1, TM7SF2, CYB561D2, ALDH2, FADS6, PHYHD1, VKORC1, GPX3, DCXR, RSAD1, SORD, GPX7, HSD11B1L, SUMF1, POR, CYP2U1, DPYD, CAT, RDH5, PAOX, GLYR1, ND6, NXN, HMGCR, DDO, CYB5R1, RDH10, ALDH3B1, KDSR, PRODH, FDFT1, SDR42E1, CYP51A1, HSD3B1, MICAL3, MTHFR, CYBRD1, FAM213A, DHRS3, COQ6, RPE65, TMLHE, TBXAS1, PCYOX1L, DHCR7, PAM, CYB561	1395	316	13824	1.53663
GOTERM_BP_DIRECT	GO:0007040~lysosome organization	9	0.481541	0.00311195	MFSD8, HOOK2, GNPTAB, GAA, HEXA, VPS11, TMEM106B, TPP1, ACP2	1395	26	13824	3.43027
GOTERM_BP_DIRECT	GO:0035023~regulation of Rho protein signal transduction	16	0.856073	0.00366437	VAV3, FARP1, ARHGEF28, ARHGEF16, ARHGEF10L, FGD3, TIAM1, FGD4, ALS2CL, ALS2, SPATA13, ARHGEF3, FLOT1, EPS8L1, ARHGEF40, ARHGEF5	1395	70	13824	2.26507
GOTERM_BP_DIRECT	GO:0016139~glycoside catabolic process	4	0.214018	0.00378461	FUCA1, FUCA2, NAGA, GBA2	1395	4	13824	9.90968
GOTERM_BP_DIRECT	GO:0033539~fatty acid beta-oxidation using acyl-CoA dehydrogenase	7	0.374532	0.00483671	ACAD8, ACADVL, ACOX2, ACOX3, ACADM, ACADS, ACADSB	1395	17	13824	4.08046
GOTERM_BP_DIRECT	GO:0034626~fatty acid elongation, polyunsaturated fatty acid	5	0.267523	0.0051646	ELOVL4, ELOVL5, ELOVL2, ELOVL6, ELOVL7	1395	8	13824	6.19355
GOTERM_BP_DIRECT	GO:0019367~fatty acid elongation, saturated fatty acid	5	0.267523	0.0051646	ELOVL4, ELOVL5, ELOVL2, ELOVL6, ELOVL7	1395	8	13824	6.19355
GOTERM_BP_DIRECT	GO:0034625~fatty acid elongation, monounsaturated fatty acid	5	0.267523	0.0051646	ELOVL4, ELOVL5, ELOVL2, ELOVL6, ELOVL7	1395	8	13824	6.19355
GOTERM_BP_DIRECT	GO:0007160~cell-matrix adhesion	14	0.749064	0.0059814	FGB, ITGB5, ITGB3, ITGA1, ITGB2, EPDR1, TSC1, MSLN, CTGF, TIAM1, BCAM, COL5A3, ITGB6, TMEM8B	1395	60	13824	2.31226
GOTERM_BP_DIRECT	GO:0051603~proteolysis involved in cellular protein catabolic process	10	0.535045	0.0065855	CTSA, SCPEP1, CTSZ, CTSH, CTSV, CTSF, CTSS, CTSC, CTSB, LGMN	1395	35	13824	2.83134
GOTERM_BP_DIRECT	GO:0042572~retinol metabolic process	7	0.374532	0.0066447	TTR, DGAT2, RDH10, RDH5, LRAT, DHRS3, RPE65	1395	18	13824	3.85376
GOTERM_BP_DIRECT	GO:0006890~retrograde vesicle-mediated transport, Golgi to ER	9	0.481541	0.00810749	COPB2, COPA, TMED10, COG4, LMAN2, GBF1, RAB6B, ATP9B, DNAJC28	1395	30	13824	2.9729
GOTERM_BP_DIRECT	GO:0006955~immune response	34	1.81915	0.00944025	IL21, TNFRSF6B, BOLA-DQA1, BOLA-DQA2, SECTM1, BLA-DQB, CTSS, IGF1R, VPREB3, DSB, LOC751574, ENPP1, CTSH, BOLA-DRA, ENPP3, TNFRSF4, BOLA, SECTM1A, LA-DQB, TNFSF15, BOLA-DRB3, BMP6, TNFRSF1A, OAS1Y, TMIGD2, IL2RA, IRF8, BOLA-DQB, TNFRSF25, LTBR, CCL28, LOC100848815, BOLA-DMB, CCL27	1395	215	13824	1.56711
GOTERM_BP_DIRECT	GO:0060348~bone development	9	0.481541	0.0121616	VKORC1, SPARC, IFT172, P3H1, SLC38A10, BBX, FGFR2, SULF2, TRIM45	1395	32	13824	2.7871
GOTERM_BP_DIRECT	GO:0035987~endodermal cell differentiation	8	0.428036	0.0123184	ITGB5, LAMB3, COL4A2, MMP15, COL11A1, ITGB2, FN1, ITGA7	1395	26	13824	3.04913
GOTERM_BP_DIRECT	GO:0006636~unsaturated fatty acid biosynthetic process	5	0.267523	0.013139	ELOVL4, ELOVL5, ELOVL6, ELOVL7, DECR2	1395	10	13824	4.95484
GOTERM_BP_DIRECT	GO:0007035~vacuolar acidification	5	0.267523	0.013139	ATP6V0B, ATP6V0A2, TCIRG1, ATP6V0D1, ATP6V0A1	1395	10	13824	4.95484
GOTERM_BP_DIRECT	GO:0071577~zinc II ion transmembrane transport	5	0.267523	0.013139	SLC30A7, SLC30A3, SLC39A7, SLC39A2, SLC39A14	1395	10	13824	4.95484
GOTERM_BP_DIRECT	GO:0016485~protein processing	13	0.695559	0.0152985	RHBDF1, CPM, IFT172, KLK13, PSEN2, ECE1, PCSK7, PSEN1, CPZ, CTSS, CLN3, NCSTN, ATG4A	1395	60	13824	2.1471
GOTERM_BP_DIRECT	GO:0042773~ATP synthesis coupled electron transport	4	0.214018	0.0161956	COX2, ND4L, ND5, ND4	1395	6	13824	6.60645
GOTERM_BP_DIRECT	GO:0015804~neutral amino acid transport	4	0.214018	0.0161956	SLC6A17, LOC518422, SLC43A2, LOC506670	1395	6	13824	6.60645
GOTERM_BP_DIRECT	GO:0035338~long-chain fatty-acyl-CoA biosynthetic process	4	0.214018	0.0161956	ELOVL4, ELOVL5, ELOVL6, ELOVL7	1395	6	13824	6.60645
GOTERM_BP_DIRECT	GO:0006914~autophagy	11	0.58855	0.0169872	VMP1, GABARAPL2, SRPX, TM9SF1, VCP, NPC1, VTI1A, ATG4A, TMBIM6, CTSD, VPS39	1395	47	13824	2.31929
GOTERM_BP_DIRECT	GO:0030433~ER-associated ubiquitin-dependent protein catabolic process	11	0.58855	0.0195774	ERLEC1, VCP, OS9, FBXO2, EDEM2, SYVN1, UBXN8, ERLIN1, FBXO6, ERLIN2, UBXN4	1395	48	13824	2.27097
GOTERM_BP_DIRECT	GO:0010468~regulation of gene expression	13	0.695559	0.0196038	SCARA5, FAM46A, EIF4A3, ROM1, ATP1B1, TOB2, NARFL, ATRAID, TGFBR1, POFUT2, FUT8, LHX1, CYP1A2	1395	62	13824	2.07784
GOTERM_BP_DIRECT	GO:0055088~lipid homeostasis	8	0.428036	0.0224058	ACAD8, ACADVL, ACOX2, PNPLA4, ACOX3, ACADM, ACADS, ACADSB	1395	29	13824	2.7337
GOTERM_BP_DIRECT	GO:0019722~calcium-mediated signaling	7	0.374532	0.0233622	LAT2, EDN1, EDN2, SPHK1, LRRK2, AGTR1, PPP1R9A	1395	23	13824	3.01599
GOTERM_BP_DIRECT	GO:0097503~sialylation	4	0.214018	0.0262381	ST6GALNAC2, ST8SIA1, ST8SIA4, ST3GAL5	1395	7	13824	5.66267
GOTERM_BP_DIRECT	GO:0016322~neuron remodeling	4	0.214018	0.0262381	APP, NTN4, SCARF1, C1QL1	1395	7	13824	5.66267
GOTERM_BP_DIRECT	GO:0016242~negative regulation of macroautophagy	4	0.214018	0.0262381	CLN3, NRBP2, NPC1, QSOX1	1395	7	13824	5.66267
GOTERM_BP_DIRECT	GO:0071578~zinc II ion transmembrane import	4	0.214018	0.0262381	SLC39A5, SLC39A10, SLC39A8, SLC39A14	1395	7	13824	5.66267
GOTERM_BP_DIRECT	GO:0071711~basement membrane organization	4	0.214018	0.0262381	FLRT2, COL4A1, DAG1, SPINT2	1395	7	13824	5.66267
GOTERM_BP_DIRECT	GO:0016126~sterol biosynthetic process	4	0.214018	0.0262381	CYB5R1, MSMO1, HMGCR, TM7SF2	1395	7	13824	5.66267
GOTERM_BP_DIRECT	GO:0046464~acylglycerol catabolic process	3	0.160514	0.0284391	ABHD12, ABHD2, ABHD6	1395	3	13824	9.90968
GOTERM_BP_DIRECT	GO:0035751~regulation of lysosomal lumen pH	3	0.160514	0.0284391	LRRK2, TMEM175, TMEM165	1395	3	13824	9.90968
GOTERM_BP_DIRECT	GO:0016267~O-glycan processing, core 1	3	0.160514	0.0284391	LOC523130, C1GALT1C1, C1GALT1	1395	3	13824	9.90968
GOTERM_BP_DIRECT	GO:2000189~positive regulation of cholesterol homeostasis	3	0.160514	0.0284391	SEC24A, NPC1, HNF4A	1395	3	13824	9.90968
GOTERM_BP_DIRECT	GO:0030282~bone mineralization	7	0.374532	0.0285677	KLF10, WNT11, PKDCC, ASPN, PHEX, FGFR2, LGR4	1395	24	13824	2.89032
GOTERM_BP_DIRECT	GO:0006695~cholesterol biosynthetic process	7	0.374532	0.0285677	IDI1, INSIG1, HMGCR, DHCR7, LSS, FDFT1, TM7SF2	1395	24	13824	2.89032
GOTERM_BP_DIRECT	GO:0008104~protein localization	10	0.535045	0.0332877	GNGT1, GRIN2A, ALS2, STK11IP, PLLP, WNK4, MAL, KIFAP3, TNS4, MLH3	1395	45	13824	2.20215
GOTERM_BP_DIRECT	GO:0050885~neuromuscular process controlling balance	10	0.535045	0.0332877	APP, CLN3, RBFOX1, GAA, HEXA, RAC3, SLC1A3, TPP1, ATP2B2, GIGYF2	1395	45	13824	2.20215
GOTERM_BP_DIRECT	GO:0097352~autophagosome maturation	5	0.267523	0.0350253	CLN3, VCP, SNX14, MCOLN1, VPS16	1395	13	13824	3.81141
GOTERM_BP_DIRECT	GO:0006665~sphingolipid metabolic process	5	0.267523	0.0350253	ST8SIA1, GBA, SERINC1, SERINC2, SERINC5	1395	13	13824	3.81141
GOTERM_BP_DIRECT	GO:0008299~isoprenoid biosynthetic process	5	0.267523	0.0350253	IDI1, COQ2, HMGCS1, HMGCR, FDFT1	1395	13	13824	3.81141
GOTERM_BP_DIRECT	GO:0030855~epithelial cell differentiation	11	0.58855	0.0369762	VIL1, FZD1, ACADVL, UPK1A, ELF3, PTER, DLX5, ANXA4, TPP1, FGFR2, CTSB	1395	53	13824	2.05673
GOTERM_BP_DIRECT	GO:0034976~response to endoplasmic reticulum stress	10	0.535045	0.037819	SCAMP5, UFL1, SRPX, XBP1, OS9, DDRGK1, FLOT1, FAM129A, P4HB, PDIA6	1395	46	13824	2.15428
GOTERM_BP_DIRECT	GO:0009267~cellular response to starvation	9	0.481541	0.0379982	KLF10, BMPR2, WNT2B, LRRK2, GBA, KIAA1324, INHBB, NUPR2, GLUL	1395	39	13824	2.28685
GOTERM_BP_DIRECT	GO:0090305~nucleic acid phosphodiester bond hydrolysis	8	0.428036	0.0431474	RIDA, RBBP8, EXO5, ENPP3, DNASE1, REXO2, RAD9B, DNASE1L1	1395	33	13824	2.40235
GOTERM_BP_DIRECT	GO:0006694~steroid biosynthetic process	6	0.321027	0.0444042	SDR42E1, HSD3B7, HINT2, CYP51A1, HSD3B1, LSS	1395	20	13824	2.9729
GOTERM_BP_DIRECT	GO:0005975~carbohydrate metabolic process	17	0.909577	0.0453784	IDUA, AMY2B, HEXB, B3GAT2, HEXA, GBA, SLC3A1, HEXDC, ABO, GNPDA1, FGGY, GLB1L, GLB1, SHPK, AMDHD2, PGM3, CHI3L1	1395	101	13824	1.66797
GOTERM_BP_DIRECT	GO:0043407~negative regulation of MAP kinase activity	7	0.374532	0.0485349	RGS14, SMPD1, GBA, CBLC, PTPN6, HMGCR, CDK5RAP3	1395	27	13824	2.56918
GOTERM_BP_DIRECT	GO:0006888~ER to Golgi vesicle-mediated transport	12	0.642055	0.0487836	COPB2, NRBP2, COPA, TRAPPC2L, SEC24A, LMAN2L, LMAN2, USO1, VTI1A, MIA3, YIF1A, LMF1	1395	63	13824	1.88756
GOTERM_BP_DIRECT	GO:0030336~negative regulation of cell migration	12	0.642055	0.0487836	RNF20, PTPRU, KANK1, WNT11, ADAM15, ABHD2, DAG1, ABHD6, MIA3, LDLRAD4, PTPRK, EPHA1	1395	63	13824	1.88756
GOTERM_BP_DIRECT	GO:0001503~ossification	9	0.481541	0.0494126	EXT1, EXT2, SLC26A2, THRA, AHSG, IGF2, FSTL3, CTGF, ATP6V1B1	1395	41	13824	2.1753
GOTERM_BP_DIRECT	GO:0016311~dephosphorylation	8	0.428036	0.0497878	THTPA, PFKFB2, ALPL, ACP2, ACPP, NT5C2, THNSL2, FBP2	1395	34	13824	2.33169
GOTERM_CC_DIRECT	GO:0005765~lysosomal membrane	62	3.31728	2.10514e-18	SLC35F6, SPPL2A, ECE1, TCIRG1, ATRAID, MFSD8, LAMP1, SMPD1, LAMP2, FLOT1, ENPP1, SLC26A11, ACP2, SPG11, VPS39, TMEM8A, HGSNAT, SLC30A3, STARD3NL, GAA, STX7, ATP11A, TMEM175, LMBRD1, NPC1, SPNS1, TMEM106B, ATP6V0D1, DAGLB, ACPP, ATP6V0C, SLC29A3, SIDT2, ATP6V1A, TMEM63A, RAB5C, HM13, GBA, TMEM165, CLN3, NCSTN, NEU1, ATP6V0A2, BOLA-DRA, TSPAN1, ATP6V1D, VPS16, CD164, STK11IP, TMEM192, CTNS, GLMP, M…	1562	180	15461	3.40938
GOTERM_CC_DIRECT	GO:0070062~extracellular exosome	336	17.9775	5.33003e-18	SLC46A3, APP, CISD1, CBLC, ABAT, CLDN2, F11R, FNBP1L, ZDHHC1, SLC4A4, MYLK, DAG1, PRSS8, THSD7A, PIP4K2C, KIFAP3, GLUL, TMEM8A, CUBN, ENTPD2, NHLRC3, ACTN2, FBXO2, P3H1, RNASE4, HOGA1, PDZK1, UPB1, HSPG2, CD2AP, SCAMP2, BCAM, CLDN3, MXRA8, GINM1, ATP6V0D1, PLPP3, TMEM63A, SLC22A5, TEX264, CFI, C15H11ORF52, NEDD4L, UMOD, XPC, PTTG1IP, IQGAP2, PPL, GNS, SLC5A5, PKHD1, CYB5R1, NCSTN, SYNGR2, HSPH1, …	1562	2162	15461	1.5383
GOTERM_CC_DIRECT	GO:0005764~lysosome	44	2.3542	1.47355e-11	ASAH1, HEXA, CTSZ, PRCP, CTSV, GNS, CTSS, GABARAP, CLN3, DRAM1, SMPD1, KIAA1324, NEU1, CTSH, CTSF, AGA, CTSD, RILP, CTSC, CTSB, CTSA, ARSA, ANKRD27, FUCA1, ARRDC3, GLMP, PRSS16, EPDR1, NAGA, MARCH8, TMEM175, LMBRD1, SYT11, GLB1, SNX14, NAAA, PLBD1, MAN2B1, DNASE2, TPP1, ADA, LGMN, PCYOX1, ITM2C	1562	141	15461	3.0888
GOTERM_CC_DIRECT	GO:0016021~integral component of membrane	534	28.5714	4.60081e-11	CHIC1, PGAP3, EQTN, CWH43, SPINT2, CLDN2, F11R, SLC4A4, NDST2, SCAMP5, RNF112, KRTCAP3, TMEM88, CIST1, LRAT, MPV17, TMEM8A, WLS, TMEM8B, LOC523130, TRIQK, LOC788587, TMEM80, SCAMP2, CLDN4, BCAM, CLDN3, RNF128, CLDN8, PSME4, ORAI3, AGTR1, RNF122, HACD4, MTDH, PCNX3, CYB5R1, GRIN2A, C29H11ORF24, RDH10, COX3, COX2, COX1, HMOX2, FDFT1, FZD1, SDR42E1, B3GALNT1, JAG1, CYP4F2, ABCA3, FZD6, TMEM192, ABCA…	1562	4185	15461	1.263
GOTERM_CC_DIRECT	GO:0005783~endoplasmic reticulum	93	4.97592	5.43271e-09	GHDC, SRPX, ATP8A1, LRRK2, CTSZ, ZDHHC1, CLU, PHEX, UFL1, AIFM3, UPK1A, CREB3L4, SLC26A11, SLC39A7, KIFAP3, SEC62, SIL1, TMEM8B, CUBN, GABARAPL1, CERS5, TRAPPC2L, DGAT2, CAMLG, VWF, FBXO2, ALG2, GPX7, P3H1, ELOVL6, ATP11A, ALG1, ELOVL7, TEX2, PDIA6, MR1, SLC39A14, SUMF2, SUMF1, ALDH3A2, BACE1, FNDC4, STIM1, NPC1, RNF128, CLDN8, ERP29, CHI3L1, EMID1, DNASE1L1, VCP, KLHL14, ATL1, YTHDC2, USO1, MGST…	1562	497	15461	1.85218
GOTERM_CC_DIRECT	GO:0005789~endoplasmic reticulum membrane	72	3.85233	4.04288e-08	POMT2, ERO1B, PIGN, FKBP14, MOGAT1, MSMO1, MIA3, PIGV, GBA2, TMEM189, UFL1, TMED3, LRAT, TMEM38B, UBXN4, TMED6, RHBDF1, PSENEN, VKORC1, TRIQK, ELOVL2, ALG5, ALG3, TMEM173, LSS, CYP39A1, POR, CYP2U1, TMEM214, CANX, TMEM106C, FKBP7, TMBIM6, PLPP3, RTN1, TMED10, LMAN2L, ATL1, PSEN2, MGST2, PSEN1, HMGCR, PLD3, LMF1, MTDH, PGRMC1, DDRGK1, LMAN2, RDH10, VTI1A, HMOX1, SC5D, KDSR, FDFT1, XBP1, SEC24A, MX…	1562	365	15461	1.95252
GOTERM_CC_DIRECT	GO:0030176~integral component of endoplasmic reticulum membrane	24	1.28411	5.43021e-07	SLC35B3, HACD1, DGAT2, ELOVL4, ELOVL5, ELOVL2, FITM2, DOLK, ELOVL6, ELOVL7, HACD3, MARCH6, TMCO1, TM7SF2, HACD4, EXT1, DCSTAMP, SEC61A1, PORCN, STIM1, DOLPP1, UBXN8, SARAF, DHCR7	1562	74	15461	3.21023
GOTERM_CC_DIRECT	GO:0000139~Golgi membrane	47	2.51471	8.37771e-07	GALNT12, COPB2, GALNT11, LEPROT, COPA, TMED10, NUMA1, LMAN2L, ATP8A1, TMEM167A, PGAP3, ATL1, GALNT18, PSEN2, ICA1, MIA3, C23H6ORF89, PSEN1, GBA2, GABARAP, FUT6, SCAMP5, NDST2, CSNK1B, GNPTAB, LMAN2, GCNT3, PMEPA1, RAB6B, RHBDF1, SLC35A2, GABARAPL2, B3GALNT1, SEC24A, COG4, SEC16A, GBF1, B3GALT4, POMGNT1, ZDHHC17, TNFRSF1A, TMCO1, EXT1, EXT2, B3GNT8, B3GNT3, COPG2	1562	217	15461	2.14385
GOTERM_CC_DIRECT	GO:0009986~cell surface	59	3.15677	2.22052e-05	CPM, APP, BMPR2, SPARC, CLSTN2, ITGB5, CLSTN1, ITGB2, PTPRK, MSLN, MRC1, ENPP1, ITGB7, ANXA9, LBP, ADAMTS9, TMEM8B, TNS1, ABCC2, SCARA5, IL1R1, ANXA4, F3, TGFBR1, TNFRSF1A, BACE1, DCSTAMP, BCAM, ADAM15, MXRA8, ERP29, VAMP1, CD46, PLA2R1, IGSF5, HM13, SDC2, SLC1A2, SLC1A3, PSEN1, IQGAP2, SCUBE3, WNT6, GRIN2A, SRPX2, EPCAM, LMAN2, CD59, BOLA-DRA, FGF22, FZD1, PRNP, ABCA7, IGF2R, SULF2, TREML2, PLXN…	1562	332	15461	1.75902
GOTERM_CC_DIRECT	GO:0042613~MHC class II protein complex	10	0.535045	3.84125e-05	DSB, LA-DQB, BOLA-DQA1, BOLA-DQA2, BOLA-DQB, BLA-DQB, BOLA-DRB3, BOLA-DRA, LOC100848815, BOLA-DMB	1562	19	15461	5.20958
GOTERM_CC_DIRECT	GO:0010008~endosome membrane	17	0.909577	0.000217484	CD164, LEPROT, PRAF2, VTA1, NCF4, TMEM175, TPCN1, TMEM165, DCSTAMP, SNX2, LAMP1, RAB15, CPTP, ERBB2, MRC1, ATP6V0A2, RILP	1562	60	15461	2.80449
GOTERM_CC_DIRECT	GO:0012505~endomembrane system	20	1.07009	0.000423748	DMTN, RTN1, TBC1D9B, ADPRHL1, TMEM167A, STX7, NBEAL1, AIG1, CYB5D2, LAPTM4B, NRBP2, PGRMC1, PGRMC2, MAP1LC3A, RNF128, SGSM3, RAC3, TSNARE1, WDFY4, CDK5RAP3	1562	82	15461	2.4142
GOTERM_CC_DIRECT	GO:0005768~endosome	28	1.49813	0.000809148	APP, LEPROT, ECE1, SNX30, AP4M1, TGOLN2, SMPD1, FLOT1, VPS11, ATP9B, VPS16, PACSIN1, TMEM184A, CUBN, NTRK2, ATP6V0B, SYT3, TGFB2, PRSS16, MARCH8, TGFBR1, TMEM175, BACE1, NPC1, OCIAD1, SLC26A7, STEAP1, STEAP2	1562	141	15461	1.9656
GOTERM_CC_DIRECT	GO:0005776~autophagosome	13	0.695559	0.0010513	GABARAPL2, SRPX, OSBPL7, ATG9A, GABARAP, TMEM230, CLN3, MAP1LC3A, RAB24, VTI1A, TBC1D12, PIP4K2C, VPS16	1562	44	15461	2.92447
GOTERM_CC_DIRECT	GO:0048471~perinuclear region of cytoplasm	57	3.04976	0.00124329	APP, TENM1, ECE1, ATRAID, CLU, PHEX, LAMP1, RAC3, LRAT, ENPP3, ATP7A, ABCD1, CTSB, SLC30A7, TRAPPC2L, DGAT2, FBXW8, ANXA4, STX7, USP2, ALG2, TMEM173, NPC1, RNF128, RNF207, CHI3L1, TLR4, DGKI, VCP, CUL7, MVP, USO1, PSEN2, NDRG2, CORO1B, THBS3, MTDH, PKHD1, HMOX1, STOM, TSPAN1, ATP9B, RAB11FIP4, SEC31A, TMEM184A, SYT5, SEC24A, DMTN, MX1, TMEM192, INHBB, EHD3, P2RX4, RAB15, NOX4, CALR, ITM2C	1562	369	15461	1.52899
GOTERM_CC_DIRECT	GO:0033179~proton-transporting V-type ATPase, V0 domain	5	0.267523	0.00131344	ATP6V0E1, TCIRG1, ATP6V0D1, ATP6V0E2, ATP6V0C	1562	6	15461	8.24851
GOTERM_CC_DIRECT	GO:0000220~vacuolar proton-transporting V-type ATPase, V0 domain	5	0.267523	0.00131344	ATP6V0B, ATP6V0A2, TCIRG1, ATP6V0C, ATP6V0A1	1562	6	15461	8.24851
GOTERM_CC_DIRECT	GO:0005793~endoplasmic reticulum-Golgi intermediate compartment	12	0.642055	0.00156404	TMED10, LMAN2L, RAB37, LMAN2, GBF1, TMED3, FN1, NUCB1, P4HB, RAB6B, PDIA6, YIF1A	1562	40	15461	2.96946
GOTERM_CC_DIRECT	GO:0005794~Golgi apparatus	74	3.95934	0.0033359	APP, ST6GALNAC2, ATP8A1, GORAB, GOLIM4, CASC4, PHEX, CTGF, NDST2, LAPTM4A, POFUT2, MECOM, CREB3L4, NAPRT, TMED3, TRAPPC11, SLC26A11, KIFAP3, LARGE1, UNC13B, PSENEN, SLC30A7, CUBN, GABARAPL1, TRAPPC2L, FBXW8, TMEM173, SLC39A14, BACE1, BACE2, NPC1, RNF128, TMEM214, CPTP, FAM20C, PLPP3, EMID1, XPR1, GLYR1, COPB2, CUL7, PKDCC, ATL1, GLT8D1, GLT8D2, PSEN1, NDRG2, TM9SF4, LMF1, NCSTN, DPP7, MYO6, VTI1A…	1562	528	15461	1.38725
GOTERM_CC_DIRECT	GO:0031090~organelle membrane	11	0.58855	0.00359776	PGRMC1, MAP1LC3A, CYP2U1, RDH10, FBXO2, CYP51A1, MGST2, SLC39A8, FMO5, RPE65, TM7SF2	1562	38	15461	2.86527
GOTERM_CC_DIRECT	GO:0000421~autophagosome membrane	7	0.374532	0.00486974	VMP1, GABARAPL2, TM9SF1, GABARAPL1, MAP1LC3A, ATG9A, GABARAP	1562	17	15461	4.07573
GOTERM_CC_DIRECT	GO:0045121~membrane raft	21	1.1236	0.00664364	APP, PRNP, ANGPT1, PLLP, CBLC, PSEN1, ERLIN2, ARID3C, DLL1, TGFBR1, TNFRSF1A, BACE1, LAT2, LAMP1, NPC1, SMPD1, FLOT1, BTK, DAG1, STOM, CARD11	1562	110	15461	1.88966
GOTERM_CC_DIRECT	GO:0042470~melanosome	15	0.802568	0.0105882	ANKRD27, TMED10, RAB5C, CLTC, CTNS, SYTL2, LAMP1, ERP29, RAB29, FLOT1, TPP1, P4HB, CTSD, ATP6V0A1, CTSB	1562	71	15461	2.09117
GOTERM_CC_DIRECT	GO:0016323~basolateral plasma membrane	19	1.01659	0.0107473	DSP, CHRM3, NDRG4, SLC40A1, NOD1, UMOD, ATP1A1, ATP1B1, SLC4A4, BEST1, EPCAM, CLDN8, ERBB2, FLOT1, SLC39A5, SLC26A7, CDH16, ATP7A, ATP6V1B1	1562	100	15461	1.88066
GOTERM_CC_DIRECT	GO:0005604~basement membrane	12	0.642055	0.0115088	LAD1, COL18A1, CCDC80, CD151, SPARC, COL4A2, COL4A1, ADAMTS1, NTN4, DAG1, RELL2, MATN2	1562	51	15461	2.32899
GOTERM_CC_DIRECT	GO:0031012~extracellular matrix	21	1.1236	0.0119017	FBN2, TGFB2, MMP7, JUP, VWF, CPXM2, TGFB3, AHSG, TFPI2, HTRA1, LTBP3, H4, CFP, F3, CLU, HSPG2, MMP15, MMP19, IGFBP7, LMCD1, FGFR2	1562	116	15461	1.79192
GOTERM_CC_DIRECT	GO:0005615~extracellular space	118	6.31354	0.0125259	APP, SPON1, SPARC, METRNL, FGF2, CLU, VPREB3, LGALS4, C4A, LAMP2, DAG1, ENPP1, PRSS8, SIL1, HGF, IGFBP2, HSPG2, BTC, PLBD1, HDGFL1, CES2, CFI, WNT6, FLRT2, IGFBP7, A2M, RAB11FIP4, TGFB2, TGFB3, TNFSF15, ABCA3, FUCA2, IGF2, A2ML1, INHBB, BMP6, EXT2, MAN2B1, CALR, FBN1, DDR1, IL21, CPM, COL18A1, UCN, NRP1, BMPR2, SERPINA14, ECM2, WNT2B, CPXM2, LRRK2, CTSZ, VLDLR, CTSV, CPZ, CTSS, SERPINA5, SMPD1, C…	1562	950	15461	1.22946
GOTERM_CC_DIRECT	GO:0070469~respiratory chain	6	0.321027	0.0131871	ND6, COX2, COX1, CYTB, ND2, ND5	1562	15	15461	3.95928
GOTERM_CC_DIRECT	GO:0016471~vacuolar proton-transporting V-type ATPase complex	5	0.267523	0.0131994	ATP6V0A2, TCIRG1, ATP6V0D1, ATP6V0A1, ATP6V1B1	1562	10	15461	4.9491
GOTERM_CC_DIRECT	GO:0005887~integral component of plasma membrane	102	5.45746	0.0189146	CHRM3, OXTR, TNFRSF6B, CD82, CHRM4, SLC4A4, BEST1, SLC39A5, SLC39A8, SLC26A11, EPHB2, SLC16A3, TNFRSF4, PDGFRA, SEMA6A, SLC6A17, SCARA5, KCNK17, PLPP5, CLDN4, STIM1, SCNN1A, STEAP1, PLA2R1, EPHA1, PLPP3, STEAP2, SLC26A2, CD151, SLC22A5, PSEN2, PSEN1, SLC5A5, NCSTN, FLRT2, TSPAN8, TSPAN6, TSPAN7, TSPAN1, CADM4, SLC52A2, SLC52A3, TRPV4, SLCO1A2, REEP2, PLXNB2, SLC26A7, FGFR4, FGFR2, GPR19, DDR1, TE…	1562	820	15461	1.23124
GOTERM_CC_DIRECT	GO:0030672~synaptic vesicle membrane	9	0.481541	0.0209347	SYT5, SCAMP5, SYNGR2, SLC6A17, SLC30A3, ICA1, VAMP1, SLC17A6, STX1A	1562	35	15461	2.54525
GOTERM_CC_DIRECT	GO:0016324~apical plasma membrane	26	1.39112	0.0223122	ATP6V1A, SLC22A5, ITGB3, PSEN2, UMOD, TCIRG1, ATP1A1, SLC2A5, DLL1, CFAP126, PKHD1, MUC1, UPK1A, EPCAM, ERBB2, CUBN, SLC34A2, JAG1, ABCC2, ANXA4, FN1, ABCA7, ATP2B2, ATP1B1, SCNN1A, ATP6V1B1	1562	163	15461	1.57886
GOTERM_CC_DIRECT	GO:0005770~late endosome	15	0.802568	0.0232619	ANKRD27, STX7, PIK3R4, TMEM192, CTNS, TMEM230, IGF2R, CLN3, RNF128, SNX14, KIAA1324, SDF4, ATP7A, RILP, VPS16	1562	78	15461	1.9035
GOTERM_CC_DIRECT	GO:0031902~late endosome membrane	10	0.535045	0.025581	SLC30A3, LAMP2, ATG9A, SPPL2A, VTI1A, TMEM106B, BOLA-DRA, SLC29A3, VPS39, VPS16	1562	43	15461	2.30191
GOTERM_CC_DIRECT	GO:0030140~trans-Golgi network transport vesicle	5	0.267523	0.0264141	TGOLN2, TMED10, ATP7A, STEAP2, IGF2R	1562	12	15461	4.12425
GOTERM_CC_DIRECT	GO:0005790~smooth endoplasmic reticulum	5	0.267523	0.0264141	APP, PLCB4, SYVN1, PSEN1, GABARAP	1562	12	15461	4.12425
GOTERM_CC_DIRECT	GO:0030134~ER to Golgi transport vesicle	6	0.321027	0.0291738	APP, LMAN2L, LMAN2, YIPF5, YIF1A, SEC31A	1562	18	15461	3.2994
GOTERM_CC_DIRECT	GO:0030424~axon	19	1.01659	0.034104	NRP1, APP, TGFB2, HOMER1, MME, ATL1, LRRK2, PSEN1, PTPRK, GDPD5, BACE1, C4A, CALB1, CNR1, DVL1, SLC38A7, EPHB2, SPG11, ADGRL3	1562	113	15461	1.6643
GOTERM_CC_DIRECT	GO:0043025~neuronal cell body	21	1.1236	0.0343374	SYT5, RIC3, TGFB2, KLHL14, ELOVL5, PSEN2, SLC1A3, ATP2B2, PSEN1, PTPRK, GDPD5, PTPRF, CALB1, PSD2, PPP1R1B, SLC38A7, RAC3, ANG, EPHB2, IL6ST, SCN1A	1562	129	15461	1.61134
GOTERM_CC_DIRECT	GO:0031966~mitochondrial membrane	10	0.535045	0.0381051	ND6, C1H21ORF33, HSD3B1, SORD, PEMT, SLC25A10, TMBIM6, SFXN2, TAZ, CLU	1562	46	15461	2.15178
GOTERM_CC_DIRECT	GO:0005925~focal adhesion	43	2.3007	0.0422524	FBLN7, NRP1, GRB7, CD151, ITGB5, HACD3, SYNE2, CORO1B, DCAF6, MRC2, AKAP12, LIMA1, CNN1, NCSTN, FLRT2, FLOT1, DAG1, ATP6V0A2, CD59, ITGB6, TNS4, MISP, TNS1, FZD1, GSN, JUP, MME, ACTN2, ITGA1, REXO2, HSPG2, IGF2R, FERMT1, EHD3, DAB2, CAT, MYH9, CD9, CALR, P4HB, CD46, ATP6V0C, LIMS2	1562	318	15461	1.33844
GOTERM_CC_DIRECT	GO:0036126~sperm flagellum	5	0.267523	0.045413	ABHD2, DNAJB13, NME5, IQCG, AK8	1562	14	15461	3.53507
GOTERM_CC_DIRECT	GO:0030175~filopodium	9	0.481541	0.0497429	VIL1, FGD4, KITLG, ACTN2, PDPN, DAG1, IQGAP2, PPP1R9A, ACPP	1562	41	15461	2.17278
GOTERM_MF_DIRECT	GO:0004497~monooxygenase activity	12	0.642055	0.00013762	CYP27A1, CYP26A1, LOC509506, LOC534967, CYP4F2, CYP1A2, TBXAS1, LOC511498, CYP1A1, CYP2C18, COQ6	1280	32	13095	3.83643
GOTERM_MF_DIRECT	GO:0020037~heme binding	26	1.39112	0.000200754	CYP2C18, CYB5D2, PGRMC1, PGRMC2, LOC521656, HMOX1, COX1, ADGB, LOC509506, LOC534967, AMBP, CYP4F2, CYP51A1, LOC530929, CYP39A1, CYP27A1, CYP26A1, CYP2U1, CYP2C87, CYP1A2, TBXAS1, LOC511498, CAT, CYP1A1, CYTB	1280	120	13095	2.2166
GOTERM_MF_DIRECT	GO:0004185~serine-type carboxypeptidase activity	7	0.374532	0.000257247	CTSA, CPM, SCPEP1, DPP7, PRSS16, PRCP, CPZ	1280	11	13095	6.5103
GOTERM_MF_DIRECT	GO:0001948~glycoprotein binding	14	0.749064	0.000512971	FGB, VWF, FBXO2, LRRK2, EDEM2, ITGB2, VLDLR, IGF2R, GFAP, ERLEC1, OS9, LMAN2, FBXO6, CALR	1280	48	13095	2.98389
GOTERM_MF_DIRECT	GO:0016705~oxidoreductase activity, acting on paired donors, with incorporation or reduction of molecular oxygen	11	0.58855	0.000659982	CYP27A1, CYP26A1, LOC509506, LOC534967, CYP4F2, TBXAS1, LOC511498, CYP1A1, CYP2C18, P4HTM	1280	32	13095	3.51672
GOTERM_MF_DIRECT	GO:0046961~proton-transporting ATPase activity, rotational mechanism	9	0.481541	0.00103991	ATP6V1A, ATP6V0B, ATP6V0E1, ATP6V0A2, TCIRG1, ATP6V0D1, ATP6V0E2, ATP6V0C, ATP6V0A1	1280	23	13095	4.00323
GOTERM_MF_DIRECT	GO:0005506~iron ion binding	27	1.44462	0.00120934	MSMO1, CYP2C18, LOC521656, SC5D, COX1, P4HTM, LOC509506, LOC534967, CYP4F2, CYP51A1, P3H1, LOC530929, CYP39A1, CYP27A1, CYP26A1, TMLHE, CYP2U1, CYP2C87, P4HA2, CYP1A2, TBXAS1, LOC511498, CYP1A1, ACO2, PPEF1, FTL	1280	142	13095	1.94523
GOTERM_MF_DIRECT	GO:0015179~L-amino acid transmembrane transporter activity	6	0.321027	0.00146031	SLC7A4, SLC7A7, LOC518422, SLC43A2, SLC38A7, LOC506670	1280	10	13095	6.13828
GOTERM_MF_DIRECT	GO:0005385~zinc ion transmembrane transporter activity	8	0.428036	0.0020619	SLC30A7, SLC30A3, SLC39A5, SLC39A10, SLC39A8, SLC39A7, SLC39A2, SLC39A14	1280	20	13095	4.09219
GOTERM_MF_DIRECT	GO:0005509~calcium ion binding	78	4.17335	0.00206946	PLA2G2D1, ANXA8L1, SPARC, LOC524650, CLSTN2, FKBP14, CLSTN1, CBLC, VLDLR, CELSR1, EFEMP2, CALB1, GNPTAB, EFCAB2, STAB1, DAG1, SDF4, ANXA9, PAMR1, HABP2, ARSA, CUBN, ACTN2, PCDHGA2, ANXA4, EPDR1, PCDHA13, HSPG2, ASPN, SYTL2, PLCB4, STIM1, MMP15, CANX, FAM20C, MMP19, FKBP7, PADI4, PPEF1, CDH16, MATN4, MYL9, MATN2, FBLN7, FBN2, CANT1, TBC1D9B, DNAH7, UMOD, VWCE, LTBP3, NOL3, DLL1, LTBP1, FSTL1, THBS…	1280	571	13095	1.39751
GOTERM_MF_DIRECT	GO:0030165~PDZ domain binding	8	0.428036	0.00283516	PLEKHA1, TMEM88, KIDINS220, SDC2, ATP2B2, PSEN1, PDZK1, F11R	1280	21	13095	3.89732
GOTERM_MF_DIRECT	GO:0009922~fatty acid elongase activity	5	0.267523	0.00459378	ELOVL4, ELOVL5, ELOVL2, ELOVL6, ELOVL7	1280	8	13095	6.39404
GOTERM_MF_DIRECT	GO:0102338~3-oxo-lignoceronyl-CoA synthase activity	5	0.267523	0.00459378	ELOVL4, ELOVL5, ELOVL2, ELOVL6, ELOVL7	1280	8	13095	6.39404
GOTERM_MF_DIRECT	GO:0102337~3-oxo-cerotoyl-CoA synthase activity	5	0.267523	0.00459378	ELOVL4, ELOVL5, ELOVL2, ELOVL6, ELOVL7	1280	8	13095	6.39404
GOTERM_MF_DIRECT	GO:0102336~3-oxo-arachidoyl-CoA synthase activity	5	0.267523	0.00459378	ELOVL4, ELOVL5, ELOVL2, ELOVL6, ELOVL7	1280	8	13095	6.39404
GOTERM_MF_DIRECT	GO:0015078~hydrogen ion transmembrane transporter activity	7	0.374532	0.00567645	ATP6V0B, ATP8, ATP6, TCIRG1, ATP6V0C, ATP6V0A1, ATP6V1B1	1280	18	13095	3.97852
GOTERM_MF_DIRECT	GO:0003995~acyl-CoA dehydrogenase activity	6	0.321027	0.00581025	ACAD8, ACOX2, ACOX3, ACADM, ACADS, ACADSB	1280	13	13095	4.72175
GOTERM_MF_DIRECT	GO:0008201~heparin binding	20	1.07009	0.00659412	TMEM184A, APP, ECM2, SERPINC1, APLP2, ANXA4, FN1, FGF2, FSTL1, PTPRF, THBS3, SERPINA5, CTGF, CCDC80, GPNMB, ADAMTS1, COL5A3, ANG, FGFR4, FBN1	1280	106	13095	1.93028
GOTERM_MF_DIRECT	GO:0004519~endonuclease activity	8	0.428036	0.00828973	RIDA, EME2, ANG2, LOC538679, RNASE4, ANG, TSEN2, DNASE1L1	1280	25	13095	3.27375
GOTERM_MF_DIRECT	GO:0000062~fatty-acyl-CoA binding	8	0.428036	0.00828973	ACAD8, ACADVL, ACOX2, ECI2, ACOX3, ACADM, ACADS, ACADSB	1280	25	13095	3.27375
GOTERM_MF_DIRECT	GO:0052890~oxidoreductase activity, acting on the CH-CH group of donors, with a flavin as acceptor	6	0.321027	0.00832048	ACAD8, ACADVL, ACOX2, ACOX3, ACADM, ACADSB	1280	14	13095	4.38449
GOTERM_MF_DIRECT	GO:0004197~cysteine-type endopeptidase activity	10	0.535045	0.00944979	CTSZ, CTSH, ATG4A, CTSV, CTSF, USP30, CTSS, CTSC, CTSB, LGMN	1280	38	13095	2.69223
GOTERM_MF_DIRECT	GO:0001540~beta-amyloid binding	8	0.428036	0.0104074	BACE1, BACE2, TGFB2, TM2D1, FBXO2, CLSTN1, APBB3, ITM2C	1280	26	13095	3.14784
GOTERM_MF_DIRECT	GO:0005518~collagen binding	6	0.321027	0.0114925	SPARC, VWF, RELL2, ASPN, CTSS, CTSB	1280	15	13095	4.09219
GOTERM_MF_DIRECT	GO:0050660~flavin adenine dinucleotide binding	13	0.695559	0.0120695	ACAD8, ACADVL, MTHFR, FMO5, ACADSB, SQLE, POR, AIFM3, ACOX2, D2HGDH, ACOX3, ACADM, ACADS	1280	60	13095	2.2166
GOTERM_MF_DIRECT	GO:0008484~sulfuric ester hydrolase activity	5	0.267523	0.0170558	ARSK, IDS, ARSG, ARSE, SGSH	1280	11	13095	4.65021
GOTERM_MF_DIRECT	GO:0016787~hydrolase activity	19	1.01659	0.0182193	IDI1, ENTPD2, ABHD4, EPHX3, EXOG, NUDT16L1, BPHL, HDHD3, NDST2, PLPP6, GNPDA1, ACAP1, HINT2, PLBD1, NUDT17, AGA, DAGLB, ATP6V0C, CES2	1280	109	13095	1.78329
GOTERM_MF_DIRECT	GO:0042802~identical protein binding	22	1.1771	0.021451	GRB7, PRNP, CCDC155, OAT, TGFB3, PHYKPL, EED, ATL1, ANXA4, USP2, USO1, NT5C2, CLDN2, FHIT, ASS1, ALAD, CLDN4, TTR, SRPX2, CLDN3, ACPP, GLUL	1280	135	13095	1.66719
GOTERM_MF_DIRECT	GO:0016853~isomerase activity	4	0.214018	0.0240801	HSD3B7, ENOSF1, PDIA6, PBLD	1280	7	13095	5.84598
GOTERM_MF_DIRECT	GO:0005520~insulin-like growth factor binding	4	0.214018	0.0240801	HTRA1, IGF2R, CTGF, IGF1R	1280	7	13095	5.84598
GOTERM_MF_DIRECT	GO:0015020~glucuronosyltransferase activity	6	0.321027	0.0256409	CSGALNACT1, UGT2B10, EXT2, UGT1A1, LARGE1, LOC781988	1280	18	13095	3.41016
GOTERM_MF_DIRECT	GO:0016263~glycoprotein-N-acetylgalactosamine 3-beta-galactosyltransferase activity	3	0.160514	0.0267391	LOC523130, C1GALT1C1, C1GALT1	1280	3	13095	10.2305
GOTERM_MF_DIRECT	GO:0005543~phospholipid binding	10	0.535045	0.0316389	BAIAP2L2, MAP1LC3A, PSD2, CPTP, PTAFR, NBEAL1, WDFY4, F3, SPTBN1, PACSIN1	1280	46	13095	2.22401
GOTERM_MF_DIRECT	GO:0005089~Rho guanyl-nucleotide exchange factor activity	12	0.642055	0.0325183	FGD3, FGD4, DOCK11, FARP1, ALS2CL, ARHGEF28, ARHGEF16, SPATA13, ARHGEF3, ARHGEF10L, ARHGEF40, ARHGEF5	1280	61	13095	2.01255
GOTERM_MF_DIRECT	GO:0030246~carbohydrate binding	16	0.856073	0.0325412	GALNT12, FCN1, GALNT11, FBXO2, GALNT18, GAA, ANXA4, LGALS4, OS9, CHI3L1, MAN2B1, FBXO6, CALR, PLA2R1, ADGRL2, ADGRL3	1280	92	13095	1.77921
GOTERM_MF_DIRECT	GO:0015194~L-serine transmembrane transporter activity	4	0.214018	0.0357719	SLC38A7, SERINC1, SERINC2, SERINC5	1280	8	13095	5.11523
GOTERM_MF_DIRECT	GO:0071949~FAD binding	6	0.321027	0.0394339	CYB5R1, MICAL3, D2HGDH, PRODH, DDO, COQ6	1280	20	13095	3.06914
GOTERM_MF_DIRECT	GO:0008234~cysteine-type peptidase activity	5	0.267523	0.0408644	SENP7, CTSZ, CTSH, CTSC, CTSB	1280	14	13095	3.65374
GOTERM_MF_DIRECT	GO:0005198~structural molecule activity	22	1.1771	0.0429002	FGB, DSP, COL18A1, COPB2, LAD1, COPA, JUP, CLTC, KRT8, CLDN2, KRT85, GFAP, CLDN4, KRT18, CLDN3, CLDN15, CLDN8, KRT15, MAP7, COPG2, LOC615589	1280	145	13095	1.55221
GOTERM_MF_DIRECT	GO:0046872~metal ion binding	129	6.90209	0.0494884	ZNF331, FCN1, ZNF692, SPON1, ZBTB25, ZNF292, RFESD, CISD1, ABAT, MYLK, DHX57, PAPOLG, PHYHD1, ENPP1, NUDT17, ENPP3, ZNF565, NUDT12, UNC13B, ZNF283, RSAD1, ZBTB37, USP2, EBF1, ZNF12, ARHGAP45, ZFYVE16, ACAP1, THAP5, ZNF93, BTK, ZNF436, IDI1, CASZ1, LMAN2L, ARHGEF28, GNS, GLIS2, TKFC, AMDHD2, ZNF704, ZNF428, ZKSCAN8, ARSK, ZNF548, HMOX1, PDZD8, ZBED5, ZNF784, PRNP, ZNF143, ZNF263, NARFL, LOC508131,…	1280	1142	13095	1.15563
