# Supplementary material for: Transcriptomic Analysis of MDBK Cells Infected with Cytopathic and Non-Cytopathic Strains of Bovine Viral Diarrhea Virus (BVDV)
Source: Viruses. 2022 Jun 11;14(6):1276. doi: 10.3390/v14061276 (PMC9228727; doi:10.3390/v14061276)
Supplement: Supplementary file 1 [file viruses-14-01276-s001.zip › Table S7_GO enrichment results of the DEGs 72h p.i. with cp strain.xlsx]

## Sheet: Arkusz1
Enrichment results of GO by genes with increased expression 72h p.i. with strain cp
Category	Term	Count	%	PValue	Genes	List Total	Pop Hits	Pop Total	Fold Enrichment
GOTERM_BP_DIRECT	GO:0051301~cell division	36	2.24719	1.64029e-07	RB1, CDCA2, CETN2, CIB1, ARPP19, NCAPH, SKA1, GNAI1, CKS1B, AURKA, CCNB2, FZR1, DSN1, CCNB1, CCND2, PTTG1, CCND1, SPDL1, FAM83D, SEPT10, KLHL21, VRK1, CDC6, SEPT5, CDC40, CCNA2, TPX2, KIF2A, CCNE2, REEP4, CDK2, CDK1, CKS2, BIRC5, SPC24	1266	150	13824	2.62066
GOTERM_BP_DIRECT	GO:0042127~regulation of cell proliferation	35	2.18477	2.58066e-07	CD40, CXCL8, CDCA7, TNFRSF11B, CIB1, CXCL3, NDRG1, SAT1, CXCL5, HHEX, ERBB3, PLAU, CHEK1, PTK2B, ABL2, JAK2, RELT, EGLN3, JUN, JUND, FANCL, PLA2G4A, LOC510798, TYK2, TNFRSF1B, TNFRSF10D, NFKBIA, TEC, BCL6, MAFG, FAS, SGK3, PLCD1, FRK, EZH2	1266	146	13824	2.61767
GOTERM_BP_DIRECT	GO:0006915~apoptotic process	43	2.68414	4.11039e-07	PPP1R15A, RB1, CYFIP2, RTN3, CLIC4, BEX2, TNFAIP8, CITED1, ECSCR, CDCA7, CIB1, ZFP36L1, LGALS1, CASP8, BNIP1, PIM1, BNIP2, SUDS3, MAP3K7, SMNDC1, BCL2L14, BCL2L15, EGLN3, RIPK2, SIAH2, CSNK2A2, CIDEA, CKAP2, TICAM1, GADD45G, NR4A1, TPX2, DLC1, IRF1, DDIT3, C27H8ORF4, CDK1, BIRC5, FAS, XAF1, OGT, DAP3	1266	204	13824	2.30164
GOTERM_BP_DIRECT	GO:0043066~negative regulation of apoptotic process	45	2.80899	1.11946e-05	BCL2A1, AMIGO2, FHL2, TWIST1, CIB1, CYR61, HSP90B1, AQP1, AURKA, INSL6, SOCS3, CASP3, PIM1, PTK2B, NCKAP1L, PIM2, MSX1, AAMDC, IER3, BARD1, STAT5B, PLK3, SERPINB2, BNIP3, PLK2, PLK1, ASNS, HMGA2, HIPK3, VEGFA, DNAJC3, IL6, HAX1, BCL6, IL7, CTH, MDM2, CDK1, BIRC5, SPRY2, FAS, ANGPTL4, CARD14, NAIP	1266	246	13824	1.99746
GOTERM_BP_DIRECT	GO:0007049~cell cycle	22	1.37328	9.30502e-05	SEPT10, BEX2, HACE1, SMARCB1, UHRF1, DIXDC1, CKAP2, SEPT5, GNAI1, RAB11A, THAP1, RGS2, CHAF1A, CCND2, NASP, CCNE2, PIM1, MCM5, MCM6, MNAT1, AVPI1, LIN52	1266	94	13824	2.55561
GOTERM_BP_DIRECT	GO:0032496~response to lipopolysaccharide	20	1.24844	0.000140494	PTGER4, CD40, JUND, CXCL8, CITED1, GCH1, HMGB2, TNFRSF11B, LOC510798, CXCL3, TNFRSF1B, CXCL5, TNFRSF10D, NFKBIA, DUSP10, MAPKAPK3, NOCT, PELI1, FAS, RELT	1266	83	13824	2.63119
GOTERM_BP_DIRECT	GO:0043065~positive regulation of apoptotic process	27	1.68539	0.000156449	BCL2A1, DCUN1D3, SAV1, BCL2L11, AIFM2, ADAMTSL4, SUDS3, SOX4, BARD1, RIPK2, GADD45A, BNIP3, OSGIN1, HMGA2, DUSP6, GADD45G, NET1, MLLT11, NR4A1, BMP2, IL6, MELK, BCL6, KCNMA1, ITGA6, IRF5, ATF4	1266	133	13824	2.21673
GOTERM_BP_DIRECT	GO:0007067~mitotic nuclear division	23	1.43571	0.000174207	CDCA2, CENPW, TTYH1, CETN2, PLK1, KLHL21, VRK1, ARPP19, GEM, SKA1, CCNA2, CCNB2, WEE1, SNX18, PTTG1, REEP4, CDK2, NUF2, CDK1, CENPN, FAM83D, SPC24	1266	105	13824	2.39188
GOTERM_BP_DIRECT	GO:0001578~microtubule bundle formation	9	0.561798	0.000673674	TPPP3, PRC1, MAP2, MTCL1, MAP1B, PLK1, CHP1, KIF20A, TPPP	1266	23	13824	4.27282
GOTERM_BP_DIRECT	GO:0000082~G1/S transition of mitotic cell cycle	12	0.749064	0.000689892	CDKN2D, PPP3CA, PLK3, CDKN1A, CCND1, CCNE2, PLK2, CDK2, CAMK2A, EIF4EBP1, PIM2, CRLF3	1266	40	13824	3.27583
GOTERM_BP_DIRECT	GO:0001666~response to hypoxia	17	1.06117	0.000768805	EGLN3, CHRNA7, CAV1, CXCR4, VEGFC, PLAT, AGER, VEGFA, LOXL2, HSP90B1, NR4A2, BMP2, PLAU, MB, KCNMA1, DDIT4, UCP2	1266	73	13824	2.54288
GOTERM_BP_DIRECT	GO:0001525~angiogenesis	25	1.56055	0.00103205	RAMP2, CLIC4, SERPINE1, ECSCR, RORA, CIB1, RBPJ, SAT1, RASIP1, ELK3, ESM1, HEY1, PTK2B, ITGAV, EPHB3, JUN, CAV1, IL18, VEGFC, VEGFA, NOV, ACKR3, TGFBI, ANGPTL4, PLCD1	1266	134	13824	2.03721
GOTERM_BP_DIRECT	GO:0001558~regulation of cell growth	11	0.686642	0.00110163	RB1, IGFBP1, ESM1, IGFBPL1, CLSTN3, FAM107A, CRIM1, SGK3, IGFBP6, KAZALD1, CYR61	1266	36	13824	3.33649
GOTERM_BP_DIRECT	GO:0018105~peptidyl-serine phosphorylation	22	1.37328	0.00113889	HIPK4, PRKCI, MAST3, TNKS, PLK2, MAST2, PLK1, CAMK2A, STK39, LMTK2, ILK, VRK1, HIPK3, TTBK2, MAPKAPK3, CDK2, CDK1, STK38L, MAPKAPK5, SGK3, PRKCQ, PKN2	1266	112	13824	2.14489
GOTERM_BP_DIRECT	GO:0007264~small GTPase mediated signal transduction	33	2.05993	0.00115919	DOCK4, RRAD, ARL1, RHOBTB3, ARHGAP18, RND2, RND3, RND1, ARL5B, RASD1, RRAS, RAC2, CHML, RAB6A, RALGPS2, RAB2B, RAB4A, RAB39A, RHOD, GEM, RAB33A, RAB11A, RAB10, ARL4C, RABIF, MRAS, RAB13, RAB9A, RHOV, RAB7B, RHEBL1, RAPGEF3, RHOQ	1266	199	13824	1.81076
GOTERM_BP_DIRECT	GO:0007265~Ras protein signal transduction	10	0.62422	0.00137705	RB1, CCNA2, RASSF1, RALA, JUN, CDKN1A, CDK2, RRAS2, MAPKAPK5, KRAS	1266	31	13824	3.5224
GOTERM_BP_DIRECT	GO:0008285~negative regulation of cell proliferation	34	2.12235	0.00251988	RB1, CDKN1A, SMARCB1, BTG1, SERPINE2, KMT2A, CIB1, GATA3, RBPJ, TOB1, NDRG1, C24H18ORF54, FTH1, RASSF5, PTK2B, PIM2, MSX1, SOX4, CDKN2D, MAP2K1, JUN, HMGA1, VEGFC, TSC1, KLF4, EREG, BMP2, ZEB1, BCL6, DLC1, IRF1, SPRY2, SPRY1, NF2	1266	217	13824	1.71088
GOTERM_BP_DIRECT	GO:0045143~homologous chromosome segregation	4	0.249688	0.00284895	ESPL1, PTTG1, PLK1	1266	4	13824	10.9194
GOTERM_BP_DIRECT	GO:0042981~regulation of apoptotic process	22	1.37328	0.00306589	CD40, GLS2, DUSP1, GDF15, CIDEB, TNFRSF11B, MITF, LOC510798, TNFRSF1B, TNFRSF10D, INHBE, BMP2, PINK1, SLK, CASP8, RASSF5, ANP32E, SGK3, JAK2, RELT, BCL2L14, BIRC3	1266	121	13824	1.98535
GOTERM_BP_DIRECT	GO:0006816~calcium ion transport	11	0.686642	0.00319073	PPP3CA, RAMP2, CAV1, CCL5, CHRNA7, CAMK2A, NMUR2, ITPR3, SELENOK, KCNN4, SLC8A1	1266	41	13824	2.9296
GOTERM_BP_DIRECT	GO:0051092~positive regulation of NF-kappaB transcription factor activity	18	1.1236	0.00336964	CD40, PRKCI, TRIM52, RIPK2, CAMK2A, CIB1, TRAPPC9, TRAF1, TICAM1, AGER, TRIM8, CTH, PRKCQ, ARHGEF2, RAB7B, RHEBL1, MAP3K13, CARD14	1266	91	13824	2.15989
GOTERM_BP_DIRECT	GO:0031668~cellular response to extracellular stimulus	6	0.374532	0.00438074	FOSL1, NR4A2, ADORA2B, ITGA6, FOS, ASGR1	1266	13	13824	5.03974
GOTERM_BP_DIRECT	GO:0000281~mitotic cytokinesis	8	0.499376	0.0045411	SNX18, RACGAP1, STMN1, PLK1, NUSAP1, CKAP2, KIF20A, CEP55	1266	24	13824	3.63981
GOTERM_BP_DIRECT	GO:0071456~cellular response to hypoxia	12	0.749064	0.00477813	NPEPPS, PINK1, RGCC, LMNA, MDM2, TWIST1, HYOU1, RORA, ANGPTL4, NDRG1, VEGFA, AQP1	1266	50	13824	2.62066
GOTERM_BP_DIRECT	GO:0090200~positive regulation of release of cytochrome c from mitochondria	7	0.436954	0.00554154	MLLT11, PINK1, BCL2L11, BNIP3, PLAUR, CIDEB, MMP9	1266	19	13824	4.02295
GOTERM_BP_DIRECT	GO:0071356~cellular response to tumor necrosis factor	13	0.811486	0.0055454	CXCL8, CCL20, RORA, CIB1, SLC2A4, GATA3, YBX3, CX3CL1, BAG4, ZFP36, IL6, CCL5, CCL17	1266	58	13824	2.44746
GOTERM_BP_DIRECT	GO:0098779~mitophagy in response to mitochondrial depolarization	20	1.24844	0.00607011	SERPINB10, MAP2K1, ZNF593, REP15, SLC35C1, DKKL1, SLC1A4, HSF2BP, GMIP, MEX3C, HK2, NUP93, CHAF1B, PINK1, SNRPD1, PEX3, FAM131B, ASB2, PFKP, PDK1	1266	112	13824	1.9499
GOTERM_BP_DIRECT	GO:1903912~negative regulation of endoplasmic reticulum stress-induced eIF2 alpha phosphorylation	4	0.249688	0.00663698	DNAJC3, PPP1R15A, PPP1R15B, NCK2	1266	5	13824	8.73555
GOTERM_BP_DIRECT	GO:0072655~establishment of protein localization to mitochondrion	4	0.249688	0.00663698	PINK1, DDIT3, HK2, HK1	1266	5	13824	8.73555
GOTERM_BP_DIRECT	GO:0090004~positive regulation of establishment of protein localization to plasma membrane	8	0.499376	0.00734349	PRKCI, ITGA3, KIF5B, AGR2, CIB1, EZR, EPHA2, PLS1	1266	26	13824	3.35983
GOTERM_BP_DIRECT	GO:0034976~response to endoplasmic reticulum stress	11	0.686642	0.00763649	ERO1A, PPP2CB, ERP44, CXCL8, BCL2L11, DDIT3, HYOU1, ANKS4B, TRIB3, PDIA4, ATF4	1266	46	13824	2.61117
GOTERM_BP_DIRECT	GO:0060326~cell chemotaxis	11	0.686642	0.0089247	DOCK4, M-SAA3.2, CCL20, SAA3, HMGB2, SAA2, PRKCQ, GRO1, CXCL3, CXCL5, EPHA2	1266	47	13824	2.55561
GOTERM_BP_DIRECT	GO:0007015~actin filament organization	11	0.686642	0.0089247	PRKCI, TMSB4X, LMOD1, RAC2, NCK2, FAT1, ARHGEF2, TMSB10, AKAP2, RND1, TMSB4	1266	47	13824	2.55561
GOTERM_BP_DIRECT	GO:0000086~G2/M transition of mitotic cell cycle	8	0.499376	0.00914661	CDKN1A, PLK1, CHEK1, USH1C, BIRC5, CALM1, ARPP19, NES	1266	27	13824	3.23539
GOTERM_BP_DIRECT	GO:0046777~protein autophosphorylation	20	1.24844	0.00969608	EPHA4, HIPK4, FLT1, CAMK2A, LMTK2, VRK1, NLK, MAPK15, EEF2K, SLK, MELK, MAPKAPK3, KDR, PIM1, MAPKAPK5, TNIK, PIM2, MAP3K13, EPHB3, DDR2	1266	117	13824	1.86657
GOTERM_BP_DIRECT	GO:0045766~positive regulation of angiogenesis	16	0.998752	0.00969685	RAMP2, FLT1, BTG1, CXCL8, ANXA3, CHRNA7, SERPINE1, VEGFC, CX3CL1, VEGFA, AQP1, RRAS, KDR, PTK2B, ANGPTL4, RAPGEF3	1266	85	13824	2.05542
GOTERM_BP_DIRECT	GO:0060325~face morphogenesis	8	0.499376	0.0112535	CSRNP1, SGPL1, RRAS, CRISPLD2, TIPARP, PAX9, MSX1, STRA6	1266	28	13824	3.11984
GOTERM_BP_DIRECT	GO:0090307~mitotic spindle assembly	8	0.499376	0.0112535	ARHGEF10, TPX2, KIF2A, TUBGCP6, BIRC5, MYBL2, KIF11, RAB11A	1266	28	13824	3.11984
GOTERM_BP_DIRECT	GO:0051443~positive regulation of ubiquitin-protein transferase activity	6	0.374532	0.0117937	DCUN1D5, FBXW7, DCUN1D3, PLK1, DCUN1D1, TRIB3	1266	16	13824	4.09479
GOTERM_BP_DIRECT	GO:0046627~negative regulation of insulin receptor signaling pathway	7	0.436954	0.0120211	SOCS3, SOCS1, CISH, GPR21, GRB10, TSC1, PRKCQ	1266	22	13824	3.47436
GOTERM_BP_DIRECT	GO:0033173~calcineurin-NFAT signaling cascade	4	0.249688	0.0123738	PPP3CA, PPP3R1, NFATC1, NFATC4	1266	6	13824	7.27962
GOTERM_BP_DIRECT	GO:0034141~positive regulation of toll-like receptor 3 signaling pathway	4	0.249688	0.0123738	CAV1, WDFY1, PELI1, F2RL1	1266	6	13824	7.27962
GOTERM_BP_DIRECT	GO:0046323~glucose import	5	0.31211	0.0136276	SORT1, SLC2A13, SESN2, SLC2A1, TSC1	1266	11	13824	4.96338
GOTERM_BP_DIRECT	GO:0045944~positive regulation of transcription from RNA polymerase II promoter	70	4.36954	0.0137193	RB1, CD40, CSF3, EHF, SMARCB1, CITED1, CITED4, HMGB2, RORA, GLI1, ETS1, CYR61, PPP3CA, HHEX, NCK2, SOX4, OSR2, H2AFZ, LMO4, NCOA3, CKAP2, FLT3LG, ETV1, FOS, ETV4, KLF15, ZEB1, HAX1, IL23A, ITGA6, IRF5, ARHGEF2, MET, RHOQ, ATF4, KMT2A, TNKS, CEBPG, MOSPD1, TWIST1, ADRB2, GATA3, E2F1, AAMDC, STAT5B, JUN, JUND, CNBP, ATAD2, HMGA2, NFATC1, NFATC4, NFKB2, FOSL2, VEGFA, NFKBIA, NR4A2, NR4A1, PER1, BMP2…	1266	580	13824	1.31786
GOTERM_BP_DIRECT	GO:0033138~positive regulation of peptidyl-serine phosphorylation	12	0.749064	0.0148804	PPP1R15A, BAG4, CSF3, PINK1, IL6, HAX1, RIPK2, CAV1, SPRY2, CD44, RAPGEF3, VEGFA	1266	58	13824	2.25919
GOTERM_BP_DIRECT	GO:0031623~receptor internalization	8	0.499376	0.0164831	ACHE, RAMP2, CXCL8, NEDD4, CAV1, ACKR3, EZR, LDLRAP1	1266	30	13824	2.91185
GOTERM_BP_DIRECT	GO:0043086~negative regulation of catalytic activity	7	0.436954	0.01853	PPP1R14A, PPP1R2, ANXA3, IL7, TIMP3, ARPP19, NES	1266	24	13824	3.18483
GOTERM_BP_DIRECT	GO:0051592~response to calcium ion	7	0.436954	0.01853	PPP3CA, S100A16, CAV1, KCNMA1, ADAM9, ITPR3, MNAT1	1266	24	13824	3.18483
GOTERM_BP_DIRECT	GO:0007346~regulation of mitotic cell cycle	7	0.436954	0.01853	CYLD, CKS2, PIM1, BIRC5, PIM2, CKS1B, THAP1	1266	24	13824	3.18483
GOTERM_BP_DIRECT	GO:2000679~positive regulation of transcription regulatory region DNA binding	5	0.31211	0.0189846	RB1, TWIST1, HMGA2, GATA3, KLF4	1266	12	13824	4.54976
GOTERM_BP_DIRECT	GO:0030193~regulation of blood coagulation	5	0.31211	0.0189846	LBH, CAV1, F2RL1, TC2N, STX2	1266	12	13824	4.54976
GOTERM_BP_DIRECT	GO:2000249~regulation of actin cytoskeleton reorganization	5	0.31211	0.0189846	GMFG, ARHGDIB, PTK2B, RHOD, RAPGEF3	1266	12	13824	4.54976
GOTERM_BP_DIRECT	GO:0098792~xenophagy	15	0.93633	0.0196444	SERPINB10, REP15, FANCL, SLC35C1, DKKL1, GMIP, NUP93, CHAF1B, FXR2, SNRPD1, PEX3, FAM131B, ACKR3, TNIK, ASB2	1266	84	13824	1.9499
GOTERM_BP_DIRECT	GO:0030308~negative regulation of cell growth	15	0.93633	0.0196444	CDKN2D, CDA, CDKN1A, SERPINE2, DCUN1D3, FHL1, OSGIN1, OSGIN2, BCL6, NOV, SERTAD2, GNG4, SESN2, MSX1, CRLF3	1266	84	13824	1.9499
GOTERM_BP_DIRECT	GO:0070863~positive regulation of protein exit from endoplasmic reticulum	4	0.249688	0.0201931	SEC16B, TMEM30A, SLC51B, SORL1	1266	7	13824	6.23968
GOTERM_BP_DIRECT	GO:2000144~positive regulation of DNA-templated transcription, initiation	4	0.249688	0.0201931	FOSL1, JUN, TWIST1, MITF	1266	7	13824	6.23968
GOTERM_BP_DIRECT	GO:0006002~fructose 6-phosphate metabolic process	4	0.249688	0.0201931	GFPT1, PFKM, FBP2, PFKP	1266	7	13824	6.23968
GOTERM_BP_DIRECT	GO:0051310~metaphase plate congression	4	0.249688	0.0201931	CENPF, KIF22, FAM83D, GEM	1266	7	13824	6.23968
GOTERM_BP_DIRECT	GO:0006887~exocytosis	10	0.62422	0.0217678	RPH3AL, EXOC3L4, SCRN1, CCL5, TNFAIP2, LIN7A, SCAMP1, VAMP4, RAB11A, SEC22C	1266	46	13824	2.37379
GOTERM_BP_DIRECT	GO:0006954~inflammatory response	30	1.87266	0.021921	PTGER4, CD40, CXCL8, CALCB, TUSC2, TNFRSF11B, CXCL3, GRO1, AGER, CXCL5, CX3CL1, CCL5, OLR1, JAK2, CCL17, RELT, MAP2K3, GGT5, CCL20, IL18, LOC510798, TICAM1, TNFRSF1B, TNFRSF10D, NFKB2, BMP2, LOC100139916, F2RL1, FAS, EPHA2	1266	215	13824	1.52364
GOTERM_BP_DIRECT	GO:0051881~regulation of mitochondrial membrane potential	7	0.436954	0.0225445	PINK1, TUSC2, UCP2, PYCR1, CLIC1, SLC25A33, SLC25A36	1266	25	13824	3.05744
GOTERM_BP_DIRECT	GO:0045931~positive regulation of mitotic cell cycle	7	0.436954	0.0225445	FOXA1, STAT5B, CCNB1, EIF4EBP1, ASNS, BIRC5, PKN2	1266	25	13824	3.05744
GOTERM_BP_DIRECT	GO:0030216~keratinocyte differentiation	9	0.561798	0.0228008	SCEL, CLIC4, MAP2K1, CASP3, ADAM9, RBPJ, TGM3, EPHA2, SAV1	1266	39	13824	2.51987
GOTERM_BP_DIRECT	GO:0042518~negative regulation of tyrosine phosphorylation of Stat3 protein	3	0.187266	0.0235736	SOCS3, SOCS1, NF2	1266	3	13824	10.9194
GOTERM_BP_DIRECT	GO:0006469~negative regulation of protein kinase activity	13	0.811486	0.0240668	RB1, CISH, GADD45A, DNAJC3, SOCS3, SOCS1, CAMK2N1, GNAQ, CHP1, TRIB3, NF2, SOCS7, SOCS5	1266	70	13824	2.02789
GOTERM_BP_DIRECT	GO:0001837~epithelial to mesenchymal transition	6	0.374532	0.0249538	BMP2, PPP3R1, LOXL3, HMGA2, FAM83D, LOXL2	1266	19	13824	3.44824
GOTERM_BP_DIRECT	GO:0003333~amino acid transmembrane transport	5	0.31211	0.0254752	SLC6A6, SLC6A9, PEX3, SLC38A2, SLC36A4	1266	13	13824	4.19978
GOTERM_BP_DIRECT	GO:0006366~transcription from RNA polymerase II promoter	20	1.24844	0.0255316	OSR2, EHF, LMO4, BCL11A, CEBPG, NFXL1, ETV1, HSF2BP, GATA3, FOS, RBPJ, OVOL1, GTF2H3, NR4A2, NR4A1, CREB3L3, NFIL3, MAFG, MAFF, MNAT1	1266	129	13824	1.69294
GOTERM_BP_DIRECT	GO:0030036~actin cytoskeleton organization	14	0.873908	0.0264176	TNXB, ARHGAP26, CORO2A, CORO1C, TMSB4, FMNL3, DIAPH3, BCL6, CORO6, ABL2, KRAS, NF2, TMSB10, PDLIM7	1266	79	13824	1.93509
GOTERM_BP_DIRECT	GO:0030198~extracellular matrix organization	13	0.811486	0.0266365	ERO1A, TNXB, OLFML2B, TNFRSF11B, FBLN1, KAZALD1, MMP9, CYR61, NFKB2, ADAMTSL4, CRISPLD2, NPHP3, TGFBI	1266	71	13824	1.99933
GOTERM_BP_DIRECT	GO:0045727~positive regulation of translation	7	0.436954	0.0271048	PINK1, IL6, SERP1, EIF6, SAMD4A, SOX4, RBMS3	1266	26	13824	2.93985
GOTERM_BP_DIRECT	GO:0050873~brown fat cell differentiation	7	0.436954	0.0271048	ERO1A, RGS2, MB, BNIP3, ITGA6, ADRB2, SLC2A4	1266	26	13824	2.93985
GOTERM_BP_DIRECT	GO:0019915~lipid storage	7	0.436954	0.0271048	STAT5B, CAV1, CIDEA, FITM1, PLIN2, ABHD5	1266	26	13824	2.93985
GOTERM_BP_DIRECT	GO:0030154~cell differentiation	31	1.93508	0.0271525	CALR3, EHF, SMARCB1, DAPL1, ECSCR, USH1C, SPATA6, ETS1, ELK3, CSRP2, PLAGL1, AGR2, PTK2B, ABL2, MYBL2, STX2, PDLIM7, ODF2, ETV1, TRAPPC9, TYK2, FOXN2, ETV4, ETV5, VEGFA, GADD45G, TEC, KIF2A, C15H11ORF34, ANGPTL4, FRK	1266	228	13824	1.48466
GOTERM_BP_DIRECT	GO:0002230~positive regulation of defense response to virus by host	16	0.998752	0.0275911	SERPINB10, REP15, FANCL, SLC35C1, DKKL1, GMIP, NUP93, CHAF1B, FXR2, IL23A, SNRPD1, PEX3, FAM131B, ACKR3, TNIK, ASB2	1266	96	13824	1.81991
GOTERM_BP_DIRECT	GO:0001570~vasculogenesis	10	0.62422	0.0281411	RAMP2, SGPL1, HHEX, CITED1, TIPARP, CAV1, ACKR3, RASIP1, EPHA2, ZFP36L1	1266	48	13824	2.27488
GOTERM_BP_DIRECT	GO:0031175~neuron projection development	13	0.811486	0.0294003	RB1, BTG2, NLGN1, AGER, RAB11A, EHD1, IL6, GDNF, MAP2, NEDD4, RAB13, MICALL1, STMN1	1266	72	13824	1.97156
GOTERM_BP_DIRECT	GO:0051292~nuclear pore complex assembly	4	0.249688	0.0301403	NUP93, NUP205, AHCTF1, RTN4	1266	8	13824	5.45972
GOTERM_BP_DIRECT	GO:0033209~tumor necrosis factor-mediated signaling pathway	6	0.374532	0.030834	CD40, PTK2B, FAS, TNFRSF11B, JAK2, CARD14	1266	20	13824	3.27583
GOTERM_BP_DIRECT	GO:0016567~protein ubiquitination	24	1.49813	0.0308816	BARD1, HACE1, CISH, FBXW7, PLK1, KLHL21, ASB13, UBE2L6, KLHL35, FBXO32, CCNB1IP1, MARCH3, SOCS3, DCAF16, PINK1, SOCS1, RNF138, ENC1, MDM2, BIRC5, ARIH1, ASB2, SOCS7, SOCS5	1266	167	13824	1.56926
GOTERM_BP_DIRECT	GO:0045599~negative regulation of fat cell differentiation	8	0.499376	0.0316702	MMP11, SORT1, DDIT3, E2F1, RORA, TRIB3, GATA3, JDP2	1266	34	13824	2.56928
GOTERM_BP_DIRECT	GO:0000122~negative regulation of transcription from RNA polymerase II promoter	51	3.18352	0.0319975	FOXA1, RB1, FHL2, RBPJ, ZFP36, CCND1, WWC3, CIC, HIST1H1C, PRMT6, TLE4, OSR2, RBM15, FST, MITF, OVOL1, DDIT3, EZR, DLX1, UHRF1, MOSPD1, TWIST1, GATA3, NFIL3, DNAJB5, E2F1, SUDS3, CRYM, HOXC8, ZBTB18, PLK3, JUN, JUND, BCL11A, CAV1, PLK1, HMGA2, DNAJC17, NFKB2, NR4A2, PER1, BMP2, NR6A1, BCL6, NFIA, PKIA, BHLHE40, MDM2, PKIG, RCOR2, FRK	1266	420	13824	1.32593
GOTERM_BP_DIRECT	GO:0007229~integrin-mediated signaling pathway	12	0.749064	0.0326664	TYROBP, TEC, ITGA3, ITGA2B, ZYX, ILK, PTK2B, ITGA7, ITGAV, ITGA6, ITGAE, CDH17	1266	65	13824	2.0159
GOTERM_BP_DIRECT	GO:0051276~chromosome organization	5	0.31211	0.0331426	PTTG1, NCAPH2, RAD54L, GEM	1266	14	13824	3.8998
GOTERM_BP_DIRECT	GO:0030182~neuron differentiation	10	0.62422	0.0357208	MAP2K1, CASP3, DDIT4, ACSL4, TRAPPC9, SMARCA1, HIPK1, HOXC8, RUNX1, EPHA2	1266	50	13824	2.18389
GOTERM_BP_DIRECT	GO:0032760~positive regulation of tumor necrosis factor production	8	0.499376	0.0365713	SPON2, IL23A, RIPK2, TWIST1, ZBTB20, ARHGEF2, TICAM1, NFATC4	1266	35	13824	2.49587
GOTERM_BP_DIRECT	GO:0032456~endocytic recycling	6	0.374532	0.0375133	EHD1, ARL4C, SNX4, EHD4, RAB13, LMTK2	1266	21	13824	3.11984
GOTERM_BP_DIRECT	GO:0006270~DNA replication initiation	6	0.374532	0.0375133	CDC45, CCNE2, MCM4, MCM5, CDC6, MCM6	1266	21	13824	3.11984
GOTERM_BP_DIRECT	GO:0018107~peptidyl-threonine phosphorylation	7	0.436954	0.0379581	TNKS, STK39, CDK1, LMTK2, OXSR1, NLK, HIPK3	1266	28	13824	2.72986
GOTERM_BP_DIRECT	GO:0000226~microtubule cytoskeleton organization	10	0.62422	0.0399905	TUBA1B, WEE1, MAP2, MAP1B, TACC3, TACC1, VAMP4, GAPDH, PHLDB2, MARK1	1266	51	13824	2.14106
GOTERM_BP_DIRECT	GO:0071260~cellular response to mechanical stimulus	8	0.499376	0.0419468	PTGER4, CD40, CASP8, GADD45A, BNIP3, CHEK1, FAS, AQP1	1266	36	13824	2.42654
GOTERM_BP_DIRECT	GO:0048146~positive regulation of fibroblast proliferation	8	0.499376	0.0419468	JUN, CCNB1, CDKN1A, E2F1, FOSL2, AQP1, DDR2, EREG	1266	36	13824	2.42654
GOTERM_BP_DIRECT	GO:0097190~apoptotic signaling pathway	8	0.499376	0.0419468	SGPL1, CD40, DAPL1, CAV1, TNFRSF11B, TNFRSF1B, TICAM1, RELT	1266	36	13824	2.42654
GOTERM_BP_DIRECT	GO:0046847~filopodium assembly	4	0.249688	0.0421917	TTYH1, ITGA6, S1PR2, EZR	1266	9	13824	4.85308
GOTERM_BP_DIRECT	GO:0071549~cellular response to dexamethasone stimulus	4	0.249688	0.0421917	DDIT4, EIF4EBP1, FBXO32, AQP1	1266	9	13824	4.85308
GOTERM_BP_DIRECT	GO:0060674~placenta blood vessel development	4	0.249688	0.0421917	FOSL1, SOCS3, MAP2K1, RBM15	1266	9	13824	4.85308
GOTERM_BP_DIRECT	GO:0009615~response to virus	9	0.561798	0.0439224	ACTA2, BATF3, RSAD2, NPC2, CCL5, STMN1, HMGA1, GATA3, PIM2	1266	44	13824	2.23352
GOTERM_BP_DIRECT	GO:0043154~negative regulation of cysteine-type endopeptidase activity involved in apoptotic process	9	0.561798	0.0439224	CDKN2D, NR4A1, TNFAIP8, SIAH2, MICAL1, BIRC5, KLF4, CD44, NAIP	1266	44	13824	2.23352
GOTERM_BP_DIRECT	GO:0070098~chemokine-mediated signaling pathway	9	0.561798	0.0439224	CXCL8, CCL20, CCL5, PTK2B, CXCR4, CXCL3, CCL17, CXCL5, CX3CL1	1266	44	13824	2.23352
GOTERM_BP_DIRECT	GO:0019882~antigen processing and presentation	7	0.436954	0.0442887	ULBP27, RAB10, RAB4A, AZGP1, LOC100850276, RAB33A, MIC1	1266	29	13824	2.63572
GOTERM_BP_DIRECT	GO:0002548~monocyte chemotaxis	7	0.436954	0.0442887	LGALS3, FLT1, CALCB, CCL20, CCL5, CCL17, CX3CL1	1266	29	13824	2.63572
GOTERM_BP_DIRECT	GO:0009913~epidermal cell differentiation	3	0.187266	0.0442983	SPINK5, GLI1, KLF4	1266	4	13824	8.18957
GOTERM_BP_DIRECT	GO:0072656~maintenance of protein location in mitochondrion	3	0.187266	0.0442983	PINK1, HK2, HK1	1266	4	13824	8.18957
GOTERM_BP_DIRECT	GO:1900180~regulation of protein localization to nucleus	3	0.187266	0.0442983	RASSF5, LMNA, NF2	1266	4	13824	8.18957
GOTERM_BP_DIRECT	GO:0006418~tRNA aminoacylation for protein translation	3	0.187266	0.0442983	MARS, DARS2, MRPL39	1266	4	13824	8.18957
GOTERM_BP_DIRECT	GO:0045746~negative regulation of Notch signaling pathway	6	0.374532	0.045011	NFKBIA, DLX1, HEY1, BCL6, SLC35C1, C27H8ORF4	1266	22	13824	2.97803
GOTERM_BP_DIRECT	GO:0030968~endoplasmic reticulum unfolded protein response	8	0.499376	0.0478088	ERO1A, PPP1R15A, SERP1, CREB3L3, CCND1, DDIT3, HERPUD1, AARS	1266	37	13824	2.36096
GOTERM_CC_DIRECT	GO:0005737~cytoplasm	369	23.0337	1.23286e-09	ERRFI1, RBPJ, PDCD2L, MT2A, RASSF1, FTH1, STMN1, FBXO5, SOX4, MFSD2A, HERC6, EPHA4, CXADR, SDS, PIH1D1, IFRD1, RFX2, ASRGL1, RUNX1, SULT2B1, INPP4A, MT1A, PPA1, PRKAR1A, DDIT3, DDIT4, PADI2, PRKCQ, HOXB2, NAIP, ATF4, NUP205, BEX2, SHMT2, DCUN1D3, CDCA7, NCAPG, NLK, ARPP19, SKA1, TTBK2, UBE2J1, SEC14L2, LDHB, DSN1, FXR2, RACGAP1, DHX33, PCBP4, MAP2, MICAL1, CEP70, STK38L, ASL, RIMKLA, SCAI, NXNL2,…	1393	3109	15461	1.31732
GOTERM_CC_DIRECT	GO:0005634~nucleus	332	20.7241	2.1944e-07	RB1, EHF, RBPJ, AQP1, ELK3, PSMD8, LGALS3, MT2A, RASSF1, CREB3L3, RASSF5, RAVER2, FBXO5, SOX4, IER3, HERC6, PRKCI, CXADR, IFRD1, METTL3, RFX2, OVOL1, ASRGL1, RUNX1, THAP1, AZGP1, MT1A, DDIT3, RRAGD, SRFBP1, HOXB2, TRIB3, ATF4, BEX2, CDCA2, RPN2, SHMT2, CDCA7, TWIST1, GATA3, NLK, TTBK2, SEC14L2, FXR2, SCAI, STAT5B, CDT1, HACE1, TEX30, BCL11A, GADD45A, TIPARP, SS18L1, SIAH2, NCAPH2, PLK1, CIDEA, PB…	1393	2873	15461	1.28259
GOTERM_CC_DIRECT	GO:0000922~spindle pole	22	1.37328	1.72789e-06	ODF2, CKAP2L, MTCL1, CEP19, PLK1, CDC6, KIF11, RAB11A, AURKA, SGO1, PPP2CB, TPX2, DSN1, CENPF, CCNB1, KIF2A, TUBGCP6, POC1B, KNTC1, AUNIP, SPDL1, CALM1	1393	75	15461	3.25573
GOTERM_CC_DIRECT	GO:0070062~extracellular exosome	248	15.4806	2.18933e-05	CYFIP2, CPNE8, SPON2, IL1RN, SERPINE1, GHITM, ENO2, ACTB, AQP1, PSMD8, LGALS3, ALCAM, LGALS1, RUSC2, STMN1, ARL6IP5, PRKCI, ENTPD5, SERPINF1, SYTL1, HPCAL1, ACSL4, SULT2B1, AZGP1, CARHSP1, PPA1, CRISPLD2, PADI2, EZR, NAIP, PLA1A, SHMT2, ENDOD1, LDHB, FXR2, RACGAP1, RRAS, S100A16, NCKAP1L, ATP6V0A4, PCK2, TRAP1, CADM1, GNG12, CS, EHD4, FXYD3, GPR180, FASN, FAT1, HYOU1, CALM1, AARS, CLIC4, CD40, BT…	1393	2162	15461	1.27316
GOTERM_CC_DIRECT	GO:0005925~focal adhesion	52	3.24594	3.42714e-05	SCARB2, FLT1, FHL1, ITGA2B, FHL2, ILK, RND3, ACTB, ACTG1, ALCAM, CSRP2, ADGRE5, PLAU, CAPN5, RAC2, CHP1, ITGAV, YWHAG, TPM4, ITGA3, PLAUR, RRAS2, KIF22, PROCR, ADAM9, ITGA6, LCP1, ARHGEF2, EZR, PHLDB2, CD44, EPHA2, DDR2, RALA, STX16, HSP90B1, CORO1C, PDLIM1, RRAS, PTK2B, FLNC, PDLIM7, HSPA9, CAV1, LIMK1, HMGA1, RAB10, DLC1, FAT1, ZYX, HYOU1, KRAS	1393	318	15461	1.81494
GOTERM_CC_DIRECT	GO:0005829~cytosol	122	7.61548	0.00102122	CDA, SERPINE2, IRS1, DIXDC1, HSF2BP, SAT1, ACTB, PSMD8, ZFP36, RGS2, MT2A, CCND2, PPIP5K1, SNRPD1, ARHGDIB, WWC3, PRKCI, TLE1, SPINK5, LMTK2, CARHSP1, MTHFD2, MAP1B, RBP1, DDIT4, WDFY1, EZR, UBA7, TNKS, ECSCR, ARL1, GMPS, RHOBTB3, ABHD5, NDRG1, HSP90B1, TTBK2, ZFP36L1, BAG4, PPP3R1, NDOR1, BAG5, S100A16, EIF4EBP1, ASL, NCKAP1L, RAB6A, EVI5, BCL2L14, BCL2L15, OSBPL6, SIAH2, HSPA6, ASNS, CIDEB, PAF…	1393	1025	15461	1.32106
GOTERM_CC_DIRECT	GO:0042383~sarcolemma	14	0.873908	0.00115503	SYNM, CAV1, CIB1, SLC2A4, SLC8A1, AQP1, SGCE, CACNB1, PPP3CA, PPP3R1, COL6A2, COL6A1, COL6A3, FLNC	1393	56	15461	2.77477
GOTERM_CC_DIRECT	GO:0005813~centrosome	46	2.87141	0.00186199	DCTN6, CEP57, CLIC4, NCAPG, CHD4, SLC1A4, CIB1, NDRG1, HSPB11, CCDC28B, GNAI1, AURKA, CCNB1, CDC45, CHEK1, CEP70, PDE4B, MVB12A, SNAP29, CEP55, CEP78, ARHGEF10, PLK3, CKAP2L, PLK1, KLHL21, CKAP2, VPS37A, HAUS6, ELL2, SYTL4, RAB11A, SGO1, PROCR, CYLD, CENPF, RGCC, KIF2A, ESPL1, POC5, DDAH2, CDK1, TUBGCP6, PKN2, AUNIP, CALM1	1393	321	15461	1.59052
GOTERM_CC_DIRECT	GO:0005783~endoplasmic reticulum	65	4.05743	0.00216307	CALR3, GOLT1B, PIGZ, CIB1, ZDHHC2, EEF1B2, SERP1, KDR, NCK2, CHP1, MAN1A1, SMIM14, MAP2K1, PLA2G12A, RSAD2, ENTPD5, PLA2G4A, SLC30A1, FOS, CPT1C, ZDHHC14, PDIA4, DNAJC3, NT5C3A, TRAPPC6A, PEX3, NPC2, TRAPPC6B, KCNMA1, CRELD2, MCTP2, PPP1R15A, NECAB3, ATL3, SLC35D1, TOR1AIP2, PTN, LTC4S, HSPA13, HSP90B1, SGPL1, SV2A, CREG2, AGR2, BNIP1, DNAJB9, B3GALNT2, TRAPPC2, CRTAP, TMEM30A, HACE1, BNIP3, CAV1…	1393	497	15461	1.45159
GOTERM_CC_DIRECT	GO:0005876~spindle microtubule	10	0.62422	0.00310021	KIF2A, SPAG5, PLK1, CDK1, NUSAP1, BIRC5, KIF11, CALM1, SKA1, AURKA	1393	35	15461	3.17116
GOTERM_CC_DIRECT	GO:0055038~recycling endosome membrane	9	0.561798	0.00325236	EHD1, EHD4, RAP2B, RAB13, MICALL1, SCAMP1, NDRG1, ZDHHC2, RAB11A	1393	29	15461	3.44454
GOTERM_CC_DIRECT	GO:0005811~lipid particle	12	0.749064	0.00358486	EHD1, RSAD2, AIFM2, LPCAT2, CIDEA, CIDEB, PLIN3, PLIN2, ACSL4, ABHD5, GAPDH	1393	49	15461	2.71814
GOTERM_CC_DIRECT	GO:0048471~perinuclear region of cytoplasm	50	3.1211	0.00371426	CYFIP2, EIF4A2, ACHE, CLIC4, HMGB2, BUB1B, CIB1, SLC2A4, MT2A, STBD1, CA4, CLIC1, KCNH2, SPINK5, LMTK2, MT1A, SRFBP1, S100A4, EZR, REP15, STX16, DCUN1D3, MOSPD1, NDRG1, HSP90B1, AURKA, CTIF, NDOR1, BAG5, DNAJB6, HECTD3, NOCT, PTK2B, TPPP, RHPN2, TRAPPC2, ABCA1, RAB4A, SORT1, CAV1, CIDEB, RAB11A, EHD1, CYLD, PINK1, EHD4, NEDD4, FAT1, PKN2, NF2	1393	369	15461	1.50394
GOTERM_CC_DIRECT	GO:0005622~intracellular	77	4.80649	0.00892219	FAM49A, DGKD, CXCL8, MAST3, POGK, GMFG, RND2, SAT1, RND3, ARL5B, FSD1L, LGALS1, ITGAV, MAP3K7, YWHAG, RALGPS2, KCNH2, MYLIP, RAB2B, ZNF484, PRKCI, WSB1, CISH, IL18, TBC1D9, RRAS2, TBC1D2B, OXSR1, GMIP, GTPBP2, TNFRSF1B, RHOD, RAB33A, PARP8, TBC1D1, DDX19B, DEPDC1B, MRAS, RNF125, PRKCQ, RHOV, ARHGEF2, RAPGEF3, EPHA2, RALA, TNXB, TRIM52, RRAD, TUFT1, ASB13, STK39, GOLGA7B, SEC14L2, RASD1, RRAS, ERB…	1393	646	15461	1.32295
GOTERM_CC_DIRECT	GO:0031234~extrinsic component of cytoplasmic side of plasma membrane	12	0.749064	0.00895729	ERRFI1, CYLD, SNX18, TEC, RACGAP1, ABL2, PTK2B, KRAS, TYK2, JAK2, FRK, TGM3	1393	55	15461	2.42161
GOTERM_CC_DIRECT	GO:0032593~insulin-responsive compartment	4	0.249688	0.0118285	RAB10, RAB4A, RAB13, SLC2A4	1393	6	15461	7.39938
GOTERM_CC_DIRECT	GO:0000307~cyclin-dependent protein kinase holoenzyme complex	6	0.374532	0.014493	CDKN1A, CCND2, CCND1, CDK2, CKS2, CKS1B	1393	17	15461	3.91732
GOTERM_CC_DIRECT	GO:0005874~microtubule	23	1.43571	0.0188291	CEP57, ODF2, TUBB, CKAP2, TUBE1, KIF22, NDRG1, TPX2, TPPP3, KIF2A, MAP2, REEP4, KIF5B, MAP1B, STMN1, TEKT2, SPRY2, KIF3C, KIF20A, TPPP, ARHGEF2, CCDC50, SYBU	1393	153	15461	1.66849
GOTERM_CC_DIRECT	GO:0042470~melanosome	13	0.811486	0.0238429	HSPA5, SERPINF1, SLC2A1, ATP1B3, CAPG, SLC1A4, SLC1A5, PDIA4, HSP90B1, FASN, DNAJC5, CALU, STX3	1393	71	15461	2.03222
GOTERM_CC_DIRECT	GO:0030175~filopodium	9	0.561798	0.0276858	ACTA2, CXADR, ABI1, FAT1, LCP1, NF2, EZR, DNALI1, RAPGEF3	1393	41	15461	2.43638
GOTERM_CC_DIRECT	GO:0005802~trans-Golgi network	17	1.06117	0.032091	STX16, ARL1, OCRL, WIPI1, TRAPPC9, SCAMP1, SORL1, RAB11A, PLEKHA8, TRAPPC6A, TRAPPC6B, CA4, KIAA1324, RAB13, NCK2, TGFBI, RAB7B	1393	108	15461	1.74708
GOTERM_CC_DIRECT	GO:0016324~apical plasma membrane	23	1.43571	0.0357299	PRKCI, TMEM30A, SLC1A1, STK39, SLC2A1, CIB1, ADRB2, PLD1, CLDN1, AQP1, ANO1, C15H11ORF34, ERBB3, CA4, KCNMA1, MAL2, ATP6V0A4, TNIK, STX3, EZR, SLC29A1, KCNK1, PFKM	1393	163	15461	1.56613
GOTERM_CC_DIRECT	GO:0030496~midbody	16	0.998752	0.0364321	CLIC4, MTCL1, PLK1, SLC2A1, GEM, GNAI1, HSP90B1, CYLD, CENPF, RACGAP1, PRC1, CDK1, BIRC5, PKN2, KIF20A, CEP55	1393	101	15461	1.75827
GOTERM_CC_DIRECT	GO:0005654~nucleoplasm	137	8.55181	0.0389099	EHF, SMARCB1, ZBTB20, CIB1, ETS1, LOXL2, ELK3, PNN, RGS3, CCND2, PPIP5K1, CCND1, CHEK1, FBXO5, SOX4, SYBU, SCAF11, IPMK, ARID5A, VRK1, SCAMP1, SYTL4, RUNX1, SGO1, MAPKAPK3, AKIP1, PKP2, MAPKAPK5, TNIK, DAP3, RAI14, ASF1B, NUP205, PFKFB3, CDCA7, ITPR3, AK6, AK9, DHX33, RACGAP1, CEP70, EIF4EBP1, RHPN2, HOXC8, GRIA3, HOXC6, BARD1, TRAP1, PHC2, JUN, GADD45A, SIAH2, CDC6, FBXO32, NFKB2, FOSL2, NR4A2, …	1393	1310	15461	1.16074
GOTERM_CC_DIRECT	GO:0051233~spindle midzone	5	0.31211	0.0399073	RACGAP1, PLK1, CDC6, GEM, AURKA	1393	15	15461	3.69969
GOTERM_CC_DIRECT	GO:0031616~spindle pole centrosome	4	0.249688	0.0404684	TBCCD1, BNIP2, DLGAP5, AURKA	1393	9	15461	4.93292
GOTERM_CC_DIRECT	GO:0045120~pronucleus	4	0.249688	0.0404684	CENPF, HNRNPC, AURKA, EZH2	1393	9	15461	4.93292
GOTERM_CC_DIRECT	GO:0030027~lamellipodium	17	1.06117	0.0429408	SWAP70, ILK, TSC1, CIB1, CORO1C, ACTA2, HAX1, ABI1, RAB13, RAC2, FAT1, PTK2B, PKN2, NF2, STX3, STX2, RAPGEF3	1393	112	15461	1.68468
GOTERM_CC_DIRECT	GO:0031262~Ndc80 complex	3	0.187266	0.0429732	NUF2, SPC24, NDC80	1393	4	15461	8.3243
GOTERM_CC_DIRECT	GO:0000942~condensed nuclear chromosome outer kinetochore	3	0.187266	0.0429732	CCNB1, PLK1, NDC80	1393	4	15461	8.3243
GOTERM_CC_DIRECT	GO:0045177~apical part of cell	10	0.62422	0.0454641	SLC4A9, CLIC4, PARD6B, PLAUR, USH1C, PLAT, NF2, EZR, LDLR, AQP1	1393	53	15461	2.09416
GOTERM_MF_DIRECT	GO:0008017~microtubule binding	20	1.24844	9.85397e-06	CEP57, MTCL1, MAST2, CETN2, PLK1, KIF22, SKA1, BCL2L11, KIF2A, MAP2, REEP4, NUSAP1, BIRC5, CHP1, KIF3C, KIF20A, TPPP, EZR, FAM83D, GAPDH	1172	71	13095	3.14738
GOTERM_MF_DIRECT	GO:0005524~ATP binding	146	9.11361	0.000186312	EIF4A2, DGKD, TRIO, BUB1B, UBE2L6, TTF2, MYLK3, ACTB, ACTG1, SLK, PPIP5K1, KIF5B, CHEK1, PIM1, KDR, PIM2, MAP3K7, EPHB3, MAP2K3, EPHA4, PRKCI, CDKL4, MAP2K1, SWAP70, CSNK2A2, LMTK2, SARS, VRK1, RUNX1, MELK, MAPKAPK3, CMPK1, PRKCQ, MAPKAPK5, TRIB3, TNIK, KIF20A, KIF20B, NAIP, EPHA2, PFKFB3, ABCB1, NPR2, AK1, STK39, GMPS, RHOBTB3, NLK, AK6, HSP90B1, TTBK2, AK9, DHX33, ABL2, STK38L, KIF3C, RIMKLA, M…	1172	1224	13095	1.33275
GOTERM_MF_DIRECT	GO:0019901~protein kinase binding	19	1.18602	0.000196518	CDKN2D, TRAP1, CAV1, PLK1, AURKA, CKS1B, CCNA2, DNAJC3, CYLD, GYS1, CCNB1, BAG5, CCND2, CCND1, RNF138, SV2A, CKS2, SPRY2, KIF20A	1172	80	13095	2.65364
GOTERM_MF_DIRECT	GO:0005525~GTP binding	52	3.24594	0.000234726	RND2, RND3, RND1, GMPPB, TUBA1B, ARL5B, RAC2, RAB2B, TUBB, RRAS2, SEPT4, GTPBP2, RHOD, SEPT5, RAB33A, GEM, ARL4C, MRAS, RAP2B, RP2, RRAGD, RHOV, RAB7B, RHOQ, RALA, ATL3, RRAD, NPR2, ARL1, RHOBTB3, GNAI1, RASD1, RRAS, RAB6A, PCK2, EEFSEC, SEPT10, RAB4A, GCH1, EFL1, RAB39A, TUBE1, RAB11A, RAB10, EHD1, EHD4, GNAQ, RAB13, RAB9A, NMUR2, KRAS, RHEBL1	1172	345	13095	1.68408
GOTERM_MF_DIRECT	GO:0000982~transcription factor activity, RNA polymerase II core promoter proximal region sequence-specific binding	9	0.561798	0.000281304	FOSL1, BATF3, JUN, FOSB, MSX1, FOS, ETS1, JDP2, FOSL2	1172	21	13095	4.78852
GOTERM_MF_DIRECT	GO:0042056~chemoattractant activity	8	0.499376	0.00305891	LGALS3, M-SAA3.2, CCL5, SAA3, HMGB2, SAA2, VEGFC, VEGFA	1172	23	13095	3.88633
GOTERM_MF_DIRECT	GO:0008083~growth factor activity	15	0.93633	0.00418643	CSF3, CSF2, MIA, GMFG, OSGIN1, VEGFC, OSGIN2, PTN, NGF, GRO1, AREG, VEGFA, EREG, IL6, IL7	1172	72	13095	2.32775
GOTERM_MF_DIRECT	GO:0005031~tumor necrosis factor-activated receptor activity	7	0.436954	0.0049429	CD40, FAS, TNFRSF11B, LOC510798, TNFRSF1B, RELT, TNFRSF10D	1172	19	13095	4.11645
GOTERM_MF_DIRECT	GO:0031624~ubiquitin conjugating enzyme binding	7	0.436954	0.0107816	RNF125, DCUN1D5, RNF138, DCUN1D3, DCUN1D1, RNF19B, ARIH1	1172	22	13095	3.55511
GOTERM_MF_DIRECT	GO:0001228~transcriptional activator activity, RNA polymerase II transcription regulatory region sequence-specific binding	14	0.873908	0.0165337	FOXA1, CSRNP1, OSR2, CSRNP2, ARID3B, GATA3, ETV5, RUNX1, CREB3L3, MAFG, PLAGL1, PAX9, MAFF, MSX1	1172	76	13095	2.05822
GOTERM_MF_DIRECT	GO:0004867~serine-type endopeptidase inhibitor activity	15	0.93633	0.0180308	SERPINA11, SERPINB10, SERPINB2, SERPINE2, SERPINF1, SPINK5, SERPINE1, CRIM1, SERPINA6, TFPI, SERPINB8, WFDC2, SERPINA5, COL6A3	1172	85	13095	1.97174
GOTERM_MF_DIRECT	GO:0017137~Rab GTPase binding	12	0.749064	0.0204078	TBC1D1, RPH3AL, HACE1, MICAL1, MICALL1, SGSM2, TBC1D9, TBC1D2B, RABGGTB, EVI5, RBSN, TBC1D15	1172	62	13095	2.16256
GOTERM_MF_DIRECT	GO:0005096~GTPase activator activity	26	1.62297	0.0214644	DOCK4, RGS16, ARHGAP18, RASAL2, RGS2, RGS3, RACGAP1, ARHGDIB, NCKAP1L, EVI5, TBC1D15, JUN, TBC1D9, OCRL, TBC1D2B, ARHGAP26, GMIP, TBC1D1, RP2, CDC42EP5, GNAQ, DLC1, SGSM2, RASA2, RGS11	1172	183	13095	1.58745
GOTERM_MF_DIRECT	GO:0050145~nucleoside phosphate kinase activity	3	0.187266	0.0225442	DTYMK, CMPK1, AK9	1172	3	13095	11.1732
GOTERM_MF_DIRECT	GO:0004715~non-membrane spanning protein tyrosine kinase activity	9	0.561798	0.0232321	WEE1, TEC, MELK, RIPK2, ABL2, PTK2B, TYK2, JAK2, FRK	1172	40	13095	2.51397
GOTERM_MF_DIRECT	GO:0019900~kinase binding	5	0.31211	0.0235942	RB1, SIT1, CHP1, FAS, PFKM	1172	13	13095	4.29739
GOTERM_MF_DIRECT	GO:0004674~protein serine/threonine kinase activity	29	1.81024	0.0248487	GSK3B, TRIO, MAST3, MAST2, STK39, ILK, TTBK2, EEF2K, PIM1, STK38L, PIM2, MARK1, PLK3, PRKCI, CDKL4, RIPK2, PLK2, CSNK2A2, PLK1, LMTK2, VRK1, HIPK3, PINK1, WEE1, MELK, MAPKAPK3, PKN2, SGK3, PRKCQ	1172	213	13095	1.52123
GOTERM_MF_DIRECT	GO:0000978~RNA polymerase II core promoter proximal region sequence-specific DNA binding	35	2.18477	0.0299363	EHF, SMARCB1, MAX, CEBPG, BHLHE41, CHD4, GLI1, RBPJ, ACTB, ELK3, HHEX, MYBL2, BATF3, JUN, JUND, H2AFZ, RFX2, ETV1, MITF, ARID3B, FOS, OVOL1, ETV4, FOSL2, NFATC4, NFKB2, FOSL1, PER1, NR6A1, KLF5, NFIA, DDIT3, FOSB, JDP2, ATF4	1172	273	13095	1.43246
GOTERM_MF_DIRECT	GO:0042802~identical protein binding	20	1.24844	0.0315007	UHRF1, FBXW7, TUFT1, NPR2, HSPB8, CAV1, SLC2A1, FHL2, CIDEB, PYCR1, CLDN1, ACTG1, THAP1, CHAF1A, MICALL1, BNIP2, FAS, S100A4, TK1, ANGPTL4	1172	135	13095	1.65529
GOTERM_MF_DIRECT	GO:0008134~transcription factor binding	13	0.811486	0.0334107	RB1, JUN, JUND, LMO4, CEBPG, HMGA1, HMGB2, FHL2, FOS, RBPJ, CCND1, PIM1, RCOR2	1172	75	13095	1.93669
GOTERM_MF_DIRECT	GO:0005178~integrin binding	7	0.436954	0.0344116	ESM1, TNXB, NOV, TCAM1, ICAM5, TGFBI, CYR61	1172	28	13095	2.7933
GOTERM_MF_DIRECT	GO:0000981~RNA polymerase II transcription factor activity, sequence-specific DNA binding	22	1.37328	0.035684	FOXA1, EHF, JUN, JUND, FOXJ3, TWIST1, ETV1, OVOL1, ETV4, ETS1, ETV5, ELK3, NFKB2, RUNX1, FOXS1, ZMYM1, NFIA, TFDP2, PLAGL1, MYBL2, KIAA1958, ATF4	1172	155	13095	1.58587
GOTERM_MF_DIRECT	GO:0003924~GTPase activity	24	1.49813	0.037092	EEFSEC, RAB4A, RALA, ATL3, TUBB, EFL1, ARL1, TUBE1, GTPBP2, GEM, GNAI1, RAB11A, RAB10, TUBA1B, GNG2, RRAS, GNAQ, GNB1, ARHGDIB, RRAGD, RAC2, RAB9A, KRAS, RHOQ	1172	174	13095	1.54113
GOTERM_MF_DIRECT	GO:0008009~chemokine activity	8	0.499376	0.0376766	CXCL8, CCL20, CCL5, GRO1, CXCL3, CCL17, CXCL5, CX3CL1	1172	36	13095	2.48294
GOTERM_MF_DIRECT	GO:0042393~histone binding	9	0.561798	0.0390967	PRMT6, CHAF1B, UHRF1, ATAD2, ANP32E, HMGB2, CKS2, CKS1B, ASF1B	1172	44	13095	2.28543
GOTERM_MF_DIRECT	GO:0004860~protein kinase inhibitor activity	9	0.561798	0.0390967	DNAJC3, SOCS3, SOCS1, CISH, CAMK2N1, CHP1, TRIB3, SOCS7, SOCS5	1172	44	13095	2.28543
GOTERM_MF_DIRECT	GO:0050840~extracellular matrix binding	6	0.374532	0.0413414	OLFML2B, ITGA2B, SPP1, ITGAV, TGFBI, CYR61	1172	22	13095	3.04724
GOTERM_MF_DIRECT	GO:0016641~oxidoreductase activity, acting on the CH-NH2 group of donors, oxygen as acceptor	3	0.187266	0.0424256	LOXL3, LOXL4, LOXL2	1172	4	13095	8.37991
Enrichment results of GO by genes with decreased expression 72h p.i. with strain cp
Category	Term	Count	%	PValue	Genes	List Total	Pop Hits	Pop Total	Fold Enrichment
GOTERM_BP_DIRECT	GO:0008152~metabolic process	20	1.38504	8.70072e-05	ARSA, UGT1A1, EPHX2, ECI2, ACSL5, HDHD3, ACAT2, FAHD2A, SGSH, HADHB, PM20D1, NAT1, GSTA3, GSTA2, ARSK, CD38, ARSG, UGT2A1, ARSB, ISOC2	1094	92	13824	2.747
GOTERM_BP_DIRECT	GO:0042773~ATP synthesis coupled electron transport	5	0.34626	0.000512109	NDUFA7, COX2, ND4L, ND5, ND4	1094	6	13824	10.5302
GOTERM_BP_DIRECT	GO:0006979~response to oxidative stress	14	0.969529	0.000806036	PRNP, NQO1, GPX3, OGG1, IDH1, ETFDH, DHCR24, PSEN1, MSRA, NDUFS8, ALS2, NAPRT, MSRB2, HMOX1	1094	61	13824	2.90011
GOTERM_BP_DIRECT	GO:0006099~tricarboxylic acid cycle	8	0.554017	0.00327276	IDH1, OGDH, ACO1, OGDHL, PDHB, ACO2, SDHD, SDHA	1094	26	13824	3.88806
GOTERM_BP_DIRECT	GO:2001235~positive regulation of apoptotic signaling pathway	7	0.484765	0.00464761	MAPK9, TRAF7, CASP2, CTSH, INHBB, TGFBR1, CTSC	1094	21	13824	4.21207
GOTERM_BP_DIRECT	GO:0055114~oxidation-reduction process	39	2.70083	0.00621047	ND6, DHRS13, NXN, COX15, TM7SF2, CYB561D2, CYB5R4, NSDHL, ALDH2, FADS6, MARC2, RDH10, AAED1, GPX3, RSAD1, HSD3B1, CYBRD1, SDHA, PTGR1, FAM213A, COQ7, DHRS3, SUMF1, DHFR, ALDH4A1, MSRA, POR, TMLHE, NDUFS8, CYP2U1, ADI1, NDUFS5, APEX1, TBXAS1, CAT, PCYOX1L, RDH5, DHCR7, GLYR1	1094	316	13824	1.55953
GOTERM_BP_DIRECT	GO:0006486~protein glycosylation	14	0.969529	0.00623433	GALNT12, B3GALNT1, ST8SIA1, FUT10, GALNT18, B3GALT4, ALG1, PSEN1, FUT4, EXT1, FUT6, ST8SIA4, GCNT3, ST3GAL5	1094	76	13824	2.32772
GOTERM_BP_DIRECT	GO:0006695~cholesterol biosynthetic process	7	0.484765	0.00940191	IDI1, NSDHL, APOA1, DHCR24, DHCR7, LSS, TM7SF2	1094	24	13824	3.68556
GOTERM_BP_DIRECT	GO:0006509~membrane protein ectodomain proteolysis	6	0.415512	0.0109873	BACE2, NCSTN, SPPL2A, DAG1, PSEN2, PSEN1	1094	18	13824	4.21207
GOTERM_BP_DIRECT	GO:0006120~mitochondrial electron transport, NADH to ubiquinone	5	0.34626	0.011493	NDUFA7, NDUFV2, ND2, DLD, ND4	1094	12	13824	5.26508
GOTERM_BP_DIRECT	GO:0097503~sialylation	4	0.277008	0.0135424	ST6GALNAC2, ST8SIA1, ST8SIA4, ST3GAL5	1094	7	13824	7.22068
GOTERM_BP_DIRECT	GO:0071711~basement membrane organization	4	0.277008	0.0135424	FLRT2, COL4A1, DAG1, SPINT2	1094	7	13824	7.22068
GOTERM_BP_DIRECT	GO:0060317~cardiac epithelial to mesenchymal transition	4	0.277008	0.0135424	TGFBR3, TGFB2, WNT2, TGFBR1	1094	7	13824	7.22068
GOTERM_BP_DIRECT	GO:0016311~dephosphorylation	8	0.554017	0.0153971	THTPA, PFKFB2, PHOSPHO2, ALPL, DUSP18, NT5C2, HDHD2, THNSL2	1094	34	13824	2.97322
GOTERM_BP_DIRECT	GO:0046464~acylglycerol catabolic process	3	0.207756	0.0177522	ABHD12, ABHD2, ABHD6	1094	3	13824	12.6362
GOTERM_BP_DIRECT	GO:0016267~O-glycan processing, core 1	3	0.207756	0.0177522	LOC523130, C1GALT1C1, C1GALT1	1094	3	13824	12.6362
GOTERM_BP_DIRECT	GO:0051603~proteolysis involved in cellular protein catabolic process	8	0.554017	0.0179702	CTSA, SCPEP1, CLPP, CTSH, CTSV, CTSS, CTSC, LGMN	1094	35	13824	2.88827
GOTERM_BP_DIRECT	GO:0002230~positive regulation of defense response to virus by host	15	1.03878	0.0184055	SLC35B3, FGFBP1, MBD5, DDX58, STAT2, MRPS10, SLC1A3, ATP1B1, TMEM173, MYLK, MAVS, STOM, ALPK1, ZNF189, SCN1A	1094	96	13824	1.97441
GOTERM_BP_DIRECT	GO:0009952~anterior/posterior pattern specification	12	0.831025	0.0188353	HOXA10, EMX2, BMPR2, LHX1, HOXA3, HOXA2, CELSR1, HOXA7, HOXA6, HOXB7, TGFBR1, HOXA5	1094	69	13824	2.1976
GOTERM_BP_DIRECT	GO:0019367~fatty acid elongation, saturated fatty acid	4	0.277008	0.0204078	ELOVL4, ELOVL5, ELOVL2, ELOVL6	1094	8	13824	6.3181
GOTERM_BP_DIRECT	GO:0034626~fatty acid elongation, polyunsaturated fatty acid	4	0.277008	0.0204078	ELOVL4, ELOVL5, ELOVL2, ELOVL6	1094	8	13824	6.3181
GOTERM_BP_DIRECT	GO:0032727~positive regulation of interferon-alpha production	4	0.277008	0.0204078	MAVS, TBK1, DDX58, TLR4	1094	8	13824	6.3181
GOTERM_BP_DIRECT	GO:0009653~anatomical structure morphogenesis	4	0.277008	0.0204078	FBN2, LHX1, FSCN1, FBN1	1094	8	13824	6.3181
GOTERM_BP_DIRECT	GO:0034625~fatty acid elongation, monounsaturated fatty acid	4	0.277008	0.0204078	ELOVL4, ELOVL5, ELOVL2, ELOVL6	1094	8	13824	6.3181
GOTERM_BP_DIRECT	GO:0030855~epithelial cell differentiation	10	0.692521	0.0219825	VIL1, FZD1, UPK1A, TST, PTER, DLX5, CASP6, DLX6, TPP1, FGFR2	1094	53	13824	2.38419
GOTERM_BP_DIRECT	GO:0010468~regulation of gene expression	11	0.761773	0.0227192	FUT8, SCARA5, LHX1, FAM46A, CYP1A2, EIF4A3, TOB2, F2, ATP1B1, NARFL, TGFBR1	1094	62	13824	2.24191
GOTERM_BP_DIRECT	GO:0006814~sodium ion transport	7	0.484765	0.0236861	SLC10A6, COMMD9, SLC38A7, SLC5A11, COMMD3, ATP1B1, SLC4A4	1094	29	13824	3.05012
GOTERM_BP_DIRECT	GO:0031032~actomyosin structure organization	6	0.415512	0.0259675	CNN2, CNN1, EPB41L4A, EPB41L3, TRPM7, F11R	1094	22	13824	3.44624
GOTERM_BP_DIRECT	GO:0048703~embryonic viscerocranium morphogenesis	4	0.277008	0.0288396	NDST1, RDH10, LHX1, HOXA2	1094	9	13824	5.61609
GOTERM_BP_DIRECT	GO:0050673~epithelial cell proliferation	4	0.277008	0.0288396	NCSTN, COL8A2, C23H6ORF89, PSEN1	1094	9	13824	5.61609
GOTERM_BP_DIRECT	GO:0098869~cellular oxidant detoxification	7	0.484765	0.0321134	AAED1, GPX3, NXN, SESN1, CAT, MGST2, FAM213A	1094	31	13824	2.85333
GOTERM_BP_DIRECT	GO:0007016~cytoskeletal anchoring at plasma membrane	3	0.207756	0.0336489	EPB41L3, DAG1, TLN2	1094	4	13824	9.47715
GOTERM_BP_DIRECT	GO:0010499~proteasomal ubiquitin-independent protein catabolic process	3	0.207756	0.0336489	PSME4, KEAP1, NFE2L2	1094	4	13824	9.47715
GOTERM_BP_DIRECT	GO:0030168~platelet activation	6	0.415512	0.0367905	FGB, FGA, F8, FZD6, F2, F5	1094	24	13824	3.15905
GOTERM_BP_DIRECT	GO:0030282~bone mineralization	6	0.415512	0.0367905	WNT11, PKDCC, ASPN, PHEX, FGFR2, LGR4	1094	24	13824	3.15905
GOTERM_BP_DIRECT	GO:0051216~cartilage development	7	0.484765	0.0369732	CSGALNACT1, SMAD1, EDN1, PRRX1, MGP, HOXA3, ITGB8	1094	32	13824	2.76417
GOTERM_BP_DIRECT	GO:0006520~cellular amino acid metabolic process	4	0.277008	0.038825	PM20D1, CLN3, DDC, ACY1	1094	10	13824	5.05448
GOTERM_BP_DIRECT	GO:0050435~beta-amyloid metabolic process	4	0.277008	0.038825	BACE2, NCSTN, MME, PSEN2	1094	10	13824	5.05448
GOTERM_BP_DIRECT	GO:0070372~regulation of ERK1 and ERK2 cascade	5	0.34626	0.0402991	PKHD1, ERBB2, APIP, PTPN6, FGFR2	1094	17	13824	3.71653
GOTERM_BP_DIRECT	GO:0014068~positive regulation of phosphatidylinositol 3-kinase signaling	9	0.623269	0.041012	PRR5, TGFB2, ANGPT1, SEMA4D, HGF, CAT, PTPN6, F2, NKX3-1	1094	50	13824	2.27452
GOTERM_BP_DIRECT	GO:0006879~cellular iron ion homeostasis	7	0.484765	0.042279	SCARA5, SLC40A1, HMOX1, ACO1, CP, FXN, BMP6	1094	33	13824	2.68041
GOTERM_BP_DIRECT	GO:0009611~response to wounding	6	0.415512	0.0430978	GRIN2A, TGFB2, NMNAT1, ABHD2, SLC1A3, SULF2	1094	25	13824	3.03269
GOTERM_BP_DIRECT	GO:0051781~positive regulation of cell division	6	0.415512	0.0430978	BTC, TGFB2, CAT, IGF2, FGFR2, NKX3-1	1094	25	13824	3.03269
GOTERM_BP_DIRECT	GO:0042472~inner ear morphogenesis	8	0.554017	0.0499544	PRRX1, DLX5, DLX6, COL11A1, FZD6, CELSR1, EPHB2, FGFR2	1094	43	13824	2.35092
GOTERM_CC_DIRECT	GO:0070062~extracellular exosome	247	17.1053	1.28873e-10	SLC46A3, CISD1, CLDN2, F11R, FNBP1L, SLC4A4, LIPA, TXNDC16, NUDT3, MYLK, GJA1, ISLR, DAG1, PRSS8, THSD7A, GLUL, CUBN, ATP6V1G1, FBXO2, P3H1, RNASE4, HOGA1, CMBL, PDZK1, UPB1, CD2AP, SCAMP2, GINM1, ATP6V0D1, PLPP3, CUTA, TMEM63A, TEX264, CFI, C15H11ORF52, NEDD4L, XPC, C3, PKHD1, NCSTN, HSPH1, SNX2, APOM, FLRT2, PPCS, MARC2, NEU1, COX2, CD14, A2M, ARSB, S100A10, ATP6V1C2, ST14, FUCA2, IGF2, GP2, RA…	1208	2162	15461	1.46222
GOTERM_CC_DIRECT	GO:0005764~lysosome	33	2.28532	2.91818e-08	HEXA, BCL10, CTSV, CTSS, GABARAP, CLN3, GJA1, AP5M1, DRAM1, SMPD1, NEU1, CTSH, AGA, CAPN1, AP5S1, CTSD, CTSC, CTSA, ARSA, MANBA, ARRDC3, NAGA, TMEM175, LMBRD1, RRAGC, NAAA, PLBD1, TPP1, LAMTOR1, ADA, LGMN, IFNAR1, PCYOX1	1208	141	15461	2.99547
GOTERM_CC_DIRECT	GO:0005765~lysosomal membrane	36	2.49307	3.91916e-07	TMEM63A, RAB5C, SPPL2A, MFSD8, CLN3, NCSTN, AP5M1, LAMP1, BLOC1S1, SMPD1, NEU1, ATP6V0A2, ENPP1, SPG11, ATP6V1D, VPS39, VPS16, ATP6V1C2, ATP6V1G1, STARD3NL, GAA, CTNS, DNAJC13, MCOLN1, CP, GDAP2, TMEM175, IGF2R, LMBRD1, VPS41, PQLC2, SPNS1, TMEM106B, LAMTOR1, ATP6V0D1, SLC29A3	1208	180	15461	2.55977
GOTERM_CC_DIRECT	GO:0005743~mitochondrial inner membrane	41	2.83934	0.000346953	ABCD3, COX15, ATP6, AK2, MRPS10, SLC3A1, DUSP18, MAIP1, MRPL54, MTG1, MPC1, MTG2, MARC2, THEM4, CKMT1B, COX2, SLC25A21, COX1, MPV17, NDUFA7, MRPL27, ACSL5, SDHD, BCS1L, SDHA, TTC19, SIRT3, HADHB, CYP27A1, ALDH3A2, GATM, GPAM, TST, SPNS1, SFXN4, ND1, CYTB, ND2, SFXN5, ND5, SLC25A35	1208	292	15461	1.7971
GOTERM_CC_DIRECT	GO:0005739~mitochondrion	98	6.7867	0.00040112	ECI2, NUDT2, OGDHL, THG1L, NFU1, LACTB, GJA1, PDK3, CAPN1, MPV17, GLUL, STARD5, OXSM, RSAD1, ACSL6, ACOT13, CD3EAP, HOGA1, THNSL1, SDHA, HDHD3, DNAJC30, ND5, ND4, ND6, ATP6, AK2, NAIF1, ARL2, ABHD6, TMTC1, PSEN1, ACAT2, BLOC1S1, COX3, THEM4, COX2, TNRC18, NDUFV2, PRNP, RMDN2, ACADSB, MSRA, MAVS, NDUFAF7, OGDH, PEMT, ACO1, TPP1, CYTB, ACO2, DHX29, OGG1, MRPS10, HSCB, MAIP1, SYNE2, TCHP, MTG1, RARS…	1208	887	15461	1.41408
GOTERM_CC_DIRECT	GO:0070469~respiratory chain	6	0.415512	0.00444938	ND6, COX2, COX1, CYTB, ND2, ND5	1208	15	15461	5.11954
GOTERM_CC_DIRECT	GO:0030176~integral component of endoplasmic reticulum membrane	14	0.969529	0.00445426	SLC35B3, ANKLE2, ELOVL4, ELOVL5, ELOVL2, DOLK, ELOVL6, MARCH6, TM7SF2, EXT1, STIM1, DOLPP1, UBXN8, DHCR7	1208	74	15461	2.4214
GOTERM_CC_DIRECT	GO:0005929~cilium	15	1.03878	0.00586541	EVC2, TRAF3IP1, LCA5, IFT122, ATP2B2, LRRC6, ANKMY2, IFT74, TTC30B, KIF3B, BBS12, TRPV4, TTC21B, ATP6V1D, DLD	1208	85	15461	2.25862
GOTERM_CC_DIRECT	GO:0005759~mitochondrial matrix	20	1.38504	0.0117125	PDHX, ALAS1, OAT, MTERF2, GLRX5, PDHB, REXO2, MAIP1, ACADSB, SIRT3, ALDH4A1, FABP3, TMLHE, ALDH2, TST, BLOC1S1, MTG1, CLPP, PCCB, OGDH	1208	139	15461	1.84156
GOTERM_CC_DIRECT	GO:0005783~endoplasmic reticulum	54	3.73961	0.012498	ANKLE2, KEAP1, DBI, CLU, PHEX, GJA1, UPK1A, SEC62, SIL1, CUBN, TRAPPC2L, KSR1, FBXO2, ZDHHC13, P3H1, ELOVL6, ALG1, SLC39A14, SUMF1, ALDH3A2, HADHB, RCN2, FNDC4, STIM1, RNF128, CLDN8, CHI3L1, ERP27, ZP3, ATL1, YTHDC2, MGST2, PSEN1, GRIN2A, CYB5R4, NCSTN, EBP, RNF139, ASNA1, STOM, AGA, RIC3, PRNP, ERLIN1, ATP2B2, HPS6, BFAR, DHCR24, SULF2, TBL2, TMEM98, APEX1, ACO1, DHCR7	1208	497	15461	1.39062
GOTERM_CC_DIRECT	GO:0031902~late endosome membrane	9	0.623269	0.0167796	AP5M1, VPS4B, VPS41, SPPL2A, TMEM106B, LAMTOR1, SLC29A3, VPS39, VPS16	1208	43	15461	2.67883
GOTERM_CC_DIRECT	GO:0005770~late endosome	13	0.900277	0.0173306	PIK3R4, DYSF, CTNS, NMNAT2, IGF2R, CLN3, GJA1, AP5M1, RNF128, VPS41, AP5S1, IFNAR1, VPS16	1208	78	15461	2.13314
GOTERM_CC_DIRECT	GO:0005747~mitochondrial respiratory chain complex I	9	0.623269	0.0276663	NDUFA7, NDUFS8, NDUFS5, ND1, ND4L, NDUFV2, ND2, ND5, ND4	1208	47	15461	2.45084
GOTERM_CC_DIRECT	GO:0072562~blood microparticle	12	0.831025	0.0304739	C3, FGB, PSMC5, C1S, AHSG, APOA1, STOM, GC, A2M, F2, CP, KNG1	1208	75	15461	2.04781
GOTERM_CC_DIRECT	GO:0000139~Golgi membrane	26	1.80055	0.0322023	GALNT12, GALNT11, LMAN2L, TMEM167A, PGAP3, FUT10, ATL1, GALNT18, CUL3, PSEN2, C23H6ORF89, PSEN1, ATP2C2, FUT4, GABARAP, FUT6, GCNT3, PMEPA1, BCAP31, B3GALNT1, CSNK1A1, GLCE, B3GALT4, ZDHHC13, EXT1, SEC22B	1208	217	15461	1.5335
GOTERM_CC_DIRECT	GO:0032777~Piccolo NuA4 histone acetyltransferase complex	3	0.207756	0.0328525	ING3, KAT5, EPC2	1208	4	15461	9.59913
GOTERM_CC_DIRECT	GO:0032580~Golgi cisterna membrane	7	0.484765	0.0350609	CSGALNACT1, FUT6, FUT8, FUT10, YIPF5, GAL3ST3, FUT4	1208	32	15461	2.79975
GOTERM_CC_DIRECT	GO:0005615~extracellular space	90	6.23269	0.0397101	CPM, COL18A1, UCN, NRP1, SPON1, SERPINA14, ECM2, BMPR2, WNT2B, CXCL17, CTSV, METRNL, CLU, CTSS, SMPD1, C1QTNF6, DAG1, TIMP2, H2B, SOSTDC1, CTSH, ENPP1, PRSS8, LBP, CTSD, SIL1, ADAMTS9, CTSC, TSHB, TIMP4, SERPINB1, EDN1, FGFBP1, EDN2, GIF, GPX3, HGF, IGFBP2, F5, BTC, TGFBR3, TMIGD2, TST, TFF3, PLBD1, CHI3L1, FAM20C, SPACA3, XCL1, ANG, ZP3, SMPDL3A, GRP, CNP, CFI, DPT, FSTL1, SELENBP1, C3, WNT6, WN…	1208	950	15461	1.21252
GOTERM_CC_DIRECT	GO:0043231~intracellular membrane-bounded organelle	17	1.17729	0.0409521	DYRK4, RIC3, GRN, MANBA, ABCA3, IFIT5, ATP2B2, HSD17B11, IGF1R, TRAF7, GRB14, COL4A2, RABEP2, CYP1A2, ATP13A4, CYP1A1, LOC781988	1208	128	15461	1.69985
GOTERM_CC_DIRECT	GO:0010008~endosome membrane	10	0.692521	0.0420503	SNX2, GRB14, LAMP1, RAB15, CPTP, VTA1, NCF4, ERBB2, ATP6V0A2, TMEM175	1208	60	15461	2.13314
GOTERM_CC_DIRECT	GO:0045121~membrane raft	15	1.03878	0.0470597	PRNP, ANGPT1, PLLP, BCL10, PSEN1, TGFBR1, LAT2, LAMP1, SMPD1, DAG1, STOM, LAMTOR1, CD14, CARD11, S100A10	1208	110	15461	1.7453
GOTERM_MF_FAT	GO:0043167~ion binding	287	19.8753	0.00038502	ZNF175, SPON1, RFESD, CISD1, NUDT3, IKZF4, MYLK, NFU1, DAG1, ADNP2, HABP2, ARSA, SLC34A2, CUBN, STARD5, RSAD1, EBF1, P3H1, ZNF12, HDHD2, LOC100124497, OVOL2, CYP27A1, ZFYVE16, CYP2U1, RNF128, CYP2C87, PADI4, TRIM10, TRIM11, RNF122, CUTA, ZNF397, ZNF274, L3MBTL2, LMAN2L, RNF219, PRPSAP1, CYB5R4, MARC2, ARSK, HMOX1, COX2, COX1, S100A10, TOE1, JAG1, DTNB, CYP4F2, NARFL, CP, PM20D1, EXT1, CYP26A1, AD…	1001	3115	12920	1.18919
GOTERM_MF_FAT	GO:0016651~oxidoreductase activity, acting on NAD(P)H	16	1.10803	0.000716842	ND6, NQO1, NDUFA7, NXN, COX15, ND4L, CYB5R4, POR, NDUFS8, NOX4, ND1, NDUFV2, ND2, DLD, ND5, ND4	1001	77	12920	2.68199
GOTERM_MF_FAT	GO:0046872~metal ion binding	272	18.8366	0.000726318	ZNF175, SPON1, RFESD, CISD1, NUDT3, IKZF4, MYLK, NFU1, DAG1, ADNP2, HABP2, ARSA, SLC34A2, CUBN, RSAD1, EBF1, P3H1, ZNF12, HDHD2, LOC100124497, OVOL2, CYP27A1, ZFYVE16, CYP2U1, RNF128, CYP2C87, PADI4, TRIM10, TRIM11, RNF122, CUTA, ZNF397, ZNF274, L3MBTL2, LMAN2L, RNF219, PRPSAP1, CYB5R4, MARC2, ARSK, HMOX1, COX2, COX1, S100A10, TOE1, JAG1, DTNB, CYP4F2, NARFL, CP, PM20D1, EXT1, CYP26A1, ADI1, CYP1…	1001	2961	12920	1.18566
GOTERM_MF_FAT	GO:0051536~iron-sulfur cluster binding	13	0.900277	0.000842329	RFESD, RSAD1, ETFDH, CISD1, NARFL, NFU1, NDUFS8, EXO5, ACO1, ACO2, NDUFV2, MOCS1, FXN	1001	55	12920	3.05077
GOTERM_MF_FAT	GO:0051540~metal cluster binding	13	0.900277	0.000842329	RFESD, RSAD1, ETFDH, CISD1, NARFL, NFU1, NDUFS8, EXO5, ACO1, ACO2, NDUFV2, MOCS1, FXN	1001	55	12920	3.05077
GOTERM_MF_FAT	GO:0043169~cation binding	273	18.9058	0.00100496	ZNF175, SPON1, RFESD, CISD1, NUDT3, IKZF4, MYLK, NFU1, DAG1, ADNP2, HABP2, ARSA, SLC34A2, CUBN, RSAD1, EBF1, P3H1, ZNF12, HDHD2, LOC100124497, OVOL2, CYP27A1, ZFYVE16, CYP2U1, RNF128, CYP2C87, PADI4, TRIM10, TRIM11, RNF122, CUTA, ZNF397, ZNF274, L3MBTL2, LMAN2L, RNF219, PRPSAP1, CYB5R4, MARC2, ARSK, HMOX1, COX2, COX1, S100A10, TOE1, JAG1, DTNB, CYP4F2, NARFL, CP, PM20D1, EXT1, CYP26A1, ADI1, CYP1…	1001	2990	12920	1.17847
GOTERM_MF_FAT	GO:0016765~transferase activity, transferring alkyl or aryl (other than methyl) groups	13	0.900277	0.0013811	COQ2, MAT2A, GSTA3, MMAB, GSTA2, FNTB, HMBS, MGST2, GSTT2, PDSS2, GSTT1, GDAP1	1001	58	12920	2.89297
GOTERM_MF_FAT	GO:0048037~cofactor binding	33	2.28532	0.00172781	DDC, PDXK, ALAS1, OAT, ECI2, ETFDH, DBI, OGDHL, TM7SF2, CYB5R4, SPTLC1, GMDS, CREG1, MARC2, ME3, DUS4L, IDH1, DHCR24, SDHD, SDHA, THNSL1, THNSL2, ACADSB, SIRT3, DHFR, SQLE, POR, CAT, OGDH, CYTB, DHCR7, DLD, GLYR1	1001	240	12920	1.77473
GOTERM_MF_FAT	GO:0051539~4 iron, 4 sulfur cluster binding	9	0.623269	0.00197959	NFU1, NDUFS8, RSAD1, ETFDH, EXO5, ACO1, ACO2, NARFL, MOCS1	1001	31	12920	3.74722
GOTERM_MF_FAT	GO:0016655~oxidoreductase activity, acting on NAD(P)H, quinone or similar compound as acceptor	10	0.692521	0.00244581	ND6, NQO1, NDUFA7, NDUFS8, ND1, ND4L, NDUFV2, ND2, ND5, ND4	1001	39	12920	3.30951
GOTERM_MF_FAT	GO:0019838~growth factor binding	10	0.692521	0.00294322	FGFBP1, TGFB3, IL2RA, IGFBP2, HTRA1, A2M, FGFR2, TGFBR1, IGF2R, IGF1R	1001	40	12920	3.22677
GOTERM_MF_FAT	GO:0008137~NADH dehydrogenase (ubiquinone) activity	9	0.623269	0.0030347	ND6, NDUFA7, NDUFS8, ND1, ND4L, NDUFV2, ND2, ND5, ND4	1001	33	12920	3.52012
GOTERM_MF_FAT	GO:0050136~NADH dehydrogenase (quinone) activity	9	0.623269	0.0030347	ND6, NDUFA7, NDUFS8, ND1, ND4L, NDUFV2, ND2, ND5, ND4	1001	33	12920	3.52012
GOTERM_MF_FAT	GO:0030165~PDZ domain binding	7	0.484765	0.00417923	GJA1, PLEKHA1, SDC2, ATP2B2, PSEN1, PDZK1, F11R	1001	21	12920	4.30236
GOTERM_MF_FAT	GO:0003954~NADH dehydrogenase activity	9	0.623269	0.0044823	ND6, NDUFA7, NDUFS8, ND1, ND4L, NDUFV2, ND2, ND5, ND4	1001	35	12920	3.31897
GOTERM_MF_FAT	GO:0015020~glucuronosyltransferase activity	7	0.484765	0.00537613	CSGALNACT1, EXT1, UGT1A1, B3GAT2, UGT2A1, LARGE1, LOC781988	1001	22	12920	4.1068
GOTERM_MF_FAT	GO:0008484~sulfuric ester hydrolase activity	6	0.415512	0.00583714	ARSA, ARSK, ARSG, ARSB, SULF2, SGSH	1001	16	12920	4.84016
GOTERM_MF_FAT	GO:0004312~fatty acid synthase activity	5	0.34626	0.00757044	ELOVL4, ELOVL5, ELOVL2, OXSM, ELOVL6	1001	11	12920	5.86686
GOTERM_MF_FAT	GO:0016757~transferase activity, transferring glycosyl groups	32	2.21607	0.00947608	GALNT12, GALNT11, ST6GALNAC2, FUT10, GALNT18, GTDC1, PIGV, FUT4, FUT6, FUT8, C1GALT1C1, PNP, NAPRT, ST8SIA4, GCNT3, ST3GAL5, UGT2A1, LARGE1, GYG1, CSGALNACT1, LOC523130, B3GALNT1, UGT1A1, ST8SIA1, B3GAT2, C1GALT1, B3GALT4, ALG1, EXT1, PDCL3, PARP11, LOC781988	1001	258	12920	1.60088
GOTERM_MF_FAT	GO:0046906~tetrapyrrole binding	19	1.31579	0.00962609	GIF, CYP4F2, SDHD, CYP2C18, CYP27A1, CYP26A1, CYB5R4, LMBRD1, CYP2U1, CYP2C87, CYP4V2, CYP1A2, TBXAS1, CAT, CYP1A1, HMOX1, COX1, CYTB	1001	128	12920	1.9159
GOTERM_MF_FAT	GO:0004497~monooxygenase activity	15	1.03878	0.0108805	MOXD1, CYP4F2, MSMO1, CYP2C18, COQ7, CYP27A1, SQLE, CYP26A1, CYP2U1, CYP2C87, CYP4V2, CYP1A2, TBXAS1, CYP1A1	1001	92	12920	2.10442
GOTERM_MF_FAT	GO:0005506~iron ion binding	22	1.52355	0.0110187	CYP4F2, P3H1, MSMO1, CYP2C18, NFU1, CYP27A1, CYP26A1, TMLHE, CYP2U1, CYP2C87, ADI1, CYP4V2, CYP1A2, TBXAS1, CYP1A1, SC5D, COX1, ACO2, P4HTM, FXN, FTL	1001	159	12920	1.78589
GOTERM_MF_FAT	GO:0005507~copper ion binding	10	0.692521	0.0118427	CUTA, MOXD1, PRNP, F8, COX2, ANG, CP, SOD3, METTL17, F5	1001	49	12920	2.6341
GOTERM_MF_FAT	GO:0050662~coenzyme binding	22	1.52355	0.0126042	IDH1, ECI2, DBI, OGDHL, DHCR24, SDHA, ACADSB, SIRT3, TM7SF2, DHFR, SQLE, CYB5R4, POR, GMDS, MARC2, CAT, OGDH, ME3, DHCR7, DUS4L, DLD, GLYR1	1001	161	12920	1.7637
GOTERM_MF_FAT	GO:0046914~transition metal ion binding	112	7.75623	0.013941	JADE1, MSMO1, CNDP2, NFU1, FNTB, LARGE1, MORC3, APLP2, P3H1, ZCRB1, CGRRF1, DCTD, CYP27A1, RNF128, CYP2U1, CYP2C87, TRIM10, TRIM11, RNF122, FTL, CUTA, L3MBTL2, UBR3, RNF219, DTX2, CYP2C18, MARC2, COX2, COX1, PRNP, DTNB, CYP4F2, BFAR, MARCH6, CP, PM20D1, CYP26A1, ADI1, LHX2, LHX1, CYP1A2, TBXAS1, CYP1A1, RNF183, ACO2, RNF186, DZIP3, ADA, PHF3, CPM, RNF10, MOXD1, ACY1, THRA, APIP, PHF7, PEPD, CALB1…	1001	1174	12920	1.23134
GOTERM_MF_FAT	GO:0004551~nucleotide diphosphatase activity	5	0.34626	0.0144812	ENPP1, NUDT2, FHIT, NUDT3, NUDT12	1001	13	12920	4.96427
GOTERM_MF_FAT	GO:0016705~oxidoreductase activity, acting on paired donors, with incorporation or reduction of molecular oxygen	20	1.38504	0.0163203	MOXD1, CYP4F2, P3H1, MSMO1, CYP2C18, COQ7, CYP27A1, SQLE, CYP26A1, TMLHE, CYP2U1, CYP2C87, CYP4V2, CYP1A2, TBXAS1, CYP1A1, HMOX1, SC5D, P4HTM	1001	145	12920	1.78029
GOTERM_MF_FAT	GO:0016263~glycoprotein-N-acetylgalactosamine 3-beta-galactosyltransferase activity	3	0.207756	0.0170306	LOC523130, C1GALT1C1, C1GALT1	1001	3	12920	12.9071
GOTERM_MF_FAT	GO:0016627~oxidoreductase activity, acting on the CH-CH group of donors	10	0.692521	0.017247	COX15, RSAD1, DHCR24, SDHD, DHCR7, SDHA, DUS4L, PTGR1, ACADSB, TM7SF2	1001	52	12920	2.48213
GOTERM_MF_FAT	GO:0102338~3-oxo-lignoceronyl-CoA synthase activity	4	0.277008	0.0192663	ELOVL4, ELOVL5, ELOVL2, ELOVL6	1001	8	12920	6.45355
GOTERM_MF_FAT	GO:0009922~fatty acid elongase activity	4	0.277008	0.0192663	ELOVL4, ELOVL5, ELOVL2, ELOVL6	1001	8	12920	6.45355
GOTERM_MF_FAT	GO:0048531~beta-1,3-galactosyltransferase activity	4	0.277008	0.0192663	LOC523130, B3GALNT1, C1GALT1C1, C1GALT1	1001	8	12920	6.45355
GOTERM_MF_FAT	GO:0102337~3-oxo-cerotoyl-CoA synthase activity	4	0.277008	0.0192663	ELOVL4, ELOVL5, ELOVL2, ELOVL6	1001	8	12920	6.45355
GOTERM_MF_FAT	GO:0102336~3-oxo-arachidoyl-CoA synthase activity	4	0.277008	0.0192663	ELOVL4, ELOVL5, ELOVL2, ELOVL6	1001	8	12920	6.45355
GOTERM_MF_FAT	GO:0016863~intramolecular oxidoreductase activity, transposing C=C bonds	4	0.277008	0.0192663	IDI1, EBP, HSD3B1, ECI2	1001	8	12920	6.45355
GOTERM_MF_FAT	GO:0020037~heme binding	17	1.17729	0.0225001	CYP4F2, SDHD, CYP2C18, CYP27A1, CYP26A1, CYB5R4, CYP2U1, CYP2C87, CYP4V2, CYP1A2, TBXAS1, CAT, CYP1A1, HMOX1, COX1, CYTB	1001	120	12920	1.8285
GOTERM_MF_FAT	GO:0016722~oxidoreductase activity, oxidizing metal ions	5	0.34626	0.0244267	POR, ETFDH, CYBRD1, CP, FXN	1001	15	12920	4.30236
GOTERM_MF_FAT	GO:0008236~serine-type peptidase activity	22	1.52355	0.0277943	CTSA, CPM, ST14, C1S, C1R, HGF, CFI, HTRA1, TMPRSS2, PRSS36, F2, PRSS23, SCPEP1, DPP7, CLPP, CTSH, MMP19, TPP1, PRSS8, PAMR1, CTSC, HABP2	1001	174	12920	1.63193
GOTERM_MF_FAT	GO:0046915~transition metal ion transmembrane transporter activity	7	0.484765	0.0292949	SLC40A1, SLC39A10, ATP2C2, ZP3, SLC39A2, SLC39A14, SLC39A3	1001	31	12920	2.9145
GOTERM_MF_FAT	GO:0016620~oxidoreductase activity, acting on the aldehyde or oxo group of donors, NAD or NADP as acceptor	7	0.484765	0.0292949	ALDH3A2, ALDH4A1, PDHX, ALDH2, OGDH, PDHB, DLD	1001	31	12920	2.9145
GOTERM_MF_FAT	GO:0004364~glutathione transferase activity	7	0.484765	0.0292949	GSTA3, GSTA2, GSTT2, MGST2, GSTT1, GDAP1	1001	31	12920	2.9145
GOTERM_MF_FAT	GO:0005499~vitamin D binding	3	0.207756	0.0323188	S100G, CALB1, GC	1001	4	12920	9.68032
GOTERM_MF_FAT	GO:0005114~type II transforming growth factor beta receptor binding	3	0.207756	0.0323188	TGFB2, TGFB3, TGFBR1	1001	4	12920	9.68032
GOTERM_MF_FAT	GO:0048039~ubiquinone binding	3	0.207756	0.0323188	ETFDH, CYTB, SDHD	1001	4	12920	9.68032
GOTERM_MF_FAT	GO:0017171~serine hydrolase activity	22	1.52355	0.0327362	CTSA, CPM, ST14, C1S, C1R, HGF, CFI, HTRA1, TMPRSS2, PRSS36, F2, PRSS23, SCPEP1, DPP7, CLPP, CTSH, MMP19, TPP1, PRSS8, PAMR1, CTSC, HABP2	1001	177	12920	1.60427
GOTERM_MF_FAT	GO:0016903~oxidoreductase activity, acting on the aldehyde or oxo group of donors	8	0.554017	0.0361313	ALDH3A2, ALDH4A1, PDHX, ALDH2, OGDH, OGDHL, PDHB, DLD	1001	41	12920	2.51846
GOTERM_MF_FAT	GO:0019199~transmembrane receptor protein kinase activity	10	0.692521	0.0364731	TGFBR3, NRP1, NTRK2, BMPR2, ERBB2, EPHA1, EPHB2, FGFR2, TGFBR1, IGF1R	1001	59	12920	2.18764
GOTERM_MF_FAT	GO:0016758~transferase activity, transferring hexosyl groups	21	1.45429	0.0373619	CSGALNACT1, LOC523130, B3GALNT1, GALNT11, UGT1A1, FUT10, B3GAT2, C1GALT1, B3GALT4, ALG1, PIGV, FUT4, EXT1, FUT6, C1GALT1C1, FUT8, GCNT3, UGT2A1, LARGE1, GYG1, LOC781988	1001	169	12920	1.60384
GOTERM_MF_FAT	GO:0016810~hydrolase activity, acting on carbon-nitrogen (but not peptide) bonds	15	1.03878	0.0387229	ACY1, HDAC1, CRMP1, WDYHV1, UPB1, SIRT3, DCTD, PM20D1, ADAL, NACC2, NAAA, CAT, PADI4, AGA, ADA	1001	108	12920	1.79265
GOTERM_MF_FAT	GO:0004197~cysteine-type endopeptidase activity	11	0.761773	0.0387653	USP16, CASP6, CAPN7, CASP2, CTSH, ATG4A, CTSV, CAPN1, CTSS, CTSC, LGMN	1001	69	12920	2.05765
GOTERM_MF_FAT	GO:0043168~anion binding	23	1.5928	0.0390954	FCN1, SLC34A2, DDC, PDXK, ALAS1, OAT, STARD5, UGT1A1, PLEKHA1, PLEKHA5, P3H1, SLC1A3, THNSL1, CLCN2, THNSL2, CYP26A1, FABP3, TMLHE, SPTLC1, HNF4A, SESN1, MARC2, P4HTM	1001	191	12920	1.55426
GOTERM_MF_FAT	GO:0016860~intramolecular oxidoreductase activity	8	0.554017	0.0453574	IDI1, EBP, GNPDA1, GNPDA2, HSD3B1, TBXAS1, ECI2, ERP27	1001	43	12920	2.40132
GOTERM_MF_FAT	GO:0004185~serine-type carboxypeptidase activity	4	0.277008	0.0476877	CTSA, CPM, SCPEP1, DPP7	1001	11	12920	4.69349
