# Supplementary material for: Transcriptomic Analysis of MDBK Cells Infected with Cytopathic and Non-Cytopathic Strains of Bovine Viral Diarrhea Virus (BVDV)
Source: Viruses. 2022 Jun 11;14(6):1276. doi: 10.3390/v14061276 (PMC9228727; doi:10.3390/v14061276)
Supplement: Supplementary file 1 [file viruses-14-01276-s001.zip › Table S8_GO enrichment results of the DEGs 24h p.i. with ncp strains.xlsx]

## Sheet: Arkusz1
Enrichment results of GO by genes with increased expression 24h p,i, with strain ncp
Category	Term	Count	%	PValue	Genes	List Total	Pop Hits	Pop Total	Fold Enrichment
GOTERM_BP_DIRECT	GO:0007186~G-protein coupled receptor signaling pathway	40	8.31601	2.43409e-05	LOC788079, LOC787385, CXCL8, LOC509633, LOC511657, LOC508980, LOC508420, LOC510625, CX3CL1, OR2S2, LOC783998, LOC785899, LOC617592, OPN1LW, CCL4, OR2AG2, LOC532486, OR4D9, CCL1, CCL19, OR7D2, CMKLR1, LOC101904911, LOC788323, LOC527415, LOC532403, LOC523753, LOC107131158, GPR50, LOC784681, AGT, VAV1, LOC783205, CCKBR, OR2V2, LPAR5, LOC784897, OR2L13, OR2A5, OR10A3	359	748	13824	2.0592
GOTERM_BP_DIRECT	GO:0007608~sensory perception of smell	16	3.3264	0.00021334	LOC788079, LOC101904911, LOC788323, LOC527415, LOC532403, LOC523753, LOC784681, LOC508420, OR2S2, OR2V2, OR2L13, OR2AG2, CNGA4, DRD2, OR2A5, OR10A3	359	199	13824	3.09604
GOTERM_BP_DIRECT	GO:0048469~cell maturation	6	1.2474	0.00128238	KCNMA1, ANGPTL8, PLP1, PTH1R, GATA3, HES5	359	32	13824	7.22006
GOTERM_BP_DIRECT	GO:0048485~sympathetic nervous system development	4	0.831601	0.00180495	NTRK1, GDNF, GATA3, GFRA3	359	10	13824	15.4028
GOTERM_BP_DIRECT	GO:0006564~L-serine biosynthetic process	3	0.623701	0.00197203	PSAT1, PHGDH, PSPH	359	3	13824	38.507
GOTERM_BP_DIRECT	GO:0070374~positive regulation of ERK1 and ERK2 cascade	11	2.2869	0.00203515	NTRK1, SRC, FGF19, CCL4, HTR2B, ACKR3, CCL1, BRAF, TNFAIP8L3, CCL19, CX3CL1	359	130	13824	3.25828
GOTERM_BP_DIRECT	GO:0007268~chemical synaptic transmission	10	2.079	0.00250182	HTR6, LOC615150, NPBWR1, KCNMA1, HTR2B, SLC6A12, SSTR2, HTR4, SLC18A1, SLC6A4	359	112	13824	3.43812
GOTERM_BP_DIRECT	GO:0001963~synaptic transmission, dopaminergic	4	0.831601	0.00406039	GPR21, DRD2, DRD5, SNCA	359	13	13824	11.8483
GOTERM_BP_DIRECT	GO:0007200~phospholipase C-activating G-protein coupled receptor signaling pathway	6	1.2474	0.00591531	LTB4R2, GALR2, HTR2B, PTH1R, GPR84, ADRA1A	359	45	13824	5.13426
GOTERM_BP_DIRECT	GO:0030593~neutrophil chemotaxis	6	1.2474	0.00712172	CXCL8, CCL4, CCL1, CCL19, VAV1, CX3CL1	359	47	13824	4.91578
GOTERM_BP_DIRECT	GO:0071880~adenylate cyclase-activating adrenergic receptor signaling pathway	4	0.831601	0.00750597	ADRB3, DRD2, ADRA2B, ADRA1A	359	16	13824	9.62674
GOTERM_BP_DIRECT	GO:0055085~transmembrane transport	9	1.8711	0.00776091	SLC25A48, SLC46A2, SV2A, SLC25A41, SLC1A5, SLC25A45, SLC16A14, SLC6A4, LOC100298868	359	110	13824	3.15057
GOTERM_BP_DIRECT	GO:0007267~cell-cell signaling	7	1.4553	0.00821547	GJC2, ADRB3, CD70, NPY, NGF, ADRA2B, ADRA1A	359	68	13824	3.96395
GOTERM_BP_DIRECT	GO:0048538~thymus development	5	1.0395	0.0148967	SLC46A2, BRAF, GATA3, JARID2, EPHB3	359	37	13824	5.20364
GOTERM_BP_DIRECT	GO:0014059~regulation of dopamine secretion	3	0.623701	0.0168883	CHRNA4, DRD2, SNCA	359	8	13824	14.4401
GOTERM_BP_DIRECT	GO:0071356~cellular response to tumor necrosis factor	6	1.2474	0.0169094	CXCL8, CCL4, CCL1, GATA3, CCL19, CX3CL1	359	58	13824	3.98348
GOTERM_BP_DIRECT	GO:0048247~lymphocyte chemotaxis	4	0.831601	0.0184111	CCL4, CCL1, CCL19, CX3CL1	359	22	13824	7.00127
GOTERM_BP_DIRECT	GO:0007154~cell communication	4	0.831601	0.020775	GJC2, GJB5, GJA8, SLC8A2	359	23	13824	6.69686
GOTERM_BP_DIRECT	GO:0006954~inflammatory response	12	2.4948	0.0246005	NGFR, CYP26B1, MMP25, NRROS, CXCL8, LTB4R2, CCL4, PLP1, CCL1, CCL19, LAT, CX3CL1	359	215	13824	2.14923
GOTERM_BP_DIRECT	GO:0060158~phospholipase C-activating dopamine receptor signaling pathway	3	0.623701	0.0262306	GPR21, DRD2, DRD5	359	10	13824	11.5521
GOTERM_BP_DIRECT	GO:0070098~chemokine-mediated signaling pathway	5	1.0395	0.026612	CXCL8, CCL4, CCL1, CCL19, CX3CL1	359	44	13824	4.37579
GOTERM_BP_DIRECT	GO:0043524~negative regulation of neuron apoptotic process	7	1.4553	0.0278867	NTRK1, GABRB2, MT2A, GDNF, BRAF, NGF, SNCA	359	89	13824	3.02864
GOTERM_BP_DIRECT	GO:0030183~B cell differentiation	6	1.2474	0.0279413	ADGRG3, NTRK1, CD79B, IFNT3, IFNB3, TSHR	359	66	13824	3.50063
GOTERM_BP_DIRECT	GO:0007626~locomotory behavior	6	1.2474	0.0295775	SNAP25, OLFM2, MYO15A, TAL1, CHRNA4, DBH	359	67	13824	3.44838
GOTERM_BP_DIRECT	GO:0060291~long-term synaptic potentiation	4	0.831601	0.0318142	SNAP25, TNR, BRAF, SNCA	359	27	13824	5.70474
GOTERM_BP_DIRECT	GO:0051965~positive regulation of synapse assembly	5	1.0395	0.032936	NTRK1, SLITRK1, SYNDIG1, EPHB3, LRRC4B	359	47	13824	4.09649
GOTERM_BP_DIRECT	GO:0071347~cellular response to interleukin-1	5	1.0395	0.032936	CXCL8, CCL4, CCL1, CCL19, CX3CL1	359	47	13824	4.09649
GOTERM_BP_DIRECT	GO:0042127~regulation of cell proliferation	9	1.8711	0.0362246	NFKBIA, NGFR, CXCL8, SRC, TAL1, CDCA7, BRAF, DBH, TYK2	359	146	13824	2.37372
GOTERM_BP_DIRECT	GO:0001975~response to amphetamine	3	0.623701	0.0371856	DBH, DRD2, DRD5	359	12	13824	9.62674
GOTERM_BP_DIRECT	GO:0002548~monocyte chemotaxis	4	0.831601	0.0382754	CCL4, CCL1, CCL19, CX3CL1	359	29	13824	5.31131
GOTERM_BP_DIRECT	GO:0042552~myelination	4	0.831601	0.0491144	EGR2, PLLP, PLP1, MBP	359	32	13824	4.81337
GOTERM_BP_DIRECT	GO:0008306~associative learning	3	0.623701	0.0495648	SNAP25, TNR, DRD5	359	14	13824	8.25149
GOTERM_CC_DIRECT	GO:0016021~integral component of membrane	168	34.9272	1.20196e-10	LOC101905933, KCNG1, SLC46A2, NRROS, TMEM200B, FOLH1B, MLC1, LOC511657, FZD10, SLC8A2, LOC100298868, NIPAL4, CDH6, OR52W1, SLC25A48, FAM174B, LOC532486, SLC25A41, GJA8, SLC25A45, VSIG8, CMKLR1, PAQR9, ENTPD1, APLP1, SLC6A12, UNC5C, SLC51A, SLC51B, STX1B, MAG, LOC783205, IFI27, LOC784897, OR2L13, CLDN9, LOC618633, RELL1, ABCG4, ABCG1, DPEP3, SPATA9, LOC788079, LOC787385, SMIM5, PARM1, OR52D1, LPAR…	402	4185	15461	1.54392
GOTERM_CC_DIRECT	GO:0005887~integral component of plasma membrane	50	10.395	4.04825e-08	KCNK6, GABRB2, GABRB1, HTR2B, SLC2A3, PTH1R, ICAM5, HTR4, ADRA1A, SLC6A4, LOC783998, HTR6, LOC615150, SLC22A16, OPN1LW, CNGA4, SLC18A1, EPHB3, EPHA5, SLC6A12, SSTR2, ADRA2B, SLC7A5, ADRB3, LTB4R2, SCNN1A, SLC29A1, RHCG, LOC509633, ATP1A4, GPR84, CD79B, LOC617592, GALR2, NPBWR1, SYNDIG1, DRD2, DRD5, PLXNA3, NTRK1, NGFR, KCNJ8, ABCA4, GPR50, GPR4, TSHR, CLCN5, SLC6A9, NPHS2	402	820	15461	2.34513
GOTERM_CC_DIRECT	GO:0005886~plasma membrane	93	19.3347	4.62602e-06	SNAP25, GABRB2, NRROS, GLDC, LOC508687, GUCA1A, MLC1, LOC511657, SLC2A3, ADRA1A, RND1, SLC6A4, CDH6, OR52W1, MMP25, LOC785899, CLDN25, LOC532486, OR4D9, TNFAIP8L3, OR52B2, CMKLR1, PAQR9, LYNX1, LOC101904911, LOC527415, APLP1, UNC5C, SLC51A, SLC51B, SSTR2, UPK3A, ADRA2B, KCTD7, STX1B, LOC783205, LOC784897, CCKBR, OR2L13, CLDN9, CDH11, KCNMA1, LY6D, RELL1, LOC524658, ABCG4, OR10A3, CAMK1G, ABCG1, L…	402	2261	15461	1.58195
GOTERM_CC_DIRECT	GO:0031225~anchored component of membrane	4	0.831601	0.0493188	LYNX1, LY6D, GPC2, DPEP3	402	32	15461	4.80752
GOTERM_MF_DIRECT	GO:0004930~G-protein coupled receptor activity	47	9.77131	2.61277e-05	LOC788079, LOC787385, LOC508687, OR52D1, LOC509633, LOC511657, LOC508980, LOC508420, GPR84, FZD10, LOC510625, CRHR2, ADGRG3, OR2S2, LOC783998, OR52W1, LOC785899, LOC617592, NPBWR1, OR2AG2, LOC532486, OR4D9, OR52B2, TAS1R1, OR7D2, GPR157, CMKLR1, LOC788285, LOC101904911, LOC788323, LOC527415, LOC532403, LOC523753, GPR31, LOC107131158, GPR50, GPR4, LOC784681, GPR142, LOC783205, OR2V2, LPAR5, LOC784…	346	932	13095	1.90858
GOTERM_MF_DIRECT	GO:0004984~olfactory receptor activity	35	7.27651	0.00268845	LOC788079, LOC787385, LOC508687, OR52D1, LOC509633, LOC511657, LOC508980, LOC508420, LOC510625, OR2S2, LOC783998, OR52W1, LOC615150, LOC785899, LOC617592, OR2AG2, LOC532486, OR4D9, OR52B2, OR7D2, LOC788285, LOC101904911, LOC788323, LOC527415, LOC532403, LOC523753, LOC107131158, LOC784681, LOC783205, OR2V2, LOC784897, OR2L13, LOC524658, OR2A5, OR10A3	346	780	13095	1.69825
GOTERM_MF_DIRECT	GO:0008009~chemokine activity	5	1.0395	0.0143528	CXCL8, CCL4, CCL1, CCL19, CX3CL1	346	36	13095	5.2565
GOTERM_MF_DIRECT	GO:0035240~dopamine binding	3	0.623701	0.0174461	GPR21, DRD2, DRD5	346	8	13095	14.1926
GOTERM_MF_DIRECT	GO:0005212~structural constituent of eye lens	4	0.831601	0.0192594	LOC538688, CRYBA1, CRYAA, LOC616092	346	22	13095	6.88124
GOTERM_MF_DIRECT	GO:0048020~CCR chemokine receptor binding	4	0.831601	0.0192594	CCL4, CCL1, CCL19, CX3CL1	346	22	13095	6.88124
Enrichment results of GO by genes with decreased expression 24h p,i, with strain ncp
Category	Term	Count	%	PValue	Genes	List Total	Pop Hits	Pop Total	Fold Enrichment
GOTERM_BP_DIRECT	GO:0032729~positive regulation of interferon-gamma production	4	2.24719	0.0051075	TXK, BCL3, IL18, IRF8	132	37	13824	11.3219
GOTERM_CC_DIRECT	GO:0070469~respiratory chain	4	2.24719	0.000331647	ND6, COX1, ND2, ND5	145	15	15461	28.434
GOTERM_CC_DIRECT	GO:0070062~extracellular exosome	29	16.2921	0.0421362	NAPA, SLC26A2, PDXP, FURIN, SCPEP1, STK10, EFEMP2, RNPEP, STOM, CD59, LGALS8, ATP6V1C2, TRMT10A, RRM1, STX7, IL18, EPDR1, NAGA, GATM, HIST3H2A, FABP4, CRISPLD2, COL5A3, COL6A1, DNASE2, IRF6, PLA2R1, FRK, PLA1A	145	2162	15461	1.43025
GOTERM_MF_DIRECT	GO:0008137~NADH dehydrogenase (ubiquinone) activity	5	2.80899	0.000209497	ND6, C10H15ORF48, ND4L, ND2, ND5	119	33	13095	16.673
GOTERM_MF_DIRECT	GO:0005096~GTPase activator activity	6	3.37079	0.0248945	RGS2, RABEP2, TBC1D30, CHN1, RGS9	119	183	13095	3.60793
GOTERM_MF_DIRECT	GO:0008083~growth factor activity	4	2.24719	0.0271312	IL11, MIA, RABEP2, FGF18	119	72	13095	6.11345
