# Supplementary material for: Transcriptomic Analysis of MDBK Cells Infected with Cytopathic and Non-Cytopathic Strains of Bovine Viral Diarrhea Virus (BVDV)
Source: Viruses. 2022 Jun 11;14(6):1276. doi: 10.3390/v14061276 (PMC9228727; doi:10.3390/v14061276)
Supplement: Supplementary file 1 [file viruses-14-01276-s001.zip › Table S9_GO enrichment results of the DEGs 72h p.i. with ncp strains.xlsx]

## Sheet: Arkusz1
Enrichment results of GO by genes with increased expression 72h p.i. with strain ncp
Category	Term	Count	%	PValue	Genes	List Total	Pop Hits	Pop Total	Fold Enrichment
GOTERM_BP_DIRECT	GO:0006564~L-serine biosynthetic process	3	0.7109	0.00151015	PSAT1, PHGDH, PSPH	314	3	13824	44.0255
GOTERM_BP_DIRECT	GO:0043691~reverse cholesterol transport	4	0.947867	0.00165737	ABCA1, APOA2, APOE, ABCG1	314	11	13824	16.0093
GOTERM_BP_DIRECT	GO:0033344~cholesterol efflux	5	1.18483	0.00191492	ABCA1, APOA2, APOE, ABCG4, ABCG1	314	24	13824	9.17197
GOTERM_BP_DIRECT	GO:0033700~phospholipid efflux	4	0.947867	0.00217298	ABCA1, APOA2, APOE, ABCG1	314	12	13824	14.6752
GOTERM_BP_DIRECT	GO:0070262~peptidyl-serine dephosphorylation	3	0.7109	0.00995372	PPP1R15A, PPP1R15B, PPP2R2B	314	7	13824	18.8681
GOTERM_BP_DIRECT	GO:0035556~intracellular signal transduction	14	3.31754	0.0102467	NPR1, TUFT1, TYK2, CIT, ASB10, RPS6KA2, CHN2, RASSF5, GPR182, MKNK2, TSSK3, ASB4, ARHGEF2, SPSB4	314	276	13824	2.23318
GOTERM_BP_DIRECT	GO:0034380~high-density lipoprotein particle assembly	3	0.7109	0.0130744	ABCA1, APOA2, APOE	314	8	13824	16.5096
GOTERM_BP_DIRECT	GO:0051092~positive regulation of NF-kappaB transcription factor activity	7	1.65877	0.0171695	NTRK1, CTH, WNT5A, ARHGEF2, RAB7B, CARD14, MID2	314	91	13824	3.38658
GOTERM_BP_DIRECT	GO:0060070~canonical Wnt signaling pathway	6	1.4218	0.0188126	FZD3, SOX17, FRZB, WNT5A, GLI1, WNT4	314	68	13824	3.8846
GOTERM_BP_DIRECT	GO:0072593~reactive oxygen species metabolic process	4	0.947867	0.0225029	BNIP3, SESN2, DDIT4, NDUFAF2	314	27	13824	6.52229
GOTERM_BP_DIRECT	GO:0030182~neuron differentiation	5	1.18483	0.0262606	DDIT4, WNT5A, NEUROG2, RUNX1, WNT4	314	50	13824	4.40255
GOTERM_BP_DIRECT	GO:0048839~inner ear development	4	0.947867	0.0271994	NEUROD1, C1QTNF5, HPCA, CYTL1	314	29	13824	6.07248
GOTERM_BP_DIRECT	GO:0001963~synaptic transmission, dopaminergic	3	0.7109	0.0338092	RASD2, GPR21, SNCA	314	13	13824	10.1597
GOTERM_BP_DIRECT	GO:0060192~negative regulation of lipase activity	2	0.473934	0.0447725	APOA2, PLIN5	314	2	13824	44.0255
GOTERM_BP_DIRECT	GO:0060029~convergent extension involved in organogenesis	2	0.473934	0.0447725	FRZB, WNT5A	314	2	13824	44.0255
GOTERM_BP_DIRECT	GO:0090090~negative regulation of canonical Wnt signaling pathway	6	1.4218	0.0473868	SOX17, FRZB, SIAH2, WNT5A, GLI1, WNT4	314	87	13824	3.03624
GOTERM_CC_DIRECT	GO:0043005~neuron projection	10	2.36967	0.00292192	NGFR, CXADR, SV2B, SV2A, NPBWR1, LIMK1, SSTR2, SLC6A2, ATF4, SLC6A4	353	130	15461	3.36914
GOTERM_CC_DIRECT	GO:0005887~integral component of plasma membrane	29	6.87204	0.0212688	LOC509633, SLC2A1, SLC2A3, GPR84, ADRA1A, TSPAN11, SLC6A2, SLC6A4, CD79B, CD79A, OPN1LW, SLCO2B1, NPBWR1, SLC18A1, SLC22A31, NTRK1, ABCA1, EPHA5, NGFR, KCNH7, AVPR2, GPR4, KCNK17, SSTR2, SLC7A5, SLC6A9, TRPV6, RHCG	353	820	15461	1.54898
GOTERM_CC_DIRECT	GO:0005912~adherens junction	4	0.947867	0.032852	EPHA5, SYNM, CXADR, RND1	353	31	15461	5.65147
GOTERM_CC_DIRECT	GO:0005882~intermediate filament	5	1.18483	0.0342581	SYNM, KRT3, KRT14, KRT35, SLC1A4	353	54	15461	4.05545
GOTERM_CC_DIRECT	GO:0016021~integral component of membrane	111	26.3033	0.0436632	KCNG1, CNTFR, FOLH1B, OGFOD3, LOC507550, LOC511657, ADGRA1, SLCO2B1, GJA8, SLC25A45, SLC12A9, LOC100140640, PAQR9, CXADR, BTN1A1, SLC30A1, KNCN, PROCR, IFI27, CLDN9, LOC618633, ABCG4, ABCG1, DPEP3, SMIM5, NPR1, OR52D1, LSMEM1, TMEM59L, SLC41A1, SLC1A4, LOC508420, GPR84, XKRX, OR2S2, NKAIN1, GJC2, ULBP15, NPBWR1, CD19, OTOF, LOC787932, RHBDL3, PROM2, B3GALNT2, KCNF1, FZD3, LOC100851523, MCAM, LOC5…	353	4185	15461	1.16169
GOTERM_CC_DIRECT	GO:0005737~cytoplasm	85	20.1422	0.0456625	BTG1, ADM, CHD4, ADARB1, RND1, RASSF1, MT2A, TRIM7, SLK, BASP1, RPS6KA2, SESN2, ARIH2, TK1, UPP1, PSPH, CEP68, CXADR, TBCCD1, SARS, TYK2, SSTR2, VRK3, SERPINB5, RUNX1, SLC7A5, MT1A, IRF4, HAND1, DDIT4, PADI3, TSSK3, GARS, HECA, LCP1, ARHGEF2, CARD14, PFN3, ATF4, PLIN5, SERPINB10, BEX2, CALCB, SHMT2, TUFT1, LSMEM1, CRABP1, OAZ3, NEUROD1, CD79B, CD79A, SCEL, DSN1, ASB10, CHN2, MKNK2, EIF4EBP1, LOC6…	353	3109	15461	1.19746
GOTERM_MF_DIRECT	GO:0017127~cholesterol transporter activity	5	1.18483	0.000106881	ABCA1, APOA2, APOE, ABCG4, ABCG1	295	12	13095	18.4958
GOTERM_MF_DIRECT	GO:0005179~hormone activity	5	1.18483	0.0388436	CALCB, IFNT3, ANGPTL8, ADM	295	57	13095	3.89384
GOTERM_MF_DIRECT	GO:0034041~sterol-transporting ATPase activity	2	0.473934	0.0444002	ABCG4, ABCG1	295	2	13095	44.3898
GOTERM_MF_DIRECT	GO:0005283~sodium:amino acid symporter activity	2	0.473934	0.0444002	SLC6A9	295	2	13095	44.3898
GOTERM_MF_DIRECT	GO:0000978~RNA polymerase II core promoter proximal region sequence-specific DNA binding	12	2.8436	0.0444129	NEUROD1, MYOG, NKX2-8, NR6A1, IRF4, CEBPG, HAND1, CHD4, GLI1, NKX3-2, JDP2, ATF4	295	273	13095	1.9512
Enrichment results of GO by genes with decreased expression 72h p.i. with strain ncp
Category	Term	Count	%	PValue	Genes	List Total	Pop Hits	Pop Total	Fold Enrichment
GOTERM_BP_DIRECT	GO:0006508~proteolysis	10	4.25532	0.0010126	DPP7, C1S, MME, PLAU, HGF, F11, RNPEP, CTSH, CAPN1, CFB	201	175	13824	3.93006
GOTERM_BP_DIRECT	GO:0006955~immune response	11	4.68085	0.00115977	IL21, CSF2, IRF8, ENPP1, CTSH, CXCL3, MAP3K14, THBS1, CXCL5, CTSS, BOLA-DOB	201	215	13824	3.51878
GOTERM_BP_DIRECT	GO:0061156~pulmonary artery morphogenesis	3	1.2766	0.00202376	JAG1, CITED2, STRA6	201	5	13824	41.2657
GOTERM_BP_DIRECT	GO:0034626~fatty acid elongation, polyunsaturated fatty acid	3	1.2766	0.00550647	ELOVL4, ELOVL5, ELOVL2	201	8	13824	25.791
GOTERM_BP_DIRECT	GO:0034625~fatty acid elongation, monounsaturated fatty acid	3	1.2766	0.00550647	ELOVL4, ELOVL5, ELOVL2	201	8	13824	25.791
GOTERM_BP_DIRECT	GO:0019367~fatty acid elongation, saturated fatty acid	3	1.2766	0.00550647	ELOVL4, ELOVL5, ELOVL2	201	8	13824	25.791
GOTERM_BP_DIRECT	GO:0006956~complement activation	3	1.2766	0.0070126	C3, C1S, C1R	201	9	13824	22.9254
GOTERM_BP_DIRECT	GO:0009813~flavonoid biosynthetic process	3	1.2766	0.012495	UGT2B10, UGT1A1, LOC781988	201	12	13824	17.194
GOTERM_BP_DIRECT	GO:0052696~flavonoid glucuronidation	3	1.2766	0.012495	UGT2B10, UGT1A1, LOC781988	201	12	13824	17.194
GOTERM_BP_DIRECT	GO:0001889~liver development	4	1.70213	0.0138954	MAN2A1, CITED2, HGF, HES1	201	35	13824	7.86013
GOTERM_BP_DIRECT	GO:0051603~proteolysis involved in cellular protein catabolic process	4	1.70213	0.0138954	CTSA, SCPEP1, CTSH, CTSS	201	35	13824	7.86013
GOTERM_BP_DIRECT	GO:0030148~sphingolipid biosynthetic process	3	1.2766	0.0146274	ELOVL4, ELOVL5, ELOVL2	201	13	13824	15.8714
GOTERM_BP_DIRECT	GO:0005975~carbohydrate metabolic process	6	2.55319	0.0156055	MANBA, GNPDA1, IDUA, HEXB, CHI3L1, HEXDC	201	101	13824	4.08571
GOTERM_BP_DIRECT	GO:0042761~very long-chain fatty acid biosynthetic process	3	1.2766	0.0169044	ELOVL4, ELOVL5, ELOVL2	201	14	13824	14.7377
GOTERM_BP_DIRECT	GO:0034614~cellular response to reactive oxygen species	3	1.2766	0.0193214	PDGFRA, PTPRK, FOS	201	15	13824	13.7552
GOTERM_BP_DIRECT	GO:0001503~ossification	4	1.70213	0.0212514	TWSG1, SLC26A2, AHSG, SPP1	201	41	13824	6.70987
GOTERM_BP_DIRECT	GO:0006958~complement activation, classical pathway	3	1.2766	0.0218739	C3, C1S, CD46	201	16	13824	12.8955
GOTERM_BP_DIRECT	GO:0061309~cardiac neural crest cell development involved in outflow tract morphogenesis	2	0.851064	0.0287269	JAG1, HES1	201	2	13824	68.7761
GOTERM_BP_DIRECT	GO:0072012~glomerulus vasculature development	2	0.851064	0.0287269	ANGPT1, HES1	201	2	13824	68.7761
GOTERM_BP_DIRECT	GO:0002764~immune response-regulating signaling pathway	2	0.851064	0.0287269	LAT2, CTSH	201	2	13824	68.7761
GOTERM_BP_DIRECT	GO:0060326~cell chemotaxis	4	1.70213	0.0303627	PDGFRA, HGF, CXCL3, CXCL5	201	47	13824	5.85329
GOTERM_BP_DIRECT	GO:0007179~transforming growth factor beta receptor signaling pathway	4	1.70213	0.0392862	CITED2, PTPRK, FOS, DUSP15	201	52	13824	5.29047
GOTERM_BP_DIRECT	GO:0021828~gonadotrophin-releasing hormone neuronal migration to the hypothalamus	2	0.851064	0.0427809	NRP1, SEMA3A	201	3	13824	45.8507
GOTERM_BP_DIRECT	GO:1903375~facioacoustic ganglion development	2	0.851064	0.0427809	NRP1, SEMA3A	201	3	13824	45.8507
GOTERM_BP_DIRECT	GO:0008152~metabolic process	5	2.12766	0.0444163	UGT2B10, UGT1A1, GSTA2, LOC615514, SGSH	201	92	13824	3.73783
GOTERM_CC_DIRECT	GO:0070062~extracellular exosome	66	28.0851	5.0004e-10	SLC44A4, UXS1, ITGB2, LAMC1, CPZ, SGSH, STK10, SCPEP1, ISLR, LAMP1, CA2, PLAU, RNPEP, CTSH, CAPN1, PDE8A, MME, AHSG, STX7, CTDSPL, EPDR1, ATP1B1, ITFG1, LAT2, TWSG1, SYPL1, PLSCR4, CHI3L1, TMEM106B, GINM1, ALDOB, CD46, PLA2R1, CDH16, SLC26A2, GRN, C1S, IDUA, CFI, LTBP3, GNS, THBS1, NID2, PBLD, C3, DPP7, MAN2A1, SPP1, STOM, IGFBP7, CD59, GC, HAO2, PRNP, RRM1, ANGPT1, FUCA1, F11, ATP2B2, CP, VASN, …	216	2162	15461	2.1851
GOTERM_CC_DIRECT	GO:0005615~extracellular space	34	14.4681	1.0071e-06	IL21, NRP1, CSF2, SEMA3A, CFI, CPZ, CXCL3, CLU, THBS1, CXCL5, CTSS, C3, PLAU, MAN2A1, RNPEP, SPP1, ENPP1, SOSTDC1, CTSH, LRIG3, CD59, IGFBP7, GC, EDN1, ANGPT1, HGF, F11, VASN, TWSG1, TCN1, PLBD1, CHI3L1, CD9, FBN1	216	950	15461	2.56176
GOTERM_CC_DIRECT	GO:0005764~lysosome	10	4.25532	0.000157621	CTSA, MANBA, FUCA1, GLMP, EPDR1, PLBD1, CTSH, CAPN1, GNS, CTSS	216	141	15461	5.0765
GOTERM_CC_DIRECT	GO:0072562~blood microparticle	7	2.97872	0.000611042	C3, C1S, AHSG, STOM, GC, CP, EIF2A	216	75	15461	6.68068
GOTERM_CC_DIRECT	GO:0009986~cell surface	14	5.95745	0.000786011	FZD1, PRNP, SCARA5, ITGB2, ABCA7, PTPRK, MSLN, VASN, SULF2, PLAU, ENPP1, CD59, PLA2R1, CD46	216	332	15461	3.01838
GOTERM_CC_DIRECT	GO:0005576~extracellular region	17	7.23404	0.00190708	ANGPT1, C1S, ADPGK, C1R, F11, PRSS35, CHSY1, SELENOP, PRRG1, RNPEP, SPP1, CHI3L1, CD59, IGFBP7, LOC525947, CFB, FBN1	216	505	15461	2.40958
GOTERM_CC_DIRECT	GO:0005765~lysosomal membrane	9	3.82979	0.00372538	LAMP1, STX7, ATP6V0A2, TMEM106B, GLMP, ENPP1, LITAF, CP, VASN	216	180	15461	3.57894
GOTERM_CC_DIRECT	GO:0005604~basement membrane	5	2.12766	0.00545277	ADAMTS1, LAMC1, RELL2, NID2, MATN2	216	51	15461	7.01752
GOTERM_CC_DIRECT	GO:0043231~intracellular membrane-bounded organelle	7	2.97872	0.00898749	UGT2B10, MANBA, GRN, ATP2B2, ABCA7, HSD17B11, LOC781988	216	128	15461	3.91446
GOTERM_CC_DIRECT	GO:0031012~extracellular matrix	6	2.55319	0.0229836	AHSG, MMP19, IGFBP7, LTBP3, CLU, THBS1	216	116	15461	3.70235
GOTERM_CC_DIRECT	GO:0005925~focal adhesion	10	4.25532	0.0344212	FZD1, NRP1, MME, PLAU, ATP6V0A2, CD9, CD59, CAPN1, CD46, ADD1	216	318	15461	2.2509
GOTERM_CC_DIRECT	GO:0005783~endoplasmic reticulum	13	5.53191	0.0454647	PRNP, ADPGK, ATP2B2, FOS, CLU, THBS1, SULF2, RCN2, RNF128, TMX1, CHI3L1, STOM, HS1BP3	216	497	15461	1.87228
GOTERM_MF_DIRECT	GO:0004252~serine-type endopeptidase activity	11	4.68085	8.0387e-05	MBTPS1, C1S, PLAU, C1R, HGF, F11, CFI, CTSH, MMP19, RHBDL2, CFB	193	152	13095	4.91018
GOTERM_MF_DIRECT	GO:0004185~serine-type carboxypeptidase activity	4	1.70213	0.000469485	CTSA, SCPEP1, DPP7, CPZ	193	11	13095	24.6726
GOTERM_MF_DIRECT	GO:0005509~calcium ion binding	20	8.51064	0.000732012	S100G, JAG1, C1S, FKBP14, C1R, EPDR1, LTBP3, LTBP1, NID2, THBS1, SULF2, EHD2, PPP3R1, RCN2, PRRG1, MMP19, CAPN1, CDH16, FBN1, MATN2	193	571	13095	2.37652
GOTERM_MF_DIRECT	GO:0015020~glucuronosyltransferase activity	4	1.70213	0.00215269	CSGALNACT1, UGT2B10, UGT1A1, LOC781988	193	18	13095	15.0777
GOTERM_MF_DIRECT	GO:0102336~3-oxo-arachidoyl-CoA synthase activity	3	1.2766	0.00565011	ELOVL4, ELOVL5, ELOVL2	193	8	13095	25.4437
GOTERM_MF_DIRECT	GO:0102338~3-oxo-lignoceronyl-CoA synthase activity	3	1.2766	0.00565011	ELOVL4, ELOVL5, ELOVL2	193	8	13095	25.4437
GOTERM_MF_DIRECT	GO:0102337~3-oxo-cerotoyl-CoA synthase activity	3	1.2766	0.00565011	ELOVL4, ELOVL5, ELOVL2	193	8	13095	25.4437
GOTERM_MF_DIRECT	GO:0009922~fatty acid elongase activity	3	1.2766	0.00565011	ELOVL4, ELOVL5, ELOVL2	193	8	13095	25.4437
GOTERM_MF_DIRECT	GO:0004857~enzyme inhibitor activity	3	1.2766	0.0149997	UGT1A1, TXNIP, LOC525947	193	13	13095	15.6576
GOTERM_MF_DIRECT	GO:0047238~glucuronosyl-N-acetylgalactosaminyl-proteoglycan 4-beta-N-acetylgalactosaminyltransferase activity	2	0.851064	0.0291103	CSGALNACT1, CHSY1	193	2	13095	67.8497
GOTERM_MF_DIRECT	GO:0051183~vitamin transporter activity	2	0.851064	0.0291103	GC, STRA6	193	2	13095	67.8497
GOTERM_MF_DIRECT	GO:0008449~N-acetylglucosamine-6-sulfatase activity	2	0.851064	0.0433477	GNS, SULF2	193	3	13095	45.2332
GOTERM_MF_DIRECT	GO:0005499~vitamin D binding	2	0.851064	0.0433477	S100G, GC	193	3	13095	45.2332
GOTERM_MF_DIRECT	GO:0030246~carbohydrate binding	5	2.12766	0.0462235	GALNT11, MAN2A1, GALNT18, CHI3L1, PLA2R1	193	92	13095	3.68749
