# Supplementary material for: Transcriptomic Analysis of MDBK Cells Infected with Cytopathic and Non-Cytopathic Strains of Bovine Viral Diarrhea Virus (BVDV)
Source: Viruses. 2022 Jun 11;14(6):1276. doi: 10.3390/v14061276 (PMC9228727; doi:10.3390/v14061276)
Supplement: Supplementary file 1 [file viruses-14-01276-s001.zip › Table S10_KEGG pathway enrichment result of the DEGs 24h p.i. with cp strain.xlsx]

## Sheet: Arkusz1
Enrichment of KEGG pathways by genes with increased expression 24h p.i. with strain cp
Category	Term	Count	%	PValue	Genes	List Total	Pop Hits	Pop Total	Fold Enrichment
KEGG_PATHWAY	bta04110:Cell cycle	58	3.40376	2.61688e-27	CDKN1A, MCM7, BUB1B, SMC3, CDC20, CDC23, CCND2, PTTG1, YWHAQ, CCND1, CHEK2, CHEK1, SKP2, YWHAG, CDC25C, CDC25A, CDC25B, RBL2, CCNA2, TFDP1, DBF4, RBL1, CCNE2, ESPL1, MCM4, MCM5, MCM6, TP53, HDAC2, PCNA, TTK, PKMYT1, CCNB2, FZR1, CCNB1, ORC6, CDC45, ORC1, RAD21, E2F1, BUB3, E2F4, BUB1, CDKN2D, ZBTB17, CDKN2C, GADD45A, PLK1, CDC6, GADD45G, MAD2L2, WEE1, CDK6, CDK2, CDK1, LOC780876, MAD2L1	689	125	7550	5.08447
KEGG_PATHWAY	bta03030:DNA replication	21	1.23239	2.15547e-12	RFC5, RNASEH2C, FEN1, PCNA, RFC4, LIG1, MCM7, RFC2, PRIM1, RPA2, POLD3, POLA1, POLA2, POLD1, RPA3, POLE2, MCM4, MCM5, DNA2, MCM6, POLE	689	36	7550	6.39211
KEGG_PATHWAY	bta00240:Pyrimidine metabolism	29	1.70188	2.34751e-08	CDA, DTYMK, PRIM1, TYMS, POLD3, NT5E, ZNRD1, POLD1, TK1, UPP1, POLE, POLR2K, ENTPD1, RRM2, ENTPD5, DCK, DHODH, POLA1, POLA2, POLR3C, NT5C1A, POLE2, POLR3E, CMPK1, POLR3G, CMPK2, UPRT, DCTPP1, POLR3K	689	98	7550	3.24265
KEGG_PATHWAY	bta04114:Oocyte meiosis	27	1.58451	8.20718e-06	CALM, SMC3, PKMYT1, AURKA, CDC20, CCNB2, PPP1CC, CCNB1, CDC23, SLK, PTTG1, YWHAQ, FBXO5, BUB1, YWHAG, PLK1, CDC25C, SGO1, MAD2L2, CCNE2, ESPL1, CDK2, CDK1, CALM3, LOC780876, MAD2L1	689	114	7550	2.59529
KEGG_PATHWAY	bta04115:p53 signaling pathway	20	1.17371	1.22614e-05	CDKN1A, RRM2, GADD45A, SERPINE1, GADD45G, DDB2, CCNB2, CCNB1, CDK6, CCND2, CCNE2, CCND1, CHEK2, SESN2, CHEK1, CDK2, CDK1, BID, TP53, GTSE1	689	71	7550	3.08674
KEGG_PATHWAY	bta03430:Mismatch repair	11	0.64554	1.41065e-05	RFC5, POLD3, RFC4, PCNA, MSH2, LIG1, EXO1, RFC2, POLD1, RPA3, RPA2	689	23	7550	5.24074
KEGG_PATHWAY	bta04068:FoxO signaling pathway	28	1.64319	4.48526e-05	CDKN1A, IRS1, SLC2A4, NLK, CCNB2, CCNB1, BCL2L11, CCND2, CCND1, PCK1, SKP2, PCK2, PLK4, CDKN2D, PLK3, PRMT1, GADD45A, BNIP3, PLK1, SOD2, GADD45G, RBL2, IL6, CDK2, KRAS, SGK3, SGK2	689	132	7550	2.32441
KEGG_PATHWAY	bta05166:HTLV-I infection	45	2.64085	6.77953e-05	CD40, CDKN1A, CSF2, PCNA, SLC2A1, BUB1B, ITGAL, TNF, RELB, MGC126945, POLD3, CDC20, CDC23, CCND2, PTTG1, CCND1, POLD1, CHEK2, CHEK1, MYB, E2F1, BUB3, MSX1, POLE, RANBP1, FZD3, CDKN2C, NFYB, RRAS2, NFATC1, NFKB1, NFKB2, FOSL1, NFKBIA, IL6, MRAS, POLE2, BOLA-DOA, KRAS, SLC25A5, TP53, LOC780876, MAD2L1, ATF4	689	267	7550	1.84684
KEGG_PATHWAY	bta03040:Spliceosome	27	1.58451	8.02456e-05	SNRPD1, TRA2B, MAGOH, SNRPD3, TXNL4A, BCAS2, HNRNPA3, ALYREF, THOC3, WBP11, MAGOHB, LSM5, CDC40, LSM3, LSM2, LSM7, LSM6, SYF2, PPIE, SRSF3, SNRPA1, PPIH, SNRPE, SNRPF, RBMX, SNRPA, SNRPB	689	129	7550	2.29352
KEGG_PATHWAY	bta03460:Fanconi anemia pathway	15	0.880282	0.000158884	RMI2, BLM, FANCM, RMI1, FANCL, FANCA, FAAP24, RPA2, BRCA1, PALB2, RAD51, FANCD2, UBE2T, RPA3, USP1	689	52	7550	3.16094
KEGG_PATHWAY	bta03440:Homologous recombination	11	0.64554	0.000205356	RAD52, POLD3, BLM, RAD51, MRE11, POLD1, RPA3, XRCC2, RAD54L, RPA2, RAD54B	689	30	7550	4.0179
KEGG_PATHWAY	bta05034:Alcoholism	36	2.11268	0.000470334	CALM, HDAC2, LOC530773, LOC524236, HIST2H2AB, HDAC8, HIST2H2AC, PPP1CC, LOC104975684, GNG2, GNG5, GNG4, HIST1H2AG, HIST3H2BB, HIST1H2AC, LOC614206, LOC504599, H2AFZ, LOC525433, HIST1H2AH, H2AFX, H2AFV, HIST2H2BF, LOC617043, ADORA2B, PKIA, HAT1, GNB1, LOC614970, CALM3, KRAS, LOC523702, HIST1H2BA, ATF4	689	215	7550	1.83481
KEGG_PATHWAY	bta03013:RNA transport	29	1.70188	0.000477184	NUP205, SEH1L, NXT1, GEMIN2, AAAS, NXT2, NUP160, POM121C, MAGOH, SUMO2, NUP62, XPO5, EIF4EBP1, NUP43, PAIP1, NDC1, EIF2B3, ALYREF, PYM1, THOC3, EIF2S2, MAGOHB, RANGAP1, NUP93, XPOT, TACC3, GEMIN5, NUP54, NUP37	689	159	7550	1.99861
KEGG_PATHWAY	bta03420:Nucleotide excision repair	13	0.762911	0.000510593	RFC5, PCNA, RFC4, LIG1, RFC2, RPA2, DDB2, POLD3, POLD1, RPA3, POLE2, MNAT1, POLE	689	45	7550	3.16562
KEGG_PATHWAY	bta05203:Viral carcinogenesis	38	2.23005	0.000582336	CDKN1A, HDAC2, LOC530773, SRC, HDAC8, RBPJ, MGC126945, CDC20, CCND2, CCND1, YWHAQ, CHEK1, HIST3H2BB, SKP2, YWHAG, LOC614206, RANBP1, LOC525433, TRAF1, HIST2H2BF, NFKB1, NFKB2, CCNA2, RBL2, NFKBIA, LOC617043, CDK6, RBL1, CCNE2, CDK2, RASA2, CDK1, KRAS, LOC523702, TP53, HIST1H2BA, ATF4	689	234	7550	1.77949
KEGG_PATHWAY	bta05202:Transcriptional misregulation in cancer	29	1.70188	0.00153993	CD40, CDKN1A, HDAC2, CSF2, FLT1, CXCL8, BCL2A1, DOT1L, HHEX, CCND2, PLAU, NTRK1, LOC504599, ZBTB17, CDKN2C, MMP3, PBX3, HMGA2, ETV1, TRAF1, ETV4, MMP9, ETV5, NFKB1, IL6, DDIT3, BMP2K, NUPR1, TP53	689	171	7550	1.85836
KEGG_PATHWAY	bta05206:MicroRNAs in cancer	38	2.23005	0.00173685	DNMT1, CDKN1A, TNXB, GLS2, IRS1, BRCA1, HOXD10, RASSF1, SOCS1, BCL2L11, CCND2, CCND1, PLAU, STMN1, E2F1, PLCG2, PIM1, TIMP3, FZD3, HMGA2, CDC25C, MMP9, NFKB1, CDC25A, VEGFA, CDC25B, MARCKS, ZEB1, CDK6, CCNE2, DDIT4, BCL2, SPRY2, KRAS, EZR, TP53, CD44, EZH2	689	248	7550	1.67903
KEGG_PATHWAY	bta03410:Base excision repair	10	0.586854	0.00214072	POLD3, NEIL3, FEN1, PCNA, LIG1, POLD1, POLE2, XRCC1, HMGB1, POLE	689	33	7550	3.32058
KEGG_PATHWAY	bta05219:Bladder cancer	11	0.64554	0.00251003	RASSF1, CDKN1A, CXCL8, CCND1, SRC, MMP1, E2F1, KRAS, TP53, MMP9, VEGFA	689	40	7550	3.01343
KEGG_PATHWAY	bta03018:RNA degradation	16	0.938967	0.00311833	HSPA9, BTG3, BTG1, LSM5, ENO2, LSM3, LSM2, EXOSC7, EXOSC5, LSM7, LSM6, EXOSC9, EXOSC8, EXOSC3, EXOSC2, MPHOSPH6	689	76	7550	2.30693
KEGG_PATHWAY	bta05161:Hepatitis B	25	1.46714	0.00368864	CDKN1A, PCNA, CXCL8, SRC, NFATC1, TICAM1, TNF, MMP9, NFKB1, DDB2, CCNA2, NFKBIA, IL6, CDK6, CCNE2, CCND1, YWHAQ, CDK2, E2F1, BCL2, BIRC5, KRAS, TP53, ATF4	689	148	7550	1.851
KEGG_PATHWAY	bta00670:One carbon pool by folate	7	0.410798	0.00399686	MTHFD1, MTHFD2, SHMT2, MTHFD2L, MTHFS, TYMS, ALDH1L2	689	18	7550	4.26141
KEGG_PATHWAY	bta05169:Epstein-Barr virus infection	21	1.23239	0.00463279	CD40, ENTPD1, HDAC2, CDKN1A, TNFAIP3, RBPJ, ITGAL, NFKB1, RELB, MGC126945, NFKB2, CCNA2, NFKBIA, CDK2, PLCG2, BCL2, NFKBIE, SKP2, TP53, CD44, NFKBIB	689	118	7550	1.95014
KEGG_PATHWAY	bta04621:NOD-like receptor signaling pathway	12	0.704225	0.0053534	NFKBIA, IL6, CXCL8, CCL5, IL18, TNFAIP3, MEFV, TNF, NFKB1, NAIP, BIRC3, NFKBIB	689	51	7550	2.57833
KEGG_PATHWAY	bta04914:Progesterone-mediated oocyte maturation	17	0.997653	0.00540244	PLK1, PKMYT1, CDC25C, CDC25A, CDC25B, CCNA2, MAD2L2, CCNB2, FZR1, CCNB1, CDC23, CDK2, CDK1, KRAS, LOC780876, BUB1, MAD2L1	689	88	7550	2.11687
KEGG_PATHWAY	bta05322:Systemic lupus erythematosus	28	1.64319	0.00553736	CD40, LOC530773, LOC524236, HIST2H2AB, TNF, HIST2H2AC, LOC104975684, SNRPD1, HIST1H2AG, HIST3H2BB, SNRPD3, HIST1H2AC, LOC614206, LOC504599, H2AFZ, LOC525433, HIST1H2AH, H2AFX, H2AFV, HIST2H2BF, LOC617043, BOLA-DOA, LOC614970, LOC523702, HIST1H2BA, SNRPB	689	178	7550	1.72372
KEGG_PATHWAY	bta04064:NF-kappa B signaling pathway	17	0.997653	0.00752341	CD40, CXCL8, BCL2A1, CSNK2A2, TNFAIP3, TRAF1, TICAM1, TNF, NFKB1, RELB, NFKB2, NFKBIA, PLAU, PLCG2, BCL2, PRKCQ, BIRC3	689	91	7550	2.04708
KEGG_PATHWAY	bta00230:Purine metabolism	27	1.58451	0.00903385	PRPS1, PRIM1, NPR2, GMPS, POLD3, NT5E, ZNRD1, POLD1, PDE4B, XDH, POLE, POLR2K, ADSL, ENTPD1, RRM2, ENTPD5, PAICS, DCK, POLA1, POLA2, POLR3C, NT5C1A, IMPDH2, POLE2, POLR3E, POLR3G, POLR3K	689	176	7550	1.68104
KEGG_PATHWAY	bta04151:PI3K-Akt signaling pathway	46	2.69953	0.00915745	CSF3, CDKN1A, FLT1, CHRM1, TNXB, IRS1, BRCA1, GNG2, BCL2L11, CCND2, GNG5, CCND1, YWHAQ, GNG4, MYB, SPP1, EIF4EBP1, PCK1, JAK2, YWHAG, FGF21, PCK2, F2R, VEGFC, NGF, NFKB1, VEGFA, RBL2, NR4A1, IL6, CDK6, CCNE2, IL7, DDIT4, GNB1, CDK2, BCL2, COL6A3, PKN2, KRAS, SGK3, TP53, SGK2, EPHA2, ATF4	689	347	7550	1.45263
KEGG_PATHWAY	bta05323:Rheumatoid arthritis	17	0.997653	0.0113375	CSF2, FLT1, CXCL8, CCL20, MMP1, MMP3, IL18, ITGAL, TNF, CXCL5, VEGFA, IL6, CCL5, BOLA-DOA, CCL3, ATP6V0A4, ATP6V1E2	689	95	7550	1.96089
KEGG_PATHWAY	bta04668:TNF signaling pathway	18	1.05634	0.0175913	CSF2, CCL20, MMP3, LIF, TNFAIP3, TRAF1, CXCL3, GRO1, TNF, MMP9, CX3CL1, NFKB1, NFKBIA, BAG4, IL6, CCL5, ATF4, BIRC3	689	108	7550	1.82632
KEGG_PATHWAY	bta00970:Aminoacyl-tRNA biosynthesis	10	0.586854	0.0183913	CARS, YARS, WARS, VARS, MARS, GATC, SARS, DARS2, GARS, AARS	689	45	7550	2.43509
KEGG_PATHWAY	bta04623:Cytosolic DNA-sensing pathway	12	0.704225	0.0204803	NFKBIA, IL6, POLR3C, CCL5, POLR3E, IL18, POLR3G, POLR3K, POLR2K, NFKB1, NFKBIB	689	61	7550	2.15565
KEGG_PATHWAY	bta01230:Biosynthesis of amino acids	13	0.762911	0.0256088	PRPS1, ARG2, SDS, SHMT2, GPT2, PYCR1, ENO2, RPIA, CTH, PHGDH, BCAT1, PSPH, IDH3A	689	71	7550	2.00638
KEGG_PATHWAY	bta04920:Adipocytokine signaling pathway	13	0.762911	0.0256088	IRS1, SLC2A1, ACSL4, SLC2A4, TNF, NFKB1, NFKBIA, PRKCQ, NFKBIE, PCK1, JAK2, NFKBIB, PCK2	689	71	7550	2.00638
KEGG_PATHWAY	bta04066:HIF-1 signaling pathway	16	0.938967	0.0263276	EGLN3, CDKN1A, FLT1, PFKFB3, SERPINE1, SLC2A1, ENO2, HK2, NFKB1, VEGFA, HK1, IL6, MKNK2, EIF4EBP1, PLCG2, BCL2	689	96	7550	1.82632
KEGG_PATHWAY	bta05134:Legionellosis	11	0.64554	0.0314811	NFKBIA, IL6, CXCL8, BNIP3, IL18, GRO1, CXCL3, TNF, NFKB1, NAIP, NFKB2	689	57	7550	2.11468
KEGG_PATHWAY	bta05200:Pathways in cancer	48	2.8169	0.0369684	CDKN1A, RALA, HDAC2, CXCL8, EPAS1, SLC2A1, CXCR4, GLI1, GLI3, CKS1B, RASSF1, GNG2, GNG5, CCND1, GNG4, E2F1, PLCG2, BID, SKP2, FGF21, NTRK1, EGLN3, FZD3, MMP1, PTCH2, F2R, VEGFC, TRAF1, MMP9, NFKB1, VEGFA, NFKB2, NFKBIA, BMP2, IL6, CDK6, RAD51, CCNE2, MSH2, GNAQ, GNB1, CDK2, BCL2, CKS2, BIRC5, KRAS, TP53, BIRC3	689	398	7550	1.32156
KEGG_PATHWAY	bta04964:Proximal tubule bicarbonate reclamation	6	0.352113	0.0442133	GLS2, CA4, ATP1B3, PCK1, AQP1, PCK2	689	22	7550	2.98852
Enrichment of KEGG pathways by genes with decreased expression 24h p.i. with strain cp
Category	Term	Count	%	PValue	Genes	List Total	Pop Hits	Pop Total	Fold Enrichment
KEGG_PATHWAY	bta04142:Lysosome	55	2.94275	2.29806e-24	HEXB, HEXA, CTSZ, CLTC, CTSV, TCIRG1, NAGPA, CTSS, SGSH, AP4M1, MFSD8, LAPTM4B, LAPTM4A, GNPTAB, LAMP1, SMPD1, LAMP2, CTSH, IDS, ACP2, CTSF, CTSD, CTSC, CTSB, ARSA, HGSNAT, ATP6V0B, GAA, SUMF1, NPC1, DNASE2, ATP6V0D1, ATP6V0C, ASAH1, IDUA, GBA, GNS, CLN3, NEU1, ATP6V0A2, ARSG, AGA, ATP6V0A1, CTSA, CD164, CTNS, NAGA, MCOLN1, AP4B1, IGF2R, GNPTG, GLB1, MAN2B1, TPP1, LGMN	687	126	7550	4.79714
KEGG_PATHWAY	bta01100:Metabolic pathways	203	10.8614	7.10304e-20	SEC1, ABAT, NADSYN1, GBA2, NDST2, C1GALT1C1, PNP, GLUL, ATP6V0E1, LOC508879, PHYKPL, ALG5, ACSL6, ALG2, ACSL5, ALG3, HOGA1, ALG1, UPB1, CYP27A1, CYP2U1, CYP2C87, IDNK, ATP6V0D1, PLPP3, ACOT4, PTGES, MTMR3, GNS, ABO, MTMR7, PGS1, UGCG, RDH10, ATP6V0A2, COX3, ST3GAL5, COX2, COX1, HAO2, ATP6V0A1, FDFT1, B3GALNT1, ST8SIA1, CYP4F2, MTHFR, ACADSB, EXT1, EXT2, SQLE, CYP26A1, LOC511498, CYP1A2, OGDH, CYP…	687	1235	7550	1.80642
KEGG_PATHWAY	bta04145:Phagosome	42	2.24719	3.07318e-10	ATP6V1A, RAB5C, ITGB5, ITGB3, ITGB2, NCF4, BOLA-DQA1, BOLA-DQA2, BLA-DQB, CTSV, TCIRG1, CTSS, THBS3, MRC2, TUBA1D, LOC512672, SEC61A1, LAMP1, LAMP2, MRC1, ATP6V0A2, BOLA-DRA, ATP6V0E2, RILP, ATP6V1D, ATP6V0A1, ATP6V0B, ATP6V0E1, LA-DQB, STX7, BOLA-DRB3, CANX, BOLA-DQB, CALR, PLA2R1, ATP6V0D1, FCGR2B, TLR4, ATP6V0C, LOC100848815, BOLA-DMB, ATP6V1B1	687	158	7550	2.92134
KEGG_PATHWAY	bta05323:Rheumatoid arthritis	26	1.39112	7.08255e-07	ATP6V1A, ITGB2, BOLA-DQA1, BOLA-DQA2, BLA-DQB, CTSV, TCIRG1, ATP6V0A2, BOLA-DRA, ATP6V0E2, ATP6V1D, ATP6V0A1, ATP6V0B, TGFB2, ATP6V0E1, LA-DQB, ANGPT1, TGFB3, BOLA-DRB3, BOLA-DQB, ATP6V0D1, TLR4, ATP6V0C, LOC100848815, BOLA-DMB, ATP6V1B1	687	95	7550	3.00774
KEGG_PATHWAY	bta00511:Other glycan degradation	11	0.58855	2.85908e-06	GLB1, HEXB, FUCA1, HEXA, NEU1, FUCA2, GBA, MAN2B1, AGA, GBA2, HEXDC	687	20	7550	6.0444
KEGG_PATHWAY	bta01130:Biosynthesis of antibiotics	40	2.14018	6.47692e-06	IDI1, ISYNA1, OAT, ACY1, AK2, MSMO1, HMGCR, AK7, AK8, TM7SF2, ALDH2, AMDHD2, FNTB, PGM3, PGM2, SC5D, ACADM, PRODH, HAO2, FDFT1, HMGCS1, ARG1, IDH1, CYP51A1, AMT, NME4, NME5, LSS, ASS1, ALDH3A2, SQLE, HKDC1, CAT, PCCB, OGDH, ACO1, IDNK, ACO2, FBP2, PCYOX1	687	206	7550	2.13394
KEGG_PATHWAY	bta04966:Collecting duct acid secretion	11	0.58855	7.23943e-05	ATP6V1A, ATP6V0E1, CA2, ATP6V0A2, TCIRG1, ATP6V0D1, ATP6V0E2, ATP6V0C, ATP6V1D, ATP6V0A1, ATP6V1B1	687	27	7550	4.47733
KEGG_PATHWAY	bta05152:Tuberculosis	34	1.81915	7.26294e-05	CAMK2B, RAB5C, ITGB2, BOLA-DQA1, BOLA-DQA2, BLA-DQB, TCIRG1, CTSS, MRC2, LAMP1, LAMP2, MRC1, ATP6V0A2, BOLA-DRA, LBP, CTSD, ATP6V0A1, ATP6V0B, TGFB2, LA-DQB, TGFB3, SPHK1, BOLA-DRB3, MAPK12, TNFRSF1A, MAPK11, BOLA-DQB, PLA2R1, ATP6V0D1, FCGR2B, TLR4, ATP6V0C, LOC100848815, BOLA-DMB	687	181	7550	2.06438
KEGG_PATHWAY	bta00600:Sphingolipid metabolism	15	0.802568	7.60292e-05	ARSA, CERS5, ASAH1, SPHK1, GBA, GBA2, SMPD3, UGCG, SMPD2, SPTLC1, GLB1, SMPD1, NEU1, KDSR, PLPP3	687	49	7550	3.36423
KEGG_PATHWAY	bta00630:Glyoxylate and dicarboxylate metabolism	10	0.535045	0.000303158	MCEE, PCCB, CAT, AMT, HYI, ACO1, ACO2, HOGA1, GLUL, HAO2	687	26	7550	4.22685
KEGG_PATHWAY	bta05321:Inflammatory bowel disease (IBD)	17	0.909577	0.000420132	IL21, TGFB2, IL4R, LA-DQB, TGFB3, STAT3, BOLA-DQA1, BOLA-DQA2, BLA-DQB, BOLA-DRB3, IL21R, STAT4, BOLA-DQB, BOLA-DRA, TLR4, LOC100848815, BOLA-DMB	687	70	7550	2.66895
KEGG_PATHWAY	bta05204:Chemical carcinogenesis	17	0.909577	0.000420132	UGT2B10, LOC508879, UGT1A1, CCBL1, MGST2, GSTT2, CYP2C18, SULT1A1, NAT1, GSTA3, CYP2C87, GSTA2, ALDH3B1, CYP1A2, LOC511498, CYP1A1	687	70	7550	2.66895
KEGG_PATHWAY	bta05140:Leishmaniasis	17	0.909577	0.000497678	TGFB2, LA-DQB, TGFB3, ITGB2, NCF4, BOLA-DQA1, BOLA-DQA2, BLA-DQB, BOLA-DRB3, MAPK12, MAPK11, BOLA-DQB, PTPN6, BOLA-DRA, TLR4, LOC100848815, BOLA-DMB	687	71	7550	2.63136
KEGG_PATHWAY	bta01212:Fatty acid metabolism	13	0.695559	0.000934684	ACADVL, HACD1, ELOVL5, ELOVL2, ACSL6, ACSL5, ELOVL6, HACD3, ACADSB, HACD4, ACOX3, ACADM, ACADS	687	48	7550	2.97641
KEGG_PATHWAY	bta04612:Antigen processing and presentation	17	0.909577	0.000942745	LA-DQB, BOLA-DQA1, BOLA-DQA2, BLA-DQB, BOLA-DRB3, CTSV, CTSS, LOC512672, CD8A, CANX, BOLA-DQB, BOLA-DRA, CALR, LOC100848815, BOLA-DMB, LGMN, CTSB	687	75	7550	2.49102
KEGG_PATHWAY	bta00830:Retinol metabolism	14	0.749064	0.00122656	UGT2B10, UGT1A1, CYP2C18, DHRS3, RPE65, CYP26A1, CYP2C87, RDH10, CYP1A2, LOC511498, CYP1A1, RDH5, PNPLA4, LRAT	687	56	7550	2.74745
KEGG_PATHWAY	bta04721:Synaptic vesicle cycle	15	0.802568	0.00127277	ATP6V1A, UNC13B, ATP6V0B, ATP6V0E1, CLTC, TCIRG1, ATP6V0A2, SLC17A6, ATP6V0D1, ATP6V0E2, ATP6V0C, ATP6V1D, STX1A, ATP6V1B1, ATP6V0A1	687	63	7550	2.61662
KEGG_PATHWAY	bta00100:Steroid biosynthesis	8	0.428036	0.00133831	SQLE, CYP51A1, SC5D, MSMO1, DHCR7, LSS, FDFT1, TM7SF2	687	20	7550	4.39592
KEGG_PATHWAY	bta00062:Fatty acid elongation	9	0.481541	0.00158359	HACD1, ELOVL4, ELOVL5, ELOVL2, ELOVL6, ELOVL7, HACD3, ACOT4, HACD4	687	26	7550	3.80417
KEGG_PATHWAY	bta00590:Arachidonic acid metabolism	16	0.856073	0.00173435	PLA2G2D1, LOC534967, GPX3, CYP4F2, DCXR, GPX7, LOC530929, CYP2C18, PLB1, CYP2U1, LOC521656, CYP2C87, TBXAS1, LOC511498, PTGES	687	72	7550	2.44218
KEGG_PATHWAY	bta04512:ECM-receptor interaction	18	0.963082	0.00184863	COL27A1, ITGB5, VWF, LAMB3, COL11A1, ITGB3, ITGA1, FN1, HSPG2, THBS3, COL4A2, COL4A1, COL5A3, DAG1, ITGA7, ITGB7, ITGB6, AGRN	687	87	7550	2.27375
KEGG_PATHWAY	bta05150:Staphylococcus aureus infection	14	0.749064	0.00203756	LA-DQB, CFI, PTAFR, ITGB2, BOLA-DQA1, BOLA-DQA2, BLA-DQB, BOLA-DRB3, C4A, BOLA-DQB, BOLA-DRA, FCGR2B, LOC100848815, BOLA-DMB	687	59	7550	2.60775
KEGG_PATHWAY	bta04146:Peroxisome	17	0.909577	0.0032598	IDH1, ECI2, ACSL6, ACSL5, PEX10, PEX2, DDO, PEX26, ACOX2, CAT, MPV17, ACOX3, DECR2, ABCD1, HAO2, PAOX, NUDT12	687	84	7550	2.22413
KEGG_PATHWAY	bta00531:Glycosaminoglycan degradation	8	0.428036	0.00332548	HGSNAT, GLB1, IDUA, HEXB, HEXA, IDS, GNS, SGSH	687	23	7550	3.82254
KEGG_PATHWAY	bta01040:Biosynthesis of unsaturated fatty acids	8	0.428036	0.00433332	HACD1, ELOVL5, ELOVL2, ELOVL6, ACOX3, HACD3, ACOT4, HACD4	687	24	7550	3.66327
KEGG_PATHWAY	bta04978:Mineral absorption	11	0.58855	0.00516248	SLC40A1, HMOX1, CYBRD1, ATP1A1, STEAP1, ATP1B1, LOC525947, CLCN2, STEAP2, HMOX2, FTL	687	44	7550	2.74745
KEGG_PATHWAY	bta05166:HTLV-I infection	38	2.03317	0.00589154	NRP1, WNT2B, ITGB2, BOLA-DQA1, PIK3CD, BOLA-DQA2, XIAP, BLA-DQB, ADCY7, CD3D, ADCY6, ETS2, ANAPC10, LOC512672, WNT6, WNT11, DVL1, BOLA-DRA, FZD1, PDGFRA, XBP1, TGFB2, MAP3K1, LA-DQB, TGFB3, IL1R1, FZD6, BOLA-DRB3, TGFBR1, TNFRSF1A, IL2RA, CANX, ANAPC4, BOLA-DQB, CALR, LTBR, LOC100848815, BOLA-DMB	687	267	7550	1.56409
KEGG_PATHWAY	bta00190:Oxidative phosphorylation	23	1.2306	0.00747232	ATP6V1A, ND6, ATP6V0B, ATP6V0E1, ATP8, ATP6, ND4L, TCIRG1, ATP6V0A2, COX3, COX2, COX1, ND1, CYTB, ATP6V0D1, ATP6V0E2, ND2, ATP6V0C, ATP6V1D, ND5, ATP6V1B1, ATP6V0A1, ND4	687	140	7550	1.80547
KEGG_PATHWAY	bta05416:Viral myocarditis	14	0.749064	0.00837744	LA-DQB, ITGB2, BOLA-DQA1, BOLA-DQA2, BLA-DQB, BOLA-DRB3, LOC512672, SGCB, DAG1, RAC3, BOLA-DQB, BOLA-DRA, LOC100848815, BOLA-DMB	687	69	7550	2.22982
KEGG_PATHWAY	bta04330:Notch signaling pathway	11	0.58855	0.00841119	RBPJL, LFNG, PSENEN, NCSTN, NUMBL, JAG1, DVL1, PSEN2, DTX3, PSEN1, DLL1	687	47	7550	2.57208
KEGG_PATHWAY	bta04672:Intestinal immune network for IgA production	12	0.642055	0.00943725	LA-DQB, BOLA-DQA1, BOLA-DQA2, BOLA-DQB, BLA-DQB, BOLA-DRB3, ITGB7, BOLA-DRA, LTBR, CCL28, LOC100848815, BOLA-DMB	687	55	7550	2.39778
KEGG_PATHWAY	bta00410:beta-Alanine metabolism	9	0.481541	0.0096158	ALDH3A2, LOC508879, ALDH2, ALDH3B1, DPYD, CARNS1, ABAT, ACADM, UPB1	687	34	7550	2.90907
KEGG_PATHWAY	bta04141:Protein processing in endoplasmic reticulum	26	1.39112	0.00981666	ERO1B, VCP, DNAJB2, ERLEC1, SEC61A1, HSPH1, OS9, LMAN2, FBXO6, SEC62, SIL1, SEC31A, SEC63, XBP1, SEC24A, FBXO2, EDEM2, SYVN1, MARCH6, PDIA6, CANX, ERP29, CALR, P4HB, CRYAB, NFE2L2	687	169	7550	1.69074
KEGG_PATHWAY	bta00071:Fatty acid degradation	10	0.535045	0.00989239	ALDH3A2, ACADVL, ALDH2, ECI2, ACSL6, ACSL5, ACOX3, ACADM, ACADS, ACADSB	687	41	7550	2.68044
KEGG_PATHWAY	bta00604:Glycosphingolipid biosynthesis - ganglio series	6	0.321027	0.0114122	GLB1, ST8SIA1, HEXB, HEXA, B3GALT4, ST3GAL5	687	16	7550	4.12118
KEGG_PATHWAY	bta05332:Graft-versus-host disease	10	0.535045	0.0116051	LOC512672, LA-DQB, BOLA-DQA1, BOLA-DQA2, BOLA-DQB, BLA-DQB, BOLA-DRB3, BOLA-DRA, LOC100848815, BOLA-DMB	687	42	7550	2.61662
KEGG_PATHWAY	bta00603:Glycosphingolipid biosynthesis - globo series	6	0.321027	0.0149835	B3GALNT1, ST8SIA1, HEXB, SEC1, HEXA, NAGA	687	17	7550	3.87876
KEGG_PATHWAY	bta00980:Metabolism of xenobiotics by cytochrome P450	12	0.642055	0.0158545	UGT2B10, LOC508879, UGT1A1, GSTA3, GSTA2, ALDH3B1, DCXR, CYP1A2, CYP1A1, GSTT2, MGST2	687	59	7550	2.23522
KEGG_PATHWAY	bta05310:Asthma	9	0.481541	0.0160614	LA-DQB, BOLA-DQA1, BOLA-DQA2, BOLA-DQB, BLA-DQB, BOLA-DRB3, BOLA-DRA, LOC100848815, BOLA-DMB	687	37	7550	2.6732
KEGG_PATHWAY	bta00760:Nicotinate and nicotinamide metabolism	8	0.428036	0.0223136	NT5C3B, PNP, NAPRT, ENPP1, ENPP3, NT5C2, NADSYN1, NUDT12	687	32	7550	2.74745
KEGG_PATHWAY	bta05145:Toxoplasmosis	18	0.963082	0.0257644	TGFB2, LA-DQB, LAMB3, TGFB3, STAT3, BOLA-DQA1, BOLA-DQA2, XIAP, BLA-DQB, BOLA-DRB3, MAPK12, TNFRSF1A, MAPK11, BOLA-DQB, BOLA-DRA, TLR4, LOC100848815, BOLA-DMB	687	113	7550	1.75059
KEGG_PATHWAY	bta00520:Amino sugar and nucleotide sugar metabolism	10	0.535045	0.0268342	CYB5R1, GNPDA1, HKDC1, HEXB, AMDHD2, FPGT, HEXA, PGM3, PGM2, RENBP	687	48	7550	2.28954
KEGG_PATHWAY	bta05205:Proteoglycans in cancer	28	1.49813	0.0276795	CAMK2B, WNT2B, ITGB5, ITGB3, SDC2, PIK3CD, CBLC, CTSV, FGF2, IGF1R, WNT6, WNT11, ERBB2, FZD1, TGFB2, HGF, FZD6, STAT3, IGF2, FN1, NUDT16L1, HSPG2, MAPK12, TIAM1, MAPK11, RPS6KB2, PTPN6, TLR4	687	203	7550	1.51584
KEGG_PATHWAY	bta05330:Allograft rejection	10	0.535045	0.0303241	LOC512672, LA-DQB, BOLA-DQA1, BOLA-DQA2, BOLA-DQB, BLA-DQB, BOLA-DRB3, BOLA-DRA, LOC100848815, BOLA-DMB	687	49	7550	2.24282
KEGG_PATHWAY	bta00280:Valine, leucine and isoleucine degradation	10	0.535045	0.0341185	ACAD8, ALDH3A2, MCEE, HMGCS1, ALDH2, PCCB, ABAT, ACADM, ACADS, ACADSB	687	50	7550	2.19796
KEGG_PATHWAY	bta00982:Drug metabolism - cytochrome P450	11	0.58855	0.0344595	UGT2B10, LOC508879, UGT1A1, GSTA3, GSTA2, ALDH3B1, CYP1A2, GSTT2, MGST2, FMO5	687	58	7550	2.08427
KEGG_PATHWAY	bta01200:Carbon metabolism	17	0.909577	0.0366035	IDH1, AMT, MTHFR, MCEE, TKFC, HKDC1, CAT, PCCB, OGDH, ACO1, IDNK, ME3, ACO2, ACADM, HAO2, ACADS, FBP2	687	109	7550	1.71401
KEGG_PATHWAY	bta04514:Cell adhesion molecules (CAMs)	22	1.1771	0.038205	CNTNAP2, LA-DQB, SDC2, ITGB2, BOLA-DQA1, BOLA-DQA2, BLA-DQB, BOLA-DRB3, F11R, CLDN2, PTPRF, LOC512672, CLDN4, CLDN3, CLDN15, CD8A, CLDN8, BOLA-DQB, ITGB7, BOLA-DRA, LOC100848815, BOLA-DMB	687	154	7550	1.56997
KEGG_PATHWAY	bta04940:Type I diabetes mellitus	10	0.535045	0.0426618	LOC512672, LA-DQB, BOLA-DQA1, BOLA-DQA2, BOLA-DQB, BLA-DQB, BOLA-DRB3, BOLA-DRA, LOC100848815, BOLA-DMB	687	52	7550	2.11343
KEGG_PATHWAY	bta04977:Vitamin digestion and absorption	6	0.321027	0.043742	CUBN, LMBRD1, TCN2, SLC52A3, LRAT, PLB1	687	22	7550	2.99722
KEGG_PATHWAY	bta05146:Amoebiasis	17	0.909577	0.0453952	TGFB2, COL27A1, RAB5C, LAMB3, TGFB3, ARG1, ACTN2, IL1R1, COL11A1, ITGB2, FN1, PIK3CD, PLCB4, COL4A2, COL4A1, COL5A3, TLR4	687	112	7550	1.6681
KEGG_PATHWAY	bta04918:Thyroid hormone synthesis	12	0.642055	0.0454641	PLCB4, CREB3L4, GPX3, CANX, GPX7, ATP1A1, TTF1, CGA, ATP1B1, ADCY7, ADCY6, SLC5A5	687	69	7550	1.91127
KEGG_PATHWAY	bta00591:Linoleic acid metabolism	8	0.428036	0.0460992	PLA2G2D1, LOC521656, CYP2C87, CYP1A2, LOC511498, LOC530929, CYP2C18, PLB1	687	37	7550	2.37618
KEGG_PATHWAY	bta05320:Autoimmune thyroid disease	11	0.58855	0.0466951	LOC512672, LA-DQB, BOLA-DQA1, BOLA-DQA2, BOLA-DQB, BLA-DQB, BOLA-DRB3, BOLA-DRA, CGA, LOC100848815, BOLA-DMB	687	61	7550	1.98177
KEGG_PATHWAY	bta00500:Starch and sucrose metabolism	7	0.374532	0.0496188	AMY2B, HKDC1, AGL, GAA, PGM2, ENPP1, ENPP3	687	30	7550	2.56429
