# Supplementary material for: Transcriptomic Analysis of MDBK Cells Infected with Cytopathic and Non-Cytopathic Strains of Bovine Viral Diarrhea Virus (BVDV)
Source: Viruses. 2022 Jun 11;14(6):1276. doi: 10.3390/v14061276 (PMC9228727; doi:10.3390/v14061276)
Supplement: Supplementary file 1 [file viruses-14-01276-s001.zip › Table S11_KEGG pathway enrichment result of the DEGs 72h p.i. with cp strain.xlsx]

## Sheet: Arkusz1
Enrichment of KEGG pathways by genes with increased expression 72h p.i. with strain cp
Category	Term	Count	%	PValue	Genes	List Total	Pop Hits	Pop Total	Fold Enrichment
KEGG_PATHWAY	bta04110:Cell cycle	35	2.18477	4.83027e-10	RB1, GSK3B, CDKN1A, BUB1B, TTK, CCNB2, FZR1, CCNB1, CDC45, CCND2, PTTG1, CCND1, CHEK1, E2F1, YWHAG, YWHAH, CDKN2D, ZBTB17, GADD45A, PLK1, CDC6, GADD45G, CCNA2, WEE1, CCNE2, ESPL1, CDK2, MDM2, CDK1, MCM4, MCM5, MCM6, LOC780876, MAD2L1	643	125	7550	3.28771
KEGG_PATHWAY	bta04151:PI3K-Akt signaling pathway	56	3.49563	3.41367e-06	GSK3B, CSF3, CDKN1A, FLT1, IRS1, ITGA2B, LAMC2, GYS1, CCND2, CREB3L3, CCND1, KDR, ITGAV, JAK2, YWHAG, YWHAH, MAP2K1, ITGA3, PPP2R5B, TSC1, NGF, CCNE2, COL6A2, COL6A1, DDIT4, ITGA7, COL6A3, ITGA6, SGK3, MET, EPHA2, ATF4, TNXB, HSP90B1, PPP2CB, GNG2, BCL2L11, GNG4, SPP1, EIF4EBP1, FGF21, PCK2, VEGFC, GNG12, VEGFA, NR4A1, IL6, EFNA3, IL7, CDK2, COL5A2, GNB1, MDM2, PKN2, KRAS	643	347	7550	1.89494
KEGG_PATHWAY	bta05200:Pathways in cancer	61	3.80774	6.34805e-06	RB1, GSK3B, CDKN1A, CXCL8, ITGA2B, SLC2A1, LAMC2, GLI1, CKS1B, RASSF1, CASP8, CCND1, CASP3, RASSF5, RAC2, ITGAV, APPL1, MAP2K1, ITGA3, MMP1, FLT3LG, MITF, TRAF1, FOS, MMP9, RUNX1, CCNE2, CKS2, BIRC5, ITGA6, MET, BIRC3, PTGER4, RALA, MAX, CXCR4, GNAI1, HSP90B1, GNG2, GNG4, E2F1, RUNX1T1, FGF21, STAT5B, EGLN3, FZD3, JUN, PTCH2, VEGFC, GNG12, NFKB2, VEGFA, NFKBIA, BMP2, IL6, GNAQ, CDK2, GNB1, MDM2, …	643	398	7550	1.79963
KEGG_PATHWAY	bta04668:TNF signaling pathway	25	1.56055	9.02989e-06	CSF2, CXCL3, GRO1, CX3CL1, SOCS3, BAG4, CASP7, CASP8, CREB3L3, CASP3, CCL5, MAP3K7, MAP2K3, MAP2K1, JUN, CCL20, TRAF1, FOS, TNFRSF1B, MMP9, NFKBIA, IL6, FAS, BIRC3, ATF4	643	108	7550	2.71802
KEGG_PATHWAY	bta04068:FoxO signaling pathway	28	1.74782	1.29882e-05	CDKN1A, IRS1, SLC2A4, NLK, CCNB2, CCNB1, BCL2L11, CCND2, CCND1, PCK2, CDKN2D, PLK3, MAP2K1, PRMT1, GADD45A, BNIP3, PLK2, PLK1, SOD2, FBXO32, GADD45G, IL6, BCL6, CDK2, MDM2, KRAS, SGK3	643	132	7550	2.49069
KEGG_PATHWAY	bta04115:p53 signaling pathway	19	1.18602	1.80112e-05	CDKN1A, RRM2, GADD45A, SERPINE1, GADD45G, CCNB2, CCNB1, CASP8, CCND2, CCNE2, CCND1, CASP3, SESN2, CHEK1, CDK2, CDK1, MDM2, FAS, GTSE1	643	71	7550	3.14218
KEGG_PATHWAY	bta04114:Oocyte meiosis	25	1.56055	2.36968e-05	MAP2K1, CAMK2A, PLK1, PPP2R5B, ITPR3, AURKA, SGO1, PPP3CA, CCNB2, PPP2CB, PPP3R1, CCNB1, SLK, PTTG1, CCNE2, ESPL1, CDK2, CDK1, FBXO5, CALM1, LOC780876, YWHAG, YWHAH, MAD2L1	643	114	7550	2.57496
KEGG_PATHWAY	bta04010:MAPK signaling pathway	42	2.62172	4.44211e-05	MAX, NLK, PPP3CA, PPP3R1, DUSP10, RRAS, CASP3, STMN1, RAC2, FLNC, MAP3K7, FGF21, CACNG5, MAP2K3, DUSP4, MAP2K1, JUN, JUND, DUSP1, GADD45A, HSPA6, PLA2G4A, RRAS2, NFATC1, FOS, NGF, GNG12, DUSP6, GADD45G, NFKB2, CACNB1, NR4A1, MRAS, MAPKAPK3, DDIT3, RASA2, FAS, MAPKAPK5, KRAS, MAP3K13, PTPN5, ATF4	643	255	7550	1.93395
KEGG_PATHWAY	bta01230:Biosynthesis of amino acids	18	1.1236	6.75059e-05	ARG2, SDS, SHMT2, GPT2, PYCR1, ENO2, RPIA, CS, CTH, ASL, PHGDH, ALDOC, BCAT1, PFKM, GAPDH, PFKP, PSPH, IDH3A	643	71	7550	2.9768
KEGG_PATHWAY	bta04152:AMPK signaling pathway	24	1.49813	0.000160083	CPT1A, PFKFB3, CAB39L, IRS1, STRADB, PPP2R5B, TSC1, SLC2A4, CPT1C, RAB10, CCNA2, PPP2CB, TBC1D1, GYS1, EEF2K, CREB3L3, CCND1, FASN, EIF4EBP1, MAP3K7, PFKM, PFKP, FBP2, PCK2	643	120	7550	2.34837
KEGG_PATHWAY	bta05202:Transcriptional misregulation in cancer	30	1.87266	0.000228388	CD40, CDKN1A, CSF2, FLT1, CXCL8, BCL2A1, KMT2A, MAX, DOT1L, PLAT, HHEX, CCND2, PLAU, GRIA3, RUNX1T1, ZBTB17, PBX3, HMGA2, ETV1, TRAF1, ETV4, MMP9, ETV5, RUNX1, IL6, BCL6, DDIT3, MDM2, BMP2K, MET	643	171	7550	2.05997
KEGG_PATHWAY	bta01130:Biosynthesis of antibiotics	34	2.12235	0.000262218	ACSS2, SHMT2, AK1, ODC1, AK6, ENO2, HK2, HK1, AK9, LDHB, DBT, ASL, PHGDH, AASS, PSPH, IDH3A, PCK2, BCKDHA, ARG2, SDS, TGDS, GFPT1, PYCR1, PGD, PAFAH2, RPIA, CS, CTH, ALDOC, BCAT1, GAPDH, PFKM, FBP2, PFKP	643	206	7550	1.93797
KEGG_PATHWAY	bta05166:HTLV-I infection	41	2.5593	0.000264039	RB1, GSK3B, CD40, CDKN1A, CSF2, SLC2A1, BUB1B, CD3G, ETS1, MGC126945, PPP3CA, POLD4, ZFP36, PPP3R1, CCND2, PTTG1, CCND1, RRAS, POLD1, CHEK1, E2F1, MSX1, STAT5B, FZD3, JUN, RRAS2, NFATC1, FOS, NFATC4, NFKB2, FOSL1, NFKBIA, IL6, MRAS, POLE2, KRAS, SLC25A31, LOC780876, MAD2L1, ATF4	643	267	7550	1.80305
KEGG_PATHWAY	bta05161:Hepatitis B	27	1.68539	0.000268776	RB1, CDKN1A, CXCL8, CASP8, CREB3L3, CCND1, CASP3, E2F1, PTK2B, STAT5B, MAP2K1, JUN, NFATC1, FOS, TICAM1, MMP9, NFATC4, CCNA2, NFKBIA, IL6, CCNE2, CDK2, BIRC5, FAS, KRAS, ATF4	643	148	7550	2.14209
KEGG_PATHWAY	bta05219:Bladder cancer	12	0.749064	0.000360979	RB1, RASSF1, MAP2K1, CDKN1A, CXCL8, CCND1, MMP1, E2F1, MDM2, KRAS, MMP9, VEGFA	643	40	7550	3.52255
KEGG_PATHWAY	bta04360:Axon guidance	23	1.43571	0.000759663	EPHA4, GSK3B, SEMA3C, SEMA4B, LIMK1, CXCR4, SEMA4G, SEMA3F, RHOD, GNAI1, RND1, NFATC4, PPP3CA, EFNA3, PPP3R1, RGS3, CFL2, RAC2, PAK6, KRAS, MET, EPHB3, EPHA2	643	125	7550	2.1605
KEGG_PATHWAY	bta04380:Osteoclast differentiation	24	1.49813	0.000834465	MAP2K1, JUN, JUND, NCF2, FHL2, TNFRSF11B, MITF, NFATC1, TYK2, FOS, FOSL2, NFKB2, FOSL1, NFKBIA, PPP3CA, SOCS3, CYLD, PPP3R1, IL6, SOCS1, TYROBP, TEC, FOSB, MAP3K7	643	134	7550	2.10302
KEGG_PATHWAY	bta04921:Oxytocin signaling pathway	25	1.56055	0.00110304	MAP2K1, CDKN1A, JUN, NPR2, CAMK2A, PLA2G4A, ITPR3, NFATC1, FOS, ACTB, MYLK3, GNAI1, NFATC4, ACTG1, CACNB1, PPP3CA, PPP3R1, RGS2, EEF2K, CCND1, GNAQ, KRAS, CALM1, CACNG5	643	145	7550	2.02445
KEGG_PATHWAY	bta00240:Pyrimidine metabolism	19	1.18602	0.0013514	CDA, DTYMK, DUT, RRM2, ENTPD4, ENTPD5, AK9, DHODH, NT5C3A, POLD4, NT5E, LOC534181, ZNRD1, POLR3C, POLD1, POLE2, CMPK1, TK1, UPP1	643	98	7550	2.27648
KEGG_PATHWAY	bta04510:Focal adhesion	32	1.9975	0.00138115	GSK3B, FLT1, TNXB, ITGA2B, ILK, LAMC2, ACTB, MYLK3, ACTG1, CCND2, CCND1, KDR, SPP1, RAC2, PAK6, ITGAV, FLNC, MAP2K1, JUN, ITGA3, CAV1, VEGFC, VEGFA, COL6A2, COL5A2, COL6A1, ZYX, ITGA7, COL6A3, ITGA6, MET, BIRC3	643	208	7550	1.80644
KEGG_PATHWAY	bta05134:Legionellosis	13	0.811486	0.00257725	CXCL8, BNIP3, HSPA6, IL18, CXCL3, GRO1, NFKB2, NFKBIA, CASP7, IL6, CASP8, CASP3, NAIP	643	57	7550	2.67796
KEGG_PATHWAY	bta04660:T cell receptor signaling pathway	19	1.18602	0.00300313	GSK3B, MAP2K1, JUN, CSF2, CD3G, NFATC1, FOS, NFKBIA, PPP3CA, PPP3R1, PTPRC, TEC, NCK2, PAK6, PRKCQ, KRAS, NFKBIE, MAP3K7, NFKBIB	643	105	7550	2.12471
KEGG_PATHWAY	bta00051:Fructose and mannose metabolism	9	0.561798	0.00354297	GMPPB, PFKFB3, AKR1B1, ALDOC, PFKM, HK2, FBP2, PFKP, HK1	643	31	7550	3.40892
KEGG_PATHWAY	bta04014:Ras signaling pathway	33	2.05993	0.00497658	RALA, FLT1, RASAL2, PLD1, ETS1, RASSF1, GNG2, RRAS, GNG4, RASSF5, KDR, RAC2, PAK6, ABL2, FGF21, MAP2K1, PLA2G12A, VEGFC, PLA2G4A, RRAS2, NGF, GNG12, VEGFA, PLA2G16, EFNA3, MRAS, GNB1, RASA2, KRAS, CALM1, MET, EPHA2, PLA1A	643	235	7550	1.64885
KEGG_PATHWAY	bta00565:Ether lipid metabolism	11	0.686642	0.00530313	PLA2G16, PLA2G12A, TMEM86B, LPCAT4, LPCAT2, AGPS, PLA2G4A, CHPT1, PLD1, PLD3, PAFAH2	643	47	7550	2.74809
KEGG_PATHWAY	bta05222:Small cell lung cancer	16	0.998752	0.00612131	RB1, MAX, ITGA3, ITGA2B, LAMC2, TRAF1, CKS1B, NFKBIA, CCNE2, CCND1, CDK2, E2F1, CKS2, ITGA6, ITGAV, BIRC3	643	87	7550	2.15942
KEGG_PATHWAY	bta04920:Adipocytokine signaling pathway	14	0.873908	0.0062085	CPT1A, IRS1, SLC2A1, ACSL4, SLC2A4, CPT1C, TNFRSF1B, NFKBIA, SOCS3, PRKCQ, NFKBIE, JAK2, NFKBIB, PCK2	643	71	7550	2.31529
KEGG_PATHWAY	bta05205:Proteoglycans in cancer	29	1.81024	0.00698025	CDKN1A, CAMK2A, TWIST1, ITPR3, ACTB, ACTG1, CCND1, ERBB3, RRAS, PLAU, CASP3, KDR, TIMP3, ITGAV, FLNC, MAP2K1, FZD3, CAV1, PLAUR, RRAS2, MMP9, VEGFA, MRAS, MDM2, FAS, KRAS, EZR, MET, CD44	643	203	7550	1.67741
KEGG_PATHWAY	bta04015:Rap1 signaling pathway	30	1.87266	0.00780258	DOCK4, RALA, FLT1, ITGA2B, ACTB, GNAI1, ACTG1, PARD6B, RRAS, RASSF5, KDR, RAC2, FGF21, MAP2K3, MAP2K1, PRKCI, MAGI3, VEGFC, NGF, VEGFA, EFNA3, MRAS, ADORA2B, GNAQ, PARD3, KRAS, CALM1, MET, RAPGEF3, EPHA2	643	214	7550	1.64605
KEGG_PATHWAY	bta04917:Prolactin signaling pathway	14	0.873908	0.00884104	STAT5B, GSK3B, MAP2K1, CISH, FOS, SOCS3, SOCS1, CCND2, CCND1, IRF1, KRAS, JAK2, SOCS7, SOCS5	643	74	7550	2.22143
KEGG_PATHWAY	bta04621:NOD-like receptor signaling pathway	11	0.686642	0.00962199	NFKBIA, IL6, CXCL8, CASP8, RIPK2, CCL5, IL18, MAP3K7, NAIP, BIRC3, NFKBIB	643	51	7550	2.53255
KEGG_PATHWAY	bta01200:Carbon metabolism	18	1.1236	0.0101506	SDS, ACSS2, SHMT2, GPT2, PGD, ENO2, HK2, HK1, RPIA, CS, PHGDH, ALDOC, PFKM, GAPDH, PFKP, FBP2, PSPH, IDH3A	643	109	7550	1.93902
KEGG_PATHWAY	bta05169:Epstein-Barr virus infection	19	1.18602	0.0104075	MAP2K3, RB1, CD40, JUN, CDKN1A, TYK2, RBPJ, MGC126945, NFKB2, CCNA2, NFKBIA, PSMD8, NEDD4, CDK2, MDM2, NFKBIE, MAP3K7, CD44, NFKBIB	643	118	7550	1.89063
KEGG_PATHWAY	bta05206:MicroRNAs in cancer	33	2.05993	0.0109199	CDKN1A, TNXB, ABCB1, GLS2, IRS1, RASSF1, SOCS1, BCL2L11, CCND2, CCND1, ERBB3, PLAU, CASP3, STMN1, E2F1, PIM1, TIMP3, MAP2K1, FZD3, ABCC1, HMGA2, MMP9, VEGFA, ZEB1, CCNE2, DDIT4, MDM2, SPRY2, KRAS, EZR, MET, CD44, EZH2	643	248	7550	1.56242
KEGG_PATHWAY	bta05323:Rheumatoid arthritis	16	0.998752	0.0136561	JUN, CSF2, FLT1, ATP6V1G2, CXCL8, CCL20, MMP1, IL18, FOS, CXCL5, VEGFA, IL6, IL23A, CCL5, ATP6V0A4, LTB	643	95	7550	1.97757
KEGG_PATHWAY	bta05230:Central carbon metabolism in cancer	12	0.749064	0.0143299	SLC7A5, MAP2K1, GLS2, SLC2A1, KRAS, SLC1A5, MET, PFKM, HK2, PFKP, HK1, PDK1	643	62	7550	2.27261
KEGG_PATHWAY	bta04066:HIF-1 signaling pathway	16	0.998752	0.0149607	MAP2K1, EGLN3, CDKN1A, FLT1, PFKFB3, CAMK2A, SERPINE1, SLC2A1, ENO2, HK2, VEGFA, HK1, IL6, EIF4EBP1, GAPDH, PDK1	643	96	7550	1.95697
KEGG_PATHWAY	bta00010:Glycolysis / Gluconeogenesis	12	0.749064	0.0160745	LDHB, ACSS2, GAPDHS, ALDOC, ENO2, PFKM, GAPDH, HK2, FBP2, PFKP, HK1, PCK2	643	63	7550	2.23654
KEGG_PATHWAY	bta05412:Arrhythmogenic right ventricular cardiomyopathy (ARVC)	12	0.749064	0.0200345	CACNB1, ITGA3, ITGA2B, LMNA, PKP2, ITGA7, ITGAV, ITGA6, ACTB, DSC2, ACTG1, CACNG5	643	65	7550	2.16772
KEGG_PATHWAY	bta05164:Influenza A	24	1.49813	0.0205221	MAP2K3, GSK3B, MAP2K1, JUN, NXT1, CXCL8, RSAD2, HSPA6, TMPRSS4, IL18, TYK2, TICAM1, ACTB, ACTG1, DNAJC3, NFKBIA, SOCS3, OAS1Y, IL6, CCL5, FAS, JAK2, NFKBIB	643	173	7550	1.62893
KEGG_PATHWAY	bta04910:Insulin signaling pathway	20	1.24844	0.0209254	GSK3B, MAP2K1, PRKCI, IRS1, TSC1, SLC2A4, HK2, HK1, SOCS3, GYS1, SOCS1, PPP1R3C, PRKAR1A, FASN, EIF4EBP1, KRAS, CALM1, RHOQ, FBP2, PCK2	643	136	7550	1.72674
KEGG_PATHWAY	bta05162:Measles	20	1.24844	0.0274888	STAT5B, GSK3B, CSNK2A2, HSPA6, CD3G, TYK2, NFKBIA, OAS1Y, IL6, CCND2, CCNE2, CCND1, CDK2, RAB9A, FAS, PRKCQ, JAK2, MAP3K7, NFKBIB	643	140	7550	1.67741
KEGG_PATHWAY	bta04022:cGMP-PKG signaling pathway	22	1.37328	0.0278039	MAP2K1, IRS1, NPR2, ATP1B3, ITPR3, NFATC1, ADRB2, ADRA2B, SLC8A1, MYLK3, GNAI1, NFATC4, PPP3CA, PPP3R1, RGS2, CREB3L3, GNAQ, KCNMA1, SLC25A31, CALM1, ATF4	643	159	7550	1.62466
KEGG_PATHWAY	bta05133:Pertussis	13	0.811486	0.0282906	JUN, CXCL8, FOS, TICAM1, CXCL5, GNAI1, CASP7, IL6, IL23A, CFL2, IRF1, CASP3, CALM1	643	77	7550	1.98239
KEGG_PATHWAY	bta05215:Prostate cancer	14	0.873908	0.0288858	RB1, GSK3B, MAP2K1, CDKN1A, HSP90B1, NFKBIA, CCNE2, CREB3L3, CCND1, CDK2, E2F1, MDM2, KRAS, ATF4	643	86	7550	1.91146
KEGG_PATHWAY	bta04012:ErbB signaling pathway	14	0.873908	0.0288858	STAT5B, GSK3B, MAP2K1, JUN, CDKN1A, CAMK2A, AREG, EREG, ERBB3, EIF4EBP1, NCK2, ABL2, PAK6, KRAS	643	86	7550	1.91146
KEGG_PATHWAY	bta04922:Glucagon signaling pathway	15	0.93633	0.0291435	CPT1A, PRMT1, CAMK2A, SLC2A1, ITPR3, CPT1C, PPP3CA, GYS1, LDHB, PPP3R1, CREB3L3, GNAQ, CALM1, PCK2, ATF4	643	95	7550	1.85397
KEGG_PATHWAY	bta04918:Thyroid hormone synthesis	12	0.749064	0.0300439	GPX1, CREB3L3, HSPA5, GNAQ, ITPR3, ATP1B3, TTF2, ASGR1, PDIA4, HSP90B1, ATF4, ASGR2	643	69	7550	2.04206
KEGG_PATHWAY	bta04390:Hippo signaling pathway	21	1.31086	0.0304486	TEAD4, GSK3B, FZD3, PRKCI, SERPINE1, AREG, ACTB, SAV1, ACTG1, MOB1B, PPP2CB, RASSF1, PARD6B, BMP2, CCND2, CCND1, PARD3, BIRC5, NF2, YWHAG, YWHAH	643	151	7550	1.63297
KEGG_PATHWAY	bta04512:ECM-receptor interaction	14	0.873908	0.03143	TNXB, ITGA3, ITGA2B, LAMC2, SV2A, COL6A2, COL5A2, COL6A1, SPP1, COL6A3, ITGA7, ITGA6, ITGAV, CD44	643	87	7550	1.88949
KEGG_PATHWAY	bta03320:PPAR signaling pathway	12	0.749064	0.0330222	FADS2, CPT1A, GK, ACADL, MMP1, ILK, OLR1, ACSL4, ANGPTL4, CPT1C, GK2, PCK2	643	70	7550	2.01289
KEGG_PATHWAY	bta04662:B cell receptor signaling pathway	12	0.749064	0.0330222	NFKBIA, PPP3CA, GSK3B, PPP3R1, MAP2K1, JUN, RAC2, KRAS, NFATC1, FOS, NFKBIE, NFKBIB	643	70	7550	2.01289
KEGG_PATHWAY	bta00564:Glycerophospholipid metabolism	15	0.93633	0.0341297	ACHE, PLA2G12A, DGKD, MBOAT1, PLA2G4A, PLD1, PLD3, PLA2G16, LPCAT4, ETNK1, GPD2, LPCAT2, CHPT1, GPAT3, GPD1L	643	97	7550	1.81575
KEGG_PATHWAY	bta04062:Chemokine signaling pathway	24	1.49813	0.0407798	STAT5B, GSK3B, MAP2K1, CXCL8, CCL20, CXCR4, GNG12, CXCL3, GRO1, CXCL5, CX3CL1, GNAI1, NFKBIA, GNG2, GNG4, CCL5, PARD3, GNB1, RAC2, PTK2B, KRAS, JAK2, CCL17, NFKBIB	643	185	7550	1.52327
KEGG_PATHWAY	bta04728:Dopaminergic synapse	18	1.1236	0.0426823	GSK3B, CAMK2A, PPP2R5B, ITPR3, FOS, GNG12, GNAI1, PPP3CA, PPP2CB, GNG2, CREB3L3, GNG4, GNAQ, KIF5B, GNB1, CALM1, GRIA3, ATF4	643	128	7550	1.6512
KEGG_PATHWAY	bta04725:Cholinergic synapse	16	0.998752	0.0449682	ACHE, MAP2K1, CHRNA7, CAMK2A, ITPR3, FOS, GNG12, GNAI1, GNG2, CREB3L3, GNG4, GNAQ, GNB1, KRAS, JAK2, ATF4	643	110	7550	1.7079
KEGG_PATHWAY	bta05132:Salmonella infection	13	0.811486	0.0470277	JUN, CSF2, CXCL8, IL18, FOS, CXCL3, GRO1, ACTB, ACTG1, IL6, PKN2, FLNC, RAB7B	643	83	7550	1.83908
KEGG_PATHWAY	bta04931:Insulin resistance	16	0.998752	0.0481029	GSK3B, CPT1A, IRS1, GFPT1, SLC2A1, SLC2A4, NFKBIA, SOCS3, GYS1, IL6, PPP1R3C, CREB3L3, TRIB3, PRKCQ, OGT, PCK2	643	111	7550	1.69252
Enrichment of KEGG pathways by genes with decreased expression 72h p.i. with strain ncp
Category	Term	Count	%	PValue	Genes	List Total	Pop Hits	Pop Total	Fold Enrichment
KEGG_PATHWAY	bta01100:Metabolic pathways	165	11.4266	4.29676e-18	GALNT12, GALNT11, GALNT18, MSMO1, OGDHL, COMT, PLB1, TM7SF2, CNDP2, NDST1, C1GALT1C1, NSDHL, PNP, FPGT, CKMT1B, ENPP1, GLUL, CSGALNACT1, PDHX, ATP6V1G1, LOC508879, GLCE, OXSM, ACSL6, ACSL5, CMBL, ALG1, SDHD, HOGA1, SDHA, UPB1, ALDH3A2, DCTD, CYP27A1, PHOSPHO2, CYP2U1, CYP2C87, HMBS, ND1, IDNK, ATP6V0D1, PLPP3, ND2, ND5, ACOT4, ND4, ND6, IDI1, MTMR3, ATP8, COX15, ATP6, AK2, CYP2C18, ACAT2, FUT4, M…	535	1235	7550	1.88543
KEGG_PATHWAY	bta04142:Lysosome	32	2.21607	4.50287e-10	HEXB, HEXA, CTSV, LIPA, CTSS, SGSH, MFSD8, CLN3, LAPTM4A, LAMP1, SMPD1, NEU1, ATP6V0A2, CTSH, ARSG, AGA, CTSD, ARSB, CTSC, AP1M1, CTSA, ARSA, MANBA, GAA, CTNS, NAGA, MCOLN1, IGF2R, SUMF1, TPP1, ATP6V0D1, LGMN	535	126	7550	3.58404
KEGG_PATHWAY	bta01130:Biosynthesis of antibiotics	35	2.42382	2.43206e-06	IDI1, OAT, ACY1, AK2, OGDHL, MSMO1, PDHB, ACAT2, TM7SF2, NSDHL, ALDH2, FNTB, SC5D, HMGCS1, IDH1, SDHD, NME5, CMBL, SDHA, LSS, NME1, HADHB, ALDH3A2, SQLE, NME7, HKDC1, CAT, PCCB, OGDH, ACO1, IDNK, ACO2, ALDOB, DLD, PCYOX1	535	206	7550	2.3977
KEGG_PATHWAY	bta00100:Steroid biosynthesis	10	0.692521	3.43554e-06	SQLE, EBP, NSDHL, SC5D, MSMO1, DHCR24, DHCR7, LIPA, LSS, TM7SF2	535	20	7550	7.05607
KEGG_PATHWAY	bta00190:Oxidative phosphorylation	24	1.66205	0.000112613	ND6, NDUFA7, ATP6V1G1, COX15, ATP8, ATP6, ND4L, SDHD, SDHA, NDUFS8, NDUFS5, ATP6V0A2, COX3, COX2, COX1, ND1, CYTB, ATP6V0D1, NDUFV2, ND2, ATP6V1D, ND5, ATP6V1C2, ND4	535	140	7550	2.41923
KEGG_PATHWAY	bta05204:Chemical carcinogenesis	15	1.03878	0.000318323	LOC508879, UGT1A1, MGST2, GSTT2, GSTT1, CYP2C18, SULT1A1, NAT1, GSTA3, CYP2C87, GSTA2, CYP1A2, CYP1A1, UGT2A1	535	70	7550	3.02403
KEGG_PATHWAY	bta00020:Citrate cycle (TCA cycle)	9	0.623269	0.000863983	IDH1, OGDH, ACO1, OGDHL, PDHB, ACO2, SDHD, SDHA, DLD	535	30	7550	4.23364
KEGG_PATHWAY	bta00630:Glyoxylate and dicarboxylate metabolism	8	0.554017	0.00171226	PCCB, CAT, ACO1, ACO2, HOGA1, GLUL, DLD, ACAT2	535	26	7550	4.3422
KEGG_PATHWAY	bta00511:Other glycan degradation	7	0.484765	0.00200287	MANBA, HEXB, HEXA, NEU1, FUCA2, AGA, HEXDC	535	20	7550	4.93925
KEGG_PATHWAY	bta00980:Metabolism of xenobiotics by cytochrome P450	12	0.831025	0.0024849	LOC508879, UGT1A1, GSTA3, GSTA2, CYP1A2, CYP1A1, LOC788425, GSTT2, MGST2, GSTT1, UGT2A1	535	59	7550	2.87027
KEGG_PATHWAY	bta00860:Porphyrin and chlorophyll metabolism	9	0.623269	0.00306706	ALAS1, UGT1A1, COX15, MMAB, HMBS, HMOX1, UGT2A1, CP, FXN	535	36	7550	3.52804
KEGG_PATHWAY	bta04978:Mineral absorption	10	0.692521	0.00314121	S100G, SLC40A1, HMOX1, CYBRD1, TRPM7, STEAP1, ATP1B1, LOC525947, CLCN2, FTL	535	44	7550	3.20731
KEGG_PATHWAY	bta00830:Retinol metabolism	11	0.761773	0.00531681	CYP26A1, UGT1A1, CYP2C87, RDH10, CYP1A2, CYP1A1, PNPLA4, RDH5, UGT2A1, CYP2C18, DHRS3	535	56	7550	2.77203
KEGG_PATHWAY	bta00512:Mucin type O-Glycan biosynthesis	8	0.554017	0.00605381	GALNT7, GALNT12, GALNT11, C1GALT1C1, GALNT18, C1GALT1, GALNTL5, GCNT3	535	32	7550	3.52804
KEGG_PATHWAY	bta00760:Nicotinate and nicotinamide metabolism	8	0.554017	0.00605381	PNP, NMNAT1, NAPRT, ENPP1, CD38, NMNAT2, NT5C2, NUDT12	535	32	7550	3.52804
KEGG_PATHWAY	bta05322:Systemic lupus erythematosus	23	1.5928	0.00706907	LOC614206, HIST1H2BN, H2AFY, C1S, LOC525433, HIST1H2AH, C1R, LOC524236, H4, HIST2H2BF, C3, GRIN2A, LOC617043, H2B, LOC523702, LOC617875, HIST1H2BB, HIST1H2AC, HIST1H2BD	535	178	7550	1.82348
KEGG_PATHWAY	bta04145:Phagosome	21	1.45429	0.00769731	RAB5B, ATP6V1G1, RAB5C, C1R, ITGB2, NCF4, CTSV, FCAR, CTSS, C3, TUBA1D, LAMP1, TUBB3, ATP6V0A2, CD14, ATP6V0D1, PLA2R1, SEC22B, TLR4, ATP6V1D, ATP6V1C2	535	158	7550	1.87567
KEGG_PATHWAY	bta05152:Tuberculosis	23	1.5928	0.00857066	RAB5B, TGFB2, RAB5C, KSR1, TGFB3, NFYC, ITGB2, LSP1, BCL10, MAPK12, CTSS, C3, MAPK10, MAPK9, LAMP1, ATP6V0A2, LBP, CD14, ATP6V0D1, PLA2R1, TLR4, CTSD, MYD88	535	181	7550	1.79326
KEGG_PATHWAY	bta01200:Carbon metabolism	16	1.10803	0.00944564	IDH1, OGDHL, PDHB, SDHD, SDHA, ACAT2, HKDC1, CAT, PCCB, OGDH, ACO1, IDNK, ME3, ACO2, ALDOB, DLD	535	109	7550	2.07151
KEGG_PATHWAY	bta00380:Tryptophan metabolism	9	0.623269	0.0142089	ALDH3A2, DDC, ALDH2, CYP1A2, CAT, CYP1A1, OGDH, OGDHL, ACAT2	535	46	7550	2.76107
KEGG_PATHWAY	bta04977:Vitamin digestion and absorption	6	0.415512	0.0167085	CUBN, LMBRD1, GIF, SLC52A3, APOA1, PLB1	535	22	7550	3.84877
KEGG_PATHWAY	bta00900:Terpenoid backbone biosynthesis	6	0.415512	0.0167085	IDI1, HMGCS1, FNTB, PDSS2, ACAT2, PCYOX1	535	22	7550	3.84877
KEGG_PATHWAY	bta05034:Alcoholism	25	1.7313	0.0169139	LOC614206, HIST1H2BN, NTRK2, DDC, H2AFY, HDAC1, LOC525433, HIST1H2AH, LOC524236, H4, GNG11, HIST2H2BF, LOC617043, GRIN2A, H2B, GNB5, LOC617875, LOC523702, HIST1H2BB, HIST1H2AC, HIST1H2BD	535	215	7550	1.64095
KEGG_PATHWAY	bta01212:Fatty acid metabolism	9	0.623269	0.0181629	HADHB, ELOVL5, ELOVL2, OXSM, ACSL6, ACSL5, ELOVL6, ACADSB, ACAT2	535	48	7550	2.64603
KEGG_PATHWAY	bta05133:Pertussis	12	0.831025	0.0188296	C3, MAPK10, MAPK9, C1S, C1R, ITGB2, IRF8, NOD1, CD14, TLR4, MYD88, MAPK12	535	77	7550	2.1993
KEGG_PATHWAY	bta00982:Drug metabolism - cytochrome P450	10	0.692521	0.0196152	LOC508879, UGT1A1, GSTA3, GSTA2, CYP1A2, GSTT2, MGST2, GSTT1, UGT2A1	535	58	7550	2.43313
KEGG_PATHWAY	bta00604:Glycosphingolipid biosynthesis - ganglio series	5	0.34626	0.0227383	ST8SIA1, HEXB, HEXA, B3GALT4, ST3GAL5	535	16	7550	4.41005
KEGG_PATHWAY	bta00330:Arginine and proline metabolism	9	0.623269	0.0228487	ALDH3A2, ALDH4A1, GATM, OAT, ALDH2, CARNS1, CKMT1B, HOGA1, CNDP2	535	50	7550	2.54019
KEGG_PATHWAY	bta00071:Fatty acid degradation	8	0.554017	0.023354	HADHB, ALDH3A2, ALDH2, ECI2, ACSL6, ACSL5, ACADSB, ACAT2	535	41	7550	2.75359
KEGG_PATHWAY	bta00603:Glycosphingolipid biosynthesis - globo series	5	0.34626	0.0281151	B3GALNT1, ST8SIA1, HEXB, HEXA, NAGA	535	17	7550	4.15063
KEGG_PATHWAY	bta00062:Fatty acid elongation	6	0.415512	0.033087	HADHB, ELOVL4, ELOVL5, ELOVL2, ELOVL6, ACOT4	535	26	7550	3.25665
KEGG_PATHWAY	bta04610:Complement and coagulation cascades	11	0.761773	0.0345386	C3, FGB, FGA, F8, C1S, C1R, CFI, A2M, F2, KNG1, F5	535	74	7550	2.09775
KEGG_PATHWAY	bta04966:Collecting duct acid secretion	6	0.415512	0.0383289	ATP6V1G1, CA2, ATP6V0A2, ATP6V0D1, ATP6V1D, ATP6V1C2	535	27	7550	3.13603
KEGG_PATHWAY	bta05012:Parkinson's disease	18	1.24654	0.0395452	ND6, NDUFA7, ATP8, ATP6, ND4L, SDHD, SDHA, NDUFS8, NDUFS5, COX3, COX2, COX1, ND1, CYTB, NDUFV2, ND2, ND5, ND4	535	152	7550	1.67118
KEGG_PATHWAY	bta00140:Steroid hormone biosynthesis	9	0.623269	0.0458238	UGT1A1, CYP2C87, HSD3B1, CYP1A2, CYP1A1, UGT2A1, COMT, CYP2C18	535	57	7550	2.22823
KEGG_PATHWAY	bta05010:Alzheimer's disease	20	1.38504	0.0462368	NDUFA7, MME, ATP8, ATP6, PSEN2, SDHD, PSEN1, SDHA, BACE2, GRIN2A, NCSTN, NDUFS8, NDUFS5, COX3, COX2, COX1, CYTB, NAE1, CAPN1, NDUFV2	535	178	7550	1.58563
