# Supplementary material for: Transcriptomic Analysis of MDBK Cells Infected with Cytopathic and Non-Cytopathic Strains of Bovine Viral Diarrhea Virus (BVDV)
Source: Viruses. 2022 Jun 11;14(6):1276. doi: 10.3390/v14061276 (PMC9228727; doi:10.3390/v14061276)
Supplement: Supplementary file 1 [file viruses-14-01276-s001.zip › Table S12_KEGG pathway enrichment result of the DEGs 24h p.i. with ncp strains.xlsx]

## Sheet: Arkusz1
Enrichment of KEGG pathways by genes with increased expression 24h p.i. with strain ncp
Category	Term	Count	%	PValue	Genes	List Total	Pop Hits	Pop Total	Fold Enrichment
KEGG_PATHWAY	bta04080:Neuroactive ligand-receptor interaction	24	4.9896	2.66973e-06	GABRQ, GABRB2, GABRB1, CHRNA4, HTR2B, LPAR2, GPR50, PTH1R, SSTR2, HTR4, ADRA2B, ADRA1A, TSHR, CRHR2, HTR6, ADRB3, CCKBR, LTB4R2, P2RY4, GALR2, NPBWR1, S1PR2, DRD2, DRD5	202	292	7550	3.07202
KEGG_PATHWAY	bta04024:cAMP signaling pathway	13	2.7027	0.00645911	ATP1A4, BRAF, SSTR2, HTR4, VAV1, TSHR, NFKBIA, HTR6, NPY, CNGA4, DRD2, DRD5, CREB5	202	198	7550	2.454
KEGG_PATHWAY	bta05219:Bladder cancer	5	1.0395	0.0210893	CXCL8, CCND1, SRC, BRAF, UPK3A	202	40	7550	4.67203
KEGG_PATHWAY	bta00260:Glycine, serine and threonine metabolism	5	1.0395	0.0228962	PSAT1, GLDC, CTH, PHGDH, PSPH	202	41	7550	4.55808
KEGG_PATHWAY	bta04726:Serotonergic synapse	8	1.6632	0.0348127	GABRB2, HTR6, GABRB1, HTR2B, BRAF, HTR4, SLC18A1, SLC6A4	202	116	7550	2.57767
KEGG_PATHWAY	bta04740:Olfactory transduction	38	7.90021	0.0490226	LOC788079, LOC787385, LOC508687, OR52D1, LOC509633, LOC511657, LOC508980, LOC508420, LOC510625, OR2S2, LOC783998, OR52W1, LOC615150, LOC785899, LOC617592, OR2AG2, LOC532486, OR4D9, LOC788703, OR52B2, CNGA4, OR7D2, LOC101904911, LOC788323, LOC527415, LOC532403, LOC523753, LOC784681, LOC783205, OR2V2, LOC784897, OR2L13, LOC524658, OR8G5, OR2A5, OR10A3	202	1062	7550	1.33738
Enrichment of KEGG pathways by genes with decreased expression 24h p.i. with strain ncp
Category	Term	Count	%	PValue	Genes	List Total	Pop Hits	Pop Total	Fold Enrichment
KEGG_PATHWAY	bta00190:Oxidative phosphorylation	7	3.93258	0.00113184	ND6, ATP6V0A2, COX1, ND4L, ND2, ND5, ATP6V1C2	65	140	7550	5.80769
KEGG_PATHWAY	bta05323:Rheumatoid arthritis	5	2.80899	0.00840367	IL11, ATP6V0A2, IL18, FOS, ATP6V1C2	65	95	7550	6.11336
KEGG_PATHWAY	bta05012:Parkinson's disease	5	2.80899	0.0395383	ND6, COX1, ND4L, ND2, ND5	65	152	7550	3.82085
KEGG_PATHWAY	bta04145:Phagosome	5	2.80899	0.0445448	STX7, ATP6V0A2, PLA2R1, ATP6V1C2, THBS3	65	158	7550	3.67575
KEGG_PATHWAY	bta01100:Metabolic pathways	17	9.55056	0.0493454	ND6, RRM1, PLA2G4F, IDH1, AMT, PDXP, ND4L, AK7, GATM, ATP6V0A2, ST8SIA5, TK2, COX1, ME3, ND2, ND5, ATP6V1C2	65	1235	7550	1.59888
