# Supplementary material for: Transcriptomic Analysis of MDBK Cells Infected with Cytopathic and Non-Cytopathic Strains of Bovine Viral Diarrhea Virus (BVDV)
Source: Viruses. 2022 Jun 11;14(6):1276. doi: 10.3390/v14061276 (PMC9228727; doi:10.3390/v14061276)
Supplement: Supplementary file 1 [file viruses-14-01276-s001.zip › Table S13_KEGG pathway enrichment result of the DEGs 72h p.i. with ncp strains.xlsx]

## Sheet: Arkusz1
Enrichment of KEGG pathways by genes with increased expression 72h p.i. with strain ncp
Category	Term	Count	%	PValue	Genes	List Total	Pop Hits	Pop Total	Fold Enrichment
KEGG_PATHWAY	bta00260:Glycine, serine and threonine metabolism	6	1.4218	0.00158001	SHMT2, PSAT1, GLDC, CTH, PHGDH, PSPH	160	41	7550	6.90549
KEGG_PATHWAY	bta01230:Biosynthesis of amino acids	7	1.65877	0.00367799	ARG2, SHMT2, PSAT1, CTH, PYCR1, PHGDH, PSPH	160	71	7550	4.65229
KEGG_PATHWAY	bta04978:Mineral absorption	5	1.18483	0.0133681	MT2A, MT1A, TRPV6, SLC30A1, MT1E	160	44	7550	5.36222
KEGG_PATHWAY	bta01130:Biosynthesis of antibiotics	10	2.36967	0.0296757	ARG2, SHMT2, PSAT1, GLDC, CTH, PYCR1, PHGDH, PSPH, PAFAH2, PCK2	160	206	7550	2.29066
Enrichment of KEGG pathways by genes with decreased expression 72h p.i. with strain ncp
Category	Term	Count	%	PValue	Genes	List Total	Pop Hits	Pop Total	Fold Enrichment
KEGG_PATHWAY	bta04610:Complement and coagulation cascades	11	4.68085	3.95157e-07	C3, F8, C1S, PLAU, C1R, F11, CFI, CD59, CD46, CD55, CFB	129	74	7550	8.69998
KEGG_PATHWAY	bta04142:Lysosome	11	4.68085	5.03472e-05	CTSA, MANBA, LAMP1, IDUA, HEXB, ATP6V0A2, CTSH, LITAF, GNS, CTSS, SGSH	129	126	7550	5.10951
KEGG_PATHWAY	bta05150:Staphylococcus aureus infection	8	3.40426	5.60091e-05	C3, C1S, C1R, ITGB2, CFI, FCGR2B, CFB, BOLA-DOB	129	59	7550	7.93588
KEGG_PATHWAY	bta04145:Phagosome	11	4.68085	0.000330492	C3, LAMP1, C1R, STX7, ITGB2, ATP6V0A2, FCGR2B, PLA2R1, THBS1, CTSS, BOLA-DOB	129	158	7550	4.07467
KEGG_PATHWAY	bta05166:HTLV-I infection	14	5.95745	0.0005643	FZD1, NRP1, EGR1, PDGFRA, CSF2, MAP3K1, ITGB2, GPS2, FOS, ADCY7, PPP3R1, MYC, MAP3K14, BOLA-DOB	129	267	7550	3.06884
KEGG_PATHWAY	bta05133:Pertussis	7	2.97872	0.00187213	C3, C1S, C1R, ITGB2, IRF8, FOS, CXCL5	129	77	7550	5.32065
KEGG_PATHWAY	bta01100:Metabolic pathways	34	14.4681	0.00406443	GALNT11, ADPGK, IDUA, HEXB, UXS1, GALNT18, CYP2C18, PIGV, GNS, SGSH, C1GALT1C1, SPTLC1, ALDH2, CHSY1, MAN2A1, ATP6V0A2, ST3GAL5, ENPP1, ME3, PRODH, HAO2, UGT2B10, CSGALNACT1, RRM1, UGT1A1, CHKA, IDH1, ACSL6, DPM1, GNPDA1, CYP2C87, TBXAS1, ALDOB, HPD	129	1235	7550	1.61127
KEGG_PATHWAY	bta00511:Other glycan degradation	4	1.70213	0.00439429	MANBA, HEXB, FUCA1, HEXDC	129	20	7550	11.7054
KEGG_PATHWAY	bta05323:Rheumatoid arthritis	7	2.97872	0.00536119	CSF2, ANGPT1, ITGB2, ATP6V0A2, FOS, CXCL5, BOLA-DOB	129	95	7550	4.31253
KEGG_PATHWAY	bta05204:Chemical carcinogenesis	6	2.55319	0.00650372	UGT2B10, UGT1A1, CYP2C87, GSTA2, CYP2C18, LOC615514	129	70	7550	5.01661
KEGG_PATHWAY	bta00531:Glycosaminoglycan degradation	4	1.70213	0.00657869	IDUA, HEXB, GNS, SGSH	129	23	7550	10.1786
KEGG_PATHWAY	bta05152:Tuberculosis	9	3.82979	0.0116141	C3, PPP3R1, LAMP1, ITGB2, ATP6V0A2, FCGR2B, PLA2R1, CTSS, BOLA-DOB	129	181	7550	2.91019
KEGG_PATHWAY	bta04640:Hematopoietic cell lineage	6	2.55319	0.0197079	CSF2, MME, CD9, CD59, DNTT, CD55	129	92	7550	3.81699
KEGG_PATHWAY	bta04668:TNF signaling pathway	6	2.55319	0.0361505	EDN1, CSF2, BCL3, FOS, CXCL3, MAP3K14	129	108	7550	3.25151
KEGG_PATHWAY	bta00053:Ascorbate and aldarate metabolism	3	1.2766	0.048547	UGT2B10, ALDH2, UGT1A1	129	21	7550	8.36102
